# Supplementary material for: Mobile Robot Obstacle Avoidance Based on Neural Network with a Standardization Technique
Source: Hindawi journal article supplement (doi:10.1155/2021/1129872), 2021-11-03
Supplement: f1 [file 1129872.f1.zip]

Archive with 2 entries (2 files):
- 1129872.f1/sample of training datasets after rescalling datasets.pdf
- 1129872.f1/sample of trainning datasets .pdf
