# Supplementary material for: Mobile Robot Obstacle Avoidance Based on Neural Network with a Standardization Technique
Source: Hindawi journal article supplement (doi:10.1155/2021/1129872), 2021-11-03
Supplement: f1 [file 1129872.f1.zip › 1129872.f1/sample of trainning datasets .pdf]

| INPUT    |           |           |            |             |             |                              |                      | OUTPUT                                    |
|----------|-----------|-----------|------------|-------------|-------------|------------------------------|----------------------|-------------------------------------------|
| US 1     | US 2      | US 3      | US 4       | US 5        | US 6        | angle of the goal            | location of the goal | servo motor<br>angle of robot<br>(action) |
| 0° : 30° | 31° : 60° | 61° : 90° | 91° : 120° | 121° : 150° | 151° : 180° | BY Coordinate from IP Camera |                      |                                           |
| 1        | 0         | 0         | 0          | 0           | 0           | 0                            | 7.5                  | 45                                        |
| 1        | 0         | 0         | 0          | 0           | 0           | 1                            | 7.5                  | 45                                        |
| 1        | 0         | 0         | 0          | 0           | 0           | 2                            | 7.5                  | 45                                        |
| 1        | 0         | 0         | 0          | 0           | 0           | 3                            | 7.5                  | 45                                        |
| 1        | 0         | 0         | 0          | 0           | 0           | 4                            | 7.5                  | 45                                        |
| 1        | 0         | 0         | 0          | 0           | 0           | 5                            | 7.5                  | 45                                        |
| 1        | 0         | 0         | 0          | 0           | 0           | 6                            | 7.5                  | 45                                        |
| 1        | 0         | 0         | 0          | 0           | 0           | 7                            | 7.5                  | 45                                        |
| 1        | 0         | 0         | 0          | 0           | 0           | 8                            | 7.5                  | 45                                        |
| 1        | 0         | 0         | 0          | 0           | 0           | 9                            | 7.5                  | 45                                        |
| 1        | 0         | 0         | 0          | 0           | 0           | 10                           | 7.5                  | 45                                        |
| 1        | 0         | 0         | 0          | 0           | 0           | 11                           | 7.5                  | 45                                        |
| 1        | 0         | 0         | 0          | 0           | 0           | 12                           | 7.5                  | 45                                        |
| 1        | 0         | 0         | 0          | 0           | 0           | 13                           | 7.5                  | 45                                        |
| 1        | 0         | 0         | 0          | 0           | 0           | 14                           | 7.5                  | 45                                        |
| 1        | 0         | 0         | 0          | 0           | 0           | 15                           | 7.5                  | 45                                        |
| 1        | 0         | 0         | 0          | 0           | 0           | 16                           | 7.5                  | 45                                        |
| 1        | 0         | 0         | 0          | 0           | 0           | 17                           | 7.5                  | 45                                        |
| 1        | 0         | 0         | 0          | 0           | 0           | 18                           | 7.5                  | 45                                        |
| 1        | 0         | 0         | 0          | 0           | 0           | 19                           | 7.5                  | 45                                        |
| 1        | 0         | 0         | 0          | 0           | 0           | 20                           | 7.5                  | 45                                        |
| 1        | 0         | 0         | 0          | 0           | 0           | 21                           | 7.5                  | 45                                        |
| 1        | 0         | 0         | 0          | 0           | 0           | 22                           | 7.5                  | 45                                        |
| 1        | 0         | 0         | 0          | 0           | 0           | 23                           | 7.5                  | 45                                        |
| 1        | 0         | 0         | 0          | 0           | 0           | 24                           | 7.5                  | 45                                        |
| 1        | 0         | 0         | 0          | 0           | 0           | 25                           | 7.5                  | 45                                        |
| 1        | 0         | 0         | 0          | 0           | 0           | 26                           | 7.5                  | 45                                        |
| 1        | 0         | 0         | 0          | 0           | 0           | 27                           | 7.5                  | 45                                        |
| 1        | 0         | 0         | 0          | 0           | 0           | 28                           | 7.5                  | 45                                        |
| 1        | 0         | 0         | 0          | 0           | 0           | 29                           | 7.5                  | 45                                        |
| 1        | 0         | 0         | 0          | 0           | 0           | 30                           | 7.5                  | 45                                        |
| 1        | 0         | 0         | 0          | 0           | 0           | 31                           | 7.5                  | 45                                        |
| 1        | 0         | 0         | 0          | 0           | 0           | 32                           | 7.5                  | 45                                        |
| 1        | 0         | 0         | 0          | 0           | 0           | 33                           | 7.5                  | 45                                        |
| 1        | 0         | 0         | 0          | 0           | 0           | 34                           | 7.5                  | 45                                        |
| 1        | 0         | 0         | 0          | 0           | 0           | 35                           | 7.5                  | 45                                        |
| 1        | 0         | 0         | 0          | 0           | 0           | 36                           | 7.5                  | 45                                        |
| 1        | 0         | 0         | 0          | 0           | 0           | 37                           | 7.5                  | 45                                        |
| 1        | 0         | 0         | 0          | 0           | 0           | 38                           | 7.5                  | 45                                        |
| 1        | 0         | 0         | 0          | 0           | 0           | 39                           | 7.5                  | 45                                        |

|   |   |   |   |   |   |    |     |    |
|---|---|---|---|---|---|----|-----|----|
| 1 | 0 | 0 | 0 | 0 | 0 | 40 | 7.5 | 45 |
| 1 | 0 | 0 | 0 | 0 | 0 | 41 | 7.5 | 45 |
| 1 | 0 | 0 | 0 | 0 | 0 | 42 | 7.5 | 45 |
| 1 | 0 | 0 | 0 | 0 | 0 | 43 | 7.5 | 45 |
| 1 | 0 | 0 | 0 | 0 | 0 | 44 | 7.5 | 45 |
| 1 | 0 | 0 | 0 | 0 | 0 | 45 | 7.5 | 45 |
| 1 | 0 | 0 | 0 | 0 | 0 | 46 | 7.5 | 45 |
| 1 | 0 | 0 | 0 | 0 | 0 | 47 | 7.5 | 45 |
| 1 | 0 | 0 | 0 | 0 | 0 | 48 | 7.5 | 45 |
| 1 | 0 | 0 | 0 | 0 | 0 | 49 | 7.5 | 45 |
| 1 | 0 | 0 | 0 | 0 | 0 | 50 | 7.5 | 45 |
| 1 | 0 | 0 | 0 | 0 | 0 | 51 | 7.5 | 45 |
| 1 | 0 | 0 | 0 | 0 | 0 | 52 | 7.5 | 45 |
| 1 | 0 | 0 | 0 | 0 | 0 | 53 | 7.5 | 45 |
| 1 | 0 | 0 | 0 | 0 | 0 | 54 | 7.5 | 45 |
| 1 | 0 | 0 | 0 | 0 | 0 | 55 | 7.5 | 45 |
| 1 | 0 | 0 | 0 | 0 | 0 | 56 | 7.5 | 45 |
| 1 | 0 | 0 | 0 | 0 | 0 | 57 | 7.5 | 45 |
| 1 | 0 | 0 | 0 | 0 | 0 | 58 | 7.5 | 45 |
| 1 | 0 | 0 | 0 | 0 | 0 | 59 | 7.5 | 45 |
| 1 | 0 | 0 | 0 | 0 | 0 | 60 | 7.5 | 60 |
| 1 | 0 | 0 | 0 | 0 | 0 | 61 | 7.5 | 75 |
| 1 | 0 | 0 | 0 | 0 | 0 | 62 | 7.5 | 75 |
| 1 | 0 | 0 | 0 | 0 | 0 | 63 | 7.5 | 75 |
| 1 | 0 | 0 | 0 | 0 | 0 | 64 | 7.5 | 75 |
| 1 | 0 | 0 | 0 | 0 | 0 | 65 | 7.5 | 75 |
| 1 | 0 | 0 | 0 | 0 | 0 | 66 | 7.5 | 75 |
| 1 | 0 | 0 | 0 | 0 | 0 | 67 | 7.5 | 75 |
| 1 | 0 | 0 | 0 | 0 | 0 | 68 | 7.5 | 75 |
| 1 | 0 | 0 | 0 | 0 | 0 | 69 | 7.5 | 75 |
| 1 | 0 | 0 | 0 | 0 | 0 | 70 | 7.5 | 75 |
| 1 | 0 | 0 | 0 | 0 | 0 | 71 | 7.5 | 75 |
| 1 | 0 | 0 | 0 | 0 | 0 | 72 | 7.5 | 75 |
| 1 | 0 | 0 | 0 | 0 | 0 | 73 | 7.5 | 75 |
| 1 | 0 | 0 | 0 | 0 | 0 | 74 | 7.5 | 75 |
| 1 | 0 | 0 | 0 | 0 | 0 | 75 | 7.5 | 75 |
| 1 | 0 | 0 | 0 | 0 | 0 | 76 | 7.5 | 75 |
| 1 | 0 | 0 | 0 | 0 | 0 | 77 | 7.5 | 75 |
| 1 | 0 | 0 | 0 | 0 | 0 | 78 | 7.5 | 75 |
| 1 | 0 | 0 | 0 | 0 | 0 | 79 | 7.5 | 75 |
| 1 | 0 | 0 | 0 | 0 | 0 | 80 | 7.5 | 75 |
| 1 | 0 | 0 | 0 | 0 | 0 | 81 | 7.5 | 75 |
| 1 | 0 | 0 | 0 | 0 | 0 | 82 | 7.5 | 75 |
| 1 | 0 | 0 | 0 | 0 | 0 | 83 | 7.5 | 75 |
| 1 | 0 | 0 | 0 | 0 | 0 | 84 | 7.5 | 75 |
| 1 | 0 | 0 | 0 | 0 | 0 | 85 | 7.5 | 75 |

|   |   |   |   |   |   |     |     |     |
|---|---|---|---|---|---|-----|-----|-----|
| 1 | 0 | 0 | 0 | 0 | 0 | 86  | 7.5 | 75  |
| 1 | 0 | 0 | 0 | 0 | 0 | 87  | 7.5 | 75  |
| 1 | 0 | 0 | 0 | 0 | 0 | 88  | 7.5 | 75  |
| 1 | 0 | 0 | 0 | 0 | 0 | 89  | 7.5 | 75  |
| 1 | 0 | 0 | 0 | 0 | 0 | 90  | 7.5 | 90  |
| 1 | 0 | 0 | 0 | 0 | 0 | 91  | 7.5 | 105 |
| 1 | 0 | 0 | 0 | 0 | 0 | 92  | 7.5 | 105 |
| 1 | 0 | 0 | 0 | 0 | 0 | 93  | 7.5 | 105 |
| 1 | 0 | 0 | 0 | 0 | 0 | 94  | 7.5 | 105 |
| 1 | 0 | 0 | 0 | 0 | 0 | 95  | 7.5 | 105 |
| 1 | 0 | 0 | 0 | 0 | 0 | 96  | 7.5 | 105 |
| 1 | 0 | 0 | 0 | 0 | 0 | 97  | 7.5 | 105 |
| 1 | 0 | 0 | 0 | 0 | 0 | 98  | 7.5 | 105 |
| 1 | 0 | 0 | 0 | 0 | 0 | 99  | 7.5 | 105 |
| 1 | 0 | 0 | 0 | 0 | 0 | 100 | 7.5 | 105 |
| 1 | 0 | 0 | 0 | 0 | 0 | 101 | 7.5 | 105 |
| 1 | 0 | 0 | 0 | 0 | 0 | 102 | 7.5 | 105 |
| 1 | 0 | 0 | 0 | 0 | 0 | 103 | 7.5 | 105 |
| 1 | 0 | 0 | 0 | 0 | 0 | 104 | 7.5 | 105 |
| 1 | 0 | 0 | 0 | 0 | 0 | 105 | 7.5 | 105 |
| 1 | 0 | 0 | 0 | 0 | 0 | 106 | 7.5 | 105 |
| 1 | 0 | 0 | 0 | 0 | 0 | 107 | 7.5 | 105 |
| 1 | 0 | 0 | 0 | 0 | 0 | 108 | 7.5 | 105 |
| 1 | 0 | 0 | 0 | 0 | 0 | 109 | 7.5 | 105 |
| 1 | 0 | 0 | 0 | 0 | 0 | 110 | 7.5 | 105 |
| 1 | 0 | 0 | 0 | 0 | 0 | 111 | 7.5 | 105 |
| 1 | 0 | 0 | 0 | 0 | 0 | 112 | 7.5 | 105 |
| 1 | 0 | 0 | 0 | 0 | 0 | 113 | 7.5 | 105 |
| 1 | 0 | 0 | 0 | 0 | 0 | 114 | 7.5 | 105 |
| 1 | 0 | 0 | 0 | 0 | 0 | 115 | 7.5 | 105 |
| 1 | 0 | 0 | 0 | 0 | 0 | 116 | 7.5 | 105 |
| 1 | 0 | 0 | 0 | 0 | 0 | 117 | 7.5 | 105 |
| 1 | 0 | 0 | 0 | 0 | 0 | 118 | 7.5 | 105 |
| 1 | 0 | 0 | 0 | 0 | 0 | 119 | 7.5 | 105 |
| 1 | 0 | 0 | 0 | 0 | 0 | 120 | 7.5 | 120 |
| 1 | 0 | 0 | 0 | 0 | 0 | 121 | 7.5 | 135 |
| 1 | 0 | 0 | 0 | 0 | 0 | 122 | 7.5 | 135 |
| 1 | 0 | 0 | 0 | 0 | 0 | 123 | 7.5 | 135 |
| 1 | 0 | 0 | 0 | 0 | 0 | 124 | 7.5 | 135 |
| 1 | 0 | 0 | 0 | 0 | 0 | 125 | 7.5 | 135 |
| 1 | 0 | 0 | 0 | 0 | 0 | 126 | 7.5 | 135 |
| 1 | 0 | 0 | 0 | 0 | 0 | 127 | 7.5 | 135 |
| 1 | 0 | 0 | 0 | 0 | 0 | 128 | 7.5 | 135 |
| 1 | 0 | 0 | 0 | 0 | 0 | 129 | 7.5 | 135 |
| 1 | 0 | 0 | 0 | 0 | 0 | 130 | 7.5 | 135 |
| 1 | 0 | 0 | 0 | 0 | 0 | 131 | 7.5 | 135 |

|   |   |   |   |   |   |     |     |     |
|---|---|---|---|---|---|-----|-----|-----|
| 1 | 0 | 0 | 0 | 0 | 0 | 132 | 7.5 | 135 |
| 1 | 0 | 0 | 0 | 0 | 0 | 133 | 7.5 | 135 |
| 1 | 0 | 0 | 0 | 0 | 0 | 134 | 7.5 | 135 |
| 1 | 0 | 0 | 0 | 0 | 0 | 135 | 7.5 | 135 |
| 1 | 0 | 0 | 0 | 0 | 0 | 136 | 7.5 | 135 |
| 1 | 0 | 0 | 0 | 0 | 0 | 137 | 7.5 | 135 |
| 1 | 0 | 0 | 0 | 0 | 0 | 138 | 7.5 | 135 |
| 1 | 0 | 0 | 0 | 0 | 0 | 139 | 7.5 | 135 |
| 1 | 0 | 0 | 0 | 0 | 0 | 140 | 7.5 | 135 |
| 1 | 0 | 0 | 0 | 0 | 0 | 141 | 7.5 | 135 |
| 1 | 0 | 0 | 0 | 0 | 0 | 142 | 7.5 | 135 |
| 1 | 0 | 0 | 0 | 0 | 0 | 143 | 7.5 | 135 |
| 1 | 0 | 0 | 0 | 0 | 0 | 144 | 7.5 | 135 |
| 1 | 0 | 0 | 0 | 0 | 0 | 145 | 7.5 | 135 |
| 1 | 0 | 0 | 0 | 0 | 0 | 146 | 7.5 | 135 |
| 1 | 0 | 0 | 0 | 0 | 0 | 147 | 7.5 | 135 |
| 1 | 0 | 0 | 0 | 0 | 0 | 148 | 7.5 | 135 |
| 1 | 0 | 0 | 0 | 0 | 0 | 149 | 7.5 | 135 |
| 1 | 0 | 0 | 0 | 0 | 0 | 150 | 7.5 | 150 |
| 1 | 0 | 0 | 0 | 0 | 0 | 151 | 7.5 | 165 |
| 1 | 0 | 0 | 0 | 0 | 0 | 152 | 7.5 | 165 |
| 1 | 0 | 0 | 0 | 0 | 0 | 153 | 7.5 | 165 |
| 1 | 0 | 0 | 0 | 0 | 0 | 154 | 7.5 | 165 |
| 1 | 0 | 0 | 0 | 0 | 0 | 155 | 7.5 | 165 |
| 1 | 0 | 0 | 0 | 0 | 0 | 156 | 7.5 | 165 |
| 1 | 0 | 0 | 0 | 0 | 0 | 157 | 7.5 | 165 |
| 1 | 0 | 0 | 0 | 0 | 0 | 158 | 7.5 | 165 |
| 1 | 0 | 0 | 0 | 0 | 0 | 159 | 7.5 | 165 |
| 1 | 0 | 0 | 0 | 0 | 0 | 160 | 7.5 | 165 |
| 1 | 0 | 0 | 0 | 0 | 0 | 161 | 7.5 | 165 |
| 1 | 0 | 0 | 0 | 0 | 0 | 162 | 7.5 | 165 |
| 1 | 0 | 0 | 0 | 0 | 0 | 163 | 7.5 | 165 |
| 1 | 0 | 0 | 0 | 0 | 0 | 164 | 7.5 | 165 |
| 1 | 0 | 0 | 0 | 0 | 0 | 165 | 7.5 | 165 |
| 1 | 0 | 0 | 0 | 0 | 0 | 166 | 7.5 | 165 |
| 1 | 0 | 0 | 0 | 0 | 0 | 167 | 7.5 | 165 |
| 1 | 0 | 0 | 0 | 0 | 0 | 168 | 7.5 | 165 |
| 1 | 0 | 0 | 0 | 0 | 0 | 169 | 7.5 | 165 |
| 1 | 0 | 0 | 0 | 0 | 0 | 170 | 7.5 | 165 |
| 1 | 0 | 0 | 0 | 0 | 0 | 171 | 7.5 | 165 |
| 1 | 0 | 0 | 0 | 0 | 0 | 172 | 7.5 | 165 |
| 1 | 0 | 0 | 0 | 0 | 0 | 173 | 7.5 | 165 |
| 1 | 0 | 0 | 0 | 0 | 0 | 174 | 7.5 | 165 |
| 1 | 0 | 0 | 0 | 0 | 0 | 175 | 7.5 | 165 |
| 1 | 0 | 0 | 0 | 0 | 0 | 176 | 7.5 | 165 |
| 1 | 0 | 0 | 0 | 0 | 0 | 177 | 7.5 | 165 |

|   |   |   |   |   |   |     |     |     |
|---|---|---|---|---|---|-----|-----|-----|
| 1 | 0 | 0 | 0 | 0 | 0 | 178 | 7.5 | 165 |
| 1 | 0 | 0 | 0 | 0 | 0 | 179 | 7.5 | 165 |
| 1 | 0 | 0 | 0 | 0 | 0 | 180 | 7.5 | 180 |
| 0 | 1 | 0 | 0 | 0 | 0 | 0   | 7.5 | 0   |
| 0 | 1 | 0 | 0 | 0 | 0 | 1   | 7.5 | 15  |
| 0 | 1 | 0 | 0 | 0 | 0 | 2   | 7.5 | 15  |
| 0 | 1 | 0 | 0 | 0 | 0 | 3   | 7.5 | 15  |
| 0 | 1 | 0 | 0 | 0 | 0 | 4   | 7.5 | 15  |
| 0 | 1 | 0 | 0 | 0 | 0 | 5   | 7.5 | 15  |
| 0 | 1 | 0 | 0 | 0 | 0 | 6   | 7.5 | 15  |
| 0 | 1 | 0 | 0 | 0 | 0 | 7   | 7.5 | 15  |
| 0 | 1 | 0 | 0 | 0 | 0 | 8   | 7.5 | 15  |
| 0 | 1 | 0 | 0 | 0 | 0 | 9   | 7.5 | 15  |
| 0 | 1 | 0 | 0 | 0 | 0 | 10  | 7.5 | 15  |
| 0 | 1 | 0 | 0 | 0 | 0 | 11  | 7.5 | 15  |
| 0 | 1 | 0 | 0 | 0 | 0 | 12  | 7.5 | 15  |
| 0 | 1 | 0 | 0 | 0 | 0 | 13  | 7.5 | 15  |
| 0 | 1 | 0 | 0 | 0 | 0 | 14  | 7.5 | 15  |
| 0 | 1 | 0 | 0 | 0 | 0 | 15  | 7.5 | 15  |
| 0 | 1 | 0 | 0 | 0 | 0 | 16  | 7.5 | 15  |
| 0 | 1 | 0 | 0 | 0 | 0 | 17  | 7.5 | 15  |
| 0 | 1 | 0 | 0 | 0 | 0 | 18  | 7.5 | 15  |
| 0 | 1 | 0 | 0 | 0 | 0 | 19  | 7.5 | 15  |
| 0 | 1 | 0 | 0 | 0 | 0 | 20  | 7.5 | 15  |
| 0 | 1 | 0 | 0 | 0 | 0 | 21  | 7.5 | 15  |
| 0 | 1 | 0 | 0 | 0 | 0 | 22  | 7.5 | 15  |
| 0 | 1 | 0 | 0 | 0 | 0 | 23  | 7.5 | 15  |
| 0 | 1 | 0 | 0 | 0 | 0 | 24  | 7.5 | 15  |
| 0 | 1 | 0 | 0 | 0 | 0 | 25  | 7.5 | 15  |
| 0 | 1 | 0 | 0 | 0 | 0 | 26  | 7.5 | 15  |
| 0 | 1 | 0 | 0 | 0 | 0 | 27  | 7.5 | 15  |
| 0 | 1 | 0 | 0 | 0 | 0 | 28  | 7.5 | 15  |
| 0 | 1 | 0 | 0 | 0 | 0 | 29  | 7.5 | 15  |
| 0 | 1 | 0 | 0 | 0 | 0 | 30  | 7.5 | 15  |
| 0 | 1 | 0 | 0 | 0 | 0 | 31  | 7.5 | 15  |
| 0 | 1 | 0 | 0 | 0 | 0 | 32  | 7.5 | 15  |
| 0 | 1 | 0 | 0 | 0 | 0 | 33  | 7.5 | 15  |
| 0 | 1 | 0 | 0 | 0 | 0 | 34  | 7.5 | 15  |
| 0 | 1 | 0 | 0 | 0 | 0 | 35  | 7.5 | 15  |
| 0 | 1 | 0 | 0 | 0 | 0 | 36  | 7.5 | 15  |
| 0 | 1 | 0 | 0 | 0 | 0 | 37  | 7.5 | 15  |
| 0 | 1 | 0 | 0 | 0 | 0 | 38  | 7.5 | 15  |
| 0 | 1 | 0 | 0 | 0 | 0 | 39  | 7.5 | 15  |
| 0 | 1 | 0 | 0 | 0 | 0 | 40  | 7.5 | 15  |
| 0 | 1 | 0 | 0 | 0 | 0 | 41  | 7.5 | 15  |
| 0 | 1 | 0 | 0 | 0 | 0 | 42  | 7.5 | 15  |

|   |   |   |   |   |   |    |     |    |
|---|---|---|---|---|---|----|-----|----|
| 0 | 1 | 0 | 0 | 0 | 0 | 43 | 7.5 | 15 |
| 0 | 1 | 0 | 0 | 0 | 0 | 44 | 7.5 | 15 |
| 0 | 1 | 0 | 0 | 0 | 0 | 45 | 7.5 | 15 |
| 0 | 1 | 0 | 0 | 0 | 0 | 46 | 7.5 | 75 |
| 0 | 1 | 0 | 0 | 0 | 0 | 47 | 7.5 | 75 |
| 0 | 1 | 0 | 0 | 0 | 0 | 48 | 7.5 | 75 |
| 0 | 1 | 0 | 0 | 0 | 0 | 49 | 7.5 | 75 |
| 0 | 1 | 0 | 0 | 0 | 0 | 50 | 7.5 | 75 |
| 0 | 1 | 0 | 0 | 0 | 0 | 51 | 7.5 | 75 |
| 0 | 1 | 0 | 0 | 0 | 0 | 52 | 7.5 | 75 |
| 0 | 1 | 0 | 0 | 0 | 0 | 53 | 7.5 | 75 |
| 0 | 1 | 0 | 0 | 0 | 0 | 54 | 7.5 | 75 |
| 0 | 1 | 0 | 0 | 0 | 0 | 55 | 7.5 | 75 |
| 0 | 1 | 0 | 0 | 0 | 0 | 56 | 7.5 | 75 |
| 0 | 1 | 0 | 0 | 0 | 0 | 57 | 7.5 | 75 |
| 0 | 1 | 0 | 0 | 0 | 0 | 58 | 7.5 | 75 |
| 0 | 1 | 0 | 0 | 0 | 0 | 59 | 7.5 | 75 |
| 0 | 1 | 0 | 0 | 0 | 0 | 60 | 7.5 | 75 |
| 0 | 1 | 0 | 0 | 0 | 0 | 61 | 7.5 | 75 |
| 0 | 1 | 0 | 0 | 0 | 0 | 62 | 7.5 | 75 |
| 0 | 1 | 0 | 0 | 0 | 0 | 63 | 7.5 | 75 |
| 0 | 1 | 0 | 0 | 0 | 0 | 64 | 7.5 | 75 |
| 0 | 1 | 0 | 0 | 0 | 0 | 65 | 7.5 | 75 |
| 0 | 1 | 0 | 0 | 0 | 0 | 66 | 7.5 | 75 |
| 0 | 1 | 0 | 0 | 0 | 0 | 67 | 7.5 | 75 |
| 0 | 1 | 0 | 0 | 0 | 0 | 68 | 7.5 | 75 |
| 0 | 1 | 0 | 0 | 0 | 0 | 69 | 7.5 | 75 |
| 0 | 1 | 0 | 0 | 0 | 0 | 70 | 7.5 | 75 |
| 0 | 1 | 0 | 0 | 0 | 0 | 71 | 7.5 | 75 |
| 0 | 1 | 0 | 0 | 0 | 0 | 72 | 7.5 | 75 |
| 0 | 1 | 0 | 0 | 0 | 0 | 73 | 7.5 | 75 |
| 0 | 1 | 0 | 0 | 0 | 0 | 74 | 7.5 | 75 |
| 0 | 1 | 0 | 0 | 0 | 0 | 75 | 7.5 | 75 |
| 0 | 1 | 0 | 0 | 0 | 0 | 76 | 7.5 | 75 |
| 0 | 1 | 0 | 0 | 0 | 0 | 77 | 7.5 | 75 |
| 0 | 1 | 0 | 0 | 0 | 0 | 78 | 7.5 | 75 |
| 0 | 1 | 0 | 0 | 0 | 0 | 79 | 7.5 | 75 |
| 0 | 1 | 0 | 0 | 0 | 0 | 80 | 7.5 | 75 |
| 0 | 1 | 0 | 0 | 0 | 0 | 81 | 7.5 | 75 |
| 0 | 1 | 0 | 0 | 0 | 0 | 82 | 7.5 | 75 |
| 0 | 1 | 0 | 0 | 0 | 0 | 83 | 7.5 | 75 |
| 0 | 1 | 0 | 0 | 0 | 0 | 84 | 7.5 | 75 |
| 0 | 1 | 0 | 0 | 0 | 0 | 85 | 7.5 | 75 |
| 0 | 1 | 0 | 0 | 0 | 0 | 86 | 7.5 | 75 |
| 0 | 1 | 0 | 0 | 0 | 0 | 87 | 7.5 | 75 |
| 0 | 1 | 0 | 0 | 0 | 0 | 88 | 7.5 | 75 |

|   |   |   |   |   |   |     |     |     |
|---|---|---|---|---|---|-----|-----|-----|
| 0 | 1 | 0 | 0 | 0 | 0 | 89  | 7.5 | 75  |
| 0 | 1 | 0 | 0 | 0 | 0 | 90  | 7.5 | 90  |
| 0 | 1 | 0 | 0 | 0 | 0 | 91  | 7.5 | 105 |
| 0 | 1 | 0 | 0 | 0 | 0 | 92  | 7.5 | 105 |
| 0 | 1 | 0 | 0 | 0 | 0 | 93  | 7.5 | 105 |
| 0 | 1 | 0 | 0 | 0 | 0 | 94  | 7.5 | 105 |
| 0 | 1 | 0 | 0 | 0 | 0 | 95  | 7.5 | 105 |
| 0 | 1 | 0 | 0 | 0 | 0 | 96  | 7.5 | 105 |
| 0 | 1 | 0 | 0 | 0 | 0 | 97  | 7.5 | 105 |
| 0 | 1 | 0 | 0 | 0 | 0 | 98  | 7.5 | 105 |
| 0 | 1 | 0 | 0 | 0 | 0 | 99  | 7.5 | 105 |
| 0 | 1 | 0 | 0 | 0 | 0 | 100 | 7.5 | 105 |
| 0 | 1 | 0 | 0 | 0 | 0 | 101 | 7.5 | 105 |
| 0 | 1 | 0 | 0 | 0 | 0 | 102 | 7.5 | 105 |
| 0 | 1 | 0 | 0 | 0 | 0 | 103 | 7.5 | 105 |
| 0 | 1 | 0 | 0 | 0 | 0 | 104 | 7.5 | 105 |
| 0 | 1 | 0 | 0 | 0 | 0 | 105 | 7.5 | 105 |
| 0 | 1 | 0 | 0 | 0 | 0 | 106 | 7.5 | 105 |
| 0 | 1 | 0 | 0 | 0 | 0 | 107 | 7.5 | 105 |
| 0 | 1 | 0 | 0 | 0 | 0 | 108 | 7.5 | 105 |
| 0 | 1 | 0 | 0 | 0 | 0 | 109 | 7.5 | 105 |
| 0 | 1 | 0 | 0 | 0 | 0 | 110 | 7.5 | 105 |
| 0 | 1 | 0 | 0 | 0 | 0 | 111 | 7.5 | 105 |
| 0 | 1 | 0 | 0 | 0 | 0 | 112 | 7.5 | 105 |
| 0 | 1 | 0 | 0 | 0 | 0 | 113 | 7.5 | 105 |
| 0 | 1 | 0 | 0 | 0 | 0 | 114 | 7.5 | 105 |
| 0 | 1 | 0 | 0 | 0 | 0 | 115 | 7.5 | 105 |
| 0 | 1 | 0 | 0 | 0 | 0 | 116 | 7.5 | 105 |
| 0 | 1 | 0 | 0 | 0 | 0 | 117 | 7.5 | 105 |
| 0 | 1 | 0 | 0 | 0 | 0 | 118 | 7.5 | 105 |
| 0 | 1 | 0 | 0 | 0 | 0 | 119 | 7.5 | 105 |
| 0 | 1 | 0 | 0 | 0 | 0 | 120 | 7.5 | 120 |
| 0 | 1 | 0 | 0 | 0 | 0 | 121 | 7.5 | 135 |
| 0 | 1 | 0 | 0 | 0 | 0 | 122 | 7.5 | 135 |
| 0 | 1 | 0 | 0 | 0 | 0 | 123 | 7.5 | 135 |
| 0 | 1 | 0 | 0 | 0 | 0 | 124 | 7.5 | 135 |
| 0 | 1 | 0 | 0 | 0 | 0 | 125 | 7.5 | 135 |
| 0 | 1 | 0 | 0 | 0 | 0 | 126 | 7.5 | 135 |
| 0 | 1 | 0 | 0 | 0 | 0 | 127 | 7.5 | 135 |
| 0 | 1 | 0 | 0 | 0 | 0 | 128 | 7.5 | 135 |
| 0 | 1 | 0 | 0 | 0 | 0 | 129 | 7.5 | 135 |
| 0 | 1 | 0 | 0 | 0 | 0 | 130 | 7.5 | 135 |
| 0 | 1 | 0 | 0 | 0 | 0 | 131 | 7.5 | 135 |
| 0 | 1 | 0 | 0 | 0 | 0 | 132 | 7.5 | 135 |
| 0 | 1 | 0 | 0 | 0 | 0 | 133 | 7.5 | 135 |
| 0 | 1 | 0 | 0 | 0 | 0 | 134 | 7.5 | 135 |

|   |   |   |   |   |   |     |     |     |
|---|---|---|---|---|---|-----|-----|-----|
| 0 | 1 | 0 | 0 | 0 | 0 | 135 | 7.5 | 135 |
| 0 | 1 | 0 | 0 | 0 | 0 | 136 | 7.5 | 135 |
| 0 | 1 | 0 | 0 | 0 | 0 | 137 | 7.5 | 135 |
| 0 | 1 | 0 | 0 | 0 | 0 | 138 | 7.5 | 135 |
| 0 | 1 | 0 | 0 | 0 | 0 | 139 | 7.5 | 135 |
| 0 | 1 | 0 | 0 | 0 | 0 | 140 | 7.5 | 135 |
| 0 | 1 | 0 | 0 | 0 | 0 | 141 | 7.5 | 135 |
| 0 | 1 | 0 | 0 | 0 | 0 | 142 | 7.5 | 135 |
| 0 | 1 | 0 | 0 | 0 | 0 | 143 | 7.5 | 135 |
| 0 | 1 | 0 | 0 | 0 | 0 | 144 | 7.5 | 135 |
| 0 | 1 | 0 | 0 | 0 | 0 | 145 | 7.5 | 135 |
| 0 | 1 | 0 | 0 | 0 | 0 | 146 | 7.5 | 135 |
| 0 | 1 | 0 | 0 | 0 | 0 | 147 | 7.5 | 135 |
| 0 | 1 | 0 | 0 | 0 | 0 | 148 | 7.5 | 135 |
| 0 | 1 | 0 | 0 | 0 | 0 | 149 | 7.5 | 135 |
| 0 | 1 | 0 | 0 | 0 | 0 | 150 | 7.5 | 150 |
| 0 | 1 | 0 | 0 | 0 | 0 | 151 | 7.5 | 165 |
| 0 | 1 | 0 | 0 | 0 | 0 | 152 | 7.5 | 165 |
| 0 | 1 | 0 | 0 | 0 | 0 | 153 | 7.5 | 165 |
| 0 | 1 | 0 | 0 | 0 | 0 | 154 | 7.5 | 165 |
| 0 | 1 | 0 | 0 | 0 | 0 | 155 | 7.5 | 165 |
| 0 | 1 | 0 | 0 | 0 | 0 | 156 | 7.5 | 165 |
| 0 | 1 | 0 | 0 | 0 | 0 | 157 | 7.5 | 165 |
| 0 | 1 | 0 | 0 | 0 | 0 | 158 | 7.5 | 165 |
| 0 | 1 | 0 | 0 | 0 | 0 | 159 | 7.5 | 165 |
| 0 | 1 | 0 | 0 | 0 | 0 | 160 | 7.5 | 165 |
| 0 | 1 | 0 | 0 | 0 | 0 | 161 | 7.5 | 165 |
| 0 | 1 | 0 | 0 | 0 | 0 | 162 | 7.5 | 165 |
| 0 | 1 | 0 | 0 | 0 | 0 | 163 | 7.5 | 165 |
| 0 | 1 | 0 | 0 | 0 | 0 | 164 | 7.5 | 165 |
| 0 | 1 | 0 | 0 | 0 | 0 | 165 | 7.5 | 165 |
| 0 | 1 | 0 | 0 | 0 | 0 | 166 | 7.5 | 165 |
| 0 | 1 | 0 | 0 | 0 | 0 | 167 | 7.5 | 165 |
| 0 | 1 | 0 | 0 | 0 | 0 | 168 | 7.5 | 165 |
| 0 | 1 | 0 | 0 | 0 | 0 | 169 | 7.5 | 165 |
| 0 | 1 | 0 | 0 | 0 | 0 | 170 | 7.5 | 165 |
| 0 | 1 | 0 | 0 | 0 | 0 | 171 | 7.5 | 165 |
| 0 | 1 | 0 | 0 | 0 | 0 | 172 | 7.5 | 165 |
| 0 | 1 | 0 | 0 | 0 | 0 | 173 | 7.5 | 165 |
| 0 | 1 | 0 | 0 | 0 | 0 | 174 | 7.5 | 165 |
| 0 | 1 | 0 | 0 | 0 | 0 | 175 | 7.5 | 165 |
| 0 | 1 | 0 | 0 | 0 | 0 | 176 | 7.5 | 165 |
| 0 | 1 | 0 | 0 | 0 | 0 | 177 | 7.5 | 165 |
| 0 | 1 | 0 | 0 | 0 | 0 | 178 | 7.5 | 165 |
| 0 | 1 | 0 | 0 | 0 | 0 | 179 | 7.5 | 165 |
| 0 | 1 | 0 | 0 | 0 | 0 | 180 | 7.5 | 180 |

|   |   |   |   |   |   |    |     |    |
|---|---|---|---|---|---|----|-----|----|
| 0 | 0 | 1 | 0 | 0 | 0 | 0  | 7.5 | 0  |
| 0 | 0 | 1 | 0 | 0 | 0 | 1  | 7.5 | 15 |
| 0 | 0 | 1 | 0 | 0 | 0 | 2  | 7.5 | 15 |
| 0 | 0 | 1 | 0 | 0 | 0 | 3  | 7.5 | 15 |
| 0 | 0 | 1 | 0 | 0 | 0 | 4  | 7.5 | 15 |
| 0 | 0 | 1 | 0 | 0 | 0 | 5  | 7.5 | 15 |
| 0 | 0 | 1 | 0 | 0 | 0 | 6  | 7.5 | 15 |
| 0 | 0 | 1 | 0 | 0 | 0 | 7  | 7.5 | 15 |
| 0 | 0 | 1 | 0 | 0 | 0 | 8  | 7.5 | 15 |
| 0 | 0 | 1 | 0 | 0 | 0 | 9  | 7.5 | 15 |
| 0 | 0 | 1 | 0 | 0 | 0 | 10 | 7.5 | 15 |
| 0 | 0 | 1 | 0 | 0 | 0 | 11 | 7.5 | 15 |
| 0 | 0 | 1 | 0 | 0 | 0 | 12 | 7.5 | 15 |
| 0 | 0 | 1 | 0 | 0 | 0 | 13 | 7.5 | 15 |
| 0 | 0 | 1 | 0 | 0 | 0 | 14 | 7.5 | 15 |
| 0 | 0 | 1 | 0 | 0 | 0 | 15 | 7.5 | 15 |
| 0 | 0 | 1 | 0 | 0 | 0 | 16 | 7.5 | 15 |
| 0 | 0 | 1 | 0 | 0 | 0 | 17 | 7.5 | 15 |
| 0 | 0 | 1 | 0 | 0 | 0 | 18 | 7.5 | 15 |
| 0 | 0 | 1 | 0 | 0 | 0 | 19 | 7.5 | 15 |
| 0 | 0 | 1 | 0 | 0 | 0 | 20 | 7.5 | 15 |
| 0 | 0 | 1 | 0 | 0 | 0 | 21 | 7.5 | 15 |
| 0 | 0 | 1 | 0 | 0 | 0 | 22 | 7.5 | 15 |
| 0 | 0 | 1 | 0 | 0 | 0 | 23 | 7.5 | 15 |
| 0 | 0 | 1 | 0 | 0 | 0 | 24 | 7.5 | 15 |
| 0 | 0 | 1 | 0 | 0 | 0 | 25 | 7.5 | 15 |
| 0 | 0 | 1 | 0 | 0 | 0 | 26 | 7.5 | 15 |
| 0 | 0 | 1 | 0 | 0 | 0 | 27 | 7.5 | 15 |
| 0 | 0 | 1 | 0 | 0 | 0 | 28 | 7.5 | 15 |
| 0 | 0 | 1 | 0 | 0 | 0 | 29 | 7.5 | 15 |
| 0 | 0 | 1 | 0 | 0 | 0 | 30 | 7.5 | 30 |
| 0 | 0 | 1 | 0 | 0 | 0 | 31 | 7.5 | 45 |
| 0 | 0 | 1 | 0 | 0 | 0 | 32 | 7.5 | 45 |
| 0 | 0 | 1 | 0 | 0 | 0 | 33 | 7.5 | 45 |
| 0 | 0 | 1 | 0 | 0 | 0 | 34 | 7.5 | 45 |
| 0 | 0 | 1 | 0 | 0 | 0 | 35 | 7.5 | 45 |
| 0 | 0 | 1 | 0 | 0 | 0 | 36 | 7.5 | 45 |
| 0 | 0 | 1 | 0 | 0 | 0 | 37 | 7.5 | 45 |
| 0 | 0 | 1 | 0 | 0 | 0 | 38 | 7.5 | 45 |
| 0 | 0 | 1 | 0 | 0 | 0 | 39 | 7.5 | 45 |
| 0 | 0 | 1 | 0 | 0 | 0 | 40 | 7.5 | 45 |
| 0 | 0 | 1 | 0 | 0 | 0 | 41 | 7.5 | 45 |
| 0 | 0 | 1 | 0 | 0 | 0 | 42 | 7.5 | 45 |
| 0 | 0 | 1 | 0 | 0 | 0 | 43 | 7.5 | 45 |
| 0 | 0 | 1 | 0 | 0 | 0 | 44 | 7.5 | 45 |
| 0 | 0 | 1 | 0 | 0 | 0 | 45 | 7.5 | 45 |

|   |   |   |   |   |   |    |     |     |
|---|---|---|---|---|---|----|-----|-----|
| 0 | 0 | 1 | 0 | 0 | 0 | 46 | 7.5 | 45  |
| 0 | 0 | 1 | 0 | 0 | 0 | 47 | 7.5 | 45  |
| 0 | 0 | 1 | 0 | 0 | 0 | 48 | 7.5 | 45  |
| 0 | 0 | 1 | 0 | 0 | 0 | 49 | 7.5 | 45  |
| 0 | 0 | 1 | 0 | 0 | 0 | 50 | 7.5 | 45  |
| 0 | 0 | 1 | 0 | 0 | 0 | 51 | 7.5 | 45  |
| 0 | 0 | 1 | 0 | 0 | 0 | 52 | 7.5 | 45  |
| 0 | 0 | 1 | 0 | 0 | 0 | 53 | 7.5 | 45  |
| 0 | 0 | 1 | 0 | 0 | 0 | 54 | 7.5 | 45  |
| 0 | 0 | 1 | 0 | 0 | 0 | 55 | 7.5 | 45  |
| 0 | 0 | 1 | 0 | 0 | 0 | 56 | 7.5 | 45  |
| 0 | 0 | 1 | 0 | 0 | 0 | 57 | 7.5 | 45  |
| 0 | 0 | 1 | 0 | 0 | 0 | 58 | 7.5 | 45  |
| 0 | 0 | 1 | 0 | 0 | 0 | 59 | 7.5 | 45  |
| 0 | 0 | 1 | 0 | 0 | 0 | 60 | 7.5 | 45  |
| 0 | 0 | 1 | 0 | 0 | 0 | 61 | 7.5 | 45  |
| 0 | 0 | 1 | 0 | 0 | 0 | 62 | 7.5 | 45  |
| 0 | 0 | 1 | 0 | 0 | 0 | 63 | 7.5 | 45  |
| 0 | 0 | 1 | 0 | 0 | 0 | 64 | 7.5 | 45  |
| 0 | 0 | 1 | 0 | 0 | 0 | 65 | 7.5 | 45  |
| 0 | 0 | 1 | 0 | 0 | 0 | 66 | 7.5 | 45  |
| 0 | 0 | 1 | 0 | 0 | 0 | 67 | 7.5 | 45  |
| 0 | 0 | 1 | 0 | 0 | 0 | 68 | 7.5 | 45  |
| 0 | 0 | 1 | 0 | 0 | 0 | 69 | 7.5 | 45  |
| 0 | 0 | 1 | 0 | 0 | 0 | 70 | 7.5 | 45  |
| 0 | 0 | 1 | 0 | 0 | 0 | 71 | 7.5 | 45  |
| 0 | 0 | 1 | 0 | 0 | 0 | 72 | 7.5 | 45  |
| 0 | 0 | 1 | 0 | 0 | 0 | 73 | 7.5 | 45  |
| 0 | 0 | 1 | 0 | 0 | 0 | 74 | 7.5 | 45  |
| 0 | 0 | 1 | 0 | 0 | 0 | 75 | 7.5 | 45  |
| 0 | 0 | 1 | 0 | 0 | 0 | 76 | 7.5 | 105 |
| 0 | 0 | 1 | 0 | 0 | 0 | 77 | 7.5 | 105 |
| 0 | 0 | 1 | 0 | 0 | 0 | 78 | 7.5 | 105 |
| 0 | 0 | 1 | 0 | 0 | 0 | 79 | 7.5 | 105 |
| 0 | 0 | 1 | 0 | 0 | 0 | 80 | 7.5 | 105 |
| 0 | 0 | 1 | 0 | 0 | 0 | 81 | 7.5 | 105 |
| 0 | 0 | 1 | 0 | 0 | 0 | 82 | 7.5 | 105 |
| 0 | 0 | 1 | 0 | 0 | 0 | 83 | 7.5 | 105 |
| 0 | 0 | 1 | 0 | 0 | 0 | 84 | 7.5 | 105 |
| 0 | 0 | 1 | 0 | 0 | 0 | 85 | 7.5 | 105 |
| 0 | 0 | 1 | 0 | 0 | 0 | 86 | 7.5 | 105 |
| 0 | 0 | 1 | 0 | 0 | 0 | 87 | 7.5 | 105 |
| 0 | 0 | 1 | 0 | 0 | 0 | 88 | 7.5 | 105 |
| 0 | 0 | 1 | 0 | 0 | 0 | 89 | 7.5 | 105 |
| 0 | 0 | 1 | 0 | 0 | 0 | 90 | 7.5 | 105 |
| 0 | 0 | 1 | 0 | 0 | 0 | 91 | 7.5 | 105 |

|   |   |   |   |   |   |     |     |     |
|---|---|---|---|---|---|-----|-----|-----|
| 0 | 0 | 1 | 0 | 0 | 0 | 92  | 7.5 | 105 |
| 0 | 0 | 1 | 0 | 0 | 0 | 93  | 7.5 | 105 |
| 0 | 0 | 1 | 0 | 0 | 0 | 94  | 7.5 | 105 |
| 0 | 0 | 1 | 0 | 0 | 0 | 95  | 7.5 | 105 |
| 0 | 0 | 1 | 0 | 0 | 0 | 96  | 7.5 | 105 |
| 0 | 0 | 1 | 0 | 0 | 0 | 97  | 7.5 | 105 |
| 0 | 0 | 1 | 0 | 0 | 0 | 98  | 7.5 | 105 |
| 0 | 0 | 1 | 0 | 0 | 0 | 99  | 7.5 | 105 |
| 0 | 0 | 1 | 0 | 0 | 0 | 100 | 7.5 | 105 |
| 0 | 0 | 1 | 0 | 0 | 0 | 101 | 7.5 | 105 |
| 0 | 0 | 1 | 0 | 0 | 0 | 102 | 7.5 | 105 |
| 0 | 0 | 1 | 0 | 0 | 0 | 103 | 7.5 | 105 |
| 0 | 0 | 1 | 0 | 0 | 0 | 104 | 7.5 | 105 |
| 0 | 0 | 1 | 0 | 0 | 0 | 105 | 7.5 | 105 |
| 0 | 0 | 1 | 0 | 0 | 0 | 106 | 7.5 | 105 |
| 0 | 0 | 1 | 0 | 0 | 0 | 107 | 7.5 | 105 |
| 0 | 0 | 1 | 0 | 0 | 0 | 108 | 7.5 | 105 |
| 0 | 0 | 1 | 0 | 0 | 0 | 109 | 7.5 | 105 |
| 0 | 0 | 1 | 0 | 0 | 0 | 110 | 7.5 | 105 |
| 0 | 0 | 1 | 0 | 0 | 0 | 111 | 7.5 | 105 |
| 0 | 0 | 1 | 0 | 0 | 0 | 112 | 7.5 | 105 |
| 0 | 0 | 1 | 0 | 0 | 0 | 113 | 7.5 | 105 |
| 0 | 0 | 1 | 0 | 0 | 0 | 114 | 7.5 | 105 |
| 0 | 0 | 1 | 0 | 0 | 0 | 115 | 7.5 | 105 |
| 0 | 0 | 1 | 0 | 0 | 0 | 116 | 7.5 | 105 |
| 0 | 0 | 1 | 0 | 0 | 0 | 117 | 7.5 | 105 |
| 0 | 0 | 1 | 0 | 0 | 0 | 118 | 7.5 | 105 |
| 0 | 0 | 1 | 0 | 0 | 0 | 119 | 7.5 | 105 |
| 0 | 0 | 1 | 0 | 0 | 0 | 120 | 7.5 | 120 |
| 0 | 0 | 1 | 0 | 0 | 0 | 121 | 7.5 | 135 |
| 0 | 0 | 1 | 0 | 0 | 0 | 122 | 7.5 | 135 |
| 0 | 0 | 1 | 0 | 0 | 0 | 123 | 7.5 | 135 |
| 0 | 0 | 1 | 0 | 0 | 0 | 124 | 7.5 | 135 |
| 0 | 0 | 1 | 0 | 0 | 0 | 125 | 7.5 | 135 |
| 0 | 0 | 1 | 0 | 0 | 0 | 126 | 7.5 | 135 |
| 0 | 0 | 1 | 0 | 0 | 0 | 127 | 7.5 | 135 |
| 0 | 0 | 1 | 0 | 0 | 0 | 128 | 7.5 | 135 |
| 0 | 0 | 1 | 0 | 0 | 0 | 129 | 7.5 | 135 |
| 0 | 0 | 1 | 0 | 0 | 0 | 130 | 7.5 | 135 |
| 0 | 0 | 1 | 0 | 0 | 0 | 131 | 7.5 | 135 |
| 0 | 0 | 1 | 0 | 0 | 0 | 132 | 7.5 | 135 |
| 0 | 0 | 1 | 0 | 0 | 0 | 133 | 7.5 | 135 |
| 0 | 0 | 1 | 0 | 0 | 0 | 134 | 7.5 | 135 |
| 0 | 0 | 1 | 0 | 0 | 0 | 135 | 7.5 | 135 |
| 0 | 0 | 1 | 0 | 0 | 0 | 136 | 7.5 | 135 |
| 0 | 0 | 1 | 0 | 0 | 0 | 137 | 7.5 | 135 |

|   |   |   |   |   |   |     |     |     |
|---|---|---|---|---|---|-----|-----|-----|
| 0 | 0 | 1 | 0 | 0 | 0 | 138 | 7.5 | 135 |
| 0 | 0 | 1 | 0 | 0 | 0 | 139 | 7.5 | 135 |
| 0 | 0 | 1 | 0 | 0 | 0 | 140 | 7.5 | 135 |
| 0 | 0 | 1 | 0 | 0 | 0 | 141 | 7.5 | 135 |
| 0 | 0 | 1 | 0 | 0 | 0 | 142 | 7.5 | 135 |
| 0 | 0 | 1 | 0 | 0 | 0 | 143 | 7.5 | 135 |
| 0 | 0 | 1 | 0 | 0 | 0 | 144 | 7.5 | 135 |
| 0 | 0 | 1 | 0 | 0 | 0 | 145 | 7.5 | 135 |
| 0 | 0 | 1 | 0 | 0 | 0 | 146 | 7.5 | 135 |
| 0 | 0 | 1 | 0 | 0 | 0 | 147 | 7.5 | 135 |
| 0 | 0 | 1 | 0 | 0 | 0 | 148 | 7.5 | 135 |
| 0 | 0 | 1 | 0 | 0 | 0 | 149 | 7.5 | 135 |
| 0 | 0 | 1 | 0 | 0 | 0 | 150 | 7.5 | 150 |
| 0 | 0 | 1 | 0 | 0 | 0 | 151 | 7.5 | 165 |
| 0 | 0 | 1 | 0 | 0 | 0 | 152 | 7.5 | 165 |
| 0 | 0 | 1 | 0 | 0 | 0 | 153 | 7.5 | 165 |
| 0 | 0 | 1 | 0 | 0 | 0 | 154 | 7.5 | 165 |
| 0 | 0 | 1 | 0 | 0 | 0 | 155 | 7.5 | 165 |
| 0 | 0 | 1 | 0 | 0 | 0 | 156 | 7.5 | 165 |
| 0 | 0 | 1 | 0 | 0 | 0 | 157 | 7.5 | 165 |
| 0 | 0 | 1 | 0 | 0 | 0 | 158 | 7.5 | 165 |
| 0 | 0 | 1 | 0 | 0 | 0 | 159 | 7.5 | 165 |
| 0 | 0 | 1 | 0 | 0 | 0 | 160 | 7.5 | 165 |
| 0 | 0 | 1 | 0 | 0 | 0 | 161 | 7.5 | 165 |
| 0 | 0 | 1 | 0 | 0 | 0 | 162 | 7.5 | 165 |
| 0 | 0 | 1 | 0 | 0 | 0 | 163 | 7.5 | 165 |
| 0 | 0 | 1 | 0 | 0 | 0 | 164 | 7.5 | 165 |
| 0 | 0 | 1 | 0 | 0 | 0 | 165 | 7.5 | 165 |
| 0 | 0 | 1 | 0 | 0 | 0 | 166 | 7.5 | 165 |
| 0 | 0 | 1 | 0 | 0 | 0 | 167 | 7.5 | 165 |
| 0 | 0 | 1 | 0 | 0 | 0 | 168 | 7.5 | 165 |
| 0 | 0 | 1 | 0 | 0 | 0 | 169 | 7.5 | 165 |
| 0 | 0 | 1 | 0 | 0 | 0 | 170 | 7.5 | 165 |
| 0 | 0 | 1 | 0 | 0 | 0 | 171 | 7.5 | 165 |
| 0 | 0 | 1 | 0 | 0 | 0 | 172 | 7.5 | 165 |
| 0 | 0 | 1 | 0 | 0 | 0 | 173 | 7.5 | 165 |
| 0 | 0 | 1 | 0 | 0 | 0 | 174 | 7.5 | 165 |
| 0 | 0 | 1 | 0 | 0 | 0 | 175 | 7.5 | 165 |
| 0 | 0 | 1 | 0 | 0 | 0 | 176 | 7.5 | 165 |
| 0 | 0 | 1 | 0 | 0 | 0 | 177 | 7.5 | 165 |
| 0 | 0 | 1 | 0 | 0 | 0 | 178 | 7.5 | 165 |
| 0 | 0 | 1 | 0 | 0 | 0 | 179 | 7.5 | 165 |
| 0 | 0 | 1 | 0 | 0 | 0 | 180 | 7.5 | 180 |
| 0 | 0 | 0 | 1 | 0 | 0 | 0   | 7.5 | 0   |
| 0 | 0 | 0 | 1 | 0 | 0 | 1   | 7.5 | 15  |
| 0 | 0 | 0 | 1 | 0 | 0 | 2   | 7.5 | 15  |

|   |   |   |   |   |   |    |     |    |
|---|---|---|---|---|---|----|-----|----|
| 0 | 0 | 0 | 1 | 0 | 0 | 3  | 7.5 | 15 |
| 0 | 0 | 0 | 1 | 0 | 0 | 4  | 7.5 | 15 |
| 0 | 0 | 0 | 1 | 0 | 0 | 5  | 7.5 | 15 |
| 0 | 0 | 0 | 1 | 0 | 0 | 6  | 7.5 | 15 |
| 0 | 0 | 0 | 1 | 0 | 0 | 7  | 7.5 | 15 |
| 0 | 0 | 0 | 1 | 0 | 0 | 8  | 7.5 | 15 |
| 0 | 0 | 0 | 1 | 0 | 0 | 9  | 7.5 | 15 |
| 0 | 0 | 0 | 1 | 0 | 0 | 10 | 7.5 | 15 |
| 0 | 0 | 0 | 1 | 0 | 0 | 11 | 7.5 | 15 |
| 0 | 0 | 0 | 1 | 0 | 0 | 12 | 7.5 | 15 |
| 0 | 0 | 0 | 1 | 0 | 0 | 13 | 7.5 | 15 |
| 0 | 0 | 0 | 1 | 0 | 0 | 14 | 7.5 | 15 |
| 0 | 0 | 0 | 1 | 0 | 0 | 15 | 7.5 | 15 |
| 0 | 0 | 0 | 1 | 0 | 0 | 16 | 7.5 | 15 |
| 0 | 0 | 0 | 1 | 0 | 0 | 17 | 7.5 | 15 |
| 0 | 0 | 0 | 1 | 0 | 0 | 18 | 7.5 | 15 |
| 0 | 0 | 0 | 1 | 0 | 0 | 19 | 7.5 | 15 |
| 0 | 0 | 0 | 1 | 0 | 0 | 20 | 7.5 | 15 |
| 0 | 0 | 0 | 1 | 0 | 0 | 21 | 7.5 | 15 |
| 0 | 0 | 0 | 1 | 0 | 0 | 22 | 7.5 | 15 |
| 0 | 0 | 0 | 1 | 0 | 0 | 23 | 7.5 | 15 |
| 0 | 0 | 0 | 1 | 0 | 0 | 24 | 7.5 | 15 |
| 0 | 0 | 0 | 1 | 0 | 0 | 25 | 7.5 | 15 |
| 0 | 0 | 0 | 1 | 0 | 0 | 26 | 7.5 | 15 |
| 0 | 0 | 0 | 1 | 0 | 0 | 27 | 7.5 | 15 |
| 0 | 0 | 0 | 1 | 0 | 0 | 28 | 7.5 | 15 |
| 0 | 0 | 0 | 1 | 0 | 0 | 29 | 7.5 | 15 |
| 0 | 0 | 0 | 1 | 0 | 0 | 30 | 7.5 | 30 |
| 0 | 0 | 0 | 1 | 0 | 0 | 31 | 7.5 | 45 |
| 0 | 0 | 0 | 1 | 0 | 0 | 32 | 7.5 | 45 |
| 0 | 0 | 0 | 1 | 0 | 0 | 33 | 7.5 | 45 |
| 0 | 0 | 0 | 1 | 0 | 0 | 34 | 7.5 | 45 |
| 0 | 0 | 0 | 1 | 0 | 0 | 35 | 7.5 | 45 |
| 0 | 0 | 0 | 1 | 0 | 0 | 36 | 7.5 | 45 |
| 0 | 0 | 0 | 1 | 0 | 0 | 37 | 7.5 | 45 |
| 0 | 0 | 0 | 1 | 0 | 0 | 38 | 7.5 | 45 |
| 0 | 0 | 0 | 1 | 0 | 0 | 39 | 7.5 | 45 |
| 0 | 0 | 0 | 1 | 0 | 0 | 40 | 7.5 | 45 |
| 0 | 0 | 0 | 1 | 0 | 0 | 41 | 7.5 | 45 |
| 0 | 0 | 0 | 1 | 0 | 0 | 42 | 7.5 | 45 |
| 0 | 0 | 0 | 1 | 0 | 0 | 43 | 7.5 | 45 |
| 0 | 0 | 0 | 1 | 0 | 0 | 44 | 7.5 | 45 |
| 0 | 0 | 0 | 1 | 0 | 0 | 45 | 7.5 | 45 |
| 0 | 0 | 0 | 1 | 0 | 0 | 46 | 7.5 | 45 |
| 0 | 0 | 0 | 1 | 0 | 0 | 47 | 7.5 | 45 |
| 0 | 0 | 0 | 1 | 0 | 0 | 48 | 7.5 | 45 |

|   |   |   |   |   |   |    |     |    |
|---|---|---|---|---|---|----|-----|----|
| 0 | 0 | 0 | 1 | 0 | 0 | 49 | 7.5 | 45 |
| 0 | 0 | 0 | 1 | 0 | 0 | 50 | 7.5 | 45 |
| 0 | 0 | 0 | 1 | 0 | 0 | 51 | 7.5 | 45 |
| 0 | 0 | 0 | 1 | 0 | 0 | 52 | 7.5 | 45 |
| 0 | 0 | 0 | 1 | 0 | 0 | 53 | 7.5 | 45 |
| 0 | 0 | 0 | 1 | 0 | 0 | 54 | 7.5 | 45 |
| 0 | 0 | 0 | 1 | 0 | 0 | 55 | 7.5 | 45 |
| 0 | 0 | 0 | 1 | 0 | 0 | 56 | 7.5 | 45 |
| 0 | 0 | 0 | 1 | 0 | 0 | 57 | 7.5 | 45 |
| 0 | 0 | 0 | 1 | 0 | 0 | 58 | 7.5 | 45 |
| 0 | 0 | 0 | 1 | 0 | 0 | 59 | 7.5 | 45 |
| 0 | 0 | 0 | 1 | 0 | 0 | 60 | 7.5 | 60 |
| 0 | 0 | 0 | 1 | 0 | 0 | 61 | 7.5 | 75 |
| 0 | 0 | 0 | 1 | 0 | 0 | 62 | 7.5 | 75 |
| 0 | 0 | 0 | 1 | 0 | 0 | 63 | 7.5 | 75 |
| 0 | 0 | 0 | 1 | 0 | 0 | 64 | 7.5 | 75 |
| 0 | 0 | 0 | 1 | 0 | 0 | 65 | 7.5 | 75 |
| 0 | 0 | 0 | 1 | 0 | 0 | 66 | 7.5 | 75 |
| 0 | 0 | 0 | 1 | 0 | 0 | 67 | 7.5 | 75 |
| 0 | 0 | 0 | 1 | 0 | 0 | 68 | 7.5 | 75 |
| 0 | 0 | 0 | 1 | 0 | 0 | 69 | 7.5 | 75 |
| 0 | 0 | 0 | 1 | 0 | 0 | 70 | 7.5 | 75 |
| 0 | 0 | 0 | 1 | 0 | 0 | 71 | 7.5 | 75 |
| 0 | 0 | 0 | 1 | 0 | 0 | 72 | 7.5 | 75 |
| 0 | 0 | 0 | 1 | 0 | 0 | 73 | 7.5 | 75 |
| 0 | 0 | 0 | 1 | 0 | 0 | 74 | 7.5 | 75 |
| 0 | 0 | 0 | 1 | 0 | 0 | 75 | 7.5 | 75 |
| 0 | 0 | 0 | 1 | 0 | 0 | 76 | 7.5 | 75 |
| 0 | 0 | 0 | 1 | 0 | 0 | 77 | 7.5 | 75 |
| 0 | 0 | 0 | 1 | 0 | 0 | 78 | 7.5 | 75 |
| 0 | 0 | 0 | 1 | 0 | 0 | 79 | 7.5 | 75 |
| 0 | 0 | 0 | 1 | 0 | 0 | 80 | 7.5 | 75 |
| 0 | 0 | 0 | 1 | 0 | 0 | 81 | 7.5 | 75 |
| 0 | 0 | 0 | 1 | 0 | 0 | 82 | 7.5 | 75 |
| 0 | 0 | 0 | 1 | 0 | 0 | 83 | 7.5 | 75 |
| 0 | 0 | 0 | 1 | 0 | 0 | 84 | 7.5 | 75 |
| 0 | 0 | 0 | 1 | 0 | 0 | 85 | 7.5 | 75 |
| 0 | 0 | 0 | 1 | 0 | 0 | 86 | 7.5 | 75 |
| 0 | 0 | 0 | 1 | 0 | 0 | 87 | 7.5 | 75 |
| 0 | 0 | 0 | 1 | 0 | 0 | 88 | 7.5 | 75 |
| 0 | 0 | 0 | 1 | 0 | 0 | 89 | 7.5 | 75 |
| 0 | 0 | 0 | 1 | 0 | 0 | 90 | 7.5 | 75 |
| 0 | 0 | 0 | 1 | 0 | 0 | 91 | 7.5 | 75 |
| 0 | 0 | 0 | 1 | 0 | 0 | 92 | 7.5 | 75 |
| 0 | 0 | 0 | 1 | 0 | 0 | 93 | 7.5 | 75 |
| 0 | 0 | 0 | 1 | 0 | 0 | 94 | 7.5 | 75 |

|   |   |   |   |   |   |     |     |     |
|---|---|---|---|---|---|-----|-----|-----|
| 0 | 0 | 0 | 1 | 0 | 0 | 95  | 7.5 | 75  |
| 0 | 0 | 0 | 1 | 0 | 0 | 96  | 7.5 | 75  |
| 0 | 0 | 0 | 1 | 0 | 0 | 97  | 7.5 | 75  |
| 0 | 0 | 0 | 1 | 0 | 0 | 98  | 7.5 | 75  |
| 0 | 0 | 0 | 1 | 0 | 0 | 99  | 7.5 | 75  |
| 0 | 0 | 0 | 1 | 0 | 0 | 100 | 7.5 | 75  |
| 0 | 0 | 0 | 1 | 0 | 0 | 101 | 7.5 | 75  |
| 0 | 0 | 0 | 1 | 0 | 0 | 102 | 7.5 | 75  |
| 0 | 0 | 0 | 1 | 0 | 0 | 103 | 7.5 | 75  |
| 0 | 0 | 0 | 1 | 0 | 0 | 104 | 7.5 | 75  |
| 0 | 0 | 0 | 1 | 0 | 0 | 105 | 7.5 | 75  |
| 0 | 0 | 0 | 1 | 0 | 0 | 106 | 7.5 | 135 |
| 0 | 0 | 0 | 1 | 0 | 0 | 107 | 7.5 | 135 |
| 0 | 0 | 0 | 1 | 0 | 0 | 108 | 7.5 | 135 |
| 0 | 0 | 0 | 1 | 0 | 0 | 109 | 7.5 | 135 |
| 0 | 0 | 0 | 1 | 0 | 0 | 110 | 7.5 | 135 |
| 0 | 0 | 0 | 1 | 0 | 0 | 111 | 7.5 | 135 |
| 0 | 0 | 0 | 1 | 0 | 0 | 112 | 7.5 | 135 |
| 0 | 0 | 0 | 1 | 0 | 0 | 113 | 7.5 | 135 |
| 0 | 0 | 0 | 1 | 0 | 0 | 114 | 7.5 | 135 |
| 0 | 0 | 0 | 1 | 0 | 0 | 115 | 7.5 | 135 |
| 0 | 0 | 0 | 1 | 0 | 0 | 116 | 7.5 | 135 |
| 0 | 0 | 0 | 1 | 0 | 0 | 117 | 7.5 | 135 |
| 0 | 0 | 0 | 1 | 0 | 0 | 118 | 7.5 | 135 |
| 0 | 0 | 0 | 1 | 0 | 0 | 119 | 7.5 | 135 |
| 0 | 0 | 0 | 1 | 0 | 0 | 120 | 7.5 | 135 |
| 0 | 0 | 0 | 1 | 0 | 0 | 121 | 7.5 | 135 |
| 0 | 0 | 0 | 1 | 0 | 0 | 122 | 7.5 | 135 |
| 0 | 0 | 0 | 1 | 0 | 0 | 123 | 7.5 | 135 |
| 0 | 0 | 0 | 1 | 0 | 0 | 124 | 7.5 | 135 |
| 0 | 0 | 0 | 1 | 0 | 0 | 125 | 7.5 | 135 |
| 0 | 0 | 0 | 1 | 0 | 0 | 126 | 7.5 | 135 |
| 0 | 0 | 0 | 1 | 0 | 0 | 127 | 7.5 | 135 |
| 0 | 0 | 0 | 1 | 0 | 0 | 128 | 7.5 | 135 |
| 0 | 0 | 0 | 1 | 0 | 0 | 129 | 7.5 | 135 |
| 0 | 0 | 0 | 1 | 0 | 0 | 130 | 7.5 | 135 |
| 0 | 0 | 0 | 1 | 0 | 0 | 131 | 7.5 | 135 |
| 0 | 0 | 0 | 1 | 0 | 0 | 132 | 7.5 | 135 |
| 0 | 0 | 0 | 1 | 0 | 0 | 133 | 7.5 | 135 |
| 0 | 0 | 0 | 1 | 0 | 0 | 134 | 7.5 | 135 |
| 0 | 0 | 0 | 1 | 0 | 0 | 135 | 7.5 | 135 |
| 0 | 0 | 0 | 1 | 0 | 0 | 136 | 7.5 | 135 |
| 0 | 0 | 0 | 1 | 0 | 0 | 137 | 7.5 | 135 |
| 0 | 0 | 0 | 1 | 0 | 0 | 138 | 7.5 | 135 |
| 0 | 0 | 0 | 1 | 0 | 0 | 139 | 7.5 | 135 |
| 0 | 0 | 0 | 1 | 0 | 0 | 140 | 7.5 | 135 |

|   |   |   |   |   |   |     |     |     |
|---|---|---|---|---|---|-----|-----|-----|
| 0 | 0 | 0 | 1 | 0 | 0 | 141 | 7.5 | 135 |
| 0 | 0 | 0 | 1 | 0 | 0 | 142 | 7.5 | 135 |
| 0 | 0 | 0 | 1 | 0 | 0 | 143 | 7.5 | 135 |
| 0 | 0 | 0 | 1 | 0 | 0 | 144 | 7.5 | 135 |
| 0 | 0 | 0 | 1 | 0 | 0 | 145 | 7.5 | 135 |
| 0 | 0 | 0 | 1 | 0 | 0 | 146 | 7.5 | 135 |
| 0 | 0 | 0 | 1 | 0 | 0 | 147 | 7.5 | 135 |
| 0 | 0 | 0 | 1 | 0 | 0 | 148 | 7.5 | 135 |
| 0 | 0 | 0 | 1 | 0 | 0 | 149 | 7.5 | 135 |
| 0 | 0 | 0 | 1 | 0 | 0 | 150 | 7.5 | 150 |
| 0 | 0 | 0 | 1 | 0 | 0 | 151 | 7.5 | 165 |
| 0 | 0 | 0 | 1 | 0 | 0 | 152 | 7.5 | 165 |
| 0 | 0 | 0 | 1 | 0 | 0 | 153 | 7.5 | 165 |
| 0 | 0 | 0 | 1 | 0 | 0 | 154 | 7.5 | 165 |
| 0 | 0 | 0 | 1 | 0 | 0 | 155 | 7.5 | 165 |
| 0 | 0 | 0 | 1 | 0 | 0 | 156 | 7.5 | 165 |
| 0 | 0 | 0 | 1 | 0 | 0 | 157 | 7.5 | 165 |
| 0 | 0 | 0 | 1 | 0 | 0 | 158 | 7.5 | 165 |
| 0 | 0 | 0 | 1 | 0 | 0 | 159 | 7.5 | 165 |
| 0 | 0 | 0 | 1 | 0 | 0 | 160 | 7.5 | 165 |
| 0 | 0 | 0 | 1 | 0 | 0 | 161 | 7.5 | 165 |
| 0 | 0 | 0 | 1 | 0 | 0 | 162 | 7.5 | 165 |
| 0 | 0 | 0 | 1 | 0 | 0 | 163 | 7.5 | 165 |
| 0 | 0 | 0 | 1 | 0 | 0 | 164 | 7.5 | 165 |
| 0 | 0 | 0 | 1 | 0 | 0 | 165 | 7.5 | 165 |
| 0 | 0 | 0 | 1 | 0 | 0 | 166 | 7.5 | 165 |
| 0 | 0 | 0 | 1 | 0 | 0 | 167 | 7.5 | 165 |
| 0 | 0 | 0 | 1 | 0 | 0 | 168 | 7.5 | 165 |
| 0 | 0 | 0 | 1 | 0 | 0 | 169 | 7.5 | 165 |
| 0 | 0 | 0 | 1 | 0 | 0 | 170 | 7.5 | 165 |
| 0 | 0 | 0 | 1 | 0 | 0 | 171 | 7.5 | 165 |
| 0 | 0 | 0 | 1 | 0 | 0 | 172 | 7.5 | 165 |
| 0 | 0 | 0 | 1 | 0 | 0 | 173 | 7.5 | 165 |
| 0 | 0 | 0 | 1 | 0 | 0 | 174 | 7.5 | 165 |
| 0 | 0 | 0 | 1 | 0 | 0 | 175 | 7.5 | 165 |
| 0 | 0 | 0 | 1 | 0 | 0 | 176 | 7.5 | 165 |
| 0 | 0 | 0 | 1 | 0 | 0 | 177 | 7.5 | 165 |
| 0 | 0 | 0 | 1 | 0 | 0 | 178 | 7.5 | 165 |
| 0 | 0 | 0 | 1 | 0 | 0 | 179 | 7.5 | 165 |
| 0 | 0 | 0 | 1 | 0 | 0 | 180 | 7.5 | 180 |
| 0 | 0 | 0 | 0 | 1 | 0 | 0   | 7.5 | 0   |
| 0 | 0 | 0 | 0 | 1 | 0 | 1   | 7.5 | 15  |
| 0 | 0 | 0 | 0 | 1 | 0 | 2   | 7.5 | 15  |
| 0 | 0 | 0 | 0 | 1 | 0 | 3   | 7.5 | 15  |
| 0 | 0 | 0 | 0 | 1 | 0 | 4   | 7.5 | 15  |
| 0 | 0 | 0 | 0 | 1 | 0 | 5   | 7.5 | 15  |

|   |   |   |   |   |   |    |     |    |
|---|---|---|---|---|---|----|-----|----|
| 0 | 0 | 0 | 0 | 1 | 0 | 6  | 7.5 | 15 |
| 0 | 0 | 0 | 0 | 1 | 0 | 7  | 7.5 | 15 |
| 0 | 0 | 0 | 0 | 1 | 0 | 8  | 7.5 | 15 |
| 0 | 0 | 0 | 0 | 1 | 0 | 9  | 7.5 | 15 |
| 0 | 0 | 0 | 0 | 1 | 0 | 10 | 7.5 | 15 |
| 0 | 0 | 0 | 0 | 1 | 0 | 11 | 7.5 | 15 |
| 0 | 0 | 0 | 0 | 1 | 0 | 12 | 7.5 | 15 |
| 0 | 0 | 0 | 0 | 1 | 0 | 13 | 7.5 | 15 |
| 0 | 0 | 0 | 0 | 1 | 0 | 14 | 7.5 | 15 |
| 0 | 0 | 0 | 0 | 1 | 0 | 15 | 7.5 | 15 |
| 0 | 0 | 0 | 0 | 1 | 0 | 16 | 7.5 | 15 |
| 0 | 0 | 0 | 0 | 1 | 0 | 17 | 7.5 | 15 |
| 0 | 0 | 0 | 0 | 1 | 0 | 18 | 7.5 | 15 |
| 0 | 0 | 0 | 0 | 1 | 0 | 19 | 7.5 | 15 |
| 0 | 0 | 0 | 0 | 1 | 0 | 20 | 7.5 | 15 |
| 0 | 0 | 0 | 0 | 1 | 0 | 21 | 7.5 | 15 |
| 0 | 0 | 0 | 0 | 1 | 0 | 22 | 7.5 | 15 |
| 0 | 0 | 0 | 0 | 1 | 0 | 23 | 7.5 | 15 |
| 0 | 0 | 0 | 0 | 1 | 0 | 24 | 7.5 | 15 |
| 0 | 0 | 0 | 0 | 1 | 0 | 25 | 7.5 | 15 |
| 0 | 0 | 0 | 0 | 1 | 0 | 26 | 7.5 | 15 |
| 0 | 0 | 0 | 0 | 1 | 0 | 27 | 7.5 | 15 |
| 0 | 0 | 0 | 0 | 1 | 0 | 28 | 7.5 | 15 |
| 0 | 0 | 0 | 0 | 1 | 0 | 29 | 7.5 | 15 |
| 0 | 0 | 0 | 0 | 1 | 0 | 30 | 7.5 | 30 |
| 0 | 0 | 0 | 0 | 1 | 0 | 31 | 7.5 | 45 |
| 0 | 0 | 0 | 0 | 1 | 0 | 32 | 7.5 | 45 |
| 0 | 0 | 0 | 0 | 1 | 0 | 33 | 7.5 | 45 |
| 0 | 0 | 0 | 0 | 1 | 0 | 34 | 7.5 | 45 |
| 0 | 0 | 0 | 0 | 1 | 0 | 35 | 7.5 | 45 |
| 0 | 0 | 0 | 0 | 1 | 0 | 36 | 7.5 | 45 |
| 0 | 0 | 0 | 0 | 1 | 0 | 37 | 7.5 | 45 |
| 0 | 0 | 0 | 0 | 1 | 0 | 38 | 7.5 | 45 |
| 0 | 0 | 0 | 0 | 1 | 0 | 39 | 7.5 | 45 |
| 0 | 0 | 0 | 0 | 1 | 0 | 40 | 7.5 | 45 |
| 0 | 0 | 0 | 0 | 1 | 0 | 41 | 7.5 | 45 |
| 0 | 0 | 0 | 0 | 1 | 0 | 42 | 7.5 | 45 |
| 0 | 0 | 0 | 0 | 1 | 0 | 43 | 7.5 | 45 |
| 0 | 0 | 0 | 0 | 1 | 0 | 44 | 7.5 | 45 |
| 0 | 0 | 0 | 0 | 1 | 0 | 45 | 7.5 | 45 |
| 0 | 0 | 0 | 0 | 1 | 0 | 46 | 7.5 | 45 |
| 0 | 0 | 0 | 0 | 1 | 0 | 47 | 7.5 | 45 |
| 0 | 0 | 0 | 0 | 1 | 0 | 48 | 7.5 | 45 |
| 0 | 0 | 0 | 0 | 1 | 0 | 49 | 7.5 | 45 |
| 0 | 0 | 0 | 0 | 1 | 0 | 50 | 7.5 | 45 |
| 0 | 0 | 0 | 0 | 1 | 0 | 51 | 7.5 | 45 |

|   |   |   |   |   |   |    |     |     |
|---|---|---|---|---|---|----|-----|-----|
| 0 | 0 | 0 | 0 | 1 | 0 | 52 | 7.5 | 45  |
| 0 | 0 | 0 | 0 | 1 | 0 | 53 | 7.5 | 45  |
| 0 | 0 | 0 | 0 | 1 | 0 | 54 | 7.5 | 45  |
| 0 | 0 | 0 | 0 | 1 | 0 | 55 | 7.5 | 45  |
| 0 | 0 | 0 | 0 | 1 | 0 | 56 | 7.5 | 45  |
| 0 | 0 | 0 | 0 | 1 | 0 | 57 | 7.5 | 45  |
| 0 | 0 | 0 | 0 | 1 | 0 | 58 | 7.5 | 45  |
| 0 | 0 | 0 | 0 | 1 | 0 | 59 | 7.5 | 45  |
| 0 | 0 | 0 | 0 | 1 | 0 | 60 | 7.5 | 60  |
| 0 | 0 | 0 | 0 | 1 | 0 | 61 | 7.5 | 75  |
| 0 | 0 | 0 | 0 | 1 | 0 | 62 | 7.5 | 75  |
| 0 | 0 | 0 | 0 | 1 | 0 | 63 | 7.5 | 75  |
| 0 | 0 | 0 | 0 | 1 | 0 | 64 | 7.5 | 75  |
| 0 | 0 | 0 | 0 | 1 | 0 | 65 | 7.5 | 75  |
| 0 | 0 | 0 | 0 | 1 | 0 | 66 | 7.5 | 75  |
| 0 | 0 | 0 | 0 | 1 | 0 | 67 | 7.5 | 75  |
| 0 | 0 | 0 | 0 | 1 | 0 | 68 | 7.5 | 75  |
| 0 | 0 | 0 | 0 | 1 | 0 | 69 | 7.5 | 75  |
| 0 | 0 | 0 | 0 | 1 | 0 | 70 | 7.5 | 75  |
| 0 | 0 | 0 | 0 | 1 | 0 | 71 | 7.5 | 75  |
| 0 | 0 | 0 | 0 | 1 | 0 | 72 | 7.5 | 75  |
| 0 | 0 | 0 | 0 | 1 | 0 | 73 | 7.5 | 75  |
| 0 | 0 | 0 | 0 | 1 | 0 | 74 | 7.5 | 75  |
| 0 | 0 | 0 | 0 | 1 | 0 | 75 | 7.5 | 75  |
| 0 | 0 | 0 | 0 | 1 | 0 | 76 | 7.5 | 75  |
| 0 | 0 | 0 | 0 | 1 | 0 | 77 | 7.5 | 75  |
| 0 | 0 | 0 | 0 | 1 | 0 | 78 | 7.5 | 75  |
| 0 | 0 | 0 | 0 | 1 | 0 | 79 | 7.5 | 75  |
| 0 | 0 | 0 | 0 | 1 | 0 | 80 | 7.5 | 75  |
| 0 | 0 | 0 | 0 | 1 | 0 | 81 | 7.5 | 75  |
| 0 | 0 | 0 | 0 | 1 | 0 | 82 | 7.5 | 75  |
| 0 | 0 | 0 | 0 | 1 | 0 | 83 | 7.5 | 75  |
| 0 | 0 | 0 | 0 | 1 | 0 | 84 | 7.5 | 75  |
| 0 | 0 | 0 | 0 | 1 | 0 | 85 | 7.5 | 75  |
| 0 | 0 | 0 | 0 | 1 | 0 | 86 | 7.5 | 75  |
| 0 | 0 | 0 | 0 | 1 | 0 | 87 | 7.5 | 75  |
| 0 | 0 | 0 | 0 | 1 | 0 | 88 | 7.5 | 75  |
| 0 | 0 | 0 | 0 | 1 | 0 | 89 | 7.5 | 75  |
| 0 | 0 | 0 | 0 | 1 | 0 | 90 | 7.5 | 90  |
| 0 | 0 | 0 | 0 | 1 | 0 | 91 | 7.5 | 105 |
| 0 | 0 | 0 | 0 | 1 | 0 | 92 | 7.5 | 105 |
| 0 | 0 | 0 | 0 | 1 | 0 | 93 | 7.5 | 105 |
| 0 | 0 | 0 | 0 | 1 | 0 | 94 | 7.5 | 105 |
| 0 | 0 | 0 | 0 | 1 | 0 | 95 | 7.5 | 105 |
| 0 | 0 | 0 | 0 | 1 | 0 | 96 | 7.5 | 105 |
| 0 | 0 | 0 | 0 | 1 | 0 | 97 | 7.5 | 105 |

|   |   |   |   |   |   |     |     |     |
|---|---|---|---|---|---|-----|-----|-----|
| 0 | 0 | 0 | 0 | 1 | 0 | 98  | 7.5 | 105 |
| 0 | 0 | 0 | 0 | 1 | 0 | 99  | 7.5 | 105 |
| 0 | 0 | 0 | 0 | 1 | 0 | 100 | 7.5 | 105 |
| 0 | 0 | 0 | 0 | 1 | 0 | 101 | 7.5 | 105 |
| 0 | 0 | 0 | 0 | 1 | 0 | 102 | 7.5 | 105 |
| 0 | 0 | 0 | 0 | 1 | 0 | 103 | 7.5 | 105 |
| 0 | 0 | 0 | 0 | 1 | 0 | 104 | 7.5 | 105 |
| 0 | 0 | 0 | 0 | 1 | 0 | 105 | 7.5 | 105 |
| 0 | 0 | 0 | 0 | 1 | 0 | 106 | 7.5 | 105 |
| 0 | 0 | 0 | 0 | 1 | 0 | 107 | 7.5 | 105 |
| 0 | 0 | 0 | 0 | 1 | 0 | 108 | 7.5 | 105 |
| 0 | 0 | 0 | 0 | 1 | 0 | 109 | 7.5 | 105 |
| 0 | 0 | 0 | 0 | 1 | 0 | 110 | 7.5 | 105 |
| 0 | 0 | 0 | 0 | 1 | 0 | 111 | 7.5 | 105 |
| 0 | 0 | 0 | 0 | 1 | 0 | 112 | 7.5 | 105 |
| 0 | 0 | 0 | 0 | 1 | 0 | 113 | 7.5 | 105 |
| 0 | 0 | 0 | 0 | 1 | 0 | 114 | 7.5 | 105 |
| 0 | 0 | 0 | 0 | 1 | 0 | 115 | 7.5 | 105 |
| 0 | 0 | 0 | 0 | 1 | 0 | 116 | 7.5 | 105 |
| 0 | 0 | 0 | 0 | 1 | 0 | 117 | 7.5 | 105 |
| 0 | 0 | 0 | 0 | 1 | 0 | 118 | 7.5 | 105 |
| 0 | 0 | 0 | 0 | 1 | 0 | 119 | 7.5 | 105 |
| 0 | 0 | 0 | 0 | 1 | 0 | 120 | 7.5 | 105 |
| 0 | 0 | 0 | 0 | 1 | 0 | 121 | 7.5 | 105 |
| 0 | 0 | 0 | 0 | 1 | 0 | 122 | 7.5 | 105 |
| 0 | 0 | 0 | 0 | 1 | 0 | 123 | 7.5 | 105 |
| 0 | 0 | 0 | 0 | 1 | 0 | 124 | 7.5 | 105 |
| 0 | 0 | 0 | 0 | 1 | 0 | 125 | 7.5 | 105 |
| 0 | 0 | 0 | 0 | 1 | 0 | 126 | 7.5 | 105 |
| 0 | 0 | 0 | 0 | 1 | 0 | 127 | 7.5 | 105 |
| 0 | 0 | 0 | 0 | 1 | 0 | 128 | 7.5 | 105 |
| 0 | 0 | 0 | 0 | 1 | 0 | 129 | 7.5 | 105 |
| 0 | 0 | 0 | 0 | 1 | 0 | 130 | 7.5 | 105 |
| 0 | 0 | 0 | 0 | 1 | 0 | 131 | 7.5 | 105 |
| 0 | 0 | 0 | 0 | 1 | 0 | 132 | 7.5 | 105 |
| 0 | 0 | 0 | 0 | 1 | 0 | 133 | 7.5 | 105 |
| 0 | 0 | 0 | 0 | 1 | 0 | 134 | 7.5 | 105 |
| 0 | 0 | 0 | 0 | 1 | 0 | 135 | 7.5 | 105 |
| 0 | 0 | 0 | 0 | 1 | 0 | 136 | 7.5 | 165 |
| 0 | 0 | 0 | 0 | 1 | 0 | 137 | 7.5 | 165 |
| 0 | 0 | 0 | 0 | 1 | 0 | 138 | 7.5 | 165 |
| 0 | 0 | 0 | 0 | 1 | 0 | 139 | 7.5 | 165 |
| 0 | 0 | 0 | 0 | 1 | 0 | 140 | 7.5 | 165 |
| 0 | 0 | 0 | 0 | 1 | 0 | 141 | 7.5 | 165 |
| 0 | 0 | 0 | 0 | 1 | 0 | 142 | 7.5 | 165 |
| 0 | 0 | 0 | 0 | 1 | 0 | 143 | 7.5 | 165 |

|   |   |   |   |   |   |     |     |     |
|---|---|---|---|---|---|-----|-----|-----|
| 0 | 0 | 0 | 0 | 1 | 0 | 144 | 7.5 | 165 |
| 0 | 0 | 0 | 0 | 1 | 0 | 145 | 7.5 | 165 |
| 0 | 0 | 0 | 0 | 1 | 0 | 146 | 7.5 | 165 |
| 0 | 0 | 0 | 0 | 1 | 0 | 147 | 7.5 | 165 |
| 0 | 0 | 0 | 0 | 1 | 0 | 148 | 7.5 | 165 |
| 0 | 0 | 0 | 0 | 1 | 0 | 149 | 7.5 | 165 |
| 0 | 0 | 0 | 0 | 1 | 0 | 150 | 7.5 | 165 |
| 0 | 0 | 0 | 0 | 1 | 0 | 151 | 7.5 | 165 |
| 0 | 0 | 0 | 0 | 1 | 0 | 152 | 7.5 | 165 |
| 0 | 0 | 0 | 0 | 1 | 0 | 153 | 7.5 | 165 |
| 0 | 0 | 0 | 0 | 1 | 0 | 154 | 7.5 | 165 |
| 0 | 0 | 0 | 0 | 1 | 0 | 155 | 7.5 | 165 |
| 0 | 0 | 0 | 0 | 1 | 0 | 156 | 7.5 | 165 |
| 0 | 0 | 0 | 0 | 1 | 0 | 157 | 7.5 | 165 |
| 0 | 0 | 0 | 0 | 1 | 0 | 158 | 7.5 | 165 |
| 0 | 0 | 0 | 0 | 1 | 0 | 159 | 7.5 | 165 |
| 0 | 0 | 0 | 0 | 1 | 0 | 160 | 7.5 | 165 |
| 0 | 0 | 0 | 0 | 1 | 0 | 161 | 7.5 | 165 |
| 0 | 0 | 0 | 0 | 1 | 0 | 162 | 7.5 | 165 |
| 0 | 0 | 0 | 0 | 1 | 0 | 163 | 7.5 | 165 |
| 0 | 0 | 0 | 0 | 1 | 0 | 164 | 7.5 | 165 |
| 0 | 0 | 0 | 0 | 1 | 0 | 165 | 7.5 | 165 |
| 0 | 0 | 0 | 0 | 1 | 0 | 166 | 7.5 | 165 |
| 0 | 0 | 0 | 0 | 1 | 0 | 167 | 7.5 | 165 |
| 0 | 0 | 0 | 0 | 1 | 0 | 168 | 7.5 | 165 |
| 0 | 0 | 0 | 0 | 1 | 0 | 169 | 7.5 | 165 |
| 0 | 0 | 0 | 0 | 1 | 0 | 170 | 7.5 | 165 |
| 0 | 0 | 0 | 0 | 1 | 0 | 171 | 7.5 | 165 |
| 0 | 0 | 0 | 0 | 1 | 0 | 172 | 7.5 | 165 |
| 0 | 0 | 0 | 0 | 1 | 0 | 173 | 7.5 | 165 |
| 0 | 0 | 0 | 0 | 1 | 0 | 174 | 7.5 | 165 |
| 0 | 0 | 0 | 0 | 1 | 0 | 175 | 7.5 | 165 |
| 0 | 0 | 0 | 0 | 1 | 0 | 176 | 7.5 | 165 |
| 0 | 0 | 0 | 0 | 1 | 0 | 177 | 7.5 | 165 |
| 0 | 0 | 0 | 0 | 1 | 0 | 178 | 7.5 | 165 |
| 0 | 0 | 0 | 0 | 1 | 0 | 179 | 7.5 | 165 |
| 0 | 0 | 0 | 0 | 1 | 0 | 180 | 7.5 | 180 |
| 0 | 0 | 0 | 0 | 0 | 1 | 0   | 7.5 | 0   |
| 0 | 0 | 0 | 0 | 0 | 1 | 1   | 7.5 | 15  |
| 0 | 0 | 0 | 0 | 0 | 1 | 2   | 7.5 | 15  |
| 0 | 0 | 0 | 0 | 0 | 1 | 3   | 7.5 | 15  |
| 0 | 0 | 0 | 0 | 0 | 1 | 4   | 7.5 | 15  |
| 0 | 0 | 0 | 0 | 0 | 1 | 5   | 7.5 | 15  |
| 0 | 0 | 0 | 0 | 0 | 1 | 6   | 7.5 | 15  |
| 0 | 0 | 0 | 0 | 0 | 1 | 7   | 7.5 | 15  |
| 0 | 0 | 0 | 0 | 0 | 1 | 8   | 7.5 | 15  |

|   |   |   |   |   |   |    |     |    |
|---|---|---|---|---|---|----|-----|----|
| 0 | 0 | 0 | 0 | 0 | 1 | 9  | 7.5 | 15 |
| 0 | 0 | 0 | 0 | 0 | 1 | 10 | 7.5 | 15 |
| 0 | 0 | 0 | 0 | 0 | 1 | 11 | 7.5 | 15 |
| 0 | 0 | 0 | 0 | 0 | 1 | 12 | 7.5 | 15 |
| 0 | 0 | 0 | 0 | 0 | 1 | 13 | 7.5 | 15 |
| 0 | 0 | 0 | 0 | 0 | 1 | 14 | 7.5 | 15 |
| 0 | 0 | 0 | 0 | 0 | 1 | 15 | 7.5 | 15 |
| 0 | 0 | 0 | 0 | 0 | 1 | 16 | 7.5 | 15 |
| 0 | 0 | 0 | 0 | 0 | 1 | 17 | 7.5 | 15 |
| 0 | 0 | 0 | 0 | 0 | 1 | 18 | 7.5 | 15 |
| 0 | 0 | 0 | 0 | 0 | 1 | 19 | 7.5 | 15 |
| 0 | 0 | 0 | 0 | 0 | 1 | 20 | 7.5 | 15 |
| 0 | 0 | 0 | 0 | 0 | 1 | 21 | 7.5 | 15 |
| 0 | 0 | 0 | 0 | 0 | 1 | 22 | 7.5 | 15 |
| 0 | 0 | 0 | 0 | 0 | 1 | 23 | 7.5 | 15 |
| 0 | 0 | 0 | 0 | 0 | 1 | 24 | 7.5 | 15 |
| 0 | 0 | 0 | 0 | 0 | 1 | 25 | 7.5 | 15 |
| 0 | 0 | 0 | 0 | 0 | 1 | 26 | 7.5 | 15 |
| 0 | 0 | 0 | 0 | 0 | 1 | 27 | 7.5 | 15 |
| 0 | 0 | 0 | 0 | 0 | 1 | 28 | 7.5 | 15 |
| 0 | 0 | 0 | 0 | 0 | 1 | 29 | 7.5 | 15 |
| 0 | 0 | 0 | 0 | 0 | 1 | 30 | 7.5 | 30 |
| 0 | 0 | 0 | 0 | 0 | 1 | 31 | 7.5 | 45 |
| 0 | 0 | 0 | 0 | 0 | 1 | 32 | 7.5 | 45 |
| 0 | 0 | 0 | 0 | 0 | 1 | 33 | 7.5 | 45 |
| 0 | 0 | 0 | 0 | 0 | 1 | 34 | 7.5 | 45 |
| 0 | 0 | 0 | 0 | 0 | 1 | 35 | 7.5 | 45 |
| 0 | 0 | 0 | 0 | 0 | 1 | 36 | 7.5 | 45 |
| 0 | 0 | 0 | 0 | 0 | 1 | 37 | 7.5 | 45 |
| 0 | 0 | 0 | 0 | 0 | 1 | 38 | 7.5 | 45 |
| 0 | 0 | 0 | 0 | 0 | 1 | 39 | 7.5 | 45 |
| 0 | 0 | 0 | 0 | 0 | 1 | 40 | 7.5 | 45 |
| 0 | 0 | 0 | 0 | 0 | 1 | 41 | 7.5 | 45 |
| 0 | 0 | 0 | 0 | 0 | 1 | 42 | 7.5 | 45 |
| 0 | 0 | 0 | 0 | 0 | 1 | 43 | 7.5 | 45 |
| 0 | 0 | 0 | 0 | 0 | 1 | 44 | 7.5 | 45 |
| 0 | 0 | 0 | 0 | 0 | 1 | 45 | 7.5 | 45 |
| 0 | 0 | 0 | 0 | 0 | 1 | 46 | 7.5 | 45 |
| 0 | 0 | 0 | 0 | 0 | 1 | 47 | 7.5 | 45 |
| 0 | 0 | 0 | 0 | 0 | 1 | 48 | 7.5 | 45 |
| 0 | 0 | 0 | 0 | 0 | 1 | 49 | 7.5 | 45 |
| 0 | 0 | 0 | 0 | 0 | 1 | 50 | 7.5 | 45 |
| 0 | 0 | 0 | 0 | 0 | 1 | 51 | 7.5 | 45 |
| 0 | 0 | 0 | 0 | 0 | 1 | 52 | 7.5 | 45 |
| 0 | 0 | 0 | 0 | 0 | 1 | 53 | 7.5 | 45 |
| 0 | 0 | 0 | 0 | 0 | 1 | 54 | 7.5 | 45 |

|   |   |   |   |   |   |     |     |     |
|---|---|---|---|---|---|-----|-----|-----|
| 0 | 0 | 0 | 0 | 0 | 1 | 55  | 7.5 | 45  |
| 0 | 0 | 0 | 0 | 0 | 1 | 56  | 7.5 | 45  |
| 0 | 0 | 0 | 0 | 0 | 1 | 57  | 7.5 | 45  |
| 0 | 0 | 0 | 0 | 0 | 1 | 58  | 7.5 | 45  |
| 0 | 0 | 0 | 0 | 0 | 1 | 59  | 7.5 | 45  |
| 0 | 0 | 0 | 0 | 0 | 1 | 60  | 7.5 | 60  |
| 0 | 0 | 0 | 0 | 0 | 1 | 61  | 7.5 | 75  |
| 0 | 0 | 0 | 0 | 0 | 1 | 62  | 7.5 | 75  |
| 0 | 0 | 0 | 0 | 0 | 1 | 63  | 7.5 | 75  |
| 0 | 0 | 0 | 0 | 0 | 1 | 64  | 7.5 | 75  |
| 0 | 0 | 0 | 0 | 0 | 1 | 65  | 7.5 | 75  |
| 0 | 0 | 0 | 0 | 0 | 1 | 66  | 7.5 | 75  |
| 0 | 0 | 0 | 0 | 0 | 1 | 67  | 7.5 | 75  |
| 0 | 0 | 0 | 0 | 0 | 1 | 68  | 7.5 | 75  |
| 0 | 0 | 0 | 0 | 0 | 1 | 69  | 7.5 | 75  |
| 0 | 0 | 0 | 0 | 0 | 1 | 70  | 7.5 | 75  |
| 0 | 0 | 0 | 0 | 0 | 1 | 71  | 7.5 | 75  |
| 0 | 0 | 0 | 0 | 0 | 1 | 72  | 7.5 | 75  |
| 0 | 0 | 0 | 0 | 0 | 1 | 73  | 7.5 | 75  |
| 0 | 0 | 0 | 0 | 0 | 1 | 74  | 7.5 | 75  |
| 0 | 0 | 0 | 0 | 0 | 1 | 75  | 7.5 | 75  |
| 0 | 0 | 0 | 0 | 0 | 1 | 76  | 7.5 | 75  |
| 0 | 0 | 0 | 0 | 0 | 1 | 77  | 7.5 | 75  |
| 0 | 0 | 0 | 0 | 0 | 1 | 78  | 7.5 | 75  |
| 0 | 0 | 0 | 0 | 0 | 1 | 79  | 7.5 | 75  |
| 0 | 0 | 0 | 0 | 0 | 1 | 80  | 7.5 | 75  |
| 0 | 0 | 0 | 0 | 0 | 1 | 81  | 7.5 | 75  |
| 0 | 0 | 0 | 0 | 0 | 1 | 82  | 7.5 | 75  |
| 0 | 0 | 0 | 0 | 0 | 1 | 83  | 7.5 | 75  |
| 0 | 0 | 0 | 0 | 0 | 1 | 84  | 7.5 | 75  |
| 0 | 0 | 0 | 0 | 0 | 1 | 85  | 7.5 | 75  |
| 0 | 0 | 0 | 0 | 0 | 1 | 86  | 7.5 | 75  |
| 0 | 0 | 0 | 0 | 0 | 1 | 87  | 7.5 | 75  |
| 0 | 0 | 0 | 0 | 0 | 1 | 88  | 7.5 | 75  |
| 0 | 0 | 0 | 0 | 0 | 1 | 89  | 7.5 | 75  |
| 0 | 0 | 0 | 0 | 0 | 1 | 90  | 7.5 | 90  |
| 0 | 0 | 0 | 0 | 0 | 1 | 91  | 7.5 | 105 |
| 0 | 0 | 0 | 0 | 0 | 1 | 92  | 7.5 | 105 |
| 0 | 0 | 0 | 0 | 0 | 1 | 93  | 7.5 | 105 |
| 0 | 0 | 0 | 0 | 0 | 1 | 94  | 7.5 | 105 |
| 0 | 0 | 0 | 0 | 0 | 1 | 95  | 7.5 | 105 |
| 0 | 0 | 0 | 0 | 0 | 1 | 96  | 7.5 | 105 |
| 0 | 0 | 0 | 0 | 0 | 1 | 97  | 7.5 | 105 |
| 0 | 0 | 0 | 0 | 0 | 1 | 98  | 7.5 | 105 |
| 0 | 0 | 0 | 0 | 0 | 1 | 99  | 7.5 | 105 |
| 0 | 0 | 0 | 0 | 0 | 1 | 100 | 7.5 | 105 |

|   |   |   |   |   |   |     |     |     |
|---|---|---|---|---|---|-----|-----|-----|
| 0 | 0 | 0 | 0 | 0 | 1 | 101 | 7.5 | 105 |
| 0 | 0 | 0 | 0 | 0 | 1 | 102 | 7.5 | 105 |
| 0 | 0 | 0 | 0 | 0 | 1 | 103 | 7.5 | 105 |
| 0 | 0 | 0 | 0 | 0 | 1 | 104 | 7.5 | 105 |
| 0 | 0 | 0 | 0 | 0 | 1 | 105 | 7.5 | 105 |
| 0 | 0 | 0 | 0 | 0 | 1 | 106 | 7.5 | 105 |
| 0 | 0 | 0 | 0 | 0 | 1 | 107 | 7.5 | 105 |
| 0 | 0 | 0 | 0 | 0 | 1 | 108 | 7.5 | 105 |
| 0 | 0 | 0 | 0 | 0 | 1 | 109 | 7.5 | 105 |
| 0 | 0 | 0 | 0 | 0 | 1 | 110 | 7.5 | 105 |
| 0 | 0 | 0 | 0 | 0 | 1 | 111 | 7.5 | 105 |
| 0 | 0 | 0 | 0 | 0 | 1 | 112 | 7.5 | 105 |
| 0 | 0 | 0 | 0 | 0 | 1 | 113 | 7.5 | 105 |
| 0 | 0 | 0 | 0 | 0 | 1 | 114 | 7.5 | 105 |
| 0 | 0 | 0 | 0 | 0 | 1 | 115 | 7.5 | 105 |
| 0 | 0 | 0 | 0 | 0 | 1 | 116 | 7.5 | 105 |
| 0 | 0 | 0 | 0 | 0 | 1 | 117 | 7.5 | 105 |
| 0 | 0 | 0 | 0 | 0 | 1 | 118 | 7.5 | 105 |
| 0 | 0 | 0 | 0 | 0 | 1 | 119 | 7.5 | 105 |
| 0 | 0 | 0 | 0 | 0 | 1 | 120 | 7.5 | 120 |
| 0 | 0 | 0 | 0 | 0 | 1 | 121 | 7.5 | 135 |
| 0 | 0 | 0 | 0 | 0 | 1 | 122 | 7.5 | 135 |
| 0 | 0 | 0 | 0 | 0 | 1 | 123 | 7.5 | 135 |
| 0 | 0 | 0 | 0 | 0 | 1 | 124 | 7.5 | 135 |
| 0 | 0 | 0 | 0 | 0 | 1 | 125 | 7.5 | 135 |
| 0 | 0 | 0 | 0 | 0 | 1 | 126 | 7.5 | 135 |
| 0 | 0 | 0 | 0 | 0 | 1 | 127 | 7.5 | 135 |
| 0 | 0 | 0 | 0 | 0 | 1 | 128 | 7.5 | 135 |
| 0 | 0 | 0 | 0 | 0 | 1 | 129 | 7.5 | 135 |
| 0 | 0 | 0 | 0 | 0 | 1 | 130 | 7.5 | 135 |
| 0 | 0 | 0 | 0 | 0 | 1 | 131 | 7.5 | 135 |
| 0 | 0 | 0 | 0 | 0 | 1 | 132 | 7.5 | 135 |
| 0 | 0 | 0 | 0 | 0 | 1 | 133 | 7.5 | 135 |
| 0 | 0 | 0 | 0 | 0 | 1 | 134 | 7.5 | 135 |
| 0 | 0 | 0 | 0 | 0 | 1 | 135 | 7.5 | 135 |
| 0 | 0 | 0 | 0 | 0 | 1 | 136 | 7.5 | 135 |
| 0 | 0 | 0 | 0 | 0 | 1 | 137 | 7.5 | 135 |
| 0 | 0 | 0 | 0 | 0 | 1 | 138 | 7.5 | 135 |
| 0 | 0 | 0 | 0 | 0 | 1 | 139 | 7.5 | 135 |
| 0 | 0 | 0 | 0 | 0 | 1 | 140 | 7.5 | 135 |
| 0 | 0 | 0 | 0 | 0 | 1 | 141 | 7.5 | 135 |
| 0 | 0 | 0 | 0 | 0 | 1 | 142 | 7.5 | 135 |
| 0 | 0 | 0 | 0 | 0 | 1 | 143 | 7.5 | 135 |
| 0 | 0 | 0 | 0 | 0 | 1 | 144 | 7.5 | 135 |
| 0 | 0 | 0 | 0 | 0 | 1 | 145 | 7.5 | 135 |
| 0 | 0 | 0 | 0 | 0 | 1 | 146 | 7.5 | 135 |

|   |   |   |   |   |   |     |     |     |
|---|---|---|---|---|---|-----|-----|-----|
| 0 | 0 | 0 | 0 | 0 | 1 | 147 | 7.5 | 135 |
| 0 | 0 | 0 | 0 | 0 | 1 | 148 | 7.5 | 135 |
| 0 | 0 | 0 | 0 | 0 | 1 | 149 | 7.5 | 135 |
| 0 | 0 | 0 | 0 | 0 | 1 | 150 | 7.5 | 135 |
| 0 | 0 | 0 | 0 | 0 | 1 | 151 | 7.5 | 135 |
| 0 | 0 | 0 | 0 | 0 | 1 | 152 | 7.5 | 135 |
| 0 | 0 | 0 | 0 | 0 | 1 | 153 | 7.5 | 135 |
| 0 | 0 | 0 | 0 | 0 | 1 | 154 | 7.5 | 135 |
| 0 | 0 | 0 | 0 | 0 | 1 | 155 | 7.5 | 135 |
| 0 | 0 | 0 | 0 | 0 | 1 | 156 | 7.5 | 135 |
| 0 | 0 | 0 | 0 | 0 | 1 | 157 | 7.5 | 135 |
| 0 | 0 | 0 | 0 | 0 | 1 | 158 | 7.5 | 135 |
| 0 | 0 | 0 | 0 | 0 | 1 | 159 | 7.5 | 135 |
| 0 | 0 | 0 | 0 | 0 | 1 | 160 | 7.5 | 135 |
| 0 | 0 | 0 | 0 | 0 | 1 | 161 | 7.5 | 135 |
| 0 | 0 | 0 | 0 | 0 | 1 | 162 | 7.5 | 135 |
| 0 | 0 | 0 | 0 | 0 | 1 | 163 | 7.5 | 135 |
| 0 | 0 | 0 | 0 | 0 | 1 | 164 | 7.5 | 135 |
| 0 | 0 | 0 | 0 | 0 | 1 | 165 | 7.5 | 135 |
| 0 | 0 | 0 | 0 | 0 | 1 | 166 | 7.5 | 135 |
| 0 | 0 | 0 | 0 | 0 | 1 | 167 | 7.5 | 135 |
| 0 | 0 | 0 | 0 | 0 | 1 | 168 | 7.5 | 135 |
| 0 | 0 | 0 | 0 | 0 | 1 | 169 | 7.5 | 135 |
| 0 | 0 | 0 | 0 | 0 | 1 | 170 | 7.5 | 135 |
| 0 | 0 | 0 | 0 | 0 | 1 | 171 | 7.5 | 135 |
| 0 | 0 | 0 | 0 | 0 | 1 | 172 | 7.5 | 135 |
| 0 | 0 | 0 | 0 | 0 | 1 | 173 | 7.5 | 135 |
| 0 | 0 | 0 | 0 | 0 | 1 | 174 | 7.5 | 135 |
| 0 | 0 | 0 | 0 | 0 | 1 | 175 | 7.5 | 135 |
| 0 | 0 | 0 | 0 | 0 | 1 | 176 | 7.5 | 135 |
| 0 | 0 | 0 | 0 | 0 | 1 | 177 | 7.5 | 135 |
| 0 | 0 | 0 | 0 | 0 | 1 | 178 | 7.5 | 135 |
| 0 | 0 | 0 | 0 | 0 | 1 | 179 | 7.5 | 135 |
| 0 | 0 | 0 | 0 | 0 | 1 | 180 | 7.5 | 135 |
| 1 | 1 | 0 | 0 | 0 | 0 | 0   | 7.5 | 75  |
| 1 | 1 | 0 | 0 | 0 | 0 | 1   | 7.5 | 75  |
| 1 | 1 | 0 | 0 | 0 | 0 | 2   | 7.5 | 75  |
| 1 | 1 | 0 | 0 | 0 | 0 | 3   | 7.5 | 75  |
| 1 | 1 | 0 | 0 | 0 | 0 | 4   | 7.5 | 75  |
| 1 | 1 | 0 | 0 | 0 | 0 | 5   | 7.5 | 75  |
| 1 | 1 | 0 | 0 | 0 | 0 | 6   | 7.5 | 75  |
| 1 | 1 | 0 | 0 | 0 | 0 | 7   | 7.5 | 75  |
| 1 | 1 | 0 | 0 | 0 | 0 | 8   | 7.5 | 75  |
| 1 | 1 | 0 | 0 | 0 | 0 | 9   | 7.5 | 75  |
| 1 | 1 | 0 | 0 | 0 | 0 | 10  | 7.5 | 75  |
| 1 | 1 | 0 | 0 | 0 | 0 | 11  | 7.5 | 75  |

|   |   |   |   |   |   |    |     |    |
|---|---|---|---|---|---|----|-----|----|
| 1 | 1 | 0 | 0 | 0 | 0 | 12 | 7.5 | 75 |
| 1 | 1 | 0 | 0 | 0 | 0 | 13 | 7.5 | 75 |
| 1 | 1 | 0 | 0 | 0 | 0 | 14 | 7.5 | 75 |
| 1 | 1 | 0 | 0 | 0 | 0 | 15 | 7.5 | 75 |
| 1 | 1 | 0 | 0 | 0 | 0 | 16 | 7.5 | 75 |
| 1 | 1 | 0 | 0 | 0 | 0 | 17 | 7.5 | 75 |
| 1 | 1 | 0 | 0 | 0 | 0 | 18 | 7.5 | 75 |
| 1 | 1 | 0 | 0 | 0 | 0 | 19 | 7.5 | 75 |
| 1 | 1 | 0 | 0 | 0 | 0 | 20 | 7.5 | 75 |
| 1 | 1 | 0 | 0 | 0 | 0 | 21 | 7.5 | 75 |
| 1 | 1 | 0 | 0 | 0 | 0 | 22 | 7.5 | 75 |
| 1 | 1 | 0 | 0 | 0 | 0 | 23 | 7.5 | 75 |
| 1 | 1 | 0 | 0 | 0 | 0 | 24 | 7.5 | 75 |
| 1 | 1 | 0 | 0 | 0 | 0 | 25 | 7.5 | 75 |
| 1 | 1 | 0 | 0 | 0 | 0 | 26 | 7.5 | 75 |
| 1 | 1 | 0 | 0 | 0 | 0 | 27 | 7.5 | 75 |
| 1 | 1 | 0 | 0 | 0 | 0 | 28 | 7.5 | 75 |
| 1 | 1 | 0 | 0 | 0 | 0 | 29 | 7.5 | 75 |
| 1 | 1 | 0 | 0 | 0 | 0 | 30 | 7.5 | 75 |
| 1 | 1 | 0 | 0 | 0 | 0 | 31 | 7.5 | 75 |
| 1 | 1 | 0 | 0 | 0 | 0 | 32 | 7.5 | 75 |
| 1 | 1 | 0 | 0 | 0 | 0 | 33 | 7.5 | 75 |
| 1 | 1 | 0 | 0 | 0 | 0 | 34 | 7.5 | 75 |
| 1 | 1 | 0 | 0 | 0 | 0 | 35 | 7.5 | 75 |
| 1 | 1 | 0 | 0 | 0 | 0 | 36 | 7.5 | 75 |
| 1 | 1 | 0 | 0 | 0 | 0 | 37 | 7.5 | 75 |
| 1 | 1 | 0 | 0 | 0 | 0 | 38 | 7.5 | 75 |
| 1 | 1 | 0 | 0 | 0 | 0 | 39 | 7.5 | 75 |
| 1 | 1 | 0 | 0 | 0 | 0 | 40 | 7.5 | 75 |
| 1 | 1 | 0 | 0 | 0 | 0 | 41 | 7.5 | 75 |
| 1 | 1 | 0 | 0 | 0 | 0 | 42 | 7.5 | 75 |
| 1 | 1 | 0 | 0 | 0 | 0 | 43 | 7.5 | 75 |
| 1 | 1 | 0 | 0 | 0 | 0 | 44 | 7.5 | 75 |
| 1 | 1 | 0 | 0 | 0 | 0 | 45 | 7.5 | 75 |
| 1 | 1 | 0 | 0 | 0 | 0 | 46 | 7.5 | 75 |
| 1 | 1 | 0 | 0 | 0 | 0 | 47 | 7.5 | 75 |
| 1 | 1 | 0 | 0 | 0 | 0 | 48 | 7.5 | 75 |
| 1 | 1 | 0 | 0 | 0 | 0 | 49 | 7.5 | 75 |
| 1 | 1 | 0 | 0 | 0 | 0 | 50 | 7.5 | 75 |
| 1 | 1 | 0 | 0 | 0 | 0 | 51 | 7.5 | 75 |
| 1 | 1 | 0 | 0 | 0 | 0 | 52 | 7.5 | 75 |
| 1 | 1 | 0 | 0 | 0 | 0 | 53 | 7.5 | 75 |
| 1 | 1 | 0 | 0 | 0 | 0 | 54 | 7.5 | 75 |
| 1 | 1 | 0 | 0 | 0 | 0 | 55 | 7.5 | 75 |
| 1 | 1 | 0 | 0 | 0 | 0 | 56 | 7.5 | 75 |
| 1 | 1 | 0 | 0 | 0 | 0 | 57 | 7.5 | 75 |

|   |   |   |   |   |   |     |     |     |
|---|---|---|---|---|---|-----|-----|-----|
| 1 | 1 | 0 | 0 | 0 | 0 | 58  | 7.5 | 75  |
| 1 | 1 | 0 | 0 | 0 | 0 | 59  | 7.5 | 75  |
| 1 | 1 | 0 | 0 | 0 | 0 | 60  | 7.5 | 75  |
| 1 | 1 | 0 | 0 | 0 | 0 | 61  | 7.5 | 75  |
| 1 | 1 | 0 | 0 | 0 | 0 | 62  | 7.5 | 75  |
| 1 | 1 | 0 | 0 | 0 | 0 | 63  | 7.5 | 75  |
| 1 | 1 | 0 | 0 | 0 | 0 | 64  | 7.5 | 75  |
| 1 | 1 | 0 | 0 | 0 | 0 | 65  | 7.5 | 75  |
| 1 | 1 | 0 | 0 | 0 | 0 | 66  | 7.5 | 75  |
| 1 | 1 | 0 | 0 | 0 | 0 | 67  | 7.5 | 75  |
| 1 | 1 | 0 | 0 | 0 | 0 | 68  | 7.5 | 75  |
| 1 | 1 | 0 | 0 | 0 | 0 | 69  | 7.5 | 75  |
| 1 | 1 | 0 | 0 | 0 | 0 | 70  | 7.5 | 75  |
| 1 | 1 | 0 | 0 | 0 | 0 | 71  | 7.5 | 75  |
| 1 | 1 | 0 | 0 | 0 | 0 | 72  | 7.5 | 75  |
| 1 | 1 | 0 | 0 | 0 | 0 | 73  | 7.5 | 75  |
| 1 | 1 | 0 | 0 | 0 | 0 | 74  | 7.5 | 75  |
| 1 | 1 | 0 | 0 | 0 | 0 | 75  | 7.5 | 75  |
| 1 | 1 | 0 | 0 | 0 | 0 | 76  | 7.5 | 75  |
| 1 | 1 | 0 | 0 | 0 | 0 | 77  | 7.5 | 75  |
| 1 | 1 | 0 | 0 | 0 | 0 | 78  | 7.5 | 75  |
| 1 | 1 | 0 | 0 | 0 | 0 | 79  | 7.5 | 75  |
| 1 | 1 | 0 | 0 | 0 | 0 | 80  | 7.5 | 75  |
| 1 | 1 | 0 | 0 | 0 | 0 | 81  | 7.5 | 75  |
| 1 | 1 | 0 | 0 | 0 | 0 | 82  | 7.5 | 75  |
| 1 | 1 | 0 | 0 | 0 | 0 | 83  | 7.5 | 75  |
| 1 | 1 | 0 | 0 | 0 | 0 | 84  | 7.5 | 75  |
| 1 | 1 | 0 | 0 | 0 | 0 | 85  | 7.5 | 75  |
| 1 | 1 | 0 | 0 | 0 | 0 | 86  | 7.5 | 75  |
| 1 | 1 | 0 | 0 | 0 | 0 | 87  | 7.5 | 75  |
| 1 | 1 | 0 | 0 | 0 | 0 | 88  | 7.5 | 75  |
| 1 | 1 | 0 | 0 | 0 | 0 | 89  | 7.5 | 75  |
| 1 | 1 | 0 | 0 | 0 | 0 | 90  | 7.5 | 90  |
| 1 | 1 | 0 | 0 | 0 | 0 | 91  | 7.5 | 105 |
| 1 | 1 | 0 | 0 | 0 | 0 | 92  | 7.5 | 105 |
| 1 | 1 | 0 | 0 | 0 | 0 | 93  | 7.5 | 105 |
| 1 | 1 | 0 | 0 | 0 | 0 | 94  | 7.5 | 105 |
| 1 | 1 | 0 | 0 | 0 | 0 | 95  | 7.5 | 105 |
| 1 | 1 | 0 | 0 | 0 | 0 | 96  | 7.5 | 105 |
| 1 | 1 | 0 | 0 | 0 | 0 | 97  | 7.5 | 105 |
| 1 | 1 | 0 | 0 | 0 | 0 | 98  | 7.5 | 105 |
| 1 | 1 | 0 | 0 | 0 | 0 | 99  | 7.5 | 105 |
| 1 | 1 | 0 | 0 | 0 | 0 | 100 | 7.5 | 105 |
| 1 | 1 | 0 | 0 | 0 | 0 | 101 | 7.5 | 105 |
| 1 | 1 | 0 | 0 | 0 | 0 | 102 | 7.5 | 105 |
| 1 | 1 | 0 | 0 | 0 | 0 | 103 | 7.5 | 105 |

|   |   |   |   |   |   |     |     |     |
|---|---|---|---|---|---|-----|-----|-----|
| 1 | 1 | 0 | 0 | 0 | 0 | 104 | 7.5 | 105 |
| 1 | 1 | 0 | 0 | 0 | 0 | 105 | 7.5 | 105 |
| 1 | 1 | 0 | 0 | 0 | 0 | 106 | 7.5 | 105 |
| 1 | 1 | 0 | 0 | 0 | 0 | 107 | 7.5 | 105 |
| 1 | 1 | 0 | 0 | 0 | 0 | 108 | 7.5 | 105 |
| 1 | 1 | 0 | 0 | 0 | 0 | 109 | 7.5 | 105 |
| 1 | 1 | 0 | 0 | 0 | 0 | 110 | 7.5 | 105 |
| 1 | 1 | 0 | 0 | 0 | 0 | 111 | 7.5 | 105 |
| 1 | 1 | 0 | 0 | 0 | 0 | 112 | 7.5 | 105 |
| 1 | 1 | 0 | 0 | 0 | 0 | 113 | 7.5 | 105 |
| 1 | 1 | 0 | 0 | 0 | 0 | 114 | 7.5 | 105 |
| 1 | 1 | 0 | 0 | 0 | 0 | 115 | 7.5 | 105 |
| 1 | 1 | 0 | 0 | 0 | 0 | 116 | 7.5 | 105 |
| 1 | 1 | 0 | 0 | 0 | 0 | 117 | 7.5 | 105 |
| 1 | 1 | 0 | 0 | 0 | 0 | 118 | 7.5 | 105 |
| 1 | 1 | 0 | 0 | 0 | 0 | 119 | 7.5 | 105 |
| 1 | 1 | 0 | 0 | 0 | 0 | 120 | 7.5 | 120 |
| 1 | 1 | 0 | 0 | 0 | 0 | 121 | 7.5 | 135 |
| 1 | 1 | 0 | 0 | 0 | 0 | 122 | 7.5 | 135 |
| 1 | 1 | 0 | 0 | 0 | 0 | 123 | 7.5 | 135 |
| 1 | 1 | 0 | 0 | 0 | 0 | 124 | 7.5 | 135 |
| 1 | 1 | 0 | 0 | 0 | 0 | 125 | 7.5 | 135 |
| 1 | 1 | 0 | 0 | 0 | 0 | 126 | 7.5 | 135 |
| 1 | 1 | 0 | 0 | 0 | 0 | 127 | 7.5 | 135 |
| 1 | 1 | 0 | 0 | 0 | 0 | 128 | 7.5 | 135 |
| 1 | 1 | 0 | 0 | 0 | 0 | 129 | 7.5 | 135 |
| 1 | 1 | 0 | 0 | 0 | 0 | 130 | 7.5 | 135 |
| 1 | 1 | 0 | 0 | 0 | 0 | 131 | 7.5 | 135 |
| 1 | 1 | 0 | 0 | 0 | 0 | 132 | 7.5 | 135 |
| 1 | 1 | 0 | 0 | 0 | 0 | 133 | 7.5 | 135 |
| 1 | 1 | 0 | 0 | 0 | 0 | 134 | 7.5 | 135 |
| 1 | 1 | 0 | 0 | 0 | 0 | 135 | 7.5 | 135 |
| 1 | 1 | 0 | 0 | 0 | 0 | 136 | 7.5 | 135 |
| 1 | 1 | 0 | 0 | 0 | 0 | 137 | 7.5 | 135 |
| 1 | 1 | 0 | 0 | 0 | 0 | 138 | 7.5 | 135 |
| 1 | 1 | 0 | 0 | 0 | 0 | 139 | 7.5 | 135 |
| 1 | 1 | 0 | 0 | 0 | 0 | 140 | 7.5 | 135 |
| 1 | 1 | 0 | 0 | 0 | 0 | 141 | 7.5 | 135 |
| 1 | 1 | 0 | 0 | 0 | 0 | 142 | 7.5 | 135 |
| 1 | 1 | 0 | 0 | 0 | 0 | 143 | 7.5 | 135 |
| 1 | 1 | 0 | 0 | 0 | 0 | 144 | 7.5 | 135 |
| 1 | 1 | 0 | 0 | 0 | 0 | 145 | 7.5 | 135 |
| 1 | 1 | 0 | 0 | 0 | 0 | 146 | 7.5 | 135 |
| 1 | 1 | 0 | 0 | 0 | 0 | 147 | 7.5 | 135 |
| 1 | 1 | 0 | 0 | 0 | 0 | 148 | 7.5 | 135 |
| 1 | 1 | 0 | 0 | 0 | 0 | 149 | 7.5 | 135 |

|   |   |   |   |   |   |     |     |     |
|---|---|---|---|---|---|-----|-----|-----|
| 1 | 1 | 0 | 0 | 0 | 0 | 150 | 7.5 | 150 |
| 1 | 1 | 0 | 0 | 0 | 0 | 151 | 7.5 | 165 |
| 1 | 1 | 0 | 0 | 0 | 0 | 152 | 7.5 | 165 |
| 1 | 1 | 0 | 0 | 0 | 0 | 153 | 7.5 | 165 |
| 1 | 1 | 0 | 0 | 0 | 0 | 154 | 7.5 | 165 |
| 1 | 1 | 0 | 0 | 0 | 0 | 155 | 7.5 | 165 |
| 1 | 1 | 0 | 0 | 0 | 0 | 156 | 7.5 | 165 |
| 1 | 1 | 0 | 0 | 0 | 0 | 157 | 7.5 | 165 |
| 1 | 1 | 0 | 0 | 0 | 0 | 158 | 7.5 | 165 |
| 1 | 1 | 0 | 0 | 0 | 0 | 159 | 7.5 | 165 |
| 1 | 1 | 0 | 0 | 0 | 0 | 160 | 7.5 | 165 |
| 1 | 1 | 0 | 0 | 0 | 0 | 161 | 7.5 | 165 |
| 1 | 1 | 0 | 0 | 0 | 0 | 162 | 7.5 | 165 |
| 1 | 1 | 0 | 0 | 0 | 0 | 163 | 7.5 | 165 |
| 1 | 1 | 0 | 0 | 0 | 0 | 164 | 7.5 | 165 |
| 1 | 1 | 0 | 0 | 0 | 0 | 165 | 7.5 | 165 |
| 1 | 1 | 0 | 0 | 0 | 0 | 166 | 7.5 | 165 |
| 1 | 1 | 0 | 0 | 0 | 0 | 167 | 7.5 | 165 |
| 1 | 1 | 0 | 0 | 0 | 0 | 168 | 7.5 | 165 |
| 1 | 1 | 0 | 0 | 0 | 0 | 169 | 7.5 | 165 |
| 1 | 1 | 0 | 0 | 0 | 0 | 170 | 7.5 | 165 |
| 1 | 1 | 0 | 0 | 0 | 0 | 171 | 7.5 | 165 |
| 1 | 1 | 0 | 0 | 0 | 0 | 172 | 7.5 | 165 |
| 1 | 1 | 0 | 0 | 0 | 0 | 173 | 7.5 | 165 |
| 1 | 1 | 0 | 0 | 0 | 0 | 174 | 7.5 | 165 |
| 1 | 1 | 0 | 0 | 0 | 0 | 175 | 7.5 | 165 |
| 1 | 1 | 0 | 0 | 0 | 0 | 176 | 7.5 | 165 |
| 1 | 1 | 0 | 0 | 0 | 0 | 177 | 7.5 | 165 |
| 1 | 1 | 0 | 0 | 0 | 0 | 178 | 7.5 | 165 |
| 1 | 1 | 0 | 0 | 0 | 0 | 179 | 7.5 | 165 |
| 1 | 1 | 0 | 0 | 0 | 0 | 180 | 7.5 | 180 |
| 1 | 0 | 1 | 0 | 0 | 0 | 0   | 7.5 | 45  |
| 1 | 0 | 1 | 0 | 0 | 0 | 1   | 7.5 | 45  |
| 1 | 0 | 1 | 0 | 0 | 0 | 2   | 7.5 | 45  |
| 1 | 0 | 1 | 0 | 0 | 0 | 3   | 7.5 | 45  |
| 1 | 0 | 1 | 0 | 0 | 0 | 4   | 7.5 | 45  |
| 1 | 0 | 1 | 0 | 0 | 0 | 5   | 7.5 | 45  |
| 1 | 0 | 1 | 0 | 0 | 0 | 6   | 7.5 | 45  |
| 1 | 0 | 1 | 0 | 0 | 0 | 7   | 7.5 | 45  |
| 1 | 0 | 1 | 0 | 0 | 0 | 8   | 7.5 | 45  |
| 1 | 0 | 1 | 0 | 0 | 0 | 9   | 7.5 | 45  |
| 1 | 0 | 1 | 0 | 0 | 0 | 10  | 7.5 | 45  |
| 1 | 0 | 1 | 0 | 0 | 0 | 11  | 7.5 | 45  |
| 1 | 0 | 1 | 0 | 0 | 0 | 12  | 7.5 | 45  |
| 1 | 0 | 1 | 0 | 0 | 0 | 13  | 7.5 | 45  |
| 1 | 0 | 1 | 0 | 0 | 0 | 14  | 7.5 | 45  |

|   |   |   |   |   |   |    |     |    |
|---|---|---|---|---|---|----|-----|----|
| 1 | 0 | 1 | 0 | 0 | 0 | 15 | 7.5 | 45 |
| 1 | 0 | 1 | 0 | 0 | 0 | 16 | 7.5 | 45 |
| 1 | 0 | 1 | 0 | 0 | 0 | 17 | 7.5 | 45 |
| 1 | 0 | 1 | 0 | 0 | 0 | 18 | 7.5 | 45 |
| 1 | 0 | 1 | 0 | 0 | 0 | 19 | 7.5 | 45 |
| 1 | 0 | 1 | 0 | 0 | 0 | 20 | 7.5 | 45 |
| 1 | 0 | 1 | 0 | 0 | 0 | 21 | 7.5 | 45 |
| 1 | 0 | 1 | 0 | 0 | 0 | 22 | 7.5 | 45 |
| 1 | 0 | 1 | 0 | 0 | 0 | 23 | 7.5 | 45 |
| 1 | 0 | 1 | 0 | 0 | 0 | 24 | 7.5 | 45 |
| 1 | 0 | 1 | 0 | 0 | 0 | 25 | 7.5 | 45 |
| 1 | 0 | 1 | 0 | 0 | 0 | 26 | 7.5 | 45 |
| 1 | 0 | 1 | 0 | 0 | 0 | 27 | 7.5 | 45 |
| 1 | 0 | 1 | 0 | 0 | 0 | 28 | 7.5 | 45 |
| 1 | 0 | 1 | 0 | 0 | 0 | 29 | 7.5 | 45 |
| 1 | 0 | 1 | 0 | 0 | 0 | 30 | 7.5 | 45 |
| 1 | 0 | 1 | 0 | 0 | 0 | 31 | 7.5 | 45 |
| 1 | 0 | 1 | 0 | 0 | 0 | 32 | 7.5 | 45 |
| 1 | 0 | 1 | 0 | 0 | 0 | 33 | 7.5 | 45 |
| 1 | 0 | 1 | 0 | 0 | 0 | 34 | 7.5 | 45 |
| 1 | 0 | 1 | 0 | 0 | 0 | 35 | 7.5 | 45 |
| 1 | 0 | 1 | 0 | 0 | 0 | 36 | 7.5 | 45 |
| 1 | 0 | 1 | 0 | 0 | 0 | 37 | 7.5 | 45 |
| 1 | 0 | 1 | 0 | 0 | 0 | 38 | 7.5 | 45 |
| 1 | 0 | 1 | 0 | 0 | 0 | 39 | 7.5 | 45 |
| 1 | 0 | 1 | 0 | 0 | 0 | 40 | 7.5 | 45 |
| 1 | 0 | 1 | 0 | 0 | 0 | 41 | 7.5 | 45 |
| 1 | 0 | 1 | 0 | 0 | 0 | 42 | 7.5 | 45 |
| 1 | 0 | 1 | 0 | 0 | 0 | 43 | 7.5 | 45 |
| 1 | 0 | 1 | 0 | 0 | 0 | 44 | 7.5 | 45 |
| 1 | 0 | 1 | 0 | 0 | 0 | 45 | 7.5 | 45 |
| 1 | 0 | 1 | 0 | 0 | 0 | 46 | 7.5 | 45 |
| 1 | 0 | 1 | 0 | 0 | 0 | 47 | 7.5 | 45 |
| 1 | 0 | 1 | 0 | 0 | 0 | 48 | 7.5 | 45 |
| 1 | 0 | 1 | 0 | 0 | 0 | 49 | 7.5 | 45 |
| 1 | 0 | 1 | 0 | 0 | 0 | 50 | 7.5 | 45 |
| 1 | 0 | 1 | 0 | 0 | 0 | 51 | 7.5 | 45 |
| 1 | 0 | 1 | 0 | 0 | 0 | 52 | 7.5 | 45 |
| 1 | 0 | 1 | 0 | 0 | 0 | 53 | 7.5 | 45 |
| 1 | 0 | 1 | 0 | 0 | 0 | 54 | 7.5 | 45 |
| 1 | 0 | 1 | 0 | 0 | 0 | 55 | 7.5 | 45 |
| 1 | 0 | 1 | 0 | 0 | 0 | 56 | 7.5 | 45 |
| 1 | 0 | 1 | 0 | 0 | 0 | 57 | 7.5 | 45 |
| 1 | 0 | 1 | 0 | 0 | 0 | 58 | 7.5 | 45 |
| 1 | 0 | 1 | 0 | 0 | 0 | 59 | 7.5 | 45 |
| 1 | 0 | 1 | 0 | 0 | 0 | 60 | 7.5 | 45 |

|   |   |   |   |   |   |     |     |     |
|---|---|---|---|---|---|-----|-----|-----|
| 1 | 0 | 1 | 0 | 0 | 0 | 61  | 7.5 | 45  |
| 1 | 0 | 1 | 0 | 0 | 0 | 62  | 7.5 | 45  |
| 1 | 0 | 1 | 0 | 0 | 0 | 63  | 7.5 | 45  |
| 1 | 0 | 1 | 0 | 0 | 0 | 64  | 7.5 | 45  |
| 1 | 0 | 1 | 0 | 0 | 0 | 65  | 7.5 | 45  |
| 1 | 0 | 1 | 0 | 0 | 0 | 66  | 7.5 | 45  |
| 1 | 0 | 1 | 0 | 0 | 0 | 67  | 7.5 | 45  |
| 1 | 0 | 1 | 0 | 0 | 0 | 68  | 7.5 | 45  |
| 1 | 0 | 1 | 0 | 0 | 0 | 69  | 7.5 | 45  |
| 1 | 0 | 1 | 0 | 0 | 0 | 70  | 7.5 | 45  |
| 1 | 0 | 1 | 0 | 0 | 0 | 71  | 7.5 | 45  |
| 1 | 0 | 1 | 0 | 0 | 0 | 72  | 7.5 | 45  |
| 1 | 0 | 1 | 0 | 0 | 0 | 73  | 7.5 | 45  |
| 1 | 0 | 1 | 0 | 0 | 0 | 74  | 7.5 | 45  |
| 1 | 0 | 1 | 0 | 0 | 0 | 75  | 7.5 | 45  |
| 1 | 0 | 1 | 0 | 0 | 0 | 76  | 7.5 | 105 |
| 1 | 0 | 1 | 0 | 0 | 0 | 77  | 7.5 | 105 |
| 1 | 0 | 1 | 0 | 0 | 0 | 78  | 7.5 | 105 |
| 1 | 0 | 1 | 0 | 0 | 0 | 79  | 7.5 | 105 |
| 1 | 0 | 1 | 0 | 0 | 0 | 80  | 7.5 | 105 |
| 1 | 0 | 1 | 0 | 0 | 0 | 81  | 7.5 | 105 |
| 1 | 0 | 1 | 0 | 0 | 0 | 82  | 7.5 | 105 |
| 1 | 0 | 1 | 0 | 0 | 0 | 83  | 7.5 | 105 |
| 1 | 0 | 1 | 0 | 0 | 0 | 84  | 7.5 | 105 |
| 1 | 0 | 1 | 0 | 0 | 0 | 85  | 7.5 | 105 |
| 1 | 0 | 1 | 0 | 0 | 0 | 86  | 7.5 | 105 |
| 1 | 0 | 1 | 0 | 0 | 0 | 87  | 7.5 | 105 |
| 1 | 0 | 1 | 0 | 0 | 0 | 88  | 7.5 | 105 |
| 1 | 0 | 1 | 0 | 0 | 0 | 89  | 7.5 | 105 |
| 1 | 0 | 1 | 0 | 0 | 0 | 90  | 7.5 | 105 |
| 1 | 0 | 1 | 0 | 0 | 0 | 91  | 7.5 | 105 |
| 1 | 0 | 1 | 0 | 0 | 0 | 92  | 7.5 | 105 |
| 1 | 0 | 1 | 0 | 0 | 0 | 93  | 7.5 | 105 |
| 1 | 0 | 1 | 0 | 0 | 0 | 94  | 7.5 | 105 |
| 1 | 0 | 1 | 0 | 0 | 0 | 95  | 7.5 | 105 |
| 1 | 0 | 1 | 0 | 0 | 0 | 96  | 7.5 | 105 |
| 1 | 0 | 1 | 0 | 0 | 0 | 97  | 7.5 | 105 |
| 1 | 0 | 1 | 0 | 0 | 0 | 98  | 7.5 | 105 |
| 1 | 0 | 1 | 0 | 0 | 0 | 99  | 7.5 | 105 |
| 1 | 0 | 1 | 0 | 0 | 0 | 100 | 7.5 | 105 |
| 1 | 0 | 1 | 0 | 0 | 0 | 101 | 7.5 | 105 |
| 1 | 0 | 1 | 0 | 0 | 0 | 102 | 7.5 | 105 |
| 1 | 0 | 1 | 0 | 0 | 0 | 103 | 7.5 | 105 |
| 1 | 0 | 1 | 0 | 0 | 0 | 104 | 7.5 | 105 |
| 1 | 0 | 1 | 0 | 0 | 0 | 105 | 7.5 | 105 |
| 1 | 0 | 1 | 0 | 0 | 0 | 106 | 7.5 | 105 |

|   |   |   |   |   |   |     |     |     |
|---|---|---|---|---|---|-----|-----|-----|
| 1 | 0 | 1 | 0 | 0 | 0 | 107 | 7.5 | 105 |
| 1 | 0 | 1 | 0 | 0 | 0 | 108 | 7.5 | 105 |
| 1 | 0 | 1 | 0 | 0 | 0 | 109 | 7.5 | 105 |
| 1 | 0 | 1 | 0 | 0 | 0 | 110 | 7.5 | 105 |
| 1 | 0 | 1 | 0 | 0 | 0 | 111 | 7.5 | 105 |
| 1 | 0 | 1 | 0 | 0 | 0 | 112 | 7.5 | 105 |
| 1 | 0 | 1 | 0 | 0 | 0 | 113 | 7.5 | 105 |
| 1 | 0 | 1 | 0 | 0 | 0 | 114 | 7.5 | 105 |
| 1 | 0 | 1 | 0 | 0 | 0 | 115 | 7.5 | 105 |
| 1 | 0 | 1 | 0 | 0 | 0 | 116 | 7.5 | 105 |
| 1 | 0 | 1 | 0 | 0 | 0 | 117 | 7.5 | 105 |
| 1 | 0 | 1 | 0 | 0 | 0 | 118 | 7.5 | 105 |
| 1 | 0 | 1 | 0 | 0 | 0 | 119 | 7.5 | 105 |
| 1 | 0 | 1 | 0 | 0 | 0 | 120 | 7.5 | 120 |
| 1 | 0 | 1 | 0 | 0 | 0 | 121 | 7.5 | 135 |
| 1 | 0 | 1 | 0 | 0 | 0 | 122 | 7.5 | 135 |
| 1 | 0 | 1 | 0 | 0 | 0 | 123 | 7.5 | 135 |
| 1 | 0 | 1 | 0 | 0 | 0 | 124 | 7.5 | 135 |
| 1 | 0 | 1 | 0 | 0 | 0 | 125 | 7.5 | 135 |
| 1 | 0 | 1 | 0 | 0 | 0 | 126 | 7.5 | 135 |
| 1 | 0 | 1 | 0 | 0 | 0 | 127 | 7.5 | 135 |
| 1 | 0 | 1 | 0 | 0 | 0 | 128 | 7.5 | 135 |
| 1 | 0 | 1 | 0 | 0 | 0 | 129 | 7.5 | 135 |
| 1 | 0 | 1 | 0 | 0 | 0 | 130 | 7.5 | 135 |
| 1 | 0 | 1 | 0 | 0 | 0 | 131 | 7.5 | 135 |
| 1 | 0 | 1 | 0 | 0 | 0 | 132 | 7.5 | 135 |
| 1 | 0 | 1 | 0 | 0 | 0 | 133 | 7.5 | 135 |
| 1 | 0 | 1 | 0 | 0 | 0 | 134 | 7.5 | 135 |
| 1 | 0 | 1 | 0 | 0 | 0 | 135 | 7.5 | 135 |
| 1 | 0 | 1 | 0 | 0 | 0 | 136 | 7.5 | 135 |
| 1 | 0 | 1 | 0 | 0 | 0 | 137 | 7.5 | 135 |
| 1 | 0 | 1 | 0 | 0 | 0 | 138 | 7.5 | 135 |
| 1 | 0 | 1 | 0 | 0 | 0 | 139 | 7.5 | 135 |
| 1 | 0 | 1 | 0 | 0 | 0 | 140 | 7.5 | 135 |
| 1 | 0 | 1 | 0 | 0 | 0 | 141 | 7.5 | 135 |
| 1 | 0 | 1 | 0 | 0 | 0 | 142 | 7.5 | 135 |
| 1 | 0 | 1 | 0 | 0 | 0 | 143 | 7.5 | 135 |
| 1 | 0 | 1 | 0 | 0 | 0 | 144 | 7.5 | 135 |
| 1 | 0 | 1 | 0 | 0 | 0 | 145 | 7.5 | 135 |
| 1 | 0 | 1 | 0 | 0 | 0 | 146 | 7.5 | 135 |
| 1 | 0 | 1 | 0 | 0 | 0 | 147 | 7.5 | 135 |
| 1 | 0 | 1 | 0 | 0 | 0 | 148 | 7.5 | 135 |
| 1 | 0 | 1 | 0 | 0 | 0 | 149 | 7.5 | 135 |
| 1 | 0 | 1 | 0 | 0 | 0 | 150 | 7.5 | 150 |
| 1 | 0 | 1 | 0 | 0 | 0 | 151 | 7.5 | 165 |
| 1 | 0 | 1 | 0 | 0 | 0 | 152 | 7.5 | 165 |

|   |   |   |   |   |   |     |     |     |
|---|---|---|---|---|---|-----|-----|-----|
| 1 | 0 | 1 | 0 | 0 | 0 | 153 | 7.5 | 165 |
| 1 | 0 | 1 | 0 | 0 | 0 | 154 | 7.5 | 165 |
| 1 | 0 | 1 | 0 | 0 | 0 | 155 | 7.5 | 165 |
| 1 | 0 | 1 | 0 | 0 | 0 | 156 | 7.5 | 165 |
| 1 | 0 | 1 | 0 | 0 | 0 | 157 | 7.5 | 165 |
| 1 | 0 | 1 | 0 | 0 | 0 | 158 | 7.5 | 165 |
| 1 | 0 | 1 | 0 | 0 | 0 | 159 | 7.5 | 165 |
| 1 | 0 | 1 | 0 | 0 | 0 | 160 | 7.5 | 165 |
| 1 | 0 | 1 | 0 | 0 | 0 | 161 | 7.5 | 165 |
| 1 | 0 | 1 | 0 | 0 | 0 | 162 | 7.5 | 165 |
| 1 | 0 | 1 | 0 | 0 | 0 | 163 | 7.5 | 165 |
| 1 | 0 | 1 | 0 | 0 | 0 | 164 | 7.5 | 165 |
| 1 | 0 | 1 | 0 | 0 | 0 | 165 | 7.5 | 165 |
| 1 | 0 | 1 | 0 | 0 | 0 | 166 | 7.5 | 165 |
| 1 | 0 | 1 | 0 | 0 | 0 | 167 | 7.5 | 165 |
| 1 | 0 | 1 | 0 | 0 | 0 | 168 | 7.5 | 165 |
| 1 | 0 | 1 | 0 | 0 | 0 | 169 | 7.5 | 165 |
| 1 | 0 | 1 | 0 | 0 | 0 | 170 | 7.5 | 165 |
| 1 | 0 | 1 | 0 | 0 | 0 | 171 | 7.5 | 165 |
| 1 | 0 | 1 | 0 | 0 | 0 | 172 | 7.5 | 165 |
| 1 | 0 | 1 | 0 | 0 | 0 | 173 | 7.5 | 165 |
| 1 | 0 | 1 | 0 | 0 | 0 | 174 | 7.5 | 165 |
| 1 | 0 | 1 | 0 | 0 | 0 | 175 | 7.5 | 165 |
| 1 | 0 | 1 | 0 | 0 | 0 | 176 | 7.5 | 165 |
| 1 | 0 | 1 | 0 | 0 | 0 | 177 | 7.5 | 165 |
| 1 | 0 | 1 | 0 | 0 | 0 | 178 | 7.5 | 165 |
| 1 | 0 | 1 | 0 | 0 | 0 | 179 | 7.5 | 165 |
| 1 | 0 | 1 | 0 | 0 | 0 | 180 | 7.5 | 180 |
| 1 | 0 | 0 | 1 | 0 | 0 | 0   | 7.5 | 45  |
| 1 | 0 | 0 | 1 | 0 | 0 | 1   | 7.5 | 45  |
| 1 | 0 | 0 | 1 | 0 | 0 | 2   | 7.5 | 45  |
| 1 | 0 | 0 | 1 | 0 | 0 | 3   | 7.5 | 45  |
| 1 | 0 | 0 | 1 | 0 | 0 | 4   | 7.5 | 45  |
| 1 | 0 | 0 | 1 | 0 | 0 | 5   | 7.5 | 45  |
| 1 | 0 | 0 | 1 | 0 | 0 | 6   | 7.5 | 45  |
| 1 | 0 | 0 | 1 | 0 | 0 | 7   | 7.5 | 45  |
| 1 | 0 | 0 | 1 | 0 | 0 | 8   | 7.5 | 45  |
| 1 | 0 | 0 | 1 | 0 | 0 | 9   | 7.5 | 45  |
| 1 | 0 | 0 | 1 | 0 | 0 | 10  | 7.5 | 45  |
| 1 | 0 | 0 | 1 | 0 | 0 | 11  | 7.5 | 45  |
| 1 | 0 | 0 | 1 | 0 | 0 | 12  | 7.5 | 45  |
| 1 | 0 | 0 | 1 | 0 | 0 | 13  | 7.5 | 45  |
| 1 | 0 | 0 | 1 | 0 | 0 | 14  | 7.5 | 45  |
| 1 | 0 | 0 | 1 | 0 | 0 | 15  | 7.5 | 45  |
| 1 | 0 | 0 | 1 | 0 | 0 | 16  | 7.5 | 45  |
| 1 | 0 | 0 | 1 | 0 | 0 | 17  | 7.5 | 45  |

|   |   |   |   |   |   |    |     |    |
|---|---|---|---|---|---|----|-----|----|
| 1 | 0 | 0 | 1 | 0 | 0 | 18 | 7.5 | 45 |
| 1 | 0 | 0 | 1 | 0 | 0 | 19 | 7.5 | 45 |
| 1 | 0 | 0 | 1 | 0 | 0 | 20 | 7.5 | 45 |
| 1 | 0 | 0 | 1 | 0 | 0 | 21 | 7.5 | 45 |
| 1 | 0 | 0 | 1 | 0 | 0 | 22 | 7.5 | 45 |
| 1 | 0 | 0 | 1 | 0 | 0 | 23 | 7.5 | 45 |
| 1 | 0 | 0 | 1 | 0 | 0 | 24 | 7.5 | 45 |
| 1 | 0 | 0 | 1 | 0 | 0 | 25 | 7.5 | 45 |
| 1 | 0 | 0 | 1 | 0 | 0 | 26 | 7.5 | 45 |
| 1 | 0 | 0 | 1 | 0 | 0 | 27 | 7.5 | 45 |
| 1 | 0 | 0 | 1 | 0 | 0 | 28 | 7.5 | 45 |
| 1 | 0 | 0 | 1 | 0 | 0 | 29 | 7.5 | 45 |
| 1 | 0 | 0 | 1 | 0 | 0 | 30 | 7.5 | 45 |
| 1 | 0 | 0 | 1 | 0 | 0 | 31 | 7.5 | 45 |
| 1 | 0 | 0 | 1 | 0 | 0 | 32 | 7.5 | 45 |
| 1 | 0 | 0 | 1 | 0 | 0 | 33 | 7.5 | 45 |
| 1 | 0 | 0 | 1 | 0 | 0 | 34 | 7.5 | 45 |
| 1 | 0 | 0 | 1 | 0 | 0 | 35 | 7.5 | 45 |
| 1 | 0 | 0 | 1 | 0 | 0 | 36 | 7.5 | 45 |
| 1 | 0 | 0 | 1 | 0 | 0 | 37 | 7.5 | 45 |
| 1 | 0 | 0 | 1 | 0 | 0 | 38 | 7.5 | 45 |
| 1 | 0 | 0 | 1 | 0 | 0 | 39 | 7.5 | 45 |
| 1 | 0 | 0 | 1 | 0 | 0 | 40 | 7.5 | 45 |
| 1 | 0 | 0 | 1 | 0 | 0 | 41 | 7.5 | 45 |
| 1 | 0 | 0 | 1 | 0 | 0 | 42 | 7.5 | 45 |
| 1 | 0 | 0 | 1 | 0 | 0 | 43 | 7.5 | 45 |
| 1 | 0 | 0 | 1 | 0 | 0 | 44 | 7.5 | 45 |
| 1 | 0 | 0 | 1 | 0 | 0 | 45 | 7.5 | 45 |
| 1 | 0 | 0 | 1 | 0 | 0 | 46 | 7.5 | 45 |
| 1 | 0 | 0 | 1 | 0 | 0 | 47 | 7.5 | 45 |
| 1 | 0 | 0 | 1 | 0 | 0 | 48 | 7.5 | 45 |
| 1 | 0 | 0 | 1 | 0 | 0 | 49 | 7.5 | 45 |
| 1 | 0 | 0 | 1 | 0 | 0 | 50 | 7.5 | 45 |
| 1 | 0 | 0 | 1 | 0 | 0 | 51 | 7.5 | 45 |
| 1 | 0 | 0 | 1 | 0 | 0 | 52 | 7.5 | 45 |
| 1 | 0 | 0 | 1 | 0 | 0 | 53 | 7.5 | 45 |
| 1 | 0 | 0 | 1 | 0 | 0 | 54 | 7.5 | 45 |
| 1 | 0 | 0 | 1 | 0 | 0 | 55 | 7.5 | 45 |
| 1 | 0 | 0 | 1 | 0 | 0 | 56 | 7.5 | 45 |
| 1 | 0 | 0 | 1 | 0 | 0 | 57 | 7.5 | 45 |
| 1 | 0 | 0 | 1 | 0 | 0 | 58 | 7.5 | 45 |
| 1 | 0 | 0 | 1 | 0 | 0 | 59 | 7.5 | 45 |
| 1 | 0 | 0 | 1 | 0 | 0 | 60 | 7.5 | 60 |
| 1 | 0 | 0 | 1 | 0 | 0 | 61 | 7.5 | 75 |
| 1 | 0 | 0 | 1 | 0 | 0 | 62 | 7.5 | 75 |
| 1 | 0 | 0 | 1 | 0 | 0 | 63 | 7.5 | 75 |

|   |   |   |   |   |   |     |     |     |
|---|---|---|---|---|---|-----|-----|-----|
| 1 | 0 | 0 | 1 | 0 | 0 | 64  | 7.5 | 75  |
| 1 | 0 | 0 | 1 | 0 | 0 | 65  | 7.5 | 75  |
| 1 | 0 | 0 | 1 | 0 | 0 | 66  | 7.5 | 75  |
| 1 | 0 | 0 | 1 | 0 | 0 | 67  | 7.5 | 75  |
| 1 | 0 | 0 | 1 | 0 | 0 | 68  | 7.5 | 75  |
| 1 | 0 | 0 | 1 | 0 | 0 | 69  | 7.5 | 75  |
| 1 | 0 | 0 | 1 | 0 | 0 | 70  | 7.5 | 75  |
| 1 | 0 | 0 | 1 | 0 | 0 | 71  | 7.5 | 75  |
| 1 | 0 | 0 | 1 | 0 | 0 | 72  | 7.5 | 75  |
| 1 | 0 | 0 | 1 | 0 | 0 | 73  | 7.5 | 75  |
| 1 | 0 | 0 | 1 | 0 | 0 | 74  | 7.5 | 75  |
| 1 | 0 | 0 | 1 | 0 | 0 | 75  | 7.5 | 75  |
| 1 | 0 | 0 | 1 | 0 | 0 | 76  | 7.5 | 75  |
| 1 | 0 | 0 | 1 | 0 | 0 | 77  | 7.5 | 75  |
| 1 | 0 | 0 | 1 | 0 | 0 | 78  | 7.5 | 75  |
| 1 | 0 | 0 | 1 | 0 | 0 | 79  | 7.5 | 75  |
| 1 | 0 | 0 | 1 | 0 | 0 | 80  | 7.5 | 75  |
| 1 | 0 | 0 | 1 | 0 | 0 | 81  | 7.5 | 75  |
| 1 | 0 | 0 | 1 | 0 | 0 | 82  | 7.5 | 75  |
| 1 | 0 | 0 | 1 | 0 | 0 | 83  | 7.5 | 75  |
| 1 | 0 | 0 | 1 | 0 | 0 | 84  | 7.5 | 75  |
| 1 | 0 | 0 | 1 | 0 | 0 | 85  | 7.5 | 75  |
| 1 | 0 | 0 | 1 | 0 | 0 | 86  | 7.5 | 75  |
| 1 | 0 | 0 | 1 | 0 | 0 | 87  | 7.5 | 75  |
| 1 | 0 | 0 | 1 | 0 | 0 | 88  | 7.5 | 75  |
| 1 | 0 | 0 | 1 | 0 | 0 | 89  | 7.5 | 75  |
| 1 | 0 | 0 | 1 | 0 | 0 | 90  | 7.5 | 75  |
| 1 | 0 | 0 | 1 | 0 | 0 | 91  | 7.5 | 75  |
| 1 | 0 | 0 | 1 | 0 | 0 | 92  | 7.5 | 75  |
| 1 | 0 | 0 | 1 | 0 | 0 | 93  | 7.5 | 75  |
| 1 | 0 | 0 | 1 | 0 | 0 | 94  | 7.5 | 75  |
| 1 | 0 | 0 | 1 | 0 | 0 | 95  | 7.5 | 75  |
| 1 | 0 | 0 | 1 | 0 | 0 | 96  | 7.5 | 75  |
| 1 | 0 | 0 | 1 | 0 | 0 | 97  | 7.5 | 75  |
| 1 | 0 | 0 | 1 | 0 | 0 | 98  | 7.5 | 75  |
| 1 | 0 | 0 | 1 | 0 | 0 | 99  | 7.5 | 75  |
| 1 | 0 | 0 | 1 | 0 | 0 | 100 | 7.5 | 75  |
| 1 | 0 | 0 | 1 | 0 | 0 | 101 | 7.5 | 75  |
| 1 | 0 | 0 | 1 | 0 | 0 | 102 | 7.5 | 75  |
| 1 | 0 | 0 | 1 | 0 | 0 | 103 | 7.5 | 75  |
| 1 | 0 | 0 | 1 | 0 | 0 | 104 | 7.5 | 75  |
| 1 | 0 | 0 | 1 | 0 | 0 | 105 | 7.5 | 75  |
| 1 | 0 | 0 | 1 | 0 | 0 | 106 | 7.5 | 135 |
| 1 | 0 | 0 | 1 | 0 | 0 | 107 | 7.5 | 135 |
| 1 | 0 | 0 | 1 | 0 | 0 | 108 | 7.5 | 135 |
| 1 | 0 | 0 | 1 | 0 | 0 | 109 | 7.5 | 135 |

|   |   |   |   |   |   |     |     |     |
|---|---|---|---|---|---|-----|-----|-----|
| 1 | 0 | 0 | 1 | 0 | 0 | 110 | 7.5 | 135 |
| 1 | 0 | 0 | 1 | 0 | 0 | 111 | 7.5 | 135 |
| 1 | 0 | 0 | 1 | 0 | 0 | 112 | 7.5 | 135 |
| 1 | 0 | 0 | 1 | 0 | 0 | 113 | 7.5 | 135 |
| 1 | 0 | 0 | 1 | 0 | 0 | 114 | 7.5 | 135 |
| 1 | 0 | 0 | 1 | 0 | 0 | 115 | 7.5 | 135 |
| 1 | 0 | 0 | 1 | 0 | 0 | 116 | 7.5 | 135 |
| 1 | 0 | 0 | 1 | 0 | 0 | 117 | 7.5 | 135 |
| 1 | 0 | 0 | 1 | 0 | 0 | 118 | 7.5 | 135 |
| 1 | 0 | 0 | 1 | 0 | 0 | 119 | 7.5 | 135 |
| 1 | 0 | 0 | 1 | 0 | 0 | 120 | 7.5 | 135 |
| 1 | 0 | 0 | 1 | 0 | 0 | 121 | 7.5 | 135 |
| 1 | 0 | 0 | 1 | 0 | 0 | 122 | 7.5 | 135 |
| 1 | 0 | 0 | 1 | 0 | 0 | 123 | 7.5 | 135 |
| 1 | 0 | 0 | 1 | 0 | 0 | 124 | 7.5 | 135 |
| 1 | 0 | 0 | 1 | 0 | 0 | 125 | 7.5 | 135 |
| 1 | 0 | 0 | 1 | 0 | 0 | 126 | 7.5 | 135 |
| 1 | 0 | 0 | 1 | 0 | 0 | 127 | 7.5 | 135 |
| 1 | 0 | 0 | 1 | 0 | 0 | 128 | 7.5 | 135 |
| 1 | 0 | 0 | 1 | 0 | 0 | 129 | 7.5 | 135 |
| 1 | 0 | 0 | 1 | 0 | 0 | 130 | 7.5 | 135 |
| 1 | 0 | 0 | 1 | 0 | 0 | 131 | 7.5 | 135 |
| 1 | 0 | 0 | 1 | 0 | 0 | 132 | 7.5 | 135 |
| 1 | 0 | 0 | 1 | 0 | 0 | 133 | 7.5 | 135 |
| 1 | 0 | 0 | 1 | 0 | 0 | 134 | 7.5 | 135 |
| 1 | 0 | 0 | 1 | 0 | 0 | 135 | 7.5 | 135 |
| 1 | 0 | 0 | 1 | 0 | 0 | 136 | 7.5 | 135 |
| 1 | 0 | 0 | 1 | 0 | 0 | 137 | 7.5 | 135 |
| 1 | 0 | 0 | 1 | 0 | 0 | 138 | 7.5 | 135 |
| 1 | 0 | 0 | 1 | 0 | 0 | 139 | 7.5 | 135 |
| 1 | 0 | 0 | 1 | 0 | 0 | 140 | 7.5 | 135 |
| 1 | 0 | 0 | 1 | 0 | 0 | 141 | 7.5 | 135 |
| 1 | 0 | 0 | 1 | 0 | 0 | 142 | 7.5 | 135 |
| 1 | 0 | 0 | 1 | 0 | 0 | 143 | 7.5 | 135 |
| 1 | 0 | 0 | 1 | 0 | 0 | 144 | 7.5 | 135 |
| 1 | 0 | 0 | 1 | 0 | 0 | 145 | 7.5 | 135 |
| 1 | 0 | 0 | 1 | 0 | 0 | 146 | 7.5 | 135 |
| 1 | 0 | 0 | 1 | 0 | 0 | 147 | 7.5 | 135 |
| 1 | 0 | 0 | 1 | 0 | 0 | 148 | 7.5 | 135 |
| 1 | 0 | 0 | 1 | 0 | 0 | 149 | 7.5 | 135 |
| 1 | 0 | 0 | 1 | 0 | 0 | 150 | 7.5 | 150 |
| 1 | 0 | 0 | 1 | 0 | 0 | 151 | 7.5 | 165 |
| 1 | 0 | 0 | 1 | 0 | 0 | 152 | 7.5 | 165 |
| 1 | 0 | 0 | 1 | 0 | 0 | 153 | 7.5 | 165 |
| 1 | 0 | 0 | 1 | 0 | 0 | 154 | 7.5 | 165 |
| 1 | 0 | 0 | 1 | 0 | 0 | 155 | 7.5 | 165 |

|   |   |   |   |   |   |     |     |     |
|---|---|---|---|---|---|-----|-----|-----|
| 1 | 0 | 0 | 1 | 0 | 0 | 156 | 7.5 | 165 |
| 1 | 0 | 0 | 1 | 0 | 0 | 157 | 7.5 | 165 |
| 1 | 0 | 0 | 1 | 0 | 0 | 158 | 7.5 | 165 |
| 1 | 0 | 0 | 1 | 0 | 0 | 159 | 7.5 | 165 |
| 1 | 0 | 0 | 1 | 0 | 0 | 160 | 7.5 | 165 |
| 1 | 0 | 0 | 1 | 0 | 0 | 161 | 7.5 | 165 |
| 1 | 0 | 0 | 1 | 0 | 0 | 162 | 7.5 | 165 |
| 1 | 0 | 0 | 1 | 0 | 0 | 163 | 7.5 | 165 |
| 1 | 0 | 0 | 1 | 0 | 0 | 164 | 7.5 | 165 |
| 1 | 0 | 0 | 1 | 0 | 0 | 165 | 7.5 | 165 |
| 1 | 0 | 0 | 1 | 0 | 0 | 166 | 7.5 | 165 |
| 1 | 0 | 0 | 1 | 0 | 0 | 167 | 7.5 | 165 |
| 1 | 0 | 0 | 1 | 0 | 0 | 168 | 7.5 | 165 |
| 1 | 0 | 0 | 1 | 0 | 0 | 169 | 7.5 | 165 |
| 1 | 0 | 0 | 1 | 0 | 0 | 170 | 7.5 | 165 |
| 1 | 0 | 0 | 1 | 0 | 0 | 171 | 7.5 | 165 |
| 1 | 0 | 0 | 1 | 0 | 0 | 172 | 7.5 | 165 |
| 1 | 0 | 0 | 1 | 0 | 0 | 173 | 7.5 | 165 |
| 1 | 0 | 0 | 1 | 0 | 0 | 174 | 7.5 | 165 |
| 1 | 0 | 0 | 1 | 0 | 0 | 175 | 7.5 | 165 |
| 1 | 0 | 0 | 1 | 0 | 0 | 176 | 7.5 | 165 |
| 1 | 0 | 0 | 1 | 0 | 0 | 177 | 7.5 | 165 |
| 1 | 0 | 0 | 1 | 0 | 0 | 178 | 7.5 | 165 |
| 1 | 0 | 0 | 1 | 0 | 0 | 179 | 7.5 | 165 |
| 1 | 0 | 0 | 1 | 0 | 0 | 180 | 7.5 | 180 |
| 1 | 0 | 0 | 0 | 1 | 0 | 0   | 7.5 | 45  |
| 1 | 0 | 0 | 0 | 1 | 0 | 1   | 7.5 | 45  |
| 1 | 0 | 0 | 0 | 1 | 0 | 2   | 7.5 | 45  |
| 1 | 0 | 0 | 0 | 1 | 0 | 3   | 7.5 | 45  |
| 1 | 0 | 0 | 0 | 1 | 0 | 4   | 7.5 | 45  |
| 1 | 0 | 0 | 0 | 1 | 0 | 5   | 7.5 | 45  |
| 1 | 0 | 0 | 0 | 1 | 0 | 6   | 7.5 | 45  |
| 1 | 0 | 0 | 0 | 1 | 0 | 7   | 7.5 | 45  |
| 1 | 0 | 0 | 0 | 1 | 0 | 8   | 7.5 | 45  |
| 1 | 0 | 0 | 0 | 1 | 0 | 9   | 7.5 | 45  |
| 1 | 0 | 0 | 0 | 1 | 0 | 10  | 7.5 | 45  |
| 1 | 0 | 0 | 0 | 1 | 0 | 11  | 7.5 | 45  |
| 1 | 0 | 0 | 0 | 1 | 0 | 12  | 7.5 | 45  |
| 1 | 0 | 0 | 0 | 1 | 0 | 13  | 7.5 | 45  |
| 1 | 0 | 0 | 0 | 1 | 0 | 14  | 7.5 | 45  |
| 1 | 0 | 0 | 0 | 1 | 0 | 15  | 7.5 | 45  |
| 1 | 0 | 0 | 0 | 1 | 0 | 16  | 7.5 | 45  |
| 1 | 0 | 0 | 0 | 1 | 0 | 17  | 7.5 | 45  |
| 1 | 0 | 0 | 0 | 1 | 0 | 18  | 7.5 | 45  |
| 1 | 0 | 0 | 0 | 1 | 0 | 19  | 7.5 | 45  |
| 1 | 0 | 0 | 0 | 1 | 0 | 20  | 7.5 | 45  |

|   |   |   |   |   |   |    |     |           |
|---|---|---|---|---|---|----|-----|-----------|
| 1 | 0 | 0 | 0 | 1 | 0 | 21 | 7.5 | 45        |
| 1 | 0 | 0 | 0 | 1 | 0 | 22 | 7.5 | 45        |
| 1 | 0 | 0 | 0 | 1 | 0 | 23 | 7.5 | 45        |
| 1 | 0 | 0 | 0 | 1 | 0 | 24 | 7.5 | 45        |
| 1 | 0 | 0 | 0 | 1 | 0 | 25 | 7.5 | 45        |
| 1 | 0 | 0 | 0 | 1 | 0 | 26 | 7.5 | 45        |
| 1 | 0 | 0 | 0 | 1 | 0 | 27 | 7.5 | 45        |
| 1 | 0 | 0 | 0 | 1 | 0 | 28 | 7.5 | 45        |
| 1 | 0 | 0 | 0 | 1 | 0 | 29 | 7.5 | 45        |
| 1 | 0 | 0 | 0 | 1 | 0 | 30 | 7.5 | <b>45</b> |
| 1 | 0 | 0 | 0 | 1 | 0 | 31 | 7.5 | 45        |
| 1 | 0 | 0 | 0 | 1 | 0 | 32 | 7.5 | 45        |
| 1 | 0 | 0 | 0 | 1 | 0 | 33 | 7.5 | 45        |
| 1 | 0 | 0 | 0 | 1 | 0 | 34 | 7.5 | 45        |
| 1 | 0 | 0 | 0 | 1 | 0 | 35 | 7.5 | 45        |
| 1 | 0 | 0 | 0 | 1 | 0 | 36 | 7.5 | 45        |
| 1 | 0 | 0 | 0 | 1 | 0 | 37 | 7.5 | 45        |
| 1 | 0 | 0 | 0 | 1 | 0 | 38 | 7.5 | 45        |
| 1 | 0 | 0 | 0 | 1 | 0 | 39 | 7.5 | 45        |
| 1 | 0 | 0 | 0 | 1 | 0 | 40 | 7.5 | 45        |
| 1 | 0 | 0 | 0 | 1 | 0 | 41 | 7.5 | 45        |
| 1 | 0 | 0 | 0 | 1 | 0 | 42 | 7.5 | 45        |
| 1 | 0 | 0 | 0 | 1 | 0 | 43 | 7.5 | 45        |
| 1 | 0 | 0 | 0 | 1 | 0 | 44 | 7.5 | 45        |
| 1 | 0 | 0 | 0 | 1 | 0 | 45 | 7.5 | 45        |
| 1 | 0 | 0 | 0 | 1 | 0 | 46 | 7.5 | 45        |
| 1 | 0 | 0 | 0 | 1 | 0 | 47 | 7.5 | 45        |
| 1 | 0 | 0 | 0 | 1 | 0 | 48 | 7.5 | 45        |
| 1 | 0 | 0 | 0 | 1 | 0 | 49 | 7.5 | 45        |
| 1 | 0 | 0 | 0 | 1 | 0 | 50 | 7.5 | 45        |
| 1 | 0 | 0 | 0 | 1 | 0 | 51 | 7.5 | 45        |
| 1 | 0 | 0 | 0 | 1 | 0 | 52 | 7.5 | 45        |
| 1 | 0 | 0 | 0 | 1 | 0 | 53 | 7.5 | 45        |
| 1 | 0 | 0 | 0 | 1 | 0 | 54 | 7.5 | 45        |
| 1 | 0 | 0 | 0 | 1 | 0 | 55 | 7.5 | 45        |
| 1 | 0 | 0 | 0 | 1 | 0 | 56 | 7.5 | 45        |
| 1 | 0 | 0 | 0 | 1 | 0 | 57 | 7.5 | 45        |
| 1 | 0 | 0 | 0 | 1 | 0 | 58 | 7.5 | 45        |
| 1 | 0 | 0 | 0 | 1 | 0 | 59 | 7.5 | 45        |
| 1 | 0 | 0 | 0 | 1 | 0 | 60 | 7.5 | <b>60</b> |
| 1 | 0 | 0 | 0 | 1 | 0 | 61 | 7.5 | 75        |
| 1 | 0 | 0 | 0 | 1 | 0 | 62 | 7.5 | 75        |
| 1 | 0 | 0 | 0 | 1 | 0 | 63 | 7.5 | 75        |
| 1 | 0 | 0 | 0 | 1 | 0 | 64 | 7.5 | 75        |
| 1 | 0 | 0 | 0 | 1 | 0 | 65 | 7.5 | 75        |
| 1 | 0 | 0 | 0 | 1 | 0 | 66 | 7.5 | 75        |

|   |   |   |   |   |   |     |     |     |
|---|---|---|---|---|---|-----|-----|-----|
| 1 | 0 | 0 | 0 | 1 | 0 | 67  | 7.5 | 75  |
| 1 | 0 | 0 | 0 | 1 | 0 | 68  | 7.5 | 75  |
| 1 | 0 | 0 | 0 | 1 | 0 | 69  | 7.5 | 75  |
| 1 | 0 | 0 | 0 | 1 | 0 | 70  | 7.5 | 75  |
| 1 | 0 | 0 | 0 | 1 | 0 | 71  | 7.5 | 75  |
| 1 | 0 | 0 | 0 | 1 | 0 | 72  | 7.5 | 75  |
| 1 | 0 | 0 | 0 | 1 | 0 | 73  | 7.5 | 75  |
| 1 | 0 | 0 | 0 | 1 | 0 | 74  | 7.5 | 75  |
| 1 | 0 | 0 | 0 | 1 | 0 | 75  | 7.5 | 75  |
| 1 | 0 | 0 | 0 | 1 | 0 | 76  | 7.5 | 75  |
| 1 | 0 | 0 | 0 | 1 | 0 | 77  | 7.5 | 75  |
| 1 | 0 | 0 | 0 | 1 | 0 | 78  | 7.5 | 75  |
| 1 | 0 | 0 | 0 | 1 | 0 | 79  | 7.5 | 75  |
| 1 | 0 | 0 | 0 | 1 | 0 | 80  | 7.5 | 75  |
| 1 | 0 | 0 | 0 | 1 | 0 | 81  | 7.5 | 75  |
| 1 | 0 | 0 | 0 | 1 | 0 | 82  | 7.5 | 75  |
| 1 | 0 | 0 | 0 | 1 | 0 | 83  | 7.5 | 75  |
| 1 | 0 | 0 | 0 | 1 | 0 | 84  | 7.5 | 75  |
| 1 | 0 | 0 | 0 | 1 | 0 | 85  | 7.5 | 75  |
| 1 | 0 | 0 | 0 | 1 | 0 | 86  | 7.5 | 75  |
| 1 | 0 | 0 | 0 | 1 | 0 | 87  | 7.5 | 75  |
| 1 | 0 | 0 | 0 | 1 | 0 | 88  | 7.5 | 75  |
| 1 | 0 | 0 | 0 | 1 | 0 | 89  | 7.5 | 75  |
| 1 | 0 | 0 | 0 | 1 | 0 | 90  | 7.5 | 90  |
| 1 | 0 | 0 | 0 | 1 | 0 | 91  | 7.5 | 105 |
| 1 | 0 | 0 | 0 | 1 | 0 | 92  | 7.5 | 105 |
| 1 | 0 | 0 | 0 | 1 | 0 | 93  | 7.5 | 105 |
| 1 | 0 | 0 | 0 | 1 | 0 | 94  | 7.5 | 105 |
| 1 | 0 | 0 | 0 | 1 | 0 | 95  | 7.5 | 105 |
| 1 | 0 | 0 | 0 | 1 | 0 | 96  | 7.5 | 105 |
| 1 | 0 | 0 | 0 | 1 | 0 | 97  | 7.5 | 105 |
| 1 | 0 | 0 | 0 | 1 | 0 | 98  | 7.5 | 105 |
| 1 | 0 | 0 | 0 | 1 | 0 | 99  | 7.5 | 105 |
| 1 | 0 | 0 | 0 | 1 | 0 | 100 | 7.5 | 105 |
| 1 | 0 | 0 | 0 | 1 | 0 | 101 | 7.5 | 105 |
| 1 | 0 | 0 | 0 | 1 | 0 | 102 | 7.5 | 105 |
| 1 | 0 | 0 | 0 | 1 | 0 | 103 | 7.5 | 105 |
| 1 | 0 | 0 | 0 | 1 | 0 | 104 | 7.5 | 105 |
| 1 | 0 | 0 | 0 | 1 | 0 | 105 | 7.5 | 105 |
| 1 | 0 | 0 | 0 | 1 | 0 | 106 | 7.5 | 105 |
| 1 | 0 | 0 | 0 | 1 | 0 | 107 | 7.5 | 105 |
| 1 | 0 | 0 | 0 | 1 | 0 | 108 | 7.5 | 105 |
| 1 | 0 | 0 | 0 | 1 | 0 | 109 | 7.5 | 105 |
| 1 | 0 | 0 | 0 | 1 | 0 | 110 | 7.5 | 105 |
| 1 | 0 | 0 | 0 | 1 | 0 | 111 | 7.5 | 105 |
| 1 | 0 | 0 | 0 | 1 | 0 | 112 | 7.5 | 105 |

|   |   |   |   |   |   |     |     |     |
|---|---|---|---|---|---|-----|-----|-----|
| 1 | 0 | 0 | 0 | 1 | 0 | 113 | 7.5 | 105 |
| 1 | 0 | 0 | 0 | 1 | 0 | 114 | 7.5 | 105 |
| 1 | 0 | 0 | 0 | 1 | 0 | 115 | 7.5 | 105 |
| 1 | 0 | 0 | 0 | 1 | 0 | 116 | 7.5 | 105 |
| 1 | 0 | 0 | 0 | 1 | 0 | 117 | 7.5 | 105 |
| 1 | 0 | 0 | 0 | 1 | 0 | 118 | 7.5 | 105 |
| 1 | 0 | 0 | 0 | 1 | 0 | 119 | 7.5 | 105 |
| 1 | 0 | 0 | 0 | 1 | 0 | 120 | 7.5 | 105 |
| 1 | 0 | 0 | 0 | 1 | 0 | 121 | 7.5 | 105 |
| 1 | 0 | 0 | 0 | 1 | 0 | 122 | 7.5 | 105 |
| 1 | 0 | 0 | 0 | 1 | 0 | 123 | 7.5 | 105 |
| 1 | 0 | 0 | 0 | 1 | 0 | 124 | 7.5 | 105 |
| 1 | 0 | 0 | 0 | 1 | 0 | 125 | 7.5 | 105 |
| 1 | 0 | 0 | 0 | 1 | 0 | 126 | 7.5 | 105 |
| 1 | 0 | 0 | 0 | 1 | 0 | 127 | 7.5 | 105 |
| 1 | 0 | 0 | 0 | 1 | 0 | 128 | 7.5 | 105 |
| 1 | 0 | 0 | 0 | 1 | 0 | 129 | 7.5 | 105 |
| 1 | 0 | 0 | 0 | 1 | 0 | 130 | 7.5 | 105 |
| 1 | 0 | 0 | 0 | 1 | 0 | 131 | 7.5 | 105 |
| 1 | 0 | 0 | 0 | 1 | 0 | 132 | 7.5 | 105 |
| 1 | 0 | 0 | 0 | 1 | 0 | 133 | 7.5 | 105 |
| 1 | 0 | 0 | 0 | 1 | 0 | 134 | 7.5 | 105 |
| 1 | 0 | 0 | 0 | 1 | 0 | 135 | 7.5 | 105 |
| 1 | 0 | 0 | 0 | 1 | 0 | 136 | 7.5 | 165 |
| 1 | 0 | 0 | 0 | 1 | 0 | 137 | 7.5 | 165 |
| 1 | 0 | 0 | 0 | 1 | 0 | 138 | 7.5 | 165 |
| 1 | 0 | 0 | 0 | 1 | 0 | 139 | 7.5 | 165 |
| 1 | 0 | 0 | 0 | 1 | 0 | 140 | 7.5 | 165 |
| 1 | 0 | 0 | 0 | 1 | 0 | 141 | 7.5 | 165 |
| 1 | 0 | 0 | 0 | 1 | 0 | 142 | 7.5 | 165 |
| 1 | 0 | 0 | 0 | 1 | 0 | 143 | 7.5 | 165 |
| 1 | 0 | 0 | 0 | 1 | 0 | 144 | 7.5 | 165 |
| 1 | 0 | 0 | 0 | 1 | 0 | 145 | 7.5 | 165 |
| 1 | 0 | 0 | 0 | 1 | 0 | 146 | 7.5 | 165 |
| 1 | 0 | 0 | 0 | 1 | 0 | 147 | 7.5 | 165 |
| 1 | 0 | 0 | 0 | 1 | 0 | 148 | 7.5 | 165 |
| 1 | 0 | 0 | 0 | 1 | 0 | 149 | 7.5 | 165 |
| 1 | 0 | 0 | 0 | 1 | 0 | 150 | 7.5 | 165 |
| 1 | 0 | 0 | 0 | 1 | 0 | 151 | 7.5 | 165 |
| 1 | 0 | 0 | 0 | 1 | 0 | 152 | 7.5 | 165 |
| 1 | 0 | 0 | 0 | 1 | 0 | 153 | 7.5 | 165 |
| 1 | 0 | 0 | 0 | 1 | 0 | 154 | 7.5 | 165 |
| 1 | 0 | 0 | 0 | 1 | 0 | 155 | 7.5 | 165 |
| 1 | 0 | 0 | 0 | 1 | 0 | 156 | 7.5 | 165 |
| 1 | 0 | 0 | 0 | 1 | 0 | 157 | 7.5 | 165 |
| 1 | 0 | 0 | 0 | 1 | 0 | 158 | 7.5 | 165 |

|   |   |   |   |   |   |     |     |     |
|---|---|---|---|---|---|-----|-----|-----|
| 1 | 0 | 0 | 0 | 1 | 0 | 159 | 7.5 | 165 |
| 1 | 0 | 0 | 0 | 1 | 0 | 160 | 7.5 | 165 |
| 1 | 0 | 0 | 0 | 1 | 0 | 161 | 7.5 | 165 |
| 1 | 0 | 0 | 0 | 1 | 0 | 162 | 7.5 | 165 |
| 1 | 0 | 0 | 0 | 1 | 0 | 163 | 7.5 | 165 |
| 1 | 0 | 0 | 0 | 1 | 0 | 164 | 7.5 | 165 |
| 1 | 0 | 0 | 0 | 1 | 0 | 165 | 7.5 | 165 |
| 1 | 0 | 0 | 0 | 1 | 0 | 166 | 7.5 | 165 |
| 1 | 0 | 0 | 0 | 1 | 0 | 167 | 7.5 | 165 |
| 1 | 0 | 0 | 0 | 1 | 0 | 168 | 7.5 | 165 |
| 1 | 0 | 0 | 0 | 1 | 0 | 169 | 7.5 | 165 |
| 1 | 0 | 0 | 0 | 1 | 0 | 170 | 7.5 | 165 |
| 1 | 0 | 0 | 0 | 1 | 0 | 171 | 7.5 | 165 |
| 1 | 0 | 0 | 0 | 1 | 0 | 172 | 7.5 | 165 |
| 1 | 0 | 0 | 0 | 1 | 0 | 173 | 7.5 | 165 |
| 1 | 0 | 0 | 0 | 1 | 0 | 174 | 7.5 | 165 |
| 1 | 0 | 0 | 0 | 1 | 0 | 175 | 7.5 | 165 |
| 1 | 0 | 0 | 0 | 1 | 0 | 176 | 7.5 | 165 |
| 1 | 0 | 0 | 0 | 1 | 0 | 177 | 7.5 | 165 |
| 1 | 0 | 0 | 0 | 1 | 0 | 178 | 7.5 | 165 |
| 1 | 0 | 0 | 0 | 1 | 0 | 179 | 7.5 | 165 |
| 1 | 0 | 0 | 0 | 1 | 0 | 180 | 7.5 | 180 |
| 1 | 0 | 0 | 0 | 0 | 1 | 0   | 7.5 | 45  |
| 1 | 0 | 0 | 0 | 0 | 1 | 1   | 7.5 | 45  |
| 1 | 0 | 0 | 0 | 0 | 1 | 2   | 7.5 | 45  |
| 1 | 0 | 0 | 0 | 0 | 1 | 3   | 7.5 | 45  |
| 1 | 0 | 0 | 0 | 0 | 1 | 4   | 7.5 | 45  |
| 1 | 0 | 0 | 0 | 0 | 1 | 5   | 7.5 | 45  |
| 1 | 0 | 0 | 0 | 0 | 1 | 6   | 7.5 | 45  |
| 1 | 0 | 0 | 0 | 0 | 1 | 7   | 7.5 | 45  |
| 1 | 0 | 0 | 0 | 0 | 1 | 8   | 7.5 | 45  |
| 1 | 0 | 0 | 0 | 0 | 1 | 9   | 7.5 | 45  |
| 1 | 0 | 0 | 0 | 0 | 1 | 10  | 7.5 | 45  |
| 1 | 0 | 0 | 0 | 0 | 1 | 11  | 7.5 | 45  |
| 1 | 0 | 0 | 0 | 0 | 1 | 12  | 7.5 | 45  |
| 1 | 0 | 0 | 0 | 0 | 1 | 13  | 7.5 | 45  |
| 1 | 0 | 0 | 0 | 0 | 1 | 14  | 7.5 | 45  |
| 1 | 0 | 0 | 0 | 0 | 1 | 15  | 7.5 | 45  |
| 1 | 0 | 0 | 0 | 0 | 1 | 16  | 7.5 | 45  |
| 1 | 0 | 0 | 0 | 0 | 1 | 17  | 7.5 | 45  |
| 1 | 0 | 0 | 0 | 0 | 1 | 18  | 7.5 | 45  |
| 1 | 0 | 0 | 0 | 0 | 1 | 19  | 7.5 | 45  |
| 1 | 0 | 0 | 0 | 0 | 1 | 20  | 7.5 | 45  |
| 1 | 0 | 0 | 0 | 0 | 1 | 21  | 7.5 | 45  |
| 1 | 0 | 0 | 0 | 0 | 1 | 22  | 7.5 | 45  |
| 1 | 0 | 0 | 0 | 0 | 1 | 23  | 7.5 | 45  |

|   |   |   |   |   |   |    |     |    |
|---|---|---|---|---|---|----|-----|----|
| 1 | 0 | 0 | 0 | 0 | 1 | 24 | 7.5 | 45 |
| 1 | 0 | 0 | 0 | 0 | 1 | 25 | 7.5 | 45 |
| 1 | 0 | 0 | 0 | 0 | 1 | 26 | 7.5 | 45 |
| 1 | 0 | 0 | 0 | 0 | 1 | 27 | 7.5 | 45 |
| 1 | 0 | 0 | 0 | 0 | 1 | 28 | 7.5 | 45 |
| 1 | 0 | 0 | 0 | 0 | 1 | 29 | 7.5 | 45 |
| 1 | 0 | 0 | 0 | 0 | 1 | 30 | 7.5 | 45 |
| 1 | 0 | 0 | 0 | 0 | 1 | 31 | 7.5 | 45 |
| 1 | 0 | 0 | 0 | 0 | 1 | 32 | 7.5 | 45 |
| 1 | 0 | 0 | 0 | 0 | 1 | 33 | 7.5 | 45 |
| 1 | 0 | 0 | 0 | 0 | 1 | 34 | 7.5 | 45 |
| 1 | 0 | 0 | 0 | 0 | 1 | 35 | 7.5 | 45 |
| 1 | 0 | 0 | 0 | 0 | 1 | 36 | 7.5 | 45 |
| 1 | 0 | 0 | 0 | 0 | 1 | 37 | 7.5 | 45 |
| 1 | 0 | 0 | 0 | 0 | 1 | 38 | 7.5 | 45 |
| 1 | 0 | 0 | 0 | 0 | 1 | 39 | 7.5 | 45 |
| 1 | 0 | 0 | 0 | 0 | 1 | 40 | 7.5 | 45 |
| 1 | 0 | 0 | 0 | 0 | 1 | 41 | 7.5 | 45 |
| 1 | 0 | 0 | 0 | 0 | 1 | 42 | 7.5 | 45 |
| 1 | 0 | 0 | 0 | 0 | 1 | 43 | 7.5 | 45 |
| 1 | 0 | 0 | 0 | 0 | 1 | 44 | 7.5 | 45 |
| 1 | 0 | 0 | 0 | 0 | 1 | 45 | 7.5 | 45 |
| 1 | 0 | 0 | 0 | 0 | 1 | 46 | 7.5 | 45 |
| 1 | 0 | 0 | 0 | 0 | 1 | 47 | 7.5 | 45 |
| 1 | 0 | 0 | 0 | 0 | 1 | 48 | 7.5 | 45 |
| 1 | 0 | 0 | 0 | 0 | 1 | 49 | 7.5 | 45 |
| 1 | 0 | 0 | 0 | 0 | 1 | 50 | 7.5 | 45 |
| 1 | 0 | 0 | 0 | 0 | 1 | 51 | 7.5 | 45 |
| 1 | 0 | 0 | 0 | 0 | 1 | 52 | 7.5 | 45 |
| 1 | 0 | 0 | 0 | 0 | 1 | 53 | 7.5 | 45 |
| 1 | 0 | 0 | 0 | 0 | 1 | 54 | 7.5 | 45 |
| 1 | 0 | 0 | 0 | 0 | 1 | 55 | 7.5 | 45 |
| 1 | 0 | 0 | 0 | 0 | 1 | 56 | 7.5 | 45 |
| 1 | 0 | 0 | 0 | 0 | 1 | 57 | 7.5 | 45 |
| 1 | 0 | 0 | 0 | 0 | 1 | 58 | 7.5 | 45 |
| 1 | 0 | 0 | 0 | 0 | 1 | 59 | 7.5 | 45 |
| 1 | 0 | 0 | 0 | 0 | 1 | 60 | 7.5 | 60 |
| 1 | 0 | 0 | 0 | 0 | 1 | 61 | 7.5 | 75 |
| 1 | 0 | 0 | 0 | 0 | 1 | 62 | 7.5 | 75 |
| 1 | 0 | 0 | 0 | 0 | 1 | 63 | 7.5 | 75 |
| 1 | 0 | 0 | 0 | 0 | 1 | 64 | 7.5 | 75 |
| 1 | 0 | 0 | 0 | 0 | 1 | 65 | 7.5 | 75 |
| 1 | 0 | 0 | 0 | 0 | 1 | 66 | 7.5 | 75 |
| 1 | 0 | 0 | 0 | 0 | 1 | 67 | 7.5 | 75 |
| 1 | 0 | 0 | 0 | 0 | 1 | 68 | 7.5 | 75 |
| 1 | 0 | 0 | 0 | 0 | 1 | 69 | 7.5 | 75 |

|   |   |   |   |   |   |     |     |     |
|---|---|---|---|---|---|-----|-----|-----|
| 1 | 0 | 0 | 0 | 0 | 1 | 70  | 7.5 | 75  |
| 1 | 0 | 0 | 0 | 0 | 1 | 71  | 7.5 | 75  |
| 1 | 0 | 0 | 0 | 0 | 1 | 72  | 7.5 | 75  |
| 1 | 0 | 0 | 0 | 0 | 1 | 73  | 7.5 | 75  |
| 1 | 0 | 0 | 0 | 0 | 1 | 74  | 7.5 | 75  |
| 1 | 0 | 0 | 0 | 0 | 1 | 75  | 7.5 | 75  |
| 1 | 0 | 0 | 0 | 0 | 1 | 76  | 7.5 | 75  |
| 1 | 0 | 0 | 0 | 0 | 1 | 77  | 7.5 | 75  |
| 1 | 0 | 0 | 0 | 0 | 1 | 78  | 7.5 | 75  |
| 1 | 0 | 0 | 0 | 0 | 1 | 79  | 7.5 | 75  |
| 1 | 0 | 0 | 0 | 0 | 1 | 80  | 7.5 | 75  |
| 1 | 0 | 0 | 0 | 0 | 1 | 81  | 7.5 | 75  |
| 1 | 0 | 0 | 0 | 0 | 1 | 82  | 7.5 | 75  |
| 1 | 0 | 0 | 0 | 0 | 1 | 83  | 7.5 | 75  |
| 1 | 0 | 0 | 0 | 0 | 1 | 84  | 7.5 | 75  |
| 1 | 0 | 0 | 0 | 0 | 1 | 85  | 7.5 | 75  |
| 1 | 0 | 0 | 0 | 0 | 1 | 86  | 7.5 | 75  |
| 1 | 0 | 0 | 0 | 0 | 1 | 87  | 7.5 | 75  |
| 1 | 0 | 0 | 0 | 0 | 1 | 88  | 7.5 | 75  |
| 1 | 0 | 0 | 0 | 0 | 1 | 89  | 7.5 | 75  |
| 1 | 0 | 0 | 0 | 0 | 1 | 90  | 7.5 | 90  |
| 1 | 0 | 0 | 0 | 0 | 1 | 91  | 7.5 | 105 |
| 1 | 0 | 0 | 0 | 0 | 1 | 92  | 7.5 | 105 |
| 1 | 0 | 0 | 0 | 0 | 1 | 93  | 7.5 | 105 |
| 1 | 0 | 0 | 0 | 0 | 1 | 94  | 7.5 | 105 |
| 1 | 0 | 0 | 0 | 0 | 1 | 95  | 7.5 | 105 |
| 1 | 0 | 0 | 0 | 0 | 1 | 96  | 7.5 | 105 |
| 1 | 0 | 0 | 0 | 0 | 1 | 97  | 7.5 | 105 |
| 1 | 0 | 0 | 0 | 0 | 1 | 98  | 7.5 | 105 |
| 1 | 0 | 0 | 0 | 0 | 1 | 99  | 7.5 | 105 |
| 1 | 0 | 0 | 0 | 0 | 1 | 100 | 7.5 | 105 |
| 1 | 0 | 0 | 0 | 0 | 1 | 101 | 7.5 | 105 |
| 1 | 0 | 0 | 0 | 0 | 1 | 102 | 7.5 | 105 |
| 1 | 0 | 0 | 0 | 0 | 1 | 103 | 7.5 | 105 |
| 1 | 0 | 0 | 0 | 0 | 1 | 104 | 7.5 | 105 |
| 1 | 0 | 0 | 0 | 0 | 1 | 105 | 7.5 | 105 |
| 1 | 0 | 0 | 0 | 0 | 1 | 106 | 7.5 | 105 |
| 1 | 0 | 0 | 0 | 0 | 1 | 107 | 7.5 | 105 |
| 1 | 0 | 0 | 0 | 0 | 1 | 108 | 7.5 | 105 |
| 1 | 0 | 0 | 0 | 0 | 1 | 109 | 7.5 | 105 |
| 1 | 0 | 0 | 0 | 0 | 1 | 110 | 7.5 | 105 |
| 1 | 0 | 0 | 0 | 0 | 1 | 111 | 7.5 | 105 |
| 1 | 0 | 0 | 0 | 0 | 1 | 112 | 7.5 | 105 |
| 1 | 0 | 0 | 0 | 0 | 1 | 113 | 7.5 | 105 |
| 1 | 0 | 0 | 0 | 0 | 1 | 114 | 7.5 | 105 |
| 1 | 0 | 0 | 0 | 0 | 1 | 115 | 7.5 | 105 |

|   |   |   |   |   |   |     |     |     |
|---|---|---|---|---|---|-----|-----|-----|
| 1 | 0 | 0 | 0 | 0 | 1 | 116 | 7.5 | 105 |
| 1 | 0 | 0 | 0 | 0 | 1 | 117 | 7.5 | 105 |
| 1 | 0 | 0 | 0 | 0 | 1 | 118 | 7.5 | 105 |
| 1 | 0 | 0 | 0 | 0 | 1 | 119 | 7.5 | 105 |
| 1 | 0 | 0 | 0 | 0 | 1 | 120 | 7.5 | 120 |
| 1 | 0 | 0 | 0 | 0 | 1 | 121 | 7.5 | 135 |
| 1 | 0 | 0 | 0 | 0 | 1 | 122 | 7.5 | 135 |
| 1 | 0 | 0 | 0 | 0 | 1 | 123 | 7.5 | 135 |
| 1 | 0 | 0 | 0 | 0 | 1 | 124 | 7.5 | 135 |
| 1 | 0 | 0 | 0 | 0 | 1 | 125 | 7.5 | 135 |
| 1 | 0 | 0 | 0 | 0 | 1 | 126 | 7.5 | 135 |
| 1 | 0 | 0 | 0 | 0 | 1 | 127 | 7.5 | 135 |
| 1 | 0 | 0 | 0 | 0 | 1 | 128 | 7.5 | 135 |
| 1 | 0 | 0 | 0 | 0 | 1 | 129 | 7.5 | 135 |
| 1 | 0 | 0 | 0 | 0 | 1 | 130 | 7.5 | 135 |
| 1 | 0 | 0 | 0 | 0 | 1 | 131 | 7.5 | 135 |
| 1 | 0 | 0 | 0 | 0 | 1 | 132 | 7.5 | 135 |
| 1 | 0 | 0 | 0 | 0 | 1 | 133 | 7.5 | 135 |
| 1 | 0 | 0 | 0 | 0 | 1 | 134 | 7.5 | 135 |
| 1 | 0 | 0 | 0 | 0 | 1 | 135 | 7.5 | 135 |
| 1 | 0 | 0 | 0 | 0 | 1 | 136 | 7.5 | 135 |
| 1 | 0 | 0 | 0 | 0 | 1 | 137 | 7.5 | 135 |
| 1 | 0 | 0 | 0 | 0 | 1 | 138 | 7.5 | 135 |
| 1 | 0 | 0 | 0 | 0 | 1 | 139 | 7.5 | 135 |
| 1 | 0 | 0 | 0 | 0 | 1 | 140 | 7.5 | 135 |
| 1 | 0 | 0 | 0 | 0 | 1 | 141 | 7.5 | 135 |
| 1 | 0 | 0 | 0 | 0 | 1 | 142 | 7.5 | 135 |
| 1 | 0 | 0 | 0 | 0 | 1 | 143 | 7.5 | 135 |
| 1 | 0 | 0 | 0 | 0 | 1 | 144 | 7.5 | 135 |
| 1 | 0 | 0 | 0 | 0 | 1 | 145 | 7.5 | 135 |
| 1 | 0 | 0 | 0 | 0 | 1 | 146 | 7.5 | 135 |
| 1 | 0 | 0 | 0 | 0 | 1 | 147 | 7.5 | 135 |
| 1 | 0 | 0 | 0 | 0 | 1 | 148 | 7.5 | 135 |
| 1 | 0 | 0 | 0 | 0 | 1 | 149 | 7.5 | 135 |
| 1 | 0 | 0 | 0 | 0 | 1 | 150 | 7.5 | 135 |
| 1 | 0 | 0 | 0 | 0 | 1 | 151 | 7.5 | 135 |
| 1 | 0 | 0 | 0 | 0 | 1 | 152 | 7.5 | 135 |
| 1 | 0 | 0 | 0 | 0 | 1 | 153 | 7.5 | 135 |
| 1 | 0 | 0 | 0 | 0 | 1 | 154 | 7.5 | 135 |
| 1 | 0 | 0 | 0 | 0 | 1 | 155 | 7.5 | 135 |
| 1 | 0 | 0 | 0 | 0 | 1 | 156 | 7.5 | 135 |
| 1 | 0 | 0 | 0 | 0 | 1 | 157 | 7.5 | 135 |
| 1 | 0 | 0 | 0 | 0 | 1 | 158 | 7.5 | 135 |
| 1 | 0 | 0 | 0 | 0 | 1 | 159 | 7.5 | 135 |
| 1 | 0 | 0 | 0 | 0 | 1 | 160 | 7.5 | 135 |
| 1 | 0 | 0 | 0 | 0 | 1 | 161 | 7.5 | 135 |

|   |   |   |   |   |   |     |     |     |
|---|---|---|---|---|---|-----|-----|-----|
| 1 | 0 | 0 | 0 | 0 | 1 | 162 | 7.5 | 135 |
| 1 | 0 | 0 | 0 | 0 | 1 | 163 | 7.5 | 135 |
| 1 | 0 | 0 | 0 | 0 | 1 | 164 | 7.5 | 135 |
| 1 | 0 | 0 | 0 | 0 | 1 | 165 | 7.5 | 135 |
| 1 | 0 | 0 | 0 | 0 | 1 | 166 | 7.5 | 135 |
| 1 | 0 | 0 | 0 | 0 | 1 | 167 | 7.5 | 135 |
| 1 | 0 | 0 | 0 | 0 | 1 | 168 | 7.5 | 135 |
| 1 | 0 | 0 | 0 | 0 | 1 | 169 | 7.5 | 135 |
| 1 | 0 | 0 | 0 | 0 | 1 | 170 | 7.5 | 135 |
| 1 | 0 | 0 | 0 | 0 | 1 | 171 | 7.5 | 135 |
| 1 | 0 | 0 | 0 | 0 | 1 | 172 | 7.5 | 135 |
| 1 | 0 | 0 | 0 | 0 | 1 | 173 | 7.5 | 135 |
| 1 | 0 | 0 | 0 | 0 | 1 | 174 | 7.5 | 135 |
| 1 | 0 | 0 | 0 | 0 | 1 | 175 | 7.5 | 135 |
| 1 | 0 | 0 | 0 | 0 | 1 | 176 | 7.5 | 135 |
| 1 | 0 | 0 | 0 | 0 | 1 | 177 | 7.5 | 135 |
| 1 | 0 | 0 | 0 | 0 | 1 | 178 | 7.5 | 135 |
| 1 | 0 | 0 | 0 | 0 | 1 | 179 | 7.5 | 135 |
| 1 | 0 | 0 | 0 | 0 | 1 | 180 | 7.5 | 135 |
| 1 | 1 | 1 | 0 | 0 | 0 | 0   | 7.5 | 105 |
| 1 | 1 | 1 | 0 | 0 | 0 | 1   | 7.5 | 105 |
| 1 | 1 | 1 | 0 | 0 | 0 | 2   | 7.5 | 105 |
| 1 | 1 | 1 | 0 | 0 | 0 | 3   | 7.5 | 105 |
| 1 | 1 | 1 | 0 | 0 | 0 | 4   | 7.5 | 105 |
| 1 | 1 | 1 | 0 | 0 | 0 | 5   | 7.5 | 105 |
| 1 | 1 | 1 | 0 | 0 | 0 | 6   | 7.5 | 105 |
| 1 | 1 | 1 | 0 | 0 | 0 | 7   | 7.5 | 105 |
| 1 | 1 | 1 | 0 | 0 | 0 | 8   | 7.5 | 105 |
| 1 | 1 | 1 | 0 | 0 | 0 | 9   | 7.5 | 105 |
| 1 | 1 | 1 | 0 | 0 | 0 | 10  | 7.5 | 105 |
| 1 | 1 | 1 | 0 | 0 | 0 | 11  | 7.5 | 105 |
| 1 | 1 | 1 | 0 | 0 | 0 | 12  | 7.5 | 105 |
| 1 | 1 | 1 | 0 | 0 | 0 | 13  | 7.5 | 105 |
| 1 | 1 | 1 | 0 | 0 | 0 | 14  | 7.5 | 105 |
| 1 | 1 | 1 | 0 | 0 | 0 | 15  | 7.5 | 105 |
| 1 | 1 | 1 | 0 | 0 | 0 | 16  | 7.5 | 105 |
| 1 | 1 | 1 | 0 | 0 | 0 | 17  | 7.5 | 105 |
| 1 | 1 | 1 | 0 | 0 | 0 | 18  | 7.5 | 105 |
| 1 | 1 | 1 | 0 | 0 | 0 | 19  | 7.5 | 105 |
| 1 | 1 | 1 | 0 | 0 | 0 | 20  | 7.5 | 105 |
| 1 | 1 | 1 | 0 | 0 | 0 | 21  | 7.5 | 105 |
| 1 | 1 | 1 | 0 | 0 | 0 | 22  | 7.5 | 105 |
| 1 | 1 | 1 | 0 | 0 | 0 | 23  | 7.5 | 105 |
| 1 | 1 | 1 | 0 | 0 | 0 | 24  | 7.5 | 105 |
| 1 | 1 | 1 | 0 | 0 | 0 | 25  | 7.5 | 105 |
| 1 | 1 | 1 | 0 | 0 | 0 | 26  | 7.5 | 105 |

|   |   |   |   |   |   |    |     |     |
|---|---|---|---|---|---|----|-----|-----|
| 1 | 1 | 1 | 0 | 0 | 0 | 27 | 7.5 | 105 |
| 1 | 1 | 1 | 0 | 0 | 0 | 28 | 7.5 | 105 |
| 1 | 1 | 1 | 0 | 0 | 0 | 29 | 7.5 | 105 |
| 1 | 1 | 1 | 0 | 0 | 0 | 30 | 7.5 | 105 |
| 1 | 1 | 1 | 0 | 0 | 0 | 31 | 7.5 | 105 |
| 1 | 1 | 1 | 0 | 0 | 0 | 32 | 7.5 | 105 |
| 1 | 1 | 1 | 0 | 0 | 0 | 33 | 7.5 | 105 |
| 1 | 1 | 1 | 0 | 0 | 0 | 34 | 7.5 | 105 |
| 1 | 1 | 1 | 0 | 0 | 0 | 35 | 7.5 | 105 |
| 1 | 1 | 1 | 0 | 0 | 0 | 36 | 7.5 | 105 |
| 1 | 1 | 1 | 0 | 0 | 0 | 37 | 7.5 | 105 |
| 1 | 1 | 1 | 0 | 0 | 0 | 38 | 7.5 | 105 |
| 1 | 1 | 1 | 0 | 0 | 0 | 39 | 7.5 | 105 |
| 1 | 1 | 1 | 0 | 0 | 0 | 40 | 7.5 | 105 |
| 1 | 1 | 1 | 0 | 0 | 0 | 41 | 7.5 | 105 |
| 1 | 1 | 1 | 0 | 0 | 0 | 42 | 7.5 | 105 |
| 1 | 1 | 1 | 0 | 0 | 0 | 43 | 7.5 | 105 |
| 1 | 1 | 1 | 0 | 0 | 0 | 44 | 7.5 | 105 |
| 1 | 1 | 1 | 0 | 0 | 0 | 45 | 7.5 | 105 |
| 1 | 1 | 1 | 0 | 0 | 0 | 46 | 7.5 | 105 |
| 1 | 1 | 1 | 0 | 0 | 0 | 47 | 7.5 | 105 |
| 1 | 1 | 1 | 0 | 0 | 0 | 48 | 7.5 | 105 |
| 1 | 1 | 1 | 0 | 0 | 0 | 49 | 7.5 | 105 |
| 1 | 1 | 1 | 0 | 0 | 0 | 50 | 7.5 | 105 |
| 1 | 1 | 1 | 0 | 0 | 0 | 51 | 7.5 | 105 |
| 1 | 1 | 1 | 0 | 0 | 0 | 52 | 7.5 | 105 |
| 1 | 1 | 1 | 0 | 0 | 0 | 53 | 7.5 | 105 |
| 1 | 1 | 1 | 0 | 0 | 0 | 54 | 7.5 | 105 |
| 1 | 1 | 1 | 0 | 0 | 0 | 55 | 7.5 | 105 |
| 1 | 1 | 1 | 0 | 0 | 0 | 56 | 7.5 | 105 |
| 1 | 1 | 1 | 0 | 0 | 0 | 57 | 7.5 | 105 |
| 1 | 1 | 1 | 0 | 0 | 0 | 58 | 7.5 | 105 |
| 1 | 1 | 1 | 0 | 0 | 0 | 59 | 7.5 | 105 |
| 1 | 1 | 1 | 0 | 0 | 0 | 60 | 7.5 | 105 |
| 1 | 1 | 1 | 0 | 0 | 0 | 61 | 7.5 | 105 |
| 1 | 1 | 1 | 0 | 0 | 0 | 62 | 7.5 | 105 |
| 1 | 1 | 1 | 0 | 0 | 0 | 63 | 7.5 | 105 |
| 1 | 1 | 1 | 0 | 0 | 0 | 64 | 7.5 | 105 |
| 1 | 1 | 1 | 0 | 0 | 0 | 65 | 7.5 | 105 |
| 1 | 1 | 1 | 0 | 0 | 0 | 66 | 7.5 | 105 |
| 1 | 1 | 1 | 0 | 0 | 0 | 67 | 7.5 | 105 |
| 1 | 1 | 1 | 0 | 0 | 0 | 68 | 7.5 | 105 |
| 1 | 1 | 1 | 0 | 0 | 0 | 69 | 7.5 | 105 |
| 1 | 1 | 1 | 0 | 0 | 0 | 70 | 7.5 | 105 |
| 1 | 1 | 1 | 0 | 0 | 0 | 71 | 7.5 | 105 |
| 1 | 1 | 1 | 0 | 0 | 0 | 72 | 7.5 | 105 |

|   |   |   |   |   |   |     |     |     |
|---|---|---|---|---|---|-----|-----|-----|
| 1 | 1 | 1 | 0 | 0 | 0 | 73  | 7.5 | 105 |
| 1 | 1 | 1 | 0 | 0 | 0 | 74  | 7.5 | 105 |
| 1 | 1 | 1 | 0 | 0 | 0 | 75  | 7.5 | 105 |
| 1 | 1 | 1 | 0 | 0 | 0 | 76  | 7.5 | 105 |
| 1 | 1 | 1 | 0 | 0 | 0 | 77  | 7.5 | 105 |
| 1 | 1 | 1 | 0 | 0 | 0 | 78  | 7.5 | 105 |
| 1 | 1 | 1 | 0 | 0 | 0 | 79  | 7.5 | 105 |
| 1 | 1 | 1 | 0 | 0 | 0 | 80  | 7.5 | 105 |
| 1 | 1 | 1 | 0 | 0 | 0 | 81  | 7.5 | 105 |
| 1 | 1 | 1 | 0 | 0 | 0 | 82  | 7.5 | 105 |
| 1 | 1 | 1 | 0 | 0 | 0 | 83  | 7.5 | 105 |
| 1 | 1 | 1 | 0 | 0 | 0 | 84  | 7.5 | 105 |
| 1 | 1 | 1 | 0 | 0 | 0 | 85  | 7.5 | 105 |
| 1 | 1 | 1 | 0 | 0 | 0 | 86  | 7.5 | 105 |
| 1 | 1 | 1 | 0 | 0 | 0 | 87  | 7.5 | 105 |
| 1 | 1 | 1 | 0 | 0 | 0 | 88  | 7.5 | 105 |
| 1 | 1 | 1 | 0 | 0 | 0 | 89  | 7.5 | 105 |
| 1 | 1 | 1 | 0 | 0 | 0 | 90  | 7.5 | 105 |
| 1 | 1 | 1 | 0 | 0 | 0 | 91  | 7.5 | 105 |
| 1 | 1 | 1 | 0 | 0 | 0 | 92  | 7.5 | 105 |
| 1 | 1 | 1 | 0 | 0 | 0 | 93  | 7.5 | 105 |
| 1 | 1 | 1 | 0 | 0 | 0 | 94  | 7.5 | 105 |
| 1 | 1 | 1 | 0 | 0 | 0 | 95  | 7.5 | 105 |
| 1 | 1 | 1 | 0 | 0 | 0 | 96  | 7.5 | 105 |
| 1 | 1 | 1 | 0 | 0 | 0 | 97  | 7.5 | 105 |
| 1 | 1 | 1 | 0 | 0 | 0 | 98  | 7.5 | 105 |
| 1 | 1 | 1 | 0 | 0 | 0 | 99  | 7.5 | 105 |
| 1 | 1 | 1 | 0 | 0 | 0 | 100 | 7.5 | 105 |
| 1 | 1 | 1 | 0 | 0 | 0 | 101 | 7.5 | 105 |
| 1 | 1 | 1 | 0 | 0 | 0 | 102 | 7.5 | 105 |
| 1 | 1 | 1 | 0 | 0 | 0 | 103 | 7.5 | 105 |
| 1 | 1 | 1 | 0 | 0 | 0 | 104 | 7.5 | 105 |
| 1 | 1 | 1 | 0 | 0 | 0 | 105 | 7.5 | 105 |
| 1 | 1 | 1 | 0 | 0 | 0 | 106 | 7.5 | 105 |
| 1 | 1 | 1 | 0 | 0 | 0 | 107 | 7.5 | 105 |
| 1 | 1 | 1 | 0 | 0 | 0 | 108 | 7.5 | 105 |
| 1 | 1 | 1 | 0 | 0 | 0 | 109 | 7.5 | 105 |
| 1 | 1 | 1 | 0 | 0 | 0 | 110 | 7.5 | 105 |
| 1 | 1 | 1 | 0 | 0 | 0 | 111 | 7.5 | 105 |
| 1 | 1 | 1 | 0 | 0 | 0 | 112 | 7.5 | 105 |
| 1 | 1 | 1 | 0 | 0 | 0 | 113 | 7.5 | 105 |
| 1 | 1 | 1 | 0 | 0 | 0 | 114 | 7.5 | 105 |
| 1 | 1 | 1 | 0 | 0 | 0 | 115 | 7.5 | 105 |
| 1 | 1 | 1 | 0 | 0 | 0 | 116 | 7.5 | 105 |
| 1 | 1 | 1 | 0 | 0 | 0 | 117 | 7.5 | 105 |
| 1 | 1 | 1 | 0 | 0 | 0 | 118 | 7.5 | 105 |

|   |   |   |   |   |   |     |     |     |
|---|---|---|---|---|---|-----|-----|-----|
| 1 | 1 | 1 | 0 | 0 | 0 | 119 | 7.5 | 105 |
| 1 | 1 | 1 | 0 | 0 | 0 | 120 | 7.5 | 120 |
| 1 | 1 | 1 | 0 | 0 | 0 | 121 | 7.5 | 135 |
| 1 | 1 | 1 | 0 | 0 | 0 | 122 | 7.5 | 135 |
| 1 | 1 | 1 | 0 | 0 | 0 | 123 | 7.5 | 135 |
| 1 | 1 | 1 | 0 | 0 | 0 | 124 | 7.5 | 135 |
| 1 | 1 | 1 | 0 | 0 | 0 | 125 | 7.5 | 135 |
| 1 | 1 | 1 | 0 | 0 | 0 | 126 | 7.5 | 135 |
| 1 | 1 | 1 | 0 | 0 | 0 | 127 | 7.5 | 135 |
| 1 | 1 | 1 | 0 | 0 | 0 | 128 | 7.5 | 135 |
| 1 | 1 | 1 | 0 | 0 | 0 | 129 | 7.5 | 135 |
| 1 | 1 | 1 | 0 | 0 | 0 | 130 | 7.5 | 135 |
| 1 | 1 | 1 | 0 | 0 | 0 | 131 | 7.5 | 135 |
| 1 | 1 | 1 | 0 | 0 | 0 | 132 | 7.5 | 135 |
| 1 | 1 | 1 | 0 | 0 | 0 | 133 | 7.5 | 135 |
| 1 | 1 | 1 | 0 | 0 | 0 | 134 | 7.5 | 135 |
| 1 | 1 | 1 | 0 | 0 | 0 | 135 | 7.5 | 135 |
| 1 | 1 | 1 | 0 | 0 | 0 | 136 | 7.5 | 135 |
| 1 | 1 | 1 | 0 | 0 | 0 | 137 | 7.5 | 135 |
| 1 | 1 | 1 | 0 | 0 | 0 | 138 | 7.5 | 135 |
| 1 | 1 | 1 | 0 | 0 | 0 | 139 | 7.5 | 135 |
| 1 | 1 | 1 | 0 | 0 | 0 | 140 | 7.5 | 135 |
| 1 | 1 | 1 | 0 | 0 | 0 | 141 | 7.5 | 135 |
| 1 | 1 | 1 | 0 | 0 | 0 | 142 | 7.5 | 135 |
| 1 | 1 | 1 | 0 | 0 | 0 | 143 | 7.5 | 135 |
| 1 | 1 | 1 | 0 | 0 | 0 | 144 | 7.5 | 135 |
| 1 | 1 | 1 | 0 | 0 | 0 | 145 | 7.5 | 135 |
| 1 | 1 | 1 | 0 | 0 | 0 | 146 | 7.5 | 135 |
| 1 | 1 | 1 | 0 | 0 | 0 | 147 | 7.5 | 135 |
| 1 | 1 | 1 | 0 | 0 | 0 | 148 | 7.5 | 135 |
| 1 | 1 | 1 | 0 | 0 | 0 | 149 | 7.5 | 135 |
| 1 | 1 | 1 | 0 | 0 | 0 | 150 | 7.5 | 150 |
| 1 | 1 | 1 | 0 | 0 | 0 | 151 | 7.5 | 165 |
| 1 | 1 | 1 | 0 | 0 | 0 | 152 | 7.5 | 165 |
| 1 | 1 | 1 | 0 | 0 | 0 | 153 | 7.5 | 165 |
| 1 | 1 | 1 | 0 | 0 | 0 | 154 | 7.5 | 165 |
| 1 | 1 | 1 | 0 | 0 | 0 | 155 | 7.5 | 165 |
| 1 | 1 | 1 | 0 | 0 | 0 | 156 | 7.5 | 165 |
| 1 | 1 | 1 | 0 | 0 | 0 | 157 | 7.5 | 165 |
| 1 | 1 | 1 | 0 | 0 | 0 | 158 | 7.5 | 165 |
| 1 | 1 | 1 | 0 | 0 | 0 | 159 | 7.5 | 165 |
| 1 | 1 | 1 | 0 | 0 | 0 | 160 | 7.5 | 165 |
| 1 | 1 | 1 | 0 | 0 | 0 | 161 | 7.5 | 165 |
| 1 | 1 | 1 | 0 | 0 | 0 | 162 | 7.5 | 165 |
| 1 | 1 | 1 | 0 | 0 | 0 | 163 | 7.5 | 165 |
| 1 | 1 | 1 | 0 | 0 | 0 | 164 | 7.5 | 165 |

|   |   |   |   |   |   |     |     |     |
|---|---|---|---|---|---|-----|-----|-----|
| 1 | 1 | 1 | 0 | 0 | 0 | 165 | 7.5 | 165 |
| 1 | 1 | 1 | 0 | 0 | 0 | 166 | 7.5 | 165 |
| 1 | 1 | 1 | 0 | 0 | 0 | 167 | 7.5 | 165 |
| 1 | 1 | 1 | 0 | 0 | 0 | 168 | 7.5 | 165 |
| 1 | 1 | 1 | 0 | 0 | 0 | 169 | 7.5 | 165 |
| 1 | 1 | 1 | 0 | 0 | 0 | 170 | 7.5 | 165 |
| 1 | 1 | 1 | 0 | 0 | 0 | 171 | 7.5 | 165 |
| 1 | 1 | 1 | 0 | 0 | 0 | 172 | 7.5 | 165 |
| 1 | 1 | 1 | 0 | 0 | 0 | 173 | 7.5 | 165 |
| 1 | 1 | 1 | 0 | 0 | 0 | 174 | 7.5 | 165 |
| 1 | 1 | 1 | 0 | 0 | 0 | 175 | 7.5 | 165 |
| 1 | 1 | 1 | 0 | 0 | 0 | 176 | 7.5 | 165 |
| 1 | 1 | 1 | 0 | 0 | 0 | 177 | 7.5 | 165 |
| 1 | 1 | 1 | 0 | 0 | 0 | 178 | 7.5 | 165 |
| 1 | 1 | 1 | 0 | 0 | 0 | 179 | 7.5 | 165 |
| 1 | 1 | 1 | 0 | 0 | 0 | 180 | 7.5 | 180 |
| 1 | 1 | 0 | 1 | 0 | 0 | 0   | 7.5 | 75  |
| 1 | 1 | 0 | 1 | 0 | 0 | 1   | 7.5 | 75  |
| 1 | 1 | 0 | 1 | 0 | 0 | 2   | 7.5 | 75  |
| 1 | 1 | 0 | 1 | 0 | 0 | 3   | 7.5 | 75  |
| 1 | 1 | 0 | 1 | 0 | 0 | 4   | 7.5 | 75  |
| 1 | 1 | 0 | 1 | 0 | 0 | 5   | 7.5 | 75  |
| 1 | 1 | 0 | 1 | 0 | 0 | 6   | 7.5 | 75  |
| 1 | 1 | 0 | 1 | 0 | 0 | 7   | 7.5 | 75  |
| 1 | 1 | 0 | 1 | 0 | 0 | 8   | 7.5 | 75  |
| 1 | 1 | 0 | 1 | 0 | 0 | 9   | 7.5 | 75  |
| 1 | 1 | 0 | 1 | 0 | 0 | 10  | 7.5 | 75  |
| 1 | 1 | 0 | 1 | 0 | 0 | 11  | 7.5 | 75  |
| 1 | 1 | 0 | 1 | 0 | 0 | 12  | 7.5 | 75  |
| 1 | 1 | 0 | 1 | 0 | 0 | 13  | 7.5 | 75  |
| 1 | 1 | 0 | 1 | 0 | 0 | 14  | 7.5 | 75  |
| 1 | 1 | 0 | 1 | 0 | 0 | 15  | 7.5 | 75  |
| 1 | 1 | 0 | 1 | 0 | 0 | 16  | 7.5 | 75  |
| 1 | 1 | 0 | 1 | 0 | 0 | 17  | 7.5 | 75  |
| 1 | 1 | 0 | 1 | 0 | 0 | 18  | 7.5 | 75  |
| 1 | 1 | 0 | 1 | 0 | 0 | 19  | 7.5 | 75  |
| 1 | 1 | 0 | 1 | 0 | 0 | 20  | 7.5 | 75  |
| 1 | 1 | 0 | 1 | 0 | 0 | 21  | 7.5 | 75  |
| 1 | 1 | 0 | 1 | 0 | 0 | 22  | 7.5 | 75  |
| 1 | 1 | 0 | 1 | 0 | 0 | 23  | 7.5 | 75  |
| 1 | 1 | 0 | 1 | 0 | 0 | 24  | 7.5 | 75  |
| 1 | 1 | 0 | 1 | 0 | 0 | 25  | 7.5 | 75  |
| 1 | 1 | 0 | 1 | 0 | 0 | 26  | 7.5 | 75  |
| 1 | 1 | 0 | 1 | 0 | 0 | 27  | 7.5 | 75  |
| 1 | 1 | 0 | 1 | 0 | 0 | 28  | 7.5 | 75  |
| 1 | 1 | 0 | 1 | 0 | 0 | 29  | 7.5 | 75  |

|   |   |   |   |   |   |    |     |    |
|---|---|---|---|---|---|----|-----|----|
| 1 | 1 | 0 | 1 | 0 | 0 | 30 | 7.5 | 75 |
| 1 | 1 | 0 | 1 | 0 | 0 | 31 | 7.5 | 75 |
| 1 | 1 | 0 | 1 | 0 | 0 | 32 | 7.5 | 75 |
| 1 | 1 | 0 | 1 | 0 | 0 | 33 | 7.5 | 75 |
| 1 | 1 | 0 | 1 | 0 | 0 | 34 | 7.5 | 75 |
| 1 | 1 | 0 | 1 | 0 | 0 | 35 | 7.5 | 75 |
| 1 | 1 | 0 | 1 | 0 | 0 | 36 | 7.5 | 75 |
| 1 | 1 | 0 | 1 | 0 | 0 | 37 | 7.5 | 75 |
| 1 | 1 | 0 | 1 | 0 | 0 | 38 | 7.5 | 75 |
| 1 | 1 | 0 | 1 | 0 | 0 | 39 | 7.5 | 75 |
| 1 | 1 | 0 | 1 | 0 | 0 | 40 | 7.5 | 75 |
| 1 | 1 | 0 | 1 | 0 | 0 | 41 | 7.5 | 75 |
| 1 | 1 | 0 | 1 | 0 | 0 | 42 | 7.5 | 75 |
| 1 | 1 | 0 | 1 | 0 | 0 | 43 | 7.5 | 75 |
| 1 | 1 | 0 | 1 | 0 | 0 | 44 | 7.5 | 75 |
| 1 | 1 | 0 | 1 | 0 | 0 | 45 | 7.5 | 75 |
| 1 | 1 | 0 | 1 | 0 | 0 | 46 | 7.5 | 75 |
| 1 | 1 | 0 | 1 | 0 | 0 | 47 | 7.5 | 75 |
| 1 | 1 | 0 | 1 | 0 | 0 | 48 | 7.5 | 75 |
| 1 | 1 | 0 | 1 | 0 | 0 | 49 | 7.5 | 75 |
| 1 | 1 | 0 | 1 | 0 | 0 | 50 | 7.5 | 75 |
| 1 | 1 | 0 | 1 | 0 | 0 | 51 | 7.5 | 75 |
| 1 | 1 | 0 | 1 | 0 | 0 | 52 | 7.5 | 75 |
| 1 | 1 | 0 | 1 | 0 | 0 | 53 | 7.5 | 75 |
| 1 | 1 | 0 | 1 | 0 | 0 | 54 | 7.5 | 75 |
| 1 | 1 | 0 | 1 | 0 | 0 | 55 | 7.5 | 75 |
| 1 | 1 | 0 | 1 | 0 | 0 | 56 | 7.5 | 75 |
| 1 | 1 | 0 | 1 | 0 | 0 | 57 | 7.5 | 75 |
| 1 | 1 | 0 | 1 | 0 | 0 | 58 | 7.5 | 75 |
| 1 | 1 | 0 | 1 | 0 | 0 | 59 | 7.5 | 75 |
| 1 | 1 | 0 | 1 | 0 | 0 | 60 | 7.5 | 75 |
| 1 | 1 | 0 | 1 | 0 | 0 | 61 | 7.5 | 75 |
| 1 | 1 | 0 | 1 | 0 | 0 | 62 | 7.5 | 75 |
| 1 | 1 | 0 | 1 | 0 | 0 | 63 | 7.5 | 75 |
| 1 | 1 | 0 | 1 | 0 | 0 | 64 | 7.5 | 75 |
| 1 | 1 | 0 | 1 | 0 | 0 | 65 | 7.5 | 75 |
| 1 | 1 | 0 | 1 | 0 | 0 | 66 | 7.5 | 75 |
| 1 | 1 | 0 | 1 | 0 | 0 | 67 | 7.5 | 75 |
| 1 | 1 | 0 | 1 | 0 | 0 | 68 | 7.5 | 75 |
| 1 | 1 | 0 | 1 | 0 | 0 | 69 | 7.5 | 75 |
| 1 | 1 | 0 | 1 | 0 | 0 | 70 | 7.5 | 75 |
| 1 | 1 | 0 | 1 | 0 | 0 | 71 | 7.5 | 75 |
| 1 | 1 | 0 | 1 | 0 | 0 | 72 | 7.5 | 75 |
| 1 | 1 | 0 | 1 | 0 | 0 | 73 | 7.5 | 75 |
| 1 | 1 | 0 | 1 | 0 | 0 | 74 | 7.5 | 75 |
| 1 | 1 | 0 | 1 | 0 | 0 | 75 | 7.5 | 75 |

|   |   |   |   |   |   |     |     |     |
|---|---|---|---|---|---|-----|-----|-----|
| 1 | 1 | 0 | 1 | 0 | 0 | 76  | 7.5 | 75  |
| 1 | 1 | 0 | 1 | 0 | 0 | 77  | 7.5 | 75  |
| 1 | 1 | 0 | 1 | 0 | 0 | 78  | 7.5 | 75  |
| 1 | 1 | 0 | 1 | 0 | 0 | 79  | 7.5 | 75  |
| 1 | 1 | 0 | 1 | 0 | 0 | 80  | 7.5 | 75  |
| 1 | 1 | 0 | 1 | 0 | 0 | 81  | 7.5 | 75  |
| 1 | 1 | 0 | 1 | 0 | 0 | 82  | 7.5 | 75  |
| 1 | 1 | 0 | 1 | 0 | 0 | 83  | 7.5 | 75  |
| 1 | 1 | 0 | 1 | 0 | 0 | 84  | 7.5 | 75  |
| 1 | 1 | 0 | 1 | 0 | 0 | 85  | 7.5 | 75  |
| 1 | 1 | 0 | 1 | 0 | 0 | 86  | 7.5 | 75  |
| 1 | 1 | 0 | 1 | 0 | 0 | 87  | 7.5 | 75  |
| 1 | 1 | 0 | 1 | 0 | 0 | 88  | 7.5 | 75  |
| 1 | 1 | 0 | 1 | 0 | 0 | 89  | 7.5 | 75  |
| 1 | 1 | 0 | 1 | 0 | 0 | 90  | 7.5 | 75  |
| 1 | 1 | 0 | 1 | 0 | 0 | 91  | 7.5 | 75  |
| 1 | 1 | 0 | 1 | 0 | 0 | 92  | 7.5 | 75  |
| 1 | 1 | 0 | 1 | 0 | 0 | 93  | 7.5 | 75  |
| 1 | 1 | 0 | 1 | 0 | 0 | 94  | 7.5 | 75  |
| 1 | 1 | 0 | 1 | 0 | 0 | 95  | 7.5 | 75  |
| 1 | 1 | 0 | 1 | 0 | 0 | 96  | 7.5 | 75  |
| 1 | 1 | 0 | 1 | 0 | 0 | 97  | 7.5 | 75  |
| 1 | 1 | 0 | 1 | 0 | 0 | 98  | 7.5 | 75  |
| 1 | 1 | 0 | 1 | 0 | 0 | 99  | 7.5 | 75  |
| 1 | 1 | 0 | 1 | 0 | 0 | 100 | 7.5 | 75  |
| 1 | 1 | 0 | 1 | 0 | 0 | 101 | 7.5 | 75  |
| 1 | 1 | 0 | 1 | 0 | 0 | 102 | 7.5 | 75  |
| 1 | 1 | 0 | 1 | 0 | 0 | 103 | 7.5 | 75  |
| 1 | 1 | 0 | 1 | 0 | 0 | 104 | 7.5 | 75  |
| 1 | 1 | 0 | 1 | 0 | 0 | 105 | 7.5 | 75  |
| 1 | 1 | 0 | 1 | 0 | 0 | 106 | 7.5 | 135 |
| 1 | 1 | 0 | 1 | 0 | 0 | 107 | 7.5 | 135 |
| 1 | 1 | 0 | 1 | 0 | 0 | 108 | 7.5 | 135 |
| 1 | 1 | 0 | 1 | 0 | 0 | 109 | 7.5 | 135 |
| 1 | 1 | 0 | 1 | 0 | 0 | 110 | 7.5 | 135 |
| 1 | 1 | 0 | 1 | 0 | 0 | 111 | 7.5 | 135 |
| 1 | 1 | 0 | 1 | 0 | 0 | 112 | 7.5 | 135 |
| 1 | 1 | 0 | 1 | 0 | 0 | 113 | 7.5 | 135 |
| 1 | 1 | 0 | 1 | 0 | 0 | 114 | 7.5 | 135 |
| 1 | 1 | 0 | 1 | 0 | 0 | 115 | 7.5 | 135 |
| 1 | 1 | 0 | 1 | 0 | 0 | 116 | 7.5 | 135 |
| 1 | 1 | 0 | 1 | 0 | 0 | 117 | 7.5 | 135 |
| 1 | 1 | 0 | 1 | 0 | 0 | 118 | 7.5 | 135 |
| 1 | 1 | 0 | 1 | 0 | 0 | 119 | 7.5 | 135 |
| 1 | 1 | 0 | 1 | 0 | 0 | 120 | 7.5 | 135 |
| 1 | 1 | 0 | 1 | 0 | 0 | 121 | 7.5 | 135 |

|   |   |   |   |   |   |     |     |     |
|---|---|---|---|---|---|-----|-----|-----|
| 1 | 1 | 0 | 1 | 0 | 0 | 122 | 7.5 | 135 |
| 1 | 1 | 0 | 1 | 0 | 0 | 123 | 7.5 | 135 |
| 1 | 1 | 0 | 1 | 0 | 0 | 124 | 7.5 | 135 |
| 1 | 1 | 0 | 1 | 0 | 0 | 125 | 7.5 | 135 |
| 1 | 1 | 0 | 1 | 0 | 0 | 126 | 7.5 | 135 |
| 1 | 1 | 0 | 1 | 0 | 0 | 127 | 7.5 | 135 |
| 1 | 1 | 0 | 1 | 0 | 0 | 128 | 7.5 | 135 |
| 1 | 1 | 0 | 1 | 0 | 0 | 129 | 7.5 | 135 |
| 1 | 1 | 0 | 1 | 0 | 0 | 130 | 7.5 | 135 |
| 1 | 1 | 0 | 1 | 0 | 0 | 131 | 7.5 | 135 |
| 1 | 1 | 0 | 1 | 0 | 0 | 132 | 7.5 | 135 |
| 1 | 1 | 0 | 1 | 0 | 0 | 133 | 7.5 | 135 |
| 1 | 1 | 0 | 1 | 0 | 0 | 134 | 7.5 | 135 |
| 1 | 1 | 0 | 1 | 0 | 0 | 135 | 7.5 | 135 |
| 1 | 1 | 0 | 1 | 0 | 0 | 136 | 7.5 | 135 |
| 1 | 1 | 0 | 1 | 0 | 0 | 137 | 7.5 | 135 |
| 1 | 1 | 0 | 1 | 0 | 0 | 138 | 7.5 | 135 |
| 1 | 1 | 0 | 1 | 0 | 0 | 139 | 7.5 | 135 |
| 1 | 1 | 0 | 1 | 0 | 0 | 140 | 7.5 | 135 |
| 1 | 1 | 0 | 1 | 0 | 0 | 141 | 7.5 | 135 |
| 1 | 1 | 0 | 1 | 0 | 0 | 142 | 7.5 | 135 |
| 1 | 1 | 0 | 1 | 0 | 0 | 143 | 7.5 | 135 |
| 1 | 1 | 0 | 1 | 0 | 0 | 144 | 7.5 | 135 |
| 1 | 1 | 0 | 1 | 0 | 0 | 145 | 7.5 | 135 |
| 1 | 1 | 0 | 1 | 0 | 0 | 146 | 7.5 | 135 |
| 1 | 1 | 0 | 1 | 0 | 0 | 147 | 7.5 | 135 |
| 1 | 1 | 0 | 1 | 0 | 0 | 148 | 7.5 | 135 |
| 1 | 1 | 0 | 1 | 0 | 0 | 149 | 7.5 | 135 |
| 1 | 1 | 0 | 1 | 0 | 0 | 150 | 7.5 | 150 |
| 1 | 1 | 0 | 1 | 0 | 0 | 151 | 7.5 | 165 |
| 1 | 1 | 0 | 1 | 0 | 0 | 152 | 7.5 | 165 |
| 1 | 1 | 0 | 1 | 0 | 0 | 153 | 7.5 | 165 |
| 1 | 1 | 0 | 1 | 0 | 0 | 154 | 7.5 | 165 |
| 1 | 1 | 0 | 1 | 0 | 0 | 155 | 7.5 | 165 |
| 1 | 1 | 0 | 1 | 0 | 0 | 156 | 7.5 | 165 |
| 1 | 1 | 0 | 1 | 0 | 0 | 157 | 7.5 | 165 |
| 1 | 1 | 0 | 1 | 0 | 0 | 158 | 7.5 | 165 |
| 1 | 1 | 0 | 1 | 0 | 0 | 159 | 7.5 | 165 |
| 1 | 1 | 0 | 1 | 0 | 0 | 160 | 7.5 | 165 |
| 1 | 1 | 0 | 1 | 0 | 0 | 161 | 7.5 | 165 |
| 1 | 1 | 0 | 1 | 0 | 0 | 162 | 7.5 | 165 |
| 1 | 1 | 0 | 1 | 0 | 0 | 163 | 7.5 | 165 |
| 1 | 1 | 0 | 1 | 0 | 0 | 164 | 7.5 | 165 |
| 1 | 1 | 0 | 1 | 0 | 0 | 165 | 7.5 | 165 |
| 1 | 1 | 0 | 1 | 0 | 0 | 166 | 7.5 | 165 |
| 1 | 1 | 0 | 1 | 0 | 0 | 167 | 7.5 | 165 |

|   |   |   |   |   |   |     |     |     |
|---|---|---|---|---|---|-----|-----|-----|
| 1 | 1 | 0 | 1 | 0 | 0 | 168 | 7.5 | 165 |
| 1 | 1 | 0 | 1 | 0 | 0 | 169 | 7.5 | 165 |
| 1 | 1 | 0 | 1 | 0 | 0 | 170 | 7.5 | 165 |
| 1 | 1 | 0 | 1 | 0 | 0 | 171 | 7.5 | 165 |
| 1 | 1 | 0 | 1 | 0 | 0 | 172 | 7.5 | 165 |
| 1 | 1 | 0 | 1 | 0 | 0 | 173 | 7.5 | 165 |
| 1 | 1 | 0 | 1 | 0 | 0 | 174 | 7.5 | 165 |
| 1 | 1 | 0 | 1 | 0 | 0 | 175 | 7.5 | 165 |
| 1 | 1 | 0 | 1 | 0 | 0 | 176 | 7.5 | 165 |
| 1 | 1 | 0 | 1 | 0 | 0 | 177 | 7.5 | 165 |
| 1 | 1 | 0 | 1 | 0 | 0 | 178 | 7.5 | 165 |
| 1 | 1 | 0 | 1 | 0 | 0 | 179 | 7.5 | 165 |
| 1 | 1 | 0 | 1 | 0 | 0 | 180 | 7.5 | 180 |
| 1 | 1 | 0 | 0 | 1 | 0 | 0   | 7.5 | 75  |
| 1 | 1 | 0 | 0 | 1 | 0 | 1   | 7.5 | 75  |
| 1 | 1 | 0 | 0 | 1 | 0 | 2   | 7.5 | 75  |
| 1 | 1 | 0 | 0 | 1 | 0 | 3   | 7.5 | 75  |
| 1 | 1 | 0 | 0 | 1 | 0 | 4   | 7.5 | 75  |
| 1 | 1 | 0 | 0 | 1 | 0 | 5   | 7.5 | 75  |
| 1 | 1 | 0 | 0 | 1 | 0 | 6   | 7.5 | 75  |
| 1 | 1 | 0 | 0 | 1 | 0 | 7   | 7.5 | 75  |
| 1 | 1 | 0 | 0 | 1 | 0 | 8   | 7.5 | 75  |
| 1 | 1 | 0 | 0 | 1 | 0 | 9   | 7.5 | 75  |
| 1 | 1 | 0 | 0 | 1 | 0 | 10  | 7.5 | 75  |
| 1 | 1 | 0 | 0 | 1 | 0 | 11  | 7.5 | 75  |
| 1 | 1 | 0 | 0 | 1 | 0 | 12  | 7.5 | 75  |
| 1 | 1 | 0 | 0 | 1 | 0 | 13  | 7.5 | 75  |
| 1 | 1 | 0 | 0 | 1 | 0 | 14  | 7.5 | 75  |
| 1 | 1 | 0 | 0 | 1 | 0 | 15  | 7.5 | 75  |
| 1 | 1 | 0 | 0 | 1 | 0 | 16  | 7.5 | 75  |
| 1 | 1 | 0 | 0 | 1 | 0 | 17  | 7.5 | 75  |
| 1 | 1 | 0 | 0 | 1 | 0 | 18  | 7.5 | 75  |
| 1 | 1 | 0 | 0 | 1 | 0 | 19  | 7.5 | 75  |
| 1 | 1 | 0 | 0 | 1 | 0 | 20  | 7.5 | 75  |
| 1 | 1 | 0 | 0 | 1 | 0 | 21  | 7.5 | 75  |
| 1 | 1 | 0 | 0 | 1 | 0 | 22  | 7.5 | 75  |
| 1 | 1 | 0 | 0 | 1 | 0 | 23  | 7.5 | 75  |
| 1 | 1 | 0 | 0 | 1 | 0 | 24  | 7.5 | 75  |
| 1 | 1 | 0 | 0 | 1 | 0 | 25  | 7.5 | 75  |
| 1 | 1 | 0 | 0 | 1 | 0 | 26  | 7.5 | 75  |
| 1 | 1 | 0 | 0 | 1 | 0 | 27  | 7.5 | 75  |
| 1 | 1 | 0 | 0 | 1 | 0 | 28  | 7.5 | 75  |
| 1 | 1 | 0 | 0 | 1 | 0 | 29  | 7.5 | 75  |
| 1 | 1 | 0 | 0 | 1 | 0 | 30  | 7.5 | 75  |
| 1 | 1 | 0 | 0 | 1 | 0 | 31  | 7.5 | 75  |
| 1 | 1 | 0 | 0 | 1 | 0 | 32  | 7.5 | 75  |

|   |   |   |   |   |   |    |     |    |
|---|---|---|---|---|---|----|-----|----|
| 1 | 1 | 0 | 0 | 1 | 0 | 33 | 7.5 | 75 |
| 1 | 1 | 0 | 0 | 1 | 0 | 34 | 7.5 | 75 |
| 1 | 1 | 0 | 0 | 1 | 0 | 35 | 7.5 | 75 |
| 1 | 1 | 0 | 0 | 1 | 0 | 36 | 7.5 | 75 |
| 1 | 1 | 0 | 0 | 1 | 0 | 37 | 7.5 | 75 |
| 1 | 1 | 0 | 0 | 1 | 0 | 38 | 7.5 | 75 |
| 1 | 1 | 0 | 0 | 1 | 0 | 39 | 7.5 | 75 |
| 1 | 1 | 0 | 0 | 1 | 0 | 40 | 7.5 | 75 |
| 1 | 1 | 0 | 0 | 1 | 0 | 41 | 7.5 | 75 |
| 1 | 1 | 0 | 0 | 1 | 0 | 42 | 7.5 | 75 |
| 1 | 1 | 0 | 0 | 1 | 0 | 43 | 7.5 | 75 |
| 1 | 1 | 0 | 0 | 1 | 0 | 44 | 7.5 | 75 |
| 1 | 1 | 0 | 0 | 1 | 0 | 45 | 7.5 | 75 |
| 1 | 1 | 0 | 0 | 1 | 0 | 46 | 7.5 | 75 |
| 1 | 1 | 0 | 0 | 1 | 0 | 47 | 7.5 | 75 |
| 1 | 1 | 0 | 0 | 1 | 0 | 48 | 7.5 | 75 |
| 1 | 1 | 0 | 0 | 1 | 0 | 49 | 7.5 | 75 |
| 1 | 1 | 0 | 0 | 1 | 0 | 50 | 7.5 | 75 |
| 1 | 1 | 0 | 0 | 1 | 0 | 51 | 7.5 | 75 |
| 1 | 1 | 0 | 0 | 1 | 0 | 52 | 7.5 | 75 |
| 1 | 1 | 0 | 0 | 1 | 0 | 53 | 7.5 | 75 |
| 1 | 1 | 0 | 0 | 1 | 0 | 54 | 7.5 | 75 |
| 1 | 1 | 0 | 0 | 1 | 0 | 55 | 7.5 | 75 |
| 1 | 1 | 0 | 0 | 1 | 0 | 56 | 7.5 | 75 |
| 1 | 1 | 0 | 0 | 1 | 0 | 57 | 7.5 | 75 |
| 1 | 1 | 0 | 0 | 1 | 0 | 58 | 7.5 | 75 |
| 1 | 1 | 0 | 0 | 1 | 0 | 59 | 7.5 | 75 |
| 1 | 1 | 0 | 0 | 1 | 0 | 60 | 7.5 | 75 |
| 1 | 1 | 0 | 0 | 1 | 0 | 61 | 7.5 | 75 |
| 1 | 1 | 0 | 0 | 1 | 0 | 62 | 7.5 | 75 |
| 1 | 1 | 0 | 0 | 1 | 0 | 63 | 7.5 | 75 |
| 1 | 1 | 0 | 0 | 1 | 0 | 64 | 7.5 | 75 |
| 1 | 1 | 0 | 0 | 1 | 0 | 65 | 7.5 | 75 |
| 1 | 1 | 0 | 0 | 1 | 0 | 66 | 7.5 | 75 |
| 1 | 1 | 0 | 0 | 1 | 0 | 67 | 7.5 | 75 |
| 1 | 1 | 0 | 0 | 1 | 0 | 68 | 7.5 | 75 |
| 1 | 1 | 0 | 0 | 1 | 0 | 69 | 7.5 | 75 |
| 1 | 1 | 0 | 0 | 1 | 0 | 70 | 7.5 | 75 |
| 1 | 1 | 0 | 0 | 1 | 0 | 71 | 7.5 | 75 |
| 1 | 1 | 0 | 0 | 1 | 0 | 72 | 7.5 | 75 |
| 1 | 1 | 0 | 0 | 1 | 0 | 73 | 7.5 | 75 |
| 1 | 1 | 0 | 0 | 1 | 0 | 74 | 7.5 | 75 |
| 1 | 1 | 0 | 0 | 1 | 0 | 75 | 7.5 | 75 |
| 1 | 1 | 0 | 0 | 1 | 0 | 76 | 7.5 | 75 |
| 1 | 1 | 0 | 0 | 1 | 0 | 77 | 7.5 | 75 |
| 1 | 1 | 0 | 0 | 1 | 0 | 78 | 7.5 | 75 |

|   |   |   |   |   |   |     |     |     |
|---|---|---|---|---|---|-----|-----|-----|
| 1 | 1 | 0 | 0 | 1 | 0 | 79  | 7.5 | 75  |
| 1 | 1 | 0 | 0 | 1 | 0 | 80  | 7.5 | 75  |
| 1 | 1 | 0 | 0 | 1 | 0 | 81  | 7.5 | 75  |
| 1 | 1 | 0 | 0 | 1 | 0 | 82  | 7.5 | 75  |
| 1 | 1 | 0 | 0 | 1 | 0 | 83  | 7.5 | 75  |
| 1 | 1 | 0 | 0 | 1 | 0 | 84  | 7.5 | 75  |
| 1 | 1 | 0 | 0 | 1 | 0 | 85  | 7.5 | 75  |
| 1 | 1 | 0 | 0 | 1 | 0 | 86  | 7.5 | 75  |
| 1 | 1 | 0 | 0 | 1 | 0 | 87  | 7.5 | 75  |
| 1 | 1 | 0 | 0 | 1 | 0 | 88  | 7.5 | 75  |
| 1 | 1 | 0 | 0 | 1 | 0 | 89  | 7.5 | 75  |
| 1 | 1 | 0 | 0 | 1 | 0 | 90  | 7.5 | 90  |
| 1 | 1 | 0 | 0 | 1 | 0 | 91  | 7.5 | 105 |
| 1 | 1 | 0 | 0 | 1 | 0 | 92  | 7.5 | 105 |
| 1 | 1 | 0 | 0 | 1 | 0 | 93  | 7.5 | 105 |
| 1 | 1 | 0 | 0 | 1 | 0 | 94  | 7.5 | 105 |
| 1 | 1 | 0 | 0 | 1 | 0 | 95  | 7.5 | 105 |
| 1 | 1 | 0 | 0 | 1 | 0 | 96  | 7.5 | 105 |
| 1 | 1 | 0 | 0 | 1 | 0 | 97  | 7.5 | 105 |
| 1 | 1 | 0 | 0 | 1 | 0 | 98  | 7.5 | 105 |
| 1 | 1 | 0 | 0 | 1 | 0 | 99  | 7.5 | 105 |
| 1 | 1 | 0 | 0 | 1 | 0 | 100 | 7.5 | 105 |
| 1 | 1 | 0 | 0 | 1 | 0 | 101 | 7.5 | 105 |
| 1 | 1 | 0 | 0 | 1 | 0 | 102 | 7.5 | 105 |
| 1 | 1 | 0 | 0 | 1 | 0 | 103 | 7.5 | 105 |
| 1 | 1 | 0 | 0 | 1 | 0 | 104 | 7.5 | 105 |
| 1 | 1 | 0 | 0 | 1 | 0 | 105 | 7.5 | 105 |
| 1 | 1 | 0 | 0 | 1 | 0 | 106 | 7.5 | 105 |
| 1 | 1 | 0 | 0 | 1 | 0 | 107 | 7.5 | 105 |
| 1 | 1 | 0 | 0 | 1 | 0 | 108 | 7.5 | 105 |
| 1 | 1 | 0 | 0 | 1 | 0 | 109 | 7.5 | 105 |
| 1 | 1 | 0 | 0 | 1 | 0 | 110 | 7.5 | 105 |
| 1 | 1 | 0 | 0 | 1 | 0 | 111 | 7.5 | 105 |
| 1 | 1 | 0 | 0 | 1 | 0 | 112 | 7.5 | 105 |
| 1 | 1 | 0 | 0 | 1 | 0 | 113 | 7.5 | 105 |
| 1 | 1 | 0 | 0 | 1 | 0 | 114 | 7.5 | 105 |
| 1 | 1 | 0 | 0 | 1 | 0 | 115 | 7.5 | 105 |
| 1 | 1 | 0 | 0 | 1 | 0 | 116 | 7.5 | 105 |
| 1 | 1 | 0 | 0 | 1 | 0 | 117 | 7.5 | 105 |
| 1 | 1 | 0 | 0 | 1 | 0 | 118 | 7.5 | 105 |
| 1 | 1 | 0 | 0 | 1 | 0 | 119 | 7.5 | 105 |
| 1 | 1 | 0 | 0 | 1 | 0 | 120 | 7.5 | 105 |
| 1 | 1 | 0 | 0 | 1 | 0 | 121 | 7.5 | 105 |
| 1 | 1 | 0 | 0 | 1 | 0 | 122 | 7.5 | 105 |
| 1 | 1 | 0 | 0 | 1 | 0 | 123 | 7.5 | 105 |
| 1 | 1 | 0 | 0 | 1 | 0 | 124 | 7.5 | 105 |

|   |   |   |   |   |   |     |     |     |
|---|---|---|---|---|---|-----|-----|-----|
| 1 | 1 | 0 | 0 | 1 | 0 | 125 | 7.5 | 105 |
| 1 | 1 | 0 | 0 | 1 | 0 | 126 | 7.5 | 105 |
| 1 | 1 | 0 | 0 | 1 | 0 | 127 | 7.5 | 105 |
| 1 | 1 | 0 | 0 | 1 | 0 | 128 | 7.5 | 105 |
| 1 | 1 | 0 | 0 | 1 | 0 | 129 | 7.5 | 105 |
| 1 | 1 | 0 | 0 | 1 | 0 | 130 | 7.5 | 105 |
| 1 | 1 | 0 | 0 | 1 | 0 | 131 | 7.5 | 105 |
| 1 | 1 | 0 | 0 | 1 | 0 | 132 | 7.5 | 105 |
| 1 | 1 | 0 | 0 | 1 | 0 | 133 | 7.5 | 105 |
| 1 | 1 | 0 | 0 | 1 | 0 | 134 | 7.5 | 105 |
| 1 | 1 | 0 | 0 | 1 | 0 | 135 | 7.5 | 105 |
| 1 | 1 | 0 | 0 | 1 | 0 | 136 | 7.5 | 165 |
| 1 | 1 | 0 | 0 | 1 | 0 | 137 | 7.5 | 165 |
| 1 | 1 | 0 | 0 | 1 | 0 | 138 | 7.5 | 165 |
| 1 | 1 | 0 | 0 | 1 | 0 | 139 | 7.5 | 165 |
| 1 | 1 | 0 | 0 | 1 | 0 | 140 | 7.5 | 165 |
| 1 | 1 | 0 | 0 | 1 | 0 | 141 | 7.5 | 165 |
| 1 | 1 | 0 | 0 | 1 | 0 | 142 | 7.5 | 165 |
| 1 | 1 | 0 | 0 | 1 | 0 | 143 | 7.5 | 165 |
| 1 | 1 | 0 | 0 | 1 | 0 | 144 | 7.5 | 165 |
| 1 | 1 | 0 | 0 | 1 | 0 | 145 | 7.5 | 165 |
| 1 | 1 | 0 | 0 | 1 | 0 | 146 | 7.5 | 165 |
| 1 | 1 | 0 | 0 | 1 | 0 | 147 | 7.5 | 165 |
| 1 | 1 | 0 | 0 | 1 | 0 | 148 | 7.5 | 165 |
| 1 | 1 | 0 | 0 | 1 | 0 | 149 | 7.5 | 165 |
| 1 | 1 | 0 | 0 | 1 | 0 | 150 | 7.5 | 165 |
| 1 | 1 | 0 | 0 | 1 | 0 | 151 | 7.5 | 165 |
| 1 | 1 | 0 | 0 | 1 | 0 | 152 | 7.5 | 165 |
| 1 | 1 | 0 | 0 | 1 | 0 | 153 | 7.5 | 165 |
| 1 | 1 | 0 | 0 | 1 | 0 | 154 | 7.5 | 165 |
| 1 | 1 | 0 | 0 | 1 | 0 | 155 | 7.5 | 165 |
| 1 | 1 | 0 | 0 | 1 | 0 | 156 | 7.5 | 165 |
| 1 | 1 | 0 | 0 | 1 | 0 | 157 | 7.5 | 165 |
| 1 | 1 | 0 | 0 | 1 | 0 | 158 | 7.5 | 165 |
| 1 | 1 | 0 | 0 | 1 | 0 | 159 | 7.5 | 165 |
| 1 | 1 | 0 | 0 | 1 | 0 | 160 | 7.5 | 165 |
| 1 | 1 | 0 | 0 | 1 | 0 | 161 | 7.5 | 165 |
| 1 | 1 | 0 | 0 | 1 | 0 | 162 | 7.5 | 165 |
| 1 | 1 | 0 | 0 | 1 | 0 | 163 | 7.5 | 165 |
| 1 | 1 | 0 | 0 | 1 | 0 | 164 | 7.5 | 165 |
| 1 | 1 | 0 | 0 | 1 | 0 | 165 | 7.5 | 165 |
| 1 | 1 | 0 | 0 | 1 | 0 | 166 | 7.5 | 165 |
| 1 | 1 | 0 | 0 | 1 | 0 | 167 | 7.5 | 165 |
| 1 | 1 | 0 | 0 | 1 | 0 | 168 | 7.5 | 165 |
| 1 | 1 | 0 | 0 | 1 | 0 | 169 | 7.5 | 165 |
| 1 | 1 | 0 | 0 | 1 | 0 | 170 | 7.5 | 165 |

|   |   |   |   |   |   |     |     |     |
|---|---|---|---|---|---|-----|-----|-----|
| 1 | 1 | 0 | 0 | 1 | 0 | 171 | 7.5 | 165 |
| 1 | 1 | 0 | 0 | 1 | 0 | 172 | 7.5 | 165 |
| 1 | 1 | 0 | 0 | 1 | 0 | 173 | 7.5 | 165 |
| 1 | 1 | 0 | 0 | 1 | 0 | 174 | 7.5 | 165 |
| 1 | 1 | 0 | 0 | 1 | 0 | 175 | 7.5 | 165 |
| 1 | 1 | 0 | 0 | 1 | 0 | 176 | 7.5 | 165 |
| 1 | 1 | 0 | 0 | 1 | 0 | 177 | 7.5 | 165 |
| 1 | 1 | 0 | 0 | 1 | 0 | 178 | 7.5 | 165 |
| 1 | 1 | 0 | 0 | 1 | 0 | 179 | 7.5 | 165 |
| 1 | 1 | 0 | 0 | 1 | 0 | 180 | 7.5 | 180 |
| 1 | 1 | 0 | 0 | 0 | 1 | 0   | 7.5 | 75  |
| 1 | 1 | 0 | 0 | 0 | 1 | 1   | 7.5 | 75  |
| 1 | 1 | 0 | 0 | 0 | 1 | 2   | 7.5 | 75  |
| 1 | 1 | 0 | 0 | 0 | 1 | 3   | 7.5 | 75  |
| 1 | 1 | 0 | 0 | 0 | 1 | 4   | 7.5 | 75  |
| 1 | 1 | 0 | 0 | 0 | 1 | 5   | 7.5 | 75  |
| 1 | 1 | 0 | 0 | 0 | 1 | 6   | 7.5 | 75  |
| 1 | 1 | 0 | 0 | 0 | 1 | 7   | 7.5 | 75  |
| 1 | 1 | 0 | 0 | 0 | 1 | 8   | 7.5 | 75  |
| 1 | 1 | 0 | 0 | 0 | 1 | 9   | 7.5 | 75  |
| 1 | 1 | 0 | 0 | 0 | 1 | 10  | 7.5 | 75  |
| 1 | 1 | 0 | 0 | 0 | 1 | 11  | 7.5 | 75  |
| 1 | 1 | 0 | 0 | 0 | 1 | 12  | 7.5 | 75  |
| 1 | 1 | 0 | 0 | 0 | 1 | 13  | 7.5 | 75  |
| 1 | 1 | 0 | 0 | 0 | 1 | 14  | 7.5 | 75  |
| 1 | 1 | 0 | 0 | 0 | 1 | 15  | 7.5 | 75  |
| 1 | 1 | 0 | 0 | 0 | 1 | 16  | 7.5 | 75  |
| 1 | 1 | 0 | 0 | 0 | 1 | 17  | 7.5 | 75  |
| 1 | 1 | 0 | 0 | 0 | 1 | 18  | 7.5 | 75  |
| 1 | 1 | 0 | 0 | 0 | 1 | 19  | 7.5 | 75  |
| 1 | 1 | 0 | 0 | 0 | 1 | 20  | 7.5 | 75  |
| 1 | 1 | 0 | 0 | 0 | 1 | 21  | 7.5 | 75  |
| 1 | 1 | 0 | 0 | 0 | 1 | 22  | 7.5 | 75  |
| 1 | 1 | 0 | 0 | 0 | 1 | 23  | 7.5 | 75  |
| 1 | 1 | 0 | 0 | 0 | 1 | 24  | 7.5 | 75  |
| 1 | 1 | 0 | 0 | 0 | 1 | 25  | 7.5 | 75  |
| 1 | 1 | 0 | 0 | 0 | 1 | 26  | 7.5 | 75  |
| 1 | 1 | 0 | 0 | 0 | 1 | 27  | 7.5 | 75  |
| 1 | 1 | 0 | 0 | 0 | 1 | 28  | 7.5 | 75  |
| 1 | 1 | 0 | 0 | 0 | 1 | 29  | 7.5 | 75  |
| 1 | 1 | 0 | 0 | 0 | 1 | 30  | 7.5 | 75  |
| 1 | 1 | 0 | 0 | 0 | 1 | 31  | 7.5 | 75  |
| 1 | 1 | 0 | 0 | 0 | 1 | 32  | 7.5 | 75  |
| 1 | 1 | 0 | 0 | 0 | 1 | 33  | 7.5 | 75  |
| 1 | 1 | 0 | 0 | 0 | 1 | 34  | 7.5 | 75  |
| 1 | 1 | 0 | 0 | 0 | 1 | 35  | 7.5 | 75  |

|   |   |   |   |   |   |    |     |    |
|---|---|---|---|---|---|----|-----|----|
| 1 | 1 | 0 | 0 | 0 | 1 | 36 | 7.5 | 75 |
| 1 | 1 | 0 | 0 | 0 | 1 | 37 | 7.5 | 75 |
| 1 | 1 | 0 | 0 | 0 | 1 | 38 | 7.5 | 75 |
| 1 | 1 | 0 | 0 | 0 | 1 | 39 | 7.5 | 75 |
| 1 | 1 | 0 | 0 | 0 | 1 | 40 | 7.5 | 75 |
| 1 | 1 | 0 | 0 | 0 | 1 | 41 | 7.5 | 75 |
| 1 | 1 | 0 | 0 | 0 | 1 | 42 | 7.5 | 75 |
| 1 | 1 | 0 | 0 | 0 | 1 | 43 | 7.5 | 75 |
| 1 | 1 | 0 | 0 | 0 | 1 | 44 | 7.5 | 75 |
| 1 | 1 | 0 | 0 | 0 | 1 | 45 | 7.5 | 75 |
| 1 | 1 | 0 | 0 | 0 | 1 | 46 | 7.5 | 75 |
| 1 | 1 | 0 | 0 | 0 | 1 | 47 | 7.5 | 75 |
| 1 | 1 | 0 | 0 | 0 | 1 | 48 | 7.5 | 75 |
| 1 | 1 | 0 | 0 | 0 | 1 | 49 | 7.5 | 75 |
| 1 | 1 | 0 | 0 | 0 | 1 | 50 | 7.5 | 75 |
| 1 | 1 | 0 | 0 | 0 | 1 | 51 | 7.5 | 75 |
| 1 | 1 | 0 | 0 | 0 | 1 | 52 | 7.5 | 75 |
| 1 | 1 | 0 | 0 | 0 | 1 | 53 | 7.5 | 75 |
| 1 | 1 | 0 | 0 | 0 | 1 | 54 | 7.5 | 75 |
| 1 | 1 | 0 | 0 | 0 | 1 | 55 | 7.5 | 75 |
| 1 | 1 | 0 | 0 | 0 | 1 | 56 | 7.5 | 75 |
| 1 | 1 | 0 | 0 | 0 | 1 | 57 | 7.5 | 75 |
| 1 | 1 | 0 | 0 | 0 | 1 | 58 | 7.5 | 75 |
| 1 | 1 | 0 | 0 | 0 | 1 | 59 | 7.5 | 75 |
| 1 | 1 | 0 | 0 | 0 | 1 | 60 | 7.5 | 75 |
| 1 | 1 | 0 | 0 | 0 | 1 | 61 | 7.5 | 75 |
| 1 | 1 | 0 | 0 | 0 | 1 | 62 | 7.5 | 75 |
| 1 | 1 | 0 | 0 | 0 | 1 | 63 | 7.5 | 75 |
| 1 | 1 | 0 | 0 | 0 | 1 | 64 | 7.5 | 75 |
| 1 | 1 | 0 | 0 | 0 | 1 | 65 | 7.5 | 75 |
| 1 | 1 | 0 | 0 | 0 | 1 | 66 | 7.5 | 75 |
| 1 | 1 | 0 | 0 | 0 | 1 | 67 | 7.5 | 75 |
| 1 | 1 | 0 | 0 | 0 | 1 | 68 | 7.5 | 75 |
| 1 | 1 | 0 | 0 | 0 | 1 | 69 | 7.5 | 75 |
| 1 | 1 | 0 | 0 | 0 | 1 | 70 | 7.5 | 75 |
| 1 | 1 | 0 | 0 | 0 | 1 | 71 | 7.5 | 75 |
| 1 | 1 | 0 | 0 | 0 | 1 | 72 | 7.5 | 75 |
| 1 | 1 | 0 | 0 | 0 | 1 | 73 | 7.5 | 75 |
| 1 | 1 | 0 | 0 | 0 | 1 | 74 | 7.5 | 75 |
| 1 | 1 | 0 | 0 | 0 | 1 | 75 | 7.5 | 75 |
| 1 | 1 | 0 | 0 | 0 | 1 | 76 | 7.5 | 75 |
| 1 | 1 | 0 | 0 | 0 | 1 | 77 | 7.5 | 75 |
| 1 | 1 | 0 | 0 | 0 | 1 | 78 | 7.5 | 75 |
| 1 | 1 | 0 | 0 | 0 | 1 | 79 | 7.5 | 75 |
| 1 | 1 | 0 | 0 | 0 | 1 | 80 | 7.5 | 75 |
| 1 | 1 | 0 | 0 | 0 | 1 | 81 | 7.5 | 75 |

|   |   |   |   |   |   |     |     |     |
|---|---|---|---|---|---|-----|-----|-----|
| 1 | 1 | 0 | 0 | 0 | 1 | 82  | 7.5 | 75  |
| 1 | 1 | 0 | 0 | 0 | 1 | 83  | 7.5 | 75  |
| 1 | 1 | 0 | 0 | 0 | 1 | 84  | 7.5 | 75  |
| 1 | 1 | 0 | 0 | 0 | 1 | 85  | 7.5 | 75  |
| 1 | 1 | 0 | 0 | 0 | 1 | 86  | 7.5 | 75  |
| 1 | 1 | 0 | 0 | 0 | 1 | 87  | 7.5 | 75  |
| 1 | 1 | 0 | 0 | 0 | 1 | 88  | 7.5 | 75  |
| 1 | 1 | 0 | 0 | 0 | 1 | 89  | 7.5 | 75  |
| 1 | 1 | 0 | 0 | 0 | 1 | 90  | 7.5 | 90  |
| 1 | 1 | 0 | 0 | 0 | 1 | 91  | 7.5 | 105 |
| 1 | 1 | 0 | 0 | 0 | 1 | 92  | 7.5 | 105 |
| 1 | 1 | 0 | 0 | 0 | 1 | 93  | 7.5 | 105 |
| 1 | 1 | 0 | 0 | 0 | 1 | 94  | 7.5 | 105 |
| 1 | 1 | 0 | 0 | 0 | 1 | 95  | 7.5 | 105 |
| 1 | 1 | 0 | 0 | 0 | 1 | 96  | 7.5 | 105 |
| 1 | 1 | 0 | 0 | 0 | 1 | 97  | 7.5 | 105 |
| 1 | 1 | 0 | 0 | 0 | 1 | 98  | 7.5 | 105 |
| 1 | 1 | 0 | 0 | 0 | 1 | 99  | 7.5 | 105 |
| 1 | 1 | 0 | 0 | 0 | 1 | 100 | 7.5 | 105 |
| 1 | 1 | 0 | 0 | 0 | 1 | 101 | 7.5 | 105 |
| 1 | 1 | 0 | 0 | 0 | 1 | 102 | 7.5 | 105 |
| 1 | 1 | 0 | 0 | 0 | 1 | 103 | 7.5 | 105 |
| 1 | 1 | 0 | 0 | 0 | 1 | 104 | 7.5 | 105 |
| 1 | 1 | 0 | 0 | 0 | 1 | 105 | 7.5 | 105 |
| 1 | 1 | 0 | 0 | 0 | 1 | 106 | 7.5 | 105 |
| 1 | 1 | 0 | 0 | 0 | 1 | 107 | 7.5 | 105 |
| 1 | 1 | 0 | 0 | 0 | 1 | 108 | 7.5 | 105 |
| 1 | 1 | 0 | 0 | 0 | 1 | 109 | 7.5 | 105 |
| 1 | 1 | 0 | 0 | 0 | 1 | 110 | 7.5 | 105 |
| 1 | 1 | 0 | 0 | 0 | 1 | 111 | 7.5 | 105 |
| 1 | 1 | 0 | 0 | 0 | 1 | 112 | 7.5 | 105 |
| 1 | 1 | 0 | 0 | 0 | 1 | 113 | 7.5 | 105 |
| 1 | 1 | 0 | 0 | 0 | 1 | 114 | 7.5 | 105 |
| 1 | 1 | 0 | 0 | 0 | 1 | 115 | 7.5 | 105 |
| 1 | 1 | 0 | 0 | 0 | 1 | 116 | 7.5 | 105 |
| 1 | 1 | 0 | 0 | 0 | 1 | 117 | 7.5 | 105 |
| 1 | 1 | 0 | 0 | 0 | 1 | 118 | 7.5 | 105 |
| 1 | 1 | 0 | 0 | 0 | 1 | 119 | 7.5 | 105 |
| 1 | 1 | 0 | 0 | 0 | 1 | 120 | 7.5 | 120 |
| 1 | 1 | 0 | 0 | 0 | 1 | 121 | 7.5 | 135 |
| 1 | 1 | 0 | 0 | 0 | 1 | 122 | 7.5 | 135 |
| 1 | 1 | 0 | 0 | 0 | 1 | 123 | 7.5 | 135 |
| 1 | 1 | 0 | 0 | 0 | 1 | 124 | 7.5 | 135 |
| 1 | 1 | 0 | 0 | 0 | 1 | 125 | 7.5 | 135 |
| 1 | 1 | 0 | 0 | 0 | 1 | 126 | 7.5 | 135 |
| 1 | 1 | 0 | 0 | 0 | 1 | 127 | 7.5 | 135 |

|   |   |   |   |   |   |     |     |     |
|---|---|---|---|---|---|-----|-----|-----|
| 1 | 1 | 0 | 0 | 0 | 1 | 128 | 7.5 | 135 |
| 1 | 1 | 0 | 0 | 0 | 1 | 129 | 7.5 | 135 |
| 1 | 1 | 0 | 0 | 0 | 1 | 130 | 7.5 | 135 |
| 1 | 1 | 0 | 0 | 0 | 1 | 131 | 7.5 | 135 |
| 1 | 1 | 0 | 0 | 0 | 1 | 132 | 7.5 | 135 |
| 1 | 1 | 0 | 0 | 0 | 1 | 133 | 7.5 | 135 |
| 1 | 1 | 0 | 0 | 0 | 1 | 134 | 7.5 | 135 |
| 1 | 1 | 0 | 0 | 0 | 1 | 135 | 7.5 | 135 |
| 1 | 1 | 0 | 0 | 0 | 1 | 136 | 7.5 | 135 |
| 1 | 1 | 0 | 0 | 0 | 1 | 137 | 7.5 | 135 |
| 1 | 1 | 0 | 0 | 0 | 1 | 138 | 7.5 | 135 |
| 1 | 1 | 0 | 0 | 0 | 1 | 139 | 7.5 | 135 |
| 1 | 1 | 0 | 0 | 0 | 1 | 140 | 7.5 | 135 |
| 1 | 1 | 0 | 0 | 0 | 1 | 141 | 7.5 | 135 |
| 1 | 1 | 0 | 0 | 0 | 1 | 142 | 7.5 | 135 |
| 1 | 1 | 0 | 0 | 0 | 1 | 143 | 7.5 | 135 |
| 1 | 1 | 0 | 0 | 0 | 1 | 144 | 7.5 | 135 |
| 1 | 1 | 0 | 0 | 0 | 1 | 145 | 7.5 | 135 |
| 1 | 1 | 0 | 0 | 0 | 1 | 146 | 7.5 | 135 |
| 1 | 1 | 0 | 0 | 0 | 1 | 147 | 7.5 | 135 |
| 1 | 1 | 0 | 0 | 0 | 1 | 148 | 7.5 | 135 |
| 1 | 1 | 0 | 0 | 0 | 1 | 149 | 7.5 | 135 |
| 1 | 1 | 0 | 0 | 0 | 1 | 150 | 7.5 | 135 |
| 1 | 1 | 0 | 0 | 0 | 1 | 151 | 7.5 | 135 |
| 1 | 1 | 0 | 0 | 0 | 1 | 152 | 7.5 | 135 |
| 1 | 1 | 0 | 0 | 0 | 1 | 153 | 7.5 | 135 |
| 1 | 1 | 0 | 0 | 0 | 1 | 154 | 7.5 | 135 |
| 1 | 1 | 0 | 0 | 0 | 1 | 155 | 7.5 | 135 |
| 1 | 1 | 0 | 0 | 0 | 1 | 156 | 7.5 | 135 |
| 1 | 1 | 0 | 0 | 0 | 1 | 157 | 7.5 | 135 |
| 1 | 1 | 0 | 0 | 0 | 1 | 158 | 7.5 | 135 |
| 1 | 1 | 0 | 0 | 0 | 1 | 159 | 7.5 | 135 |
| 1 | 1 | 0 | 0 | 0 | 1 | 160 | 7.5 | 135 |
| 1 | 1 | 0 | 0 | 0 | 1 | 161 | 7.5 | 135 |
| 1 | 1 | 0 | 0 | 0 | 1 | 162 | 7.5 | 135 |
| 1 | 1 | 0 | 0 | 0 | 1 | 163 | 7.5 | 135 |
| 1 | 1 | 0 | 0 | 0 | 1 | 164 | 7.5 | 135 |
| 1 | 1 | 0 | 0 | 0 | 1 | 165 | 7.5 | 135 |
| 1 | 1 | 0 | 0 | 0 | 1 | 166 | 7.5 | 135 |
| 1 | 1 | 0 | 0 | 0 | 1 | 167 | 7.5 | 135 |
| 1 | 1 | 0 | 0 | 0 | 1 | 168 | 7.5 | 135 |
| 1 | 1 | 0 | 0 | 0 | 1 | 169 | 7.5 | 135 |
| 1 | 1 | 0 | 0 | 0 | 1 | 170 | 7.5 | 135 |
| 1 | 1 | 0 | 0 | 0 | 1 | 171 | 7.5 | 135 |
| 1 | 1 | 0 | 0 | 0 | 1 | 172 | 7.5 | 135 |
| 1 | 1 | 0 | 0 | 0 | 1 | 173 | 7.5 | 135 |

|   |   |   |   |   |   |     |     |     |
|---|---|---|---|---|---|-----|-----|-----|
| 1 | 1 | 0 | 0 | 0 | 1 | 174 | 7.5 | 135 |
| 1 | 1 | 0 | 0 | 0 | 1 | 175 | 7.5 | 135 |
| 1 | 1 | 0 | 0 | 0 | 1 | 176 | 7.5 | 135 |
| 1 | 1 | 0 | 0 | 0 | 1 | 177 | 7.5 | 135 |
| 1 | 1 | 0 | 0 | 0 | 1 | 178 | 7.5 | 135 |
| 1 | 1 | 0 | 0 | 0 | 1 | 179 | 7.5 | 135 |
| 1 | 1 | 0 | 0 | 0 | 1 | 180 | 7.5 | 135 |
| 1 | 0 | 1 | 1 | 0 | 0 | 0   | 7.5 | 45  |
| 1 | 0 | 1 | 1 | 0 | 0 | 1   | 7.5 | 45  |
| 1 | 0 | 1 | 1 | 0 | 0 | 2   | 7.5 | 45  |
| 1 | 0 | 1 | 1 | 0 | 0 | 3   | 7.5 | 45  |
| 1 | 0 | 1 | 1 | 0 | 0 | 4   | 7.5 | 45  |
| 1 | 0 | 1 | 1 | 0 | 0 | 5   | 7.5 | 45  |
| 1 | 0 | 1 | 1 | 0 | 0 | 6   | 7.5 | 45  |
| 1 | 0 | 1 | 1 | 0 | 0 | 7   | 7.5 | 45  |
| 1 | 0 | 1 | 1 | 0 | 0 | 8   | 7.5 | 45  |
| 1 | 0 | 1 | 1 | 0 | 0 | 9   | 7.5 | 45  |
| 1 | 0 | 1 | 1 | 0 | 0 | 10  | 7.5 | 45  |
| 1 | 0 | 1 | 1 | 0 | 0 | 11  | 7.5 | 45  |
| 1 | 0 | 1 | 1 | 0 | 0 | 12  | 7.5 | 45  |
| 1 | 0 | 1 | 1 | 0 | 0 | 13  | 7.5 | 45  |
| 1 | 0 | 1 | 1 | 0 | 0 | 14  | 7.5 | 45  |
| 1 | 0 | 1 | 1 | 0 | 0 | 15  | 7.5 | 45  |
| 1 | 0 | 1 | 1 | 0 | 0 | 16  | 7.5 | 45  |
| 1 | 0 | 1 | 1 | 0 | 0 | 17  | 7.5 | 45  |
| 1 | 0 | 1 | 1 | 0 | 0 | 18  | 7.5 | 45  |
| 1 | 0 | 1 | 1 | 0 | 0 | 19  | 7.5 | 45  |
| 1 | 0 | 1 | 1 | 0 | 0 | 20  | 7.5 | 45  |
| 1 | 0 | 1 | 1 | 0 | 0 | 21  | 7.5 | 45  |
| 1 | 0 | 1 | 1 | 0 | 0 | 22  | 7.5 | 45  |
| 1 | 0 | 1 | 1 | 0 | 0 | 23  | 7.5 | 45  |
| 1 | 0 | 1 | 1 | 0 | 0 | 24  | 7.5 | 45  |
| 1 | 0 | 1 | 1 | 0 | 0 | 25  | 7.5 | 45  |
| 1 | 0 | 1 | 1 | 0 | 0 | 26  | 7.5 | 45  |
| 1 | 0 | 1 | 1 | 0 | 0 | 27  | 7.5 | 45  |
| 1 | 0 | 1 | 1 | 0 | 0 | 28  | 7.5 | 45  |
| 1 | 0 | 1 | 1 | 0 | 0 | 29  | 7.5 | 45  |
| 1 | 0 | 1 | 1 | 0 | 0 | 30  | 7.5 | 45  |
| 1 | 0 | 1 | 1 | 0 | 0 | 31  | 7.5 | 45  |
| 1 | 0 | 1 | 1 | 0 | 0 | 32  | 7.5 | 45  |
| 1 | 0 | 1 | 1 | 0 | 0 | 33  | 7.5 | 45  |
| 1 | 0 | 1 | 1 | 0 | 0 | 34  | 7.5 | 45  |
| 1 | 0 | 1 | 1 | 0 | 0 | 35  | 7.5 | 45  |
| 1 | 0 | 1 | 1 | 0 | 0 | 36  | 7.5 | 45  |
| 1 | 0 | 1 | 1 | 0 | 0 | 37  | 7.5 | 45  |
| 1 | 0 | 1 | 1 | 0 | 0 | 38  | 7.5 | 45  |

|   |   |   |   |   |   |    |     |    |
|---|---|---|---|---|---|----|-----|----|
| 1 | 0 | 1 | 1 | 0 | 0 | 39 | 7.5 | 45 |
| 1 | 0 | 1 | 1 | 0 | 0 | 40 | 7.5 | 45 |
| 1 | 0 | 1 | 1 | 0 | 0 | 41 | 7.5 | 45 |
| 1 | 0 | 1 | 1 | 0 | 0 | 42 | 7.5 | 45 |
| 1 | 0 | 1 | 1 | 0 | 0 | 43 | 7.5 | 45 |
| 1 | 0 | 1 | 1 | 0 | 0 | 44 | 7.5 | 45 |
| 1 | 0 | 1 | 1 | 0 | 0 | 45 | 7.5 | 45 |
| 1 | 0 | 1 | 1 | 0 | 0 | 46 | 7.5 | 45 |
| 1 | 0 | 1 | 1 | 0 | 0 | 47 | 7.5 | 45 |
| 1 | 0 | 1 | 1 | 0 | 0 | 48 | 7.5 | 45 |
| 1 | 0 | 1 | 1 | 0 | 0 | 49 | 7.5 | 45 |
| 1 | 0 | 1 | 1 | 0 | 0 | 50 | 7.5 | 45 |
| 1 | 0 | 1 | 1 | 0 | 0 | 51 | 7.5 | 45 |
| 1 | 0 | 1 | 1 | 0 | 0 | 52 | 7.5 | 45 |
| 1 | 0 | 1 | 1 | 0 | 0 | 53 | 7.5 | 45 |
| 1 | 0 | 1 | 1 | 0 | 0 | 54 | 7.5 | 45 |
| 1 | 0 | 1 | 1 | 0 | 0 | 55 | 7.5 | 45 |
| 1 | 0 | 1 | 1 | 0 | 0 | 56 | 7.5 | 45 |
| 1 | 0 | 1 | 1 | 0 | 0 | 57 | 7.5 | 45 |
| 1 | 0 | 1 | 1 | 0 | 0 | 58 | 7.5 | 45 |
| 1 | 0 | 1 | 1 | 0 | 0 | 59 | 7.5 | 45 |
| 1 | 0 | 1 | 1 | 0 | 0 | 60 | 7.5 | 45 |
| 1 | 0 | 1 | 1 | 0 | 0 | 61 | 7.5 | 45 |
| 1 | 0 | 1 | 1 | 0 | 0 | 62 | 7.5 | 45 |
| 1 | 0 | 1 | 1 | 0 | 0 | 63 | 7.5 | 45 |
| 1 | 0 | 1 | 1 | 0 | 0 | 64 | 7.5 | 45 |
| 1 | 0 | 1 | 1 | 0 | 0 | 65 | 7.5 | 45 |
| 1 | 0 | 1 | 1 | 0 | 0 | 66 | 7.5 | 45 |
| 1 | 0 | 1 | 1 | 0 | 0 | 67 | 7.5 | 45 |
| 1 | 0 | 1 | 1 | 0 | 0 | 68 | 7.5 | 45 |
| 1 | 0 | 1 | 1 | 0 | 0 | 69 | 7.5 | 45 |
| 1 | 0 | 1 | 1 | 0 | 0 | 70 | 7.5 | 45 |
| 1 | 0 | 1 | 1 | 0 | 0 | 71 | 7.5 | 45 |
| 1 | 0 | 1 | 1 | 0 | 0 | 72 | 7.5 | 45 |
| 1 | 0 | 1 | 1 | 0 | 0 | 73 | 7.5 | 45 |
| 1 | 0 | 1 | 1 | 0 | 0 | 74 | 7.5 | 45 |
| 1 | 0 | 1 | 1 | 0 | 0 | 75 | 7.5 | 45 |
| 1 | 0 | 1 | 1 | 0 | 0 | 76 | 7.5 | 45 |
| 1 | 0 | 1 | 1 | 0 | 0 | 77 | 7.5 | 45 |
| 1 | 0 | 1 | 1 | 0 | 0 | 78 | 7.5 | 45 |
| 1 | 0 | 1 | 1 | 0 | 0 | 79 | 7.5 | 45 |
| 1 | 0 | 1 | 1 | 0 | 0 | 80 | 7.5 | 45 |
| 1 | 0 | 1 | 1 | 0 | 0 | 81 | 7.5 | 45 |
| 1 | 0 | 1 | 1 | 0 | 0 | 82 | 7.5 | 45 |
| 1 | 0 | 1 | 1 | 0 | 0 | 83 | 7.5 | 45 |
| 1 | 0 | 1 | 1 | 0 | 0 | 84 | 7.5 | 45 |

|   |   |   |   |   |   |     |     |     |
|---|---|---|---|---|---|-----|-----|-----|
| 1 | 0 | 1 | 1 | 0 | 0 | 85  | 7.5 | 45  |
| 1 | 0 | 1 | 1 | 0 | 0 | 86  | 7.5 | 45  |
| 1 | 0 | 1 | 1 | 0 | 0 | 87  | 7.5 | 45  |
| 1 | 0 | 1 | 1 | 0 | 0 | 88  | 7.5 | 45  |
| 1 | 0 | 1 | 1 | 0 | 0 | 89  | 7.5 | 45  |
| 1 | 0 | 1 | 1 | 0 | 0 | 90  | 7.5 | 135 |
| 1 | 0 | 1 | 1 | 0 | 0 | 91  | 7.5 | 135 |
| 1 | 0 | 1 | 1 | 0 | 0 | 92  | 7.5 | 135 |
| 1 | 0 | 1 | 1 | 0 | 0 | 93  | 7.5 | 135 |
| 1 | 0 | 1 | 1 | 0 | 0 | 94  | 7.5 | 135 |
| 1 | 0 | 1 | 1 | 0 | 0 | 95  | 7.5 | 135 |
| 1 | 0 | 1 | 1 | 0 | 0 | 96  | 7.5 | 135 |
| 1 | 0 | 1 | 1 | 0 | 0 | 97  | 7.5 | 135 |
| 1 | 0 | 1 | 1 | 0 | 0 | 98  | 7.5 | 135 |
| 1 | 0 | 1 | 1 | 0 | 0 | 99  | 7.5 | 135 |
| 1 | 0 | 1 | 1 | 0 | 0 | 100 | 7.5 | 135 |
| 1 | 0 | 1 | 1 | 0 | 0 | 101 | 7.5 | 135 |
| 1 | 0 | 1 | 1 | 0 | 0 | 102 | 7.5 | 135 |
| 1 | 0 | 1 | 1 | 0 | 0 | 103 | 7.5 | 135 |
| 1 | 0 | 1 | 1 | 0 | 0 | 104 | 7.5 | 135 |
| 1 | 0 | 1 | 1 | 0 | 0 | 105 | 7.5 | 135 |
| 1 | 0 | 1 | 1 | 0 | 0 | 106 | 7.5 | 135 |
| 1 | 0 | 1 | 1 | 0 | 0 | 107 | 7.5 | 135 |
| 1 | 0 | 1 | 1 | 0 | 0 | 108 | 7.5 | 135 |
| 1 | 0 | 1 | 1 | 0 | 0 | 109 | 7.5 | 135 |
| 1 | 0 | 1 | 1 | 0 | 0 | 110 | 7.5 | 135 |
| 1 | 0 | 1 | 1 | 0 | 0 | 111 | 7.5 | 135 |
| 1 | 0 | 1 | 1 | 0 | 0 | 112 | 7.5 | 135 |
| 1 | 0 | 1 | 1 | 0 | 0 | 113 | 7.5 | 135 |
| 1 | 0 | 1 | 1 | 0 | 0 | 114 | 7.5 | 135 |
| 1 | 0 | 1 | 1 | 0 | 0 | 115 | 7.5 | 135 |
| 1 | 0 | 1 | 1 | 0 | 0 | 116 | 7.5 | 135 |
| 1 | 0 | 1 | 1 | 0 | 0 | 117 | 7.5 | 135 |
| 1 | 0 | 1 | 1 | 0 | 0 | 118 | 7.5 | 135 |
| 1 | 0 | 1 | 1 | 0 | 0 | 119 | 7.5 | 135 |
| 1 | 0 | 1 | 1 | 0 | 0 | 120 | 7.5 | 135 |
| 1 | 0 | 1 | 1 | 0 | 0 | 121 | 7.5 | 135 |
| 1 | 0 | 1 | 1 | 0 | 0 | 122 | 7.5 | 135 |
| 1 | 0 | 1 | 1 | 0 | 0 | 123 | 7.5 | 135 |
| 1 | 0 | 1 | 1 | 0 | 0 | 124 | 7.5 | 135 |
| 1 | 0 | 1 | 1 | 0 | 0 | 125 | 7.5 | 135 |
| 1 | 0 | 1 | 1 | 0 | 0 | 126 | 7.5 | 135 |
| 1 | 0 | 1 | 1 | 0 | 0 | 127 | 7.5 | 135 |
| 1 | 0 | 1 | 1 | 0 | 0 | 128 | 7.5 | 135 |
| 1 | 0 | 1 | 1 | 0 | 0 | 129 | 7.5 | 135 |
| 1 | 0 | 1 | 1 | 0 | 0 | 130 | 7.5 | 135 |

|   |   |   |   |   |   |     |     |     |
|---|---|---|---|---|---|-----|-----|-----|
| 1 | 0 | 1 | 1 | 0 | 0 | 131 | 7.5 | 135 |
| 1 | 0 | 1 | 1 | 0 | 0 | 132 | 7.5 | 135 |
| 1 | 0 | 1 | 1 | 0 | 0 | 133 | 7.5 | 135 |
| 1 | 0 | 1 | 1 | 0 | 0 | 134 | 7.5 | 135 |
| 1 | 0 | 1 | 1 | 0 | 0 | 135 | 7.5 | 135 |
| 1 | 0 | 1 | 1 | 0 | 0 | 136 | 7.5 | 135 |
| 1 | 0 | 1 | 1 | 0 | 0 | 137 | 7.5 | 135 |
| 1 | 0 | 1 | 1 | 0 | 0 | 138 | 7.5 | 135 |
| 1 | 0 | 1 | 1 | 0 | 0 | 139 | 7.5 | 135 |
| 1 | 0 | 1 | 1 | 0 | 0 | 140 | 7.5 | 135 |
| 1 | 0 | 1 | 1 | 0 | 0 | 141 | 7.5 | 135 |
| 1 | 0 | 1 | 1 | 0 | 0 | 142 | 7.5 | 135 |
| 1 | 0 | 1 | 1 | 0 | 0 | 143 | 7.5 | 135 |
| 1 | 0 | 1 | 1 | 0 | 0 | 144 | 7.5 | 135 |
| 1 | 0 | 1 | 1 | 0 | 0 | 145 | 7.5 | 135 |
| 1 | 0 | 1 | 1 | 0 | 0 | 146 | 7.5 | 135 |
| 1 | 0 | 1 | 1 | 0 | 0 | 147 | 7.5 | 135 |
| 1 | 0 | 1 | 1 | 0 | 0 | 148 | 7.5 | 135 |
| 1 | 0 | 1 | 1 | 0 | 0 | 149 | 7.5 | 135 |
| 1 | 0 | 1 | 1 | 0 | 0 | 150 | 7.5 | 150 |
| 1 | 0 | 1 | 1 | 0 | 0 | 151 | 7.5 | 165 |
| 1 | 0 | 1 | 1 | 0 | 0 | 152 | 7.5 | 165 |
| 1 | 0 | 1 | 1 | 0 | 0 | 153 | 7.5 | 165 |
| 1 | 0 | 1 | 1 | 0 | 0 | 154 | 7.5 | 165 |
| 1 | 0 | 1 | 1 | 0 | 0 | 155 | 7.5 | 165 |
| 1 | 0 | 1 | 1 | 0 | 0 | 156 | 7.5 | 165 |
| 1 | 0 | 1 | 1 | 0 | 0 | 157 | 7.5 | 165 |
| 1 | 0 | 1 | 1 | 0 | 0 | 158 | 7.5 | 165 |
| 1 | 0 | 1 | 1 | 0 | 0 | 159 | 7.5 | 165 |
| 1 | 0 | 1 | 1 | 0 | 0 | 160 | 7.5 | 165 |
| 1 | 0 | 1 | 1 | 0 | 0 | 161 | 7.5 | 165 |
| 1 | 0 | 1 | 1 | 0 | 0 | 162 | 7.5 | 165 |
| 1 | 0 | 1 | 1 | 0 | 0 | 163 | 7.5 | 165 |
| 1 | 0 | 1 | 1 | 0 | 0 | 164 | 7.5 | 165 |
| 1 | 0 | 1 | 1 | 0 | 0 | 165 | 7.5 | 165 |
| 1 | 0 | 1 | 1 | 0 | 0 | 166 | 7.5 | 165 |
| 1 | 0 | 1 | 1 | 0 | 0 | 167 | 7.5 | 165 |
| 1 | 0 | 1 | 1 | 0 | 0 | 168 | 7.5 | 165 |
| 1 | 0 | 1 | 1 | 0 | 0 | 169 | 7.5 | 165 |
| 1 | 0 | 1 | 1 | 0 | 0 | 170 | 7.5 | 165 |
| 1 | 0 | 1 | 1 | 0 | 0 | 171 | 7.5 | 165 |
| 1 | 0 | 1 | 1 | 0 | 0 | 172 | 7.5 | 165 |
| 1 | 0 | 1 | 1 | 0 | 0 | 173 | 7.5 | 165 |
| 1 | 0 | 1 | 1 | 0 | 0 | 174 | 7.5 | 165 |
| 1 | 0 | 1 | 1 | 0 | 0 | 175 | 7.5 | 165 |
| 1 | 0 | 1 | 1 | 0 | 0 | 176 | 7.5 | 165 |

|   |   |   |   |   |   |     |     |     |
|---|---|---|---|---|---|-----|-----|-----|
| 1 | 0 | 1 | 1 | 0 | 0 | 177 | 7.5 | 165 |
| 1 | 0 | 1 | 1 | 0 | 0 | 178 | 7.5 | 165 |
| 1 | 0 | 1 | 1 | 0 | 0 | 179 | 7.5 | 165 |
| 1 | 0 | 1 | 1 | 0 | 0 | 180 | 7.5 | 180 |
| 1 | 0 | 1 | 0 | 1 | 0 | 0   | 7.5 | 45  |
| 1 | 0 | 1 | 0 | 1 | 0 | 1   | 7.5 | 45  |
| 1 | 0 | 1 | 0 | 1 | 0 | 2   | 7.5 | 45  |
| 1 | 0 | 1 | 0 | 1 | 0 | 3   | 7.5 | 45  |
| 1 | 0 | 1 | 0 | 1 | 0 | 4   | 7.5 | 45  |
| 1 | 0 | 1 | 0 | 1 | 0 | 5   | 7.5 | 45  |
| 1 | 0 | 1 | 0 | 1 | 0 | 6   | 7.5 | 45  |
| 1 | 0 | 1 | 0 | 1 | 0 | 7   | 7.5 | 45  |
| 1 | 0 | 1 | 0 | 1 | 0 | 8   | 7.5 | 45  |
| 1 | 0 | 1 | 0 | 1 | 0 | 9   | 7.5 | 45  |
| 1 | 0 | 1 | 0 | 1 | 0 | 10  | 7.5 | 45  |
| 1 | 0 | 1 | 0 | 1 | 0 | 11  | 7.5 | 45  |
| 1 | 0 | 1 | 0 | 1 | 0 | 12  | 7.5 | 45  |
| 1 | 0 | 1 | 0 | 1 | 0 | 13  | 7.5 | 45  |
| 1 | 0 | 1 | 0 | 1 | 0 | 14  | 7.5 | 45  |
| 1 | 0 | 1 | 0 | 1 | 0 | 15  | 7.5 | 45  |
| 1 | 0 | 1 | 0 | 1 | 0 | 16  | 7.5 | 45  |
| 1 | 0 | 1 | 0 | 1 | 0 | 17  | 7.5 | 45  |
| 1 | 0 | 1 | 0 | 1 | 0 | 18  | 7.5 | 45  |
| 1 | 0 | 1 | 0 | 1 | 0 | 19  | 7.5 | 45  |
| 1 | 0 | 1 | 0 | 1 | 0 | 20  | 7.5 | 45  |
| 1 | 0 | 1 | 0 | 1 | 0 | 21  | 7.5 | 45  |
| 1 | 0 | 1 | 0 | 1 | 0 | 22  | 7.5 | 45  |
| 1 | 0 | 1 | 0 | 1 | 0 | 23  | 7.5 | 45  |
| 1 | 0 | 1 | 0 | 1 | 0 | 24  | 7.5 | 45  |
| 1 | 0 | 1 | 0 | 1 | 0 | 25  | 7.5 | 45  |
| 1 | 0 | 1 | 0 | 1 | 0 | 26  | 7.5 | 45  |
| 1 | 0 | 1 | 0 | 1 | 0 | 27  | 7.5 | 45  |
| 1 | 0 | 1 | 0 | 1 | 0 | 28  | 7.5 | 45  |
| 1 | 0 | 1 | 0 | 1 | 0 | 29  | 7.5 | 45  |
| 1 | 0 | 1 | 0 | 1 | 0 | 30  | 7.5 | 45  |
| 1 | 0 | 1 | 0 | 1 | 0 | 31  | 7.5 | 45  |
| 1 | 0 | 1 | 0 | 1 | 0 | 32  | 7.5 | 45  |
| 1 | 0 | 1 | 0 | 1 | 0 | 33  | 7.5 | 45  |
| 1 | 0 | 1 | 0 | 1 | 0 | 34  | 7.5 | 45  |
| 1 | 0 | 1 | 0 | 1 | 0 | 35  | 7.5 | 45  |
| 1 | 0 | 1 | 0 | 1 | 0 | 36  | 7.5 | 45  |
| 1 | 0 | 1 | 0 | 1 | 0 | 37  | 7.5 | 45  |
| 1 | 0 | 1 | 0 | 1 | 0 | 38  | 7.5 | 45  |
| 1 | 0 | 1 | 0 | 1 | 0 | 39  | 7.5 | 45  |
| 1 | 0 | 1 | 0 | 1 | 0 | 40  | 7.5 | 45  |
| 1 | 0 | 1 | 0 | 1 | 0 | 41  | 7.5 | 45  |

|   |   |   |   |   |   |    |     |     |
|---|---|---|---|---|---|----|-----|-----|
| 1 | 0 | 1 | 0 | 1 | 0 | 42 | 7.5 | 45  |
| 1 | 0 | 1 | 0 | 1 | 0 | 43 | 7.5 | 45  |
| 1 | 0 | 1 | 0 | 1 | 0 | 44 | 7.5 | 45  |
| 1 | 0 | 1 | 0 | 1 | 0 | 45 | 7.5 | 45  |
| 1 | 0 | 1 | 0 | 1 | 0 | 46 | 7.5 | 45  |
| 1 | 0 | 1 | 0 | 1 | 0 | 47 | 7.5 | 45  |
| 1 | 0 | 1 | 0 | 1 | 0 | 48 | 7.5 | 45  |
| 1 | 0 | 1 | 0 | 1 | 0 | 49 | 7.5 | 45  |
| 1 | 0 | 1 | 0 | 1 | 0 | 50 | 7.5 | 45  |
| 1 | 0 | 1 | 0 | 1 | 0 | 51 | 7.5 | 45  |
| 1 | 0 | 1 | 0 | 1 | 0 | 52 | 7.5 | 45  |
| 1 | 0 | 1 | 0 | 1 | 0 | 53 | 7.5 | 45  |
| 1 | 0 | 1 | 0 | 1 | 0 | 54 | 7.5 | 45  |
| 1 | 0 | 1 | 0 | 1 | 0 | 55 | 7.5 | 45  |
| 1 | 0 | 1 | 0 | 1 | 0 | 56 | 7.5 | 45  |
| 1 | 0 | 1 | 0 | 1 | 0 | 57 | 7.5 | 45  |
| 1 | 0 | 1 | 0 | 1 | 0 | 58 | 7.5 | 45  |
| 1 | 0 | 1 | 0 | 1 | 0 | 59 | 7.5 | 45  |
| 1 | 0 | 1 | 0 | 1 | 0 | 60 | 7.5 | 45  |
| 1 | 0 | 1 | 0 | 1 | 0 | 61 | 7.5 | 45  |
| 1 | 0 | 1 | 0 | 1 | 0 | 62 | 7.5 | 45  |
| 1 | 0 | 1 | 0 | 1 | 0 | 63 | 7.5 | 45  |
| 1 | 0 | 1 | 0 | 1 | 0 | 64 | 7.5 | 45  |
| 1 | 0 | 1 | 0 | 1 | 0 | 65 | 7.5 | 45  |
| 1 | 0 | 1 | 0 | 1 | 0 | 66 | 7.5 | 45  |
| 1 | 0 | 1 | 0 | 1 | 0 | 67 | 7.5 | 45  |
| 1 | 0 | 1 | 0 | 1 | 0 | 68 | 7.5 | 45  |
| 1 | 0 | 1 | 0 | 1 | 0 | 69 | 7.5 | 45  |
| 1 | 0 | 1 | 0 | 1 | 0 | 70 | 7.5 | 45  |
| 1 | 0 | 1 | 0 | 1 | 0 | 71 | 7.5 | 45  |
| 1 | 0 | 1 | 0 | 1 | 0 | 72 | 7.5 | 45  |
| 1 | 0 | 1 | 0 | 1 | 0 | 73 | 7.5 | 45  |
| 1 | 0 | 1 | 0 | 1 | 0 | 74 | 7.5 | 45  |
| 1 | 0 | 1 | 0 | 1 | 0 | 75 | 7.5 | 45  |
| 1 | 0 | 1 | 0 | 1 | 0 | 76 | 7.5 | 105 |
| 1 | 0 | 1 | 0 | 1 | 0 | 77 | 7.5 | 105 |
| 1 | 0 | 1 | 0 | 1 | 0 | 78 | 7.5 | 105 |
| 1 | 0 | 1 | 0 | 1 | 0 | 79 | 7.5 | 105 |
| 1 | 0 | 1 | 0 | 1 | 0 | 80 | 7.5 | 105 |
| 1 | 0 | 1 | 0 | 1 | 0 | 81 | 7.5 | 105 |
| 1 | 0 | 1 | 0 | 1 | 0 | 82 | 7.5 | 105 |
| 1 | 0 | 1 | 0 | 1 | 0 | 83 | 7.5 | 105 |
| 1 | 0 | 1 | 0 | 1 | 0 | 84 | 7.5 | 105 |
| 1 | 0 | 1 | 0 | 1 | 0 | 85 | 7.5 | 105 |
| 1 | 0 | 1 | 0 | 1 | 0 | 86 | 7.5 | 105 |
| 1 | 0 | 1 | 0 | 1 | 0 | 87 | 7.5 | 105 |

|   |   |   |   |   |   |     |     |     |
|---|---|---|---|---|---|-----|-----|-----|
| 1 | 0 | 1 | 0 | 1 | 0 | 88  | 7.5 | 105 |
| 1 | 0 | 1 | 0 | 1 | 0 | 89  | 7.5 | 105 |
| 1 | 0 | 1 | 0 | 1 | 0 | 90  | 7.5 | 105 |
| 1 | 0 | 1 | 0 | 1 | 0 | 91  | 7.5 | 105 |
| 1 | 0 | 1 | 0 | 1 | 0 | 92  | 7.5 | 105 |
| 1 | 0 | 1 | 0 | 1 | 0 | 93  | 7.5 | 105 |
| 1 | 0 | 1 | 0 | 1 | 0 | 94  | 7.5 | 105 |
| 1 | 0 | 1 | 0 | 1 | 0 | 95  | 7.5 | 105 |
| 1 | 0 | 1 | 0 | 1 | 0 | 96  | 7.5 | 105 |
| 1 | 0 | 1 | 0 | 1 | 0 | 97  | 7.5 | 105 |
| 1 | 0 | 1 | 0 | 1 | 0 | 98  | 7.5 | 105 |
| 1 | 0 | 1 | 0 | 1 | 0 | 99  | 7.5 | 105 |
| 1 | 0 | 1 | 0 | 1 | 0 | 100 | 7.5 | 105 |
| 1 | 0 | 1 | 0 | 1 | 0 | 101 | 7.5 | 105 |
| 1 | 0 | 1 | 0 | 1 | 0 | 102 | 7.5 | 105 |
| 1 | 0 | 1 | 0 | 1 | 0 | 103 | 7.5 | 105 |
| 1 | 0 | 1 | 0 | 1 | 0 | 104 | 7.5 | 105 |
| 1 | 0 | 1 | 0 | 1 | 0 | 105 | 7.5 | 105 |
| 1 | 0 | 1 | 0 | 1 | 0 | 106 | 7.5 | 105 |
| 1 | 0 | 1 | 0 | 1 | 0 | 107 | 7.5 | 105 |
| 1 | 0 | 1 | 0 | 1 | 0 | 108 | 7.5 | 105 |
| 1 | 0 | 1 | 0 | 1 | 0 | 109 | 7.5 | 105 |
| 1 | 0 | 1 | 0 | 1 | 0 | 110 | 7.5 | 105 |
| 1 | 0 | 1 | 0 | 1 | 0 | 111 | 7.5 | 105 |
| 1 | 0 | 1 | 0 | 1 | 0 | 112 | 7.5 | 105 |
| 1 | 0 | 1 | 0 | 1 | 0 | 113 | 7.5 | 105 |
| 1 | 0 | 1 | 0 | 1 | 0 | 114 | 7.5 | 105 |
| 1 | 0 | 1 | 0 | 1 | 0 | 115 | 7.5 | 105 |
| 1 | 0 | 1 | 0 | 1 | 0 | 116 | 7.5 | 105 |
| 1 | 0 | 1 | 0 | 1 | 0 | 117 | 7.5 | 105 |
| 1 | 0 | 1 | 0 | 1 | 0 | 118 | 7.5 | 105 |
| 1 | 0 | 1 | 0 | 1 | 0 | 119 | 7.5 | 105 |
| 1 | 0 | 1 | 0 | 1 | 0 | 120 | 7.5 | 105 |
| 1 | 0 | 1 | 0 | 1 | 0 | 121 | 7.5 | 105 |
| 1 | 0 | 1 | 0 | 1 | 0 | 122 | 7.5 | 105 |
| 1 | 0 | 1 | 0 | 1 | 0 | 123 | 7.5 | 105 |
| 1 | 0 | 1 | 0 | 1 | 0 | 124 | 7.5 | 105 |
| 1 | 0 | 1 | 0 | 1 | 0 | 125 | 7.5 | 105 |
| 1 | 0 | 1 | 0 | 1 | 0 | 126 | 7.5 | 105 |
| 1 | 0 | 1 | 0 | 1 | 0 | 127 | 7.5 | 105 |
| 1 | 0 | 1 | 0 | 1 | 0 | 128 | 7.5 | 105 |
| 1 | 0 | 1 | 0 | 1 | 0 | 129 | 7.5 | 105 |
| 1 | 0 | 1 | 0 | 1 | 0 | 130 | 7.5 | 105 |
| 1 | 0 | 1 | 0 | 1 | 0 | 131 | 7.5 | 105 |
| 1 | 0 | 1 | 0 | 1 | 0 | 132 | 7.5 | 105 |
| 1 | 0 | 1 | 0 | 1 | 0 | 133 | 7.5 | 105 |

|   |   |   |   |   |   |     |     |     |
|---|---|---|---|---|---|-----|-----|-----|
| 1 | 0 | 1 | 0 | 1 | 0 | 134 | 7.5 | 105 |
| 1 | 0 | 1 | 0 | 1 | 0 | 135 | 7.5 | 105 |
| 1 | 0 | 1 | 0 | 1 | 0 | 136 | 7.5 | 165 |
| 1 | 0 | 1 | 0 | 1 | 0 | 137 | 7.5 | 165 |
| 1 | 0 | 1 | 0 | 1 | 0 | 138 | 7.5 | 165 |
| 1 | 0 | 1 | 0 | 1 | 0 | 139 | 7.5 | 165 |
| 1 | 0 | 1 | 0 | 1 | 0 | 140 | 7.5 | 165 |
| 1 | 0 | 1 | 0 | 1 | 0 | 141 | 7.5 | 165 |
| 1 | 0 | 1 | 0 | 1 | 0 | 142 | 7.5 | 165 |
| 1 | 0 | 1 | 0 | 1 | 0 | 143 | 7.5 | 165 |
| 1 | 0 | 1 | 0 | 1 | 0 | 144 | 7.5 | 165 |
| 1 | 0 | 1 | 0 | 1 | 0 | 145 | 7.5 | 165 |
| 1 | 0 | 1 | 0 | 1 | 0 | 146 | 7.5 | 165 |
| 1 | 0 | 1 | 0 | 1 | 0 | 147 | 7.5 | 165 |
| 1 | 0 | 1 | 0 | 1 | 0 | 148 | 7.5 | 165 |
| 1 | 0 | 1 | 0 | 1 | 0 | 149 | 7.5 | 165 |
| 1 | 0 | 1 | 0 | 1 | 0 | 150 | 7.5 | 165 |
| 1 | 0 | 1 | 0 | 1 | 0 | 151 | 7.5 | 165 |
| 1 | 0 | 1 | 0 | 1 | 0 | 152 | 7.5 | 165 |
| 1 | 0 | 1 | 0 | 1 | 0 | 153 | 7.5 | 165 |
| 1 | 0 | 1 | 0 | 1 | 0 | 154 | 7.5 | 165 |
| 1 | 0 | 1 | 0 | 1 | 0 | 155 | 7.5 | 165 |
| 1 | 0 | 1 | 0 | 1 | 0 | 156 | 7.5 | 165 |
| 1 | 0 | 1 | 0 | 1 | 0 | 157 | 7.5 | 165 |
| 1 | 0 | 1 | 0 | 1 | 0 | 158 | 7.5 | 165 |
| 1 | 0 | 1 | 0 | 1 | 0 | 159 | 7.5 | 165 |
| 1 | 0 | 1 | 0 | 1 | 0 | 160 | 7.5 | 165 |
| 1 | 0 | 1 | 0 | 1 | 0 | 161 | 7.5 | 165 |
| 1 | 0 | 1 | 0 | 1 | 0 | 162 | 7.5 | 165 |
| 1 | 0 | 1 | 0 | 1 | 0 | 163 | 7.5 | 165 |
| 1 | 0 | 1 | 0 | 1 | 0 | 164 | 7.5 | 165 |
| 1 | 0 | 1 | 0 | 1 | 0 | 165 | 7.5 | 165 |
| 1 | 0 | 1 | 0 | 1 | 0 | 166 | 7.5 | 165 |
| 1 | 0 | 1 | 0 | 1 | 0 | 167 | 7.5 | 165 |
| 1 | 0 | 1 | 0 | 1 | 0 | 168 | 7.5 | 165 |
| 1 | 0 | 1 | 0 | 1 | 0 | 169 | 7.5 | 165 |
| 1 | 0 | 1 | 0 | 1 | 0 | 170 | 7.5 | 165 |
| 1 | 0 | 1 | 0 | 1 | 0 | 171 | 7.5 | 165 |
| 1 | 0 | 1 | 0 | 1 | 0 | 172 | 7.5 | 165 |
| 1 | 0 | 1 | 0 | 1 | 0 | 173 | 7.5 | 165 |
| 1 | 0 | 1 | 0 | 1 | 0 | 174 | 7.5 | 165 |
| 1 | 0 | 1 | 0 | 1 | 0 | 175 | 7.5 | 165 |
| 1 | 0 | 1 | 0 | 1 | 0 | 176 | 7.5 | 165 |
| 1 | 0 | 1 | 0 | 1 | 0 | 177 | 7.5 | 165 |
| 1 | 0 | 1 | 0 | 1 | 0 | 178 | 7.5 | 165 |
| 1 | 0 | 1 | 0 | 1 | 0 | 179 | 7.5 | 165 |

|   |   |   |   |   |   |     |     |     |
|---|---|---|---|---|---|-----|-----|-----|
| 1 | 0 | 1 | 0 | 1 | 0 | 180 | 7.5 | 180 |
| 1 | 0 | 1 | 0 | 0 | 1 | 0   | 7.5 | 45  |
| 1 | 0 | 1 | 0 | 0 | 1 | 1   | 7.5 | 45  |
| 1 | 0 | 1 | 0 | 0 | 1 | 2   | 7.5 | 45  |
| 1 | 0 | 1 | 0 | 0 | 1 | 3   | 7.5 | 45  |
| 1 | 0 | 1 | 0 | 0 | 1 | 4   | 7.5 | 45  |
| 1 | 0 | 1 | 0 | 0 | 1 | 5   | 7.5 | 45  |
| 1 | 0 | 1 | 0 | 0 | 1 | 6   | 7.5 | 45  |
| 1 | 0 | 1 | 0 | 0 | 1 | 7   | 7.5 | 45  |
| 1 | 0 | 1 | 0 | 0 | 1 | 8   | 7.5 | 45  |
| 1 | 0 | 1 | 0 | 0 | 1 | 9   | 7.5 | 45  |
| 1 | 0 | 1 | 0 | 0 | 1 | 10  | 7.5 | 45  |
| 1 | 0 | 1 | 0 | 0 | 1 | 11  | 7.5 | 45  |
| 1 | 0 | 1 | 0 | 0 | 1 | 12  | 7.5 | 45  |
| 1 | 0 | 1 | 0 | 0 | 1 | 13  | 7.5 | 45  |
| 1 | 0 | 1 | 0 | 0 | 1 | 14  | 7.5 | 45  |
| 1 | 0 | 1 | 0 | 0 | 1 | 15  | 7.5 | 45  |
| 1 | 0 | 1 | 0 | 0 | 1 | 16  | 7.5 | 45  |
| 1 | 0 | 1 | 0 | 0 | 1 | 17  | 7.5 | 45  |
| 1 | 0 | 1 | 0 | 0 | 1 | 18  | 7.5 | 45  |
| 1 | 0 | 1 | 0 | 0 | 1 | 19  | 7.5 | 45  |
| 1 | 0 | 1 | 0 | 0 | 1 | 20  | 7.5 | 45  |
| 1 | 0 | 1 | 0 | 0 | 1 | 21  | 7.5 | 45  |
| 1 | 0 | 1 | 0 | 0 | 1 | 22  | 7.5 | 45  |
| 1 | 0 | 1 | 0 | 0 | 1 | 23  | 7.5 | 45  |
| 1 | 0 | 1 | 0 | 0 | 1 | 24  | 7.5 | 45  |
| 1 | 0 | 1 | 0 | 0 | 1 | 25  | 7.5 | 45  |
| 1 | 0 | 1 | 0 | 0 | 1 | 26  | 7.5 | 45  |
| 1 | 0 | 1 | 0 | 0 | 1 | 27  | 7.5 | 45  |
| 1 | 0 | 1 | 0 | 0 | 1 | 28  | 7.5 | 45  |
| 1 | 0 | 1 | 0 | 0 | 1 | 29  | 7.5 | 45  |
| 1 | 0 | 1 | 0 | 0 | 1 | 30  | 7.5 | 45  |
| 1 | 0 | 1 | 0 | 0 | 1 | 31  | 7.5 | 45  |
| 1 | 0 | 1 | 0 | 0 | 1 | 32  | 7.5 | 45  |
| 1 | 0 | 1 | 0 | 0 | 1 | 33  | 7.5 | 45  |
| 1 | 0 | 1 | 0 | 0 | 1 | 34  | 7.5 | 45  |
| 1 | 0 | 1 | 0 | 0 | 1 | 35  | 7.5 | 45  |
| 1 | 0 | 1 | 0 | 0 | 1 | 36  | 7.5 | 45  |
| 1 | 0 | 1 | 0 | 0 | 1 | 37  | 7.5 | 45  |
| 1 | 0 | 1 | 0 | 0 | 1 | 38  | 7.5 | 45  |
| 1 | 0 | 1 | 0 | 0 | 1 | 39  | 7.5 | 45  |
| 1 | 0 | 1 | 0 | 0 | 1 | 40  | 7.5 | 45  |
| 1 | 0 | 1 | 0 | 0 | 1 | 41  | 7.5 | 45  |
| 1 | 0 | 1 | 0 | 0 | 1 | 42  | 7.5 | 45  |
| 1 | 0 | 1 | 0 | 0 | 1 | 43  | 7.5 | 45  |
| 1 | 0 | 1 | 0 | 0 | 1 | 44  | 7.5 | 45  |

|   |   |   |   |   |   |    |     |     |
|---|---|---|---|---|---|----|-----|-----|
| 1 | 0 | 1 | 0 | 0 | 1 | 45 | 7.5 | 45  |
| 1 | 0 | 1 | 0 | 0 | 1 | 46 | 7.5 | 45  |
| 1 | 0 | 1 | 0 | 0 | 1 | 47 | 7.5 | 45  |
| 1 | 0 | 1 | 0 | 0 | 1 | 48 | 7.5 | 45  |
| 1 | 0 | 1 | 0 | 0 | 1 | 49 | 7.5 | 45  |
| 1 | 0 | 1 | 0 | 0 | 1 | 50 | 7.5 | 45  |
| 1 | 0 | 1 | 0 | 0 | 1 | 51 | 7.5 | 45  |
| 1 | 0 | 1 | 0 | 0 | 1 | 52 | 7.5 | 45  |
| 1 | 0 | 1 | 0 | 0 | 1 | 53 | 7.5 | 45  |
| 1 | 0 | 1 | 0 | 0 | 1 | 54 | 7.5 | 45  |
| 1 | 0 | 1 | 0 | 0 | 1 | 55 | 7.5 | 45  |
| 1 | 0 | 1 | 0 | 0 | 1 | 56 | 7.5 | 45  |
| 1 | 0 | 1 | 0 | 0 | 1 | 57 | 7.5 | 45  |
| 1 | 0 | 1 | 0 | 0 | 1 | 58 | 7.5 | 45  |
| 1 | 0 | 1 | 0 | 0 | 1 | 59 | 7.5 | 45  |
| 1 | 0 | 1 | 0 | 0 | 1 | 60 | 7.5 | 45  |
| 1 | 0 | 1 | 0 | 0 | 1 | 61 | 7.5 | 45  |
| 1 | 0 | 1 | 0 | 0 | 1 | 62 | 7.5 | 45  |
| 1 | 0 | 1 | 0 | 0 | 1 | 63 | 7.5 | 45  |
| 1 | 0 | 1 | 0 | 0 | 1 | 64 | 7.5 | 45  |
| 1 | 0 | 1 | 0 | 0 | 1 | 65 | 7.5 | 45  |
| 1 | 0 | 1 | 0 | 0 | 1 | 66 | 7.5 | 45  |
| 1 | 0 | 1 | 0 | 0 | 1 | 67 | 7.5 | 45  |
| 1 | 0 | 1 | 0 | 0 | 1 | 68 | 7.5 | 45  |
| 1 | 0 | 1 | 0 | 0 | 1 | 69 | 7.5 | 45  |
| 1 | 0 | 1 | 0 | 0 | 1 | 70 | 7.5 | 45  |
| 1 | 0 | 1 | 0 | 0 | 1 | 71 | 7.5 | 45  |
| 1 | 0 | 1 | 0 | 0 | 1 | 72 | 7.5 | 45  |
| 1 | 0 | 1 | 0 | 0 | 1 | 73 | 7.5 | 45  |
| 1 | 0 | 1 | 0 | 0 | 1 | 74 | 7.5 | 45  |
| 1 | 0 | 1 | 0 | 0 | 1 | 75 | 7.5 | 45  |
| 1 | 0 | 1 | 0 | 0 | 1 | 76 | 7.5 | 105 |
| 1 | 0 | 1 | 0 | 0 | 1 | 77 | 7.5 | 105 |
| 1 | 0 | 1 | 0 | 0 | 1 | 78 | 7.5 | 105 |
| 1 | 0 | 1 | 0 | 0 | 1 | 79 | 7.5 | 105 |
| 1 | 0 | 1 | 0 | 0 | 1 | 80 | 7.5 | 105 |
| 1 | 0 | 1 | 0 | 0 | 1 | 81 | 7.5 | 105 |
| 1 | 0 | 1 | 0 | 0 | 1 | 82 | 7.5 | 105 |
| 1 | 0 | 1 | 0 | 0 | 1 | 83 | 7.5 | 105 |
| 1 | 0 | 1 | 0 | 0 | 1 | 84 | 7.5 | 105 |
| 1 | 0 | 1 | 0 | 0 | 1 | 85 | 7.5 | 105 |
| 1 | 0 | 1 | 0 | 0 | 1 | 86 | 7.5 | 105 |
| 1 | 0 | 1 | 0 | 0 | 1 | 87 | 7.5 | 105 |
| 1 | 0 | 1 | 0 | 0 | 1 | 88 | 7.5 | 105 |
| 1 | 0 | 1 | 0 | 0 | 1 | 89 | 7.5 | 105 |
| 1 | 0 | 1 | 0 | 0 | 1 | 90 | 7.5 | 105 |

|   |   |   |   |   |   |     |     |     |
|---|---|---|---|---|---|-----|-----|-----|
| 1 | 0 | 1 | 0 | 0 | 1 | 91  | 7.5 | 105 |
| 1 | 0 | 1 | 0 | 0 | 1 | 92  | 7.5 | 105 |
| 1 | 0 | 1 | 0 | 0 | 1 | 93  | 7.5 | 105 |
| 1 | 0 | 1 | 0 | 0 | 1 | 94  | 7.5 | 105 |
| 1 | 0 | 1 | 0 | 0 | 1 | 95  | 7.5 | 105 |
| 1 | 0 | 1 | 0 | 0 | 1 | 96  | 7.5 | 105 |
| 1 | 0 | 1 | 0 | 0 | 1 | 97  | 7.5 | 105 |
| 1 | 0 | 1 | 0 | 0 | 1 | 98  | 7.5 | 105 |
| 1 | 0 | 1 | 0 | 0 | 1 | 99  | 7.5 | 105 |
| 1 | 0 | 1 | 0 | 0 | 1 | 100 | 7.5 | 105 |
| 1 | 0 | 1 | 0 | 0 | 1 | 101 | 7.5 | 105 |
| 1 | 0 | 1 | 0 | 0 | 1 | 102 | 7.5 | 105 |
| 1 | 0 | 1 | 0 | 0 | 1 | 103 | 7.5 | 105 |
| 1 | 0 | 1 | 0 | 0 | 1 | 104 | 7.5 | 105 |
| 1 | 0 | 1 | 0 | 0 | 1 | 105 | 7.5 | 105 |
| 1 | 0 | 1 | 0 | 0 | 1 | 106 | 7.5 | 105 |
| 1 | 0 | 1 | 0 | 0 | 1 | 107 | 7.5 | 105 |
| 1 | 0 | 1 | 0 | 0 | 1 | 108 | 7.5 | 105 |
| 1 | 0 | 1 | 0 | 0 | 1 | 109 | 7.5 | 105 |
| 1 | 0 | 1 | 0 | 0 | 1 | 110 | 7.5 | 105 |
| 1 | 0 | 1 | 0 | 0 | 1 | 111 | 7.5 | 105 |
| 1 | 0 | 1 | 0 | 0 | 1 | 112 | 7.5 | 105 |
| 1 | 0 | 1 | 0 | 0 | 1 | 113 | 7.5 | 105 |
| 1 | 0 | 1 | 0 | 0 | 1 | 114 | 7.5 | 105 |
| 1 | 0 | 1 | 0 | 0 | 1 | 115 | 7.5 | 105 |
| 1 | 0 | 1 | 0 | 0 | 1 | 116 | 7.5 | 105 |
| 1 | 0 | 1 | 0 | 0 | 1 | 117 | 7.5 | 105 |
| 1 | 0 | 1 | 0 | 0 | 1 | 118 | 7.5 | 105 |
| 1 | 0 | 1 | 0 | 0 | 1 | 119 | 7.5 | 105 |
| 1 | 0 | 1 | 0 | 0 | 1 | 120 | 7.5 | 120 |
| 1 | 0 | 1 | 0 | 0 | 1 | 121 | 7.5 | 135 |
| 1 | 0 | 1 | 0 | 0 | 1 | 122 | 7.5 | 135 |
| 1 | 0 | 1 | 0 | 0 | 1 | 123 | 7.5 | 135 |
| 1 | 0 | 1 | 0 | 0 | 1 | 124 | 7.5 | 135 |
| 1 | 0 | 1 | 0 | 0 | 1 | 125 | 7.5 | 135 |
| 1 | 0 | 1 | 0 | 0 | 1 | 126 | 7.5 | 135 |
| 1 | 0 | 1 | 0 | 0 | 1 | 127 | 7.5 | 135 |
| 1 | 0 | 1 | 0 | 0 | 1 | 128 | 7.5 | 135 |
| 1 | 0 | 1 | 0 | 0 | 1 | 129 | 7.5 | 135 |
| 1 | 0 | 1 | 0 | 0 | 1 | 130 | 7.5 | 135 |
| 1 | 0 | 1 | 0 | 0 | 1 | 131 | 7.5 | 135 |
| 1 | 0 | 1 | 0 | 0 | 1 | 132 | 7.5 | 135 |
| 1 | 0 | 1 | 0 | 0 | 1 | 133 | 7.5 | 135 |
| 1 | 0 | 1 | 0 | 0 | 1 | 134 | 7.5 | 135 |
| 1 | 0 | 1 | 0 | 0 | 1 | 135 | 7.5 | 135 |
| 1 | 0 | 1 | 0 | 0 | 1 | 136 | 7.5 | 135 |

|   |   |   |   |   |   |     |     |     |
|---|---|---|---|---|---|-----|-----|-----|
| 1 | 0 | 1 | 0 | 0 | 1 | 137 | 7.5 | 135 |
| 1 | 0 | 1 | 0 | 0 | 1 | 138 | 7.5 | 135 |
| 1 | 0 | 1 | 0 | 0 | 1 | 139 | 7.5 | 135 |
| 1 | 0 | 1 | 0 | 0 | 1 | 140 | 7.5 | 135 |
| 1 | 0 | 1 | 0 | 0 | 1 | 141 | 7.5 | 135 |
| 1 | 0 | 1 | 0 | 0 | 1 | 142 | 7.5 | 135 |
| 1 | 0 | 1 | 0 | 0 | 1 | 143 | 7.5 | 135 |
| 1 | 0 | 1 | 0 | 0 | 1 | 144 | 7.5 | 135 |
| 1 | 0 | 1 | 0 | 0 | 1 | 145 | 7.5 | 135 |
| 1 | 0 | 1 | 0 | 0 | 1 | 146 | 7.5 | 135 |
| 1 | 0 | 1 | 0 | 0 | 1 | 147 | 7.5 | 135 |
| 1 | 0 | 1 | 0 | 0 | 1 | 148 | 7.5 | 135 |
| 1 | 0 | 1 | 0 | 0 | 1 | 149 | 7.5 | 135 |
| 1 | 0 | 1 | 0 | 0 | 1 | 150 | 7.5 | 135 |
| 1 | 0 | 1 | 0 | 0 | 1 | 151 | 7.5 | 135 |
| 1 | 0 | 1 | 0 | 0 | 1 | 152 | 7.5 | 135 |
| 1 | 0 | 1 | 0 | 0 | 1 | 153 | 7.5 | 135 |
| 1 | 0 | 1 | 0 | 0 | 1 | 154 | 7.5 | 135 |
| 1 | 0 | 1 | 0 | 0 | 1 | 155 | 7.5 | 135 |
| 1 | 0 | 1 | 0 | 0 | 1 | 156 | 7.5 | 135 |
| 1 | 0 | 1 | 0 | 0 | 1 | 157 | 7.5 | 135 |
| 1 | 0 | 1 | 0 | 0 | 1 | 158 | 7.5 | 135 |
| 1 | 0 | 1 | 0 | 0 | 1 | 159 | 7.5 | 135 |
| 1 | 0 | 1 | 0 | 0 | 1 | 160 | 7.5 | 135 |
| 1 | 0 | 1 | 0 | 0 | 1 | 161 | 7.5 | 135 |
| 1 | 0 | 1 | 0 | 0 | 1 | 162 | 7.5 | 135 |
| 1 | 0 | 1 | 0 | 0 | 1 | 163 | 7.5 | 135 |
| 1 | 0 | 1 | 0 | 0 | 1 | 164 | 7.5 | 135 |
| 1 | 0 | 1 | 0 | 0 | 1 | 165 | 7.5 | 135 |
| 1 | 0 | 1 | 0 | 0 | 1 | 166 | 7.5 | 135 |
| 1 | 0 | 1 | 0 | 0 | 1 | 167 | 7.5 | 135 |
| 1 | 0 | 1 | 0 | 0 | 1 | 168 | 7.5 | 135 |
| 1 | 0 | 1 | 0 | 0 | 1 | 169 | 7.5 | 135 |
| 1 | 0 | 1 | 0 | 0 | 1 | 170 | 7.5 | 135 |
| 1 | 0 | 1 | 0 | 0 | 1 | 171 | 7.5 | 135 |
| 1 | 0 | 1 | 0 | 0 | 1 | 172 | 7.5 | 135 |
| 1 | 0 | 1 | 0 | 0 | 1 | 173 | 7.5 | 135 |
| 1 | 0 | 1 | 0 | 0 | 1 | 174 | 7.5 | 135 |
| 1 | 0 | 1 | 0 | 0 | 1 | 175 | 7.5 | 135 |
| 1 | 0 | 1 | 0 | 0 | 1 | 176 | 7.5 | 135 |
| 1 | 0 | 1 | 0 | 0 | 1 | 177 | 7.5 | 135 |
| 1 | 0 | 1 | 0 | 0 | 1 | 178 | 7.5 | 135 |
| 1 | 0 | 1 | 0 | 0 | 1 | 179 | 7.5 | 135 |
| 1 | 0 | 1 | 0 | 0 | 1 | 180 | 7.5 | 135 |
| 1 | 0 | 0 | 1 | 1 | 0 | 0   | 7.5 | 45  |
| 1 | 0 | 0 | 1 | 1 | 0 | 1   | 7.5 | 45  |

|   |   |   |   |   |   |    |     |    |
|---|---|---|---|---|---|----|-----|----|
| 1 | 0 | 0 | 1 | 1 | 0 | 2  | 7.5 | 45 |
| 1 | 0 | 0 | 1 | 1 | 0 | 3  | 7.5 | 45 |
| 1 | 0 | 0 | 1 | 1 | 0 | 4  | 7.5 | 45 |
| 1 | 0 | 0 | 1 | 1 | 0 | 5  | 7.5 | 45 |
| 1 | 0 | 0 | 1 | 1 | 0 | 6  | 7.5 | 45 |
| 1 | 0 | 0 | 1 | 1 | 0 | 7  | 7.5 | 45 |
| 1 | 0 | 0 | 1 | 1 | 0 | 8  | 7.5 | 45 |
| 1 | 0 | 0 | 1 | 1 | 0 | 9  | 7.5 | 45 |
| 1 | 0 | 0 | 1 | 1 | 0 | 10 | 7.5 | 45 |
| 1 | 0 | 0 | 1 | 1 | 0 | 11 | 7.5 | 45 |
| 1 | 0 | 0 | 1 | 1 | 0 | 12 | 7.5 | 45 |
| 1 | 0 | 0 | 1 | 1 | 0 | 13 | 7.5 | 45 |
| 1 | 0 | 0 | 1 | 1 | 0 | 14 | 7.5 | 45 |
| 1 | 0 | 0 | 1 | 1 | 0 | 15 | 7.5 | 45 |
| 1 | 0 | 0 | 1 | 1 | 0 | 16 | 7.5 | 45 |
| 1 | 0 | 0 | 1 | 1 | 0 | 17 | 7.5 | 45 |
| 1 | 0 | 0 | 1 | 1 | 0 | 18 | 7.5 | 45 |
| 1 | 0 | 0 | 1 | 1 | 0 | 19 | 7.5 | 45 |
| 1 | 0 | 0 | 1 | 1 | 0 | 20 | 7.5 | 45 |
| 1 | 0 | 0 | 1 | 1 | 0 | 21 | 7.5 | 45 |
| 1 | 0 | 0 | 1 | 1 | 0 | 22 | 7.5 | 45 |
| 1 | 0 | 0 | 1 | 1 | 0 | 23 | 7.5 | 45 |
| 1 | 0 | 0 | 1 | 1 | 0 | 24 | 7.5 | 45 |
| 1 | 0 | 0 | 1 | 1 | 0 | 25 | 7.5 | 45 |
| 1 | 0 | 0 | 1 | 1 | 0 | 26 | 7.5 | 45 |
| 1 | 0 | 0 | 1 | 1 | 0 | 27 | 7.5 | 45 |
| 1 | 0 | 0 | 1 | 1 | 0 | 28 | 7.5 | 45 |
| 1 | 0 | 0 | 1 | 1 | 0 | 29 | 7.5 | 45 |
| 1 | 0 | 0 | 1 | 1 | 0 | 30 | 7.5 | 45 |
| 1 | 0 | 0 | 1 | 1 | 0 | 31 | 7.5 | 45 |
| 1 | 0 | 0 | 1 | 1 | 0 | 32 | 7.5 | 45 |
| 1 | 0 | 0 | 1 | 1 | 0 | 33 | 7.5 | 45 |
| 1 | 0 | 0 | 1 | 1 | 0 | 34 | 7.5 | 45 |
| 1 | 0 | 0 | 1 | 1 | 0 | 35 | 7.5 | 45 |
| 1 | 0 | 0 | 1 | 1 | 0 | 36 | 7.5 | 45 |
| 1 | 0 | 0 | 1 | 1 | 0 | 37 | 7.5 | 45 |
| 1 | 0 | 0 | 1 | 1 | 0 | 38 | 7.5 | 45 |
| 1 | 0 | 0 | 1 | 1 | 0 | 39 | 7.5 | 45 |
| 1 | 0 | 0 | 1 | 1 | 0 | 40 | 7.5 | 45 |
| 1 | 0 | 0 | 1 | 1 | 0 | 41 | 7.5 | 45 |
| 1 | 0 | 0 | 1 | 1 | 0 | 42 | 7.5 | 45 |
| 1 | 0 | 0 | 1 | 1 | 0 | 43 | 7.5 | 45 |
| 1 | 0 | 0 | 1 | 1 | 0 | 44 | 7.5 | 45 |
| 1 | 0 | 0 | 1 | 1 | 0 | 45 | 7.5 | 45 |
| 1 | 0 | 0 | 1 | 1 | 0 | 46 | 7.5 | 45 |
| 1 | 0 | 0 | 1 | 1 | 0 | 47 | 7.5 | 45 |

|   |   |   |   |   |   |    |     |    |
|---|---|---|---|---|---|----|-----|----|
| 1 | 0 | 0 | 1 | 1 | 0 | 48 | 7.5 | 45 |
| 1 | 0 | 0 | 1 | 1 | 0 | 49 | 7.5 | 45 |
| 1 | 0 | 0 | 1 | 1 | 0 | 50 | 7.5 | 45 |
| 1 | 0 | 0 | 1 | 1 | 0 | 51 | 7.5 | 45 |
| 1 | 0 | 0 | 1 | 1 | 0 | 52 | 7.5 | 45 |
| 1 | 0 | 0 | 1 | 1 | 0 | 53 | 7.5 | 45 |
| 1 | 0 | 0 | 1 | 1 | 0 | 54 | 7.5 | 45 |
| 1 | 0 | 0 | 1 | 1 | 0 | 55 | 7.5 | 45 |
| 1 | 0 | 0 | 1 | 1 | 0 | 56 | 7.5 | 45 |
| 1 | 0 | 0 | 1 | 1 | 0 | 57 | 7.5 | 45 |
| 1 | 0 | 0 | 1 | 1 | 0 | 58 | 7.5 | 45 |
| 1 | 0 | 0 | 1 | 1 | 0 | 59 | 7.5 | 45 |
| 1 | 0 | 0 | 1 | 1 | 0 | 60 | 7.5 | 60 |
| 1 | 0 | 0 | 1 | 1 | 0 | 61 | 7.5 | 75 |
| 1 | 0 | 0 | 1 | 1 | 0 | 62 | 7.5 | 75 |
| 1 | 0 | 0 | 1 | 1 | 0 | 63 | 7.5 | 75 |
| 1 | 0 | 0 | 1 | 1 | 0 | 64 | 7.5 | 75 |
| 1 | 0 | 0 | 1 | 1 | 0 | 65 | 7.5 | 75 |
| 1 | 0 | 0 | 1 | 1 | 0 | 66 | 7.5 | 75 |
| 1 | 0 | 0 | 1 | 1 | 0 | 67 | 7.5 | 75 |
| 1 | 0 | 0 | 1 | 1 | 0 | 68 | 7.5 | 75 |
| 1 | 0 | 0 | 1 | 1 | 0 | 69 | 7.5 | 75 |
| 1 | 0 | 0 | 1 | 1 | 0 | 70 | 7.5 | 75 |
| 1 | 0 | 0 | 1 | 1 | 0 | 71 | 7.5 | 75 |
| 1 | 0 | 0 | 1 | 1 | 0 | 72 | 7.5 | 75 |
| 1 | 0 | 0 | 1 | 1 | 0 | 73 | 7.5 | 75 |
| 1 | 0 | 0 | 1 | 1 | 0 | 74 | 7.5 | 75 |
| 1 | 0 | 0 | 1 | 1 | 0 | 75 | 7.5 | 75 |
| 1 | 0 | 0 | 1 | 1 | 0 | 76 | 7.5 | 75 |
| 1 | 0 | 0 | 1 | 1 | 0 | 77 | 7.5 | 75 |
| 1 | 0 | 0 | 1 | 1 | 0 | 78 | 7.5 | 75 |
| 1 | 0 | 0 | 1 | 1 | 0 | 79 | 7.5 | 75 |
| 1 | 0 | 0 | 1 | 1 | 0 | 80 | 7.5 | 75 |
| 1 | 0 | 0 | 1 | 1 | 0 | 81 | 7.5 | 75 |
| 1 | 0 | 0 | 1 | 1 | 0 | 82 | 7.5 | 75 |
| 1 | 0 | 0 | 1 | 1 | 0 | 83 | 7.5 | 75 |
| 1 | 0 | 0 | 1 | 1 | 0 | 84 | 7.5 | 75 |
| 1 | 0 | 0 | 1 | 1 | 0 | 85 | 7.5 | 75 |
| 1 | 0 | 0 | 1 | 1 | 0 | 86 | 7.5 | 75 |
| 1 | 0 | 0 | 1 | 1 | 0 | 87 | 7.5 | 75 |
| 1 | 0 | 0 | 1 | 1 | 0 | 88 | 7.5 | 75 |
| 1 | 0 | 0 | 1 | 1 | 0 | 89 | 7.5 | 75 |
| 1 | 0 | 0 | 1 | 1 | 0 | 90 | 7.5 | 75 |
| 1 | 0 | 0 | 1 | 1 | 0 | 91 | 7.5 | 75 |
| 1 | 0 | 0 | 1 | 1 | 0 | 92 | 7.5 | 75 |
| 1 | 0 | 0 | 1 | 1 | 0 | 93 | 7.5 | 75 |

|   |   |   |   |   |   |     |     |     |
|---|---|---|---|---|---|-----|-----|-----|
| 1 | 0 | 0 | 1 | 1 | 0 | 94  | 7.5 | 75  |
| 1 | 0 | 0 | 1 | 1 | 0 | 95  | 7.5 | 75  |
| 1 | 0 | 0 | 1 | 1 | 0 | 96  | 7.5 | 75  |
| 1 | 0 | 0 | 1 | 1 | 0 | 97  | 7.5 | 75  |
| 1 | 0 | 0 | 1 | 1 | 0 | 98  | 7.5 | 75  |
| 1 | 0 | 0 | 1 | 1 | 0 | 99  | 7.5 | 75  |
| 1 | 0 | 0 | 1 | 1 | 0 | 100 | 7.5 | 75  |
| 1 | 0 | 0 | 1 | 1 | 0 | 101 | 7.5 | 75  |
| 1 | 0 | 0 | 1 | 1 | 0 | 102 | 7.5 | 75  |
| 1 | 0 | 0 | 1 | 1 | 0 | 103 | 7.5 | 75  |
| 1 | 0 | 0 | 1 | 1 | 0 | 104 | 7.5 | 75  |
| 1 | 0 | 0 | 1 | 1 | 0 | 105 | 7.5 | 75  |
| 1 | 0 | 0 | 1 | 1 | 0 | 106 | 7.5 | 75  |
| 1 | 0 | 0 | 1 | 1 | 0 | 107 | 7.5 | 75  |
| 1 | 0 | 0 | 1 | 1 | 0 | 108 | 7.5 | 75  |
| 1 | 0 | 0 | 1 | 1 | 0 | 109 | 7.5 | 75  |
| 1 | 0 | 0 | 1 | 1 | 0 | 110 | 7.5 | 75  |
| 1 | 0 | 0 | 1 | 1 | 0 | 111 | 7.5 | 75  |
| 1 | 0 | 0 | 1 | 1 | 0 | 112 | 7.5 | 75  |
| 1 | 0 | 0 | 1 | 1 | 0 | 113 | 7.5 | 75  |
| 1 | 0 | 0 | 1 | 1 | 0 | 114 | 7.5 | 75  |
| 1 | 0 | 0 | 1 | 1 | 0 | 115 | 7.5 | 75  |
| 1 | 0 | 0 | 1 | 1 | 0 | 116 | 7.5 | 75  |
| 1 | 0 | 0 | 1 | 1 | 0 | 117 | 7.5 | 75  |
| 1 | 0 | 0 | 1 | 1 | 0 | 118 | 7.5 | 75  |
| 1 | 0 | 0 | 1 | 1 | 0 | 119 | 7.5 | 75  |
| 1 | 0 | 0 | 1 | 1 | 0 | 120 | 7.5 | 165 |
| 1 | 0 | 0 | 1 | 1 | 0 | 121 | 7.5 | 165 |
| 1 | 0 | 0 | 1 | 1 | 0 | 122 | 7.5 | 165 |
| 1 | 0 | 0 | 1 | 1 | 0 | 123 | 7.5 | 165 |
| 1 | 0 | 0 | 1 | 1 | 0 | 124 | 7.5 | 165 |
| 1 | 0 | 0 | 1 | 1 | 0 | 125 | 7.5 | 165 |
| 1 | 0 | 0 | 1 | 1 | 0 | 126 | 7.5 | 165 |
| 1 | 0 | 0 | 1 | 1 | 0 | 127 | 7.5 | 165 |
| 1 | 0 | 0 | 1 | 1 | 0 | 128 | 7.5 | 165 |
| 1 | 0 | 0 | 1 | 1 | 0 | 129 | 7.5 | 165 |
| 1 | 0 | 0 | 1 | 1 | 0 | 130 | 7.5 | 165 |
| 1 | 0 | 0 | 1 | 1 | 0 | 131 | 7.5 | 165 |
| 1 | 0 | 0 | 1 | 1 | 0 | 132 | 7.5 | 165 |
| 1 | 0 | 0 | 1 | 1 | 0 | 133 | 7.5 | 165 |
| 1 | 0 | 0 | 1 | 1 | 0 | 134 | 7.5 | 165 |
| 1 | 0 | 0 | 1 | 1 | 0 | 135 | 7.5 | 165 |
| 1 | 0 | 0 | 1 | 1 | 0 | 136 | 7.5 | 165 |
| 1 | 0 | 0 | 1 | 1 | 0 | 137 | 7.5 | 165 |
| 1 | 0 | 0 | 1 | 1 | 0 | 138 | 7.5 | 165 |
| 1 | 0 | 0 | 1 | 1 | 0 | 139 | 7.5 | 165 |

|   |   |   |   |   |   |     |     |     |
|---|---|---|---|---|---|-----|-----|-----|
| 1 | 0 | 0 | 1 | 1 | 0 | 140 | 7.5 | 165 |
| 1 | 0 | 0 | 1 | 1 | 0 | 141 | 7.5 | 165 |
| 1 | 0 | 0 | 1 | 1 | 0 | 142 | 7.5 | 165 |
| 1 | 0 | 0 | 1 | 1 | 0 | 143 | 7.5 | 165 |
| 1 | 0 | 0 | 1 | 1 | 0 | 144 | 7.5 | 165 |
| 1 | 0 | 0 | 1 | 1 | 0 | 145 | 7.5 | 165 |
| 1 | 0 | 0 | 1 | 1 | 0 | 146 | 7.5 | 165 |
| 1 | 0 | 0 | 1 | 1 | 0 | 147 | 7.5 | 165 |
| 1 | 0 | 0 | 1 | 1 | 0 | 148 | 7.5 | 165 |
| 1 | 0 | 0 | 1 | 1 | 0 | 149 | 7.5 | 165 |
| 1 | 0 | 0 | 1 | 1 | 0 | 150 | 7.5 | 165 |
| 1 | 0 | 0 | 1 | 1 | 0 | 151 | 7.5 | 165 |
| 1 | 0 | 0 | 1 | 1 | 0 | 152 | 7.5 | 165 |
| 1 | 0 | 0 | 1 | 1 | 0 | 153 | 7.5 | 165 |
| 1 | 0 | 0 | 1 | 1 | 0 | 154 | 7.5 | 165 |
| 1 | 0 | 0 | 1 | 1 | 0 | 155 | 7.5 | 165 |
| 1 | 0 | 0 | 1 | 1 | 0 | 156 | 7.5 | 165 |
| 1 | 0 | 0 | 1 | 1 | 0 | 157 | 7.5 | 165 |
| 1 | 0 | 0 | 1 | 1 | 0 | 158 | 7.5 | 165 |
| 1 | 0 | 0 | 1 | 1 | 0 | 159 | 7.5 | 165 |
| 1 | 0 | 0 | 1 | 1 | 0 | 160 | 7.5 | 165 |
| 1 | 0 | 0 | 1 | 1 | 0 | 161 | 7.5 | 165 |
| 1 | 0 | 0 | 1 | 1 | 0 | 162 | 7.5 | 165 |
| 1 | 0 | 0 | 1 | 1 | 0 | 163 | 7.5 | 165 |
| 1 | 0 | 0 | 1 | 1 | 0 | 164 | 7.5 | 165 |
| 1 | 0 | 0 | 1 | 1 | 0 | 165 | 7.5 | 165 |
| 1 | 0 | 0 | 1 | 1 | 0 | 166 | 7.5 | 165 |
| 1 | 0 | 0 | 1 | 1 | 0 | 167 | 7.5 | 165 |
| 1 | 0 | 0 | 1 | 1 | 0 | 168 | 7.5 | 165 |
| 1 | 0 | 0 | 1 | 1 | 0 | 169 | 7.5 | 165 |
| 1 | 0 | 0 | 1 | 1 | 0 | 170 | 7.5 | 165 |
| 1 | 0 | 0 | 1 | 1 | 0 | 171 | 7.5 | 165 |
| 1 | 0 | 0 | 1 | 1 | 0 | 172 | 7.5 | 165 |
| 1 | 0 | 0 | 1 | 1 | 0 | 173 | 7.5 | 165 |
| 1 | 0 | 0 | 1 | 1 | 0 | 174 | 7.5 | 165 |
| 1 | 0 | 0 | 1 | 1 | 0 | 175 | 7.5 | 165 |
| 1 | 0 | 0 | 1 | 1 | 0 | 176 | 7.5 | 165 |
| 1 | 0 | 0 | 1 | 1 | 0 | 177 | 7.5 | 165 |
| 1 | 0 | 0 | 1 | 1 | 0 | 178 | 7.5 | 165 |
| 1 | 0 | 0 | 1 | 1 | 0 | 179 | 7.5 | 165 |
| 1 | 0 | 0 | 1 | 1 | 0 | 180 | 7.5 | 180 |
| 1 | 0 | 0 | 1 | 0 | 1 | 0   | 7.5 | 45  |
| 1 | 0 | 0 | 1 | 0 | 1 | 1   | 7.5 | 45  |
| 1 | 0 | 0 | 1 | 0 | 1 | 2   | 7.5 | 45  |
| 1 | 0 | 0 | 1 | 0 | 1 | 3   | 7.5 | 45  |
| 1 | 0 | 0 | 1 | 0 | 1 | 4   | 7.5 | 45  |

|   |   |   |   |   |   |    |     |    |
|---|---|---|---|---|---|----|-----|----|
| 1 | 0 | 0 | 1 | 0 | 1 | 5  | 7.5 | 45 |
| 1 | 0 | 0 | 1 | 0 | 1 | 6  | 7.5 | 45 |
| 1 | 0 | 0 | 1 | 0 | 1 | 7  | 7.5 | 45 |
| 1 | 0 | 0 | 1 | 0 | 1 | 8  | 7.5 | 45 |
| 1 | 0 | 0 | 1 | 0 | 1 | 9  | 7.5 | 45 |
| 1 | 0 | 0 | 1 | 0 | 1 | 10 | 7.5 | 45 |
| 1 | 0 | 0 | 1 | 0 | 1 | 11 | 7.5 | 45 |
| 1 | 0 | 0 | 1 | 0 | 1 | 12 | 7.5 | 45 |
| 1 | 0 | 0 | 1 | 0 | 1 | 13 | 7.5 | 45 |
| 1 | 0 | 0 | 1 | 0 | 1 | 14 | 7.5 | 45 |
| 1 | 0 | 0 | 1 | 0 | 1 | 15 | 7.5 | 45 |
| 1 | 0 | 0 | 1 | 0 | 1 | 16 | 7.5 | 45 |
| 1 | 0 | 0 | 1 | 0 | 1 | 17 | 7.5 | 45 |
| 1 | 0 | 0 | 1 | 0 | 1 | 18 | 7.5 | 45 |
| 1 | 0 | 0 | 1 | 0 | 1 | 19 | 7.5 | 45 |
| 1 | 0 | 0 | 1 | 0 | 1 | 20 | 7.5 | 45 |
| 1 | 0 | 0 | 1 | 0 | 1 | 21 | 7.5 | 45 |
| 1 | 0 | 0 | 1 | 0 | 1 | 22 | 7.5 | 45 |
| 1 | 0 | 0 | 1 | 0 | 1 | 23 | 7.5 | 45 |
| 1 | 0 | 0 | 1 | 0 | 1 | 24 | 7.5 | 45 |
| 1 | 0 | 0 | 1 | 0 | 1 | 25 | 7.5 | 45 |
| 1 | 0 | 0 | 1 | 0 | 1 | 26 | 7.5 | 45 |
| 1 | 0 | 0 | 1 | 0 | 1 | 27 | 7.5 | 45 |
| 1 | 0 | 0 | 1 | 0 | 1 | 28 | 7.5 | 45 |
| 1 | 0 | 0 | 1 | 0 | 1 | 29 | 7.5 | 45 |
| 1 | 0 | 0 | 1 | 0 | 1 | 30 | 7.5 | 45 |
| 1 | 0 | 0 | 1 | 0 | 1 | 31 | 7.5 | 45 |
| 1 | 0 | 0 | 1 | 0 | 1 | 32 | 7.5 | 45 |
| 1 | 0 | 0 | 1 | 0 | 1 | 33 | 7.5 | 45 |
| 1 | 0 | 0 | 1 | 0 | 1 | 34 | 7.5 | 45 |
| 1 | 0 | 0 | 1 | 0 | 1 | 35 | 7.5 | 45 |
| 1 | 0 | 0 | 1 | 0 | 1 | 36 | 7.5 | 45 |
| 1 | 0 | 0 | 1 | 0 | 1 | 37 | 7.5 | 45 |
| 1 | 0 | 0 | 1 | 0 | 1 | 38 | 7.5 | 45 |
| 1 | 0 | 0 | 1 | 0 | 1 | 39 | 7.5 | 45 |
| 1 | 0 | 0 | 1 | 0 | 1 | 40 | 7.5 | 45 |
| 1 | 0 | 0 | 1 | 0 | 1 | 41 | 7.5 | 45 |
| 1 | 0 | 0 | 1 | 0 | 1 | 42 | 7.5 | 45 |
| 1 | 0 | 0 | 1 | 0 | 1 | 43 | 7.5 | 45 |
| 1 | 0 | 0 | 1 | 0 | 1 | 44 | 7.5 | 45 |
| 1 | 0 | 0 | 1 | 0 | 1 | 45 | 7.5 | 45 |
| 1 | 0 | 0 | 1 | 0 | 1 | 46 | 7.5 | 45 |
| 1 | 0 | 0 | 1 | 0 | 1 | 47 | 7.5 | 45 |
| 1 | 0 | 0 | 1 | 0 | 1 | 48 | 7.5 | 45 |
| 1 | 0 | 0 | 1 | 0 | 1 | 49 | 7.5 | 45 |
| 1 | 0 | 0 | 1 | 0 | 1 | 50 | 7.5 | 45 |

|   |   |   |   |   |   |    |     |    |
|---|---|---|---|---|---|----|-----|----|
| 1 | 0 | 0 | 1 | 0 | 1 | 51 | 7.5 | 45 |
| 1 | 0 | 0 | 1 | 0 | 1 | 52 | 7.5 | 45 |
| 1 | 0 | 0 | 1 | 0 | 1 | 53 | 7.5 | 45 |
| 1 | 0 | 0 | 1 | 0 | 1 | 54 | 7.5 | 45 |
| 1 | 0 | 0 | 1 | 0 | 1 | 55 | 7.5 | 45 |
| 1 | 0 | 0 | 1 | 0 | 1 | 56 | 7.5 | 45 |
| 1 | 0 | 0 | 1 | 0 | 1 | 57 | 7.5 | 45 |
| 1 | 0 | 0 | 1 | 0 | 1 | 58 | 7.5 | 45 |
| 1 | 0 | 0 | 1 | 0 | 1 | 59 | 7.5 | 45 |
| 1 | 0 | 0 | 1 | 0 | 1 | 60 | 7.5 | 60 |
| 1 | 0 | 0 | 1 | 0 | 1 | 61 | 7.5 | 75 |
| 1 | 0 | 0 | 1 | 0 | 1 | 62 | 7.5 | 75 |
| 1 | 0 | 0 | 1 | 0 | 1 | 63 | 7.5 | 75 |
| 1 | 0 | 0 | 1 | 0 | 1 | 64 | 7.5 | 75 |
| 1 | 0 | 0 | 1 | 0 | 1 | 65 | 7.5 | 75 |
| 1 | 0 | 0 | 1 | 0 | 1 | 66 | 7.5 | 75 |
| 1 | 0 | 0 | 1 | 0 | 1 | 67 | 7.5 | 75 |
| 1 | 0 | 0 | 1 | 0 | 1 | 68 | 7.5 | 75 |
| 1 | 0 | 0 | 1 | 0 | 1 | 69 | 7.5 | 75 |
| 1 | 0 | 0 | 1 | 0 | 1 | 70 | 7.5 | 75 |
| 1 | 0 | 0 | 1 | 0 | 1 | 71 | 7.5 | 75 |
| 1 | 0 | 0 | 1 | 0 | 1 | 72 | 7.5 | 75 |
| 1 | 0 | 0 | 1 | 0 | 1 | 73 | 7.5 | 75 |
| 1 | 0 | 0 | 1 | 0 | 1 | 74 | 7.5 | 75 |
| 1 | 0 | 0 | 1 | 0 | 1 | 75 | 7.5 | 75 |
| 1 | 0 | 0 | 1 | 0 | 1 | 76 | 7.5 | 75 |
| 1 | 0 | 0 | 1 | 0 | 1 | 77 | 7.5 | 75 |
| 1 | 0 | 0 | 1 | 0 | 1 | 78 | 7.5 | 75 |
| 1 | 0 | 0 | 1 | 0 | 1 | 79 | 7.5 | 75 |
| 1 | 0 | 0 | 1 | 0 | 1 | 80 | 7.5 | 75 |
| 1 | 0 | 0 | 1 | 0 | 1 | 81 | 7.5 | 75 |
| 1 | 0 | 0 | 1 | 0 | 1 | 82 | 7.5 | 75 |
| 1 | 0 | 0 | 1 | 0 | 1 | 83 | 7.5 | 75 |
| 1 | 0 | 0 | 1 | 0 | 1 | 84 | 7.5 | 75 |
| 1 | 0 | 0 | 1 | 0 | 1 | 85 | 7.5 | 75 |
| 1 | 0 | 0 | 1 | 0 | 1 | 86 | 7.5 | 75 |
| 1 | 0 | 0 | 1 | 0 | 1 | 87 | 7.5 | 75 |
| 1 | 0 | 0 | 1 | 0 | 1 | 88 | 7.5 | 75 |
| 1 | 0 | 0 | 1 | 0 | 1 | 89 | 7.5 | 75 |
| 1 | 0 | 0 | 1 | 0 | 1 | 90 | 7.5 | 75 |
| 1 | 0 | 0 | 1 | 0 | 1 | 91 | 7.5 | 75 |
| 1 | 0 | 0 | 1 | 0 | 1 | 92 | 7.5 | 75 |
| 1 | 0 | 0 | 1 | 0 | 1 | 93 | 7.5 | 75 |
| 1 | 0 | 0 | 1 | 0 | 1 | 94 | 7.5 | 75 |
| 1 | 0 | 0 | 1 | 0 | 1 | 95 | 7.5 | 75 |
| 1 | 0 | 0 | 1 | 0 | 1 | 96 | 7.5 | 75 |

|   |   |   |   |   |   |     |     |     |
|---|---|---|---|---|---|-----|-----|-----|
| 1 | 0 | 0 | 1 | 0 | 1 | 97  | 7.5 | 75  |
| 1 | 0 | 0 | 1 | 0 | 1 | 98  | 7.5 | 75  |
| 1 | 0 | 0 | 1 | 0 | 1 | 99  | 7.5 | 75  |
| 1 | 0 | 0 | 1 | 0 | 1 | 100 | 7.5 | 75  |
| 1 | 0 | 0 | 1 | 0 | 1 | 101 | 7.5 | 75  |
| 1 | 0 | 0 | 1 | 0 | 1 | 102 | 7.5 | 75  |
| 1 | 0 | 0 | 1 | 0 | 1 | 103 | 7.5 | 75  |
| 1 | 0 | 0 | 1 | 0 | 1 | 104 | 7.5 | 75  |
| 1 | 0 | 0 | 1 | 0 | 1 | 105 | 7.5 | 75  |
| 1 | 0 | 0 | 1 | 0 | 1 | 106 | 7.5 | 135 |
| 1 | 0 | 0 | 1 | 0 | 1 | 107 | 7.5 | 135 |
| 1 | 0 | 0 | 1 | 0 | 1 | 108 | 7.5 | 135 |
| 1 | 0 | 0 | 1 | 0 | 1 | 109 | 7.5 | 135 |
| 1 | 0 | 0 | 1 | 0 | 1 | 110 | 7.5 | 135 |
| 1 | 0 | 0 | 1 | 0 | 1 | 111 | 7.5 | 135 |
| 1 | 0 | 0 | 1 | 0 | 1 | 112 | 7.5 | 135 |
| 1 | 0 | 0 | 1 | 0 | 1 | 113 | 7.5 | 135 |
| 1 | 0 | 0 | 1 | 0 | 1 | 114 | 7.5 | 135 |
| 1 | 0 | 0 | 1 | 0 | 1 | 115 | 7.5 | 135 |
| 1 | 0 | 0 | 1 | 0 | 1 | 116 | 7.5 | 135 |
| 1 | 0 | 0 | 1 | 0 | 1 | 117 | 7.5 | 135 |
| 1 | 0 | 0 | 1 | 0 | 1 | 118 | 7.5 | 135 |
| 1 | 0 | 0 | 1 | 0 | 1 | 119 | 7.5 | 135 |
| 1 | 0 | 0 | 1 | 0 | 1 | 120 | 7.5 | 135 |
| 1 | 0 | 0 | 1 | 0 | 1 | 121 | 7.5 | 135 |
| 1 | 0 | 0 | 1 | 0 | 1 | 122 | 7.5 | 135 |
| 1 | 0 | 0 | 1 | 0 | 1 | 123 | 7.5 | 135 |
| 1 | 0 | 0 | 1 | 0 | 1 | 124 | 7.5 | 135 |
| 1 | 0 | 0 | 1 | 0 | 1 | 125 | 7.5 | 135 |
| 1 | 0 | 0 | 1 | 0 | 1 | 126 | 7.5 | 135 |
| 1 | 0 | 0 | 1 | 0 | 1 | 127 | 7.5 | 135 |
| 1 | 0 | 0 | 1 | 0 | 1 | 128 | 7.5 | 135 |
| 1 | 0 | 0 | 1 | 0 | 1 | 129 | 7.5 | 135 |
| 1 | 0 | 0 | 1 | 0 | 1 | 130 | 7.5 | 135 |
| 1 | 0 | 0 | 1 | 0 | 1 | 131 | 7.5 | 135 |
| 1 | 0 | 0 | 1 | 0 | 1 | 132 | 7.5 | 135 |
| 1 | 0 | 0 | 1 | 0 | 1 | 133 | 7.5 | 135 |
| 1 | 0 | 0 | 1 | 0 | 1 | 134 | 7.5 | 135 |
| 1 | 0 | 0 | 1 | 0 | 1 | 135 | 7.5 | 135 |
| 1 | 0 | 0 | 1 | 0 | 1 | 136 | 7.5 | 135 |
| 1 | 0 | 0 | 1 | 0 | 1 | 137 | 7.5 | 135 |
| 1 | 0 | 0 | 1 | 0 | 1 | 138 | 7.5 | 135 |
| 1 | 0 | 0 | 1 | 0 | 1 | 139 | 7.5 | 135 |
| 1 | 0 | 0 | 1 | 0 | 1 | 140 | 7.5 | 135 |
| 1 | 0 | 0 | 1 | 0 | 1 | 141 | 7.5 | 135 |
| 1 | 0 | 0 | 1 | 0 | 1 | 142 | 7.5 | 135 |

|   |   |   |   |   |   |     |     |     |
|---|---|---|---|---|---|-----|-----|-----|
| 1 | 0 | 0 | 1 | 0 | 1 | 143 | 7.5 | 135 |
| 1 | 0 | 0 | 1 | 0 | 1 | 144 | 7.5 | 135 |
| 1 | 0 | 0 | 1 | 0 | 1 | 145 | 7.5 | 135 |
| 1 | 0 | 0 | 1 | 0 | 1 | 146 | 7.5 | 135 |
| 1 | 0 | 0 | 1 | 0 | 1 | 147 | 7.5 | 135 |
| 1 | 0 | 0 | 1 | 0 | 1 | 148 | 7.5 | 135 |
| 1 | 0 | 0 | 1 | 0 | 1 | 149 | 7.5 | 135 |
| 1 | 0 | 0 | 1 | 0 | 1 | 150 | 7.5 | 135 |
| 1 | 0 | 0 | 1 | 0 | 1 | 151 | 7.5 | 135 |
| 1 | 0 | 0 | 1 | 0 | 1 | 152 | 7.5 | 135 |
| 1 | 0 | 0 | 1 | 0 | 1 | 153 | 7.5 | 135 |
| 1 | 0 | 0 | 1 | 0 | 1 | 154 | 7.5 | 135 |
| 1 | 0 | 0 | 1 | 0 | 1 | 155 | 7.5 | 135 |
| 1 | 0 | 0 | 1 | 0 | 1 | 156 | 7.5 | 135 |
| 1 | 0 | 0 | 1 | 0 | 1 | 157 | 7.5 | 135 |
| 1 | 0 | 0 | 1 | 0 | 1 | 158 | 7.5 | 135 |
| 1 | 0 | 0 | 1 | 0 | 1 | 159 | 7.5 | 135 |
| 1 | 0 | 0 | 1 | 0 | 1 | 160 | 7.5 | 135 |
| 1 | 0 | 0 | 1 | 0 | 1 | 161 | 7.5 | 135 |
| 1 | 0 | 0 | 1 | 0 | 1 | 162 | 7.5 | 135 |
| 1 | 0 | 0 | 1 | 0 | 1 | 163 | 7.5 | 135 |
| 1 | 0 | 0 | 1 | 0 | 1 | 164 | 7.5 | 135 |
| 1 | 0 | 0 | 1 | 0 | 1 | 165 | 7.5 | 135 |
| 1 | 0 | 0 | 1 | 0 | 1 | 166 | 7.5 | 135 |
| 1 | 0 | 0 | 1 | 0 | 1 | 167 | 7.5 | 135 |
| 1 | 0 | 0 | 1 | 0 | 1 | 168 | 7.5 | 135 |
| 1 | 0 | 0 | 1 | 0 | 1 | 169 | 7.5 | 135 |
| 1 | 0 | 0 | 1 | 0 | 1 | 170 | 7.5 | 135 |
| 1 | 0 | 0 | 1 | 0 | 1 | 171 | 7.5 | 135 |
| 1 | 0 | 0 | 1 | 0 | 1 | 172 | 7.5 | 135 |
| 1 | 0 | 0 | 1 | 0 | 1 | 173 | 7.5 | 135 |
| 1 | 0 | 0 | 1 | 0 | 1 | 174 | 7.5 | 135 |
| 1 | 0 | 0 | 1 | 0 | 1 | 175 | 7.5 | 135 |
| 1 | 0 | 0 | 1 | 0 | 1 | 176 | 7.5 | 135 |
| 1 | 0 | 0 | 1 | 0 | 1 | 177 | 7.5 | 135 |
| 1 | 0 | 0 | 1 | 0 | 1 | 178 | 7.5 | 135 |
| 1 | 0 | 0 | 1 | 0 | 1 | 179 | 7.5 | 135 |
| 1 | 0 | 0 | 1 | 0 | 1 | 180 | 7.5 | 135 |
| 1 | 0 | 0 | 0 | 1 | 1 | 0   | 7.5 | 45  |
| 1 | 0 | 0 | 0 | 1 | 1 | 1   | 7.5 | 45  |
| 1 | 0 | 0 | 0 | 1 | 1 | 2   | 7.5 | 45  |
| 1 | 0 | 0 | 0 | 1 | 1 | 3   | 7.5 | 45  |
| 1 | 0 | 0 | 0 | 1 | 1 | 4   | 7.5 | 45  |
| 1 | 0 | 0 | 0 | 1 | 1 | 5   | 7.5 | 45  |
| 1 | 0 | 0 | 0 | 1 | 1 | 6   | 7.5 | 45  |
| 1 | 0 | 0 | 0 | 1 | 1 | 7   | 7.5 | 45  |

|   |   |   |   |   |   |    |     |    |
|---|---|---|---|---|---|----|-----|----|
| 1 | 0 | 0 | 0 | 1 | 1 | 8  | 7.5 | 45 |
| 1 | 0 | 0 | 0 | 1 | 1 | 9  | 7.5 | 45 |
| 1 | 0 | 0 | 0 | 1 | 1 | 10 | 7.5 | 45 |
| 1 | 0 | 0 | 0 | 1 | 1 | 11 | 7.5 | 45 |
| 1 | 0 | 0 | 0 | 1 | 1 | 12 | 7.5 | 45 |
| 1 | 0 | 0 | 0 | 1 | 1 | 13 | 7.5 | 45 |
| 1 | 0 | 0 | 0 | 1 | 1 | 14 | 7.5 | 45 |
| 1 | 0 | 0 | 0 | 1 | 1 | 15 | 7.5 | 45 |
| 1 | 0 | 0 | 0 | 1 | 1 | 16 | 7.5 | 45 |
| 1 | 0 | 0 | 0 | 1 | 1 | 17 | 7.5 | 45 |
| 1 | 0 | 0 | 0 | 1 | 1 | 18 | 7.5 | 45 |
| 1 | 0 | 0 | 0 | 1 | 1 | 19 | 7.5 | 45 |
| 1 | 0 | 0 | 0 | 1 | 1 | 20 | 7.5 | 45 |
| 1 | 0 | 0 | 0 | 1 | 1 | 21 | 7.5 | 45 |
| 1 | 0 | 0 | 0 | 1 | 1 | 22 | 7.5 | 45 |
| 1 | 0 | 0 | 0 | 1 | 1 | 23 | 7.5 | 45 |
| 1 | 0 | 0 | 0 | 1 | 1 | 24 | 7.5 | 45 |
| 1 | 0 | 0 | 0 | 1 | 1 | 25 | 7.5 | 45 |
| 1 | 0 | 0 | 0 | 1 | 1 | 26 | 7.5 | 45 |
| 1 | 0 | 0 | 0 | 1 | 1 | 27 | 7.5 | 45 |
| 1 | 0 | 0 | 0 | 1 | 1 | 28 | 7.5 | 45 |
| 1 | 0 | 0 | 0 | 1 | 1 | 29 | 7.5 | 45 |
| 1 | 0 | 0 | 0 | 1 | 1 | 30 | 7.5 | 45 |
| 1 | 0 | 0 | 0 | 1 | 1 | 31 | 7.5 | 45 |
| 1 | 0 | 0 | 0 | 1 | 1 | 32 | 7.5 | 45 |
| 1 | 0 | 0 | 0 | 1 | 1 | 33 | 7.5 | 45 |
| 1 | 0 | 0 | 0 | 1 | 1 | 34 | 7.5 | 45 |
| 1 | 0 | 0 | 0 | 1 | 1 | 35 | 7.5 | 45 |
| 1 | 0 | 0 | 0 | 1 | 1 | 36 | 7.5 | 45 |
| 1 | 0 | 0 | 0 | 1 | 1 | 37 | 7.5 | 45 |
| 1 | 0 | 0 | 0 | 1 | 1 | 38 | 7.5 | 45 |
| 1 | 0 | 0 | 0 | 1 | 1 | 39 | 7.5 | 45 |
| 1 | 0 | 0 | 0 | 1 | 1 | 40 | 7.5 | 45 |
| 1 | 0 | 0 | 0 | 1 | 1 | 41 | 7.5 | 45 |
| 1 | 0 | 0 | 0 | 1 | 1 | 42 | 7.5 | 45 |
| 1 | 0 | 0 | 0 | 1 | 1 | 43 | 7.5 | 45 |
| 1 | 0 | 0 | 0 | 1 | 1 | 44 | 7.5 | 45 |
| 1 | 0 | 0 | 0 | 1 | 1 | 45 | 7.5 | 45 |
| 1 | 0 | 0 | 0 | 1 | 1 | 46 | 7.5 | 45 |
| 1 | 0 | 0 | 0 | 1 | 1 | 47 | 7.5 | 45 |
| 1 | 0 | 0 | 0 | 1 | 1 | 48 | 7.5 | 45 |
| 1 | 0 | 0 | 0 | 1 | 1 | 49 | 7.5 | 45 |
| 1 | 0 | 0 | 0 | 1 | 1 | 50 | 7.5 | 45 |
| 1 | 0 | 0 | 0 | 1 | 1 | 51 | 7.5 | 45 |
| 1 | 0 | 0 | 0 | 1 | 1 | 52 | 7.5 | 45 |
| 1 | 0 | 0 | 0 | 1 | 1 | 53 | 7.5 | 45 |

|   |   |   |   |   |   |    |     |     |
|---|---|---|---|---|---|----|-----|-----|
| 1 | 0 | 0 | 0 | 1 | 1 | 54 | 7.5 | 45  |
| 1 | 0 | 0 | 0 | 1 | 1 | 55 | 7.5 | 45  |
| 1 | 0 | 0 | 0 | 1 | 1 | 56 | 7.5 | 45  |
| 1 | 0 | 0 | 0 | 1 | 1 | 57 | 7.5 | 45  |
| 1 | 0 | 0 | 0 | 1 | 1 | 58 | 7.5 | 45  |
| 1 | 0 | 0 | 0 | 1 | 1 | 59 | 7.5 | 45  |
| 1 | 0 | 0 | 0 | 1 | 1 | 60 | 7.5 | 60  |
| 1 | 0 | 0 | 0 | 1 | 1 | 61 | 7.5 | 75  |
| 1 | 0 | 0 | 0 | 1 | 1 | 62 | 7.5 | 75  |
| 1 | 0 | 0 | 0 | 1 | 1 | 63 | 7.5 | 75  |
| 1 | 0 | 0 | 0 | 1 | 1 | 64 | 7.5 | 75  |
| 1 | 0 | 0 | 0 | 1 | 1 | 65 | 7.5 | 75  |
| 1 | 0 | 0 | 0 | 1 | 1 | 66 | 7.5 | 75  |
| 1 | 0 | 0 | 0 | 1 | 1 | 67 | 7.5 | 75  |
| 1 | 0 | 0 | 0 | 1 | 1 | 68 | 7.5 | 75  |
| 1 | 0 | 0 | 0 | 1 | 1 | 69 | 7.5 | 75  |
| 1 | 0 | 0 | 0 | 1 | 1 | 70 | 7.5 | 75  |
| 1 | 0 | 0 | 0 | 1 | 1 | 71 | 7.5 | 75  |
| 1 | 0 | 0 | 0 | 1 | 1 | 72 | 7.5 | 75  |
| 1 | 0 | 0 | 0 | 1 | 1 | 73 | 7.5 | 75  |
| 1 | 0 | 0 | 0 | 1 | 1 | 74 | 7.5 | 75  |
| 1 | 0 | 0 | 0 | 1 | 1 | 75 | 7.5 | 75  |
| 1 | 0 | 0 | 0 | 1 | 1 | 76 | 7.5 | 75  |
| 1 | 0 | 0 | 0 | 1 | 1 | 77 | 7.5 | 75  |
| 1 | 0 | 0 | 0 | 1 | 1 | 78 | 7.5 | 75  |
| 1 | 0 | 0 | 0 | 1 | 1 | 79 | 7.5 | 75  |
| 1 | 0 | 0 | 0 | 1 | 1 | 80 | 7.5 | 75  |
| 1 | 0 | 0 | 0 | 1 | 1 | 81 | 7.5 | 75  |
| 1 | 0 | 0 | 0 | 1 | 1 | 82 | 7.5 | 75  |
| 1 | 0 | 0 | 0 | 1 | 1 | 83 | 7.5 | 75  |
| 1 | 0 | 0 | 0 | 1 | 1 | 84 | 7.5 | 75  |
| 1 | 0 | 0 | 0 | 1 | 1 | 85 | 7.5 | 75  |
| 1 | 0 | 0 | 0 | 1 | 1 | 86 | 7.5 | 75  |
| 1 | 0 | 0 | 0 | 1 | 1 | 87 | 7.5 | 75  |
| 1 | 0 | 0 | 0 | 1 | 1 | 88 | 7.5 | 75  |
| 1 | 0 | 0 | 0 | 1 | 1 | 89 | 7.5 | 75  |
| 1 | 0 | 0 | 0 | 1 | 1 | 90 | 7.5 | 90  |
| 1 | 0 | 0 | 0 | 1 | 1 | 91 | 7.5 | 105 |
| 1 | 0 | 0 | 0 | 1 | 1 | 92 | 7.5 | 105 |
| 1 | 0 | 0 | 0 | 1 | 1 | 93 | 7.5 | 105 |
| 1 | 0 | 0 | 0 | 1 | 1 | 94 | 7.5 | 105 |
| 1 | 0 | 0 | 0 | 1 | 1 | 95 | 7.5 | 105 |
| 1 | 0 | 0 | 0 | 1 | 1 | 96 | 7.5 | 105 |
| 1 | 0 | 0 | 0 | 1 | 1 | 97 | 7.5 | 105 |
| 1 | 0 | 0 | 0 | 1 | 1 | 98 | 7.5 | 105 |
| 1 | 0 | 0 | 0 | 1 | 1 | 99 | 7.5 | 105 |

|   |   |   |   |   |   |     |     |     |
|---|---|---|---|---|---|-----|-----|-----|
| 1 | 0 | 0 | 0 | 1 | 1 | 100 | 7.5 | 105 |
| 1 | 0 | 0 | 0 | 1 | 1 | 101 | 7.5 | 105 |
| 1 | 0 | 0 | 0 | 1 | 1 | 102 | 7.5 | 105 |
| 1 | 0 | 0 | 0 | 1 | 1 | 103 | 7.5 | 105 |
| 1 | 0 | 0 | 0 | 1 | 1 | 104 | 7.5 | 105 |
| 1 | 0 | 0 | 0 | 1 | 1 | 105 | 7.5 | 105 |
| 1 | 0 | 0 | 0 | 1 | 1 | 106 | 7.5 | 105 |
| 1 | 0 | 0 | 0 | 1 | 1 | 107 | 7.5 | 105 |
| 1 | 0 | 0 | 0 | 1 | 1 | 108 | 7.5 | 105 |
| 1 | 0 | 0 | 0 | 1 | 1 | 109 | 7.5 | 105 |
| 1 | 0 | 0 | 0 | 1 | 1 | 110 | 7.5 | 105 |
| 1 | 0 | 0 | 0 | 1 | 1 | 111 | 7.5 | 105 |
| 1 | 0 | 0 | 0 | 1 | 1 | 112 | 7.5 | 105 |
| 1 | 0 | 0 | 0 | 1 | 1 | 113 | 7.5 | 105 |
| 1 | 0 | 0 | 0 | 1 | 1 | 114 | 7.5 | 105 |
| 1 | 0 | 0 | 0 | 1 | 1 | 115 | 7.5 | 105 |
| 1 | 0 | 0 | 0 | 1 | 1 | 116 | 7.5 | 105 |
| 1 | 0 | 0 | 0 | 1 | 1 | 117 | 7.5 | 105 |
| 1 | 0 | 0 | 0 | 1 | 1 | 118 | 7.5 | 105 |
| 1 | 0 | 0 | 0 | 1 | 1 | 119 | 7.5 | 105 |
| 1 | 0 | 0 | 0 | 1 | 1 | 120 | 7.5 | 105 |
| 1 | 0 | 0 | 0 | 1 | 1 | 121 | 7.5 | 105 |
| 1 | 0 | 0 | 0 | 1 | 1 | 122 | 7.5 | 105 |
| 1 | 0 | 0 | 0 | 1 | 1 | 123 | 7.5 | 105 |
| 1 | 0 | 0 | 0 | 1 | 1 | 124 | 7.5 | 105 |
| 1 | 0 | 0 | 0 | 1 | 1 | 125 | 7.5 | 105 |
| 1 | 0 | 0 | 0 | 1 | 1 | 126 | 7.5 | 105 |
| 1 | 0 | 0 | 0 | 1 | 1 | 127 | 7.5 | 105 |
| 1 | 0 | 0 | 0 | 1 | 1 | 128 | 7.5 | 105 |
| 1 | 0 | 0 | 0 | 1 | 1 | 129 | 7.5 | 105 |
| 1 | 0 | 0 | 0 | 1 | 1 | 130 | 7.5 | 105 |
| 1 | 0 | 0 | 0 | 1 | 1 | 131 | 7.5 | 105 |
| 1 | 0 | 0 | 0 | 1 | 1 | 132 | 7.5 | 105 |
| 1 | 0 | 0 | 0 | 1 | 1 | 133 | 7.5 | 105 |
| 1 | 0 | 0 | 0 | 1 | 1 | 134 | 7.5 | 105 |
| 1 | 0 | 0 | 0 | 1 | 1 | 135 | 7.5 | 105 |
| 1 | 0 | 0 | 0 | 1 | 1 | 136 | 7.5 | 105 |
| 1 | 0 | 0 | 0 | 1 | 1 | 137 | 7.5 | 105 |
| 1 | 0 | 0 | 0 | 1 | 1 | 138 | 7.5 | 105 |
| 1 | 0 | 0 | 0 | 1 | 1 | 139 | 7.5 | 105 |
| 1 | 0 | 0 | 0 | 1 | 1 | 140 | 7.5 | 105 |
| 1 | 0 | 0 | 0 | 1 | 1 | 141 | 7.5 | 105 |
| 1 | 0 | 0 | 0 | 1 | 1 | 142 | 7.5 | 105 |
| 1 | 0 | 0 | 0 | 1 | 1 | 143 | 7.5 | 105 |
| 1 | 0 | 0 | 0 | 1 | 1 | 144 | 7.5 | 105 |
| 1 | 0 | 0 | 0 | 1 | 1 | 145 | 7.5 | 105 |

|   |   |   |   |   |   |     |     |     |
|---|---|---|---|---|---|-----|-----|-----|
| 1 | 0 | 0 | 0 | 1 | 1 | 146 | 7.5 | 105 |
| 1 | 0 | 0 | 0 | 1 | 1 | 147 | 7.5 | 105 |
| 1 | 0 | 0 | 0 | 1 | 1 | 148 | 7.5 | 105 |
| 1 | 0 | 0 | 0 | 1 | 1 | 149 | 7.5 | 105 |
| 1 | 0 | 0 | 0 | 1 | 1 | 150 | 7.5 | 105 |
| 1 | 0 | 0 | 0 | 1 | 1 | 151 | 7.5 | 105 |
| 1 | 0 | 0 | 0 | 1 | 1 | 152 | 7.5 | 105 |
| 1 | 0 | 0 | 0 | 1 | 1 | 153 | 7.5 | 105 |
| 1 | 0 | 0 | 0 | 1 | 1 | 154 | 7.5 | 105 |
| 1 | 0 | 0 | 0 | 1 | 1 | 155 | 7.5 | 105 |
| 1 | 0 | 0 | 0 | 1 | 1 | 156 | 7.5 | 105 |
| 1 | 0 | 0 | 0 | 1 | 1 | 157 | 7.5 | 105 |
| 1 | 0 | 0 | 0 | 1 | 1 | 158 | 7.5 | 105 |
| 1 | 0 | 0 | 0 | 1 | 1 | 159 | 7.5 | 105 |
| 1 | 0 | 0 | 0 | 1 | 1 | 160 | 7.5 | 105 |
| 1 | 0 | 0 | 0 | 1 | 1 | 161 | 7.5 | 105 |
| 1 | 0 | 0 | 0 | 1 | 1 | 162 | 7.5 | 105 |
| 1 | 0 | 0 | 0 | 1 | 1 | 163 | 7.5 | 105 |
| 1 | 0 | 0 | 0 | 1 | 1 | 164 | 7.5 | 105 |
| 1 | 0 | 0 | 0 | 1 | 1 | 165 | 7.5 | 105 |
| 1 | 0 | 0 | 0 | 1 | 1 | 166 | 7.5 | 105 |
| 1 | 0 | 0 | 0 | 1 | 1 | 167 | 7.5 | 105 |
| 1 | 0 | 0 | 0 | 1 | 1 | 168 | 7.5 | 105 |
| 1 | 0 | 0 | 0 | 1 | 1 | 169 | 7.5 | 105 |
| 1 | 0 | 0 | 0 | 1 | 1 | 170 | 7.5 | 105 |
| 1 | 0 | 0 | 0 | 1 | 1 | 171 | 7.5 | 105 |
| 1 | 0 | 0 | 0 | 1 | 1 | 172 | 7.5 | 105 |
| 1 | 0 | 0 | 0 | 1 | 1 | 173 | 7.5 | 105 |
| 1 | 0 | 0 | 0 | 1 | 1 | 174 | 7.5 | 105 |
| 1 | 0 | 0 | 0 | 1 | 1 | 175 | 7.5 | 105 |
| 1 | 0 | 0 | 0 | 1 | 1 | 176 | 7.5 | 105 |
| 1 | 0 | 0 | 0 | 1 | 1 | 177 | 7.5 | 105 |
| 1 | 0 | 0 | 0 | 1 | 1 | 178 | 7.5 | 105 |
| 1 | 0 | 0 | 0 | 1 | 1 | 179 | 7.5 | 105 |
| 1 | 0 | 0 | 0 | 1 | 1 | 180 | 7.5 | 105 |
| 1 | 1 | 1 | 1 | 0 | 0 | 0   | 7.5 | 135 |
| 1 | 1 | 1 | 1 | 0 | 0 | 1   | 7.5 | 135 |
| 1 | 1 | 1 | 1 | 0 | 0 | 2   | 7.5 | 135 |
| 1 | 1 | 1 | 1 | 0 | 0 | 3   | 7.5 | 135 |
| 1 | 1 | 1 | 1 | 0 | 0 | 4   | 7.5 | 135 |
| 1 | 1 | 1 | 1 | 0 | 0 | 5   | 7.5 | 135 |
| 1 | 1 | 1 | 1 | 0 | 0 | 6   | 7.5 | 135 |
| 1 | 1 | 1 | 1 | 0 | 0 | 7   | 7.5 | 135 |
| 1 | 1 | 1 | 1 | 0 | 0 | 8   | 7.5 | 135 |
| 1 | 1 | 1 | 1 | 0 | 0 | 9   | 7.5 | 135 |
| 1 | 1 | 1 | 1 | 0 | 0 | 10  | 7.5 | 135 |

|   |   |   |   |   |   |    |     |     |
|---|---|---|---|---|---|----|-----|-----|
| 1 | 1 | 1 | 1 | 0 | 0 | 11 | 7.5 | 135 |
| 1 | 1 | 1 | 1 | 0 | 0 | 12 | 7.5 | 135 |
| 1 | 1 | 1 | 1 | 0 | 0 | 13 | 7.5 | 135 |
| 1 | 1 | 1 | 1 | 0 | 0 | 14 | 7.5 | 135 |
| 1 | 1 | 1 | 1 | 0 | 0 | 15 | 7.5 | 135 |
| 1 | 1 | 1 | 1 | 0 | 0 | 16 | 7.5 | 135 |
| 1 | 1 | 1 | 1 | 0 | 0 | 17 | 7.5 | 135 |
| 1 | 1 | 1 | 1 | 0 | 0 | 18 | 7.5 | 135 |
| 1 | 1 | 1 | 1 | 0 | 0 | 19 | 7.5 | 135 |
| 1 | 1 | 1 | 1 | 0 | 0 | 20 | 7.5 | 135 |
| 1 | 1 | 1 | 1 | 0 | 0 | 21 | 7.5 | 135 |
| 1 | 1 | 1 | 1 | 0 | 0 | 22 | 7.5 | 135 |
| 1 | 1 | 1 | 1 | 0 | 0 | 23 | 7.5 | 135 |
| 1 | 1 | 1 | 1 | 0 | 0 | 24 | 7.5 | 135 |
| 1 | 1 | 1 | 1 | 0 | 0 | 25 | 7.5 | 135 |
| 1 | 1 | 1 | 1 | 0 | 0 | 26 | 7.5 | 135 |
| 1 | 1 | 1 | 1 | 0 | 0 | 27 | 7.5 | 135 |
| 1 | 1 | 1 | 1 | 0 | 0 | 28 | 7.5 | 135 |
| 1 | 1 | 1 | 1 | 0 | 0 | 29 | 7.5 | 135 |
| 1 | 1 | 1 | 1 | 0 | 0 | 30 | 7.5 | 135 |
| 1 | 1 | 1 | 1 | 0 | 0 | 31 | 7.5 | 135 |
| 1 | 1 | 1 | 1 | 0 | 0 | 32 | 7.5 | 135 |
| 1 | 1 | 1 | 1 | 0 | 0 | 33 | 7.5 | 135 |
| 1 | 1 | 1 | 1 | 0 | 0 | 34 | 7.5 | 135 |
| 1 | 1 | 1 | 1 | 0 | 0 | 35 | 7.5 | 135 |
| 1 | 1 | 1 | 1 | 0 | 0 | 36 | 7.5 | 135 |
| 1 | 1 | 1 | 1 | 0 | 0 | 37 | 7.5 | 135 |
| 1 | 1 | 1 | 1 | 0 | 0 | 38 | 7.5 | 135 |
| 1 | 1 | 1 | 1 | 0 | 0 | 39 | 7.5 | 135 |
| 1 | 1 | 1 | 1 | 0 | 0 | 40 | 7.5 | 135 |
| 1 | 1 | 1 | 1 | 0 | 0 | 41 | 7.5 | 135 |
| 1 | 1 | 1 | 1 | 0 | 0 | 42 | 7.5 | 135 |
| 1 | 1 | 1 | 1 | 0 | 0 | 43 | 7.5 | 135 |
| 1 | 1 | 1 | 1 | 0 | 0 | 44 | 7.5 | 135 |
| 1 | 1 | 1 | 1 | 0 | 0 | 45 | 7.5 | 135 |
| 1 | 1 | 1 | 1 | 0 | 0 | 46 | 7.5 | 135 |
| 1 | 1 | 1 | 1 | 0 | 0 | 47 | 7.5 | 135 |
| 1 | 1 | 1 | 1 | 0 | 0 | 48 | 7.5 | 135 |
| 1 | 1 | 1 | 1 | 0 | 0 | 49 | 7.5 | 135 |
| 1 | 1 | 1 | 1 | 0 | 0 | 50 | 7.5 | 135 |
| 1 | 1 | 1 | 1 | 0 | 0 | 51 | 7.5 | 135 |
| 1 | 1 | 1 | 1 | 0 | 0 | 52 | 7.5 | 135 |
| 1 | 1 | 1 | 1 | 0 | 0 | 53 | 7.5 | 135 |
| 1 | 1 | 1 | 1 | 0 | 0 | 54 | 7.5 | 135 |
| 1 | 1 | 1 | 1 | 0 | 0 | 55 | 7.5 | 135 |
| 1 | 1 | 1 | 1 | 0 | 0 | 56 | 7.5 | 135 |

|   |   |   |   |   |   |     |     |     |
|---|---|---|---|---|---|-----|-----|-----|
| 1 | 1 | 1 | 1 | 0 | 0 | 57  | 7.5 | 135 |
| 1 | 1 | 1 | 1 | 0 | 0 | 58  | 7.5 | 135 |
| 1 | 1 | 1 | 1 | 0 | 0 | 59  | 7.5 | 135 |
| 1 | 1 | 1 | 1 | 0 | 0 | 60  | 7.5 | 135 |
| 1 | 1 | 1 | 1 | 0 | 0 | 61  | 7.5 | 135 |
| 1 | 1 | 1 | 1 | 0 | 0 | 62  | 7.5 | 135 |
| 1 | 1 | 1 | 1 | 0 | 0 | 63  | 7.5 | 135 |
| 1 | 1 | 1 | 1 | 0 | 0 | 64  | 7.5 | 135 |
| 1 | 1 | 1 | 1 | 0 | 0 | 65  | 7.5 | 135 |
| 1 | 1 | 1 | 1 | 0 | 0 | 66  | 7.5 | 135 |
| 1 | 1 | 1 | 1 | 0 | 0 | 67  | 7.5 | 135 |
| 1 | 1 | 1 | 1 | 0 | 0 | 68  | 7.5 | 135 |
| 1 | 1 | 1 | 1 | 0 | 0 | 69  | 7.5 | 135 |
| 1 | 1 | 1 | 1 | 0 | 0 | 70  | 7.5 | 135 |
| 1 | 1 | 1 | 1 | 0 | 0 | 71  | 7.5 | 135 |
| 1 | 1 | 1 | 1 | 0 | 0 | 72  | 7.5 | 135 |
| 1 | 1 | 1 | 1 | 0 | 0 | 73  | 7.5 | 135 |
| 1 | 1 | 1 | 1 | 0 | 0 | 74  | 7.5 | 135 |
| 1 | 1 | 1 | 1 | 0 | 0 | 75  | 7.5 | 135 |
| 1 | 1 | 1 | 1 | 0 | 0 | 76  | 7.5 | 135 |
| 1 | 1 | 1 | 1 | 0 | 0 | 77  | 7.5 | 135 |
| 1 | 1 | 1 | 1 | 0 | 0 | 78  | 7.5 | 135 |
| 1 | 1 | 1 | 1 | 0 | 0 | 79  | 7.5 | 135 |
| 1 | 1 | 1 | 1 | 0 | 0 | 80  | 7.5 | 135 |
| 1 | 1 | 1 | 1 | 0 | 0 | 81  | 7.5 | 135 |
| 1 | 1 | 1 | 1 | 0 | 0 | 82  | 7.5 | 135 |
| 1 | 1 | 1 | 1 | 0 | 0 | 83  | 7.5 | 135 |
| 1 | 1 | 1 | 1 | 0 | 0 | 84  | 7.5 | 135 |
| 1 | 1 | 1 | 1 | 0 | 0 | 85  | 7.5 | 135 |
| 1 | 1 | 1 | 1 | 0 | 0 | 86  | 7.5 | 135 |
| 1 | 1 | 1 | 1 | 0 | 0 | 87  | 7.5 | 135 |
| 1 | 1 | 1 | 1 | 0 | 0 | 88  | 7.5 | 135 |
| 1 | 1 | 1 | 1 | 0 | 0 | 89  | 7.5 | 135 |
| 1 | 1 | 1 | 1 | 0 | 0 | 90  | 7.5 | 135 |
| 1 | 1 | 1 | 1 | 0 | 0 | 91  | 7.5 | 135 |
| 1 | 1 | 1 | 1 | 0 | 0 | 92  | 7.5 | 135 |
| 1 | 1 | 1 | 1 | 0 | 0 | 93  | 7.5 | 135 |
| 1 | 1 | 1 | 1 | 0 | 0 | 94  | 7.5 | 135 |
| 1 | 1 | 1 | 1 | 0 | 0 | 95  | 7.5 | 135 |
| 1 | 1 | 1 | 1 | 0 | 0 | 96  | 7.5 | 135 |
| 1 | 1 | 1 | 1 | 0 | 0 | 97  | 7.5 | 135 |
| 1 | 1 | 1 | 1 | 0 | 0 | 98  | 7.5 | 135 |
| 1 | 1 | 1 | 1 | 0 | 0 | 99  | 7.5 | 135 |
| 1 | 1 | 1 | 1 | 0 | 0 | 100 | 7.5 | 135 |
| 1 | 1 | 1 | 1 | 0 | 0 | 101 | 7.5 | 135 |
| 1 | 1 | 1 | 1 | 0 | 0 | 102 | 7.5 | 135 |

|   |   |   |   |   |   |     |     |     |
|---|---|---|---|---|---|-----|-----|-----|
| 1 | 1 | 1 | 1 | 0 | 0 | 103 | 7.5 | 135 |
| 1 | 1 | 1 | 1 | 0 | 0 | 104 | 7.5 | 135 |
| 1 | 1 | 1 | 1 | 0 | 0 | 105 | 7.5 | 135 |
| 1 | 1 | 1 | 1 | 0 | 0 | 106 | 7.5 | 135 |
| 1 | 1 | 1 | 1 | 0 | 0 | 107 | 7.5 | 135 |
| 1 | 1 | 1 | 1 | 0 | 0 | 108 | 7.5 | 135 |
| 1 | 1 | 1 | 1 | 0 | 0 | 109 | 7.5 | 135 |
| 1 | 1 | 1 | 1 | 0 | 0 | 110 | 7.5 | 135 |
| 1 | 1 | 1 | 1 | 0 | 0 | 111 | 7.5 | 135 |
| 1 | 1 | 1 | 1 | 0 | 0 | 112 | 7.5 | 135 |
| 1 | 1 | 1 | 1 | 0 | 0 | 113 | 7.5 | 135 |
| 1 | 1 | 1 | 1 | 0 | 0 | 114 | 7.5 | 135 |
| 1 | 1 | 1 | 1 | 0 | 0 | 115 | 7.5 | 135 |
| 1 | 1 | 1 | 1 | 0 | 0 | 116 | 7.5 | 135 |
| 1 | 1 | 1 | 1 | 0 | 0 | 117 | 7.5 | 135 |
| 1 | 1 | 1 | 1 | 0 | 0 | 118 | 7.5 | 135 |
| 1 | 1 | 1 | 1 | 0 | 0 | 119 | 7.5 | 135 |
| 1 | 1 | 1 | 1 | 0 | 0 | 120 | 7.5 | 135 |
| 1 | 1 | 1 | 1 | 0 | 0 | 121 | 7.5 | 135 |
| 1 | 1 | 1 | 1 | 0 | 0 | 122 | 7.5 | 135 |
| 1 | 1 | 1 | 1 | 0 | 0 | 123 | 7.5 | 135 |
| 1 | 1 | 1 | 1 | 0 | 0 | 124 | 7.5 | 135 |
| 1 | 1 | 1 | 1 | 0 | 0 | 125 | 7.5 | 135 |
| 1 | 1 | 1 | 1 | 0 | 0 | 126 | 7.5 | 135 |
| 1 | 1 | 1 | 1 | 0 | 0 | 127 | 7.5 | 135 |
| 1 | 1 | 1 | 1 | 0 | 0 | 128 | 7.5 | 135 |
| 1 | 1 | 1 | 1 | 0 | 0 | 129 | 7.5 | 135 |
| 1 | 1 | 1 | 1 | 0 | 0 | 130 | 7.5 | 135 |
| 1 | 1 | 1 | 1 | 0 | 0 | 131 | 7.5 | 135 |
| 1 | 1 | 1 | 1 | 0 | 0 | 132 | 7.5 | 135 |
| 1 | 1 | 1 | 1 | 0 | 0 | 133 | 7.5 | 135 |
| 1 | 1 | 1 | 1 | 0 | 0 | 134 | 7.5 | 135 |
| 1 | 1 | 1 | 1 | 0 | 0 | 135 | 7.5 | 135 |
| 1 | 1 | 1 | 1 | 0 | 0 | 136 | 7.5 | 135 |
| 1 | 1 | 1 | 1 | 0 | 0 | 137 | 7.5 | 135 |
| 1 | 1 | 1 | 1 | 0 | 0 | 138 | 7.5 | 135 |
| 1 | 1 | 1 | 1 | 0 | 0 | 139 | 7.5 | 135 |
| 1 | 1 | 1 | 1 | 0 | 0 | 140 | 7.5 | 135 |
| 1 | 1 | 1 | 1 | 0 | 0 | 141 | 7.5 | 135 |
| 1 | 1 | 1 | 1 | 0 | 0 | 142 | 7.5 | 135 |
| 1 | 1 | 1 | 1 | 0 | 0 | 143 | 7.5 | 135 |
| 1 | 1 | 1 | 1 | 0 | 0 | 144 | 7.5 | 135 |
| 1 | 1 | 1 | 1 | 0 | 0 | 145 | 7.5 | 135 |
| 1 | 1 | 1 | 1 | 0 | 0 | 146 | 7.5 | 135 |
| 1 | 1 | 1 | 1 | 0 | 0 | 147 | 7.5 | 135 |
| 1 | 1 | 1 | 1 | 0 | 0 | 148 | 7.5 | 135 |

|   |   |   |   |   |   |     |     |     |
|---|---|---|---|---|---|-----|-----|-----|
| 1 | 1 | 1 | 1 | 0 | 0 | 149 | 7.5 | 135 |
| 1 | 1 | 1 | 1 | 0 | 0 | 150 | 7.5 | 150 |
| 1 | 1 | 1 | 1 | 0 | 0 | 151 | 7.5 | 165 |
| 1 | 1 | 1 | 1 | 0 | 0 | 152 | 7.5 | 165 |
| 1 | 1 | 1 | 1 | 0 | 0 | 153 | 7.5 | 165 |
| 1 | 1 | 1 | 1 | 0 | 0 | 154 | 7.5 | 165 |
| 1 | 1 | 1 | 1 | 0 | 0 | 155 | 7.5 | 165 |
| 1 | 1 | 1 | 1 | 0 | 0 | 156 | 7.5 | 165 |
| 1 | 1 | 1 | 1 | 0 | 0 | 157 | 7.5 | 165 |
| 1 | 1 | 1 | 1 | 0 | 0 | 158 | 7.5 | 165 |
| 1 | 1 | 1 | 1 | 0 | 0 | 159 | 7.5 | 165 |
| 1 | 1 | 1 | 1 | 0 | 0 | 160 | 7.5 | 165 |
| 1 | 1 | 1 | 1 | 0 | 0 | 161 | 7.5 | 165 |
| 1 | 1 | 1 | 1 | 0 | 0 | 162 | 7.5 | 165 |
| 1 | 1 | 1 | 1 | 0 | 0 | 163 | 7.5 | 165 |
| 1 | 1 | 1 | 1 | 0 | 0 | 164 | 7.5 | 165 |
| 1 | 1 | 1 | 1 | 0 | 0 | 165 | 7.5 | 165 |
| 1 | 1 | 1 | 1 | 0 | 0 | 166 | 7.5 | 165 |
| 1 | 1 | 1 | 1 | 0 | 0 | 167 | 7.5 | 165 |
| 1 | 1 | 1 | 1 | 0 | 0 | 168 | 7.5 | 165 |
| 1 | 1 | 1 | 1 | 0 | 0 | 169 | 7.5 | 165 |
| 1 | 1 | 1 | 1 | 0 | 0 | 170 | 7.5 | 165 |
| 1 | 1 | 1 | 1 | 0 | 0 | 171 | 7.5 | 165 |
| 1 | 1 | 1 | 1 | 0 | 0 | 172 | 7.5 | 165 |
| 1 | 1 | 1 | 1 | 0 | 0 | 173 | 7.5 | 165 |
| 1 | 1 | 1 | 1 | 0 | 0 | 174 | 7.5 | 165 |
| 1 | 1 | 1 | 1 | 0 | 0 | 175 | 7.5 | 165 |
| 1 | 1 | 1 | 1 | 0 | 0 | 176 | 7.5 | 165 |
| 1 | 1 | 1 | 1 | 0 | 0 | 177 | 7.5 | 165 |
| 1 | 1 | 1 | 1 | 0 | 0 | 178 | 7.5 | 165 |
| 1 | 1 | 1 | 1 | 0 | 0 | 179 | 7.5 | 165 |
| 1 | 1 | 1 | 1 | 0 | 0 | 180 | 7.5 | 180 |
| 1 | 1 | 1 | 0 | 1 | 0 | 0   | 7.5 | 105 |
| 1 | 1 | 1 | 0 | 1 | 0 | 1   | 7.5 | 105 |
| 1 | 1 | 1 | 0 | 1 | 0 | 2   | 7.5 | 105 |
| 1 | 1 | 1 | 0 | 1 | 0 | 3   | 7.5 | 105 |
| 1 | 1 | 1 | 0 | 1 | 0 | 4   | 7.5 | 105 |
| 1 | 1 | 1 | 0 | 1 | 0 | 5   | 7.5 | 105 |
| 1 | 1 | 1 | 0 | 1 | 0 | 6   | 7.5 | 105 |
| 1 | 1 | 1 | 0 | 1 | 0 | 7   | 7.5 | 105 |
| 1 | 1 | 1 | 0 | 1 | 0 | 8   | 7.5 | 105 |
| 1 | 1 | 1 | 0 | 1 | 0 | 9   | 7.5 | 105 |
| 1 | 1 | 1 | 0 | 1 | 0 | 10  | 7.5 | 105 |
| 1 | 1 | 1 | 0 | 1 | 0 | 11  | 7.5 | 105 |
| 1 | 1 | 1 | 0 | 1 | 0 | 12  | 7.5 | 105 |
| 1 | 1 | 1 | 0 | 1 | 0 | 13  | 7.5 | 105 |

|   |   |   |   |   |   |    |     |     |
|---|---|---|---|---|---|----|-----|-----|
| 1 | 1 | 1 | 0 | 1 | 0 | 14 | 7.5 | 105 |
| 1 | 1 | 1 | 0 | 1 | 0 | 15 | 7.5 | 105 |
| 1 | 1 | 1 | 0 | 1 | 0 | 16 | 7.5 | 105 |
| 1 | 1 | 1 | 0 | 1 | 0 | 17 | 7.5 | 105 |
| 1 | 1 | 1 | 0 | 1 | 0 | 18 | 7.5 | 105 |
| 1 | 1 | 1 | 0 | 1 | 0 | 19 | 7.5 | 105 |
| 1 | 1 | 1 | 0 | 1 | 0 | 20 | 7.5 | 105 |
| 1 | 1 | 1 | 0 | 1 | 0 | 21 | 7.5 | 105 |
| 1 | 1 | 1 | 0 | 1 | 0 | 22 | 7.5 | 105 |
| 1 | 1 | 1 | 0 | 1 | 0 | 23 | 7.5 | 105 |
| 1 | 1 | 1 | 0 | 1 | 0 | 24 | 7.5 | 105 |
| 1 | 1 | 1 | 0 | 1 | 0 | 25 | 7.5 | 105 |
| 1 | 1 | 1 | 0 | 1 | 0 | 26 | 7.5 | 105 |
| 1 | 1 | 1 | 0 | 1 | 0 | 27 | 7.5 | 105 |
| 1 | 1 | 1 | 0 | 1 | 0 | 28 | 7.5 | 105 |
| 1 | 1 | 1 | 0 | 1 | 0 | 29 | 7.5 | 105 |
| 1 | 1 | 1 | 0 | 1 | 0 | 30 | 7.5 | 105 |
| 1 | 1 | 1 | 0 | 1 | 0 | 31 | 7.5 | 105 |
| 1 | 1 | 1 | 0 | 1 | 0 | 32 | 7.5 | 105 |
| 1 | 1 | 1 | 0 | 1 | 0 | 33 | 7.5 | 105 |
| 1 | 1 | 1 | 0 | 1 | 0 | 34 | 7.5 | 105 |
| 1 | 1 | 1 | 0 | 1 | 0 | 35 | 7.5 | 105 |
| 1 | 1 | 1 | 0 | 1 | 0 | 36 | 7.5 | 105 |
| 1 | 1 | 1 | 0 | 1 | 0 | 37 | 7.5 | 105 |
| 1 | 1 | 1 | 0 | 1 | 0 | 38 | 7.5 | 105 |
| 1 | 1 | 1 | 0 | 1 | 0 | 39 | 7.5 | 105 |
| 1 | 1 | 1 | 0 | 1 | 0 | 40 | 7.5 | 105 |
| 1 | 1 | 1 | 0 | 1 | 0 | 41 | 7.5 | 105 |
| 1 | 1 | 1 | 0 | 1 | 0 | 42 | 7.5 | 105 |
| 1 | 1 | 1 | 0 | 1 | 0 | 43 | 7.5 | 105 |
| 1 | 1 | 1 | 0 | 1 | 0 | 44 | 7.5 | 105 |
| 1 | 1 | 1 | 0 | 1 | 0 | 45 | 7.5 | 105 |
| 1 | 1 | 1 | 0 | 1 | 0 | 46 | 7.5 | 105 |
| 1 | 1 | 1 | 0 | 1 | 0 | 47 | 7.5 | 105 |
| 1 | 1 | 1 | 0 | 1 | 0 | 48 | 7.5 | 105 |
| 1 | 1 | 1 | 0 | 1 | 0 | 49 | 7.5 | 105 |
| 1 | 1 | 1 | 0 | 1 | 0 | 50 | 7.5 | 105 |
| 1 | 1 | 1 | 0 | 1 | 0 | 51 | 7.5 | 105 |
| 1 | 1 | 1 | 0 | 1 | 0 | 52 | 7.5 | 105 |
| 1 | 1 | 1 | 0 | 1 | 0 | 53 | 7.5 | 105 |
| 1 | 1 | 1 | 0 | 1 | 0 | 54 | 7.5 | 105 |
| 1 | 1 | 1 | 0 | 1 | 0 | 55 | 7.5 | 105 |
| 1 | 1 | 1 | 0 | 1 | 0 | 56 | 7.5 | 105 |
| 1 | 1 | 1 | 0 | 1 | 0 | 57 | 7.5 | 105 |
| 1 | 1 | 1 | 0 | 1 | 0 | 58 | 7.5 | 105 |
| 1 | 1 | 1 | 0 | 1 | 0 | 59 | 7.5 | 105 |

|   |   |   |   |   |   |     |     |     |
|---|---|---|---|---|---|-----|-----|-----|
| 1 | 1 | 1 | 0 | 1 | 0 | 60  | 7.5 | 105 |
| 1 | 1 | 1 | 0 | 1 | 0 | 61  | 7.5 | 105 |
| 1 | 1 | 1 | 0 | 1 | 0 | 62  | 7.5 | 105 |
| 1 | 1 | 1 | 0 | 1 | 0 | 63  | 7.5 | 105 |
| 1 | 1 | 1 | 0 | 1 | 0 | 64  | 7.5 | 105 |
| 1 | 1 | 1 | 0 | 1 | 0 | 65  | 7.5 | 105 |
| 1 | 1 | 1 | 0 | 1 | 0 | 66  | 7.5 | 105 |
| 1 | 1 | 1 | 0 | 1 | 0 | 67  | 7.5 | 105 |
| 1 | 1 | 1 | 0 | 1 | 0 | 68  | 7.5 | 105 |
| 1 | 1 | 1 | 0 | 1 | 0 | 69  | 7.5 | 105 |
| 1 | 1 | 1 | 0 | 1 | 0 | 70  | 7.5 | 105 |
| 1 | 1 | 1 | 0 | 1 | 0 | 71  | 7.5 | 105 |
| 1 | 1 | 1 | 0 | 1 | 0 | 72  | 7.5 | 105 |
| 1 | 1 | 1 | 0 | 1 | 0 | 73  | 7.5 | 105 |
| 1 | 1 | 1 | 0 | 1 | 0 | 74  | 7.5 | 105 |
| 1 | 1 | 1 | 0 | 1 | 0 | 75  | 7.5 | 105 |
| 1 | 1 | 1 | 0 | 1 | 0 | 76  | 7.5 | 105 |
| 1 | 1 | 1 | 0 | 1 | 0 | 77  | 7.5 | 105 |
| 1 | 1 | 1 | 0 | 1 | 0 | 78  | 7.5 | 105 |
| 1 | 1 | 1 | 0 | 1 | 0 | 79  | 7.5 | 105 |
| 1 | 1 | 1 | 0 | 1 | 0 | 80  | 7.5 | 105 |
| 1 | 1 | 1 | 0 | 1 | 0 | 81  | 7.5 | 105 |
| 1 | 1 | 1 | 0 | 1 | 0 | 82  | 7.5 | 105 |
| 1 | 1 | 1 | 0 | 1 | 0 | 83  | 7.5 | 105 |
| 1 | 1 | 1 | 0 | 1 | 0 | 84  | 7.5 | 105 |
| 1 | 1 | 1 | 0 | 1 | 0 | 85  | 7.5 | 105 |
| 1 | 1 | 1 | 0 | 1 | 0 | 86  | 7.5 | 105 |
| 1 | 1 | 1 | 0 | 1 | 0 | 87  | 7.5 | 105 |
| 1 | 1 | 1 | 0 | 1 | 0 | 88  | 7.5 | 105 |
| 1 | 1 | 1 | 0 | 1 | 0 | 89  | 7.5 | 105 |
| 1 | 1 | 1 | 0 | 1 | 0 | 90  | 7.5 | 105 |
| 1 | 1 | 1 | 0 | 1 | 0 | 91  | 7.5 | 105 |
| 1 | 1 | 1 | 0 | 1 | 0 | 92  | 7.5 | 105 |
| 1 | 1 | 1 | 0 | 1 | 0 | 93  | 7.5 | 105 |
| 1 | 1 | 1 | 0 | 1 | 0 | 94  | 7.5 | 105 |
| 1 | 1 | 1 | 0 | 1 | 0 | 95  | 7.5 | 105 |
| 1 | 1 | 1 | 0 | 1 | 0 | 96  | 7.5 | 105 |
| 1 | 1 | 1 | 0 | 1 | 0 | 97  | 7.5 | 105 |
| 1 | 1 | 1 | 0 | 1 | 0 | 98  | 7.5 | 105 |
| 1 | 1 | 1 | 0 | 1 | 0 | 99  | 7.5 | 105 |
| 1 | 1 | 1 | 0 | 1 | 0 | 100 | 7.5 | 105 |
| 1 | 1 | 1 | 0 | 1 | 0 | 101 | 7.5 | 105 |
| 1 | 1 | 1 | 0 | 1 | 0 | 102 | 7.5 | 105 |
| 1 | 1 | 1 | 0 | 1 | 0 | 103 | 7.5 | 105 |
| 1 | 1 | 1 | 0 | 1 | 0 | 104 | 7.5 | 105 |
| 1 | 1 | 1 | 0 | 1 | 0 | 105 | 7.5 | 105 |

|   |   |   |   |   |   |     |     |     |
|---|---|---|---|---|---|-----|-----|-----|
| 1 | 1 | 1 | 0 | 1 | 0 | 106 | 7.5 | 105 |
| 1 | 1 | 1 | 0 | 1 | 0 | 107 | 7.5 | 105 |
| 1 | 1 | 1 | 0 | 1 | 0 | 108 | 7.5 | 105 |
| 1 | 1 | 1 | 0 | 1 | 0 | 109 | 7.5 | 105 |
| 1 | 1 | 1 | 0 | 1 | 0 | 110 | 7.5 | 105 |
| 1 | 1 | 1 | 0 | 1 | 0 | 111 | 7.5 | 105 |
| 1 | 1 | 1 | 0 | 1 | 0 | 112 | 7.5 | 105 |
| 1 | 1 | 1 | 0 | 1 | 0 | 113 | 7.5 | 105 |
| 1 | 1 | 1 | 0 | 1 | 0 | 114 | 7.5 | 105 |
| 1 | 1 | 1 | 0 | 1 | 0 | 115 | 7.5 | 105 |
| 1 | 1 | 1 | 0 | 1 | 0 | 116 | 7.5 | 105 |
| 1 | 1 | 1 | 0 | 1 | 0 | 117 | 7.5 | 105 |
| 1 | 1 | 1 | 0 | 1 | 0 | 118 | 7.5 | 105 |
| 1 | 1 | 1 | 0 | 1 | 0 | 119 | 7.5 | 105 |
| 1 | 1 | 1 | 0 | 1 | 0 | 120 | 7.5 | 105 |
| 1 | 1 | 1 | 0 | 1 | 0 | 121 | 7.5 | 105 |
| 1 | 1 | 1 | 0 | 1 | 0 | 122 | 7.5 | 105 |
| 1 | 1 | 1 | 0 | 1 | 0 | 123 | 7.5 | 105 |
| 1 | 1 | 1 | 0 | 1 | 0 | 124 | 7.5 | 105 |
| 1 | 1 | 1 | 0 | 1 | 0 | 125 | 7.5 | 105 |
| 1 | 1 | 1 | 0 | 1 | 0 | 126 | 7.5 | 105 |
| 1 | 1 | 1 | 0 | 1 | 0 | 127 | 7.5 | 105 |
| 1 | 1 | 1 | 0 | 1 | 0 | 128 | 7.5 | 105 |
| 1 | 1 | 1 | 0 | 1 | 0 | 129 | 7.5 | 105 |
| 1 | 1 | 1 | 0 | 1 | 0 | 130 | 7.5 | 105 |
| 1 | 1 | 1 | 0 | 1 | 0 | 131 | 7.5 | 105 |
| 1 | 1 | 1 | 0 | 1 | 0 | 132 | 7.5 | 105 |
| 1 | 1 | 1 | 0 | 1 | 0 | 133 | 7.5 | 105 |
| 1 | 1 | 1 | 0 | 1 | 0 | 134 | 7.5 | 105 |
| 1 | 1 | 1 | 0 | 1 | 0 | 135 | 7.5 | 105 |
| 1 | 1 | 1 | 0 | 1 | 0 | 136 | 7.5 | 165 |
| 1 | 1 | 1 | 0 | 1 | 0 | 137 | 7.5 | 165 |
| 1 | 1 | 1 | 0 | 1 | 0 | 138 | 7.5 | 165 |
| 1 | 1 | 1 | 0 | 1 | 0 | 139 | 7.5 | 165 |
| 1 | 1 | 1 | 0 | 1 | 0 | 140 | 7.5 | 165 |
| 1 | 1 | 1 | 0 | 1 | 0 | 141 | 7.5 | 165 |
| 1 | 1 | 1 | 0 | 1 | 0 | 142 | 7.5 | 165 |
| 1 | 1 | 1 | 0 | 1 | 0 | 143 | 7.5 | 165 |
| 1 | 1 | 1 | 0 | 1 | 0 | 144 | 7.5 | 165 |
| 1 | 1 | 1 | 0 | 1 | 0 | 145 | 7.5 | 165 |
| 1 | 1 | 1 | 0 | 1 | 0 | 146 | 7.5 | 165 |
| 1 | 1 | 1 | 0 | 1 | 0 | 147 | 7.5 | 165 |
| 1 | 1 | 1 | 0 | 1 | 0 | 148 | 7.5 | 165 |
| 1 | 1 | 1 | 0 | 1 | 0 | 149 | 7.5 | 165 |
| 1 | 1 | 1 | 0 | 1 | 0 | 150 | 7.5 | 165 |
| 1 | 1 | 1 | 0 | 1 | 0 | 151 | 7.5 | 165 |

|   |   |   |   |   |   |     |     |     |
|---|---|---|---|---|---|-----|-----|-----|
| 1 | 1 | 1 | 0 | 1 | 0 | 152 | 7.5 | 165 |
| 1 | 1 | 1 | 0 | 1 | 0 | 153 | 7.5 | 165 |
| 1 | 1 | 1 | 0 | 1 | 0 | 154 | 7.5 | 165 |
| 1 | 1 | 1 | 0 | 1 | 0 | 155 | 7.5 | 165 |
| 1 | 1 | 1 | 0 | 1 | 0 | 156 | 7.5 | 165 |
| 1 | 1 | 1 | 0 | 1 | 0 | 157 | 7.5 | 165 |
| 1 | 1 | 1 | 0 | 1 | 0 | 158 | 7.5 | 165 |
| 1 | 1 | 1 | 0 | 1 | 0 | 159 | 7.5 | 165 |
| 1 | 1 | 1 | 0 | 1 | 0 | 160 | 7.5 | 165 |
| 1 | 1 | 1 | 0 | 1 | 0 | 161 | 7.5 | 165 |
| 1 | 1 | 1 | 0 | 1 | 0 | 162 | 7.5 | 165 |
| 1 | 1 | 1 | 0 | 1 | 0 | 163 | 7.5 | 165 |
| 1 | 1 | 1 | 0 | 1 | 0 | 164 | 7.5 | 165 |
| 1 | 1 | 1 | 0 | 1 | 0 | 165 | 7.5 | 165 |
| 1 | 1 | 1 | 0 | 1 | 0 | 166 | 7.5 | 165 |
| 1 | 1 | 1 | 0 | 1 | 0 | 167 | 7.5 | 165 |
| 1 | 1 | 1 | 0 | 1 | 0 | 168 | 7.5 | 165 |
| 1 | 1 | 1 | 0 | 1 | 0 | 169 | 7.5 | 165 |
| 1 | 1 | 1 | 0 | 1 | 0 | 170 | 7.5 | 165 |
| 1 | 1 | 1 | 0 | 1 | 0 | 171 | 7.5 | 165 |
| 1 | 1 | 1 | 0 | 1 | 0 | 172 | 7.5 | 165 |
| 1 | 1 | 1 | 0 | 1 | 0 | 173 | 7.5 | 165 |
| 1 | 1 | 1 | 0 | 1 | 0 | 174 | 7.5 | 165 |
| 1 | 1 | 1 | 0 | 1 | 0 | 175 | 7.5 | 165 |
| 1 | 1 | 1 | 0 | 1 | 0 | 176 | 7.5 | 165 |
| 1 | 1 | 1 | 0 | 1 | 0 | 177 | 7.5 | 165 |
| 1 | 1 | 1 | 0 | 1 | 0 | 178 | 7.5 | 165 |
| 1 | 1 | 1 | 0 | 1 | 0 | 179 | 7.5 | 165 |
| 1 | 1 | 1 | 0 | 1 | 0 | 180 | 7.5 | 180 |
| 1 | 1 | 1 | 0 | 0 | 1 | 0   | 7.5 | 105 |
| 1 | 1 | 1 | 0 | 0 | 1 | 1   | 7.5 | 105 |
| 1 | 1 | 1 | 0 | 0 | 1 | 2   | 7.5 | 105 |
| 1 | 1 | 1 | 0 | 0 | 1 | 3   | 7.5 | 105 |
| 1 | 1 | 1 | 0 | 0 | 1 | 4   | 7.5 | 105 |
| 1 | 1 | 1 | 0 | 0 | 1 | 5   | 7.5 | 105 |
| 1 | 1 | 1 | 0 | 0 | 1 | 6   | 7.5 | 105 |
| 1 | 1 | 1 | 0 | 0 | 1 | 7   | 7.5 | 105 |
| 1 | 1 | 1 | 0 | 0 | 1 | 8   | 7.5 | 105 |
| 1 | 1 | 1 | 0 | 0 | 1 | 9   | 7.5 | 105 |
| 1 | 1 | 1 | 0 | 0 | 1 | 10  | 7.5 | 105 |
| 1 | 1 | 1 | 0 | 0 | 1 | 11  | 7.5 | 105 |
| 1 | 1 | 1 | 0 | 0 | 1 | 12  | 7.5 | 105 |
| 1 | 1 | 1 | 0 | 0 | 1 | 13  | 7.5 | 105 |
| 1 | 1 | 1 | 0 | 0 | 1 | 14  | 7.5 | 105 |
| 1 | 1 | 1 | 0 | 0 | 1 | 15  | 7.5 | 105 |
| 1 | 1 | 1 | 0 | 0 | 1 | 16  | 7.5 | 105 |

|   |   |   |   |   |   |    |     |     |
|---|---|---|---|---|---|----|-----|-----|
| 1 | 1 | 1 | 0 | 0 | 1 | 17 | 7.5 | 105 |
| 1 | 1 | 1 | 0 | 0 | 1 | 18 | 7.5 | 105 |
| 1 | 1 | 1 | 0 | 0 | 1 | 19 | 7.5 | 105 |
| 1 | 1 | 1 | 0 | 0 | 1 | 20 | 7.5 | 105 |
| 1 | 1 | 1 | 0 | 0 | 1 | 21 | 7.5 | 105 |
| 1 | 1 | 1 | 0 | 0 | 1 | 22 | 7.5 | 105 |
| 1 | 1 | 1 | 0 | 0 | 1 | 23 | 7.5 | 105 |
| 1 | 1 | 1 | 0 | 0 | 1 | 24 | 7.5 | 105 |
| 1 | 1 | 1 | 0 | 0 | 1 | 25 | 7.5 | 105 |
| 1 | 1 | 1 | 0 | 0 | 1 | 26 | 7.5 | 105 |
| 1 | 1 | 1 | 0 | 0 | 1 | 27 | 7.5 | 105 |
| 1 | 1 | 1 | 0 | 0 | 1 | 28 | 7.5 | 105 |
| 1 | 1 | 1 | 0 | 0 | 1 | 29 | 7.5 | 105 |
| 1 | 1 | 1 | 0 | 0 | 1 | 30 | 7.5 | 105 |
| 1 | 1 | 1 | 0 | 0 | 1 | 31 | 7.5 | 105 |
| 1 | 1 | 1 | 0 | 0 | 1 | 32 | 7.5 | 105 |
| 1 | 1 | 1 | 0 | 0 | 1 | 33 | 7.5 | 105 |
| 1 | 1 | 1 | 0 | 0 | 1 | 34 | 7.5 | 105 |
| 1 | 1 | 1 | 0 | 0 | 1 | 35 | 7.5 | 105 |
| 1 | 1 | 1 | 0 | 0 | 1 | 36 | 7.5 | 105 |
| 1 | 1 | 1 | 0 | 0 | 1 | 37 | 7.5 | 105 |
| 1 | 1 | 1 | 0 | 0 | 1 | 38 | 7.5 | 105 |
| 1 | 1 | 1 | 0 | 0 | 1 | 39 | 7.5 | 105 |
| 1 | 1 | 1 | 0 | 0 | 1 | 40 | 7.5 | 105 |
| 1 | 1 | 1 | 0 | 0 | 1 | 41 | 7.5 | 105 |
| 1 | 1 | 1 | 0 | 0 | 1 | 42 | 7.5 | 105 |
| 1 | 1 | 1 | 0 | 0 | 1 | 43 | 7.5 | 105 |
| 1 | 1 | 1 | 0 | 0 | 1 | 44 | 7.5 | 105 |
| 1 | 1 | 1 | 0 | 0 | 1 | 45 | 7.5 | 105 |
| 1 | 1 | 1 | 0 | 0 | 1 | 46 | 7.5 | 105 |
| 1 | 1 | 1 | 0 | 0 | 1 | 47 | 7.5 | 105 |
| 1 | 1 | 1 | 0 | 0 | 1 | 48 | 7.5 | 105 |
| 1 | 1 | 1 | 0 | 0 | 1 | 49 | 7.5 | 105 |
| 1 | 1 | 1 | 0 | 0 | 1 | 50 | 7.5 | 105 |
| 1 | 1 | 1 | 0 | 0 | 1 | 51 | 7.5 | 105 |
| 1 | 1 | 1 | 0 | 0 | 1 | 52 | 7.5 | 105 |
| 1 | 1 | 1 | 0 | 0 | 1 | 53 | 7.5 | 105 |
| 1 | 1 | 1 | 0 | 0 | 1 | 54 | 7.5 | 105 |
| 1 | 1 | 1 | 0 | 0 | 1 | 55 | 7.5 | 105 |
| 1 | 1 | 1 | 0 | 0 | 1 | 56 | 7.5 | 105 |
| 1 | 1 | 1 | 0 | 0 | 1 | 57 | 7.5 | 105 |
| 1 | 1 | 1 | 0 | 0 | 1 | 58 | 7.5 | 105 |
| 1 | 1 | 1 | 0 | 0 | 1 | 59 | 7.5 | 105 |
| 1 | 1 | 1 | 0 | 0 | 1 | 60 | 7.5 | 105 |
| 1 | 1 | 1 | 0 | 0 | 1 | 61 | 7.5 | 105 |
| 1 | 1 | 1 | 0 | 0 | 1 | 62 | 7.5 | 105 |

|   |   |   |   |   |   |     |     |     |
|---|---|---|---|---|---|-----|-----|-----|
| 1 | 1 | 1 | 0 | 0 | 1 | 63  | 7.5 | 105 |
| 1 | 1 | 1 | 0 | 0 | 1 | 64  | 7.5 | 105 |
| 1 | 1 | 1 | 0 | 0 | 1 | 65  | 7.5 | 105 |
| 1 | 1 | 1 | 0 | 0 | 1 | 66  | 7.5 | 105 |
| 1 | 1 | 1 | 0 | 0 | 1 | 67  | 7.5 | 105 |
| 1 | 1 | 1 | 0 | 0 | 1 | 68  | 7.5 | 105 |
| 1 | 1 | 1 | 0 | 0 | 1 | 69  | 7.5 | 105 |
| 1 | 1 | 1 | 0 | 0 | 1 | 70  | 7.5 | 105 |
| 1 | 1 | 1 | 0 | 0 | 1 | 71  | 7.5 | 105 |
| 1 | 1 | 1 | 0 | 0 | 1 | 72  | 7.5 | 105 |
| 1 | 1 | 1 | 0 | 0 | 1 | 73  | 7.5 | 105 |
| 1 | 1 | 1 | 0 | 0 | 1 | 74  | 7.5 | 105 |
| 1 | 1 | 1 | 0 | 0 | 1 | 75  | 7.5 | 105 |
| 1 | 1 | 1 | 0 | 0 | 1 | 76  | 7.5 | 105 |
| 1 | 1 | 1 | 0 | 0 | 1 | 77  | 7.5 | 105 |
| 1 | 1 | 1 | 0 | 0 | 1 | 78  | 7.5 | 105 |
| 1 | 1 | 1 | 0 | 0 | 1 | 79  | 7.5 | 105 |
| 1 | 1 | 1 | 0 | 0 | 1 | 80  | 7.5 | 105 |
| 1 | 1 | 1 | 0 | 0 | 1 | 81  | 7.5 | 105 |
| 1 | 1 | 1 | 0 | 0 | 1 | 82  | 7.5 | 105 |
| 1 | 1 | 1 | 0 | 0 | 1 | 83  | 7.5 | 105 |
| 1 | 1 | 1 | 0 | 0 | 1 | 84  | 7.5 | 105 |
| 1 | 1 | 1 | 0 | 0 | 1 | 85  | 7.5 | 105 |
| 1 | 1 | 1 | 0 | 0 | 1 | 86  | 7.5 | 105 |
| 1 | 1 | 1 | 0 | 0 | 1 | 87  | 7.5 | 105 |
| 1 | 1 | 1 | 0 | 0 | 1 | 88  | 7.5 | 105 |
| 1 | 1 | 1 | 0 | 0 | 1 | 89  | 7.5 | 105 |
| 1 | 1 | 1 | 0 | 0 | 1 | 90  | 7.5 | 105 |
| 1 | 1 | 1 | 0 | 0 | 1 | 91  | 7.5 | 105 |
| 1 | 1 | 1 | 0 | 0 | 1 | 92  | 7.5 | 105 |
| 1 | 1 | 1 | 0 | 0 | 1 | 93  | 7.5 | 105 |
| 1 | 1 | 1 | 0 | 0 | 1 | 94  | 7.5 | 105 |
| 1 | 1 | 1 | 0 | 0 | 1 | 95  | 7.5 | 105 |
| 1 | 1 | 1 | 0 | 0 | 1 | 96  | 7.5 | 105 |
| 1 | 1 | 1 | 0 | 0 | 1 | 97  | 7.5 | 105 |
| 1 | 1 | 1 | 0 | 0 | 1 | 98  | 7.5 | 105 |
| 1 | 1 | 1 | 0 | 0 | 1 | 99  | 7.5 | 105 |
| 1 | 1 | 1 | 0 | 0 | 1 | 100 | 7.5 | 105 |
| 1 | 1 | 1 | 0 | 0 | 1 | 101 | 7.5 | 105 |
| 1 | 1 | 1 | 0 | 0 | 1 | 102 | 7.5 | 105 |
| 1 | 1 | 1 | 0 | 0 | 1 | 103 | 7.5 | 105 |
| 1 | 1 | 1 | 0 | 0 | 1 | 104 | 7.5 | 105 |
| 1 | 1 | 1 | 0 | 0 | 1 | 105 | 7.5 | 105 |
| 1 | 1 | 1 | 0 | 0 | 1 | 106 | 7.5 | 105 |
| 1 | 1 | 1 | 0 | 0 | 1 | 107 | 7.5 | 105 |
| 1 | 1 | 1 | 0 | 0 | 1 | 108 | 7.5 | 105 |

|   |   |   |   |   |   |     |     |     |
|---|---|---|---|---|---|-----|-----|-----|
| 1 | 1 | 1 | 0 | 0 | 1 | 109 | 7.5 | 105 |
| 1 | 1 | 1 | 0 | 0 | 1 | 110 | 7.5 | 105 |
| 1 | 1 | 1 | 0 | 0 | 1 | 111 | 7.5 | 105 |
| 1 | 1 | 1 | 0 | 0 | 1 | 112 | 7.5 | 105 |
| 1 | 1 | 1 | 0 | 0 | 1 | 113 | 7.5 | 105 |
| 1 | 1 | 1 | 0 | 0 | 1 | 114 | 7.5 | 105 |
| 1 | 1 | 1 | 0 | 0 | 1 | 115 | 7.5 | 105 |
| 1 | 1 | 1 | 0 | 0 | 1 | 116 | 7.5 | 105 |
| 1 | 1 | 1 | 0 | 0 | 1 | 117 | 7.5 | 105 |
| 1 | 1 | 1 | 0 | 0 | 1 | 118 | 7.5 | 105 |
| 1 | 1 | 1 | 0 | 0 | 1 | 119 | 7.5 | 105 |
| 1 | 1 | 1 | 0 | 0 | 1 | 120 | 7.5 | 120 |
| 1 | 1 | 1 | 0 | 0 | 1 | 121 | 7.5 | 135 |
| 1 | 1 | 1 | 0 | 0 | 1 | 122 | 7.5 | 135 |
| 1 | 1 | 1 | 0 | 0 | 1 | 123 | 7.5 | 135 |
| 1 | 1 | 1 | 0 | 0 | 1 | 124 | 7.5 | 135 |
| 1 | 1 | 1 | 0 | 0 | 1 | 125 | 7.5 | 135 |
| 1 | 1 | 1 | 0 | 0 | 1 | 126 | 7.5 | 135 |
| 1 | 1 | 1 | 0 | 0 | 1 | 127 | 7.5 | 135 |
| 1 | 1 | 1 | 0 | 0 | 1 | 128 | 7.5 | 135 |
| 1 | 1 | 1 | 0 | 0 | 1 | 129 | 7.5 | 135 |
| 1 | 1 | 1 | 0 | 0 | 1 | 130 | 7.5 | 135 |
| 1 | 1 | 1 | 0 | 0 | 1 | 131 | 7.5 | 135 |
| 1 | 1 | 1 | 0 | 0 | 1 | 132 | 7.5 | 135 |
| 1 | 1 | 1 | 0 | 0 | 1 | 133 | 7.5 | 135 |
| 1 | 1 | 1 | 0 | 0 | 1 | 134 | 7.5 | 135 |
| 1 | 1 | 1 | 0 | 0 | 1 | 135 | 7.5 | 135 |
| 1 | 1 | 1 | 0 | 0 | 1 | 136 | 7.5 | 135 |
| 1 | 1 | 1 | 0 | 0 | 1 | 137 | 7.5 | 135 |
| 1 | 1 | 1 | 0 | 0 | 1 | 138 | 7.5 | 135 |
| 1 | 1 | 1 | 0 | 0 | 1 | 139 | 7.5 | 135 |
| 1 | 1 | 1 | 0 | 0 | 1 | 140 | 7.5 | 135 |
| 1 | 1 | 1 | 0 | 0 | 1 | 141 | 7.5 | 135 |
| 1 | 1 | 1 | 0 | 0 | 1 | 142 | 7.5 | 135 |
| 1 | 1 | 1 | 0 | 0 | 1 | 143 | 7.5 | 135 |
| 1 | 1 | 1 | 0 | 0 | 1 | 144 | 7.5 | 135 |
| 1 | 1 | 1 | 0 | 0 | 1 | 145 | 7.5 | 135 |
| 1 | 1 | 1 | 0 | 0 | 1 | 146 | 7.5 | 135 |
| 1 | 1 | 1 | 0 | 0 | 1 | 147 | 7.5 | 135 |
| 1 | 1 | 1 | 0 | 0 | 1 | 148 | 7.5 | 135 |
| 1 | 1 | 1 | 0 | 0 | 1 | 149 | 7.5 | 135 |
| 1 | 1 | 1 | 0 | 0 | 1 | 150 | 7.5 | 135 |
| 1 | 1 | 1 | 0 | 0 | 1 | 151 | 7.5 | 135 |
| 1 | 1 | 1 | 0 | 0 | 1 | 152 | 7.5 | 135 |
| 1 | 1 | 1 | 0 | 0 | 1 | 153 | 7.5 | 135 |
| 1 | 1 | 1 | 0 | 0 | 1 | 154 | 7.5 | 135 |

|   |   |   |   |   |   |     |     |     |
|---|---|---|---|---|---|-----|-----|-----|
| 1 | 1 | 1 | 0 | 0 | 1 | 155 | 7.5 | 135 |
| 1 | 1 | 1 | 0 | 0 | 1 | 156 | 7.5 | 135 |
| 1 | 1 | 1 | 0 | 0 | 1 | 157 | 7.5 | 135 |
| 1 | 1 | 1 | 0 | 0 | 1 | 158 | 7.5 | 135 |
| 1 | 1 | 1 | 0 | 0 | 1 | 159 | 7.5 | 135 |
| 1 | 1 | 1 | 0 | 0 | 1 | 160 | 7.5 | 135 |
| 1 | 1 | 1 | 0 | 0 | 1 | 161 | 7.5 | 135 |
| 1 | 1 | 1 | 0 | 0 | 1 | 162 | 7.5 | 135 |
| 1 | 1 | 1 | 0 | 0 | 1 | 163 | 7.5 | 135 |
| 1 | 1 | 1 | 0 | 0 | 1 | 164 | 7.5 | 135 |
| 1 | 1 | 1 | 0 | 0 | 1 | 165 | 7.5 | 135 |
| 1 | 1 | 1 | 0 | 0 | 1 | 166 | 7.5 | 135 |
| 1 | 1 | 1 | 0 | 0 | 1 | 167 | 7.5 | 135 |
| 1 | 1 | 1 | 0 | 0 | 1 | 168 | 7.5 | 135 |
| 1 | 1 | 1 | 0 | 0 | 1 | 169 | 7.5 | 135 |
| 1 | 1 | 1 | 0 | 0 | 1 | 170 | 7.5 | 135 |
| 1 | 1 | 1 | 0 | 0 | 1 | 171 | 7.5 | 135 |
| 1 | 1 | 1 | 0 | 0 | 1 | 172 | 7.5 | 135 |
| 1 | 1 | 1 | 0 | 0 | 1 | 173 | 7.5 | 135 |
| 1 | 1 | 1 | 0 | 0 | 1 | 174 | 7.5 | 135 |
| 1 | 1 | 1 | 0 | 0 | 1 | 175 | 7.5 | 135 |
| 1 | 1 | 1 | 0 | 0 | 1 | 176 | 7.5 | 135 |
| 1 | 1 | 1 | 0 | 0 | 1 | 177 | 7.5 | 135 |
| 1 | 1 | 1 | 0 | 0 | 1 | 178 | 7.5 | 135 |
| 1 | 1 | 1 | 0 | 0 | 1 | 179 | 7.5 | 135 |
| 1 | 1 | 1 | 0 | 0 | 1 | 180 | 7.5 | 135 |
| 1 | 1 | 0 | 1 | 1 | 0 | 0   | 7.5 | 75  |
| 1 | 1 | 0 | 1 | 1 | 0 | 1   | 7.5 | 75  |
| 1 | 1 | 0 | 1 | 1 | 0 | 2   | 7.5 | 75  |
| 1 | 1 | 0 | 1 | 1 | 0 | 3   | 7.5 | 75  |
| 1 | 1 | 0 | 1 | 1 | 0 | 4   | 7.5 | 75  |
| 1 | 1 | 0 | 1 | 1 | 0 | 5   | 7.5 | 75  |
| 1 | 1 | 0 | 1 | 1 | 0 | 6   | 7.5 | 75  |
| 1 | 1 | 0 | 1 | 1 | 0 | 7   | 7.5 | 75  |
| 1 | 1 | 0 | 1 | 1 | 0 | 8   | 7.5 | 75  |
| 1 | 1 | 0 | 1 | 1 | 0 | 9   | 7.5 | 75  |
| 1 | 1 | 0 | 1 | 1 | 0 | 10  | 7.5 | 75  |
| 1 | 1 | 0 | 1 | 1 | 0 | 11  | 7.5 | 75  |
| 1 | 1 | 0 | 1 | 1 | 0 | 12  | 7.5 | 75  |
| 1 | 1 | 0 | 1 | 1 | 0 | 13  | 7.5 | 75  |
| 1 | 1 | 0 | 1 | 1 | 0 | 14  | 7.5 | 75  |
| 1 | 1 | 0 | 1 | 1 | 0 | 15  | 7.5 | 75  |
| 1 | 1 | 0 | 1 | 1 | 0 | 16  | 7.5 | 75  |
| 1 | 1 | 0 | 1 | 1 | 0 | 17  | 7.5 | 75  |
| 1 | 1 | 0 | 1 | 1 | 0 | 18  | 7.5 | 75  |
| 1 | 1 | 0 | 1 | 1 | 0 | 19  | 7.5 | 75  |

|   |   |   |   |   |   |    |     |    |
|---|---|---|---|---|---|----|-----|----|
| 1 | 1 | 0 | 1 | 1 | 0 | 20 | 7.5 | 75 |
| 1 | 1 | 0 | 1 | 1 | 0 | 21 | 7.5 | 75 |
| 1 | 1 | 0 | 1 | 1 | 0 | 22 | 7.5 | 75 |
| 1 | 1 | 0 | 1 | 1 | 0 | 23 | 7.5 | 75 |
| 1 | 1 | 0 | 1 | 1 | 0 | 24 | 7.5 | 75 |
| 1 | 1 | 0 | 1 | 1 | 0 | 25 | 7.5 | 75 |
| 1 | 1 | 0 | 1 | 1 | 0 | 26 | 7.5 | 75 |
| 1 | 1 | 0 | 1 | 1 | 0 | 27 | 7.5 | 75 |
| 1 | 1 | 0 | 1 | 1 | 0 | 28 | 7.5 | 75 |
| 1 | 1 | 0 | 1 | 1 | 0 | 29 | 7.5 | 75 |
| 1 | 1 | 0 | 1 | 1 | 0 | 30 | 7.5 | 75 |
| 1 | 1 | 0 | 1 | 1 | 0 | 31 | 7.5 | 75 |
| 1 | 1 | 0 | 1 | 1 | 0 | 32 | 7.5 | 75 |
| 1 | 1 | 0 | 1 | 1 | 0 | 33 | 7.5 | 75 |
| 1 | 1 | 0 | 1 | 1 | 0 | 34 | 7.5 | 75 |
| 1 | 1 | 0 | 1 | 1 | 0 | 35 | 7.5 | 75 |
| 1 | 1 | 0 | 1 | 1 | 0 | 36 | 7.5 | 75 |
| 1 | 1 | 0 | 1 | 1 | 0 | 37 | 7.5 | 75 |
| 1 | 1 | 0 | 1 | 1 | 0 | 38 | 7.5 | 75 |
| 1 | 1 | 0 | 1 | 1 | 0 | 39 | 7.5 | 75 |
| 1 | 1 | 0 | 1 | 1 | 0 | 40 | 7.5 | 75 |
| 1 | 1 | 0 | 1 | 1 | 0 | 41 | 7.5 | 75 |
| 1 | 1 | 0 | 1 | 1 | 0 | 42 | 7.5 | 75 |
| 1 | 1 | 0 | 1 | 1 | 0 | 43 | 7.5 | 75 |
| 1 | 1 | 0 | 1 | 1 | 0 | 44 | 7.5 | 75 |
| 1 | 1 | 0 | 1 | 1 | 0 | 45 | 7.5 | 75 |
| 1 | 1 | 0 | 1 | 1 | 0 | 46 | 7.5 | 75 |
| 1 | 1 | 0 | 1 | 1 | 0 | 47 | 7.5 | 75 |
| 1 | 1 | 0 | 1 | 1 | 0 | 48 | 7.5 | 75 |
| 1 | 1 | 0 | 1 | 1 | 0 | 49 | 7.5 | 75 |
| 1 | 1 | 0 | 1 | 1 | 0 | 50 | 7.5 | 75 |
| 1 | 1 | 0 | 1 | 1 | 0 | 51 | 7.5 | 75 |
| 1 | 1 | 0 | 1 | 1 | 0 | 52 | 7.5 | 75 |
| 1 | 1 | 0 | 1 | 1 | 0 | 53 | 7.5 | 75 |
| 1 | 1 | 0 | 1 | 1 | 0 | 54 | 7.5 | 75 |
| 1 | 1 | 0 | 1 | 1 | 0 | 55 | 7.5 | 75 |
| 1 | 1 | 0 | 1 | 1 | 0 | 56 | 7.5 | 75 |
| 1 | 1 | 0 | 1 | 1 | 0 | 57 | 7.5 | 75 |
| 1 | 1 | 0 | 1 | 1 | 0 | 58 | 7.5 | 75 |
| 1 | 1 | 0 | 1 | 1 | 0 | 59 | 7.5 | 75 |
| 1 | 1 | 0 | 1 | 1 | 0 | 60 | 7.5 | 75 |
| 1 | 1 | 0 | 1 | 1 | 0 | 61 | 7.5 | 75 |
| 1 | 1 | 0 | 1 | 1 | 0 | 62 | 7.5 | 75 |
| 1 | 1 | 0 | 1 | 1 | 0 | 63 | 7.5 | 75 |
| 1 | 1 | 0 | 1 | 1 | 0 | 64 | 7.5 | 75 |
| 1 | 1 | 0 | 1 | 1 | 0 | 65 | 7.5 | 75 |

|   |   |   |   |   |   |     |     |    |
|---|---|---|---|---|---|-----|-----|----|
| 1 | 1 | 0 | 1 | 1 | 0 | 66  | 7.5 | 75 |
| 1 | 1 | 0 | 1 | 1 | 0 | 67  | 7.5 | 75 |
| 1 | 1 | 0 | 1 | 1 | 0 | 68  | 7.5 | 75 |
| 1 | 1 | 0 | 1 | 1 | 0 | 69  | 7.5 | 75 |
| 1 | 1 | 0 | 1 | 1 | 0 | 70  | 7.5 | 75 |
| 1 | 1 | 0 | 1 | 1 | 0 | 71  | 7.5 | 75 |
| 1 | 1 | 0 | 1 | 1 | 0 | 72  | 7.5 | 75 |
| 1 | 1 | 0 | 1 | 1 | 0 | 73  | 7.5 | 75 |
| 1 | 1 | 0 | 1 | 1 | 0 | 74  | 7.5 | 75 |
| 1 | 1 | 0 | 1 | 1 | 0 | 75  | 7.5 | 75 |
| 1 | 1 | 0 | 1 | 1 | 0 | 76  | 7.5 | 75 |
| 1 | 1 | 0 | 1 | 1 | 0 | 77  | 7.5 | 75 |
| 1 | 1 | 0 | 1 | 1 | 0 | 78  | 7.5 | 75 |
| 1 | 1 | 0 | 1 | 1 | 0 | 79  | 7.5 | 75 |
| 1 | 1 | 0 | 1 | 1 | 0 | 80  | 7.5 | 75 |
| 1 | 1 | 0 | 1 | 1 | 0 | 81  | 7.5 | 75 |
| 1 | 1 | 0 | 1 | 1 | 0 | 82  | 7.5 | 75 |
| 1 | 1 | 0 | 1 | 1 | 0 | 83  | 7.5 | 75 |
| 1 | 1 | 0 | 1 | 1 | 0 | 84  | 7.5 | 75 |
| 1 | 1 | 0 | 1 | 1 | 0 | 85  | 7.5 | 75 |
| 1 | 1 | 0 | 1 | 1 | 0 | 86  | 7.5 | 75 |
| 1 | 1 | 0 | 1 | 1 | 0 | 87  | 7.5 | 75 |
| 1 | 1 | 0 | 1 | 1 | 0 | 88  | 7.5 | 75 |
| 1 | 1 | 0 | 1 | 1 | 0 | 89  | 7.5 | 75 |
| 1 | 1 | 0 | 1 | 1 | 0 | 90  | 7.5 | 75 |
| 1 | 1 | 0 | 1 | 1 | 0 | 91  | 7.5 | 75 |
| 1 | 1 | 0 | 1 | 1 | 0 | 92  | 7.5 | 75 |
| 1 | 1 | 0 | 1 | 1 | 0 | 93  | 7.5 | 75 |
| 1 | 1 | 0 | 1 | 1 | 0 | 94  | 7.5 | 75 |
| 1 | 1 | 0 | 1 | 1 | 0 | 95  | 7.5 | 75 |
| 1 | 1 | 0 | 1 | 1 | 0 | 96  | 7.5 | 75 |
| 1 | 1 | 0 | 1 | 1 | 0 | 97  | 7.5 | 75 |
| 1 | 1 | 0 | 1 | 1 | 0 | 98  | 7.5 | 75 |
| 1 | 1 | 0 | 1 | 1 | 0 | 99  | 7.5 | 75 |
| 1 | 1 | 0 | 1 | 1 | 0 | 100 | 7.5 | 75 |
| 1 | 1 | 0 | 1 | 1 | 0 | 101 | 7.5 | 75 |
| 1 | 1 | 0 | 1 | 1 | 0 | 102 | 7.5 | 75 |
| 1 | 1 | 0 | 1 | 1 | 0 | 103 | 7.5 | 75 |
| 1 | 1 | 0 | 1 | 1 | 0 | 104 | 7.5 | 75 |
| 1 | 1 | 0 | 1 | 1 | 0 | 105 | 7.5 | 75 |
| 1 | 1 | 0 | 1 | 1 | 0 | 106 | 7.5 | 75 |
| 1 | 1 | 0 | 1 | 1 | 0 | 107 | 7.5 | 75 |
| 1 | 1 | 0 | 1 | 1 | 0 | 108 | 7.5 | 75 |
| 1 | 1 | 0 | 1 | 1 | 0 | 109 | 7.5 | 75 |
| 1 | 1 | 0 | 1 | 1 | 0 | 110 | 7.5 | 75 |
| 1 | 1 | 0 | 1 | 1 | 0 | 111 | 7.5 | 75 |

|   |   |   |   |   |   |     |     |     |
|---|---|---|---|---|---|-----|-----|-----|
| 1 | 1 | 0 | 1 | 1 | 0 | 112 | 7.5 | 75  |
| 1 | 1 | 0 | 1 | 1 | 0 | 113 | 7.5 | 75  |
| 1 | 1 | 0 | 1 | 1 | 0 | 114 | 7.5 | 75  |
| 1 | 1 | 0 | 1 | 1 | 0 | 115 | 7.5 | 75  |
| 1 | 1 | 0 | 1 | 1 | 0 | 116 | 7.5 | 75  |
| 1 | 1 | 0 | 1 | 1 | 0 | 117 | 7.5 | 75  |
| 1 | 1 | 0 | 1 | 1 | 0 | 118 | 7.5 | 75  |
| 1 | 1 | 0 | 1 | 1 | 0 | 119 | 7.5 | 75  |
| 1 | 1 | 0 | 1 | 1 | 0 | 120 | 7.5 | 165 |
| 1 | 1 | 0 | 1 | 1 | 0 | 121 | 7.5 | 165 |
| 1 | 1 | 0 | 1 | 1 | 0 | 122 | 7.5 | 165 |
| 1 | 1 | 0 | 1 | 1 | 0 | 123 | 7.5 | 165 |
| 1 | 1 | 0 | 1 | 1 | 0 | 124 | 7.5 | 165 |
| 1 | 1 | 0 | 1 | 1 | 0 | 125 | 7.5 | 165 |
| 1 | 1 | 0 | 1 | 1 | 0 | 126 | 7.5 | 165 |
| 1 | 1 | 0 | 1 | 1 | 0 | 127 | 7.5 | 165 |
| 1 | 1 | 0 | 1 | 1 | 0 | 128 | 7.5 | 165 |
| 1 | 1 | 0 | 1 | 1 | 0 | 129 | 7.5 | 165 |
| 1 | 1 | 0 | 1 | 1 | 0 | 130 | 7.5 | 165 |
| 1 | 1 | 0 | 1 | 1 | 0 | 131 | 7.5 | 165 |
| 1 | 1 | 0 | 1 | 1 | 0 | 132 | 7.5 | 165 |
| 1 | 1 | 0 | 1 | 1 | 0 | 133 | 7.5 | 165 |
| 1 | 1 | 0 | 1 | 1 | 0 | 134 | 7.5 | 165 |
| 1 | 1 | 0 | 1 | 1 | 0 | 135 | 7.5 | 165 |
| 1 | 1 | 0 | 1 | 1 | 0 | 136 | 7.5 | 165 |
| 1 | 1 | 0 | 1 | 1 | 0 | 137 | 7.5 | 165 |
| 1 | 1 | 0 | 1 | 1 | 0 | 138 | 7.5 | 165 |
| 1 | 1 | 0 | 1 | 1 | 0 | 139 | 7.5 | 165 |
| 1 | 1 | 0 | 1 | 1 | 0 | 140 | 7.5 | 165 |
| 1 | 1 | 0 | 1 | 1 | 0 | 141 | 7.5 | 165 |
| 1 | 1 | 0 | 1 | 1 | 0 | 142 | 7.5 | 165 |
| 1 | 1 | 0 | 1 | 1 | 0 | 143 | 7.5 | 165 |
| 1 | 1 | 0 | 1 | 1 | 0 | 144 | 7.5 | 165 |
| 1 | 1 | 0 | 1 | 1 | 0 | 145 | 7.5 | 165 |
| 1 | 1 | 0 | 1 | 1 | 0 | 146 | 7.5 | 165 |
| 1 | 1 | 0 | 1 | 1 | 0 | 147 | 7.5 | 165 |
| 1 | 1 | 0 | 1 | 1 | 0 | 148 | 7.5 | 165 |
| 1 | 1 | 0 | 1 | 1 | 0 | 149 | 7.5 | 165 |
| 1 | 1 | 0 | 1 | 1 | 0 | 150 | 7.5 | 165 |
| 1 | 1 | 0 | 1 | 1 | 0 | 151 | 7.5 | 165 |
| 1 | 1 | 0 | 1 | 1 | 0 | 152 | 7.5 | 165 |
| 1 | 1 | 0 | 1 | 1 | 0 | 153 | 7.5 | 165 |
| 1 | 1 | 0 | 1 | 1 | 0 | 154 | 7.5 | 165 |
| 1 | 1 | 0 | 1 | 1 | 0 | 155 | 7.5 | 165 |
| 1 | 1 | 0 | 1 | 1 | 0 | 156 | 7.5 | 165 |
| 1 | 1 | 0 | 1 | 1 | 0 | 157 | 7.5 | 165 |

|   |   |   |   |   |   |     |     |     |
|---|---|---|---|---|---|-----|-----|-----|
| 1 | 1 | 0 | 1 | 1 | 0 | 158 | 7.5 | 165 |
| 1 | 1 | 0 | 1 | 1 | 0 | 159 | 7.5 | 165 |
| 1 | 1 | 0 | 1 | 1 | 0 | 160 | 7.5 | 165 |
| 1 | 1 | 0 | 1 | 1 | 0 | 161 | 7.5 | 165 |
| 1 | 1 | 0 | 1 | 1 | 0 | 162 | 7.5 | 165 |
| 1 | 1 | 0 | 1 | 1 | 0 | 163 | 7.5 | 165 |
| 1 | 1 | 0 | 1 | 1 | 0 | 164 | 7.5 | 165 |
| 1 | 1 | 0 | 1 | 1 | 0 | 165 | 7.5 | 165 |
| 1 | 1 | 0 | 1 | 1 | 0 | 166 | 7.5 | 165 |
| 1 | 1 | 0 | 1 | 1 | 0 | 167 | 7.5 | 165 |
| 1 | 1 | 0 | 1 | 1 | 0 | 168 | 7.5 | 165 |
| 1 | 1 | 0 | 1 | 1 | 0 | 169 | 7.5 | 165 |
| 1 | 1 | 0 | 1 | 1 | 0 | 170 | 7.5 | 165 |
| 1 | 1 | 0 | 1 | 1 | 0 | 171 | 7.5 | 165 |
| 1 | 1 | 0 | 1 | 1 | 0 | 172 | 7.5 | 165 |
| 1 | 1 | 0 | 1 | 1 | 0 | 173 | 7.5 | 165 |
| 1 | 1 | 0 | 1 | 1 | 0 | 174 | 7.5 | 165 |
| 1 | 1 | 0 | 1 | 1 | 0 | 175 | 7.5 | 165 |
| 1 | 1 | 0 | 1 | 1 | 0 | 176 | 7.5 | 165 |
| 1 | 1 | 0 | 1 | 1 | 0 | 177 | 7.5 | 165 |
| 1 | 1 | 0 | 1 | 1 | 0 | 178 | 7.5 | 165 |
| 1 | 1 | 0 | 1 | 1 | 0 | 179 | 7.5 | 165 |
| 1 | 1 | 0 | 1 | 1 | 0 | 180 | 7.5 | 180 |
| 1 | 1 | 0 | 1 | 0 | 1 | 0   | 7.5 | 75  |
| 1 | 1 | 0 | 1 | 0 | 1 | 1   | 7.5 | 75  |
| 1 | 1 | 0 | 1 | 0 | 1 | 2   | 7.5 | 75  |
| 1 | 1 | 0 | 1 | 0 | 1 | 3   | 7.5 | 75  |
| 1 | 1 | 0 | 1 | 0 | 1 | 4   | 7.5 | 75  |
| 1 | 1 | 0 | 1 | 0 | 1 | 5   | 7.5 | 75  |
| 1 | 1 | 0 | 1 | 0 | 1 | 6   | 7.5 | 75  |
| 1 | 1 | 0 | 1 | 0 | 1 | 7   | 7.5 | 75  |
| 1 | 1 | 0 | 1 | 0 | 1 | 8   | 7.5 | 75  |
| 1 | 1 | 0 | 1 | 0 | 1 | 9   | 7.5 | 75  |
| 1 | 1 | 0 | 1 | 0 | 1 | 10  | 7.5 | 75  |
| 1 | 1 | 0 | 1 | 0 | 1 | 11  | 7.5 | 75  |
| 1 | 1 | 0 | 1 | 0 | 1 | 12  | 7.5 | 75  |
| 1 | 1 | 0 | 1 | 0 | 1 | 13  | 7.5 | 75  |
| 1 | 1 | 0 | 1 | 0 | 1 | 14  | 7.5 | 75  |
| 1 | 1 | 0 | 1 | 0 | 1 | 15  | 7.5 | 75  |
| 1 | 1 | 0 | 1 | 0 | 1 | 16  | 7.5 | 75  |
| 1 | 1 | 0 | 1 | 0 | 1 | 17  | 7.5 | 75  |
| 1 | 1 | 0 | 1 | 0 | 1 | 18  | 7.5 | 75  |
| 1 | 1 | 0 | 1 | 0 | 1 | 19  | 7.5 | 75  |
| 1 | 1 | 0 | 1 | 0 | 1 | 20  | 7.5 | 75  |
| 1 | 1 | 0 | 1 | 0 | 1 | 21  | 7.5 | 75  |
| 1 | 1 | 0 | 1 | 0 | 1 | 22  | 7.5 | 75  |

|   |   |   |   |   |   |    |     |    |
|---|---|---|---|---|---|----|-----|----|
| 1 | 1 | 0 | 1 | 0 | 1 | 23 | 7.5 | 75 |
| 1 | 1 | 0 | 1 | 0 | 1 | 24 | 7.5 | 75 |
| 1 | 1 | 0 | 1 | 0 | 1 | 25 | 7.5 | 75 |
| 1 | 1 | 0 | 1 | 0 | 1 | 26 | 7.5 | 75 |
| 1 | 1 | 0 | 1 | 0 | 1 | 27 | 7.5 | 75 |
| 1 | 1 | 0 | 1 | 0 | 1 | 28 | 7.5 | 75 |
| 1 | 1 | 0 | 1 | 0 | 1 | 29 | 7.5 | 75 |
| 1 | 1 | 0 | 1 | 0 | 1 | 30 | 7.5 | 75 |
| 1 | 1 | 0 | 1 | 0 | 1 | 31 | 7.5 | 75 |
| 1 | 1 | 0 | 1 | 0 | 1 | 32 | 7.5 | 75 |
| 1 | 1 | 0 | 1 | 0 | 1 | 33 | 7.5 | 75 |
| 1 | 1 | 0 | 1 | 0 | 1 | 34 | 7.5 | 75 |
| 1 | 1 | 0 | 1 | 0 | 1 | 35 | 7.5 | 75 |
| 1 | 1 | 0 | 1 | 0 | 1 | 36 | 7.5 | 75 |
| 1 | 1 | 0 | 1 | 0 | 1 | 37 | 7.5 | 75 |
| 1 | 1 | 0 | 1 | 0 | 1 | 38 | 7.5 | 75 |
| 1 | 1 | 0 | 1 | 0 | 1 | 39 | 7.5 | 75 |
| 1 | 1 | 0 | 1 | 0 | 1 | 40 | 7.5 | 75 |
| 1 | 1 | 0 | 1 | 0 | 1 | 41 | 7.5 | 75 |
| 1 | 1 | 0 | 1 | 0 | 1 | 42 | 7.5 | 75 |
| 1 | 1 | 0 | 1 | 0 | 1 | 43 | 7.5 | 75 |
| 1 | 1 | 0 | 1 | 0 | 1 | 44 | 7.5 | 75 |
| 1 | 1 | 0 | 1 | 0 | 1 | 45 | 7.5 | 75 |
| 1 | 1 | 0 | 1 | 0 | 1 | 46 | 7.5 | 75 |
| 1 | 1 | 0 | 1 | 0 | 1 | 47 | 7.5 | 75 |
| 1 | 1 | 0 | 1 | 0 | 1 | 48 | 7.5 | 75 |
| 1 | 1 | 0 | 1 | 0 | 1 | 49 | 7.5 | 75 |
| 1 | 1 | 0 | 1 | 0 | 1 | 50 | 7.5 | 75 |
| 1 | 1 | 0 | 1 | 0 | 1 | 51 | 7.5 | 75 |
| 1 | 1 | 0 | 1 | 0 | 1 | 52 | 7.5 | 75 |
| 1 | 1 | 0 | 1 | 0 | 1 | 53 | 7.5 | 75 |
| 1 | 1 | 0 | 1 | 0 | 1 | 54 | 7.5 | 75 |
| 1 | 1 | 0 | 1 | 0 | 1 | 55 | 7.5 | 75 |
| 1 | 1 | 0 | 1 | 0 | 1 | 56 | 7.5 | 75 |
| 1 | 1 | 0 | 1 | 0 | 1 | 57 | 7.5 | 75 |
| 1 | 1 | 0 | 1 | 0 | 1 | 58 | 7.5 | 75 |
| 1 | 1 | 0 | 1 | 0 | 1 | 59 | 7.5 | 75 |
| 1 | 1 | 0 | 1 | 0 | 1 | 60 | 7.5 | 75 |
| 1 | 1 | 0 | 1 | 0 | 1 | 61 | 7.5 | 75 |
| 1 | 1 | 0 | 1 | 0 | 1 | 62 | 7.5 | 75 |
| 1 | 1 | 0 | 1 | 0 | 1 | 63 | 7.5 | 75 |
| 1 | 1 | 0 | 1 | 0 | 1 | 64 | 7.5 | 75 |
| 1 | 1 | 0 | 1 | 0 | 1 | 65 | 7.5 | 75 |
| 1 | 1 | 0 | 1 | 0 | 1 | 66 | 7.5 | 75 |
| 1 | 1 | 0 | 1 | 0 | 1 | 67 | 7.5 | 75 |
| 1 | 1 | 0 | 1 | 0 | 1 | 68 | 7.5 | 75 |

|   |   |   |   |   |   |     |     |     |
|---|---|---|---|---|---|-----|-----|-----|
| 1 | 1 | 0 | 1 | 0 | 1 | 69  | 7.5 | 75  |
| 1 | 1 | 0 | 1 | 0 | 1 | 70  | 7.5 | 75  |
| 1 | 1 | 0 | 1 | 0 | 1 | 71  | 7.5 | 75  |
| 1 | 1 | 0 | 1 | 0 | 1 | 72  | 7.5 | 75  |
| 1 | 1 | 0 | 1 | 0 | 1 | 73  | 7.5 | 75  |
| 1 | 1 | 0 | 1 | 0 | 1 | 74  | 7.5 | 75  |
| 1 | 1 | 0 | 1 | 0 | 1 | 75  | 7.5 | 75  |
| 1 | 1 | 0 | 1 | 0 | 1 | 76  | 7.5 | 75  |
| 1 | 1 | 0 | 1 | 0 | 1 | 77  | 7.5 | 75  |
| 1 | 1 | 0 | 1 | 0 | 1 | 78  | 7.5 | 75  |
| 1 | 1 | 0 | 1 | 0 | 1 | 79  | 7.5 | 75  |
| 1 | 1 | 0 | 1 | 0 | 1 | 80  | 7.5 | 75  |
| 1 | 1 | 0 | 1 | 0 | 1 | 81  | 7.5 | 75  |
| 1 | 1 | 0 | 1 | 0 | 1 | 82  | 7.5 | 75  |
| 1 | 1 | 0 | 1 | 0 | 1 | 83  | 7.5 | 75  |
| 1 | 1 | 0 | 1 | 0 | 1 | 84  | 7.5 | 75  |
| 1 | 1 | 0 | 1 | 0 | 1 | 85  | 7.5 | 75  |
| 1 | 1 | 0 | 1 | 0 | 1 | 86  | 7.5 | 75  |
| 1 | 1 | 0 | 1 | 0 | 1 | 87  | 7.5 | 75  |
| 1 | 1 | 0 | 1 | 0 | 1 | 88  | 7.5 | 75  |
| 1 | 1 | 0 | 1 | 0 | 1 | 89  | 7.5 | 75  |
| 1 | 1 | 0 | 1 | 0 | 1 | 90  | 7.5 | 75  |
| 1 | 1 | 0 | 1 | 0 | 1 | 91  | 7.5 | 75  |
| 1 | 1 | 0 | 1 | 0 | 1 | 92  | 7.5 | 75  |
| 1 | 1 | 0 | 1 | 0 | 1 | 93  | 7.5 | 75  |
| 1 | 1 | 0 | 1 | 0 | 1 | 94  | 7.5 | 75  |
| 1 | 1 | 0 | 1 | 0 | 1 | 95  | 7.5 | 75  |
| 1 | 1 | 0 | 1 | 0 | 1 | 96  | 7.5 | 75  |
| 1 | 1 | 0 | 1 | 0 | 1 | 97  | 7.5 | 75  |
| 1 | 1 | 0 | 1 | 0 | 1 | 98  | 7.5 | 75  |
| 1 | 1 | 0 | 1 | 0 | 1 | 99  | 7.5 | 75  |
| 1 | 1 | 0 | 1 | 0 | 1 | 100 | 7.5 | 75  |
| 1 | 1 | 0 | 1 | 0 | 1 | 101 | 7.5 | 75  |
| 1 | 1 | 0 | 1 | 0 | 1 | 102 | 7.5 | 75  |
| 1 | 1 | 0 | 1 | 0 | 1 | 103 | 7.5 | 75  |
| 1 | 1 | 0 | 1 | 0 | 1 | 104 | 7.5 | 75  |
| 1 | 1 | 0 | 1 | 0 | 1 | 105 | 7.5 | 75  |
| 1 | 1 | 0 | 1 | 0 | 1 | 106 | 7.5 | 135 |
| 1 | 1 | 0 | 1 | 0 | 1 | 107 | 7.5 | 135 |
| 1 | 1 | 0 | 1 | 0 | 1 | 108 | 7.5 | 135 |
| 1 | 1 | 0 | 1 | 0 | 1 | 109 | 7.5 | 135 |
| 1 | 1 | 0 | 1 | 0 | 1 | 110 | 7.5 | 135 |
| 1 | 1 | 0 | 1 | 0 | 1 | 111 | 7.5 | 135 |
| 1 | 1 | 0 | 1 | 0 | 1 | 112 | 7.5 | 135 |
| 1 | 1 | 0 | 1 | 0 | 1 | 113 | 7.5 | 135 |
| 1 | 1 | 0 | 1 | 0 | 1 | 114 | 7.5 | 135 |

|   |   |   |   |   |   |     |     |     |
|---|---|---|---|---|---|-----|-----|-----|
| 1 | 1 | 0 | 1 | 0 | 1 | 115 | 7.5 | 135 |
| 1 | 1 | 0 | 1 | 0 | 1 | 116 | 7.5 | 135 |
| 1 | 1 | 0 | 1 | 0 | 1 | 117 | 7.5 | 135 |
| 1 | 1 | 0 | 1 | 0 | 1 | 118 | 7.5 | 135 |
| 1 | 1 | 0 | 1 | 0 | 1 | 119 | 7.5 | 135 |
| 1 | 1 | 0 | 1 | 0 | 1 | 120 | 7.5 | 135 |
| 1 | 1 | 0 | 1 | 0 | 1 | 121 | 7.5 | 135 |
| 1 | 1 | 0 | 1 | 0 | 1 | 122 | 7.5 | 135 |
| 1 | 1 | 0 | 1 | 0 | 1 | 123 | 7.5 | 135 |
| 1 | 1 | 0 | 1 | 0 | 1 | 124 | 7.5 | 135 |
| 1 | 1 | 0 | 1 | 0 | 1 | 125 | 7.5 | 135 |
| 1 | 1 | 0 | 1 | 0 | 1 | 126 | 7.5 | 135 |
| 1 | 1 | 0 | 1 | 0 | 1 | 127 | 7.5 | 135 |
| 1 | 1 | 0 | 1 | 0 | 1 | 128 | 7.5 | 135 |
| 1 | 1 | 0 | 1 | 0 | 1 | 129 | 7.5 | 135 |
| 1 | 1 | 0 | 1 | 0 | 1 | 130 | 7.5 | 135 |
| 1 | 1 | 0 | 1 | 0 | 1 | 131 | 7.5 | 135 |
| 1 | 1 | 0 | 1 | 0 | 1 | 132 | 7.5 | 135 |
| 1 | 1 | 0 | 1 | 0 | 1 | 133 | 7.5 | 135 |
| 1 | 1 | 0 | 1 | 0 | 1 | 134 | 7.5 | 135 |
| 1 | 1 | 0 | 1 | 0 | 1 | 135 | 7.5 | 135 |
| 1 | 1 | 0 | 1 | 0 | 1 | 136 | 7.5 | 135 |
| 1 | 1 | 0 | 1 | 0 | 1 | 137 | 7.5 | 135 |
| 1 | 1 | 0 | 1 | 0 | 1 | 138 | 7.5 | 135 |
| 1 | 1 | 0 | 1 | 0 | 1 | 139 | 7.5 | 135 |
| 1 | 1 | 0 | 1 | 0 | 1 | 140 | 7.5 | 135 |
| 1 | 1 | 0 | 1 | 0 | 1 | 141 | 7.5 | 135 |
| 1 | 1 | 0 | 1 | 0 | 1 | 142 | 7.5 | 135 |
| 1 | 1 | 0 | 1 | 0 | 1 | 143 | 7.5 | 135 |
| 1 | 1 | 0 | 1 | 0 | 1 | 144 | 7.5 | 135 |
| 1 | 1 | 0 | 1 | 0 | 1 | 145 | 7.5 | 135 |
| 1 | 1 | 0 | 1 | 0 | 1 | 146 | 7.5 | 135 |
| 1 | 1 | 0 | 1 | 0 | 1 | 147 | 7.5 | 135 |
| 1 | 1 | 0 | 1 | 0 | 1 | 148 | 7.5 | 135 |
| 1 | 1 | 0 | 1 | 0 | 1 | 149 | 7.5 | 135 |
| 1 | 1 | 0 | 1 | 0 | 1 | 150 | 7.5 | 135 |
| 1 | 1 | 0 | 1 | 0 | 1 | 151 | 7.5 | 135 |
| 1 | 1 | 0 | 1 | 0 | 1 | 152 | 7.5 | 135 |
| 1 | 1 | 0 | 1 | 0 | 1 | 153 | 7.5 | 135 |
| 1 | 1 | 0 | 1 | 0 | 1 | 154 | 7.5 | 135 |
| 1 | 1 | 0 | 1 | 0 | 1 | 155 | 7.5 | 135 |
| 1 | 1 | 0 | 1 | 0 | 1 | 156 | 7.5 | 135 |
| 1 | 1 | 0 | 1 | 0 | 1 | 157 | 7.5 | 135 |
| 1 | 1 | 0 | 1 | 0 | 1 | 158 | 7.5 | 135 |
| 1 | 1 | 0 | 1 | 0 | 1 | 159 | 7.5 | 135 |
| 1 | 1 | 0 | 1 | 0 | 1 | 160 | 7.5 | 135 |

|   |   |   |   |   |   |     |     |     |
|---|---|---|---|---|---|-----|-----|-----|
| 1 | 1 | 0 | 1 | 0 | 1 | 161 | 7.5 | 135 |
| 1 | 1 | 0 | 1 | 0 | 1 | 162 | 7.5 | 135 |
| 1 | 1 | 0 | 1 | 0 | 1 | 163 | 7.5 | 135 |
| 1 | 1 | 0 | 1 | 0 | 1 | 164 | 7.5 | 135 |
| 1 | 1 | 0 | 1 | 0 | 1 | 165 | 7.5 | 135 |
| 1 | 1 | 0 | 1 | 0 | 1 | 166 | 7.5 | 135 |
| 1 | 1 | 0 | 1 | 0 | 1 | 167 | 7.5 | 135 |
| 1 | 1 | 0 | 1 | 0 | 1 | 168 | 7.5 | 135 |
| 1 | 1 | 0 | 1 | 0 | 1 | 169 | 7.5 | 135 |
| 1 | 1 | 0 | 1 | 0 | 1 | 170 | 7.5 | 135 |
| 1 | 1 | 0 | 1 | 0 | 1 | 171 | 7.5 | 135 |
| 1 | 1 | 0 | 1 | 0 | 1 | 172 | 7.5 | 135 |
| 1 | 1 | 0 | 1 | 0 | 1 | 173 | 7.5 | 135 |
| 1 | 1 | 0 | 1 | 0 | 1 | 174 | 7.5 | 135 |
| 1 | 1 | 0 | 1 | 0 | 1 | 175 | 7.5 | 135 |
| 1 | 1 | 0 | 1 | 0 | 1 | 176 | 7.5 | 135 |
| 1 | 1 | 0 | 1 | 0 | 1 | 177 | 7.5 | 135 |
| 1 | 1 | 0 | 1 | 0 | 1 | 178 | 7.5 | 135 |
| 1 | 1 | 0 | 1 | 0 | 1 | 179 | 7.5 | 135 |
| 1 | 1 | 0 | 1 | 0 | 1 | 180 | 7.5 | 135 |
| 1 | 1 | 0 | 0 | 1 | 1 | 0   | 7.5 | 75  |
| 1 | 1 | 0 | 0 | 1 | 1 | 1   | 7.5 | 75  |
| 1 | 1 | 0 | 0 | 1 | 1 | 2   | 7.5 | 75  |
| 1 | 1 | 0 | 0 | 1 | 1 | 3   | 7.5 | 75  |
| 1 | 1 | 0 | 0 | 1 | 1 | 4   | 7.5 | 75  |
| 1 | 1 | 0 | 0 | 1 | 1 | 5   | 7.5 | 75  |
| 1 | 1 | 0 | 0 | 1 | 1 | 6   | 7.5 | 75  |
| 1 | 1 | 0 | 0 | 1 | 1 | 7   | 7.5 | 75  |
| 1 | 1 | 0 | 0 | 1 | 1 | 8   | 7.5 | 75  |
| 1 | 1 | 0 | 0 | 1 | 1 | 9   | 7.5 | 75  |
| 1 | 1 | 0 | 0 | 1 | 1 | 10  | 7.5 | 75  |
| 1 | 1 | 0 | 0 | 1 | 1 | 11  | 7.5 | 75  |
| 1 | 1 | 0 | 0 | 1 | 1 | 12  | 7.5 | 75  |
| 1 | 1 | 0 | 0 | 1 | 1 | 13  | 7.5 | 75  |
| 1 | 1 | 0 | 0 | 1 | 1 | 14  | 7.5 | 75  |
| 1 | 1 | 0 | 0 | 1 | 1 | 15  | 7.5 | 75  |
| 1 | 1 | 0 | 0 | 1 | 1 | 16  | 7.5 | 75  |
| 1 | 1 | 0 | 0 | 1 | 1 | 17  | 7.5 | 75  |
| 1 | 1 | 0 | 0 | 1 | 1 | 18  | 7.5 | 75  |
| 1 | 1 | 0 | 0 | 1 | 1 | 19  | 7.5 | 75  |
| 1 | 1 | 0 | 0 | 1 | 1 | 20  | 7.5 | 75  |
| 1 | 1 | 0 | 0 | 1 | 1 | 21  | 7.5 | 75  |
| 1 | 1 | 0 | 0 | 1 | 1 | 22  | 7.5 | 75  |
| 1 | 1 | 0 | 0 | 1 | 1 | 23  | 7.5 | 75  |
| 1 | 1 | 0 | 0 | 1 | 1 | 24  | 7.5 | 75  |
| 1 | 1 | 0 | 0 | 1 | 1 | 25  | 7.5 | 75  |

|   |   |   |   |   |   |    |     |    |
|---|---|---|---|---|---|----|-----|----|
| 1 | 1 | 0 | 0 | 1 | 1 | 26 | 7.5 | 75 |
| 1 | 1 | 0 | 0 | 1 | 1 | 27 | 7.5 | 75 |
| 1 | 1 | 0 | 0 | 1 | 1 | 28 | 7.5 | 75 |
| 1 | 1 | 0 | 0 | 1 | 1 | 29 | 7.5 | 75 |
| 1 | 1 | 0 | 0 | 1 | 1 | 30 | 7.5 | 75 |
| 1 | 1 | 0 | 0 | 1 | 1 | 31 | 7.5 | 75 |
| 1 | 1 | 0 | 0 | 1 | 1 | 32 | 7.5 | 75 |
| 1 | 1 | 0 | 0 | 1 | 1 | 33 | 7.5 | 75 |
| 1 | 1 | 0 | 0 | 1 | 1 | 34 | 7.5 | 75 |
| 1 | 1 | 0 | 0 | 1 | 1 | 35 | 7.5 | 75 |
| 1 | 1 | 0 | 0 | 1 | 1 | 36 | 7.5 | 75 |
| 1 | 1 | 0 | 0 | 1 | 1 | 37 | 7.5 | 75 |
| 1 | 1 | 0 | 0 | 1 | 1 | 38 | 7.5 | 75 |
| 1 | 1 | 0 | 0 | 1 | 1 | 39 | 7.5 | 75 |
| 1 | 1 | 0 | 0 | 1 | 1 | 40 | 7.5 | 75 |
| 1 | 1 | 0 | 0 | 1 | 1 | 41 | 7.5 | 75 |
| 1 | 1 | 0 | 0 | 1 | 1 | 42 | 7.5 | 75 |
| 1 | 1 | 0 | 0 | 1 | 1 | 43 | 7.5 | 75 |
| 1 | 1 | 0 | 0 | 1 | 1 | 44 | 7.5 | 75 |
| 1 | 1 | 0 | 0 | 1 | 1 | 45 | 7.5 | 75 |
| 1 | 1 | 0 | 0 | 1 | 1 | 46 | 7.5 | 75 |
| 1 | 1 | 0 | 0 | 1 | 1 | 47 | 7.5 | 75 |
| 1 | 1 | 0 | 0 | 1 | 1 | 48 | 7.5 | 75 |
| 1 | 1 | 0 | 0 | 1 | 1 | 49 | 7.5 | 75 |
| 1 | 1 | 0 | 0 | 1 | 1 | 50 | 7.5 | 75 |
| 1 | 1 | 0 | 0 | 1 | 1 | 51 | 7.5 | 75 |
| 1 | 1 | 0 | 0 | 1 | 1 | 52 | 7.5 | 75 |
| 1 | 1 | 0 | 0 | 1 | 1 | 53 | 7.5 | 75 |
| 1 | 1 | 0 | 0 | 1 | 1 | 54 | 7.5 | 75 |
| 1 | 1 | 0 | 0 | 1 | 1 | 55 | 7.5 | 75 |
| 1 | 1 | 0 | 0 | 1 | 1 | 56 | 7.5 | 75 |
| 1 | 1 | 0 | 0 | 1 | 1 | 57 | 7.5 | 75 |
| 1 | 1 | 0 | 0 | 1 | 1 | 58 | 7.5 | 75 |
| 1 | 1 | 0 | 0 | 1 | 1 | 59 | 7.5 | 75 |
| 1 | 1 | 0 | 0 | 1 | 1 | 60 | 7.5 | 75 |
| 1 | 1 | 0 | 0 | 1 | 1 | 61 | 7.5 | 75 |
| 1 | 1 | 0 | 0 | 1 | 1 | 62 | 7.5 | 75 |
| 1 | 1 | 0 | 0 | 1 | 1 | 63 | 7.5 | 75 |
| 1 | 1 | 0 | 0 | 1 | 1 | 64 | 7.5 | 75 |
| 1 | 1 | 0 | 0 | 1 | 1 | 65 | 7.5 | 75 |
| 1 | 1 | 0 | 0 | 1 | 1 | 66 | 7.5 | 75 |
| 1 | 1 | 0 | 0 | 1 | 1 | 67 | 7.5 | 75 |
| 1 | 1 | 0 | 0 | 1 | 1 | 68 | 7.5 | 75 |
| 1 | 1 | 0 | 0 | 1 | 1 | 69 | 7.5 | 75 |
| 1 | 1 | 0 | 0 | 1 | 1 | 70 | 7.5 | 75 |
| 1 | 1 | 0 | 0 | 1 | 1 | 71 | 7.5 | 75 |

|   |   |   |   |   |   |     |     |     |
|---|---|---|---|---|---|-----|-----|-----|
| 1 | 1 | 0 | 0 | 1 | 1 | 72  | 7.5 | 75  |
| 1 | 1 | 0 | 0 | 1 | 1 | 73  | 7.5 | 75  |
| 1 | 1 | 0 | 0 | 1 | 1 | 74  | 7.5 | 75  |
| 1 | 1 | 0 | 0 | 1 | 1 | 75  | 7.5 | 75  |
| 1 | 1 | 0 | 0 | 1 | 1 | 76  | 7.5 | 75  |
| 1 | 1 | 0 | 0 | 1 | 1 | 77  | 7.5 | 75  |
| 1 | 1 | 0 | 0 | 1 | 1 | 78  | 7.5 | 75  |
| 1 | 1 | 0 | 0 | 1 | 1 | 79  | 7.5 | 75  |
| 1 | 1 | 0 | 0 | 1 | 1 | 80  | 7.5 | 75  |
| 1 | 1 | 0 | 0 | 1 | 1 | 81  | 7.5 | 75  |
| 1 | 1 | 0 | 0 | 1 | 1 | 82  | 7.5 | 75  |
| 1 | 1 | 0 | 0 | 1 | 1 | 83  | 7.5 | 75  |
| 1 | 1 | 0 | 0 | 1 | 1 | 84  | 7.5 | 75  |
| 1 | 1 | 0 | 0 | 1 | 1 | 85  | 7.5 | 75  |
| 1 | 1 | 0 | 0 | 1 | 1 | 86  | 7.5 | 75  |
| 1 | 1 | 0 | 0 | 1 | 1 | 87  | 7.5 | 75  |
| 1 | 1 | 0 | 0 | 1 | 1 | 88  | 7.5 | 75  |
| 1 | 1 | 0 | 0 | 1 | 1 | 89  | 7.5 | 75  |
| 1 | 1 | 0 | 0 | 1 | 1 | 90  | 7.5 | 90  |
| 1 | 1 | 0 | 0 | 1 | 1 | 91  | 7.5 | 105 |
| 1 | 1 | 0 | 0 | 1 | 1 | 92  | 7.5 | 105 |
| 1 | 1 | 0 | 0 | 1 | 1 | 93  | 7.5 | 105 |
| 1 | 1 | 0 | 0 | 1 | 1 | 94  | 7.5 | 105 |
| 1 | 1 | 0 | 0 | 1 | 1 | 95  | 7.5 | 105 |
| 1 | 1 | 0 | 0 | 1 | 1 | 96  | 7.5 | 105 |
| 1 | 1 | 0 | 0 | 1 | 1 | 97  | 7.5 | 105 |
| 1 | 1 | 0 | 0 | 1 | 1 | 98  | 7.5 | 105 |
| 1 | 1 | 0 | 0 | 1 | 1 | 99  | 7.5 | 105 |
| 1 | 1 | 0 | 0 | 1 | 1 | 100 | 7.5 | 105 |
| 1 | 1 | 0 | 0 | 1 | 1 | 101 | 7.5 | 105 |
| 1 | 1 | 0 | 0 | 1 | 1 | 102 | 7.5 | 105 |
| 1 | 1 | 0 | 0 | 1 | 1 | 103 | 7.5 | 105 |
| 1 | 1 | 0 | 0 | 1 | 1 | 104 | 7.5 | 105 |
| 1 | 1 | 0 | 0 | 1 | 1 | 105 | 7.5 | 105 |
| 1 | 1 | 0 | 0 | 1 | 1 | 106 | 7.5 | 105 |
| 1 | 1 | 0 | 0 | 1 | 1 | 107 | 7.5 | 105 |
| 1 | 1 | 0 | 0 | 1 | 1 | 108 | 7.5 | 105 |
| 1 | 1 | 0 | 0 | 1 | 1 | 109 | 7.5 | 105 |
| 1 | 1 | 0 | 0 | 1 | 1 | 110 | 7.5 | 105 |
| 1 | 1 | 0 | 0 | 1 | 1 | 111 | 7.5 | 105 |
| 1 | 1 | 0 | 0 | 1 | 1 | 112 | 7.5 | 105 |
| 1 | 1 | 0 | 0 | 1 | 1 | 113 | 7.5 | 105 |
| 1 | 1 | 0 | 0 | 1 | 1 | 114 | 7.5 | 105 |
| 1 | 1 | 0 | 0 | 1 | 1 | 115 | 7.5 | 105 |
| 1 | 1 | 0 | 0 | 1 | 1 | 116 | 7.5 | 105 |
| 1 | 1 | 0 | 0 | 1 | 1 | 117 | 7.5 | 105 |

|   |   |   |   |   |   |     |     |     |
|---|---|---|---|---|---|-----|-----|-----|
| 1 | 1 | 0 | 0 | 1 | 1 | 118 | 7.5 | 105 |
| 1 | 1 | 0 | 0 | 1 | 1 | 119 | 7.5 | 105 |
| 1 | 1 | 0 | 0 | 1 | 1 | 120 | 7.5 | 105 |
| 1 | 1 | 0 | 0 | 1 | 1 | 121 | 7.5 | 105 |
| 1 | 1 | 0 | 0 | 1 | 1 | 122 | 7.5 | 105 |
| 1 | 1 | 0 | 0 | 1 | 1 | 123 | 7.5 | 105 |
| 1 | 1 | 0 | 0 | 1 | 1 | 124 | 7.5 | 105 |
| 1 | 1 | 0 | 0 | 1 | 1 | 125 | 7.5 | 105 |
| 1 | 1 | 0 | 0 | 1 | 1 | 126 | 7.5 | 105 |
| 1 | 1 | 0 | 0 | 1 | 1 | 127 | 7.5 | 105 |
| 1 | 1 | 0 | 0 | 1 | 1 | 128 | 7.5 | 105 |
| 1 | 1 | 0 | 0 | 1 | 1 | 129 | 7.5 | 105 |
| 1 | 1 | 0 | 0 | 1 | 1 | 130 | 7.5 | 105 |
| 1 | 1 | 0 | 0 | 1 | 1 | 131 | 7.5 | 105 |
| 1 | 1 | 0 | 0 | 1 | 1 | 132 | 7.5 | 105 |
| 1 | 1 | 0 | 0 | 1 | 1 | 133 | 7.5 | 105 |
| 1 | 1 | 0 | 0 | 1 | 1 | 134 | 7.5 | 105 |
| 1 | 1 | 0 | 0 | 1 | 1 | 135 | 7.5 | 105 |
| 1 | 1 | 0 | 0 | 1 | 1 | 136 | 7.5 | 105 |
| 1 | 1 | 0 | 0 | 1 | 1 | 137 | 7.5 | 105 |
| 1 | 1 | 0 | 0 | 1 | 1 | 138 | 7.5 | 105 |
| 1 | 1 | 0 | 0 | 1 | 1 | 139 | 7.5 | 105 |
| 1 | 1 | 0 | 0 | 1 | 1 | 140 | 7.5 | 105 |
| 1 | 1 | 0 | 0 | 1 | 1 | 141 | 7.5 | 105 |
| 1 | 1 | 0 | 0 | 1 | 1 | 142 | 7.5 | 105 |
| 1 | 1 | 0 | 0 | 1 | 1 | 143 | 7.5 | 105 |
| 1 | 1 | 0 | 0 | 1 | 1 | 144 | 7.5 | 105 |
| 1 | 1 | 0 | 0 | 1 | 1 | 145 | 7.5 | 105 |
| 1 | 1 | 0 | 0 | 1 | 1 | 146 | 7.5 | 105 |
| 1 | 1 | 0 | 0 | 1 | 1 | 147 | 7.5 | 105 |
| 1 | 1 | 0 | 0 | 1 | 1 | 148 | 7.5 | 105 |
| 1 | 1 | 0 | 0 | 1 | 1 | 149 | 7.5 | 105 |
| 1 | 1 | 0 | 0 | 1 | 1 | 150 | 7.5 | 105 |
| 1 | 1 | 0 | 0 | 1 | 1 | 151 | 7.5 | 105 |
| 1 | 1 | 0 | 0 | 1 | 1 | 152 | 7.5 | 105 |
| 1 | 1 | 0 | 0 | 1 | 1 | 153 | 7.5 | 105 |
| 1 | 1 | 0 | 0 | 1 | 1 | 154 | 7.5 | 105 |
| 1 | 1 | 0 | 0 | 1 | 1 | 155 | 7.5 | 105 |
| 1 | 1 | 0 | 0 | 1 | 1 | 156 | 7.5 | 105 |
| 1 | 1 | 0 | 0 | 1 | 1 | 157 | 7.5 | 105 |
| 1 | 1 | 0 | 0 | 1 | 1 | 158 | 7.5 | 105 |
| 1 | 1 | 0 | 0 | 1 | 1 | 159 | 7.5 | 105 |
| 1 | 1 | 0 | 0 | 1 | 1 | 160 | 7.5 | 105 |
| 1 | 1 | 0 | 0 | 1 | 1 | 161 | 7.5 | 105 |
| 1 | 1 | 0 | 0 | 1 | 1 | 162 | 7.5 | 105 |
| 1 | 1 | 0 | 0 | 1 | 1 | 163 | 7.5 | 105 |

|   |   |   |   |   |   |     |     |     |
|---|---|---|---|---|---|-----|-----|-----|
| 1 | 1 | 0 | 0 | 1 | 1 | 164 | 7.5 | 105 |
| 1 | 1 | 0 | 0 | 1 | 1 | 165 | 7.5 | 105 |
| 1 | 1 | 0 | 0 | 1 | 1 | 166 | 7.5 | 105 |
| 1 | 1 | 0 | 0 | 1 | 1 | 167 | 7.5 | 105 |
| 1 | 1 | 0 | 0 | 1 | 1 | 168 | 7.5 | 105 |
| 1 | 1 | 0 | 0 | 1 | 1 | 169 | 7.5 | 105 |
| 1 | 1 | 0 | 0 | 1 | 1 | 170 | 7.5 | 105 |
| 1 | 1 | 0 | 0 | 1 | 1 | 171 | 7.5 | 105 |
| 1 | 1 | 0 | 0 | 1 | 1 | 172 | 7.5 | 105 |
| 1 | 1 | 0 | 0 | 1 | 1 | 173 | 7.5 | 105 |
| 1 | 1 | 0 | 0 | 1 | 1 | 174 | 7.5 | 105 |
| 1 | 1 | 0 | 0 | 1 | 1 | 175 | 7.5 | 105 |
| 1 | 1 | 0 | 0 | 1 | 1 | 176 | 7.5 | 105 |
| 1 | 1 | 0 | 0 | 1 | 1 | 177 | 7.5 | 105 |
| 1 | 1 | 0 | 0 | 1 | 1 | 178 | 7.5 | 105 |
| 1 | 1 | 0 | 0 | 1 | 1 | 179 | 7.5 | 105 |
| 1 | 1 | 0 | 0 | 1 | 1 | 180 | 7.5 | 105 |
| 1 | 0 | 1 | 1 | 1 | 0 | 0   | 7.5 | 45  |
| 1 | 0 | 1 | 1 | 1 | 0 | 1   | 7.5 | 45  |
| 1 | 0 | 1 | 1 | 1 | 0 | 2   | 7.5 | 45  |
| 1 | 0 | 1 | 1 | 1 | 0 | 3   | 7.5 | 45  |
| 1 | 0 | 1 | 1 | 1 | 0 | 4   | 7.5 | 45  |
| 1 | 0 | 1 | 1 | 1 | 0 | 5   | 7.5 | 45  |
| 1 | 0 | 1 | 1 | 1 | 0 | 6   | 7.5 | 45  |
| 1 | 0 | 1 | 1 | 1 | 0 | 7   | 7.5 | 45  |
| 1 | 0 | 1 | 1 | 1 | 0 | 8   | 7.5 | 45  |
| 1 | 0 | 1 | 1 | 1 | 0 | 9   | 7.5 | 45  |
| 1 | 0 | 1 | 1 | 1 | 0 | 10  | 7.5 | 45  |
| 1 | 0 | 1 | 1 | 1 | 0 | 11  | 7.5 | 45  |
| 1 | 0 | 1 | 1 | 1 | 0 | 12  | 7.5 | 45  |
| 1 | 0 | 1 | 1 | 1 | 0 | 13  | 7.5 | 45  |
| 1 | 0 | 1 | 1 | 1 | 0 | 14  | 7.5 | 45  |
| 1 | 0 | 1 | 1 | 1 | 0 | 15  | 7.5 | 45  |
| 1 | 0 | 1 | 1 | 1 | 0 | 16  | 7.5 | 45  |
| 1 | 0 | 1 | 1 | 1 | 0 | 17  | 7.5 | 45  |
| 1 | 0 | 1 | 1 | 1 | 0 | 18  | 7.5 | 45  |
| 1 | 0 | 1 | 1 | 1 | 0 | 19  | 7.5 | 45  |
| 1 | 0 | 1 | 1 | 1 | 0 | 20  | 7.5 | 45  |
| 1 | 0 | 1 | 1 | 1 | 0 | 21  | 7.5 | 45  |
| 1 | 0 | 1 | 1 | 1 | 0 | 22  | 7.5 | 45  |
| 1 | 0 | 1 | 1 | 1 | 0 | 23  | 7.5 | 45  |
| 1 | 0 | 1 | 1 | 1 | 0 | 24  | 7.5 | 45  |
| 1 | 0 | 1 | 1 | 1 | 0 | 25  | 7.5 | 45  |
| 1 | 0 | 1 | 1 | 1 | 0 | 26  | 7.5 | 45  |
| 1 | 0 | 1 | 1 | 1 | 0 | 27  | 7.5 | 45  |
| 1 | 0 | 1 | 1 | 1 | 0 | 28  | 7.5 | 45  |

|   |   |   |   |   |   |    |     |    |
|---|---|---|---|---|---|----|-----|----|
| 1 | 0 | 1 | 1 | 1 | 0 | 29 | 7.5 | 45 |
| 1 | 0 | 1 | 1 | 1 | 0 | 30 | 7.5 | 45 |
| 1 | 0 | 1 | 1 | 1 | 0 | 31 | 7.5 | 45 |
| 1 | 0 | 1 | 1 | 1 | 0 | 32 | 7.5 | 45 |
| 1 | 0 | 1 | 1 | 1 | 0 | 33 | 7.5 | 45 |
| 1 | 0 | 1 | 1 | 1 | 0 | 34 | 7.5 | 45 |
| 1 | 0 | 1 | 1 | 1 | 0 | 35 | 7.5 | 45 |
| 1 | 0 | 1 | 1 | 1 | 0 | 36 | 7.5 | 45 |
| 1 | 0 | 1 | 1 | 1 | 0 | 37 | 7.5 | 45 |
| 1 | 0 | 1 | 1 | 1 | 0 | 38 | 7.5 | 45 |
| 1 | 0 | 1 | 1 | 1 | 0 | 39 | 7.5 | 45 |
| 1 | 0 | 1 | 1 | 1 | 0 | 40 | 7.5 | 45 |
| 1 | 0 | 1 | 1 | 1 | 0 | 41 | 7.5 | 45 |
| 1 | 0 | 1 | 1 | 1 | 0 | 42 | 7.5 | 45 |
| 1 | 0 | 1 | 1 | 1 | 0 | 43 | 7.5 | 45 |
| 1 | 0 | 1 | 1 | 1 | 0 | 44 | 7.5 | 45 |
| 1 | 0 | 1 | 1 | 1 | 0 | 45 | 7.5 | 45 |
| 1 | 0 | 1 | 1 | 1 | 0 | 46 | 7.5 | 45 |
| 1 | 0 | 1 | 1 | 1 | 0 | 47 | 7.5 | 45 |
| 1 | 0 | 1 | 1 | 1 | 0 | 48 | 7.5 | 45 |
| 1 | 0 | 1 | 1 | 1 | 0 | 49 | 7.5 | 45 |
| 1 | 0 | 1 | 1 | 1 | 0 | 50 | 7.5 | 45 |
| 1 | 0 | 1 | 1 | 1 | 0 | 51 | 7.5 | 45 |
| 1 | 0 | 1 | 1 | 1 | 0 | 52 | 7.5 | 45 |
| 1 | 0 | 1 | 1 | 1 | 0 | 53 | 7.5 | 45 |
| 1 | 0 | 1 | 1 | 1 | 0 | 54 | 7.5 | 45 |
| 1 | 0 | 1 | 1 | 1 | 0 | 55 | 7.5 | 45 |
| 1 | 0 | 1 | 1 | 1 | 0 | 56 | 7.5 | 45 |
| 1 | 0 | 1 | 1 | 1 | 0 | 57 | 7.5 | 45 |
| 1 | 0 | 1 | 1 | 1 | 0 | 58 | 7.5 | 45 |
| 1 | 0 | 1 | 1 | 1 | 0 | 59 | 7.5 | 45 |
| 1 | 0 | 1 | 1 | 1 | 0 | 60 | 7.5 | 45 |
| 1 | 0 | 1 | 1 | 1 | 0 | 61 | 7.5 | 45 |
| 1 | 0 | 1 | 1 | 1 | 0 | 62 | 7.5 | 45 |
| 1 | 0 | 1 | 1 | 1 | 0 | 63 | 7.5 | 45 |
| 1 | 0 | 1 | 1 | 1 | 0 | 64 | 7.5 | 45 |
| 1 | 0 | 1 | 1 | 1 | 0 | 65 | 7.5 | 45 |
| 1 | 0 | 1 | 1 | 1 | 0 | 66 | 7.5 | 45 |
| 1 | 0 | 1 | 1 | 1 | 0 | 67 | 7.5 | 45 |
| 1 | 0 | 1 | 1 | 1 | 0 | 68 | 7.5 | 45 |
| 1 | 0 | 1 | 1 | 1 | 0 | 69 | 7.5 | 45 |
| 1 | 0 | 1 | 1 | 1 | 0 | 70 | 7.5 | 45 |
| 1 | 0 | 1 | 1 | 1 | 0 | 71 | 7.5 | 45 |
| 1 | 0 | 1 | 1 | 1 | 0 | 72 | 7.5 | 45 |
| 1 | 0 | 1 | 1 | 1 | 0 | 73 | 7.5 | 45 |
| 1 | 0 | 1 | 1 | 1 | 0 | 74 | 7.5 | 45 |

|   |   |   |   |   |   |     |     |     |
|---|---|---|---|---|---|-----|-----|-----|
| 1 | 0 | 1 | 1 | 1 | 0 | 75  | 7.5 | 45  |
| 1 | 0 | 1 | 1 | 1 | 0 | 76  | 7.5 | 45  |
| 1 | 0 | 1 | 1 | 1 | 0 | 77  | 7.5 | 45  |
| 1 | 0 | 1 | 1 | 1 | 0 | 78  | 7.5 | 45  |
| 1 | 0 | 1 | 1 | 1 | 0 | 79  | 7.5 | 45  |
| 1 | 0 | 1 | 1 | 1 | 0 | 80  | 7.5 | 45  |
| 1 | 0 | 1 | 1 | 1 | 0 | 81  | 7.5 | 45  |
| 1 | 0 | 1 | 1 | 1 | 0 | 82  | 7.5 | 45  |
| 1 | 0 | 1 | 1 | 1 | 0 | 83  | 7.5 | 45  |
| 1 | 0 | 1 | 1 | 1 | 0 | 84  | 7.5 | 45  |
| 1 | 0 | 1 | 1 | 1 | 0 | 85  | 7.5 | 45  |
| 1 | 0 | 1 | 1 | 1 | 0 | 86  | 7.5 | 45  |
| 1 | 0 | 1 | 1 | 1 | 0 | 87  | 7.5 | 45  |
| 1 | 0 | 1 | 1 | 1 | 0 | 88  | 7.5 | 45  |
| 1 | 0 | 1 | 1 | 1 | 0 | 89  | 7.5 | 45  |
| 1 | 0 | 1 | 1 | 1 | 0 | 90  | 7.5 | 45  |
| 1 | 0 | 1 | 1 | 1 | 0 | 91  | 7.5 | 45  |
| 1 | 0 | 1 | 1 | 1 | 0 | 92  | 7.5 | 45  |
| 1 | 0 | 1 | 1 | 1 | 0 | 93  | 7.5 | 45  |
| 1 | 0 | 1 | 1 | 1 | 0 | 94  | 7.5 | 45  |
| 1 | 0 | 1 | 1 | 1 | 0 | 95  | 7.5 | 45  |
| 1 | 0 | 1 | 1 | 1 | 0 | 96  | 7.5 | 45  |
| 1 | 0 | 1 | 1 | 1 | 0 | 97  | 7.5 | 45  |
| 1 | 0 | 1 | 1 | 1 | 0 | 98  | 7.5 | 45  |
| 1 | 0 | 1 | 1 | 1 | 0 | 99  | 7.5 | 45  |
| 1 | 0 | 1 | 1 | 1 | 0 | 100 | 7.5 | 45  |
| 1 | 0 | 1 | 1 | 1 | 0 | 101 | 7.5 | 45  |
| 1 | 0 | 1 | 1 | 1 | 0 | 102 | 7.5 | 45  |
| 1 | 0 | 1 | 1 | 1 | 0 | 103 | 7.5 | 45  |
| 1 | 0 | 1 | 1 | 1 | 0 | 104 | 7.5 | 45  |
| 1 | 0 | 1 | 1 | 1 | 0 | 105 | 7.5 | 45  |
| 1 | 0 | 1 | 1 | 1 | 0 | 106 | 7.5 | 165 |
| 1 | 0 | 1 | 1 | 1 | 0 | 107 | 7.5 | 165 |
| 1 | 0 | 1 | 1 | 1 | 0 | 108 | 7.5 | 165 |
| 1 | 0 | 1 | 1 | 1 | 0 | 109 | 7.5 | 165 |
| 1 | 0 | 1 | 1 | 1 | 0 | 110 | 7.5 | 165 |
| 1 | 0 | 1 | 1 | 1 | 0 | 111 | 7.5 | 165 |
| 1 | 0 | 1 | 1 | 1 | 0 | 112 | 7.5 | 165 |
| 1 | 0 | 1 | 1 | 1 | 0 | 113 | 7.5 | 165 |
| 1 | 0 | 1 | 1 | 1 | 0 | 114 | 7.5 | 165 |
| 1 | 0 | 1 | 1 | 1 | 0 | 115 | 7.5 | 165 |
| 1 | 0 | 1 | 1 | 1 | 0 | 116 | 7.5 | 165 |
| 1 | 0 | 1 | 1 | 1 | 0 | 117 | 7.5 | 165 |
| 1 | 0 | 1 | 1 | 1 | 0 | 118 | 7.5 | 165 |
| 1 | 0 | 1 | 1 | 1 | 0 | 119 | 7.5 | 165 |
| 1 | 0 | 1 | 1 | 1 | 0 | 120 | 7.5 | 165 |

|   |   |   |   |   |   |     |     |     |
|---|---|---|---|---|---|-----|-----|-----|
| 1 | 0 | 1 | 1 | 1 | 0 | 121 | 7.5 | 165 |
| 1 | 0 | 1 | 1 | 1 | 0 | 122 | 7.5 | 165 |
| 1 | 0 | 1 | 1 | 1 | 0 | 123 | 7.5 | 165 |
| 1 | 0 | 1 | 1 | 1 | 0 | 124 | 7.5 | 165 |
| 1 | 0 | 1 | 1 | 1 | 0 | 125 | 7.5 | 165 |
| 1 | 0 | 1 | 1 | 1 | 0 | 126 | 7.5 | 165 |
| 1 | 0 | 1 | 1 | 1 | 0 | 127 | 7.5 | 165 |
| 1 | 0 | 1 | 1 | 1 | 0 | 128 | 7.5 | 165 |
| 1 | 0 | 1 | 1 | 1 | 0 | 129 | 7.5 | 165 |
| 1 | 0 | 1 | 1 | 1 | 0 | 130 | 7.5 | 165 |
| 1 | 0 | 1 | 1 | 1 | 0 | 131 | 7.5 | 165 |
| 1 | 0 | 1 | 1 | 1 | 0 | 132 | 7.5 | 165 |
| 1 | 0 | 1 | 1 | 1 | 0 | 133 | 7.5 | 165 |
| 1 | 0 | 1 | 1 | 1 | 0 | 134 | 7.5 | 165 |
| 1 | 0 | 1 | 1 | 1 | 0 | 135 | 7.5 | 165 |
| 1 | 0 | 1 | 1 | 1 | 0 | 136 | 7.5 | 165 |
| 1 | 0 | 1 | 1 | 1 | 0 | 137 | 7.5 | 165 |
| 1 | 0 | 1 | 1 | 1 | 0 | 138 | 7.5 | 165 |
| 1 | 0 | 1 | 1 | 1 | 0 | 139 | 7.5 | 165 |
| 1 | 0 | 1 | 1 | 1 | 0 | 140 | 7.5 | 165 |
| 1 | 0 | 1 | 1 | 1 | 0 | 141 | 7.5 | 165 |
| 1 | 0 | 1 | 1 | 1 | 0 | 142 | 7.5 | 165 |
| 1 | 0 | 1 | 1 | 1 | 0 | 143 | 7.5 | 165 |
| 1 | 0 | 1 | 1 | 1 | 0 | 144 | 7.5 | 165 |
| 1 | 0 | 1 | 1 | 1 | 0 | 145 | 7.5 | 165 |
| 1 | 0 | 1 | 1 | 1 | 0 | 146 | 7.5 | 165 |
| 1 | 0 | 1 | 1 | 1 | 0 | 147 | 7.5 | 165 |
| 1 | 0 | 1 | 1 | 1 | 0 | 148 | 7.5 | 165 |
| 1 | 0 | 1 | 1 | 1 | 0 | 149 | 7.5 | 165 |
| 1 | 0 | 1 | 1 | 1 | 0 | 150 | 7.5 | 165 |
| 1 | 0 | 1 | 1 | 1 | 0 | 151 | 7.5 | 165 |
| 1 | 0 | 1 | 1 | 1 | 0 | 152 | 7.5 | 165 |
| 1 | 0 | 1 | 1 | 1 | 0 | 153 | 7.5 | 165 |
| 1 | 0 | 1 | 1 | 1 | 0 | 154 | 7.5 | 165 |
| 1 | 0 | 1 | 1 | 1 | 0 | 155 | 7.5 | 165 |
| 1 | 0 | 1 | 1 | 1 | 0 | 156 | 7.5 | 165 |
| 1 | 0 | 1 | 1 | 1 | 0 | 157 | 7.5 | 165 |
| 1 | 0 | 1 | 1 | 1 | 0 | 158 | 7.5 | 165 |
| 1 | 0 | 1 | 1 | 1 | 0 | 159 | 7.5 | 165 |
| 1 | 0 | 1 | 1 | 1 | 0 | 160 | 7.5 | 165 |
| 1 | 0 | 1 | 1 | 1 | 0 | 161 | 7.5 | 165 |
| 1 | 0 | 1 | 1 | 1 | 0 | 162 | 7.5 | 165 |
| 1 | 0 | 1 | 1 | 1 | 0 | 163 | 7.5 | 165 |
| 1 | 0 | 1 | 1 | 1 | 0 | 164 | 7.5 | 165 |
| 1 | 0 | 1 | 1 | 1 | 0 | 165 | 7.5 | 165 |
| 1 | 0 | 1 | 1 | 1 | 0 | 166 | 7.5 | 165 |

|   |   |   |   |   |   |     |     |     |
|---|---|---|---|---|---|-----|-----|-----|
| 1 | 0 | 1 | 1 | 1 | 0 | 167 | 7.5 | 165 |
| 1 | 0 | 1 | 1 | 1 | 0 | 168 | 7.5 | 165 |
| 1 | 0 | 1 | 1 | 1 | 0 | 169 | 7.5 | 165 |
| 1 | 0 | 1 | 1 | 1 | 0 | 170 | 7.5 | 165 |
| 1 | 0 | 1 | 1 | 1 | 0 | 171 | 7.5 | 165 |
| 1 | 0 | 1 | 1 | 1 | 0 | 172 | 7.5 | 165 |
| 1 | 0 | 1 | 1 | 1 | 0 | 173 | 7.5 | 165 |
| 1 | 0 | 1 | 1 | 1 | 0 | 174 | 7.5 | 165 |
| 1 | 0 | 1 | 1 | 1 | 0 | 175 | 7.5 | 165 |
| 1 | 0 | 1 | 1 | 1 | 0 | 176 | 7.5 | 165 |
| 1 | 0 | 1 | 1 | 1 | 0 | 177 | 7.5 | 165 |
| 1 | 0 | 1 | 1 | 1 | 0 | 178 | 7.5 | 165 |
| 1 | 0 | 1 | 1 | 1 | 0 | 179 | 7.5 | 165 |
| 1 | 0 | 1 | 1 | 1 | 0 | 180 | 7.5 | 180 |
| 1 | 0 | 1 | 1 | 0 | 1 | 0   | 7.5 | 45  |
| 1 | 0 | 1 | 1 | 0 | 1 | 1   | 7.5 | 45  |
| 1 | 0 | 1 | 1 | 0 | 1 | 2   | 7.5 | 45  |
| 1 | 0 | 1 | 1 | 0 | 1 | 3   | 7.5 | 45  |
| 1 | 0 | 1 | 1 | 0 | 1 | 4   | 7.5 | 45  |
| 1 | 0 | 1 | 1 | 0 | 1 | 5   | 7.5 | 45  |
| 1 | 0 | 1 | 1 | 0 | 1 | 6   | 7.5 | 45  |
| 1 | 0 | 1 | 1 | 0 | 1 | 7   | 7.5 | 45  |
| 1 | 0 | 1 | 1 | 0 | 1 | 8   | 7.5 | 45  |
| 1 | 0 | 1 | 1 | 0 | 1 | 9   | 7.5 | 45  |
| 1 | 0 | 1 | 1 | 0 | 1 | 10  | 7.5 | 45  |
| 1 | 0 | 1 | 1 | 0 | 1 | 11  | 7.5 | 45  |
| 1 | 0 | 1 | 1 | 0 | 1 | 12  | 7.5 | 45  |
| 1 | 0 | 1 | 1 | 0 | 1 | 13  | 7.5 | 45  |
| 1 | 0 | 1 | 1 | 0 | 1 | 14  | 7.5 | 45  |
| 1 | 0 | 1 | 1 | 0 | 1 | 15  | 7.5 | 45  |
| 1 | 0 | 1 | 1 | 0 | 1 | 16  | 7.5 | 45  |
| 1 | 0 | 1 | 1 | 0 | 1 | 17  | 7.5 | 45  |
| 1 | 0 | 1 | 1 | 0 | 1 | 18  | 7.5 | 45  |
| 1 | 0 | 1 | 1 | 0 | 1 | 19  | 7.5 | 45  |
| 1 | 0 | 1 | 1 | 0 | 1 | 20  | 7.5 | 45  |
| 1 | 0 | 1 | 1 | 0 | 1 | 21  | 7.5 | 45  |
| 1 | 0 | 1 | 1 | 0 | 1 | 22  | 7.5 | 45  |
| 1 | 0 | 1 | 1 | 0 | 1 | 23  | 7.5 | 45  |
| 1 | 0 | 1 | 1 | 0 | 1 | 24  | 7.5 | 45  |
| 1 | 0 | 1 | 1 | 0 | 1 | 25  | 7.5 | 45  |
| 1 | 0 | 1 | 1 | 0 | 1 | 26  | 7.5 | 45  |
| 1 | 0 | 1 | 1 | 0 | 1 | 27  | 7.5 | 45  |
| 1 | 0 | 1 | 1 | 0 | 1 | 28  | 7.5 | 45  |
| 1 | 0 | 1 | 1 | 0 | 1 | 29  | 7.5 | 45  |
| 1 | 0 | 1 | 1 | 0 | 1 | 30  | 7.5 | 45  |
| 1 | 0 | 1 | 1 | 0 | 1 | 31  | 7.5 | 45  |

|   |   |   |   |   |   |    |     |    |
|---|---|---|---|---|---|----|-----|----|
| 1 | 0 | 1 | 1 | 0 | 1 | 32 | 7.5 | 45 |
| 1 | 0 | 1 | 1 | 0 | 1 | 33 | 7.5 | 45 |
| 1 | 0 | 1 | 1 | 0 | 1 | 34 | 7.5 | 45 |
| 1 | 0 | 1 | 1 | 0 | 1 | 35 | 7.5 | 45 |
| 1 | 0 | 1 | 1 | 0 | 1 | 36 | 7.5 | 45 |
| 1 | 0 | 1 | 1 | 0 | 1 | 37 | 7.5 | 45 |
| 1 | 0 | 1 | 1 | 0 | 1 | 38 | 7.5 | 45 |
| 1 | 0 | 1 | 1 | 0 | 1 | 39 | 7.5 | 45 |
| 1 | 0 | 1 | 1 | 0 | 1 | 40 | 7.5 | 45 |
| 1 | 0 | 1 | 1 | 0 | 1 | 41 | 7.5 | 45 |
| 1 | 0 | 1 | 1 | 0 | 1 | 42 | 7.5 | 45 |
| 1 | 0 | 1 | 1 | 0 | 1 | 43 | 7.5 | 45 |
| 1 | 0 | 1 | 1 | 0 | 1 | 44 | 7.5 | 45 |
| 1 | 0 | 1 | 1 | 0 | 1 | 45 | 7.5 | 45 |
| 1 | 0 | 1 | 1 | 0 | 1 | 46 | 7.5 | 45 |
| 1 | 0 | 1 | 1 | 0 | 1 | 47 | 7.5 | 45 |
| 1 | 0 | 1 | 1 | 0 | 1 | 48 | 7.5 | 45 |
| 1 | 0 | 1 | 1 | 0 | 1 | 49 | 7.5 | 45 |
| 1 | 0 | 1 | 1 | 0 | 1 | 50 | 7.5 | 45 |
| 1 | 0 | 1 | 1 | 0 | 1 | 51 | 7.5 | 45 |
| 1 | 0 | 1 | 1 | 0 | 1 | 52 | 7.5 | 45 |
| 1 | 0 | 1 | 1 | 0 | 1 | 53 | 7.5 | 45 |
| 1 | 0 | 1 | 1 | 0 | 1 | 54 | 7.5 | 45 |
| 1 | 0 | 1 | 1 | 0 | 1 | 55 | 7.5 | 45 |
| 1 | 0 | 1 | 1 | 0 | 1 | 56 | 7.5 | 45 |
| 1 | 0 | 1 | 1 | 0 | 1 | 57 | 7.5 | 45 |
| 1 | 0 | 1 | 1 | 0 | 1 | 58 | 7.5 | 45 |
| 1 | 0 | 1 | 1 | 0 | 1 | 59 | 7.5 | 45 |
| 1 | 0 | 1 | 1 | 0 | 1 | 60 | 7.5 | 45 |
| 1 | 0 | 1 | 1 | 0 | 1 | 61 | 7.5 | 45 |
| 1 | 0 | 1 | 1 | 0 | 1 | 62 | 7.5 | 45 |
| 1 | 0 | 1 | 1 | 0 | 1 | 63 | 7.5 | 45 |
| 1 | 0 | 1 | 1 | 0 | 1 | 64 | 7.5 | 45 |
| 1 | 0 | 1 | 1 | 0 | 1 | 65 | 7.5 | 45 |
| 1 | 0 | 1 | 1 | 0 | 1 | 66 | 7.5 | 45 |
| 1 | 0 | 1 | 1 | 0 | 1 | 67 | 7.5 | 45 |
| 1 | 0 | 1 | 1 | 0 | 1 | 68 | 7.5 | 45 |
| 1 | 0 | 1 | 1 | 0 | 1 | 69 | 7.5 | 45 |
| 1 | 0 | 1 | 1 | 0 | 1 | 70 | 7.5 | 45 |
| 1 | 0 | 1 | 1 | 0 | 1 | 71 | 7.5 | 45 |
| 1 | 0 | 1 | 1 | 0 | 1 | 72 | 7.5 | 45 |
| 1 | 0 | 1 | 1 | 0 | 1 | 73 | 7.5 | 45 |
| 1 | 0 | 1 | 1 | 0 | 1 | 74 | 7.5 | 45 |
| 1 | 0 | 1 | 1 | 0 | 1 | 75 | 7.5 | 45 |
| 1 | 0 | 1 | 1 | 0 | 1 | 76 | 7.5 | 45 |
| 1 | 0 | 1 | 1 | 0 | 1 | 77 | 7.5 | 45 |

|   |   |   |   |   |   |     |     |     |
|---|---|---|---|---|---|-----|-----|-----|
| 1 | 0 | 1 | 1 | 0 | 1 | 78  | 7.5 | 45  |
| 1 | 0 | 1 | 1 | 0 | 1 | 79  | 7.5 | 45  |
| 1 | 0 | 1 | 1 | 0 | 1 | 80  | 7.5 | 45  |
| 1 | 0 | 1 | 1 | 0 | 1 | 81  | 7.5 | 45  |
| 1 | 0 | 1 | 1 | 0 | 1 | 82  | 7.5 | 45  |
| 1 | 0 | 1 | 1 | 0 | 1 | 83  | 7.5 | 45  |
| 1 | 0 | 1 | 1 | 0 | 1 | 84  | 7.5 | 45  |
| 1 | 0 | 1 | 1 | 0 | 1 | 85  | 7.5 | 45  |
| 1 | 0 | 1 | 1 | 0 | 1 | 86  | 7.5 | 45  |
| 1 | 0 | 1 | 1 | 0 | 1 | 87  | 7.5 | 45  |
| 1 | 0 | 1 | 1 | 0 | 1 | 88  | 7.5 | 45  |
| 1 | 0 | 1 | 1 | 0 | 1 | 89  | 7.5 | 45  |
| 1 | 0 | 1 | 1 | 0 | 1 | 90  | 7.5 | 135 |
| 1 | 0 | 1 | 1 | 0 | 1 | 91  | 7.5 | 135 |
| 1 | 0 | 1 | 1 | 0 | 1 | 92  | 7.5 | 135 |
| 1 | 0 | 1 | 1 | 0 | 1 | 93  | 7.5 | 135 |
| 1 | 0 | 1 | 1 | 0 | 1 | 94  | 7.5 | 135 |
| 1 | 0 | 1 | 1 | 0 | 1 | 95  | 7.5 | 135 |
| 1 | 0 | 1 | 1 | 0 | 1 | 96  | 7.5 | 135 |
| 1 | 0 | 1 | 1 | 0 | 1 | 97  | 7.5 | 135 |
| 1 | 0 | 1 | 1 | 0 | 1 | 98  | 7.5 | 135 |
| 1 | 0 | 1 | 1 | 0 | 1 | 99  | 7.5 | 135 |
| 1 | 0 | 1 | 1 | 0 | 1 | 100 | 7.5 | 135 |
| 1 | 0 | 1 | 1 | 0 | 1 | 101 | 7.5 | 135 |
| 1 | 0 | 1 | 1 | 0 | 1 | 102 | 7.5 | 135 |
| 1 | 0 | 1 | 1 | 0 | 1 | 103 | 7.5 | 135 |
| 1 | 0 | 1 | 1 | 0 | 1 | 104 | 7.5 | 135 |
| 1 | 0 | 1 | 1 | 0 | 1 | 105 | 7.5 | 135 |
| 1 | 0 | 1 | 1 | 0 | 1 | 106 | 7.5 | 135 |
| 1 | 0 | 1 | 1 | 0 | 1 | 107 | 7.5 | 135 |
| 1 | 0 | 1 | 1 | 0 | 1 | 108 | 7.5 | 135 |
| 1 | 0 | 1 | 1 | 0 | 1 | 109 | 7.5 | 135 |
| 1 | 0 | 1 | 1 | 0 | 1 | 110 | 7.5 | 135 |
| 1 | 0 | 1 | 1 | 0 | 1 | 111 | 7.5 | 135 |
| 1 | 0 | 1 | 1 | 0 | 1 | 112 | 7.5 | 135 |
| 1 | 0 | 1 | 1 | 0 | 1 | 113 | 7.5 | 135 |
| 1 | 0 | 1 | 1 | 0 | 1 | 114 | 7.5 | 135 |
| 1 | 0 | 1 | 1 | 0 | 1 | 115 | 7.5 | 135 |
| 1 | 0 | 1 | 1 | 0 | 1 | 116 | 7.5 | 135 |
| 1 | 0 | 1 | 1 | 0 | 1 | 117 | 7.5 | 135 |
| 1 | 0 | 1 | 1 | 0 | 1 | 118 | 7.5 | 135 |
| 1 | 0 | 1 | 1 | 0 | 1 | 119 | 7.5 | 135 |
| 1 | 0 | 1 | 1 | 0 | 1 | 120 | 7.5 | 135 |
| 1 | 0 | 1 | 1 | 0 | 1 | 121 | 7.5 | 135 |
| 1 | 0 | 1 | 1 | 0 | 1 | 122 | 7.5 | 135 |
| 1 | 0 | 1 | 1 | 0 | 1 | 123 | 7.5 | 135 |

|   |   |   |   |   |   |     |     |     |
|---|---|---|---|---|---|-----|-----|-----|
| 1 | 0 | 1 | 1 | 0 | 1 | 124 | 7.5 | 135 |
| 1 | 0 | 1 | 1 | 0 | 1 | 125 | 7.5 | 135 |
| 1 | 0 | 1 | 1 | 0 | 1 | 126 | 7.5 | 135 |
| 1 | 0 | 1 | 1 | 0 | 1 | 127 | 7.5 | 135 |
| 1 | 0 | 1 | 1 | 0 | 1 | 128 | 7.5 | 135 |
| 1 | 0 | 1 | 1 | 0 | 1 | 129 | 7.5 | 135 |
| 1 | 0 | 1 | 1 | 0 | 1 | 130 | 7.5 | 135 |
| 1 | 0 | 1 | 1 | 0 | 1 | 131 | 7.5 | 135 |
| 1 | 0 | 1 | 1 | 0 | 1 | 132 | 7.5 | 135 |
| 1 | 0 | 1 | 1 | 0 | 1 | 133 | 7.5 | 135 |
| 1 | 0 | 1 | 1 | 0 | 1 | 134 | 7.5 | 135 |
| 1 | 0 | 1 | 1 | 0 | 1 | 135 | 7.5 | 135 |
| 1 | 0 | 1 | 1 | 0 | 1 | 136 | 7.5 | 135 |
| 1 | 0 | 1 | 1 | 0 | 1 | 137 | 7.5 | 135 |
| 1 | 0 | 1 | 1 | 0 | 1 | 138 | 7.5 | 135 |
| 1 | 0 | 1 | 1 | 0 | 1 | 139 | 7.5 | 135 |
| 1 | 0 | 1 | 1 | 0 | 1 | 140 | 7.5 | 135 |
| 1 | 0 | 1 | 1 | 0 | 1 | 141 | 7.5 | 135 |
| 1 | 0 | 1 | 1 | 0 | 1 | 142 | 7.5 | 135 |
| 1 | 0 | 1 | 1 | 0 | 1 | 143 | 7.5 | 135 |
| 1 | 0 | 1 | 1 | 0 | 1 | 144 | 7.5 | 135 |
| 1 | 0 | 1 | 1 | 0 | 1 | 145 | 7.5 | 135 |
| 1 | 0 | 1 | 1 | 0 | 1 | 146 | 7.5 | 135 |
| 1 | 0 | 1 | 1 | 0 | 1 | 147 | 7.5 | 135 |
| 1 | 0 | 1 | 1 | 0 | 1 | 148 | 7.5 | 135 |
| 1 | 0 | 1 | 1 | 0 | 1 | 149 | 7.5 | 135 |
| 1 | 0 | 1 | 1 | 0 | 1 | 150 | 7.5 | 135 |
| 1 | 0 | 1 | 1 | 0 | 1 | 151 | 7.5 | 135 |
| 1 | 0 | 1 | 1 | 0 | 1 | 152 | 7.5 | 135 |
| 1 | 0 | 1 | 1 | 0 | 1 | 153 | 7.5 | 135 |
| 1 | 0 | 1 | 1 | 0 | 1 | 154 | 7.5 | 135 |
| 1 | 0 | 1 | 1 | 0 | 1 | 155 | 7.5 | 135 |
| 1 | 0 | 1 | 1 | 0 | 1 | 156 | 7.5 | 135 |
| 1 | 0 | 1 | 1 | 0 | 1 | 157 | 7.5 | 135 |
| 1 | 0 | 1 | 1 | 0 | 1 | 158 | 7.5 | 135 |
| 1 | 0 | 1 | 1 | 0 | 1 | 159 | 7.5 | 135 |
| 1 | 0 | 1 | 1 | 0 | 1 | 160 | 7.5 | 135 |
| 1 | 0 | 1 | 1 | 0 | 1 | 161 | 7.5 | 135 |
| 1 | 0 | 1 | 1 | 0 | 1 | 162 | 7.5 | 135 |
| 1 | 0 | 1 | 1 | 0 | 1 | 163 | 7.5 | 135 |
| 1 | 0 | 1 | 1 | 0 | 1 | 164 | 7.5 | 135 |
| 1 | 0 | 1 | 1 | 0 | 1 | 165 | 7.5 | 135 |
| 1 | 0 | 1 | 1 | 0 | 1 | 166 | 7.5 | 135 |
| 1 | 0 | 1 | 1 | 0 | 1 | 167 | 7.5 | 135 |
| 1 | 0 | 1 | 1 | 0 | 1 | 168 | 7.5 | 135 |
| 1 | 0 | 1 | 1 | 0 | 1 | 169 | 7.5 | 135 |

|   |   |   |   |   |   |     |     |     |
|---|---|---|---|---|---|-----|-----|-----|
| 1 | 0 | 1 | 1 | 0 | 1 | 170 | 7.5 | 135 |
| 1 | 0 | 1 | 1 | 0 | 1 | 171 | 7.5 | 135 |
| 1 | 0 | 1 | 1 | 0 | 1 | 172 | 7.5 | 135 |
| 1 | 0 | 1 | 1 | 0 | 1 | 173 | 7.5 | 135 |
| 1 | 0 | 1 | 1 | 0 | 1 | 174 | 7.5 | 135 |
| 1 | 0 | 1 | 1 | 0 | 1 | 175 | 7.5 | 135 |
| 1 | 0 | 1 | 1 | 0 | 1 | 176 | 7.5 | 135 |
| 1 | 0 | 1 | 1 | 0 | 1 | 177 | 7.5 | 135 |
| 1 | 0 | 1 | 1 | 0 | 1 | 178 | 7.5 | 135 |
| 1 | 0 | 1 | 1 | 0 | 1 | 179 | 7.5 | 135 |
| 1 | 0 | 1 | 1 | 0 | 1 | 180 | 7.5 | 135 |
| 1 | 0 | 1 | 0 | 1 | 1 | 0   | 7.5 | 45  |
| 1 | 0 | 1 | 0 | 1 | 1 | 1   | 7.5 | 45  |
| 1 | 0 | 1 | 0 | 1 | 1 | 2   | 7.5 | 45  |
| 1 | 0 | 1 | 0 | 1 | 1 | 3   | 7.5 | 45  |
| 1 | 0 | 1 | 0 | 1 | 1 | 4   | 7.5 | 45  |
| 1 | 0 | 1 | 0 | 1 | 1 | 5   | 7.5 | 45  |
| 1 | 0 | 1 | 0 | 1 | 1 | 6   | 7.5 | 45  |
| 1 | 0 | 1 | 0 | 1 | 1 | 7   | 7.5 | 45  |
| 1 | 0 | 1 | 0 | 1 | 1 | 8   | 7.5 | 45  |
| 1 | 0 | 1 | 0 | 1 | 1 | 9   | 7.5 | 45  |
| 1 | 0 | 1 | 0 | 1 | 1 | 10  | 7.5 | 45  |
| 1 | 0 | 1 | 0 | 1 | 1 | 11  | 7.5 | 45  |
| 1 | 0 | 1 | 0 | 1 | 1 | 12  | 7.5 | 45  |
| 1 | 0 | 1 | 0 | 1 | 1 | 13  | 7.5 | 45  |
| 1 | 0 | 1 | 0 | 1 | 1 | 14  | 7.5 | 45  |
| 1 | 0 | 1 | 0 | 1 | 1 | 15  | 7.5 | 45  |
| 1 | 0 | 1 | 0 | 1 | 1 | 16  | 7.5 | 45  |
| 1 | 0 | 1 | 0 | 1 | 1 | 17  | 7.5 | 45  |
| 1 | 0 | 1 | 0 | 1 | 1 | 18  | 7.5 | 45  |
| 1 | 0 | 1 | 0 | 1 | 1 | 19  | 7.5 | 45  |
| 1 | 0 | 1 | 0 | 1 | 1 | 20  | 7.5 | 45  |
| 1 | 0 | 1 | 0 | 1 | 1 | 21  | 7.5 | 45  |
| 1 | 0 | 1 | 0 | 1 | 1 | 22  | 7.5 | 45  |
| 1 | 0 | 1 | 0 | 1 | 1 | 23  | 7.5 | 45  |
| 1 | 0 | 1 | 0 | 1 | 1 | 24  | 7.5 | 45  |
| 1 | 0 | 1 | 0 | 1 | 1 | 25  | 7.5 | 45  |
| 1 | 0 | 1 | 0 | 1 | 1 | 26  | 7.5 | 45  |
| 1 | 0 | 1 | 0 | 1 | 1 | 27  | 7.5 | 45  |
| 1 | 0 | 1 | 0 | 1 | 1 | 28  | 7.5 | 45  |
| 1 | 0 | 1 | 0 | 1 | 1 | 29  | 7.5 | 45  |
| 1 | 0 | 1 | 0 | 1 | 1 | 30  | 7.5 | 30  |
| 1 | 0 | 1 | 0 | 1 | 1 | 31  | 7.5 | 45  |
| 1 | 0 | 1 | 0 | 1 | 1 | 32  | 7.5 | 45  |
| 1 | 0 | 1 | 0 | 1 | 1 | 33  | 7.5 | 45  |
| 1 | 0 | 1 | 0 | 1 | 1 | 34  | 7.5 | 45  |

|   |   |   |   |   |   |    |     |     |
|---|---|---|---|---|---|----|-----|-----|
| 1 | 0 | 1 | 0 | 1 | 1 | 35 | 7.5 | 45  |
| 1 | 0 | 1 | 0 | 1 | 1 | 36 | 7.5 | 45  |
| 1 | 0 | 1 | 0 | 1 | 1 | 37 | 7.5 | 45  |
| 1 | 0 | 1 | 0 | 1 | 1 | 38 | 7.5 | 45  |
| 1 | 0 | 1 | 0 | 1 | 1 | 39 | 7.5 | 45  |
| 1 | 0 | 1 | 0 | 1 | 1 | 40 | 7.5 | 45  |
| 1 | 0 | 1 | 0 | 1 | 1 | 41 | 7.5 | 45  |
| 1 | 0 | 1 | 0 | 1 | 1 | 42 | 7.5 | 45  |
| 1 | 0 | 1 | 0 | 1 | 1 | 43 | 7.5 | 45  |
| 1 | 0 | 1 | 0 | 1 | 1 | 44 | 7.5 | 45  |
| 1 | 0 | 1 | 0 | 1 | 1 | 45 | 7.5 | 45  |
| 1 | 0 | 1 | 0 | 1 | 1 | 46 | 7.5 | 45  |
| 1 | 0 | 1 | 0 | 1 | 1 | 47 | 7.5 | 45  |
| 1 | 0 | 1 | 0 | 1 | 1 | 48 | 7.5 | 45  |
| 1 | 0 | 1 | 0 | 1 | 1 | 49 | 7.5 | 45  |
| 1 | 0 | 1 | 0 | 1 | 1 | 50 | 7.5 | 45  |
| 1 | 0 | 1 | 0 | 1 | 1 | 51 | 7.5 | 45  |
| 1 | 0 | 1 | 0 | 1 | 1 | 52 | 7.5 | 45  |
| 1 | 0 | 1 | 0 | 1 | 1 | 53 | 7.5 | 45  |
| 1 | 0 | 1 | 0 | 1 | 1 | 54 | 7.5 | 45  |
| 1 | 0 | 1 | 0 | 1 | 1 | 55 | 7.5 | 45  |
| 1 | 0 | 1 | 0 | 1 | 1 | 56 | 7.5 | 45  |
| 1 | 0 | 1 | 0 | 1 | 1 | 57 | 7.5 | 45  |
| 1 | 0 | 1 | 0 | 1 | 1 | 58 | 7.5 | 45  |
| 1 | 0 | 1 | 0 | 1 | 1 | 59 | 7.5 | 45  |
| 1 | 0 | 1 | 0 | 1 | 1 | 60 | 7.5 | 45  |
| 1 | 0 | 1 | 0 | 1 | 1 | 61 | 7.5 | 45  |
| 1 | 0 | 1 | 0 | 1 | 1 | 62 | 7.5 | 45  |
| 1 | 0 | 1 | 0 | 1 | 1 | 63 | 7.5 | 45  |
| 1 | 0 | 1 | 0 | 1 | 1 | 64 | 7.5 | 45  |
| 1 | 0 | 1 | 0 | 1 | 1 | 65 | 7.5 | 45  |
| 1 | 0 | 1 | 0 | 1 | 1 | 66 | 7.5 | 45  |
| 1 | 0 | 1 | 0 | 1 | 1 | 67 | 7.5 | 45  |
| 1 | 0 | 1 | 0 | 1 | 1 | 68 | 7.5 | 45  |
| 1 | 0 | 1 | 0 | 1 | 1 | 69 | 7.5 | 45  |
| 1 | 0 | 1 | 0 | 1 | 1 | 70 | 7.5 | 45  |
| 1 | 0 | 1 | 0 | 1 | 1 | 71 | 7.5 | 45  |
| 1 | 0 | 1 | 0 | 1 | 1 | 72 | 7.5 | 45  |
| 1 | 0 | 1 | 0 | 1 | 1 | 73 | 7.5 | 45  |
| 1 | 0 | 1 | 0 | 1 | 1 | 74 | 7.5 | 45  |
| 1 | 0 | 1 | 0 | 1 | 1 | 75 | 7.5 | 45  |
| 1 | 0 | 1 | 0 | 1 | 1 | 76 | 7.5 | 105 |
| 1 | 0 | 1 | 0 | 1 | 1 | 77 | 7.5 | 105 |
| 1 | 0 | 1 | 0 | 1 | 1 | 78 | 7.5 | 105 |
| 1 | 0 | 1 | 0 | 1 | 1 | 79 | 7.5 | 105 |
| 1 | 0 | 1 | 0 | 1 | 1 | 80 | 7.5 | 105 |

|   |   |   |   |   |   |     |     |     |
|---|---|---|---|---|---|-----|-----|-----|
| 1 | 0 | 1 | 0 | 1 | 1 | 81  | 7.5 | 105 |
| 1 | 0 | 1 | 0 | 1 | 1 | 82  | 7.5 | 105 |
| 1 | 0 | 1 | 0 | 1 | 1 | 83  | 7.5 | 105 |
| 1 | 0 | 1 | 0 | 1 | 1 | 84  | 7.5 | 105 |
| 1 | 0 | 1 | 0 | 1 | 1 | 85  | 7.5 | 105 |
| 1 | 0 | 1 | 0 | 1 | 1 | 86  | 7.5 | 105 |
| 1 | 0 | 1 | 0 | 1 | 1 | 87  | 7.5 | 105 |
| 1 | 0 | 1 | 0 | 1 | 1 | 88  | 7.5 | 105 |
| 1 | 0 | 1 | 0 | 1 | 1 | 89  | 7.5 | 105 |
| 1 | 0 | 1 | 0 | 1 | 1 | 90  | 7.5 | 105 |
| 1 | 0 | 1 | 0 | 1 | 1 | 91  | 7.5 | 105 |
| 1 | 0 | 1 | 0 | 1 | 1 | 92  | 7.5 | 105 |
| 1 | 0 | 1 | 0 | 1 | 1 | 93  | 7.5 | 105 |
| 1 | 0 | 1 | 0 | 1 | 1 | 94  | 7.5 | 105 |
| 1 | 0 | 1 | 0 | 1 | 1 | 95  | 7.5 | 105 |
| 1 | 0 | 1 | 0 | 1 | 1 | 96  | 7.5 | 105 |
| 1 | 0 | 1 | 0 | 1 | 1 | 97  | 7.5 | 105 |
| 1 | 0 | 1 | 0 | 1 | 1 | 98  | 7.5 | 105 |
| 1 | 0 | 1 | 0 | 1 | 1 | 99  | 7.5 | 105 |
| 1 | 0 | 1 | 0 | 1 | 1 | 100 | 7.5 | 105 |
| 1 | 0 | 1 | 0 | 1 | 1 | 101 | 7.5 | 105 |
| 1 | 0 | 1 | 0 | 1 | 1 | 102 | 7.5 | 105 |
| 1 | 0 | 1 | 0 | 1 | 1 | 103 | 7.5 | 105 |
| 1 | 0 | 1 | 0 | 1 | 1 | 104 | 7.5 | 105 |
| 1 | 0 | 1 | 0 | 1 | 1 | 105 | 7.5 | 105 |
| 1 | 0 | 1 | 0 | 1 | 1 | 106 | 7.5 | 105 |
| 1 | 0 | 1 | 0 | 1 | 1 | 107 | 7.5 | 105 |
| 1 | 0 | 1 | 0 | 1 | 1 | 108 | 7.5 | 105 |
| 1 | 0 | 1 | 0 | 1 | 1 | 109 | 7.5 | 105 |
| 1 | 0 | 1 | 0 | 1 | 1 | 110 | 7.5 | 105 |
| 1 | 0 | 1 | 0 | 1 | 1 | 111 | 7.5 | 105 |
| 1 | 0 | 1 | 0 | 1 | 1 | 112 | 7.5 | 105 |
| 1 | 0 | 1 | 0 | 1 | 1 | 113 | 7.5 | 105 |
| 1 | 0 | 1 | 0 | 1 | 1 | 114 | 7.5 | 105 |
| 1 | 0 | 1 | 0 | 1 | 1 | 115 | 7.5 | 105 |
| 1 | 0 | 1 | 0 | 1 | 1 | 116 | 7.5 | 105 |
| 1 | 0 | 1 | 0 | 1 | 1 | 117 | 7.5 | 105 |
| 1 | 0 | 1 | 0 | 1 | 1 | 118 | 7.5 | 105 |
| 1 | 0 | 1 | 0 | 1 | 1 | 119 | 7.5 | 105 |
| 1 | 0 | 1 | 0 | 1 | 1 | 120 | 7.5 | 105 |
| 1 | 0 | 1 | 0 | 1 | 1 | 121 | 7.5 | 105 |
| 1 | 0 | 1 | 0 | 1 | 1 | 122 | 7.5 | 105 |
| 1 | 0 | 1 | 0 | 1 | 1 | 123 | 7.5 | 105 |
| 1 | 0 | 1 | 0 | 1 | 1 | 124 | 7.5 | 105 |
| 1 | 0 | 1 | 0 | 1 | 1 | 125 | 7.5 | 105 |
| 1 | 0 | 1 | 0 | 1 | 1 | 126 | 7.5 | 105 |

|   |   |   |   |   |   |     |     |     |
|---|---|---|---|---|---|-----|-----|-----|
| 1 | 0 | 1 | 0 | 1 | 1 | 127 | 7.5 | 105 |
| 1 | 0 | 1 | 0 | 1 | 1 | 128 | 7.5 | 105 |
| 1 | 0 | 1 | 0 | 1 | 1 | 129 | 7.5 | 105 |
| 1 | 0 | 1 | 0 | 1 | 1 | 130 | 7.5 | 105 |
| 1 | 0 | 1 | 0 | 1 | 1 | 131 | 7.5 | 105 |
| 1 | 0 | 1 | 0 | 1 | 1 | 132 | 7.5 | 105 |
| 1 | 0 | 1 | 0 | 1 | 1 | 133 | 7.5 | 105 |
| 1 | 0 | 1 | 0 | 1 | 1 | 134 | 7.5 | 105 |
| 1 | 0 | 1 | 0 | 1 | 1 | 135 | 7.5 | 105 |
| 1 | 0 | 1 | 0 | 1 | 1 | 136 | 7.5 | 105 |
| 1 | 0 | 1 | 0 | 1 | 1 | 137 | 7.5 | 105 |
| 1 | 0 | 1 | 0 | 1 | 1 | 138 | 7.5 | 105 |
| 1 | 0 | 1 | 0 | 1 | 1 | 139 | 7.5 | 105 |
| 1 | 0 | 1 | 0 | 1 | 1 | 140 | 7.5 | 105 |
| 1 | 0 | 1 | 0 | 1 | 1 | 141 | 7.5 | 105 |
| 1 | 0 | 1 | 0 | 1 | 1 | 142 | 7.5 | 105 |
| 1 | 0 | 1 | 0 | 1 | 1 | 143 | 7.5 | 105 |
| 1 | 0 | 1 | 0 | 1 | 1 | 144 | 7.5 | 105 |
| 1 | 0 | 1 | 0 | 1 | 1 | 145 | 7.5 | 105 |
| 1 | 0 | 1 | 0 | 1 | 1 | 146 | 7.5 | 105 |
| 1 | 0 | 1 | 0 | 1 | 1 | 147 | 7.5 | 105 |
| 1 | 0 | 1 | 0 | 1 | 1 | 148 | 7.5 | 105 |
| 1 | 0 | 1 | 0 | 1 | 1 | 149 | 7.5 | 105 |
| 1 | 0 | 1 | 0 | 1 | 1 | 150 | 7.5 | 105 |
| 1 | 0 | 1 | 0 | 1 | 1 | 151 | 7.5 | 105 |
| 1 | 0 | 1 | 0 | 1 | 1 | 152 | 7.5 | 105 |
| 1 | 0 | 1 | 0 | 1 | 1 | 153 | 7.5 | 105 |
| 1 | 0 | 1 | 0 | 1 | 1 | 154 | 7.5 | 105 |
| 1 | 0 | 1 | 0 | 1 | 1 | 155 | 7.5 | 105 |
| 1 | 0 | 1 | 0 | 1 | 1 | 156 | 7.5 | 105 |
| 1 | 0 | 1 | 0 | 1 | 1 | 157 | 7.5 | 105 |
| 1 | 0 | 1 | 0 | 1 | 1 | 158 | 7.5 | 105 |
| 1 | 0 | 1 | 0 | 1 | 1 | 159 | 7.5 | 105 |
| 1 | 0 | 1 | 0 | 1 | 1 | 160 | 7.5 | 105 |
| 1 | 0 | 1 | 0 | 1 | 1 | 161 | 7.5 | 105 |
| 1 | 0 | 1 | 0 | 1 | 1 | 162 | 7.5 | 105 |
| 1 | 0 | 1 | 0 | 1 | 1 | 163 | 7.5 | 105 |
| 1 | 0 | 1 | 0 | 1 | 1 | 164 | 7.5 | 105 |
| 1 | 0 | 1 | 0 | 1 | 1 | 165 | 7.5 | 105 |
| 1 | 0 | 1 | 0 | 1 | 1 | 166 | 7.5 | 105 |
| 1 | 0 | 1 | 0 | 1 | 1 | 167 | 7.5 | 105 |
| 1 | 0 | 1 | 0 | 1 | 1 | 168 | 7.5 | 105 |
| 1 | 0 | 1 | 0 | 1 | 1 | 169 | 7.5 | 105 |
| 1 | 0 | 1 | 0 | 1 | 1 | 170 | 7.5 | 105 |
| 1 | 0 | 1 | 0 | 1 | 1 | 171 | 7.5 | 105 |
| 1 | 0 | 1 | 0 | 1 | 1 | 172 | 7.5 | 105 |

|   |   |   |   |   |   |     |     |     |
|---|---|---|---|---|---|-----|-----|-----|
| 1 | 0 | 1 | 0 | 1 | 1 | 173 | 7.5 | 105 |
| 1 | 0 | 1 | 0 | 1 | 1 | 174 | 7.5 | 105 |
| 1 | 0 | 1 | 0 | 1 | 1 | 175 | 7.5 | 105 |
| 1 | 0 | 1 | 0 | 1 | 1 | 176 | 7.5 | 105 |
| 1 | 0 | 1 | 0 | 1 | 1 | 177 | 7.5 | 105 |
| 1 | 0 | 1 | 0 | 1 | 1 | 178 | 7.5 | 105 |
| 1 | 0 | 1 | 0 | 1 | 1 | 179 | 7.5 | 105 |
| 1 | 0 | 1 | 0 | 1 | 1 | 180 | 7.5 | 105 |
| 1 | 0 | 0 | 1 | 1 | 1 | 0   | 7.5 | 45  |
| 1 | 0 | 0 | 1 | 1 | 1 | 1   | 7.5 | 45  |
| 1 | 0 | 0 | 1 | 1 | 1 | 2   | 7.5 | 45  |
| 1 | 0 | 0 | 1 | 1 | 1 | 3   | 7.5 | 45  |
| 1 | 0 | 0 | 1 | 1 | 1 | 4   | 7.5 | 45  |
| 1 | 0 | 0 | 1 | 1 | 1 | 5   | 7.5 | 45  |
| 1 | 0 | 0 | 1 | 1 | 1 | 6   | 7.5 | 45  |
| 1 | 0 | 0 | 1 | 1 | 1 | 7   | 7.5 | 45  |
| 1 | 0 | 0 | 1 | 1 | 1 | 8   | 7.5 | 45  |
| 1 | 0 | 0 | 1 | 1 | 1 | 9   | 7.5 | 45  |
| 1 | 0 | 0 | 1 | 1 | 1 | 10  | 7.5 | 45  |
| 1 | 0 | 0 | 1 | 1 | 1 | 11  | 7.5 | 45  |
| 1 | 0 | 0 | 1 | 1 | 1 | 12  | 7.5 | 45  |
| 1 | 0 | 0 | 1 | 1 | 1 | 13  | 7.5 | 45  |
| 1 | 0 | 0 | 1 | 1 | 1 | 14  | 7.5 | 45  |
| 1 | 0 | 0 | 1 | 1 | 1 | 15  | 7.5 | 45  |
| 1 | 0 | 0 | 1 | 1 | 1 | 16  | 7.5 | 45  |
| 1 | 0 | 0 | 1 | 1 | 1 | 17  | 7.5 | 45  |
| 1 | 0 | 0 | 1 | 1 | 1 | 18  | 7.5 | 45  |
| 1 | 0 | 0 | 1 | 1 | 1 | 19  | 7.5 | 45  |
| 1 | 0 | 0 | 1 | 1 | 1 | 20  | 7.5 | 45  |
| 1 | 0 | 0 | 1 | 1 | 1 | 21  | 7.5 | 45  |
| 1 | 0 | 0 | 1 | 1 | 1 | 22  | 7.5 | 45  |
| 1 | 0 | 0 | 1 | 1 | 1 | 23  | 7.5 | 45  |
| 1 | 0 | 0 | 1 | 1 | 1 | 24  | 7.5 | 45  |
| 1 | 0 | 0 | 1 | 1 | 1 | 25  | 7.5 | 45  |
| 1 | 0 | 0 | 1 | 1 | 1 | 26  | 7.5 | 45  |
| 1 | 0 | 0 | 1 | 1 | 1 | 27  | 7.5 | 45  |
| 1 | 0 | 0 | 1 | 1 | 1 | 28  | 7.5 | 45  |
| 1 | 0 | 0 | 1 | 1 | 1 | 29  | 7.5 | 45  |
| 1 | 0 | 0 | 1 | 1 | 1 | 30  | 7.5 | 45  |
| 1 | 0 | 0 | 1 | 1 | 1 | 31  | 7.5 | 45  |
| 1 | 0 | 0 | 1 | 1 | 1 | 32  | 7.5 | 45  |
| 1 | 0 | 0 | 1 | 1 | 1 | 33  | 7.5 | 45  |
| 1 | 0 | 0 | 1 | 1 | 1 | 34  | 7.5 | 45  |
| 1 | 0 | 0 | 1 | 1 | 1 | 35  | 7.5 | 45  |
| 1 | 0 | 0 | 1 | 1 | 1 | 36  | 7.5 | 45  |
| 1 | 0 | 0 | 1 | 1 | 1 | 37  | 7.5 | 45  |

|   |   |   |   |   |   |    |     |    |
|---|---|---|---|---|---|----|-----|----|
| 1 | 0 | 0 | 1 | 1 | 1 | 38 | 7.5 | 45 |
| 1 | 0 | 0 | 1 | 1 | 1 | 39 | 7.5 | 45 |
| 1 | 0 | 0 | 1 | 1 | 1 | 40 | 7.5 | 45 |
| 1 | 0 | 0 | 1 | 1 | 1 | 41 | 7.5 | 45 |
| 1 | 0 | 0 | 1 | 1 | 1 | 42 | 7.5 | 45 |
| 1 | 0 | 0 | 1 | 1 | 1 | 43 | 7.5 | 45 |
| 1 | 0 | 0 | 1 | 1 | 1 | 44 | 7.5 | 45 |
| 1 | 0 | 0 | 1 | 1 | 1 | 45 | 7.5 | 45 |
| 1 | 0 | 0 | 1 | 1 | 1 | 46 | 7.5 | 45 |
| 1 | 0 | 0 | 1 | 1 | 1 | 47 | 7.5 | 45 |
| 1 | 0 | 0 | 1 | 1 | 1 | 48 | 7.5 | 45 |
| 1 | 0 | 0 | 1 | 1 | 1 | 49 | 7.5 | 45 |
| 1 | 0 | 0 | 1 | 1 | 1 | 50 | 7.5 | 45 |
| 1 | 0 | 0 | 1 | 1 | 1 | 51 | 7.5 | 45 |
| 1 | 0 | 0 | 1 | 1 | 1 | 52 | 7.5 | 45 |
| 1 | 0 | 0 | 1 | 1 | 1 | 53 | 7.5 | 45 |
| 1 | 0 | 0 | 1 | 1 | 1 | 54 | 7.5 | 45 |
| 1 | 0 | 0 | 1 | 1 | 1 | 55 | 7.5 | 45 |
| 1 | 0 | 0 | 1 | 1 | 1 | 56 | 7.5 | 45 |
| 1 | 0 | 0 | 1 | 1 | 1 | 57 | 7.5 | 45 |
| 1 | 0 | 0 | 1 | 1 | 1 | 58 | 7.5 | 45 |
| 1 | 0 | 0 | 1 | 1 | 1 | 59 | 7.5 | 45 |
| 1 | 0 | 0 | 1 | 1 | 1 | 60 | 7.5 | 60 |
| 1 | 0 | 0 | 1 | 1 | 1 | 61 | 7.5 | 75 |
| 1 | 0 | 0 | 1 | 1 | 1 | 62 | 7.5 | 75 |
| 1 | 0 | 0 | 1 | 1 | 1 | 63 | 7.5 | 75 |
| 1 | 0 | 0 | 1 | 1 | 1 | 64 | 7.5 | 75 |
| 1 | 0 | 0 | 1 | 1 | 1 | 65 | 7.5 | 75 |
| 1 | 0 | 0 | 1 | 1 | 1 | 66 | 7.5 | 75 |
| 1 | 0 | 0 | 1 | 1 | 1 | 67 | 7.5 | 75 |
| 1 | 0 | 0 | 1 | 1 | 1 | 68 | 7.5 | 75 |
| 1 | 0 | 0 | 1 | 1 | 1 | 69 | 7.5 | 75 |
| 1 | 0 | 0 | 1 | 1 | 1 | 70 | 7.5 | 75 |
| 1 | 0 | 0 | 1 | 1 | 1 | 71 | 7.5 | 75 |
| 1 | 0 | 0 | 1 | 1 | 1 | 72 | 7.5 | 75 |
| 1 | 0 | 0 | 1 | 1 | 1 | 73 | 7.5 | 75 |
| 1 | 0 | 0 | 1 | 1 | 1 | 74 | 7.5 | 75 |
| 1 | 0 | 0 | 1 | 1 | 1 | 75 | 7.5 | 75 |
| 1 | 0 | 0 | 1 | 1 | 1 | 76 | 7.5 | 75 |
| 1 | 0 | 0 | 1 | 1 | 1 | 77 | 7.5 | 75 |
| 1 | 0 | 0 | 1 | 1 | 1 | 78 | 7.5 | 75 |
| 1 | 0 | 0 | 1 | 1 | 1 | 79 | 7.5 | 75 |
| 1 | 0 | 0 | 1 | 1 | 1 | 80 | 7.5 | 75 |
| 1 | 0 | 0 | 1 | 1 | 1 | 81 | 7.5 | 75 |
| 1 | 0 | 0 | 1 | 1 | 1 | 82 | 7.5 | 75 |
| 1 | 0 | 0 | 1 | 1 | 1 | 83 | 7.5 | 75 |

|   |   |   |   |   |   |     |     |    |
|---|---|---|---|---|---|-----|-----|----|
| 1 | 0 | 0 | 1 | 1 | 1 | 84  | 7.5 | 75 |
| 1 | 0 | 0 | 1 | 1 | 1 | 85  | 7.5 | 75 |
| 1 | 0 | 0 | 1 | 1 | 1 | 86  | 7.5 | 75 |
| 1 | 0 | 0 | 1 | 1 | 1 | 87  | 7.5 | 75 |
| 1 | 0 | 0 | 1 | 1 | 1 | 88  | 7.5 | 75 |
| 1 | 0 | 0 | 1 | 1 | 1 | 89  | 7.5 | 75 |
| 1 | 0 | 0 | 1 | 1 | 1 | 90  | 7.5 | 75 |
| 1 | 0 | 0 | 1 | 1 | 1 | 91  | 7.5 | 75 |
| 1 | 0 | 0 | 1 | 1 | 1 | 92  | 7.5 | 75 |
| 1 | 0 | 0 | 1 | 1 | 1 | 93  | 7.5 | 75 |
| 1 | 0 | 0 | 1 | 1 | 1 | 94  | 7.5 | 75 |
| 1 | 0 | 0 | 1 | 1 | 1 | 95  | 7.5 | 75 |
| 1 | 0 | 0 | 1 | 1 | 1 | 96  | 7.5 | 75 |
| 1 | 0 | 0 | 1 | 1 | 1 | 97  | 7.5 | 75 |
| 1 | 0 | 0 | 1 | 1 | 1 | 98  | 7.5 | 75 |
| 1 | 0 | 0 | 1 | 1 | 1 | 99  | 7.5 | 75 |
| 1 | 0 | 0 | 1 | 1 | 1 | 100 | 7.5 | 75 |
| 1 | 0 | 0 | 1 | 1 | 1 | 101 | 7.5 | 75 |
| 1 | 0 | 0 | 1 | 1 | 1 | 102 | 7.5 | 75 |
| 1 | 0 | 0 | 1 | 1 | 1 | 103 | 7.5 | 75 |
| 1 | 0 | 0 | 1 | 1 | 1 | 104 | 7.5 | 75 |
| 1 | 0 | 0 | 1 | 1 | 1 | 105 | 7.5 | 75 |
| 1 | 0 | 0 | 1 | 1 | 1 | 106 | 7.5 | 75 |
| 1 | 0 | 0 | 1 | 1 | 1 | 107 | 7.5 | 75 |
| 1 | 0 | 0 | 1 | 1 | 1 | 108 | 7.5 | 75 |
| 1 | 0 | 0 | 1 | 1 | 1 | 109 | 7.5 | 75 |
| 1 | 0 | 0 | 1 | 1 | 1 | 110 | 7.5 | 75 |
| 1 | 0 | 0 | 1 | 1 | 1 | 111 | 7.5 | 75 |
| 1 | 0 | 0 | 1 | 1 | 1 | 112 | 7.5 | 75 |
| 1 | 0 | 0 | 1 | 1 | 1 | 113 | 7.5 | 75 |
| 1 | 0 | 0 | 1 | 1 | 1 | 114 | 7.5 | 75 |
| 1 | 0 | 0 | 1 | 1 | 1 | 115 | 7.5 | 75 |
| 1 | 0 | 0 | 1 | 1 | 1 | 116 | 7.5 | 75 |
| 1 | 0 | 0 | 1 | 1 | 1 | 117 | 7.5 | 75 |
| 1 | 0 | 0 | 1 | 1 | 1 | 118 | 7.5 | 75 |
| 1 | 0 | 0 | 1 | 1 | 1 | 119 | 7.5 | 75 |
| 1 | 0 | 0 | 1 | 1 | 1 | 120 | 7.5 | 75 |
| 1 | 0 | 0 | 1 | 1 | 1 | 121 | 7.5 | 75 |
| 1 | 0 | 0 | 1 | 1 | 1 | 122 | 7.5 | 75 |
| 1 | 0 | 0 | 1 | 1 | 1 | 123 | 7.5 | 75 |
| 1 | 0 | 0 | 1 | 1 | 1 | 124 | 7.5 | 75 |
| 1 | 0 | 0 | 1 | 1 | 1 | 125 | 7.5 | 75 |
| 1 | 0 | 0 | 1 | 1 | 1 | 126 | 7.5 | 75 |
| 1 | 0 | 0 | 1 | 1 | 1 | 127 | 7.5 | 75 |
| 1 | 0 | 0 | 1 | 1 | 1 | 128 | 7.5 | 75 |
| 1 | 0 | 0 | 1 | 1 | 1 | 129 | 7.5 | 75 |

|   |   |   |   |   |   |     |     |    |
|---|---|---|---|---|---|-----|-----|----|
| 1 | 0 | 0 | 1 | 1 | 1 | 130 | 7.5 | 75 |
| 1 | 0 | 0 | 1 | 1 | 1 | 131 | 7.5 | 75 |
| 1 | 0 | 0 | 1 | 1 | 1 | 132 | 7.5 | 75 |
| 1 | 0 | 0 | 1 | 1 | 1 | 133 | 7.5 | 75 |
| 1 | 0 | 0 | 1 | 1 | 1 | 134 | 7.5 | 75 |
| 1 | 0 | 0 | 1 | 1 | 1 | 135 | 7.5 | 75 |
| 1 | 0 | 0 | 1 | 1 | 1 | 136 | 7.5 | 75 |
| 1 | 0 | 0 | 1 | 1 | 1 | 137 | 7.5 | 75 |
| 1 | 0 | 0 | 1 | 1 | 1 | 138 | 7.5 | 75 |
| 1 | 0 | 0 | 1 | 1 | 1 | 139 | 7.5 | 75 |
| 1 | 0 | 0 | 1 | 1 | 1 | 140 | 7.5 | 75 |
| 1 | 0 | 0 | 1 | 1 | 1 | 141 | 7.5 | 75 |
| 1 | 0 | 0 | 1 | 1 | 1 | 142 | 7.5 | 75 |
| 1 | 0 | 0 | 1 | 1 | 1 | 143 | 7.5 | 75 |
| 1 | 0 | 0 | 1 | 1 | 1 | 144 | 7.5 | 75 |
| 1 | 0 | 0 | 1 | 1 | 1 | 145 | 7.5 | 75 |
| 1 | 0 | 0 | 1 | 1 | 1 | 146 | 7.5 | 75 |
| 1 | 0 | 0 | 1 | 1 | 1 | 147 | 7.5 | 75 |
| 1 | 0 | 0 | 1 | 1 | 1 | 148 | 7.5 | 75 |
| 1 | 0 | 0 | 1 | 1 | 1 | 149 | 7.5 | 75 |
| 1 | 0 | 0 | 1 | 1 | 1 | 150 | 7.5 | 75 |
| 1 | 0 | 0 | 1 | 1 | 1 | 151 | 7.5 | 75 |
| 1 | 0 | 0 | 1 | 1 | 1 | 152 | 7.5 | 75 |
| 1 | 0 | 0 | 1 | 1 | 1 | 153 | 7.5 | 75 |
| 1 | 0 | 0 | 1 | 1 | 1 | 154 | 7.5 | 75 |
| 1 | 0 | 0 | 1 | 1 | 1 | 155 | 7.5 | 75 |
| 1 | 0 | 0 | 1 | 1 | 1 | 156 | 7.5 | 75 |
| 1 | 0 | 0 | 1 | 1 | 1 | 157 | 7.5 | 75 |
| 1 | 0 | 0 | 1 | 1 | 1 | 158 | 7.5 | 75 |
| 1 | 0 | 0 | 1 | 1 | 1 | 159 | 7.5 | 75 |
| 1 | 0 | 0 | 1 | 1 | 1 | 160 | 7.5 | 75 |
| 1 | 0 | 0 | 1 | 1 | 1 | 161 | 7.5 | 75 |
| 1 | 0 | 0 | 1 | 1 | 1 | 162 | 7.5 | 75 |
| 1 | 0 | 0 | 1 | 1 | 1 | 163 | 7.5 | 75 |
| 1 | 0 | 0 | 1 | 1 | 1 | 164 | 7.5 | 75 |
| 1 | 0 | 0 | 1 | 1 | 1 | 165 | 7.5 | 75 |
| 1 | 0 | 0 | 1 | 1 | 1 | 166 | 7.5 | 75 |
| 1 | 0 | 0 | 1 | 1 | 1 | 167 | 7.5 | 75 |
| 1 | 0 | 0 | 1 | 1 | 1 | 168 | 7.5 | 75 |
| 1 | 0 | 0 | 1 | 1 | 1 | 169 | 7.5 | 75 |
| 1 | 0 | 0 | 1 | 1 | 1 | 170 | 7.5 | 75 |
| 1 | 0 | 0 | 1 | 1 | 1 | 171 | 7.5 | 75 |
| 1 | 0 | 0 | 1 | 1 | 1 | 172 | 7.5 | 75 |
| 1 | 0 | 0 | 1 | 1 | 1 | 173 | 7.5 | 75 |
| 1 | 0 | 0 | 1 | 1 | 1 | 174 | 7.5 | 75 |
| 1 | 0 | 0 | 1 | 1 | 1 | 175 | 7.5 | 75 |

|   |   |   |   |   |   |     |     |     |
|---|---|---|---|---|---|-----|-----|-----|
| 1 | 0 | 0 | 1 | 1 | 1 | 176 | 7.5 | 75  |
| 1 | 0 | 0 | 1 | 1 | 1 | 177 | 7.5 | 75  |
| 1 | 0 | 0 | 1 | 1 | 1 | 178 | 7.5 | 75  |
| 1 | 0 | 0 | 1 | 1 | 1 | 179 | 7.5 | 75  |
| 1 | 0 | 0 | 1 | 1 | 1 | 180 | 7.5 | 75  |
| 1 | 1 | 1 | 1 | 1 | 0 | 0   | 7.5 | 165 |
| 1 | 1 | 1 | 1 | 1 | 0 | 1   | 7.5 | 165 |
| 1 | 1 | 1 | 1 | 1 | 0 | 2   | 7.5 | 165 |
| 1 | 1 | 1 | 1 | 1 | 0 | 3   | 7.5 | 165 |
| 1 | 1 | 1 | 1 | 1 | 0 | 4   | 7.5 | 165 |
| 1 | 1 | 1 | 1 | 1 | 0 | 5   | 7.5 | 165 |
| 1 | 1 | 1 | 1 | 1 | 0 | 6   | 7.5 | 165 |
| 1 | 1 | 1 | 1 | 1 | 0 | 7   | 7.5 | 165 |
| 1 | 1 | 1 | 1 | 1 | 0 | 8   | 7.5 | 165 |
| 1 | 1 | 1 | 1 | 1 | 0 | 9   | 7.5 | 165 |
| 1 | 1 | 1 | 1 | 1 | 0 | 10  | 7.5 | 165 |
| 1 | 1 | 1 | 1 | 1 | 0 | 11  | 7.5 | 165 |
| 1 | 1 | 1 | 1 | 1 | 0 | 12  | 7.5 | 165 |
| 1 | 1 | 1 | 1 | 1 | 0 | 13  | 7.5 | 165 |
| 1 | 1 | 1 | 1 | 1 | 0 | 14  | 7.5 | 165 |
| 1 | 1 | 1 | 1 | 1 | 0 | 15  | 7.5 | 165 |
| 1 | 1 | 1 | 1 | 1 | 0 | 16  | 7.5 | 165 |
| 1 | 1 | 1 | 1 | 1 | 0 | 17  | 7.5 | 165 |
| 1 | 1 | 1 | 1 | 1 | 0 | 18  | 7.5 | 165 |
| 1 | 1 | 1 | 1 | 1 | 0 | 19  | 7.5 | 165 |
| 1 | 1 | 1 | 1 | 1 | 0 | 20  | 7.5 | 165 |
| 1 | 1 | 1 | 1 | 1 | 0 | 21  | 7.5 | 165 |
| 1 | 1 | 1 | 1 | 1 | 0 | 22  | 7.5 | 165 |
| 1 | 1 | 1 | 1 | 1 | 0 | 23  | 7.5 | 165 |
| 1 | 1 | 1 | 1 | 1 | 0 | 24  | 7.5 | 165 |
| 1 | 1 | 1 | 1 | 1 | 0 | 25  | 7.5 | 165 |
| 1 | 1 | 1 | 1 | 1 | 0 | 26  | 7.5 | 165 |
| 1 | 1 | 1 | 1 | 1 | 0 | 27  | 7.5 | 165 |
| 1 | 1 | 1 | 1 | 1 | 0 | 28  | 7.5 | 165 |
| 1 | 1 | 1 | 1 | 1 | 0 | 29  | 7.5 | 165 |
| 1 | 1 | 1 | 1 | 1 | 0 | 30  | 7.5 | 165 |
| 1 | 1 | 1 | 1 | 1 | 0 | 31  | 7.5 | 165 |
| 1 | 1 | 1 | 1 | 1 | 0 | 32  | 7.5 | 165 |
| 1 | 1 | 1 | 1 | 1 | 0 | 33  | 7.5 | 165 |
| 1 | 1 | 1 | 1 | 1 | 0 | 34  | 7.5 | 165 |
| 1 | 1 | 1 | 1 | 1 | 0 | 35  | 7.5 | 165 |
| 1 | 1 | 1 | 1 | 1 | 0 | 36  | 7.5 | 165 |
| 1 | 1 | 1 | 1 | 1 | 0 | 37  | 7.5 | 165 |
| 1 | 1 | 1 | 1 | 1 | 0 | 38  | 7.5 | 165 |
| 1 | 1 | 1 | 1 | 1 | 0 | 39  | 7.5 | 165 |
| 1 | 1 | 1 | 1 | 1 | 0 | 40  | 7.5 | 165 |

|   |   |   |   |   |   |    |     |     |
|---|---|---|---|---|---|----|-----|-----|
| 1 | 1 | 1 | 1 | 1 | 0 | 41 | 7.5 | 165 |
| 1 | 1 | 1 | 1 | 1 | 0 | 42 | 7.5 | 165 |
| 1 | 1 | 1 | 1 | 1 | 0 | 43 | 7.5 | 165 |
| 1 | 1 | 1 | 1 | 1 | 0 | 44 | 7.5 | 165 |
| 1 | 1 | 1 | 1 | 1 | 0 | 45 | 7.5 | 165 |
| 1 | 1 | 1 | 1 | 1 | 0 | 46 | 7.5 | 165 |
| 1 | 1 | 1 | 1 | 1 | 0 | 47 | 7.5 | 165 |
| 1 | 1 | 1 | 1 | 1 | 0 | 48 | 7.5 | 165 |
| 1 | 1 | 1 | 1 | 1 | 0 | 49 | 7.5 | 165 |
| 1 | 1 | 1 | 1 | 1 | 0 | 50 | 7.5 | 165 |
| 1 | 1 | 1 | 1 | 1 | 0 | 51 | 7.5 | 165 |
| 1 | 1 | 1 | 1 | 1 | 0 | 52 | 7.5 | 165 |
| 1 | 1 | 1 | 1 | 1 | 0 | 53 | 7.5 | 165 |
| 1 | 1 | 1 | 1 | 1 | 0 | 54 | 7.5 | 165 |
| 1 | 1 | 1 | 1 | 1 | 0 | 55 | 7.5 | 165 |
| 1 | 1 | 1 | 1 | 1 | 0 | 56 | 7.5 | 165 |
| 1 | 1 | 1 | 1 | 1 | 0 | 57 | 7.5 | 165 |
| 1 | 1 | 1 | 1 | 1 | 0 | 58 | 7.5 | 165 |
| 1 | 1 | 1 | 1 | 1 | 0 | 59 | 7.5 | 165 |
| 1 | 1 | 1 | 1 | 1 | 0 | 60 | 7.5 | 165 |
| 1 | 1 | 1 | 1 | 1 | 0 | 61 | 7.5 | 165 |
| 1 | 1 | 1 | 1 | 1 | 0 | 62 | 7.5 | 165 |
| 1 | 1 | 1 | 1 | 1 | 0 | 63 | 7.5 | 165 |
| 1 | 1 | 1 | 1 | 1 | 0 | 64 | 7.5 | 165 |
| 1 | 1 | 1 | 1 | 1 | 0 | 65 | 7.5 | 165 |
| 1 | 1 | 1 | 1 | 1 | 0 | 66 | 7.5 | 165 |
| 1 | 1 | 1 | 1 | 1 | 0 | 67 | 7.5 | 165 |
| 1 | 1 | 1 | 1 | 1 | 0 | 68 | 7.5 | 165 |
| 1 | 1 | 1 | 1 | 1 | 0 | 69 | 7.5 | 165 |
| 1 | 1 | 1 | 1 | 1 | 0 | 70 | 7.5 | 165 |
| 1 | 1 | 1 | 1 | 1 | 0 | 71 | 7.5 | 165 |
| 1 | 1 | 1 | 1 | 1 | 0 | 72 | 7.5 | 165 |
| 1 | 1 | 1 | 1 | 1 | 0 | 73 | 7.5 | 165 |
| 1 | 1 | 1 | 1 | 1 | 0 | 74 | 7.5 | 165 |
| 1 | 1 | 1 | 1 | 1 | 0 | 75 | 7.5 | 165 |
| 1 | 1 | 1 | 1 | 1 | 0 | 76 | 7.5 | 165 |
| 1 | 1 | 1 | 1 | 1 | 0 | 77 | 7.5 | 165 |
| 1 | 1 | 1 | 1 | 1 | 0 | 78 | 7.5 | 165 |
| 1 | 1 | 1 | 1 | 1 | 0 | 79 | 7.5 | 165 |
| 1 | 1 | 1 | 1 | 1 | 0 | 80 | 7.5 | 165 |
| 1 | 1 | 1 | 1 | 1 | 0 | 81 | 7.5 | 165 |
| 1 | 1 | 1 | 1 | 1 | 0 | 82 | 7.5 | 165 |
| 1 | 1 | 1 | 1 | 1 | 0 | 83 | 7.5 | 165 |
| 1 | 1 | 1 | 1 | 1 | 0 | 84 | 7.5 | 165 |
| 1 | 1 | 1 | 1 | 1 | 0 | 85 | 7.5 | 165 |
| 1 | 1 | 1 | 1 | 1 | 0 | 86 | 7.5 | 165 |

|   |   |   |   |   |   |     |     |     |
|---|---|---|---|---|---|-----|-----|-----|
| 1 | 1 | 1 | 1 | 1 | 0 | 87  | 7.5 | 165 |
| 1 | 1 | 1 | 1 | 1 | 0 | 88  | 7.5 | 165 |
| 1 | 1 | 1 | 1 | 1 | 0 | 89  | 7.5 | 165 |
| 1 | 1 | 1 | 1 | 1 | 0 | 90  | 7.5 | 165 |
| 1 | 1 | 1 | 1 | 1 | 0 | 91  | 7.5 | 165 |
| 1 | 1 | 1 | 1 | 1 | 0 | 92  | 7.5 | 165 |
| 1 | 1 | 1 | 1 | 1 | 0 | 93  | 7.5 | 165 |
| 1 | 1 | 1 | 1 | 1 | 0 | 94  | 7.5 | 165 |
| 1 | 1 | 1 | 1 | 1 | 0 | 95  | 7.5 | 165 |
| 1 | 1 | 1 | 1 | 1 | 0 | 96  | 7.5 | 165 |
| 1 | 1 | 1 | 1 | 1 | 0 | 97  | 7.5 | 165 |
| 1 | 1 | 1 | 1 | 1 | 0 | 98  | 7.5 | 165 |
| 1 | 1 | 1 | 1 | 1 | 0 | 99  | 7.5 | 165 |
| 1 | 1 | 1 | 1 | 1 | 0 | 100 | 7.5 | 165 |
| 1 | 1 | 1 | 1 | 1 | 0 | 101 | 7.5 | 165 |
| 1 | 1 | 1 | 1 | 1 | 0 | 102 | 7.5 | 165 |
| 1 | 1 | 1 | 1 | 1 | 0 | 103 | 7.5 | 165 |
| 1 | 1 | 1 | 1 | 1 | 0 | 104 | 7.5 | 165 |
| 1 | 1 | 1 | 1 | 1 | 0 | 105 | 7.5 | 165 |
| 1 | 1 | 1 | 1 | 1 | 0 | 106 | 7.5 | 165 |
| 1 | 1 | 1 | 1 | 1 | 0 | 107 | 7.5 | 165 |
| 1 | 1 | 1 | 1 | 1 | 0 | 108 | 7.5 | 165 |
| 1 | 1 | 1 | 1 | 1 | 0 | 109 | 7.5 | 165 |
| 1 | 1 | 1 | 1 | 1 | 0 | 110 | 7.5 | 165 |
| 1 | 1 | 1 | 1 | 1 | 0 | 111 | 7.5 | 165 |
| 1 | 1 | 1 | 1 | 1 | 0 | 112 | 7.5 | 165 |
| 1 | 1 | 1 | 1 | 1 | 0 | 113 | 7.5 | 165 |
| 1 | 1 | 1 | 1 | 1 | 0 | 114 | 7.5 | 165 |
| 1 | 1 | 1 | 1 | 1 | 0 | 115 | 7.5 | 165 |
| 1 | 1 | 1 | 1 | 1 | 0 | 116 | 7.5 | 165 |
| 1 | 1 | 1 | 1 | 1 | 0 | 117 | 7.5 | 165 |
| 1 | 1 | 1 | 1 | 1 | 0 | 118 | 7.5 | 165 |
| 1 | 1 | 1 | 1 | 1 | 0 | 119 | 7.5 | 165 |
| 1 | 1 | 1 | 1 | 1 | 0 | 120 | 7.5 | 165 |
| 1 | 1 | 1 | 1 | 1 | 0 | 121 | 7.5 | 165 |
| 1 | 1 | 1 | 1 | 1 | 0 | 122 | 7.5 | 165 |
| 1 | 1 | 1 | 1 | 1 | 0 | 123 | 7.5 | 165 |
| 1 | 1 | 1 | 1 | 1 | 0 | 124 | 7.5 | 165 |
| 1 | 1 | 1 | 1 | 1 | 0 | 125 | 7.5 | 165 |
| 1 | 1 | 1 | 1 | 1 | 0 | 126 | 7.5 | 165 |
| 1 | 1 | 1 | 1 | 1 | 0 | 127 | 7.5 | 165 |
| 1 | 1 | 1 | 1 | 1 | 0 | 128 | 7.5 | 165 |
| 1 | 1 | 1 | 1 | 1 | 0 | 129 | 7.5 | 165 |
| 1 | 1 | 1 | 1 | 1 | 0 | 130 | 7.5 | 165 |
| 1 | 1 | 1 | 1 | 1 | 0 | 131 | 7.5 | 165 |
| 1 | 1 | 1 | 1 | 1 | 0 | 132 | 7.5 | 165 |

|   |   |   |   |   |   |     |     |     |
|---|---|---|---|---|---|-----|-----|-----|
| 1 | 1 | 1 | 1 | 1 | 0 | 133 | 7.5 | 165 |
| 1 | 1 | 1 | 1 | 1 | 0 | 134 | 7.5 | 165 |
| 1 | 1 | 1 | 1 | 1 | 0 | 135 | 7.5 | 165 |
| 1 | 1 | 1 | 1 | 1 | 0 | 136 | 7.5 | 165 |
| 1 | 1 | 1 | 1 | 1 | 0 | 137 | 7.5 | 165 |
| 1 | 1 | 1 | 1 | 1 | 0 | 138 | 7.5 | 165 |
| 1 | 1 | 1 | 1 | 1 | 0 | 139 | 7.5 | 165 |
| 1 | 1 | 1 | 1 | 1 | 0 | 140 | 7.5 | 165 |
| 1 | 1 | 1 | 1 | 1 | 0 | 141 | 7.5 | 165 |
| 1 | 1 | 1 | 1 | 1 | 0 | 142 | 7.5 | 165 |
| 1 | 1 | 1 | 1 | 1 | 0 | 143 | 7.5 | 165 |
| 1 | 1 | 1 | 1 | 1 | 0 | 144 | 7.5 | 165 |
| 1 | 1 | 1 | 1 | 1 | 0 | 145 | 7.5 | 165 |
| 1 | 1 | 1 | 1 | 1 | 0 | 146 | 7.5 | 165 |
| 1 | 1 | 1 | 1 | 1 | 0 | 147 | 7.5 | 165 |
| 1 | 1 | 1 | 1 | 1 | 0 | 148 | 7.5 | 165 |
| 1 | 1 | 1 | 1 | 1 | 0 | 149 | 7.5 | 165 |
| 1 | 1 | 1 | 1 | 1 | 0 | 150 | 7.5 | 165 |
| 1 | 1 | 1 | 1 | 1 | 0 | 151 | 7.5 | 165 |
| 1 | 1 | 1 | 1 | 1 | 0 | 152 | 7.5 | 165 |
| 1 | 1 | 1 | 1 | 1 | 0 | 153 | 7.5 | 165 |
| 1 | 1 | 1 | 1 | 1 | 0 | 154 | 7.5 | 165 |
| 1 | 1 | 1 | 1 | 1 | 0 | 155 | 7.5 | 165 |
| 1 | 1 | 1 | 1 | 1 | 0 | 156 | 7.5 | 165 |
| 1 | 1 | 1 | 1 | 1 | 0 | 157 | 7.5 | 165 |
| 1 | 1 | 1 | 1 | 1 | 0 | 158 | 7.5 | 165 |
| 1 | 1 | 1 | 1 | 1 | 0 | 159 | 7.5 | 165 |
| 1 | 1 | 1 | 1 | 1 | 0 | 160 | 7.5 | 165 |
| 1 | 1 | 1 | 1 | 1 | 0 | 161 | 7.5 | 165 |
| 1 | 1 | 1 | 1 | 1 | 0 | 162 | 7.5 | 165 |
| 1 | 1 | 1 | 1 | 1 | 0 | 163 | 7.5 | 165 |
| 1 | 1 | 1 | 1 | 1 | 0 | 164 | 7.5 | 165 |
| 1 | 1 | 1 | 1 | 1 | 0 | 165 | 7.5 | 165 |
| 1 | 1 | 1 | 1 | 1 | 0 | 166 | 7.5 | 165 |
| 1 | 1 | 1 | 1 | 1 | 0 | 167 | 7.5 | 165 |
| 1 | 1 | 1 | 1 | 1 | 0 | 168 | 7.5 | 165 |
| 1 | 1 | 1 | 1 | 1 | 0 | 169 | 7.5 | 165 |
| 1 | 1 | 1 | 1 | 1 | 0 | 170 | 7.5 | 165 |
| 1 | 1 | 1 | 1 | 1 | 0 | 171 | 7.5 | 165 |
| 1 | 1 | 1 | 1 | 1 | 0 | 172 | 7.5 | 165 |
| 1 | 1 | 1 | 1 | 1 | 0 | 173 | 7.5 | 165 |
| 1 | 1 | 1 | 1 | 1 | 0 | 174 | 7.5 | 165 |
| 1 | 1 | 1 | 1 | 1 | 0 | 175 | 7.5 | 165 |
| 1 | 1 | 1 | 1 | 1 | 0 | 176 | 7.5 | 165 |
| 1 | 1 | 1 | 1 | 1 | 0 | 177 | 7.5 | 165 |
| 1 | 1 | 1 | 1 | 1 | 0 | 178 | 7.5 | 165 |

|   |   |   |   |   |   |     |     |     |
|---|---|---|---|---|---|-----|-----|-----|
| 1 | 1 | 1 | 1 | 1 | 0 | 179 | 7.5 | 165 |
| 1 | 1 | 1 | 1 | 1 | 0 | 180 | 7.5 | 165 |
| 1 | 1 | 1 | 1 | 0 | 1 | 0   | 7.5 | 135 |
| 1 | 1 | 1 | 1 | 0 | 1 | 1   | 7.5 | 135 |
| 1 | 1 | 1 | 1 | 0 | 1 | 2   | 7.5 | 135 |
| 1 | 1 | 1 | 1 | 0 | 1 | 3   | 7.5 | 135 |
| 1 | 1 | 1 | 1 | 0 | 1 | 4   | 7.5 | 135 |
| 1 | 1 | 1 | 1 | 0 | 1 | 5   | 7.5 | 135 |
| 1 | 1 | 1 | 1 | 0 | 1 | 6   | 7.5 | 135 |
| 1 | 1 | 1 | 1 | 0 | 1 | 7   | 7.5 | 135 |
| 1 | 1 | 1 | 1 | 0 | 1 | 8   | 7.5 | 135 |
| 1 | 1 | 1 | 1 | 0 | 1 | 9   | 7.5 | 135 |
| 1 | 1 | 1 | 1 | 0 | 1 | 10  | 7.5 | 135 |
| 1 | 1 | 1 | 1 | 0 | 1 | 11  | 7.5 | 135 |
| 1 | 1 | 1 | 1 | 0 | 1 | 12  | 7.5 | 135 |
| 1 | 1 | 1 | 1 | 0 | 1 | 13  | 7.5 | 135 |
| 1 | 1 | 1 | 1 | 0 | 1 | 14  | 7.5 | 135 |
| 1 | 1 | 1 | 1 | 0 | 1 | 15  | 7.5 | 135 |
| 1 | 1 | 1 | 1 | 0 | 1 | 16  | 7.5 | 135 |
| 1 | 1 | 1 | 1 | 0 | 1 | 17  | 7.5 | 135 |
| 1 | 1 | 1 | 1 | 0 | 1 | 18  | 7.5 | 135 |
| 1 | 1 | 1 | 1 | 0 | 1 | 19  | 7.5 | 135 |
| 1 | 1 | 1 | 1 | 0 | 1 | 20  | 7.5 | 135 |
| 1 | 1 | 1 | 1 | 0 | 1 | 21  | 7.5 | 135 |
| 1 | 1 | 1 | 1 | 0 | 1 | 22  | 7.5 | 135 |
| 1 | 1 | 1 | 1 | 0 | 1 | 23  | 7.5 | 135 |
| 1 | 1 | 1 | 1 | 0 | 1 | 24  | 7.5 | 135 |
| 1 | 1 | 1 | 1 | 0 | 1 | 25  | 7.5 | 135 |
| 1 | 1 | 1 | 1 | 0 | 1 | 26  | 7.5 | 135 |
| 1 | 1 | 1 | 1 | 0 | 1 | 27  | 7.5 | 135 |
| 1 | 1 | 1 | 1 | 0 | 1 | 28  | 7.5 | 135 |
| 1 | 1 | 1 | 1 | 0 | 1 | 29  | 7.5 | 135 |
| 1 | 1 | 1 | 1 | 0 | 1 | 30  | 7.5 | 135 |
| 1 | 1 | 1 | 1 | 0 | 1 | 31  | 7.5 | 135 |
| 1 | 1 | 1 | 1 | 0 | 1 | 32  | 7.5 | 135 |
| 1 | 1 | 1 | 1 | 0 | 1 | 33  | 7.5 | 135 |
| 1 | 1 | 1 | 1 | 0 | 1 | 34  | 7.5 | 135 |
| 1 | 1 | 1 | 1 | 0 | 1 | 35  | 7.5 | 135 |
| 1 | 1 | 1 | 1 | 0 | 1 | 36  | 7.5 | 135 |
| 1 | 1 | 1 | 1 | 0 | 1 | 37  | 7.5 | 135 |
| 1 | 1 | 1 | 1 | 0 | 1 | 38  | 7.5 | 135 |
| 1 | 1 | 1 | 1 | 0 | 1 | 39  | 7.5 | 135 |
| 1 | 1 | 1 | 1 | 0 | 1 | 40  | 7.5 | 135 |
| 1 | 1 | 1 | 1 | 0 | 1 | 41  | 7.5 | 135 |
| 1 | 1 | 1 | 1 | 0 | 1 | 42  | 7.5 | 135 |
| 1 | 1 | 1 | 1 | 0 | 1 | 43  | 7.5 | 135 |

|   |   |   |   |   |   |    |     |     |
|---|---|---|---|---|---|----|-----|-----|
| 1 | 1 | 1 | 1 | 0 | 1 | 44 | 7.5 | 135 |
| 1 | 1 | 1 | 1 | 0 | 1 | 45 | 7.5 | 135 |
| 1 | 1 | 1 | 1 | 0 | 1 | 46 | 7.5 | 135 |
| 1 | 1 | 1 | 1 | 0 | 1 | 47 | 7.5 | 135 |
| 1 | 1 | 1 | 1 | 0 | 1 | 48 | 7.5 | 135 |
| 1 | 1 | 1 | 1 | 0 | 1 | 49 | 7.5 | 135 |
| 1 | 1 | 1 | 1 | 0 | 1 | 50 | 7.5 | 135 |
| 1 | 1 | 1 | 1 | 0 | 1 | 51 | 7.5 | 135 |
| 1 | 1 | 1 | 1 | 0 | 1 | 52 | 7.5 | 135 |
| 1 | 1 | 1 | 1 | 0 | 1 | 53 | 7.5 | 135 |
| 1 | 1 | 1 | 1 | 0 | 1 | 54 | 7.5 | 135 |
| 1 | 1 | 1 | 1 | 0 | 1 | 55 | 7.5 | 135 |
| 1 | 1 | 1 | 1 | 0 | 1 | 56 | 7.5 | 135 |
| 1 | 1 | 1 | 1 | 0 | 1 | 57 | 7.5 | 135 |
| 1 | 1 | 1 | 1 | 0 | 1 | 58 | 7.5 | 135 |
| 1 | 1 | 1 | 1 | 0 | 1 | 59 | 7.5 | 135 |
| 1 | 1 | 1 | 1 | 0 | 1 | 60 | 7.5 | 135 |
| 1 | 1 | 1 | 1 | 0 | 1 | 61 | 7.5 | 135 |
| 1 | 1 | 1 | 1 | 0 | 1 | 62 | 7.5 | 135 |
| 1 | 1 | 1 | 1 | 0 | 1 | 63 | 7.5 | 135 |
| 1 | 1 | 1 | 1 | 0 | 1 | 64 | 7.5 | 135 |
| 1 | 1 | 1 | 1 | 0 | 1 | 65 | 7.5 | 135 |
| 1 | 1 | 1 | 1 | 0 | 1 | 66 | 7.5 | 135 |
| 1 | 1 | 1 | 1 | 0 | 1 | 67 | 7.5 | 135 |
| 1 | 1 | 1 | 1 | 0 | 1 | 68 | 7.5 | 135 |
| 1 | 1 | 1 | 1 | 0 | 1 | 69 | 7.5 | 135 |
| 1 | 1 | 1 | 1 | 0 | 1 | 70 | 7.5 | 135 |
| 1 | 1 | 1 | 1 | 0 | 1 | 71 | 7.5 | 135 |
| 1 | 1 | 1 | 1 | 0 | 1 | 72 | 7.5 | 135 |
| 1 | 1 | 1 | 1 | 0 | 1 | 73 | 7.5 | 135 |
| 1 | 1 | 1 | 1 | 0 | 1 | 74 | 7.5 | 135 |
| 1 | 1 | 1 | 1 | 0 | 1 | 75 | 7.5 | 135 |
| 1 | 1 | 1 | 1 | 0 | 1 | 76 | 7.5 | 135 |
| 1 | 1 | 1 | 1 | 0 | 1 | 77 | 7.5 | 135 |
| 1 | 1 | 1 | 1 | 0 | 1 | 78 | 7.5 | 135 |
| 1 | 1 | 1 | 1 | 0 | 1 | 79 | 7.5 | 135 |
| 1 | 1 | 1 | 1 | 0 | 1 | 80 | 7.5 | 135 |
| 1 | 1 | 1 | 1 | 0 | 1 | 81 | 7.5 | 135 |
| 1 | 1 | 1 | 1 | 0 | 1 | 82 | 7.5 | 135 |
| 1 | 1 | 1 | 1 | 0 | 1 | 83 | 7.5 | 135 |
| 1 | 1 | 1 | 1 | 0 | 1 | 84 | 7.5 | 135 |
| 1 | 1 | 1 | 1 | 0 | 1 | 85 | 7.5 | 135 |
| 1 | 1 | 1 | 1 | 0 | 1 | 86 | 7.5 | 135 |
| 1 | 1 | 1 | 1 | 0 | 1 | 87 | 7.5 | 135 |
| 1 | 1 | 1 | 1 | 0 | 1 | 88 | 7.5 | 135 |
| 1 | 1 | 1 | 1 | 0 | 1 | 89 | 7.5 | 135 |

|   |   |   |   |   |   |     |     |     |
|---|---|---|---|---|---|-----|-----|-----|
| 1 | 1 | 1 | 1 | 0 | 1 | 90  | 7.5 | 135 |
| 1 | 1 | 1 | 1 | 0 | 1 | 91  | 7.5 | 135 |
| 1 | 1 | 1 | 1 | 0 | 1 | 92  | 7.5 | 135 |
| 1 | 1 | 1 | 1 | 0 | 1 | 93  | 7.5 | 135 |
| 1 | 1 | 1 | 1 | 0 | 1 | 94  | 7.5 | 135 |
| 1 | 1 | 1 | 1 | 0 | 1 | 95  | 7.5 | 135 |
| 1 | 1 | 1 | 1 | 0 | 1 | 96  | 7.5 | 135 |
| 1 | 1 | 1 | 1 | 0 | 1 | 97  | 7.5 | 135 |
| 1 | 1 | 1 | 1 | 0 | 1 | 98  | 7.5 | 135 |
| 1 | 1 | 1 | 1 | 0 | 1 | 99  | 7.5 | 135 |
| 1 | 1 | 1 | 1 | 0 | 1 | 100 | 7.5 | 135 |
| 1 | 1 | 1 | 1 | 0 | 1 | 101 | 7.5 | 135 |
| 1 | 1 | 1 | 1 | 0 | 1 | 102 | 7.5 | 135 |
| 1 | 1 | 1 | 1 | 0 | 1 | 103 | 7.5 | 135 |
| 1 | 1 | 1 | 1 | 0 | 1 | 104 | 7.5 | 135 |
| 1 | 1 | 1 | 1 | 0 | 1 | 105 | 7.5 | 135 |
| 1 | 1 | 1 | 1 | 0 | 1 | 106 | 7.5 | 135 |
| 1 | 1 | 1 | 1 | 0 | 1 | 107 | 7.5 | 135 |
| 1 | 1 | 1 | 1 | 0 | 1 | 108 | 7.5 | 135 |
| 1 | 1 | 1 | 1 | 0 | 1 | 109 | 7.5 | 135 |
| 1 | 1 | 1 | 1 | 0 | 1 | 110 | 7.5 | 135 |
| 1 | 1 | 1 | 1 | 0 | 1 | 111 | 7.5 | 135 |
| 1 | 1 | 1 | 1 | 0 | 1 | 112 | 7.5 | 135 |
| 1 | 1 | 1 | 1 | 0 | 1 | 113 | 7.5 | 135 |
| 1 | 1 | 1 | 1 | 0 | 1 | 114 | 7.5 | 135 |
| 1 | 1 | 1 | 1 | 0 | 1 | 115 | 7.5 | 135 |
| 1 | 1 | 1 | 1 | 0 | 1 | 116 | 7.5 | 135 |
| 1 | 1 | 1 | 1 | 0 | 1 | 117 | 7.5 | 135 |
| 1 | 1 | 1 | 1 | 0 | 1 | 118 | 7.5 | 135 |
| 1 | 1 | 1 | 1 | 0 | 1 | 119 | 7.5 | 135 |
| 1 | 1 | 1 | 1 | 0 | 1 | 120 | 7.5 | 135 |
| 1 | 1 | 1 | 1 | 0 | 1 | 121 | 7.5 | 135 |
| 1 | 1 | 1 | 1 | 0 | 1 | 122 | 7.5 | 135 |
| 1 | 1 | 1 | 1 | 0 | 1 | 123 | 7.5 | 135 |
| 1 | 1 | 1 | 1 | 0 | 1 | 124 | 7.5 | 135 |
| 1 | 1 | 1 | 1 | 0 | 1 | 125 | 7.5 | 135 |
| 1 | 1 | 1 | 1 | 0 | 1 | 126 | 7.5 | 135 |
| 1 | 1 | 1 | 1 | 0 | 1 | 127 | 7.5 | 135 |
| 1 | 1 | 1 | 1 | 0 | 1 | 128 | 7.5 | 135 |
| 1 | 1 | 1 | 1 | 0 | 1 | 129 | 7.5 | 135 |
| 1 | 1 | 1 | 1 | 0 | 1 | 130 | 7.5 | 135 |
| 1 | 1 | 1 | 1 | 0 | 1 | 131 | 7.5 | 135 |
| 1 | 1 | 1 | 1 | 0 | 1 | 132 | 7.5 | 135 |
| 1 | 1 | 1 | 1 | 0 | 1 | 133 | 7.5 | 135 |
| 1 | 1 | 1 | 1 | 0 | 1 | 134 | 7.5 | 135 |
| 1 | 1 | 1 | 1 | 0 | 1 | 135 | 7.5 | 135 |

|   |   |   |   |   |   |     |     |     |
|---|---|---|---|---|---|-----|-----|-----|
| 1 | 1 | 1 | 1 | 0 | 1 | 136 | 7.5 | 135 |
| 1 | 1 | 1 | 1 | 0 | 1 | 137 | 7.5 | 135 |
| 1 | 1 | 1 | 1 | 0 | 1 | 138 | 7.5 | 135 |
| 1 | 1 | 1 | 1 | 0 | 1 | 139 | 7.5 | 135 |
| 1 | 1 | 1 | 1 | 0 | 1 | 140 | 7.5 | 135 |
| 1 | 1 | 1 | 1 | 0 | 1 | 141 | 7.5 | 135 |
| 1 | 1 | 1 | 1 | 0 | 1 | 142 | 7.5 | 135 |
| 1 | 1 | 1 | 1 | 0 | 1 | 143 | 7.5 | 135 |
| 1 | 1 | 1 | 1 | 0 | 1 | 144 | 7.5 | 135 |
| 1 | 1 | 1 | 1 | 0 | 1 | 145 | 7.5 | 135 |
| 1 | 1 | 1 | 1 | 0 | 1 | 146 | 7.5 | 135 |
| 1 | 1 | 1 | 1 | 0 | 1 | 147 | 7.5 | 135 |
| 1 | 1 | 1 | 1 | 0 | 1 | 148 | 7.5 | 135 |
| 1 | 1 | 1 | 1 | 0 | 1 | 149 | 7.5 | 135 |
| 1 | 1 | 1 | 1 | 0 | 1 | 150 | 7.5 | 135 |
| 1 | 1 | 1 | 1 | 0 | 1 | 151 | 7.5 | 135 |
| 1 | 1 | 1 | 1 | 0 | 1 | 152 | 7.5 | 135 |
| 1 | 1 | 1 | 1 | 0 | 1 | 153 | 7.5 | 135 |
| 1 | 1 | 1 | 1 | 0 | 1 | 154 | 7.5 | 135 |
| 1 | 1 | 1 | 1 | 0 | 1 | 155 | 7.5 | 135 |
| 1 | 1 | 1 | 1 | 0 | 1 | 156 | 7.5 | 135 |
| 1 | 1 | 1 | 1 | 0 | 1 | 157 | 7.5 | 135 |
| 1 | 1 | 1 | 1 | 0 | 1 | 158 | 7.5 | 135 |
| 1 | 1 | 1 | 1 | 0 | 1 | 159 | 7.5 | 135 |
| 1 | 1 | 1 | 1 | 0 | 1 | 160 | 7.5 | 135 |
| 1 | 1 | 1 | 1 | 0 | 1 | 161 | 7.5 | 135 |
| 1 | 1 | 1 | 1 | 0 | 1 | 162 | 7.5 | 135 |
| 1 | 1 | 1 | 1 | 0 | 1 | 163 | 7.5 | 135 |
| 1 | 1 | 1 | 1 | 0 | 1 | 164 | 7.5 | 135 |
| 1 | 1 | 1 | 1 | 0 | 1 | 165 | 7.5 | 135 |
| 1 | 1 | 1 | 1 | 0 | 1 | 166 | 7.5 | 135 |
| 1 | 1 | 1 | 1 | 0 | 1 | 167 | 7.5 | 135 |
| 1 | 1 | 1 | 1 | 0 | 1 | 168 | 7.5 | 135 |
| 1 | 1 | 1 | 1 | 0 | 1 | 169 | 7.5 | 135 |
| 1 | 1 | 1 | 1 | 0 | 1 | 170 | 7.5 | 135 |
| 1 | 1 | 1 | 1 | 0 | 1 | 171 | 7.5 | 135 |
| 1 | 1 | 1 | 1 | 0 | 1 | 172 | 7.5 | 135 |
| 1 | 1 | 1 | 1 | 0 | 1 | 173 | 7.5 | 135 |
| 1 | 1 | 1 | 1 | 0 | 1 | 174 | 7.5 | 135 |
| 1 | 1 | 1 | 1 | 0 | 1 | 175 | 7.5 | 135 |
| 1 | 1 | 1 | 1 | 0 | 1 | 176 | 7.5 | 135 |
| 1 | 1 | 1 | 1 | 0 | 1 | 177 | 7.5 | 135 |
| 1 | 1 | 1 | 1 | 0 | 1 | 178 | 7.5 | 135 |
| 1 | 1 | 1 | 1 | 0 | 1 | 179 | 7.5 | 135 |
| 1 | 1 | 1 | 1 | 0 | 1 | 180 | 7.5 | 135 |
| 1 | 1 | 1 | 0 | 1 | 1 | 0   | 7.5 | 105 |

|   |   |   |   |   |   |    |     |     |
|---|---|---|---|---|---|----|-----|-----|
| 1 | 1 | 1 | 0 | 1 | 1 | 1  | 7.5 | 105 |
| 1 | 1 | 1 | 0 | 1 | 1 | 2  | 7.5 | 105 |
| 1 | 1 | 1 | 0 | 1 | 1 | 3  | 7.5 | 105 |
| 1 | 1 | 1 | 0 | 1 | 1 | 4  | 7.5 | 105 |
| 1 | 1 | 1 | 0 | 1 | 1 | 5  | 7.5 | 105 |
| 1 | 1 | 1 | 0 | 1 | 1 | 6  | 7.5 | 105 |
| 1 | 1 | 1 | 0 | 1 | 1 | 7  | 7.5 | 105 |
| 1 | 1 | 1 | 0 | 1 | 1 | 8  | 7.5 | 105 |
| 1 | 1 | 1 | 0 | 1 | 1 | 9  | 7.5 | 105 |
| 1 | 1 | 1 | 0 | 1 | 1 | 10 | 7.5 | 105 |
| 1 | 1 | 1 | 0 | 1 | 1 | 11 | 7.5 | 105 |
| 1 | 1 | 1 | 0 | 1 | 1 | 12 | 7.5 | 105 |
| 1 | 1 | 1 | 0 | 1 | 1 | 13 | 7.5 | 105 |
| 1 | 1 | 1 | 0 | 1 | 1 | 14 | 7.5 | 105 |
| 1 | 1 | 1 | 0 | 1 | 1 | 15 | 7.5 | 105 |
| 1 | 1 | 1 | 0 | 1 | 1 | 16 | 7.5 | 105 |
| 1 | 1 | 1 | 0 | 1 | 1 | 17 | 7.5 | 105 |
| 1 | 1 | 1 | 0 | 1 | 1 | 18 | 7.5 | 105 |
| 1 | 1 | 1 | 0 | 1 | 1 | 19 | 7.5 | 105 |
| 1 | 1 | 1 | 0 | 1 | 1 | 20 | 7.5 | 105 |
| 1 | 1 | 1 | 0 | 1 | 1 | 21 | 7.5 | 105 |
| 1 | 1 | 1 | 0 | 1 | 1 | 22 | 7.5 | 105 |
| 1 | 1 | 1 | 0 | 1 | 1 | 23 | 7.5 | 105 |
| 1 | 1 | 1 | 0 | 1 | 1 | 24 | 7.5 | 105 |
| 1 | 1 | 1 | 0 | 1 | 1 | 25 | 7.5 | 105 |
| 1 | 1 | 1 | 0 | 1 | 1 | 26 | 7.5 | 105 |
| 1 | 1 | 1 | 0 | 1 | 1 | 27 | 7.5 | 105 |
| 1 | 1 | 1 | 0 | 1 | 1 | 28 | 7.5 | 105 |
| 1 | 1 | 1 | 0 | 1 | 1 | 29 | 7.5 | 105 |
| 1 | 1 | 1 | 0 | 1 | 1 | 30 | 7.5 | 105 |
| 1 | 1 | 1 | 0 | 1 | 1 | 31 | 7.5 | 105 |
| 1 | 1 | 1 | 0 | 1 | 1 | 32 | 7.5 | 105 |
| 1 | 1 | 1 | 0 | 1 | 1 | 33 | 7.5 | 105 |
| 1 | 1 | 1 | 0 | 1 | 1 | 34 | 7.5 | 105 |
| 1 | 1 | 1 | 0 | 1 | 1 | 35 | 7.5 | 105 |
| 1 | 1 | 1 | 0 | 1 | 1 | 36 | 7.5 | 105 |
| 1 | 1 | 1 | 0 | 1 | 1 | 37 | 7.5 | 105 |
| 1 | 1 | 1 | 0 | 1 | 1 | 38 | 7.5 | 105 |
| 1 | 1 | 1 | 0 | 1 | 1 | 39 | 7.5 | 105 |
| 1 | 1 | 1 | 0 | 1 | 1 | 40 | 7.5 | 105 |
| 1 | 1 | 1 | 0 | 1 | 1 | 41 | 7.5 | 105 |
| 1 | 1 | 1 | 0 | 1 | 1 | 42 | 7.5 | 105 |
| 1 | 1 | 1 | 0 | 1 | 1 | 43 | 7.5 | 105 |
| 1 | 1 | 1 | 0 | 1 | 1 | 44 | 7.5 | 105 |
| 1 | 1 | 1 | 0 | 1 | 1 | 45 | 7.5 | 105 |
| 1 | 1 | 1 | 0 | 1 | 1 | 46 | 7.5 | 105 |

|   |   |   |   |   |   |    |     |     |
|---|---|---|---|---|---|----|-----|-----|
| 1 | 1 | 1 | 0 | 1 | 1 | 47 | 7.5 | 105 |
| 1 | 1 | 1 | 0 | 1 | 1 | 48 | 7.5 | 105 |
| 1 | 1 | 1 | 0 | 1 | 1 | 49 | 7.5 | 105 |
| 1 | 1 | 1 | 0 | 1 | 1 | 50 | 7.5 | 105 |
| 1 | 1 | 1 | 0 | 1 | 1 | 51 | 7.5 | 105 |
| 1 | 1 | 1 | 0 | 1 | 1 | 52 | 7.5 | 105 |
| 1 | 1 | 1 | 0 | 1 | 1 | 53 | 7.5 | 105 |
| 1 | 1 | 1 | 0 | 1 | 1 | 54 | 7.5 | 105 |
| 1 | 1 | 1 | 0 | 1 | 1 | 55 | 7.5 | 105 |
| 1 | 1 | 1 | 0 | 1 | 1 | 56 | 7.5 | 105 |
| 1 | 1 | 1 | 0 | 1 | 1 | 57 | 7.5 | 105 |
| 1 | 1 | 1 | 0 | 1 | 1 | 58 | 7.5 | 105 |
| 1 | 1 | 1 | 0 | 1 | 1 | 59 | 7.5 | 105 |
| 1 | 1 | 1 | 0 | 1 | 1 | 60 | 7.5 | 105 |
| 1 | 1 | 1 | 0 | 1 | 1 | 61 | 7.5 | 105 |
| 1 | 1 | 1 | 0 | 1 | 1 | 62 | 7.5 | 105 |
| 1 | 1 | 1 | 0 | 1 | 1 | 63 | 7.5 | 105 |
| 1 | 1 | 1 | 0 | 1 | 1 | 64 | 7.5 | 105 |
| 1 | 1 | 1 | 0 | 1 | 1 | 65 | 7.5 | 105 |
| 1 | 1 | 1 | 0 | 1 | 1 | 66 | 7.5 | 105 |
| 1 | 1 | 1 | 0 | 1 | 1 | 67 | 7.5 | 105 |
| 1 | 1 | 1 | 0 | 1 | 1 | 68 | 7.5 | 105 |
| 1 | 1 | 1 | 0 | 1 | 1 | 69 | 7.5 | 105 |
| 1 | 1 | 1 | 0 | 1 | 1 | 70 | 7.5 | 105 |
| 1 | 1 | 1 | 0 | 1 | 1 | 71 | 7.5 | 105 |
| 1 | 1 | 1 | 0 | 1 | 1 | 72 | 7.5 | 105 |
| 1 | 1 | 1 | 0 | 1 | 1 | 73 | 7.5 | 105 |
| 1 | 1 | 1 | 0 | 1 | 1 | 74 | 7.5 | 105 |
| 1 | 1 | 1 | 0 | 1 | 1 | 75 | 7.5 | 105 |
| 1 | 1 | 1 | 0 | 1 | 1 | 76 | 7.5 | 105 |
| 1 | 1 | 1 | 0 | 1 | 1 | 77 | 7.5 | 105 |
| 1 | 1 | 1 | 0 | 1 | 1 | 78 | 7.5 | 105 |
| 1 | 1 | 1 | 0 | 1 | 1 | 79 | 7.5 | 105 |
| 1 | 1 | 1 | 0 | 1 | 1 | 80 | 7.5 | 105 |
| 1 | 1 | 1 | 0 | 1 | 1 | 81 | 7.5 | 105 |
| 1 | 1 | 1 | 0 | 1 | 1 | 82 | 7.5 | 105 |
| 1 | 1 | 1 | 0 | 1 | 1 | 83 | 7.5 | 105 |
| 1 | 1 | 1 | 0 | 1 | 1 | 84 | 7.5 | 105 |
| 1 | 1 | 1 | 0 | 1 | 1 | 85 | 7.5 | 105 |
| 1 | 1 | 1 | 0 | 1 | 1 | 86 | 7.5 | 105 |
| 1 | 1 | 1 | 0 | 1 | 1 | 87 | 7.5 | 105 |
| 1 | 1 | 1 | 0 | 1 | 1 | 88 | 7.5 | 105 |
| 1 | 1 | 1 | 0 | 1 | 1 | 89 | 7.5 | 105 |
| 1 | 1 | 1 | 0 | 1 | 1 | 90 | 7.5 | 105 |
| 1 | 1 | 1 | 0 | 1 | 1 | 91 | 7.5 | 105 |
| 1 | 1 | 1 | 0 | 1 | 1 | 92 | 7.5 | 105 |

|   |   |   |   |   |   |     |     |     |
|---|---|---|---|---|---|-----|-----|-----|
| 1 | 1 | 1 | 0 | 1 | 1 | 93  | 7.5 | 105 |
| 1 | 1 | 1 | 0 | 1 | 1 | 94  | 7.5 | 105 |
| 1 | 1 | 1 | 0 | 1 | 1 | 95  | 7.5 | 105 |
| 1 | 1 | 1 | 0 | 1 | 1 | 96  | 7.5 | 105 |
| 1 | 1 | 1 | 0 | 1 | 1 | 97  | 7.5 | 105 |
| 1 | 1 | 1 | 0 | 1 | 1 | 98  | 7.5 | 105 |
| 1 | 1 | 1 | 0 | 1 | 1 | 99  | 7.5 | 105 |
| 1 | 1 | 1 | 0 | 1 | 1 | 100 | 7.5 | 105 |
| 1 | 1 | 1 | 0 | 1 | 1 | 101 | 7.5 | 105 |
| 1 | 1 | 1 | 0 | 1 | 1 | 102 | 7.5 | 105 |
| 1 | 1 | 1 | 0 | 1 | 1 | 103 | 7.5 | 105 |
| 1 | 1 | 1 | 0 | 1 | 1 | 104 | 7.5 | 105 |
| 1 | 1 | 1 | 0 | 1 | 1 | 105 | 7.5 | 105 |
| 1 | 1 | 1 | 0 | 1 | 1 | 106 | 7.5 | 105 |
| 1 | 1 | 1 | 0 | 1 | 1 | 107 | 7.5 | 105 |
| 1 | 1 | 1 | 0 | 1 | 1 | 108 | 7.5 | 105 |
| 1 | 1 | 1 | 0 | 1 | 1 | 109 | 7.5 | 105 |
| 1 | 1 | 1 | 0 | 1 | 1 | 110 | 7.5 | 105 |
| 1 | 1 | 1 | 0 | 1 | 1 | 111 | 7.5 | 105 |
| 1 | 1 | 1 | 0 | 1 | 1 | 112 | 7.5 | 105 |
| 1 | 1 | 1 | 0 | 1 | 1 | 113 | 7.5 | 105 |
| 1 | 1 | 1 | 0 | 1 | 1 | 114 | 7.5 | 105 |
| 1 | 1 | 1 | 0 | 1 | 1 | 115 | 7.5 | 105 |
| 1 | 1 | 1 | 0 | 1 | 1 | 116 | 7.5 | 105 |
| 1 | 1 | 1 | 0 | 1 | 1 | 117 | 7.5 | 105 |
| 1 | 1 | 1 | 0 | 1 | 1 | 118 | 7.5 | 105 |
| 1 | 1 | 1 | 0 | 1 | 1 | 119 | 7.5 | 105 |
| 1 | 1 | 1 | 0 | 1 | 1 | 120 | 7.5 | 105 |
| 1 | 1 | 1 | 0 | 1 | 1 | 121 | 7.5 | 105 |
| 1 | 1 | 1 | 0 | 1 | 1 | 122 | 7.5 | 105 |
| 1 | 1 | 1 | 0 | 1 | 1 | 123 | 7.5 | 105 |
| 1 | 1 | 1 | 0 | 1 | 1 | 124 | 7.5 | 105 |
| 1 | 1 | 1 | 0 | 1 | 1 | 125 | 7.5 | 105 |
| 1 | 1 | 1 | 0 | 1 | 1 | 126 | 7.5 | 105 |
| 1 | 1 | 1 | 0 | 1 | 1 | 127 | 7.5 | 105 |
| 1 | 1 | 1 | 0 | 1 | 1 | 128 | 7.5 | 105 |
| 1 | 1 | 1 | 0 | 1 | 1 | 129 | 7.5 | 105 |
| 1 | 1 | 1 | 0 | 1 | 1 | 130 | 7.5 | 105 |
| 1 | 1 | 1 | 0 | 1 | 1 | 131 | 7.5 | 105 |
| 1 | 1 | 1 | 0 | 1 | 1 | 132 | 7.5 | 105 |
| 1 | 1 | 1 | 0 | 1 | 1 | 133 | 7.5 | 105 |
| 1 | 1 | 1 | 0 | 1 | 1 | 134 | 7.5 | 105 |
| 1 | 1 | 1 | 0 | 1 | 1 | 135 | 7.5 | 105 |
| 1 | 1 | 1 | 0 | 1 | 1 | 136 | 7.5 | 105 |
| 1 | 1 | 1 | 0 | 1 | 1 | 137 | 7.5 | 105 |
| 1 | 1 | 1 | 0 | 1 | 1 | 138 | 7.5 | 105 |

|   |   |   |   |   |   |     |     |     |
|---|---|---|---|---|---|-----|-----|-----|
| 1 | 1 | 1 | 0 | 1 | 1 | 139 | 7.5 | 105 |
| 1 | 1 | 1 | 0 | 1 | 1 | 140 | 7.5 | 105 |
| 1 | 1 | 1 | 0 | 1 | 1 | 141 | 7.5 | 105 |
| 1 | 1 | 1 | 0 | 1 | 1 | 142 | 7.5 | 105 |
| 1 | 1 | 1 | 0 | 1 | 1 | 143 | 7.5 | 105 |
| 1 | 1 | 1 | 0 | 1 | 1 | 144 | 7.5 | 105 |
| 1 | 1 | 1 | 0 | 1 | 1 | 145 | 7.5 | 105 |
| 1 | 1 | 1 | 0 | 1 | 1 | 146 | 7.5 | 105 |
| 1 | 1 | 1 | 0 | 1 | 1 | 147 | 7.5 | 105 |
| 1 | 1 | 1 | 0 | 1 | 1 | 148 | 7.5 | 105 |
| 1 | 1 | 1 | 0 | 1 | 1 | 149 | 7.5 | 105 |
| 1 | 1 | 1 | 0 | 1 | 1 | 150 | 7.5 | 105 |
| 1 | 1 | 1 | 0 | 1 | 1 | 151 | 7.5 | 105 |
| 1 | 1 | 1 | 0 | 1 | 1 | 152 | 7.5 | 105 |
| 1 | 1 | 1 | 0 | 1 | 1 | 153 | 7.5 | 105 |
| 1 | 1 | 1 | 0 | 1 | 1 | 154 | 7.5 | 105 |
| 1 | 1 | 1 | 0 | 1 | 1 | 155 | 7.5 | 105 |
| 1 | 1 | 1 | 0 | 1 | 1 | 156 | 7.5 | 105 |
| 1 | 1 | 1 | 0 | 1 | 1 | 157 | 7.5 | 105 |
| 1 | 1 | 1 | 0 | 1 | 1 | 158 | 7.5 | 105 |
| 1 | 1 | 1 | 0 | 1 | 1 | 159 | 7.5 | 105 |
| 1 | 1 | 1 | 0 | 1 | 1 | 160 | 7.5 | 105 |
| 1 | 1 | 1 | 0 | 1 | 1 | 161 | 7.5 | 105 |
| 1 | 1 | 1 | 0 | 1 | 1 | 162 | 7.5 | 105 |
| 1 | 1 | 1 | 0 | 1 | 1 | 163 | 7.5 | 105 |
| 1 | 1 | 1 | 0 | 1 | 1 | 164 | 7.5 | 105 |
| 1 | 1 | 1 | 0 | 1 | 1 | 165 | 7.5 | 105 |
| 1 | 1 | 1 | 0 | 1 | 1 | 166 | 7.5 | 105 |
| 1 | 1 | 1 | 0 | 1 | 1 | 167 | 7.5 | 105 |
| 1 | 1 | 1 | 0 | 1 | 1 | 168 | 7.5 | 105 |
| 1 | 1 | 1 | 0 | 1 | 1 | 169 | 7.5 | 105 |
| 1 | 1 | 1 | 0 | 1 | 1 | 170 | 7.5 | 105 |
| 1 | 1 | 1 | 0 | 1 | 1 | 171 | 7.5 | 105 |
| 1 | 1 | 1 | 0 | 1 | 1 | 172 | 7.5 | 105 |
| 1 | 1 | 1 | 0 | 1 | 1 | 173 | 7.5 | 105 |
| 1 | 1 | 1 | 0 | 1 | 1 | 174 | 7.5 | 105 |
| 1 | 1 | 1 | 0 | 1 | 1 | 175 | 7.5 | 105 |
| 1 | 1 | 1 | 0 | 1 | 1 | 176 | 7.5 | 105 |
| 1 | 1 | 1 | 0 | 1 | 1 | 177 | 7.5 | 105 |
| 1 | 1 | 1 | 0 | 1 | 1 | 178 | 7.5 | 105 |
| 1 | 1 | 1 | 0 | 1 | 1 | 179 | 7.5 | 105 |
| 1 | 1 | 1 | 0 | 1 | 1 | 180 | 7.5 | 105 |
| 1 | 1 | 0 | 1 | 1 | 1 | 0   | 7.5 | 75  |
| 1 | 1 | 0 | 1 | 1 | 1 | 1   | 7.5 | 75  |
| 1 | 1 | 0 | 1 | 1 | 1 | 2   | 7.5 | 75  |
| 1 | 1 | 0 | 1 | 1 | 1 | 3   | 7.5 | 75  |

|   |   |   |   |   |   |    |     |    |
|---|---|---|---|---|---|----|-----|----|
| 1 | 1 | 0 | 1 | 1 | 1 | 4  | 7.5 | 75 |
| 1 | 1 | 0 | 1 | 1 | 1 | 5  | 7.5 | 75 |
| 1 | 1 | 0 | 1 | 1 | 1 | 6  | 7.5 | 75 |
| 1 | 1 | 0 | 1 | 1 | 1 | 7  | 7.5 | 75 |
| 1 | 1 | 0 | 1 | 1 | 1 | 8  | 7.5 | 75 |
| 1 | 1 | 0 | 1 | 1 | 1 | 9  | 7.5 | 75 |
| 1 | 1 | 0 | 1 | 1 | 1 | 10 | 7.5 | 75 |
| 1 | 1 | 0 | 1 | 1 | 1 | 11 | 7.5 | 75 |
| 1 | 1 | 0 | 1 | 1 | 1 | 12 | 7.5 | 75 |
| 1 | 1 | 0 | 1 | 1 | 1 | 13 | 7.5 | 75 |
| 1 | 1 | 0 | 1 | 1 | 1 | 14 | 7.5 | 75 |
| 1 | 1 | 0 | 1 | 1 | 1 | 15 | 7.5 | 75 |
| 1 | 1 | 0 | 1 | 1 | 1 | 16 | 7.5 | 75 |
| 1 | 1 | 0 | 1 | 1 | 1 | 17 | 7.5 | 75 |
| 1 | 1 | 0 | 1 | 1 | 1 | 18 | 7.5 | 75 |
| 1 | 1 | 0 | 1 | 1 | 1 | 19 | 7.5 | 75 |
| 1 | 1 | 0 | 1 | 1 | 1 | 20 | 7.5 | 75 |
| 1 | 1 | 0 | 1 | 1 | 1 | 21 | 7.5 | 75 |
| 1 | 1 | 0 | 1 | 1 | 1 | 22 | 7.5 | 75 |
| 1 | 1 | 0 | 1 | 1 | 1 | 23 | 7.5 | 75 |
| 1 | 1 | 0 | 1 | 1 | 1 | 24 | 7.5 | 75 |
| 1 | 1 | 0 | 1 | 1 | 1 | 25 | 7.5 | 75 |
| 1 | 1 | 0 | 1 | 1 | 1 | 26 | 7.5 | 75 |
| 1 | 1 | 0 | 1 | 1 | 1 | 27 | 7.5 | 75 |
| 1 | 1 | 0 | 1 | 1 | 1 | 28 | 7.5 | 75 |
| 1 | 1 | 0 | 1 | 1 | 1 | 29 | 7.5 | 75 |
| 1 | 1 | 0 | 1 | 1 | 1 | 30 | 7.5 | 75 |
| 1 | 1 | 0 | 1 | 1 | 1 | 31 | 7.5 | 75 |
| 1 | 1 | 0 | 1 | 1 | 1 | 32 | 7.5 | 75 |
| 1 | 1 | 0 | 1 | 1 | 1 | 33 | 7.5 | 75 |
| 1 | 1 | 0 | 1 | 1 | 1 | 34 | 7.5 | 75 |
| 1 | 1 | 0 | 1 | 1 | 1 | 35 | 7.5 | 75 |
| 1 | 1 | 0 | 1 | 1 | 1 | 36 | 7.5 | 75 |
| 1 | 1 | 0 | 1 | 1 | 1 | 37 | 7.5 | 75 |
| 1 | 1 | 0 | 1 | 1 | 1 | 38 | 7.5 | 75 |
| 1 | 1 | 0 | 1 | 1 | 1 | 39 | 7.5 | 75 |
| 1 | 1 | 0 | 1 | 1 | 1 | 40 | 7.5 | 75 |
| 1 | 1 | 0 | 1 | 1 | 1 | 41 | 7.5 | 75 |
| 1 | 1 | 0 | 1 | 1 | 1 | 42 | 7.5 | 75 |
| 1 | 1 | 0 | 1 | 1 | 1 | 43 | 7.5 | 75 |
| 1 | 1 | 0 | 1 | 1 | 1 | 44 | 7.5 | 75 |
| 1 | 1 | 0 | 1 | 1 | 1 | 45 | 7.5 | 75 |
| 1 | 1 | 0 | 1 | 1 | 1 | 46 | 7.5 | 75 |
| 1 | 1 | 0 | 1 | 1 | 1 | 47 | 7.5 | 75 |
| 1 | 1 | 0 | 1 | 1 | 1 | 48 | 7.5 | 75 |
| 1 | 1 | 0 | 1 | 1 | 1 | 49 | 7.5 | 75 |

|   |   |   |   |   |   |    |     |    |
|---|---|---|---|---|---|----|-----|----|
| 1 | 1 | 0 | 1 | 1 | 1 | 50 | 7.5 | 75 |
| 1 | 1 | 0 | 1 | 1 | 1 | 51 | 7.5 | 75 |
| 1 | 1 | 0 | 1 | 1 | 1 | 52 | 7.5 | 75 |
| 1 | 1 | 0 | 1 | 1 | 1 | 53 | 7.5 | 75 |
| 1 | 1 | 0 | 1 | 1 | 1 | 54 | 7.5 | 75 |
| 1 | 1 | 0 | 1 | 1 | 1 | 55 | 7.5 | 75 |
| 1 | 1 | 0 | 1 | 1 | 1 | 56 | 7.5 | 75 |
| 1 | 1 | 0 | 1 | 1 | 1 | 57 | 7.5 | 75 |
| 1 | 1 | 0 | 1 | 1 | 1 | 58 | 7.5 | 75 |
| 1 | 1 | 0 | 1 | 1 | 1 | 59 | 7.5 | 75 |
| 1 | 1 | 0 | 1 | 1 | 1 | 60 | 7.5 | 75 |
| 1 | 1 | 0 | 1 | 1 | 1 | 61 | 7.5 | 75 |
| 1 | 1 | 0 | 1 | 1 | 1 | 62 | 7.5 | 75 |
| 1 | 1 | 0 | 1 | 1 | 1 | 63 | 7.5 | 75 |
| 1 | 1 | 0 | 1 | 1 | 1 | 64 | 7.5 | 75 |
| 1 | 1 | 0 | 1 | 1 | 1 | 65 | 7.5 | 75 |
| 1 | 1 | 0 | 1 | 1 | 1 | 66 | 7.5 | 75 |
| 1 | 1 | 0 | 1 | 1 | 1 | 67 | 7.5 | 75 |
| 1 | 1 | 0 | 1 | 1 | 1 | 68 | 7.5 | 75 |
| 1 | 1 | 0 | 1 | 1 | 1 | 69 | 7.5 | 75 |
| 1 | 1 | 0 | 1 | 1 | 1 | 70 | 7.5 | 75 |
| 1 | 1 | 0 | 1 | 1 | 1 | 71 | 7.5 | 75 |
| 1 | 1 | 0 | 1 | 1 | 1 | 72 | 7.5 | 75 |
| 1 | 1 | 0 | 1 | 1 | 1 | 73 | 7.5 | 75 |
| 1 | 1 | 0 | 1 | 1 | 1 | 74 | 7.5 | 75 |
| 1 | 1 | 0 | 1 | 1 | 1 | 75 | 7.5 | 75 |
| 1 | 1 | 0 | 1 | 1 | 1 | 76 | 7.5 | 75 |
| 1 | 1 | 0 | 1 | 1 | 1 | 77 | 7.5 | 75 |
| 1 | 1 | 0 | 1 | 1 | 1 | 78 | 7.5 | 75 |
| 1 | 1 | 0 | 1 | 1 | 1 | 79 | 7.5 | 75 |
| 1 | 1 | 0 | 1 | 1 | 1 | 80 | 7.5 | 75 |
| 1 | 1 | 0 | 1 | 1 | 1 | 81 | 7.5 | 75 |
| 1 | 1 | 0 | 1 | 1 | 1 | 82 | 7.5 | 75 |
| 1 | 1 | 0 | 1 | 1 | 1 | 83 | 7.5 | 75 |
| 1 | 1 | 0 | 1 | 1 | 1 | 84 | 7.5 | 75 |
| 1 | 1 | 0 | 1 | 1 | 1 | 85 | 7.5 | 75 |
| 1 | 1 | 0 | 1 | 1 | 1 | 86 | 7.5 | 75 |
| 1 | 1 | 0 | 1 | 1 | 1 | 87 | 7.5 | 75 |
| 1 | 1 | 0 | 1 | 1 | 1 | 88 | 7.5 | 75 |
| 1 | 1 | 0 | 1 | 1 | 1 | 89 | 7.5 | 75 |
| 1 | 1 | 0 | 1 | 1 | 1 | 90 | 7.5 | 75 |
| 1 | 1 | 0 | 1 | 1 | 1 | 91 | 7.5 | 75 |
| 1 | 1 | 0 | 1 | 1 | 1 | 92 | 7.5 | 75 |
| 1 | 1 | 0 | 1 | 1 | 1 | 93 | 7.5 | 75 |
| 1 | 1 | 0 | 1 | 1 | 1 | 94 | 7.5 | 75 |
| 1 | 1 | 0 | 1 | 1 | 1 | 95 | 7.5 | 75 |

|   |   |   |   |   |   |     |     |    |
|---|---|---|---|---|---|-----|-----|----|
| 1 | 1 | 0 | 1 | 1 | 1 | 96  | 7.5 | 75 |
| 1 | 1 | 0 | 1 | 1 | 1 | 97  | 7.5 | 75 |
| 1 | 1 | 0 | 1 | 1 | 1 | 98  | 7.5 | 75 |
| 1 | 1 | 0 | 1 | 1 | 1 | 99  | 7.5 | 75 |
| 1 | 1 | 0 | 1 | 1 | 1 | 100 | 7.5 | 75 |
| 1 | 1 | 0 | 1 | 1 | 1 | 101 | 7.5 | 75 |
| 1 | 1 | 0 | 1 | 1 | 1 | 102 | 7.5 | 75 |
| 1 | 1 | 0 | 1 | 1 | 1 | 103 | 7.5 | 75 |
| 1 | 1 | 0 | 1 | 1 | 1 | 104 | 7.5 | 75 |
| 1 | 1 | 0 | 1 | 1 | 1 | 105 | 7.5 | 75 |
| 1 | 1 | 0 | 1 | 1 | 1 | 106 | 7.5 | 75 |
| 1 | 1 | 0 | 1 | 1 | 1 | 107 | 7.5 | 75 |
| 1 | 1 | 0 | 1 | 1 | 1 | 108 | 7.5 | 75 |
| 1 | 1 | 0 | 1 | 1 | 1 | 109 | 7.5 | 75 |
| 1 | 1 | 0 | 1 | 1 | 1 | 110 | 7.5 | 75 |
| 1 | 1 | 0 | 1 | 1 | 1 | 111 | 7.5 | 75 |
| 1 | 1 | 0 | 1 | 1 | 1 | 112 | 7.5 | 75 |
| 1 | 1 | 0 | 1 | 1 | 1 | 113 | 7.5 | 75 |
| 1 | 1 | 0 | 1 | 1 | 1 | 114 | 7.5 | 75 |
| 1 | 1 | 0 | 1 | 1 | 1 | 115 | 7.5 | 75 |
| 1 | 1 | 0 | 1 | 1 | 1 | 116 | 7.5 | 75 |
| 1 | 1 | 0 | 1 | 1 | 1 | 117 | 7.5 | 75 |
| 1 | 1 | 0 | 1 | 1 | 1 | 118 | 7.5 | 75 |
| 1 | 1 | 0 | 1 | 1 | 1 | 119 | 7.5 | 75 |
| 1 | 1 | 0 | 1 | 1 | 1 | 120 | 7.5 | 75 |
| 1 | 1 | 0 | 1 | 1 | 1 | 121 | 7.5 | 75 |
| 1 | 1 | 0 | 1 | 1 | 1 | 122 | 7.5 | 75 |
| 1 | 1 | 0 | 1 | 1 | 1 | 123 | 7.5 | 75 |
| 1 | 1 | 0 | 1 | 1 | 1 | 124 | 7.5 | 75 |
| 1 | 1 | 0 | 1 | 1 | 1 | 125 | 7.5 | 75 |
| 1 | 1 | 0 | 1 | 1 | 1 | 126 | 7.5 | 75 |
| 1 | 1 | 0 | 1 | 1 | 1 | 127 | 7.5 | 75 |
| 1 | 1 | 0 | 1 | 1 | 1 | 128 | 7.5 | 75 |
| 1 | 1 | 0 | 1 | 1 | 1 | 129 | 7.5 | 75 |
| 1 | 1 | 0 | 1 | 1 | 1 | 130 | 7.5 | 75 |
| 1 | 1 | 0 | 1 | 1 | 1 | 131 | 7.5 | 75 |
| 1 | 1 | 0 | 1 | 1 | 1 | 132 | 7.5 | 75 |
| 1 | 1 | 0 | 1 | 1 | 1 | 133 | 7.5 | 75 |
| 1 | 1 | 0 | 1 | 1 | 1 | 134 | 7.5 | 75 |
| 1 | 1 | 0 | 1 | 1 | 1 | 135 | 7.5 | 75 |
| 1 | 1 | 0 | 1 | 1 | 1 | 136 | 7.5 | 75 |
| 1 | 1 | 0 | 1 | 1 | 1 | 137 | 7.5 | 75 |
| 1 | 1 | 0 | 1 | 1 | 1 | 138 | 7.5 | 75 |
| 1 | 1 | 0 | 1 | 1 | 1 | 139 | 7.5 | 75 |
| 1 | 1 | 0 | 1 | 1 | 1 | 140 | 7.5 | 75 |
| 1 | 1 | 0 | 1 | 1 | 1 | 141 | 7.5 | 75 |

|   |   |   |   |   |   |     |     |    |
|---|---|---|---|---|---|-----|-----|----|
| 1 | 1 | 0 | 1 | 1 | 1 | 142 | 7.5 | 75 |
| 1 | 1 | 0 | 1 | 1 | 1 | 143 | 7.5 | 75 |
| 1 | 1 | 0 | 1 | 1 | 1 | 144 | 7.5 | 75 |
| 1 | 1 | 0 | 1 | 1 | 1 | 145 | 7.5 | 75 |
| 1 | 1 | 0 | 1 | 1 | 1 | 146 | 7.5 | 75 |
| 1 | 1 | 0 | 1 | 1 | 1 | 147 | 7.5 | 75 |
| 1 | 1 | 0 | 1 | 1 | 1 | 148 | 7.5 | 75 |
| 1 | 1 | 0 | 1 | 1 | 1 | 149 | 7.5 | 75 |
| 1 | 1 | 0 | 1 | 1 | 1 | 150 | 7.5 | 75 |
| 1 | 1 | 0 | 1 | 1 | 1 | 151 | 7.5 | 75 |
| 1 | 1 | 0 | 1 | 1 | 1 | 152 | 7.5 | 75 |
| 1 | 1 | 0 | 1 | 1 | 1 | 153 | 7.5 | 75 |
| 1 | 1 | 0 | 1 | 1 | 1 | 154 | 7.5 | 75 |
| 1 | 1 | 0 | 1 | 1 | 1 | 155 | 7.5 | 75 |
| 1 | 1 | 0 | 1 | 1 | 1 | 156 | 7.5 | 75 |
| 1 | 1 | 0 | 1 | 1 | 1 | 157 | 7.5 | 75 |
| 1 | 1 | 0 | 1 | 1 | 1 | 158 | 7.5 | 75 |
| 1 | 1 | 0 | 1 | 1 | 1 | 159 | 7.5 | 75 |
| 1 | 1 | 0 | 1 | 1 | 1 | 160 | 7.5 | 75 |
| 1 | 1 | 0 | 1 | 1 | 1 | 161 | 7.5 | 75 |
| 1 | 1 | 0 | 1 | 1 | 1 | 162 | 7.5 | 75 |
| 1 | 1 | 0 | 1 | 1 | 1 | 163 | 7.5 | 75 |
| 1 | 1 | 0 | 1 | 1 | 1 | 164 | 7.5 | 75 |
| 1 | 1 | 0 | 1 | 1 | 1 | 165 | 7.5 | 75 |
| 1 | 1 | 0 | 1 | 1 | 1 | 166 | 7.5 | 75 |
| 1 | 1 | 0 | 1 | 1 | 1 | 167 | 7.5 | 75 |
| 1 | 1 | 0 | 1 | 1 | 1 | 168 | 7.5 | 75 |
| 1 | 1 | 0 | 1 | 1 | 1 | 169 | 7.5 | 75 |
| 1 | 1 | 0 | 1 | 1 | 1 | 170 | 7.5 | 75 |
| 1 | 1 | 0 | 1 | 1 | 1 | 171 | 7.5 | 75 |
| 1 | 1 | 0 | 1 | 1 | 1 | 172 | 7.5 | 75 |
| 1 | 1 | 0 | 1 | 1 | 1 | 173 | 7.5 | 75 |
| 1 | 1 | 0 | 1 | 1 | 1 | 174 | 7.5 | 75 |
| 1 | 1 | 0 | 1 | 1 | 1 | 175 | 7.5 | 75 |
| 1 | 1 | 0 | 1 | 1 | 1 | 176 | 7.5 | 75 |
| 1 | 1 | 0 | 1 | 1 | 1 | 177 | 7.5 | 75 |
| 1 | 1 | 0 | 1 | 1 | 1 | 178 | 7.5 | 75 |
| 1 | 1 | 0 | 1 | 1 | 1 | 179 | 7.5 | 75 |
| 1 | 1 | 0 | 1 | 1 | 1 | 180 | 7.5 | 75 |
| 1 | 0 | 1 | 1 | 1 | 1 | 0   | 7.5 | 45 |
| 1 | 0 | 1 | 1 | 1 | 1 | 1   | 7.5 | 45 |
| 1 | 0 | 1 | 1 | 1 | 1 | 2   | 7.5 | 45 |
| 1 | 0 | 1 | 1 | 1 | 1 | 3   | 7.5 | 45 |
| 1 | 0 | 1 | 1 | 1 | 1 | 4   | 7.5 | 45 |
| 1 | 0 | 1 | 1 | 1 | 1 | 5   | 7.5 | 45 |
| 1 | 0 | 1 | 1 | 1 | 1 | 6   | 7.5 | 45 |

|   |   |   |   |   |   |    |     |    |
|---|---|---|---|---|---|----|-----|----|
| 1 | 0 | 1 | 1 | 1 | 1 | 7  | 7.5 | 45 |
| 1 | 0 | 1 | 1 | 1 | 1 | 8  | 7.5 | 45 |
| 1 | 0 | 1 | 1 | 1 | 1 | 9  | 7.5 | 45 |
| 1 | 0 | 1 | 1 | 1 | 1 | 10 | 7.5 | 45 |
| 1 | 0 | 1 | 1 | 1 | 1 | 11 | 7.5 | 45 |
| 1 | 0 | 1 | 1 | 1 | 1 | 12 | 7.5 | 45 |
| 1 | 0 | 1 | 1 | 1 | 1 | 13 | 7.5 | 45 |
| 1 | 0 | 1 | 1 | 1 | 1 | 14 | 7.5 | 45 |
| 1 | 0 | 1 | 1 | 1 | 1 | 15 | 7.5 | 45 |
| 1 | 0 | 1 | 1 | 1 | 1 | 16 | 7.5 | 45 |
| 1 | 0 | 1 | 1 | 1 | 1 | 17 | 7.5 | 45 |
| 1 | 0 | 1 | 1 | 1 | 1 | 18 | 7.5 | 45 |
| 1 | 0 | 1 | 1 | 1 | 1 | 19 | 7.5 | 45 |
| 1 | 0 | 1 | 1 | 1 | 1 | 20 | 7.5 | 45 |
| 1 | 0 | 1 | 1 | 1 | 1 | 21 | 7.5 | 45 |
| 1 | 0 | 1 | 1 | 1 | 1 | 22 | 7.5 | 45 |
| 1 | 0 | 1 | 1 | 1 | 1 | 23 | 7.5 | 45 |
| 1 | 0 | 1 | 1 | 1 | 1 | 24 | 7.5 | 45 |
| 1 | 0 | 1 | 1 | 1 | 1 | 25 | 7.5 | 45 |
| 1 | 0 | 1 | 1 | 1 | 1 | 26 | 7.5 | 45 |
| 1 | 0 | 1 | 1 | 1 | 1 | 27 | 7.5 | 45 |
| 1 | 0 | 1 | 1 | 1 | 1 | 28 | 7.5 | 45 |
| 1 | 0 | 1 | 1 | 1 | 1 | 29 | 7.5 | 45 |
| 1 | 0 | 1 | 1 | 1 | 1 | 30 | 7.5 | 45 |
| 1 | 0 | 1 | 1 | 1 | 1 | 31 | 7.5 | 45 |
| 1 | 0 | 1 | 1 | 1 | 1 | 32 | 7.5 | 45 |
| 1 | 0 | 1 | 1 | 1 | 1 | 33 | 7.5 | 45 |
| 1 | 0 | 1 | 1 | 1 | 1 | 34 | 7.5 | 45 |
| 1 | 0 | 1 | 1 | 1 | 1 | 35 | 7.5 | 45 |
| 1 | 0 | 1 | 1 | 1 | 1 | 36 | 7.5 | 45 |
| 1 | 0 | 1 | 1 | 1 | 1 | 37 | 7.5 | 45 |
| 1 | 0 | 1 | 1 | 1 | 1 | 38 | 7.5 | 45 |
| 1 | 0 | 1 | 1 | 1 | 1 | 39 | 7.5 | 45 |
| 1 | 0 | 1 | 1 | 1 | 1 | 40 | 7.5 | 45 |
| 1 | 0 | 1 | 1 | 1 | 1 | 41 | 7.5 | 45 |
| 1 | 0 | 1 | 1 | 1 | 1 | 42 | 7.5 | 45 |
| 1 | 0 | 1 | 1 | 1 | 1 | 43 | 7.5 | 45 |
| 1 | 0 | 1 | 1 | 1 | 1 | 44 | 7.5 | 45 |
| 1 | 0 | 1 | 1 | 1 | 1 | 45 | 7.5 | 45 |
| 1 | 0 | 1 | 1 | 1 | 1 | 46 | 7.5 | 45 |
| 1 | 0 | 1 | 1 | 1 | 1 | 47 | 7.5 | 45 |
| 1 | 0 | 1 | 1 | 1 | 1 | 48 | 7.5 | 45 |
| 1 | 0 | 1 | 1 | 1 | 1 | 49 | 7.5 | 45 |
| 1 | 0 | 1 | 1 | 1 | 1 | 50 | 7.5 | 45 |
| 1 | 0 | 1 | 1 | 1 | 1 | 51 | 7.5 | 45 |
| 1 | 0 | 1 | 1 | 1 | 1 | 52 | 7.5 | 45 |

|   |   |   |   |   |   |    |     |    |
|---|---|---|---|---|---|----|-----|----|
| 1 | 0 | 1 | 1 | 1 | 1 | 53 | 7.5 | 45 |
| 1 | 0 | 1 | 1 | 1 | 1 | 54 | 7.5 | 45 |
| 1 | 0 | 1 | 1 | 1 | 1 | 55 | 7.5 | 45 |
| 1 | 0 | 1 | 1 | 1 | 1 | 56 | 7.5 | 45 |
| 1 | 0 | 1 | 1 | 1 | 1 | 57 | 7.5 | 45 |
| 1 | 0 | 1 | 1 | 1 | 1 | 58 | 7.5 | 45 |
| 1 | 0 | 1 | 1 | 1 | 1 | 59 | 7.5 | 45 |
| 1 | 0 | 1 | 1 | 1 | 1 | 60 | 7.5 | 45 |
| 1 | 0 | 1 | 1 | 1 | 1 | 61 | 7.5 | 45 |
| 1 | 0 | 1 | 1 | 1 | 1 | 62 | 7.5 | 45 |
| 1 | 0 | 1 | 1 | 1 | 1 | 63 | 7.5 | 45 |
| 1 | 0 | 1 | 1 | 1 | 1 | 64 | 7.5 | 45 |
| 1 | 0 | 1 | 1 | 1 | 1 | 65 | 7.5 | 45 |
| 1 | 0 | 1 | 1 | 1 | 1 | 66 | 7.5 | 45 |
| 1 | 0 | 1 | 1 | 1 | 1 | 67 | 7.5 | 45 |
| 1 | 0 | 1 | 1 | 1 | 1 | 68 | 7.5 | 45 |
| 1 | 0 | 1 | 1 | 1 | 1 | 69 | 7.5 | 45 |
| 1 | 0 | 1 | 1 | 1 | 1 | 70 | 7.5 | 45 |
| 1 | 0 | 1 | 1 | 1 | 1 | 71 | 7.5 | 45 |
| 1 | 0 | 1 | 1 | 1 | 1 | 72 | 7.5 | 45 |
| 1 | 0 | 1 | 1 | 1 | 1 | 73 | 7.5 | 45 |
| 1 | 0 | 1 | 1 | 1 | 1 | 74 | 7.5 | 45 |
| 1 | 0 | 1 | 1 | 1 | 1 | 75 | 7.5 | 45 |
| 1 | 0 | 1 | 1 | 1 | 1 | 76 | 7.5 | 45 |
| 1 | 0 | 1 | 1 | 1 | 1 | 77 | 7.5 | 45 |
| 1 | 0 | 1 | 1 | 1 | 1 | 78 | 7.5 | 45 |
| 1 | 0 | 1 | 1 | 1 | 1 | 79 | 7.5 | 45 |
| 1 | 0 | 1 | 1 | 1 | 1 | 80 | 7.5 | 45 |
| 1 | 0 | 1 | 1 | 1 | 1 | 81 | 7.5 | 45 |
| 1 | 0 | 1 | 1 | 1 | 1 | 82 | 7.5 | 45 |
| 1 | 0 | 1 | 1 | 1 | 1 | 83 | 7.5 | 45 |
| 1 | 0 | 1 | 1 | 1 | 1 | 84 | 7.5 | 45 |
| 1 | 0 | 1 | 1 | 1 | 1 | 85 | 7.5 | 45 |
| 1 | 0 | 1 | 1 | 1 | 1 | 86 | 7.5 | 45 |
| 1 | 0 | 1 | 1 | 1 | 1 | 87 | 7.5 | 45 |
| 1 | 0 | 1 | 1 | 1 | 1 | 88 | 7.5 | 45 |
| 1 | 0 | 1 | 1 | 1 | 1 | 89 | 7.5 | 45 |
| 1 | 0 | 1 | 1 | 1 | 1 | 90 | 7.5 | 45 |
| 1 | 0 | 1 | 1 | 1 | 1 | 91 | 7.5 | 45 |
| 1 | 0 | 1 | 1 | 1 | 1 | 92 | 7.5 | 45 |
| 1 | 0 | 1 | 1 | 1 | 1 | 93 | 7.5 | 45 |
| 1 | 0 | 1 | 1 | 1 | 1 | 94 | 7.5 | 45 |
| 1 | 0 | 1 | 1 | 1 | 1 | 95 | 7.5 | 45 |
| 1 | 0 | 1 | 1 | 1 | 1 | 96 | 7.5 | 45 |
| 1 | 0 | 1 | 1 | 1 | 1 | 97 | 7.5 | 45 |
| 1 | 0 | 1 | 1 | 1 | 1 | 98 | 7.5 | 45 |

|   |   |   |   |   |   |     |     |    |
|---|---|---|---|---|---|-----|-----|----|
| 1 | 0 | 1 | 1 | 1 | 1 | 99  | 7.5 | 45 |
| 1 | 0 | 1 | 1 | 1 | 1 | 100 | 7.5 | 45 |
| 1 | 0 | 1 | 1 | 1 | 1 | 101 | 7.5 | 45 |
| 1 | 0 | 1 | 1 | 1 | 1 | 102 | 7.5 | 45 |
| 1 | 0 | 1 | 1 | 1 | 1 | 103 | 7.5 | 45 |
| 1 | 0 | 1 | 1 | 1 | 1 | 104 | 7.5 | 45 |
| 1 | 0 | 1 | 1 | 1 | 1 | 105 | 7.5 | 45 |
| 1 | 0 | 1 | 1 | 1 | 1 | 106 | 7.5 | 45 |
| 1 | 0 | 1 | 1 | 1 | 1 | 107 | 7.5 | 45 |
| 1 | 0 | 1 | 1 | 1 | 1 | 108 | 7.5 | 45 |
| 1 | 0 | 1 | 1 | 1 | 1 | 109 | 7.5 | 45 |
| 1 | 0 | 1 | 1 | 1 | 1 | 110 | 7.5 | 45 |
| 1 | 0 | 1 | 1 | 1 | 1 | 111 | 7.5 | 45 |
| 1 | 0 | 1 | 1 | 1 | 1 | 112 | 7.5 | 45 |
| 1 | 0 | 1 | 1 | 1 | 1 | 113 | 7.5 | 45 |
| 1 | 0 | 1 | 1 | 1 | 1 | 114 | 7.5 | 45 |
| 1 | 0 | 1 | 1 | 1 | 1 | 115 | 7.5 | 45 |
| 1 | 0 | 1 | 1 | 1 | 1 | 116 | 7.5 | 45 |
| 1 | 0 | 1 | 1 | 1 | 1 | 117 | 7.5 | 45 |
| 1 | 0 | 1 | 1 | 1 | 1 | 118 | 7.5 | 45 |
| 1 | 0 | 1 | 1 | 1 | 1 | 119 | 7.5 | 45 |
| 1 | 0 | 1 | 1 | 1 | 1 | 120 | 7.5 | 45 |
| 1 | 0 | 1 | 1 | 1 | 1 | 121 | 7.5 | 45 |
| 1 | 0 | 1 | 1 | 1 | 1 | 122 | 7.5 | 45 |
| 1 | 0 | 1 | 1 | 1 | 1 | 123 | 7.5 | 45 |
| 1 | 0 | 1 | 1 | 1 | 1 | 124 | 7.5 | 45 |
| 1 | 0 | 1 | 1 | 1 | 1 | 125 | 7.5 | 45 |
| 1 | 0 | 1 | 1 | 1 | 1 | 126 | 7.5 | 45 |
| 1 | 0 | 1 | 1 | 1 | 1 | 127 | 7.5 | 45 |
| 1 | 0 | 1 | 1 | 1 | 1 | 128 | 7.5 | 45 |
| 1 | 0 | 1 | 1 | 1 | 1 | 129 | 7.5 | 45 |
| 1 | 0 | 1 | 1 | 1 | 1 | 130 | 7.5 | 45 |
| 1 | 0 | 1 | 1 | 1 | 1 | 131 | 7.5 | 45 |
| 1 | 0 | 1 | 1 | 1 | 1 | 132 | 7.5 | 45 |
| 1 | 0 | 1 | 1 | 1 | 1 | 133 | 7.5 | 45 |
| 1 | 0 | 1 | 1 | 1 | 1 | 134 | 7.5 | 45 |
| 1 | 0 | 1 | 1 | 1 | 1 | 135 | 7.5 | 45 |
| 1 | 0 | 1 | 1 | 1 | 1 | 136 | 7.5 | 45 |
| 1 | 0 | 1 | 1 | 1 | 1 | 137 | 7.5 | 45 |
| 1 | 0 | 1 | 1 | 1 | 1 | 138 | 7.5 | 45 |
| 1 | 0 | 1 | 1 | 1 | 1 | 139 | 7.5 | 45 |
| 1 | 0 | 1 | 1 | 1 | 1 | 140 | 7.5 | 45 |
| 1 | 0 | 1 | 1 | 1 | 1 | 141 | 7.5 | 45 |
| 1 | 0 | 1 | 1 | 1 | 1 | 142 | 7.5 | 45 |
| 1 | 0 | 1 | 1 | 1 | 1 | 143 | 7.5 | 45 |
| 1 | 0 | 1 | 1 | 1 | 1 | 144 | 7.5 | 45 |

|   |   |   |   |   |   |     |     |     |
|---|---|---|---|---|---|-----|-----|-----|
| 1 | 0 | 1 | 1 | 1 | 1 | 145 | 7.5 | 45  |
| 1 | 0 | 1 | 1 | 1 | 1 | 146 | 7.5 | 45  |
| 1 | 0 | 1 | 1 | 1 | 1 | 147 | 7.5 | 45  |
| 1 | 0 | 1 | 1 | 1 | 1 | 148 | 7.5 | 45  |
| 1 | 0 | 1 | 1 | 1 | 1 | 149 | 7.5 | 45  |
| 1 | 0 | 1 | 1 | 1 | 1 | 150 | 7.5 | 45  |
| 1 | 0 | 1 | 1 | 1 | 1 | 151 | 7.5 | 45  |
| 1 | 0 | 1 | 1 | 1 | 1 | 152 | 7.5 | 45  |
| 1 | 0 | 1 | 1 | 1 | 1 | 153 | 7.5 | 45  |
| 1 | 0 | 1 | 1 | 1 | 1 | 154 | 7.5 | 45  |
| 1 | 0 | 1 | 1 | 1 | 1 | 155 | 7.5 | 45  |
| 1 | 0 | 1 | 1 | 1 | 1 | 156 | 7.5 | 45  |
| 1 | 0 | 1 | 1 | 1 | 1 | 157 | 7.5 | 45  |
| 1 | 0 | 1 | 1 | 1 | 1 | 158 | 7.5 | 45  |
| 1 | 0 | 1 | 1 | 1 | 1 | 159 | 7.5 | 45  |
| 1 | 0 | 1 | 1 | 1 | 1 | 160 | 7.5 | 45  |
| 1 | 0 | 1 | 1 | 1 | 1 | 161 | 7.5 | 45  |
| 1 | 0 | 1 | 1 | 1 | 1 | 162 | 7.5 | 45  |
| 1 | 0 | 1 | 1 | 1 | 1 | 163 | 7.5 | 45  |
| 1 | 0 | 1 | 1 | 1 | 1 | 164 | 7.5 | 45  |
| 1 | 0 | 1 | 1 | 1 | 1 | 165 | 7.5 | 45  |
| 1 | 0 | 1 | 1 | 1 | 1 | 166 | 7.5 | 45  |
| 1 | 0 | 1 | 1 | 1 | 1 | 167 | 7.5 | 45  |
| 1 | 0 | 1 | 1 | 1 | 1 | 168 | 7.5 | 45  |
| 1 | 0 | 1 | 1 | 1 | 1 | 169 | 7.5 | 45  |
| 1 | 0 | 1 | 1 | 1 | 1 | 170 | 7.5 | 45  |
| 1 | 0 | 1 | 1 | 1 | 1 | 171 | 7.5 | 45  |
| 1 | 0 | 1 | 1 | 1 | 1 | 172 | 7.5 | 45  |
| 1 | 0 | 1 | 1 | 1 | 1 | 173 | 7.5 | 45  |
| 1 | 0 | 1 | 1 | 1 | 1 | 174 | 7.5 | 45  |
| 1 | 0 | 1 | 1 | 1 | 1 | 175 | 7.5 | 45  |
| 1 | 0 | 1 | 1 | 1 | 1 | 176 | 7.5 | 45  |
| 1 | 0 | 1 | 1 | 1 | 1 | 177 | 7.5 | 45  |
| 1 | 0 | 1 | 1 | 1 | 1 | 178 | 7.5 | 45  |
| 1 | 0 | 1 | 1 | 1 | 1 | 179 | 7.5 | 45  |
| 1 | 0 | 1 | 1 | 1 | 1 | 180 | 7.5 | 45  |
| 1 | 1 | 1 | 1 | 1 | 1 | 0   | 7.5 | 270 |
| 1 | 1 | 1 | 1 | 1 | 1 | 1   | 7.5 | 270 |
| 1 | 1 | 1 | 1 | 1 | 1 | 2   | 7.5 | 270 |
| 1 | 1 | 1 | 1 | 1 | 1 | 3   | 7.5 | 270 |
| 1 | 1 | 1 | 1 | 1 | 1 | 4   | 7.5 | 270 |
| 1 | 1 | 1 | 1 | 1 | 1 | 5   | 7.5 | 270 |
| 1 | 1 | 1 | 1 | 1 | 1 | 6   | 7.5 | 270 |
| 1 | 1 | 1 | 1 | 1 | 1 | 7   | 7.5 | 270 |
| 1 | 1 | 1 | 1 | 1 | 1 | 8   | 7.5 | 270 |
| 1 | 1 | 1 | 1 | 1 | 1 | 9   | 7.5 | 270 |

|   |   |   |   |   |   |    |     |     |
|---|---|---|---|---|---|----|-----|-----|
| 1 | 1 | 1 | 1 | 1 | 1 | 10 | 7.5 | 270 |
| 1 | 1 | 1 | 1 | 1 | 1 | 11 | 7.5 | 270 |
| 1 | 1 | 1 | 1 | 1 | 1 | 12 | 7.5 | 270 |
| 1 | 1 | 1 | 1 | 1 | 1 | 13 | 7.5 | 270 |
| 1 | 1 | 1 | 1 | 1 | 1 | 14 | 7.5 | 270 |
| 1 | 1 | 1 | 1 | 1 | 1 | 15 | 7.5 | 270 |
| 1 | 1 | 1 | 1 | 1 | 1 | 16 | 7.5 | 270 |
| 1 | 1 | 1 | 1 | 1 | 1 | 17 | 7.5 | 270 |
| 1 | 1 | 1 | 1 | 1 | 1 | 18 | 7.5 | 270 |
| 1 | 1 | 1 | 1 | 1 | 1 | 19 | 7.5 | 270 |
| 1 | 1 | 1 | 1 | 1 | 1 | 20 | 7.5 | 270 |
| 1 | 1 | 1 | 1 | 1 | 1 | 21 | 7.5 | 270 |
| 1 | 1 | 1 | 1 | 1 | 1 | 22 | 7.5 | 270 |
| 1 | 1 | 1 | 1 | 1 | 1 | 23 | 7.5 | 270 |
| 1 | 1 | 1 | 1 | 1 | 1 | 24 | 7.5 | 270 |
| 1 | 1 | 1 | 1 | 1 | 1 | 25 | 7.5 | 270 |
| 1 | 1 | 1 | 1 | 1 | 1 | 26 | 7.5 | 270 |
| 1 | 1 | 1 | 1 | 1 | 1 | 27 | 7.5 | 270 |
| 1 | 1 | 1 | 1 | 1 | 1 | 28 | 7.5 | 270 |
| 1 | 1 | 1 | 1 | 1 | 1 | 29 | 7.5 | 270 |
| 1 | 1 | 1 | 1 | 1 | 1 | 30 | 7.5 | 270 |
| 1 | 1 | 1 | 1 | 1 | 1 | 31 | 7.5 | 270 |
| 1 | 1 | 1 | 1 | 1 | 1 | 32 | 7.5 | 270 |
| 1 | 1 | 1 | 1 | 1 | 1 | 33 | 7.5 | 270 |
| 1 | 1 | 1 | 1 | 1 | 1 | 34 | 7.5 | 270 |
| 1 | 1 | 1 | 1 | 1 | 1 | 35 | 7.5 | 270 |
| 1 | 1 | 1 | 1 | 1 | 1 | 36 | 7.5 | 270 |
| 1 | 1 | 1 | 1 | 1 | 1 | 37 | 7.5 | 270 |
| 1 | 1 | 1 | 1 | 1 | 1 | 38 | 7.5 | 270 |
| 1 | 1 | 1 | 1 | 1 | 1 | 39 | 7.5 | 270 |
| 1 | 1 | 1 | 1 | 1 | 1 | 40 | 7.5 | 270 |
| 1 | 1 | 1 | 1 | 1 | 1 | 41 | 7.5 | 270 |
| 1 | 1 | 1 | 1 | 1 | 1 | 42 | 7.5 | 270 |
| 1 | 1 | 1 | 1 | 1 | 1 | 43 | 7.5 | 270 |
| 1 | 1 | 1 | 1 | 1 | 1 | 44 | 7.5 | 270 |
| 1 | 1 | 1 | 1 | 1 | 1 | 45 | 7.5 | 270 |
| 1 | 1 | 1 | 1 | 1 | 1 | 46 | 7.5 | 270 |
| 1 | 1 | 1 | 1 | 1 | 1 | 47 | 7.5 | 270 |
| 1 | 1 | 1 | 1 | 1 | 1 | 48 | 7.5 | 270 |
| 1 | 1 | 1 | 1 | 1 | 1 | 49 | 7.5 | 270 |
| 1 | 1 | 1 | 1 | 1 | 1 | 50 | 7.5 | 270 |
| 1 | 1 | 1 | 1 | 1 | 1 | 51 | 7.5 | 270 |
| 1 | 1 | 1 | 1 | 1 | 1 | 52 | 7.5 | 270 |
| 1 | 1 | 1 | 1 | 1 | 1 | 53 | 7.5 | 270 |
| 1 | 1 | 1 | 1 | 1 | 1 | 54 | 7.5 | 270 |
| 1 | 1 | 1 | 1 | 1 | 1 | 55 | 7.5 | 270 |

|   |   |   |   |   |   |     |     |     |
|---|---|---|---|---|---|-----|-----|-----|
| 1 | 1 | 1 | 1 | 1 | 1 | 56  | 7.5 | 270 |
| 1 | 1 | 1 | 1 | 1 | 1 | 57  | 7.5 | 270 |
| 1 | 1 | 1 | 1 | 1 | 1 | 58  | 7.5 | 270 |
| 1 | 1 | 1 | 1 | 1 | 1 | 59  | 7.5 | 270 |
| 1 | 1 | 1 | 1 | 1 | 1 | 60  | 7.5 | 270 |
| 1 | 1 | 1 | 1 | 1 | 1 | 61  | 7.5 | 270 |
| 1 | 1 | 1 | 1 | 1 | 1 | 62  | 7.5 | 270 |
| 1 | 1 | 1 | 1 | 1 | 1 | 63  | 7.5 | 270 |
| 1 | 1 | 1 | 1 | 1 | 1 | 64  | 7.5 | 270 |
| 1 | 1 | 1 | 1 | 1 | 1 | 65  | 7.5 | 270 |
| 1 | 1 | 1 | 1 | 1 | 1 | 66  | 7.5 | 270 |
| 1 | 1 | 1 | 1 | 1 | 1 | 67  | 7.5 | 270 |
| 1 | 1 | 1 | 1 | 1 | 1 | 68  | 7.5 | 270 |
| 1 | 1 | 1 | 1 | 1 | 1 | 69  | 7.5 | 270 |
| 1 | 1 | 1 | 1 | 1 | 1 | 70  | 7.5 | 270 |
| 1 | 1 | 1 | 1 | 1 | 1 | 71  | 7.5 | 270 |
| 1 | 1 | 1 | 1 | 1 | 1 | 72  | 7.5 | 270 |
| 1 | 1 | 1 | 1 | 1 | 1 | 73  | 7.5 | 270 |
| 1 | 1 | 1 | 1 | 1 | 1 | 74  | 7.5 | 270 |
| 1 | 1 | 1 | 1 | 1 | 1 | 75  | 7.5 | 270 |
| 1 | 1 | 1 | 1 | 1 | 1 | 76  | 7.5 | 270 |
| 1 | 1 | 1 | 1 | 1 | 1 | 77  | 7.5 | 270 |
| 1 | 1 | 1 | 1 | 1 | 1 | 78  | 7.5 | 270 |
| 1 | 1 | 1 | 1 | 1 | 1 | 79  | 7.5 | 270 |
| 1 | 1 | 1 | 1 | 1 | 1 | 80  | 7.5 | 270 |
| 1 | 1 | 1 | 1 | 1 | 1 | 81  | 7.5 | 270 |
| 1 | 1 | 1 | 1 | 1 | 1 | 82  | 7.5 | 270 |
| 1 | 1 | 1 | 1 | 1 | 1 | 83  | 7.5 | 270 |
| 1 | 1 | 1 | 1 | 1 | 1 | 84  | 7.5 | 270 |
| 1 | 1 | 1 | 1 | 1 | 1 | 85  | 7.5 | 270 |
| 1 | 1 | 1 | 1 | 1 | 1 | 86  | 7.5 | 270 |
| 1 | 1 | 1 | 1 | 1 | 1 | 87  | 7.5 | 270 |
| 1 | 1 | 1 | 1 | 1 | 1 | 88  | 7.5 | 270 |
| 1 | 1 | 1 | 1 | 1 | 1 | 89  | 7.5 | 270 |
| 1 | 1 | 1 | 1 | 1 | 1 | 90  | 7.5 | 270 |
| 1 | 1 | 1 | 1 | 1 | 1 | 91  | 7.5 | 270 |
| 1 | 1 | 1 | 1 | 1 | 1 | 92  | 7.5 | 270 |
| 1 | 1 | 1 | 1 | 1 | 1 | 93  | 7.5 | 270 |
| 1 | 1 | 1 | 1 | 1 | 1 | 94  | 7.5 | 270 |
| 1 | 1 | 1 | 1 | 1 | 1 | 95  | 7.5 | 270 |
| 1 | 1 | 1 | 1 | 1 | 1 | 96  | 7.5 | 270 |
| 1 | 1 | 1 | 1 | 1 | 1 | 97  | 7.5 | 270 |
| 1 | 1 | 1 | 1 | 1 | 1 | 98  | 7.5 | 270 |
| 1 | 1 | 1 | 1 | 1 | 1 | 99  | 7.5 | 270 |
| 1 | 1 | 1 | 1 | 1 | 1 | 100 | 7.5 | 270 |
| 1 | 1 | 1 | 1 | 1 | 1 | 101 | 7.5 | 270 |

|   |   |   |   |   |   |     |     |     |
|---|---|---|---|---|---|-----|-----|-----|
| 1 | 1 | 1 | 1 | 1 | 1 | 102 | 7.5 | 270 |
| 1 | 1 | 1 | 1 | 1 | 1 | 103 | 7.5 | 270 |
| 1 | 1 | 1 | 1 | 1 | 1 | 104 | 7.5 | 270 |
| 1 | 1 | 1 | 1 | 1 | 1 | 105 | 7.5 | 270 |
| 1 | 1 | 1 | 1 | 1 | 1 | 106 | 7.5 | 270 |
| 1 | 1 | 1 | 1 | 1 | 1 | 107 | 7.5 | 270 |
| 1 | 1 | 1 | 1 | 1 | 1 | 108 | 7.5 | 270 |
| 1 | 1 | 1 | 1 | 1 | 1 | 109 | 7.5 | 270 |
| 1 | 1 | 1 | 1 | 1 | 1 | 110 | 7.5 | 270 |
| 1 | 1 | 1 | 1 | 1 | 1 | 111 | 7.5 | 270 |
| 1 | 1 | 1 | 1 | 1 | 1 | 112 | 7.5 | 270 |
| 1 | 1 | 1 | 1 | 1 | 1 | 113 | 7.5 | 270 |
| 1 | 1 | 1 | 1 | 1 | 1 | 114 | 7.5 | 270 |
| 1 | 1 | 1 | 1 | 1 | 1 | 115 | 7.5 | 270 |
| 1 | 1 | 1 | 1 | 1 | 1 | 116 | 7.5 | 270 |
| 1 | 1 | 1 | 1 | 1 | 1 | 117 | 7.5 | 270 |
| 1 | 1 | 1 | 1 | 1 | 1 | 118 | 7.5 | 270 |
| 1 | 1 | 1 | 1 | 1 | 1 | 119 | 7.5 | 270 |
| 1 | 1 | 1 | 1 | 1 | 1 | 120 | 7.5 | 270 |
| 1 | 1 | 1 | 1 | 1 | 1 | 121 | 7.5 | 270 |
| 1 | 1 | 1 | 1 | 1 | 1 | 122 | 7.5 | 270 |
| 1 | 1 | 1 | 1 | 1 | 1 | 123 | 7.5 | 270 |
| 1 | 1 | 1 | 1 | 1 | 1 | 124 | 7.5 | 270 |
| 1 | 1 | 1 | 1 | 1 | 1 | 125 | 7.5 | 270 |
| 1 | 1 | 1 | 1 | 1 | 1 | 126 | 7.5 | 270 |
| 1 | 1 | 1 | 1 | 1 | 1 | 127 | 7.5 | 270 |
| 1 | 1 | 1 | 1 | 1 | 1 | 128 | 7.5 | 270 |
| 1 | 1 | 1 | 1 | 1 | 1 | 129 | 7.5 | 270 |
| 1 | 1 | 1 | 1 | 1 | 1 | 130 | 7.5 | 270 |
| 1 | 1 | 1 | 1 | 1 | 1 | 131 | 7.5 | 270 |
| 1 | 1 | 1 | 1 | 1 | 1 | 132 | 7.5 | 270 |
| 1 | 1 | 1 | 1 | 1 | 1 | 133 | 7.5 | 270 |
| 1 | 1 | 1 | 1 | 1 | 1 | 134 | 7.5 | 270 |
| 1 | 1 | 1 | 1 | 1 | 1 | 135 | 7.5 | 270 |
| 1 | 1 | 1 | 1 | 1 | 1 | 136 | 7.5 | 270 |
| 1 | 1 | 1 | 1 | 1 | 1 | 137 | 7.5 | 270 |
| 1 | 1 | 1 | 1 | 1 | 1 | 138 | 7.5 | 270 |
| 1 | 1 | 1 | 1 | 1 | 1 | 139 | 7.5 | 270 |
| 1 | 1 | 1 | 1 | 1 | 1 | 140 | 7.5 | 270 |
| 1 | 1 | 1 | 1 | 1 | 1 | 141 | 7.5 | 270 |
| 1 | 1 | 1 | 1 | 1 | 1 | 142 | 7.5 | 270 |
| 1 | 1 | 1 | 1 | 1 | 1 | 143 | 7.5 | 270 |
| 1 | 1 | 1 | 1 | 1 | 1 | 144 | 7.5 | 270 |
| 1 | 1 | 1 | 1 | 1 | 1 | 145 | 7.5 | 270 |
| 1 | 1 | 1 | 1 | 1 | 1 | 146 | 7.5 | 270 |
| 1 | 1 | 1 | 1 | 1 | 1 | 147 | 7.5 | 270 |

|   |   |   |   |   |   |     |     |     |
|---|---|---|---|---|---|-----|-----|-----|
| 1 | 1 | 1 | 1 | 1 | 1 | 148 | 7.5 | 270 |
| 1 | 1 | 1 | 1 | 1 | 1 | 149 | 7.5 | 270 |
| 1 | 1 | 1 | 1 | 1 | 1 | 150 | 7.5 | 270 |
| 1 | 1 | 1 | 1 | 1 | 1 | 151 | 7.5 | 270 |
| 1 | 1 | 1 | 1 | 1 | 1 | 152 | 7.5 | 270 |
| 1 | 1 | 1 | 1 | 1 | 1 | 153 | 7.5 | 270 |
| 1 | 1 | 1 | 1 | 1 | 1 | 154 | 7.5 | 270 |
| 1 | 1 | 1 | 1 | 1 | 1 | 155 | 7.5 | 270 |
| 1 | 1 | 1 | 1 | 1 | 1 | 156 | 7.5 | 270 |
| 1 | 1 | 1 | 1 | 1 | 1 | 157 | 7.5 | 270 |
| 1 | 1 | 1 | 1 | 1 | 1 | 158 | 7.5 | 270 |
| 1 | 1 | 1 | 1 | 1 | 1 | 159 | 7.5 | 270 |
| 1 | 1 | 1 | 1 | 1 | 1 | 160 | 7.5 | 270 |
| 1 | 1 | 1 | 1 | 1 | 1 | 161 | 7.5 | 270 |
| 1 | 1 | 1 | 1 | 1 | 1 | 162 | 7.5 | 270 |
| 1 | 1 | 1 | 1 | 1 | 1 | 163 | 7.5 | 270 |
| 1 | 1 | 1 | 1 | 1 | 1 | 164 | 7.5 | 270 |
| 1 | 1 | 1 | 1 | 1 | 1 | 165 | 7.5 | 270 |
| 1 | 1 | 1 | 1 | 1 | 1 | 166 | 7.5 | 270 |
| 1 | 1 | 1 | 1 | 1 | 1 | 167 | 7.5 | 270 |
| 1 | 1 | 1 | 1 | 1 | 1 | 168 | 7.5 | 270 |
| 1 | 1 | 1 | 1 | 1 | 1 | 169 | 7.5 | 270 |
| 1 | 1 | 1 | 1 | 1 | 1 | 170 | 7.5 | 270 |
| 1 | 1 | 1 | 1 | 1 | 1 | 171 | 7.5 | 270 |
| 1 | 1 | 1 | 1 | 1 | 1 | 172 | 7.5 | 270 |
| 1 | 1 | 1 | 1 | 1 | 1 | 173 | 7.5 | 270 |
| 1 | 1 | 1 | 1 | 1 | 1 | 174 | 7.5 | 270 |
| 1 | 1 | 1 | 1 | 1 | 1 | 175 | 7.5 | 270 |
| 1 | 1 | 1 | 1 | 1 | 1 | 176 | 7.5 | 270 |
| 1 | 1 | 1 | 1 | 1 | 1 | 177 | 7.5 | 270 |
| 1 | 1 | 1 | 1 | 1 | 1 | 178 | 7.5 | 270 |
| 1 | 1 | 1 | 1 | 1 | 1 | 179 | 7.5 | 270 |
| 1 | 1 | 1 | 1 | 1 | 1 | 180 | 7.5 | 270 |
| 0 | 1 | 1 | 0 | 0 | 0 | 0   | 7.5 | 0   |
| 0 | 1 | 1 | 0 | 0 | 0 | 1   | 7.5 | 15  |
| 0 | 1 | 1 | 0 | 0 | 0 | 2   | 7.5 | 15  |
| 0 | 1 | 1 | 0 | 0 | 0 | 3   | 7.5 | 15  |
| 0 | 1 | 1 | 0 | 0 | 0 | 4   | 7.5 | 15  |
| 0 | 1 | 1 | 0 | 0 | 0 | 5   | 7.5 | 15  |
| 0 | 1 | 1 | 0 | 0 | 0 | 6   | 7.5 | 15  |
| 0 | 1 | 1 | 0 | 0 | 0 | 7   | 7.5 | 15  |
| 0 | 1 | 1 | 0 | 0 | 0 | 8   | 7.5 | 15  |
| 0 | 1 | 1 | 0 | 0 | 0 | 9   | 7.5 | 15  |
| 0 | 1 | 1 | 0 | 0 | 0 | 10  | 7.5 | 15  |
| 0 | 1 | 1 | 0 | 0 | 0 | 11  | 7.5 | 15  |
| 0 | 1 | 1 | 0 | 0 | 0 | 12  | 7.5 | 15  |

|   |   |   |   |   |   |    |     |    |
|---|---|---|---|---|---|----|-----|----|
| 0 | 1 | 1 | 0 | 0 | 0 | 13 | 7.5 | 15 |
| 0 | 1 | 1 | 0 | 0 | 0 | 14 | 7.5 | 15 |
| 0 | 1 | 1 | 0 | 0 | 0 | 15 | 7.5 | 15 |
| 0 | 1 | 1 | 0 | 0 | 0 | 16 | 7.5 | 15 |
| 0 | 1 | 1 | 0 | 0 | 0 | 17 | 7.5 | 15 |
| 0 | 1 | 1 | 0 | 0 | 0 | 18 | 7.5 | 15 |
| 0 | 1 | 1 | 0 | 0 | 0 | 19 | 7.5 | 15 |
| 0 | 1 | 1 | 0 | 0 | 0 | 20 | 7.5 | 15 |
| 0 | 1 | 1 | 0 | 0 | 0 | 21 | 7.5 | 15 |
| 0 | 1 | 1 | 0 | 0 | 0 | 22 | 7.5 | 15 |
| 0 | 1 | 1 | 0 | 0 | 0 | 23 | 7.5 | 15 |
| 0 | 1 | 1 | 0 | 0 | 0 | 24 | 7.5 | 15 |
| 0 | 1 | 1 | 0 | 0 | 0 | 25 | 7.5 | 15 |
| 0 | 1 | 1 | 0 | 0 | 0 | 26 | 7.5 | 15 |
| 0 | 1 | 1 | 0 | 0 | 0 | 27 | 7.5 | 15 |
| 0 | 1 | 1 | 0 | 0 | 0 | 28 | 7.5 | 15 |
| 0 | 1 | 1 | 0 | 0 | 0 | 29 | 7.5 | 15 |
| 0 | 1 | 1 | 0 | 0 | 0 | 30 | 7.5 | 15 |
| 0 | 1 | 1 | 0 | 0 | 0 | 31 | 7.5 | 15 |
| 0 | 1 | 1 | 0 | 0 | 0 | 32 | 7.5 | 15 |
| 0 | 1 | 1 | 0 | 0 | 0 | 33 | 7.5 | 15 |
| 0 | 1 | 1 | 0 | 0 | 0 | 34 | 7.5 | 15 |
| 0 | 1 | 1 | 0 | 0 | 0 | 35 | 7.5 | 15 |
| 0 | 1 | 1 | 0 | 0 | 0 | 36 | 7.5 | 15 |
| 0 | 1 | 1 | 0 | 0 | 0 | 37 | 7.5 | 15 |
| 0 | 1 | 1 | 0 | 0 | 0 | 38 | 7.5 | 15 |
| 0 | 1 | 1 | 0 | 0 | 0 | 39 | 7.5 | 15 |
| 0 | 1 | 1 | 0 | 0 | 0 | 40 | 7.5 | 15 |
| 0 | 1 | 1 | 0 | 0 | 0 | 41 | 7.5 | 15 |
| 0 | 1 | 1 | 0 | 0 | 0 | 42 | 7.5 | 15 |
| 0 | 1 | 1 | 0 | 0 | 0 | 43 | 7.5 | 15 |
| 0 | 1 | 1 | 0 | 0 | 0 | 44 | 7.5 | 15 |
| 0 | 1 | 1 | 0 | 0 | 0 | 45 | 7.5 | 15 |
| 0 | 1 | 1 | 0 | 0 | 0 | 46 | 7.5 | 15 |
| 0 | 1 | 1 | 0 | 0 | 0 | 47 | 7.5 | 15 |
| 0 | 1 | 1 | 0 | 0 | 0 | 48 | 7.5 | 15 |
| 0 | 1 | 1 | 0 | 0 | 0 | 49 | 7.5 | 15 |
| 0 | 1 | 1 | 0 | 0 | 0 | 50 | 7.5 | 15 |
| 0 | 1 | 1 | 0 | 0 | 0 | 51 | 7.5 | 15 |
| 0 | 1 | 1 | 0 | 0 | 0 | 52 | 7.5 | 15 |
| 0 | 1 | 1 | 0 | 0 | 0 | 53 | 7.5 | 15 |
| 0 | 1 | 1 | 0 | 0 | 0 | 54 | 7.5 | 15 |
| 0 | 1 | 1 | 0 | 0 | 0 | 55 | 7.5 | 15 |
| 0 | 1 | 1 | 0 | 0 | 0 | 56 | 7.5 | 15 |
| 0 | 1 | 1 | 0 | 0 | 0 | 57 | 7.5 | 15 |
| 0 | 1 | 1 | 0 | 0 | 0 | 58 | 7.5 | 15 |

|   |   |   |   |   |   |     |     |     |
|---|---|---|---|---|---|-----|-----|-----|
| 0 | 1 | 1 | 0 | 0 | 0 | 59  | 7.5 | 15  |
| 0 | 1 | 1 | 0 | 0 | 0 | 60  | 7.5 | 105 |
| 0 | 1 | 1 | 0 | 0 | 0 | 61  | 7.5 | 105 |
| 0 | 1 | 1 | 0 | 0 | 0 | 62  | 7.5 | 105 |
| 0 | 1 | 1 | 0 | 0 | 0 | 63  | 7.5 | 105 |
| 0 | 1 | 1 | 0 | 0 | 0 | 64  | 7.5 | 105 |
| 0 | 1 | 1 | 0 | 0 | 0 | 65  | 7.5 | 105 |
| 0 | 1 | 1 | 0 | 0 | 0 | 66  | 7.5 | 105 |
| 0 | 1 | 1 | 0 | 0 | 0 | 67  | 7.5 | 105 |
| 0 | 1 | 1 | 0 | 0 | 0 | 68  | 7.5 | 105 |
| 0 | 1 | 1 | 0 | 0 | 0 | 69  | 7.5 | 105 |
| 0 | 1 | 1 | 0 | 0 | 0 | 70  | 7.5 | 105 |
| 0 | 1 | 1 | 0 | 0 | 0 | 71  | 7.5 | 105 |
| 0 | 1 | 1 | 0 | 0 | 0 | 72  | 7.5 | 105 |
| 0 | 1 | 1 | 0 | 0 | 0 | 73  | 7.5 | 105 |
| 0 | 1 | 1 | 0 | 0 | 0 | 74  | 7.5 | 105 |
| 0 | 1 | 1 | 0 | 0 | 0 | 75  | 7.5 | 105 |
| 0 | 1 | 1 | 0 | 0 | 0 | 76  | 7.5 | 105 |
| 0 | 1 | 1 | 0 | 0 | 0 | 77  | 7.5 | 105 |
| 0 | 1 | 1 | 0 | 0 | 0 | 78  | 7.5 | 105 |
| 0 | 1 | 1 | 0 | 0 | 0 | 79  | 7.5 | 105 |
| 0 | 1 | 1 | 0 | 0 | 0 | 80  | 7.5 | 105 |
| 0 | 1 | 1 | 0 | 0 | 0 | 81  | 7.5 | 105 |
| 0 | 1 | 1 | 0 | 0 | 0 | 82  | 7.5 | 105 |
| 0 | 1 | 1 | 0 | 0 | 0 | 83  | 7.5 | 105 |
| 0 | 1 | 1 | 0 | 0 | 0 | 84  | 7.5 | 105 |
| 0 | 1 | 1 | 0 | 0 | 0 | 85  | 7.5 | 105 |
| 0 | 1 | 1 | 0 | 0 | 0 | 86  | 7.5 | 105 |
| 0 | 1 | 1 | 0 | 0 | 0 | 87  | 7.5 | 105 |
| 0 | 1 | 1 | 0 | 0 | 0 | 88  | 7.5 | 105 |
| 0 | 1 | 1 | 0 | 0 | 0 | 89  | 7.5 | 105 |
| 0 | 1 | 1 | 0 | 0 | 0 | 90  | 7.5 | 105 |
| 0 | 1 | 1 | 0 | 0 | 0 | 91  | 7.5 | 105 |
| 0 | 1 | 1 | 0 | 0 | 0 | 92  | 7.5 | 105 |
| 0 | 1 | 1 | 0 | 0 | 0 | 93  | 7.5 | 105 |
| 0 | 1 | 1 | 0 | 0 | 0 | 94  | 7.5 | 105 |
| 0 | 1 | 1 | 0 | 0 | 0 | 95  | 7.5 | 105 |
| 0 | 1 | 1 | 0 | 0 | 0 | 96  | 7.5 | 105 |
| 0 | 1 | 1 | 0 | 0 | 0 | 97  | 7.5 | 105 |
| 0 | 1 | 1 | 0 | 0 | 0 | 98  | 7.5 | 105 |
| 0 | 1 | 1 | 0 | 0 | 0 | 99  | 7.5 | 105 |
| 0 | 1 | 1 | 0 | 0 | 0 | 100 | 7.5 | 105 |
| 0 | 1 | 1 | 0 | 0 | 0 | 101 | 7.5 | 105 |
| 0 | 1 | 1 | 0 | 0 | 0 | 102 | 7.5 | 105 |
| 0 | 1 | 1 | 0 | 0 | 0 | 103 | 7.5 | 105 |
| 0 | 1 | 1 | 0 | 0 | 0 | 104 | 7.5 | 105 |

|   |   |   |   |   |   |     |     |     |
|---|---|---|---|---|---|-----|-----|-----|
| 0 | 1 | 1 | 0 | 0 | 0 | 105 | 7.5 | 105 |
| 0 | 1 | 1 | 0 | 0 | 0 | 106 | 7.5 | 105 |
| 0 | 1 | 1 | 0 | 0 | 0 | 107 | 7.5 | 105 |
| 0 | 1 | 1 | 0 | 0 | 0 | 108 | 7.5 | 105 |
| 0 | 1 | 1 | 0 | 0 | 0 | 109 | 7.5 | 105 |
| 0 | 1 | 1 | 0 | 0 | 0 | 110 | 7.5 | 105 |
| 0 | 1 | 1 | 0 | 0 | 0 | 111 | 7.5 | 105 |
| 0 | 1 | 1 | 0 | 0 | 0 | 112 | 7.5 | 105 |
| 0 | 1 | 1 | 0 | 0 | 0 | 113 | 7.5 | 105 |
| 0 | 1 | 1 | 0 | 0 | 0 | 114 | 7.5 | 105 |
| 0 | 1 | 1 | 0 | 0 | 0 | 115 | 7.5 | 105 |
| 0 | 1 | 1 | 0 | 0 | 0 | 116 | 7.5 | 105 |
| 0 | 1 | 1 | 0 | 0 | 0 | 117 | 7.5 | 105 |
| 0 | 1 | 1 | 0 | 0 | 0 | 118 | 7.5 | 105 |
| 0 | 1 | 1 | 0 | 0 | 0 | 119 | 7.5 | 105 |
| 0 | 1 | 1 | 0 | 0 | 0 | 120 | 7.5 | 120 |
| 0 | 1 | 1 | 0 | 0 | 0 | 121 | 7.5 | 135 |
| 0 | 1 | 1 | 0 | 0 | 0 | 122 | 7.5 | 135 |
| 0 | 1 | 1 | 0 | 0 | 0 | 123 | 7.5 | 135 |
| 0 | 1 | 1 | 0 | 0 | 0 | 124 | 7.5 | 135 |
| 0 | 1 | 1 | 0 | 0 | 0 | 125 | 7.5 | 135 |
| 0 | 1 | 1 | 0 | 0 | 0 | 126 | 7.5 | 135 |
| 0 | 1 | 1 | 0 | 0 | 0 | 127 | 7.5 | 135 |
| 0 | 1 | 1 | 0 | 0 | 0 | 128 | 7.5 | 135 |
| 0 | 1 | 1 | 0 | 0 | 0 | 129 | 7.5 | 135 |
| 0 | 1 | 1 | 0 | 0 | 0 | 130 | 7.5 | 135 |
| 0 | 1 | 1 | 0 | 0 | 0 | 131 | 7.5 | 135 |
| 0 | 1 | 1 | 0 | 0 | 0 | 132 | 7.5 | 135 |
| 0 | 1 | 1 | 0 | 0 | 0 | 133 | 7.5 | 135 |
| 0 | 1 | 1 | 0 | 0 | 0 | 134 | 7.5 | 135 |
| 0 | 1 | 1 | 0 | 0 | 0 | 135 | 7.5 | 135 |
| 0 | 1 | 1 | 0 | 0 | 0 | 136 | 7.5 | 135 |
| 0 | 1 | 1 | 0 | 0 | 0 | 137 | 7.5 | 135 |
| 0 | 1 | 1 | 0 | 0 | 0 | 138 | 7.5 | 135 |
| 0 | 1 | 1 | 0 | 0 | 0 | 139 | 7.5 | 135 |
| 0 | 1 | 1 | 0 | 0 | 0 | 140 | 7.5 | 135 |
| 0 | 1 | 1 | 0 | 0 | 0 | 141 | 7.5 | 135 |
| 0 | 1 | 1 | 0 | 0 | 0 | 142 | 7.5 | 135 |
| 0 | 1 | 1 | 0 | 0 | 0 | 143 | 7.5 | 135 |
| 0 | 1 | 1 | 0 | 0 | 0 | 144 | 7.5 | 135 |
| 0 | 1 | 1 | 0 | 0 | 0 | 145 | 7.5 | 135 |
| 0 | 1 | 1 | 0 | 0 | 0 | 146 | 7.5 | 135 |
| 0 | 1 | 1 | 0 | 0 | 0 | 147 | 7.5 | 135 |
| 0 | 1 | 1 | 0 | 0 | 0 | 148 | 7.5 | 135 |
| 0 | 1 | 1 | 0 | 0 | 0 | 149 | 7.5 | 135 |
| 0 | 1 | 1 | 0 | 0 | 0 | 150 | 7.5 | 150 |

|   |   |   |   |   |   |     |     |     |
|---|---|---|---|---|---|-----|-----|-----|
| 0 | 1 | 1 | 0 | 0 | 0 | 151 | 7.5 | 165 |
| 0 | 1 | 1 | 0 | 0 | 0 | 152 | 7.5 | 165 |
| 0 | 1 | 1 | 0 | 0 | 0 | 153 | 7.5 | 165 |
| 0 | 1 | 1 | 0 | 0 | 0 | 154 | 7.5 | 165 |
| 0 | 1 | 1 | 0 | 0 | 0 | 155 | 7.5 | 165 |
| 0 | 1 | 1 | 0 | 0 | 0 | 156 | 7.5 | 165 |
| 0 | 1 | 1 | 0 | 0 | 0 | 157 | 7.5 | 165 |
| 0 | 1 | 1 | 0 | 0 | 0 | 158 | 7.5 | 165 |
| 0 | 1 | 1 | 0 | 0 | 0 | 159 | 7.5 | 165 |
| 0 | 1 | 1 | 0 | 0 | 0 | 160 | 7.5 | 165 |
| 0 | 1 | 1 | 0 | 0 | 0 | 161 | 7.5 | 165 |
| 0 | 1 | 1 | 0 | 0 | 0 | 162 | 7.5 | 165 |
| 0 | 1 | 1 | 0 | 0 | 0 | 163 | 7.5 | 165 |
| 0 | 1 | 1 | 0 | 0 | 0 | 164 | 7.5 | 165 |
| 0 | 1 | 1 | 0 | 0 | 0 | 165 | 7.5 | 165 |
| 0 | 1 | 1 | 0 | 0 | 0 | 166 | 7.5 | 165 |
| 0 | 1 | 1 | 0 | 0 | 0 | 167 | 7.5 | 165 |
| 0 | 1 | 1 | 0 | 0 | 0 | 168 | 7.5 | 165 |
| 0 | 1 | 1 | 0 | 0 | 0 | 169 | 7.5 | 165 |
| 0 | 1 | 1 | 0 | 0 | 0 | 170 | 7.5 | 165 |
| 0 | 1 | 1 | 0 | 0 | 0 | 171 | 7.5 | 165 |
| 0 | 1 | 1 | 0 | 0 | 0 | 172 | 7.5 | 165 |
| 0 | 1 | 1 | 0 | 0 | 0 | 173 | 7.5 | 165 |
| 0 | 1 | 1 | 0 | 0 | 0 | 174 | 7.5 | 165 |
| 0 | 1 | 1 | 0 | 0 | 0 | 175 | 7.5 | 165 |
| 0 | 1 | 1 | 0 | 0 | 0 | 176 | 7.5 | 165 |
| 0 | 1 | 1 | 0 | 0 | 0 | 177 | 7.5 | 165 |
| 0 | 1 | 1 | 0 | 0 | 0 | 178 | 7.5 | 165 |
| 0 | 1 | 1 | 0 | 0 | 0 | 179 | 7.5 | 165 |
| 0 | 1 | 1 | 0 | 0 | 0 | 180 | 7.5 | 180 |
| 0 | 1 | 0 | 1 | 0 | 0 | 0   | 7.5 | 0   |
| 0 | 1 | 0 | 1 | 0 | 0 | 1   | 7.5 | 15  |
| 0 | 1 | 0 | 1 | 0 | 0 | 2   | 7.5 | 15  |
| 0 | 1 | 0 | 1 | 0 | 0 | 3   | 7.5 | 15  |
| 0 | 1 | 0 | 1 | 0 | 0 | 4   | 7.5 | 15  |
| 0 | 1 | 0 | 1 | 0 | 0 | 5   | 7.5 | 15  |
| 0 | 1 | 0 | 1 | 0 | 0 | 6   | 7.5 | 15  |
| 0 | 1 | 0 | 1 | 0 | 0 | 7   | 7.5 | 15  |
| 0 | 1 | 0 | 1 | 0 | 0 | 8   | 7.5 | 15  |
| 0 | 1 | 0 | 1 | 0 | 0 | 9   | 7.5 | 15  |
| 0 | 1 | 0 | 1 | 0 | 0 | 10  | 7.5 | 15  |
| 0 | 1 | 0 | 1 | 0 | 0 | 11  | 7.5 | 15  |
| 0 | 1 | 0 | 1 | 0 | 0 | 12  | 7.5 | 15  |
| 0 | 1 | 0 | 1 | 0 | 0 | 13  | 7.5 | 15  |
| 0 | 1 | 0 | 1 | 0 | 0 | 14  | 7.5 | 15  |
| 0 | 1 | 0 | 1 | 0 | 0 | 15  | 7.5 | 15  |

|   |   |   |   |   |   |    |     |    |
|---|---|---|---|---|---|----|-----|----|
| 0 | 1 | 0 | 1 | 0 | 0 | 16 | 7.5 | 15 |
| 0 | 1 | 0 | 1 | 0 | 0 | 17 | 7.5 | 15 |
| 0 | 1 | 0 | 1 | 0 | 0 | 18 | 7.5 | 15 |
| 0 | 1 | 0 | 1 | 0 | 0 | 19 | 7.5 | 15 |
| 0 | 1 | 0 | 1 | 0 | 0 | 20 | 7.5 | 15 |
| 0 | 1 | 0 | 1 | 0 | 0 | 21 | 7.5 | 15 |
| 0 | 1 | 0 | 1 | 0 | 0 | 22 | 7.5 | 15 |
| 0 | 1 | 0 | 1 | 0 | 0 | 23 | 7.5 | 15 |
| 0 | 1 | 0 | 1 | 0 | 0 | 24 | 7.5 | 15 |
| 0 | 1 | 0 | 1 | 0 | 0 | 25 | 7.5 | 15 |
| 0 | 1 | 0 | 1 | 0 | 0 | 26 | 7.5 | 15 |
| 0 | 1 | 0 | 1 | 0 | 0 | 27 | 7.5 | 15 |
| 0 | 1 | 0 | 1 | 0 | 0 | 28 | 7.5 | 15 |
| 0 | 1 | 0 | 1 | 0 | 0 | 29 | 7.5 | 15 |
| 0 | 1 | 0 | 1 | 0 | 0 | 30 | 7.5 | 15 |
| 0 | 1 | 0 | 1 | 0 | 0 | 31 | 7.5 | 15 |
| 0 | 1 | 0 | 1 | 0 | 0 | 32 | 7.5 | 15 |
| 0 | 1 | 0 | 1 | 0 | 0 | 33 | 7.5 | 15 |
| 0 | 1 | 0 | 1 | 0 | 0 | 34 | 7.5 | 15 |
| 0 | 1 | 0 | 1 | 0 | 0 | 35 | 7.5 | 15 |
| 0 | 1 | 0 | 1 | 0 | 0 | 36 | 7.5 | 15 |
| 0 | 1 | 0 | 1 | 0 | 0 | 37 | 7.5 | 15 |
| 0 | 1 | 0 | 1 | 0 | 0 | 38 | 7.5 | 15 |
| 0 | 1 | 0 | 1 | 0 | 0 | 39 | 7.5 | 15 |
| 0 | 1 | 0 | 1 | 0 | 0 | 40 | 7.5 | 15 |
| 0 | 1 | 0 | 1 | 0 | 0 | 41 | 7.5 | 15 |
| 0 | 1 | 0 | 1 | 0 | 0 | 42 | 7.5 | 15 |
| 0 | 1 | 0 | 1 | 0 | 0 | 43 | 7.5 | 15 |
| 0 | 1 | 0 | 1 | 0 | 0 | 44 | 7.5 | 15 |
| 0 | 1 | 0 | 1 | 0 | 0 | 45 | 7.5 | 15 |
| 0 | 1 | 0 | 1 | 0 | 0 | 46 | 7.5 | 75 |
| 0 | 1 | 0 | 1 | 0 | 0 | 47 | 7.5 | 75 |
| 0 | 1 | 0 | 1 | 0 | 0 | 48 | 7.5 | 75 |
| 0 | 1 | 0 | 1 | 0 | 0 | 49 | 7.5 | 75 |
| 0 | 1 | 0 | 1 | 0 | 0 | 50 | 7.5 | 75 |
| 0 | 1 | 0 | 1 | 0 | 0 | 51 | 7.5 | 75 |
| 0 | 1 | 0 | 1 | 0 | 0 | 52 | 7.5 | 75 |
| 0 | 1 | 0 | 1 | 0 | 0 | 53 | 7.5 | 75 |
| 0 | 1 | 0 | 1 | 0 | 0 | 54 | 7.5 | 75 |
| 0 | 1 | 0 | 1 | 0 | 0 | 55 | 7.5 | 75 |
| 0 | 1 | 0 | 1 | 0 | 0 | 56 | 7.5 | 75 |
| 0 | 1 | 0 | 1 | 0 | 0 | 57 | 7.5 | 75 |
| 0 | 1 | 0 | 1 | 0 | 0 | 58 | 7.5 | 75 |
| 0 | 1 | 0 | 1 | 0 | 0 | 59 | 7.5 | 75 |
| 0 | 1 | 0 | 1 | 0 | 0 | 60 | 7.5 | 75 |
| 0 | 1 | 0 | 1 | 0 | 0 | 61 | 7.5 | 75 |

|   |   |   |   |   |   |     |     |     |
|---|---|---|---|---|---|-----|-----|-----|
| 0 | 1 | 0 | 1 | 0 | 0 | 62  | 7.5 | 75  |
| 0 | 1 | 0 | 1 | 0 | 0 | 63  | 7.5 | 75  |
| 0 | 1 | 0 | 1 | 0 | 0 | 64  | 7.5 | 75  |
| 0 | 1 | 0 | 1 | 0 | 0 | 65  | 7.5 | 75  |
| 0 | 1 | 0 | 1 | 0 | 0 | 66  | 7.5 | 75  |
| 0 | 1 | 0 | 1 | 0 | 0 | 67  | 7.5 | 75  |
| 0 | 1 | 0 | 1 | 0 | 0 | 68  | 7.5 | 75  |
| 0 | 1 | 0 | 1 | 0 | 0 | 69  | 7.5 | 75  |
| 0 | 1 | 0 | 1 | 0 | 0 | 70  | 7.5 | 75  |
| 0 | 1 | 0 | 1 | 0 | 0 | 71  | 7.5 | 75  |
| 0 | 1 | 0 | 1 | 0 | 0 | 72  | 7.5 | 75  |
| 0 | 1 | 0 | 1 | 0 | 0 | 73  | 7.5 | 75  |
| 0 | 1 | 0 | 1 | 0 | 0 | 74  | 7.5 | 75  |
| 0 | 1 | 0 | 1 | 0 | 0 | 75  | 7.5 | 75  |
| 0 | 1 | 0 | 1 | 0 | 0 | 76  | 7.5 | 75  |
| 0 | 1 | 0 | 1 | 0 | 0 | 77  | 7.5 | 75  |
| 0 | 1 | 0 | 1 | 0 | 0 | 78  | 7.5 | 75  |
| 0 | 1 | 0 | 1 | 0 | 0 | 79  | 7.5 | 75  |
| 0 | 1 | 0 | 1 | 0 | 0 | 80  | 7.5 | 75  |
| 0 | 1 | 0 | 1 | 0 | 0 | 81  | 7.5 | 75  |
| 0 | 1 | 0 | 1 | 0 | 0 | 82  | 7.5 | 75  |
| 0 | 1 | 0 | 1 | 0 | 0 | 83  | 7.5 | 75  |
| 0 | 1 | 0 | 1 | 0 | 0 | 84  | 7.5 | 75  |
| 0 | 1 | 0 | 1 | 0 | 0 | 85  | 7.5 | 75  |
| 0 | 1 | 0 | 1 | 0 | 0 | 86  | 7.5 | 75  |
| 0 | 1 | 0 | 1 | 0 | 0 | 87  | 7.5 | 75  |
| 0 | 1 | 0 | 1 | 0 | 0 | 88  | 7.5 | 75  |
| 0 | 1 | 0 | 1 | 0 | 0 | 89  | 7.5 | 75  |
| 0 | 1 | 0 | 1 | 0 | 0 | 90  | 7.5 | 75  |
| 0 | 1 | 0 | 1 | 0 | 0 | 91  | 7.5 | 75  |
| 0 | 1 | 0 | 1 | 0 | 0 | 92  | 7.5 | 75  |
| 0 | 1 | 0 | 1 | 0 | 0 | 93  | 7.5 | 75  |
| 0 | 1 | 0 | 1 | 0 | 0 | 94  | 7.5 | 75  |
| 0 | 1 | 0 | 1 | 0 | 0 | 95  | 7.5 | 75  |
| 0 | 1 | 0 | 1 | 0 | 0 | 96  | 7.5 | 75  |
| 0 | 1 | 0 | 1 | 0 | 0 | 97  | 7.5 | 75  |
| 0 | 1 | 0 | 1 | 0 | 0 | 98  | 7.5 | 75  |
| 0 | 1 | 0 | 1 | 0 | 0 | 99  | 7.5 | 75  |
| 0 | 1 | 0 | 1 | 0 | 0 | 100 | 7.5 | 75  |
| 0 | 1 | 0 | 1 | 0 | 0 | 101 | 7.5 | 75  |
| 0 | 1 | 0 | 1 | 0 | 0 | 102 | 7.5 | 75  |
| 0 | 1 | 0 | 1 | 0 | 0 | 103 | 7.5 | 75  |
| 0 | 1 | 0 | 1 | 0 | 0 | 104 | 7.5 | 75  |
| 0 | 1 | 0 | 1 | 0 | 0 | 105 | 7.5 | 75  |
| 0 | 1 | 0 | 1 | 0 | 0 | 106 | 7.5 | 135 |
| 0 | 1 | 0 | 1 | 0 | 0 | 107 | 7.5 | 135 |

|   |   |   |   |   |   |     |     |     |
|---|---|---|---|---|---|-----|-----|-----|
| 0 | 1 | 0 | 1 | 0 | 0 | 108 | 7.5 | 135 |
| 0 | 1 | 0 | 1 | 0 | 0 | 109 | 7.5 | 135 |
| 0 | 1 | 0 | 1 | 0 | 0 | 110 | 7.5 | 135 |
| 0 | 1 | 0 | 1 | 0 | 0 | 111 | 7.5 | 135 |
| 0 | 1 | 0 | 1 | 0 | 0 | 112 | 7.5 | 135 |
| 0 | 1 | 0 | 1 | 0 | 0 | 113 | 7.5 | 135 |
| 0 | 1 | 0 | 1 | 0 | 0 | 114 | 7.5 | 135 |
| 0 | 1 | 0 | 1 | 0 | 0 | 115 | 7.5 | 135 |
| 0 | 1 | 0 | 1 | 0 | 0 | 116 | 7.5 | 135 |
| 0 | 1 | 0 | 1 | 0 | 0 | 117 | 7.5 | 135 |
| 0 | 1 | 0 | 1 | 0 | 0 | 118 | 7.5 | 135 |
| 0 | 1 | 0 | 1 | 0 | 0 | 119 | 7.5 | 135 |
| 0 | 1 | 0 | 1 | 0 | 0 | 120 | 7.5 | 135 |
| 0 | 1 | 0 | 1 | 0 | 0 | 121 | 7.5 | 135 |
| 0 | 1 | 0 | 1 | 0 | 0 | 122 | 7.5 | 135 |
| 0 | 1 | 0 | 1 | 0 | 0 | 123 | 7.5 | 135 |
| 0 | 1 | 0 | 1 | 0 | 0 | 124 | 7.5 | 135 |
| 0 | 1 | 0 | 1 | 0 | 0 | 125 | 7.5 | 135 |
| 0 | 1 | 0 | 1 | 0 | 0 | 126 | 7.5 | 135 |
| 0 | 1 | 0 | 1 | 0 | 0 | 127 | 7.5 | 135 |
| 0 | 1 | 0 | 1 | 0 | 0 | 128 | 7.5 | 135 |
| 0 | 1 | 0 | 1 | 0 | 0 | 129 | 7.5 | 135 |
| 0 | 1 | 0 | 1 | 0 | 0 | 130 | 7.5 | 135 |
| 0 | 1 | 0 | 1 | 0 | 0 | 131 | 7.5 | 135 |
| 0 | 1 | 0 | 1 | 0 | 0 | 132 | 7.5 | 135 |
| 0 | 1 | 0 | 1 | 0 | 0 | 133 | 7.5 | 135 |
| 0 | 1 | 0 | 1 | 0 | 0 | 134 | 7.5 | 135 |
| 0 | 1 | 0 | 1 | 0 | 0 | 135 | 7.5 | 135 |
| 0 | 1 | 0 | 1 | 0 | 0 | 136 | 7.5 | 135 |
| 0 | 1 | 0 | 1 | 0 | 0 | 137 | 7.5 | 135 |
| 0 | 1 | 0 | 1 | 0 | 0 | 138 | 7.5 | 135 |
| 0 | 1 | 0 | 1 | 0 | 0 | 139 | 7.5 | 135 |
| 0 | 1 | 0 | 1 | 0 | 0 | 140 | 7.5 | 135 |
| 0 | 1 | 0 | 1 | 0 | 0 | 141 | 7.5 | 135 |
| 0 | 1 | 0 | 1 | 0 | 0 | 142 | 7.5 | 135 |
| 0 | 1 | 0 | 1 | 0 | 0 | 143 | 7.5 | 135 |
| 0 | 1 | 0 | 1 | 0 | 0 | 144 | 7.5 | 135 |
| 0 | 1 | 0 | 1 | 0 | 0 | 145 | 7.5 | 135 |
| 0 | 1 | 0 | 1 | 0 | 0 | 146 | 7.5 | 135 |
| 0 | 1 | 0 | 1 | 0 | 0 | 147 | 7.5 | 135 |
| 0 | 1 | 0 | 1 | 0 | 0 | 148 | 7.5 | 135 |
| 0 | 1 | 0 | 1 | 0 | 0 | 149 | 7.5 | 135 |
| 0 | 1 | 0 | 1 | 0 | 0 | 150 | 7.5 | 150 |
| 0 | 1 | 0 | 1 | 0 | 0 | 151 | 7.5 | 165 |
| 0 | 1 | 0 | 1 | 0 | 0 | 152 | 7.5 | 165 |
| 0 | 1 | 0 | 1 | 0 | 0 | 153 | 7.5 | 165 |

|   |   |   |   |   |   |     |     |     |
|---|---|---|---|---|---|-----|-----|-----|
| 0 | 1 | 0 | 1 | 0 | 0 | 154 | 7.5 | 165 |
| 0 | 1 | 0 | 1 | 0 | 0 | 155 | 7.5 | 165 |
| 0 | 1 | 0 | 1 | 0 | 0 | 156 | 7.5 | 165 |
| 0 | 1 | 0 | 1 | 0 | 0 | 157 | 7.5 | 165 |
| 0 | 1 | 0 | 1 | 0 | 0 | 158 | 7.5 | 165 |
| 0 | 1 | 0 | 1 | 0 | 0 | 159 | 7.5 | 165 |
| 0 | 1 | 0 | 1 | 0 | 0 | 160 | 7.5 | 165 |
| 0 | 1 | 0 | 1 | 0 | 0 | 161 | 7.5 | 165 |
| 0 | 1 | 0 | 1 | 0 | 0 | 162 | 7.5 | 165 |
| 0 | 1 | 0 | 1 | 0 | 0 | 163 | 7.5 | 165 |
| 0 | 1 | 0 | 1 | 0 | 0 | 164 | 7.5 | 165 |
| 0 | 1 | 0 | 1 | 0 | 0 | 165 | 7.5 | 165 |
| 0 | 1 | 0 | 1 | 0 | 0 | 166 | 7.5 | 165 |
| 0 | 1 | 0 | 1 | 0 | 0 | 167 | 7.5 | 165 |
| 0 | 1 | 0 | 1 | 0 | 0 | 168 | 7.5 | 165 |
| 0 | 1 | 0 | 1 | 0 | 0 | 169 | 7.5 | 165 |
| 0 | 1 | 0 | 1 | 0 | 0 | 170 | 7.5 | 165 |
| 0 | 1 | 0 | 1 | 0 | 0 | 171 | 7.5 | 165 |
| 0 | 1 | 0 | 1 | 0 | 0 | 172 | 7.5 | 165 |
| 0 | 1 | 0 | 1 | 0 | 0 | 173 | 7.5 | 165 |
| 0 | 1 | 0 | 1 | 0 | 0 | 174 | 7.5 | 165 |
| 0 | 1 | 0 | 1 | 0 | 0 | 175 | 7.5 | 165 |
| 0 | 1 | 0 | 1 | 0 | 0 | 176 | 7.5 | 165 |
| 0 | 1 | 0 | 1 | 0 | 0 | 177 | 7.5 | 165 |
| 0 | 1 | 0 | 1 | 0 | 0 | 178 | 7.5 | 165 |
| 0 | 1 | 0 | 1 | 0 | 0 | 179 | 7.5 | 165 |
| 0 | 1 | 0 | 1 | 0 | 0 | 180 | 7.5 | 180 |
| 0 | 1 | 0 | 0 | 1 | 0 | 0   | 7.5 | 0   |
| 0 | 1 | 0 | 0 | 1 | 0 | 1   | 7.5 | 15  |
| 0 | 1 | 0 | 0 | 1 | 0 | 2   | 7.5 | 15  |
| 0 | 1 | 0 | 0 | 1 | 0 | 3   | 7.5 | 15  |
| 0 | 1 | 0 | 0 | 1 | 0 | 4   | 7.5 | 15  |
| 0 | 1 | 0 | 0 | 1 | 0 | 5   | 7.5 | 15  |
| 0 | 1 | 0 | 0 | 1 | 0 | 6   | 7.5 | 15  |
| 0 | 1 | 0 | 0 | 1 | 0 | 7   | 7.5 | 15  |
| 0 | 1 | 0 | 0 | 1 | 0 | 8   | 7.5 | 15  |
| 0 | 1 | 0 | 0 | 1 | 0 | 9   | 7.5 | 15  |
| 0 | 1 | 0 | 0 | 1 | 0 | 10  | 7.5 | 15  |
| 0 | 1 | 0 | 0 | 1 | 0 | 11  | 7.5 | 15  |
| 0 | 1 | 0 | 0 | 1 | 0 | 12  | 7.5 | 15  |
| 0 | 1 | 0 | 0 | 1 | 0 | 13  | 7.5 | 15  |
| 0 | 1 | 0 | 0 | 1 | 0 | 14  | 7.5 | 15  |
| 0 | 1 | 0 | 0 | 1 | 0 | 15  | 7.5 | 15  |
| 0 | 1 | 0 | 0 | 1 | 0 | 16  | 7.5 | 15  |
| 0 | 1 | 0 | 0 | 1 | 0 | 17  | 7.5 | 15  |
| 0 | 1 | 0 | 0 | 1 | 0 | 18  | 7.5 | 15  |

|   |   |   |   |   |   |    |     |    |
|---|---|---|---|---|---|----|-----|----|
| 0 | 1 | 0 | 0 | 1 | 0 | 19 | 7.5 | 15 |
| 0 | 1 | 0 | 0 | 1 | 0 | 20 | 7.5 | 15 |
| 0 | 1 | 0 | 0 | 1 | 0 | 21 | 7.5 | 15 |
| 0 | 1 | 0 | 0 | 1 | 0 | 22 | 7.5 | 15 |
| 0 | 1 | 0 | 0 | 1 | 0 | 23 | 7.5 | 15 |
| 0 | 1 | 0 | 0 | 1 | 0 | 24 | 7.5 | 15 |
| 0 | 1 | 0 | 0 | 1 | 0 | 25 | 7.5 | 15 |
| 0 | 1 | 0 | 0 | 1 | 0 | 26 | 7.5 | 15 |
| 0 | 1 | 0 | 0 | 1 | 0 | 27 | 7.5 | 15 |
| 0 | 1 | 0 | 0 | 1 | 0 | 28 | 7.5 | 15 |
| 0 | 1 | 0 | 0 | 1 | 0 | 29 | 7.5 | 15 |
| 0 | 1 | 0 | 0 | 1 | 0 | 30 | 7.5 | 15 |
| 0 | 1 | 0 | 0 | 1 | 0 | 31 | 7.5 | 15 |
| 0 | 1 | 0 | 0 | 1 | 0 | 32 | 7.5 | 15 |
| 0 | 1 | 0 | 0 | 1 | 0 | 33 | 7.5 | 15 |
| 0 | 1 | 0 | 0 | 1 | 0 | 34 | 7.5 | 15 |
| 0 | 1 | 0 | 0 | 1 | 0 | 35 | 7.5 | 15 |
| 0 | 1 | 0 | 0 | 1 | 0 | 36 | 7.5 | 15 |
| 0 | 1 | 0 | 0 | 1 | 0 | 37 | 7.5 | 15 |
| 0 | 1 | 0 | 0 | 1 | 0 | 38 | 7.5 | 15 |
| 0 | 1 | 0 | 0 | 1 | 0 | 39 | 7.5 | 15 |
| 0 | 1 | 0 | 0 | 1 | 0 | 40 | 7.5 | 15 |
| 0 | 1 | 0 | 0 | 1 | 0 | 41 | 7.5 | 15 |
| 0 | 1 | 0 | 0 | 1 | 0 | 42 | 7.5 | 15 |
| 0 | 1 | 0 | 0 | 1 | 0 | 43 | 7.5 | 15 |
| 0 | 1 | 0 | 0 | 1 | 0 | 44 | 7.5 | 15 |
| 0 | 1 | 0 | 0 | 1 | 0 | 45 | 7.5 | 15 |
| 0 | 1 | 0 | 0 | 1 | 0 | 46 | 7.5 | 75 |
| 0 | 1 | 0 | 0 | 1 | 0 | 47 | 7.5 | 75 |
| 0 | 1 | 0 | 0 | 1 | 0 | 48 | 7.5 | 75 |
| 0 | 1 | 0 | 0 | 1 | 0 | 49 | 7.5 | 75 |
| 0 | 1 | 0 | 0 | 1 | 0 | 50 | 7.5 | 75 |
| 0 | 1 | 0 | 0 | 1 | 0 | 51 | 7.5 | 75 |
| 0 | 1 | 0 | 0 | 1 | 0 | 52 | 7.5 | 75 |
| 0 | 1 | 0 | 0 | 1 | 0 | 53 | 7.5 | 75 |
| 0 | 1 | 0 | 0 | 1 | 0 | 54 | 7.5 | 75 |
| 0 | 1 | 0 | 0 | 1 | 0 | 55 | 7.5 | 75 |
| 0 | 1 | 0 | 0 | 1 | 0 | 56 | 7.5 | 75 |
| 0 | 1 | 0 | 0 | 1 | 0 | 57 | 7.5 | 75 |
| 0 | 1 | 0 | 0 | 1 | 0 | 58 | 7.5 | 75 |
| 0 | 1 | 0 | 0 | 1 | 0 | 59 | 7.5 | 75 |
| 0 | 1 | 0 | 0 | 1 | 0 | 60 | 7.5 | 75 |
| 0 | 1 | 0 | 0 | 1 | 0 | 61 | 7.5 | 75 |
| 0 | 1 | 0 | 0 | 1 | 0 | 62 | 7.5 | 75 |
| 0 | 1 | 0 | 0 | 1 | 0 | 63 | 7.5 | 75 |
| 0 | 1 | 0 | 0 | 1 | 0 | 64 | 7.5 | 75 |

|   |   |   |   |   |   |     |     |     |
|---|---|---|---|---|---|-----|-----|-----|
| 0 | 1 | 0 | 0 | 1 | 0 | 65  | 7.5 | 75  |
| 0 | 1 | 0 | 0 | 1 | 0 | 66  | 7.5 | 75  |
| 0 | 1 | 0 | 0 | 1 | 0 | 67  | 7.5 | 75  |
| 0 | 1 | 0 | 0 | 1 | 0 | 68  | 7.5 | 75  |
| 0 | 1 | 0 | 0 | 1 | 0 | 69  | 7.5 | 75  |
| 0 | 1 | 0 | 0 | 1 | 0 | 70  | 7.5 | 75  |
| 0 | 1 | 0 | 0 | 1 | 0 | 71  | 7.5 | 75  |
| 0 | 1 | 0 | 0 | 1 | 0 | 72  | 7.5 | 75  |
| 0 | 1 | 0 | 0 | 1 | 0 | 73  | 7.5 | 75  |
| 0 | 1 | 0 | 0 | 1 | 0 | 74  | 7.5 | 75  |
| 0 | 1 | 0 | 0 | 1 | 0 | 75  | 7.5 | 75  |
| 0 | 1 | 0 | 0 | 1 | 0 | 76  | 7.5 | 75  |
| 0 | 1 | 0 | 0 | 1 | 0 | 77  | 7.5 | 75  |
| 0 | 1 | 0 | 0 | 1 | 0 | 78  | 7.5 | 75  |
| 0 | 1 | 0 | 0 | 1 | 0 | 79  | 7.5 | 75  |
| 0 | 1 | 0 | 0 | 1 | 0 | 80  | 7.5 | 75  |
| 0 | 1 | 0 | 0 | 1 | 0 | 81  | 7.5 | 75  |
| 0 | 1 | 0 | 0 | 1 | 0 | 82  | 7.5 | 75  |
| 0 | 1 | 0 | 0 | 1 | 0 | 83  | 7.5 | 75  |
| 0 | 1 | 0 | 0 | 1 | 0 | 84  | 7.5 | 75  |
| 0 | 1 | 0 | 0 | 1 | 0 | 85  | 7.5 | 75  |
| 0 | 1 | 0 | 0 | 1 | 0 | 86  | 7.5 | 75  |
| 0 | 1 | 0 | 0 | 1 | 0 | 87  | 7.5 | 75  |
| 0 | 1 | 0 | 0 | 1 | 0 | 88  | 7.5 | 75  |
| 0 | 1 | 0 | 0 | 1 | 0 | 89  | 7.5 | 75  |
| 0 | 1 | 0 | 0 | 1 | 0 | 90  | 7.5 | 90  |
| 0 | 1 | 0 | 0 | 1 | 0 | 91  | 7.5 | 105 |
| 0 | 1 | 0 | 0 | 1 | 0 | 92  | 7.5 | 105 |
| 0 | 1 | 0 | 0 | 1 | 0 | 93  | 7.5 | 105 |
| 0 | 1 | 0 | 0 | 1 | 0 | 94  | 7.5 | 105 |
| 0 | 1 | 0 | 0 | 1 | 0 | 95  | 7.5 | 105 |
| 0 | 1 | 0 | 0 | 1 | 0 | 96  | 7.5 | 105 |
| 0 | 1 | 0 | 0 | 1 | 0 | 97  | 7.5 | 105 |
| 0 | 1 | 0 | 0 | 1 | 0 | 98  | 7.5 | 105 |
| 0 | 1 | 0 | 0 | 1 | 0 | 99  | 7.5 | 105 |
| 0 | 1 | 0 | 0 | 1 | 0 | 100 | 7.5 | 105 |
| 0 | 1 | 0 | 0 | 1 | 0 | 101 | 7.5 | 105 |
| 0 | 1 | 0 | 0 | 1 | 0 | 102 | 7.5 | 105 |
| 0 | 1 | 0 | 0 | 1 | 0 | 103 | 7.5 | 105 |
| 0 | 1 | 0 | 0 | 1 | 0 | 104 | 7.5 | 105 |
| 0 | 1 | 0 | 0 | 1 | 0 | 105 | 7.5 | 105 |
| 0 | 1 | 0 | 0 | 1 | 0 | 106 | 7.5 | 105 |
| 0 | 1 | 0 | 0 | 1 | 0 | 107 | 7.5 | 105 |
| 0 | 1 | 0 | 0 | 1 | 0 | 108 | 7.5 | 105 |
| 0 | 1 | 0 | 0 | 1 | 0 | 109 | 7.5 | 105 |
| 0 | 1 | 0 | 0 | 1 | 0 | 110 | 7.5 | 105 |

|   |   |   |   |   |   |     |     |     |
|---|---|---|---|---|---|-----|-----|-----|
| 0 | 1 | 0 | 0 | 1 | 0 | 111 | 7.5 | 105 |
| 0 | 1 | 0 | 0 | 1 | 0 | 112 | 7.5 | 105 |
| 0 | 1 | 0 | 0 | 1 | 0 | 113 | 7.5 | 105 |
| 0 | 1 | 0 | 0 | 1 | 0 | 114 | 7.5 | 105 |
| 0 | 1 | 0 | 0 | 1 | 0 | 115 | 7.5 | 105 |
| 0 | 1 | 0 | 0 | 1 | 0 | 116 | 7.5 | 105 |
| 0 | 1 | 0 | 0 | 1 | 0 | 117 | 7.5 | 105 |
| 0 | 1 | 0 | 0 | 1 | 0 | 118 | 7.5 | 105 |
| 0 | 1 | 0 | 0 | 1 | 0 | 119 | 7.5 | 105 |
| 0 | 1 | 0 | 0 | 1 | 0 | 120 | 7.5 | 105 |
| 0 | 1 | 0 | 0 | 1 | 0 | 121 | 7.5 | 105 |
| 0 | 1 | 0 | 0 | 1 | 0 | 122 | 7.5 | 105 |
| 0 | 1 | 0 | 0 | 1 | 0 | 123 | 7.5 | 105 |
| 0 | 1 | 0 | 0 | 1 | 0 | 124 | 7.5 | 105 |
| 0 | 1 | 0 | 0 | 1 | 0 | 125 | 7.5 | 105 |
| 0 | 1 | 0 | 0 | 1 | 0 | 126 | 7.5 | 105 |
| 0 | 1 | 0 | 0 | 1 | 0 | 127 | 7.5 | 105 |
| 0 | 1 | 0 | 0 | 1 | 0 | 128 | 7.5 | 105 |
| 0 | 1 | 0 | 0 | 1 | 0 | 129 | 7.5 | 105 |
| 0 | 1 | 0 | 0 | 1 | 0 | 130 | 7.5 | 105 |
| 0 | 1 | 0 | 0 | 1 | 0 | 131 | 7.5 | 105 |
| 0 | 1 | 0 | 0 | 1 | 0 | 132 | 7.5 | 105 |
| 0 | 1 | 0 | 0 | 1 | 0 | 133 | 7.5 | 105 |
| 0 | 1 | 0 | 0 | 1 | 0 | 134 | 7.5 | 105 |
| 0 | 1 | 0 | 0 | 1 | 0 | 135 | 7.5 | 105 |
| 0 | 1 | 0 | 0 | 1 | 0 | 136 | 7.5 | 165 |
| 0 | 1 | 0 | 0 | 1 | 0 | 137 | 7.5 | 165 |
| 0 | 1 | 0 | 0 | 1 | 0 | 138 | 7.5 | 165 |
| 0 | 1 | 0 | 0 | 1 | 0 | 139 | 7.5 | 165 |
| 0 | 1 | 0 | 0 | 1 | 0 | 140 | 7.5 | 165 |
| 0 | 1 | 0 | 0 | 1 | 0 | 141 | 7.5 | 165 |
| 0 | 1 | 0 | 0 | 1 | 0 | 142 | 7.5 | 165 |
| 0 | 1 | 0 | 0 | 1 | 0 | 143 | 7.5 | 165 |
| 0 | 1 | 0 | 0 | 1 | 0 | 144 | 7.5 | 165 |
| 0 | 1 | 0 | 0 | 1 | 0 | 145 | 7.5 | 165 |
| 0 | 1 | 0 | 0 | 1 | 0 | 146 | 7.5 | 165 |
| 0 | 1 | 0 | 0 | 1 | 0 | 147 | 7.5 | 165 |
| 0 | 1 | 0 | 0 | 1 | 0 | 148 | 7.5 | 165 |
| 0 | 1 | 0 | 0 | 1 | 0 | 149 | 7.5 | 165 |
| 0 | 1 | 0 | 0 | 1 | 0 | 150 | 7.5 | 165 |
| 0 | 1 | 0 | 0 | 1 | 0 | 151 | 7.5 | 165 |
| 0 | 1 | 0 | 0 | 1 | 0 | 152 | 7.5 | 165 |
| 0 | 1 | 0 | 0 | 1 | 0 | 153 | 7.5 | 165 |
| 0 | 1 | 0 | 0 | 1 | 0 | 154 | 7.5 | 165 |
| 0 | 1 | 0 | 0 | 1 | 0 | 155 | 7.5 | 165 |
| 0 | 1 | 0 | 0 | 1 | 0 | 156 | 7.5 | 165 |

|   |   |   |   |   |   |     |     |     |
|---|---|---|---|---|---|-----|-----|-----|
| 0 | 1 | 0 | 0 | 1 | 0 | 157 | 7.5 | 165 |
| 0 | 1 | 0 | 0 | 1 | 0 | 158 | 7.5 | 165 |
| 0 | 1 | 0 | 0 | 1 | 0 | 159 | 7.5 | 165 |
| 0 | 1 | 0 | 0 | 1 | 0 | 160 | 7.5 | 165 |
| 0 | 1 | 0 | 0 | 1 | 0 | 161 | 7.5 | 165 |
| 0 | 1 | 0 | 0 | 1 | 0 | 162 | 7.5 | 165 |
| 0 | 1 | 0 | 0 | 1 | 0 | 163 | 7.5 | 165 |
| 0 | 1 | 0 | 0 | 1 | 0 | 164 | 7.5 | 165 |
| 0 | 1 | 0 | 0 | 1 | 0 | 165 | 7.5 | 165 |
| 0 | 1 | 0 | 0 | 1 | 0 | 166 | 7.5 | 165 |
| 0 | 1 | 0 | 0 | 1 | 0 | 167 | 7.5 | 165 |
| 0 | 1 | 0 | 0 | 1 | 0 | 168 | 7.5 | 165 |
| 0 | 1 | 0 | 0 | 1 | 0 | 169 | 7.5 | 165 |
| 0 | 1 | 0 | 0 | 1 | 0 | 170 | 7.5 | 165 |
| 0 | 1 | 0 | 0 | 1 | 0 | 171 | 7.5 | 165 |
| 0 | 1 | 0 | 0 | 1 | 0 | 172 | 7.5 | 165 |
| 0 | 1 | 0 | 0 | 1 | 0 | 173 | 7.5 | 165 |
| 0 | 1 | 0 | 0 | 1 | 0 | 174 | 7.5 | 165 |
| 0 | 1 | 0 | 0 | 1 | 0 | 175 | 7.5 | 165 |
| 0 | 1 | 0 | 0 | 1 | 0 | 176 | 7.5 | 165 |
| 0 | 1 | 0 | 0 | 1 | 0 | 177 | 7.5 | 165 |
| 0 | 1 | 0 | 0 | 1 | 0 | 178 | 7.5 | 165 |
| 0 | 1 | 0 | 0 | 1 | 0 | 179 | 7.5 | 165 |
| 0 | 1 | 0 | 0 | 1 | 0 | 180 | 7.5 | 180 |
| 0 | 1 | 0 | 0 | 0 | 1 | 0   | 7.5 | 0   |
| 0 | 1 | 0 | 0 | 0 | 1 | 1   | 7.5 | 15  |
| 0 | 1 | 0 | 0 | 0 | 1 | 2   | 7.5 | 15  |
| 0 | 1 | 0 | 0 | 0 | 1 | 3   | 7.5 | 15  |
| 0 | 1 | 0 | 0 | 0 | 1 | 4   | 7.5 | 15  |
| 0 | 1 | 0 | 0 | 0 | 1 | 5   | 7.5 | 15  |
| 0 | 1 | 0 | 0 | 0 | 1 | 6   | 7.5 | 15  |
| 0 | 1 | 0 | 0 | 0 | 1 | 7   | 7.5 | 15  |
| 0 | 1 | 0 | 0 | 0 | 1 | 8   | 7.5 | 15  |
| 0 | 1 | 0 | 0 | 0 | 1 | 9   | 7.5 | 15  |
| 0 | 1 | 0 | 0 | 0 | 1 | 10  | 7.5 | 15  |
| 0 | 1 | 0 | 0 | 0 | 1 | 11  | 7.5 | 15  |
| 0 | 1 | 0 | 0 | 0 | 1 | 12  | 7.5 | 15  |
| 0 | 1 | 0 | 0 | 0 | 1 | 13  | 7.5 | 15  |
| 0 | 1 | 0 | 0 | 0 | 1 | 14  | 7.5 | 15  |
| 0 | 1 | 0 | 0 | 0 | 1 | 15  | 7.5 | 15  |
| 0 | 1 | 0 | 0 | 0 | 1 | 16  | 7.5 | 15  |
| 0 | 1 | 0 | 0 | 0 | 1 | 17  | 7.5 | 15  |
| 0 | 1 | 0 | 0 | 0 | 1 | 18  | 7.5 | 15  |
| 0 | 1 | 0 | 0 | 0 | 1 | 19  | 7.5 | 15  |
| 0 | 1 | 0 | 0 | 0 | 1 | 20  | 7.5 | 15  |
| 0 | 1 | 0 | 0 | 0 | 1 | 21  | 7.5 | 15  |

|   |   |   |   |   |   |    |     |    |
|---|---|---|---|---|---|----|-----|----|
| 0 | 1 | 0 | 0 | 0 | 1 | 22 | 7.5 | 15 |
| 0 | 1 | 0 | 0 | 0 | 1 | 23 | 7.5 | 15 |
| 0 | 1 | 0 | 0 | 0 | 1 | 24 | 7.5 | 15 |
| 0 | 1 | 0 | 0 | 0 | 1 | 25 | 7.5 | 15 |
| 0 | 1 | 0 | 0 | 0 | 1 | 26 | 7.5 | 15 |
| 0 | 1 | 0 | 0 | 0 | 1 | 27 | 7.5 | 15 |
| 0 | 1 | 0 | 0 | 0 | 1 | 28 | 7.5 | 15 |
| 0 | 1 | 0 | 0 | 0 | 1 | 29 | 7.5 | 15 |
| 0 | 1 | 0 | 0 | 0 | 1 | 30 | 7.5 | 15 |
| 0 | 1 | 0 | 0 | 0 | 1 | 31 | 7.5 | 15 |
| 0 | 1 | 0 | 0 | 0 | 1 | 32 | 7.5 | 15 |
| 0 | 1 | 0 | 0 | 0 | 1 | 33 | 7.5 | 15 |
| 0 | 1 | 0 | 0 | 0 | 1 | 34 | 7.5 | 15 |
| 0 | 1 | 0 | 0 | 0 | 1 | 35 | 7.5 | 15 |
| 0 | 1 | 0 | 0 | 0 | 1 | 36 | 7.5 | 15 |
| 0 | 1 | 0 | 0 | 0 | 1 | 37 | 7.5 | 15 |
| 0 | 1 | 0 | 0 | 0 | 1 | 38 | 7.5 | 15 |
| 0 | 1 | 0 | 0 | 0 | 1 | 39 | 7.5 | 15 |
| 0 | 1 | 0 | 0 | 0 | 1 | 40 | 7.5 | 15 |
| 0 | 1 | 0 | 0 | 0 | 1 | 41 | 7.5 | 15 |
| 0 | 1 | 0 | 0 | 0 | 1 | 42 | 7.5 | 15 |
| 0 | 1 | 0 | 0 | 0 | 1 | 43 | 7.5 | 15 |
| 0 | 1 | 0 | 0 | 0 | 1 | 44 | 7.5 | 15 |
| 0 | 1 | 0 | 0 | 0 | 1 | 45 | 7.5 | 15 |
| 0 | 1 | 0 | 0 | 0 | 1 | 46 | 7.5 | 75 |
| 0 | 1 | 0 | 0 | 0 | 1 | 47 | 7.5 | 75 |
| 0 | 1 | 0 | 0 | 0 | 1 | 48 | 7.5 | 75 |
| 0 | 1 | 0 | 0 | 0 | 1 | 49 | 7.5 | 75 |
| 0 | 1 | 0 | 0 | 0 | 1 | 50 | 7.5 | 75 |
| 0 | 1 | 0 | 0 | 0 | 1 | 51 | 7.5 | 75 |
| 0 | 1 | 0 | 0 | 0 | 1 | 52 | 7.5 | 75 |
| 0 | 1 | 0 | 0 | 0 | 1 | 53 | 7.5 | 75 |
| 0 | 1 | 0 | 0 | 0 | 1 | 54 | 7.5 | 75 |
| 0 | 1 | 0 | 0 | 0 | 1 | 55 | 7.5 | 75 |
| 0 | 1 | 0 | 0 | 0 | 1 | 56 | 7.5 | 75 |
| 0 | 1 | 0 | 0 | 0 | 1 | 57 | 7.5 | 75 |
| 0 | 1 | 0 | 0 | 0 | 1 | 58 | 7.5 | 75 |
| 0 | 1 | 0 | 0 | 0 | 1 | 59 | 7.5 | 75 |
| 0 | 1 | 0 | 0 | 0 | 1 | 60 | 7.5 | 75 |
| 0 | 1 | 0 | 0 | 0 | 1 | 61 | 7.5 | 75 |
| 0 | 1 | 0 | 0 | 0 | 1 | 62 | 7.5 | 75 |
| 0 | 1 | 0 | 0 | 0 | 1 | 63 | 7.5 | 75 |
| 0 | 1 | 0 | 0 | 0 | 1 | 64 | 7.5 | 75 |
| 0 | 1 | 0 | 0 | 0 | 1 | 65 | 7.5 | 75 |
| 0 | 1 | 0 | 0 | 0 | 1 | 66 | 7.5 | 75 |
| 0 | 1 | 0 | 0 | 0 | 1 | 67 | 7.5 | 75 |

|   |   |   |   |   |   |     |     |     |
|---|---|---|---|---|---|-----|-----|-----|
| 0 | 1 | 0 | 0 | 0 | 1 | 68  | 7.5 | 75  |
| 0 | 1 | 0 | 0 | 0 | 1 | 69  | 7.5 | 75  |
| 0 | 1 | 0 | 0 | 0 | 1 | 70  | 7.5 | 75  |
| 0 | 1 | 0 | 0 | 0 | 1 | 71  | 7.5 | 75  |
| 0 | 1 | 0 | 0 | 0 | 1 | 72  | 7.5 | 75  |
| 0 | 1 | 0 | 0 | 0 | 1 | 73  | 7.5 | 75  |
| 0 | 1 | 0 | 0 | 0 | 1 | 74  | 7.5 | 75  |
| 0 | 1 | 0 | 0 | 0 | 1 | 75  | 7.5 | 75  |
| 0 | 1 | 0 | 0 | 0 | 1 | 76  | 7.5 | 75  |
| 0 | 1 | 0 | 0 | 0 | 1 | 77  | 7.5 | 75  |
| 0 | 1 | 0 | 0 | 0 | 1 | 78  | 7.5 | 75  |
| 0 | 1 | 0 | 0 | 0 | 1 | 79  | 7.5 | 75  |
| 0 | 1 | 0 | 0 | 0 | 1 | 80  | 7.5 | 75  |
| 0 | 1 | 0 | 0 | 0 | 1 | 81  | 7.5 | 75  |
| 0 | 1 | 0 | 0 | 0 | 1 | 82  | 7.5 | 75  |
| 0 | 1 | 0 | 0 | 0 | 1 | 83  | 7.5 | 75  |
| 0 | 1 | 0 | 0 | 0 | 1 | 84  | 7.5 | 75  |
| 0 | 1 | 0 | 0 | 0 | 1 | 85  | 7.5 | 75  |
| 0 | 1 | 0 | 0 | 0 | 1 | 86  | 7.5 | 75  |
| 0 | 1 | 0 | 0 | 0 | 1 | 87  | 7.5 | 75  |
| 0 | 1 | 0 | 0 | 0 | 1 | 88  | 7.5 | 75  |
| 0 | 1 | 0 | 0 | 0 | 1 | 89  | 7.5 | 75  |
| 0 | 1 | 0 | 0 | 0 | 1 | 90  | 7.5 | 90  |
| 0 | 1 | 0 | 0 | 0 | 1 | 91  | 7.5 | 105 |
| 0 | 1 | 0 | 0 | 0 | 1 | 92  | 7.5 | 105 |
| 0 | 1 | 0 | 0 | 0 | 1 | 93  | 7.5 | 105 |
| 0 | 1 | 0 | 0 | 0 | 1 | 94  | 7.5 | 105 |
| 0 | 1 | 0 | 0 | 0 | 1 | 95  | 7.5 | 105 |
| 0 | 1 | 0 | 0 | 0 | 1 | 96  | 7.5 | 105 |
| 0 | 1 | 0 | 0 | 0 | 1 | 97  | 7.5 | 105 |
| 0 | 1 | 0 | 0 | 0 | 1 | 98  | 7.5 | 105 |
| 0 | 1 | 0 | 0 | 0 | 1 | 99  | 7.5 | 105 |
| 0 | 1 | 0 | 0 | 0 | 1 | 100 | 7.5 | 105 |
| 0 | 1 | 0 | 0 | 0 | 1 | 101 | 7.5 | 105 |
| 0 | 1 | 0 | 0 | 0 | 1 | 102 | 7.5 | 105 |
| 0 | 1 | 0 | 0 | 0 | 1 | 103 | 7.5 | 105 |
| 0 | 1 | 0 | 0 | 0 | 1 | 104 | 7.5 | 105 |
| 0 | 1 | 0 | 0 | 0 | 1 | 105 | 7.5 | 105 |
| 0 | 1 | 0 | 0 | 0 | 1 | 106 | 7.5 | 105 |
| 0 | 1 | 0 | 0 | 0 | 1 | 107 | 7.5 | 105 |
| 0 | 1 | 0 | 0 | 0 | 1 | 108 | 7.5 | 105 |
| 0 | 1 | 0 | 0 | 0 | 1 | 109 | 7.5 | 105 |
| 0 | 1 | 0 | 0 | 0 | 1 | 110 | 7.5 | 105 |
| 0 | 1 | 0 | 0 | 0 | 1 | 111 | 7.5 | 105 |
| 0 | 1 | 0 | 0 | 0 | 1 | 112 | 7.5 | 105 |
| 0 | 1 | 0 | 0 | 0 | 1 | 113 | 7.5 | 105 |

|   |   |   |   |   |   |     |     |     |
|---|---|---|---|---|---|-----|-----|-----|
| 0 | 1 | 0 | 0 | 0 | 1 | 114 | 7.5 | 105 |
| 0 | 1 | 0 | 0 | 0 | 1 | 115 | 7.5 | 105 |
| 0 | 1 | 0 | 0 | 0 | 1 | 116 | 7.5 | 105 |
| 0 | 1 | 0 | 0 | 0 | 1 | 117 | 7.5 | 105 |
| 0 | 1 | 0 | 0 | 0 | 1 | 118 | 7.5 | 105 |
| 0 | 1 | 0 | 0 | 0 | 1 | 119 | 7.5 | 105 |
| 0 | 1 | 0 | 0 | 0 | 1 | 120 | 7.5 | 120 |
| 0 | 1 | 0 | 0 | 0 | 1 | 121 | 7.5 | 135 |
| 0 | 1 | 0 | 0 | 0 | 1 | 122 | 7.5 | 135 |
| 0 | 1 | 0 | 0 | 0 | 1 | 123 | 7.5 | 135 |
| 0 | 1 | 0 | 0 | 0 | 1 | 124 | 7.5 | 135 |
| 0 | 1 | 0 | 0 | 0 | 1 | 125 | 7.5 | 135 |
| 0 | 1 | 0 | 0 | 0 | 1 | 126 | 7.5 | 135 |
| 0 | 1 | 0 | 0 | 0 | 1 | 127 | 7.5 | 135 |
| 0 | 1 | 0 | 0 | 0 | 1 | 128 | 7.5 | 135 |
| 0 | 1 | 0 | 0 | 0 | 1 | 129 | 7.5 | 135 |
| 0 | 1 | 0 | 0 | 0 | 1 | 130 | 7.5 | 135 |
| 0 | 1 | 0 | 0 | 0 | 1 | 131 | 7.5 | 135 |
| 0 | 1 | 0 | 0 | 0 | 1 | 132 | 7.5 | 135 |
| 0 | 1 | 0 | 0 | 0 | 1 | 133 | 7.5 | 135 |
| 0 | 1 | 0 | 0 | 0 | 1 | 134 | 7.5 | 135 |
| 0 | 1 | 0 | 0 | 0 | 1 | 135 | 7.5 | 135 |
| 0 | 1 | 0 | 0 | 0 | 1 | 136 | 7.5 | 135 |
| 0 | 1 | 0 | 0 | 0 | 1 | 137 | 7.5 | 135 |
| 0 | 1 | 0 | 0 | 0 | 1 | 138 | 7.5 | 135 |
| 0 | 1 | 0 | 0 | 0 | 1 | 139 | 7.5 | 135 |
| 0 | 1 | 0 | 0 | 0 | 1 | 140 | 7.5 | 135 |
| 0 | 1 | 0 | 0 | 0 | 1 | 141 | 7.5 | 135 |
| 0 | 1 | 0 | 0 | 0 | 1 | 142 | 7.5 | 135 |
| 0 | 1 | 0 | 0 | 0 | 1 | 143 | 7.5 | 135 |
| 0 | 1 | 0 | 0 | 0 | 1 | 144 | 7.5 | 135 |
| 0 | 1 | 0 | 0 | 0 | 1 | 145 | 7.5 | 135 |
| 0 | 1 | 0 | 0 | 0 | 1 | 146 | 7.5 | 135 |
| 0 | 1 | 0 | 0 | 0 | 1 | 147 | 7.5 | 135 |
| 0 | 1 | 0 | 0 | 0 | 1 | 148 | 7.5 | 135 |
| 0 | 1 | 0 | 0 | 0 | 1 | 149 | 7.5 | 135 |
| 0 | 1 | 0 | 0 | 0 | 1 | 150 | 7.5 | 135 |
| 0 | 1 | 0 | 0 | 0 | 1 | 151 | 7.5 | 135 |
| 0 | 1 | 0 | 0 | 0 | 1 | 152 | 7.5 | 135 |
| 0 | 1 | 0 | 0 | 0 | 1 | 153 | 7.5 | 135 |
| 0 | 1 | 0 | 0 | 0 | 1 | 154 | 7.5 | 135 |
| 0 | 1 | 0 | 0 | 0 | 1 | 155 | 7.5 | 135 |
| 0 | 1 | 0 | 0 | 0 | 1 | 156 | 7.5 | 135 |
| 0 | 1 | 0 | 0 | 0 | 1 | 157 | 7.5 | 135 |
| 0 | 1 | 0 | 0 | 0 | 1 | 158 | 7.5 | 135 |
| 0 | 1 | 0 | 0 | 0 | 1 | 159 | 7.5 | 135 |

|   |   |   |   |   |   |     |     |     |
|---|---|---|---|---|---|-----|-----|-----|
| 0 | 1 | 0 | 0 | 0 | 1 | 160 | 7.5 | 135 |
| 0 | 1 | 0 | 0 | 0 | 1 | 161 | 7.5 | 135 |
| 0 | 1 | 0 | 0 | 0 | 1 | 162 | 7.5 | 135 |
| 0 | 1 | 0 | 0 | 0 | 1 | 163 | 7.5 | 135 |
| 0 | 1 | 0 | 0 | 0 | 1 | 164 | 7.5 | 135 |
| 0 | 1 | 0 | 0 | 0 | 1 | 165 | 7.5 | 135 |
| 0 | 1 | 0 | 0 | 0 | 1 | 166 | 7.5 | 135 |
| 0 | 1 | 0 | 0 | 0 | 1 | 167 | 7.5 | 135 |
| 0 | 1 | 0 | 0 | 0 | 1 | 168 | 7.5 | 135 |
| 0 | 1 | 0 | 0 | 0 | 1 | 169 | 7.5 | 135 |
| 0 | 1 | 0 | 0 | 0 | 1 | 170 | 7.5 | 135 |
| 0 | 1 | 0 | 0 | 0 | 1 | 171 | 7.5 | 135 |
| 0 | 1 | 0 | 0 | 0 | 1 | 172 | 7.5 | 135 |
| 0 | 1 | 0 | 0 | 0 | 1 | 173 | 7.5 | 135 |
| 0 | 1 | 0 | 0 | 0 | 1 | 174 | 7.5 | 135 |
| 0 | 1 | 0 | 0 | 0 | 1 | 175 | 7.5 | 135 |
| 0 | 1 | 0 | 0 | 0 | 1 | 176 | 7.5 | 135 |
| 0 | 1 | 0 | 0 | 0 | 1 | 177 | 7.5 | 135 |
| 0 | 1 | 0 | 0 | 0 | 1 | 178 | 7.5 | 135 |
| 0 | 1 | 0 | 0 | 0 | 1 | 179 | 7.5 | 135 |
| 0 | 1 | 0 | 0 | 0 | 1 | 180 | 7.5 | 135 |
| 0 | 0 | 1 | 1 | 0 | 0 | 0   | 7.5 | 0   |
| 0 | 0 | 1 | 1 | 0 | 0 | 1   | 7.5 | 15  |
| 0 | 0 | 1 | 1 | 0 | 0 | 2   | 7.5 | 15  |
| 0 | 0 | 1 | 1 | 0 | 0 | 3   | 7.5 | 15  |
| 0 | 0 | 1 | 1 | 0 | 0 | 4   | 7.5 | 15  |
| 0 | 0 | 1 | 1 | 0 | 0 | 5   | 7.5 | 15  |
| 0 | 0 | 1 | 1 | 0 | 0 | 6   | 7.5 | 15  |
| 0 | 0 | 1 | 1 | 0 | 0 | 7   | 7.5 | 15  |
| 0 | 0 | 1 | 1 | 0 | 0 | 8   | 7.5 | 15  |
| 0 | 0 | 1 | 1 | 0 | 0 | 9   | 7.5 | 15  |
| 0 | 0 | 1 | 1 | 0 | 0 | 10  | 7.5 | 15  |
| 0 | 0 | 1 | 1 | 0 | 0 | 11  | 7.5 | 15  |
| 0 | 0 | 1 | 1 | 0 | 0 | 12  | 7.5 | 15  |
| 0 | 0 | 1 | 1 | 0 | 0 | 13  | 7.5 | 15  |
| 0 | 0 | 1 | 1 | 0 | 0 | 14  | 7.5 | 15  |
| 0 | 0 | 1 | 1 | 0 | 0 | 15  | 7.5 | 15  |
| 0 | 0 | 1 | 1 | 0 | 0 | 16  | 7.5 | 15  |
| 0 | 0 | 1 | 1 | 0 | 0 | 17  | 7.5 | 15  |
| 0 | 0 | 1 | 1 | 0 | 0 | 18  | 7.5 | 15  |
| 0 | 0 | 1 | 1 | 0 | 0 | 19  | 7.5 | 15  |
| 0 | 0 | 1 | 1 | 0 | 0 | 20  | 7.5 | 15  |
| 0 | 0 | 1 | 1 | 0 | 0 | 21  | 7.5 | 15  |
| 0 | 0 | 1 | 1 | 0 | 0 | 22  | 7.5 | 15  |
| 0 | 0 | 1 | 1 | 0 | 0 | 23  | 7.5 | 15  |
| 0 | 0 | 1 | 1 | 0 | 0 | 24  | 7.5 | 15  |

|   |   |   |   |   |   |    |     |    |
|---|---|---|---|---|---|----|-----|----|
| 0 | 0 | 1 | 1 | 0 | 0 | 25 | 7.5 | 15 |
| 0 | 0 | 1 | 1 | 0 | 0 | 26 | 7.5 | 15 |
| 0 | 0 | 1 | 1 | 0 | 0 | 27 | 7.5 | 15 |
| 0 | 0 | 1 | 1 | 0 | 0 | 28 | 7.5 | 15 |
| 0 | 0 | 1 | 1 | 0 | 0 | 29 | 7.5 | 15 |
| 0 | 0 | 1 | 1 | 0 | 0 | 30 | 7.5 | 30 |
| 0 | 0 | 1 | 1 | 0 | 0 | 31 | 7.5 | 45 |
| 0 | 0 | 1 | 1 | 0 | 0 | 32 | 7.5 | 45 |
| 0 | 0 | 1 | 1 | 0 | 0 | 33 | 7.5 | 45 |
| 0 | 0 | 1 | 1 | 0 | 0 | 34 | 7.5 | 45 |
| 0 | 0 | 1 | 1 | 0 | 0 | 35 | 7.5 | 45 |
| 0 | 0 | 1 | 1 | 0 | 0 | 36 | 7.5 | 45 |
| 0 | 0 | 1 | 1 | 0 | 0 | 37 | 7.5 | 45 |
| 0 | 0 | 1 | 1 | 0 | 0 | 38 | 7.5 | 45 |
| 0 | 0 | 1 | 1 | 0 | 0 | 39 | 7.5 | 45 |
| 0 | 0 | 1 | 1 | 0 | 0 | 40 | 7.5 | 45 |
| 0 | 0 | 1 | 1 | 0 | 0 | 41 | 7.5 | 45 |
| 0 | 0 | 1 | 1 | 0 | 0 | 42 | 7.5 | 45 |
| 0 | 0 | 1 | 1 | 0 | 0 | 43 | 7.5 | 45 |
| 0 | 0 | 1 | 1 | 0 | 0 | 44 | 7.5 | 45 |
| 0 | 0 | 1 | 1 | 0 | 0 | 45 | 7.5 | 45 |
| 0 | 0 | 1 | 1 | 0 | 0 | 46 | 7.5 | 45 |
| 0 | 0 | 1 | 1 | 0 | 0 | 47 | 7.5 | 45 |
| 0 | 0 | 1 | 1 | 0 | 0 | 48 | 7.5 | 45 |
| 0 | 0 | 1 | 1 | 0 | 0 | 49 | 7.5 | 45 |
| 0 | 0 | 1 | 1 | 0 | 0 | 50 | 7.5 | 45 |
| 0 | 0 | 1 | 1 | 0 | 0 | 51 | 7.5 | 45 |
| 0 | 0 | 1 | 1 | 0 | 0 | 52 | 7.5 | 45 |
| 0 | 0 | 1 | 1 | 0 | 0 | 53 | 7.5 | 45 |
| 0 | 0 | 1 | 1 | 0 | 0 | 54 | 7.5 | 45 |
| 0 | 0 | 1 | 1 | 0 | 0 | 55 | 7.5 | 45 |
| 0 | 0 | 1 | 1 | 0 | 0 | 56 | 7.5 | 45 |
| 0 | 0 | 1 | 1 | 0 | 0 | 57 | 7.5 | 45 |
| 0 | 0 | 1 | 1 | 0 | 0 | 58 | 7.5 | 45 |
| 0 | 0 | 1 | 1 | 0 | 0 | 59 | 7.5 | 45 |
| 0 | 0 | 1 | 1 | 0 | 0 | 60 | 7.5 | 45 |
| 0 | 0 | 1 | 1 | 0 | 0 | 61 | 7.5 | 45 |
| 0 | 0 | 1 | 1 | 0 | 0 | 62 | 7.5 | 45 |
| 0 | 0 | 1 | 1 | 0 | 0 | 63 | 7.5 | 45 |
| 0 | 0 | 1 | 1 | 0 | 0 | 64 | 7.5 | 45 |
| 0 | 0 | 1 | 1 | 0 | 0 | 65 | 7.5 | 45 |
| 0 | 0 | 1 | 1 | 0 | 0 | 66 | 7.5 | 45 |
| 0 | 0 | 1 | 1 | 0 | 0 | 67 | 7.5 | 45 |
| 0 | 0 | 1 | 1 | 0 | 0 | 68 | 7.5 | 45 |
| 0 | 0 | 1 | 1 | 0 | 0 | 69 | 7.5 | 45 |
| 0 | 0 | 1 | 1 | 0 | 0 | 70 | 7.5 | 45 |

|   |   |   |   |   |   |     |     |     |
|---|---|---|---|---|---|-----|-----|-----|
| 0 | 0 | 1 | 1 | 0 | 0 | 71  | 7.5 | 45  |
| 0 | 0 | 1 | 1 | 0 | 0 | 72  | 7.5 | 45  |
| 0 | 0 | 1 | 1 | 0 | 0 | 73  | 7.5 | 45  |
| 0 | 0 | 1 | 1 | 0 | 0 | 74  | 7.5 | 45  |
| 0 | 0 | 1 | 1 | 0 | 0 | 75  | 7.5 | 45  |
| 0 | 0 | 1 | 1 | 0 | 0 | 76  | 7.5 | 45  |
| 0 | 0 | 1 | 1 | 0 | 0 | 77  | 7.5 | 45  |
| 0 | 0 | 1 | 1 | 0 | 0 | 78  | 7.5 | 45  |
| 0 | 0 | 1 | 1 | 0 | 0 | 79  | 7.5 | 45  |
| 0 | 0 | 1 | 1 | 0 | 0 | 80  | 7.5 | 45  |
| 0 | 0 | 1 | 1 | 0 | 0 | 81  | 7.5 | 45  |
| 0 | 0 | 1 | 1 | 0 | 0 | 82  | 7.5 | 45  |
| 0 | 0 | 1 | 1 | 0 | 0 | 83  | 7.5 | 45  |
| 0 | 0 | 1 | 1 | 0 | 0 | 84  | 7.5 | 45  |
| 0 | 0 | 1 | 1 | 0 | 0 | 85  | 7.5 | 45  |
| 0 | 0 | 1 | 1 | 0 | 0 | 86  | 7.5 | 45  |
| 0 | 0 | 1 | 1 | 0 | 0 | 87  | 7.5 | 45  |
| 0 | 0 | 1 | 1 | 0 | 0 | 88  | 7.5 | 45  |
| 0 | 0 | 1 | 1 | 0 | 0 | 89  | 7.5 | 45  |
| 0 | 0 | 1 | 1 | 0 | 0 | 90  | 7.5 | 135 |
| 0 | 0 | 1 | 1 | 0 | 0 | 91  | 7.5 | 135 |
| 0 | 0 | 1 | 1 | 0 | 0 | 92  | 7.5 | 135 |
| 0 | 0 | 1 | 1 | 0 | 0 | 93  | 7.5 | 135 |
| 0 | 0 | 1 | 1 | 0 | 0 | 94  | 7.5 | 135 |
| 0 | 0 | 1 | 1 | 0 | 0 | 95  | 7.5 | 135 |
| 0 | 0 | 1 | 1 | 0 | 0 | 96  | 7.5 | 135 |
| 0 | 0 | 1 | 1 | 0 | 0 | 97  | 7.5 | 135 |
| 0 | 0 | 1 | 1 | 0 | 0 | 98  | 7.5 | 135 |
| 0 | 0 | 1 | 1 | 0 | 0 | 99  | 7.5 | 135 |
| 0 | 0 | 1 | 1 | 0 | 0 | 100 | 7.5 | 135 |
| 0 | 0 | 1 | 1 | 0 | 0 | 101 | 7.5 | 135 |
| 0 | 0 | 1 | 1 | 0 | 0 | 102 | 7.5 | 135 |
| 0 | 0 | 1 | 1 | 0 | 0 | 103 | 7.5 | 135 |
| 0 | 0 | 1 | 1 | 0 | 0 | 104 | 7.5 | 135 |
| 0 | 0 | 1 | 1 | 0 | 0 | 105 | 7.5 | 135 |
| 0 | 0 | 1 | 1 | 0 | 0 | 106 | 7.5 | 135 |
| 0 | 0 | 1 | 1 | 0 | 0 | 107 | 7.5 | 135 |
| 0 | 0 | 1 | 1 | 0 | 0 | 108 | 7.5 | 135 |
| 0 | 0 | 1 | 1 | 0 | 0 | 109 | 7.5 | 135 |
| 0 | 0 | 1 | 1 | 0 | 0 | 110 | 7.5 | 135 |
| 0 | 0 | 1 | 1 | 0 | 0 | 111 | 7.5 | 135 |
| 0 | 0 | 1 | 1 | 0 | 0 | 112 | 7.5 | 135 |
| 0 | 0 | 1 | 1 | 0 | 0 | 113 | 7.5 | 135 |
| 0 | 0 | 1 | 1 | 0 | 0 | 114 | 7.5 | 135 |
| 0 | 0 | 1 | 1 | 0 | 0 | 115 | 7.5 | 135 |
| 0 | 0 | 1 | 1 | 0 | 0 | 116 | 7.5 | 135 |

|   |   |   |   |   |   |     |     |     |
|---|---|---|---|---|---|-----|-----|-----|
| 0 | 0 | 1 | 1 | 0 | 0 | 117 | 7.5 | 135 |
| 0 | 0 | 1 | 1 | 0 | 0 | 118 | 7.5 | 135 |
| 0 | 0 | 1 | 1 | 0 | 0 | 119 | 7.5 | 135 |
| 0 | 0 | 1 | 1 | 0 | 0 | 120 | 7.5 | 135 |
| 0 | 0 | 1 | 1 | 0 | 0 | 121 | 7.5 | 135 |
| 0 | 0 | 1 | 1 | 0 | 0 | 122 | 7.5 | 135 |
| 0 | 0 | 1 | 1 | 0 | 0 | 123 | 7.5 | 135 |
| 0 | 0 | 1 | 1 | 0 | 0 | 124 | 7.5 | 135 |
| 0 | 0 | 1 | 1 | 0 | 0 | 125 | 7.5 | 135 |
| 0 | 0 | 1 | 1 | 0 | 0 | 126 | 7.5 | 135 |
| 0 | 0 | 1 | 1 | 0 | 0 | 127 | 7.5 | 135 |
| 0 | 0 | 1 | 1 | 0 | 0 | 128 | 7.5 | 135 |
| 0 | 0 | 1 | 1 | 0 | 0 | 129 | 7.5 | 135 |
| 0 | 0 | 1 | 1 | 0 | 0 | 130 | 7.5 | 135 |
| 0 | 0 | 1 | 1 | 0 | 0 | 131 | 7.5 | 135 |
| 0 | 0 | 1 | 1 | 0 | 0 | 132 | 7.5 | 135 |
| 0 | 0 | 1 | 1 | 0 | 0 | 133 | 7.5 | 135 |
| 0 | 0 | 1 | 1 | 0 | 0 | 134 | 7.5 | 135 |
| 0 | 0 | 1 | 1 | 0 | 0 | 135 | 7.5 | 135 |
| 0 | 0 | 1 | 1 | 0 | 0 | 136 | 7.5 | 135 |
| 0 | 0 | 1 | 1 | 0 | 0 | 137 | 7.5 | 135 |
| 0 | 0 | 1 | 1 | 0 | 0 | 138 | 7.5 | 135 |
| 0 | 0 | 1 | 1 | 0 | 0 | 139 | 7.5 | 135 |
| 0 | 0 | 1 | 1 | 0 | 0 | 140 | 7.5 | 135 |
| 0 | 0 | 1 | 1 | 0 | 0 | 141 | 7.5 | 135 |
| 0 | 0 | 1 | 1 | 0 | 0 | 142 | 7.5 | 135 |
| 0 | 0 | 1 | 1 | 0 | 0 | 143 | 7.5 | 135 |
| 0 | 0 | 1 | 1 | 0 | 0 | 144 | 7.5 | 135 |
| 0 | 0 | 1 | 1 | 0 | 0 | 145 | 7.5 | 135 |
| 0 | 0 | 1 | 1 | 0 | 0 | 146 | 7.5 | 135 |
| 0 | 0 | 1 | 1 | 0 | 0 | 147 | 7.5 | 135 |
| 0 | 0 | 1 | 1 | 0 | 0 | 148 | 7.5 | 135 |
| 0 | 0 | 1 | 1 | 0 | 0 | 149 | 7.5 | 135 |
| 0 | 0 | 1 | 1 | 0 | 0 | 150 | 7.5 | 150 |
| 0 | 0 | 1 | 1 | 0 | 0 | 151 | 7.5 | 165 |
| 0 | 0 | 1 | 1 | 0 | 0 | 152 | 7.5 | 165 |
| 0 | 0 | 1 | 1 | 0 | 0 | 153 | 7.5 | 165 |
| 0 | 0 | 1 | 1 | 0 | 0 | 154 | 7.5 | 165 |
| 0 | 0 | 1 | 1 | 0 | 0 | 155 | 7.5 | 165 |
| 0 | 0 | 1 | 1 | 0 | 0 | 156 | 7.5 | 165 |
| 0 | 0 | 1 | 1 | 0 | 0 | 157 | 7.5 | 165 |
| 0 | 0 | 1 | 1 | 0 | 0 | 158 | 7.5 | 165 |
| 0 | 0 | 1 | 1 | 0 | 0 | 159 | 7.5 | 165 |
| 0 | 0 | 1 | 1 | 0 | 0 | 160 | 7.5 | 165 |
| 0 | 0 | 1 | 1 | 0 | 0 | 161 | 7.5 | 165 |
| 0 | 0 | 1 | 1 | 0 | 0 | 162 | 7.5 | 165 |

|   |   |   |   |   |   |     |     |     |
|---|---|---|---|---|---|-----|-----|-----|
| 0 | 0 | 1 | 1 | 0 | 0 | 163 | 7.5 | 165 |
| 0 | 0 | 1 | 1 | 0 | 0 | 164 | 7.5 | 165 |
| 0 | 0 | 1 | 1 | 0 | 0 | 165 | 7.5 | 165 |
| 0 | 0 | 1 | 1 | 0 | 0 | 166 | 7.5 | 165 |
| 0 | 0 | 1 | 1 | 0 | 0 | 167 | 7.5 | 165 |
| 0 | 0 | 1 | 1 | 0 | 0 | 168 | 7.5 | 165 |
| 0 | 0 | 1 | 1 | 0 | 0 | 169 | 7.5 | 165 |
| 0 | 0 | 1 | 1 | 0 | 0 | 170 | 7.5 | 165 |
| 0 | 0 | 1 | 1 | 0 | 0 | 171 | 7.5 | 165 |
| 0 | 0 | 1 | 1 | 0 | 0 | 172 | 7.5 | 165 |
| 0 | 0 | 1 | 1 | 0 | 0 | 173 | 7.5 | 165 |
| 0 | 0 | 1 | 1 | 0 | 0 | 174 | 7.5 | 165 |
| 0 | 0 | 1 | 1 | 0 | 0 | 175 | 7.5 | 165 |
| 0 | 0 | 1 | 1 | 0 | 0 | 176 | 7.5 | 165 |
| 0 | 0 | 1 | 1 | 0 | 0 | 177 | 7.5 | 165 |
| 0 | 0 | 1 | 1 | 0 | 0 | 178 | 7.5 | 165 |
| 0 | 0 | 1 | 1 | 0 | 0 | 179 | 7.5 | 165 |
| 0 | 0 | 1 | 1 | 0 | 0 | 180 | 7.5 | 180 |
| 0 | 0 | 1 | 0 | 1 | 0 | 0   | 7.5 | 0   |
| 0 | 0 | 1 | 0 | 1 | 0 | 1   | 7.5 | 15  |
| 0 | 0 | 1 | 0 | 1 | 0 | 2   | 7.5 | 15  |
| 0 | 0 | 1 | 0 | 1 | 0 | 3   | 7.5 | 15  |
| 0 | 0 | 1 | 0 | 1 | 0 | 4   | 7.5 | 15  |
| 0 | 0 | 1 | 0 | 1 | 0 | 5   | 7.5 | 15  |
| 0 | 0 | 1 | 0 | 1 | 0 | 6   | 7.5 | 15  |
| 0 | 0 | 1 | 0 | 1 | 0 | 7   | 7.5 | 15  |
| 0 | 0 | 1 | 0 | 1 | 0 | 8   | 7.5 | 15  |
| 0 | 0 | 1 | 0 | 1 | 0 | 9   | 7.5 | 15  |
| 0 | 0 | 1 | 0 | 1 | 0 | 10  | 7.5 | 15  |
| 0 | 0 | 1 | 0 | 1 | 0 | 11  | 7.5 | 15  |
| 0 | 0 | 1 | 0 | 1 | 0 | 12  | 7.5 | 15  |
| 0 | 0 | 1 | 0 | 1 | 0 | 13  | 7.5 | 15  |
| 0 | 0 | 1 | 0 | 1 | 0 | 14  | 7.5 | 15  |
| 0 | 0 | 1 | 0 | 1 | 0 | 15  | 7.5 | 15  |
| 0 | 0 | 1 | 0 | 1 | 0 | 16  | 7.5 | 15  |
| 0 | 0 | 1 | 0 | 1 | 0 | 17  | 7.5 | 15  |
| 0 | 0 | 1 | 0 | 1 | 0 | 18  | 7.5 | 15  |
| 0 | 0 | 1 | 0 | 1 | 0 | 19  | 7.5 | 15  |
| 0 | 0 | 1 | 0 | 1 | 0 | 20  | 7.5 | 15  |
| 0 | 0 | 1 | 0 | 1 | 0 | 21  | 7.5 | 15  |
| 0 | 0 | 1 | 0 | 1 | 0 | 22  | 7.5 | 15  |
| 0 | 0 | 1 | 0 | 1 | 0 | 23  | 7.5 | 15  |
| 0 | 0 | 1 | 0 | 1 | 0 | 24  | 7.5 | 15  |
| 0 | 0 | 1 | 0 | 1 | 0 | 25  | 7.5 | 15  |
| 0 | 0 | 1 | 0 | 1 | 0 | 26  | 7.5 | 15  |
| 0 | 0 | 1 | 0 | 1 | 0 | 27  | 7.5 | 15  |

|   |   |   |   |   |   |    |     |    |
|---|---|---|---|---|---|----|-----|----|
| 0 | 0 | 1 | 0 | 1 | 0 | 28 | 7.5 | 15 |
| 0 | 0 | 1 | 0 | 1 | 0 | 29 | 7.5 | 15 |
| 0 | 0 | 1 | 0 | 1 | 0 | 30 | 7.5 | 30 |
| 0 | 0 | 1 | 0 | 1 | 0 | 31 | 7.5 | 45 |
| 0 | 0 | 1 | 0 | 1 | 0 | 32 | 7.5 | 45 |
| 0 | 0 | 1 | 0 | 1 | 0 | 33 | 7.5 | 45 |
| 0 | 0 | 1 | 0 | 1 | 0 | 34 | 7.5 | 45 |
| 0 | 0 | 1 | 0 | 1 | 0 | 35 | 7.5 | 45 |
| 0 | 0 | 1 | 0 | 1 | 0 | 36 | 7.5 | 45 |
| 0 | 0 | 1 | 0 | 1 | 0 | 37 | 7.5 | 45 |
| 0 | 0 | 1 | 0 | 1 | 0 | 38 | 7.5 | 45 |
| 0 | 0 | 1 | 0 | 1 | 0 | 39 | 7.5 | 45 |
| 0 | 0 | 1 | 0 | 1 | 0 | 40 | 7.5 | 45 |
| 0 | 0 | 1 | 0 | 1 | 0 | 41 | 7.5 | 45 |
| 0 | 0 | 1 | 0 | 1 | 0 | 42 | 7.5 | 45 |
| 0 | 0 | 1 | 0 | 1 | 0 | 43 | 7.5 | 45 |
| 0 | 0 | 1 | 0 | 1 | 0 | 44 | 7.5 | 45 |
| 0 | 0 | 1 | 0 | 1 | 0 | 45 | 7.5 | 45 |
| 0 | 0 | 1 | 0 | 1 | 0 | 46 | 7.5 | 45 |
| 0 | 0 | 1 | 0 | 1 | 0 | 47 | 7.5 | 45 |
| 0 | 0 | 1 | 0 | 1 | 0 | 48 | 7.5 | 45 |
| 0 | 0 | 1 | 0 | 1 | 0 | 49 | 7.5 | 45 |
| 0 | 0 | 1 | 0 | 1 | 0 | 50 | 7.5 | 45 |
| 0 | 0 | 1 | 0 | 1 | 0 | 51 | 7.5 | 45 |
| 0 | 0 | 1 | 0 | 1 | 0 | 52 | 7.5 | 45 |
| 0 | 0 | 1 | 0 | 1 | 0 | 53 | 7.5 | 45 |
| 0 | 0 | 1 | 0 | 1 | 0 | 54 | 7.5 | 45 |
| 0 | 0 | 1 | 0 | 1 | 0 | 55 | 7.5 | 45 |
| 0 | 0 | 1 | 0 | 1 | 0 | 56 | 7.5 | 45 |
| 0 | 0 | 1 | 0 | 1 | 0 | 57 | 7.5 | 45 |
| 0 | 0 | 1 | 0 | 1 | 0 | 58 | 7.5 | 45 |
| 0 | 0 | 1 | 0 | 1 | 0 | 59 | 7.5 | 45 |
| 0 | 0 | 1 | 0 | 1 | 0 | 60 | 7.5 | 45 |
| 0 | 0 | 1 | 0 | 1 | 0 | 61 | 7.5 | 45 |
| 0 | 0 | 1 | 0 | 1 | 0 | 62 | 7.5 | 45 |
| 0 | 0 | 1 | 0 | 1 | 0 | 63 | 7.5 | 45 |
| 0 | 0 | 1 | 0 | 1 | 0 | 64 | 7.5 | 45 |
| 0 | 0 | 1 | 0 | 1 | 0 | 65 | 7.5 | 45 |
| 0 | 0 | 1 | 0 | 1 | 0 | 66 | 7.5 | 45 |
| 0 | 0 | 1 | 0 | 1 | 0 | 67 | 7.5 | 45 |
| 0 | 0 | 1 | 0 | 1 | 0 | 68 | 7.5 | 45 |
| 0 | 0 | 1 | 0 | 1 | 0 | 69 | 7.5 | 45 |
| 0 | 0 | 1 | 0 | 1 | 0 | 70 | 7.5 | 45 |
| 0 | 0 | 1 | 0 | 1 | 0 | 71 | 7.5 | 45 |
| 0 | 0 | 1 | 0 | 1 | 0 | 72 | 7.5 | 45 |
| 0 | 0 | 1 | 0 | 1 | 0 | 73 | 7.5 | 45 |

|   |   |   |   |   |   |     |     |     |
|---|---|---|---|---|---|-----|-----|-----|
| 0 | 0 | 1 | 0 | 1 | 0 | 74  | 7.5 | 45  |
| 0 | 0 | 1 | 0 | 1 | 0 | 75  | 7.5 | 45  |
| 0 | 0 | 1 | 0 | 1 | 0 | 76  | 7.5 | 105 |
| 0 | 0 | 1 | 0 | 1 | 0 | 77  | 7.5 | 105 |
| 0 | 0 | 1 | 0 | 1 | 0 | 78  | 7.5 | 105 |
| 0 | 0 | 1 | 0 | 1 | 0 | 79  | 7.5 | 105 |
| 0 | 0 | 1 | 0 | 1 | 0 | 80  | 7.5 | 105 |
| 0 | 0 | 1 | 0 | 1 | 0 | 81  | 7.5 | 105 |
| 0 | 0 | 1 | 0 | 1 | 0 | 82  | 7.5 | 105 |
| 0 | 0 | 1 | 0 | 1 | 0 | 83  | 7.5 | 105 |
| 0 | 0 | 1 | 0 | 1 | 0 | 84  | 7.5 | 105 |
| 0 | 0 | 1 | 0 | 1 | 0 | 85  | 7.5 | 105 |
| 0 | 0 | 1 | 0 | 1 | 0 | 86  | 7.5 | 105 |
| 0 | 0 | 1 | 0 | 1 | 0 | 87  | 7.5 | 105 |
| 0 | 0 | 1 | 0 | 1 | 0 | 88  | 7.5 | 105 |
| 0 | 0 | 1 | 0 | 1 | 0 | 89  | 7.5 | 105 |
| 0 | 0 | 1 | 0 | 1 | 0 | 90  | 7.5 | 105 |
| 0 | 0 | 1 | 0 | 1 | 0 | 91  | 7.5 | 105 |
| 0 | 0 | 1 | 0 | 1 | 0 | 92  | 7.5 | 105 |
| 0 | 0 | 1 | 0 | 1 | 0 | 93  | 7.5 | 105 |
| 0 | 0 | 1 | 0 | 1 | 0 | 94  | 7.5 | 105 |
| 0 | 0 | 1 | 0 | 1 | 0 | 95  | 7.5 | 105 |
| 0 | 0 | 1 | 0 | 1 | 0 | 96  | 7.5 | 105 |
| 0 | 0 | 1 | 0 | 1 | 0 | 97  | 7.5 | 105 |
| 0 | 0 | 1 | 0 | 1 | 0 | 98  | 7.5 | 105 |
| 0 | 0 | 1 | 0 | 1 | 0 | 99  | 7.5 | 105 |
| 0 | 0 | 1 | 0 | 1 | 0 | 100 | 7.5 | 105 |
| 0 | 0 | 1 | 0 | 1 | 0 | 101 | 7.5 | 105 |
| 0 | 0 | 1 | 0 | 1 | 0 | 102 | 7.5 | 105 |
| 0 | 0 | 1 | 0 | 1 | 0 | 103 | 7.5 | 105 |
| 0 | 0 | 1 | 0 | 1 | 0 | 104 | 7.5 | 105 |
| 0 | 0 | 1 | 0 | 1 | 0 | 105 | 7.5 | 105 |
| 0 | 0 | 1 | 0 | 1 | 0 | 106 | 7.5 | 105 |
| 0 | 0 | 1 | 0 | 1 | 0 | 107 | 7.5 | 105 |
| 0 | 0 | 1 | 0 | 1 | 0 | 108 | 7.5 | 105 |
| 0 | 0 | 1 | 0 | 1 | 0 | 109 | 7.5 | 105 |
| 0 | 0 | 1 | 0 | 1 | 0 | 110 | 7.5 | 105 |
| 0 | 0 | 1 | 0 | 1 | 0 | 111 | 7.5 | 105 |
| 0 | 0 | 1 | 0 | 1 | 0 | 112 | 7.5 | 105 |
| 0 | 0 | 1 | 0 | 1 | 0 | 113 | 7.5 | 105 |
| 0 | 0 | 1 | 0 | 1 | 0 | 114 | 7.5 | 105 |
| 0 | 0 | 1 | 0 | 1 | 0 | 115 | 7.5 | 105 |
| 0 | 0 | 1 | 0 | 1 | 0 | 116 | 7.5 | 105 |
| 0 | 0 | 1 | 0 | 1 | 0 | 117 | 7.5 | 105 |
| 0 | 0 | 1 | 0 | 1 | 0 | 118 | 7.5 | 105 |
| 0 | 0 | 1 | 0 | 1 | 0 | 119 | 7.5 | 105 |

|   |   |   |   |   |   |     |     |     |
|---|---|---|---|---|---|-----|-----|-----|
| 0 | 0 | 1 | 0 | 1 | 0 | 120 | 7.5 | 105 |
| 0 | 0 | 1 | 0 | 1 | 0 | 121 | 7.5 | 105 |
| 0 | 0 | 1 | 0 | 1 | 0 | 122 | 7.5 | 105 |
| 0 | 0 | 1 | 0 | 1 | 0 | 123 | 7.5 | 105 |
| 0 | 0 | 1 | 0 | 1 | 0 | 124 | 7.5 | 105 |
| 0 | 0 | 1 | 0 | 1 | 0 | 125 | 7.5 | 105 |
| 0 | 0 | 1 | 0 | 1 | 0 | 126 | 7.5 | 105 |
| 0 | 0 | 1 | 0 | 1 | 0 | 127 | 7.5 | 105 |
| 0 | 0 | 1 | 0 | 1 | 0 | 128 | 7.5 | 105 |
| 0 | 0 | 1 | 0 | 1 | 0 | 129 | 7.5 | 105 |
| 0 | 0 | 1 | 0 | 1 | 0 | 130 | 7.5 | 105 |
| 0 | 0 | 1 | 0 | 1 | 0 | 131 | 7.5 | 105 |
| 0 | 0 | 1 | 0 | 1 | 0 | 132 | 7.5 | 105 |
| 0 | 0 | 1 | 0 | 1 | 0 | 133 | 7.5 | 105 |
| 0 | 0 | 1 | 0 | 1 | 0 | 134 | 7.5 | 105 |
| 0 | 0 | 1 | 0 | 1 | 0 | 135 | 7.5 | 105 |
| 0 | 0 | 1 | 0 | 1 | 0 | 136 | 7.5 | 165 |
| 0 | 0 | 1 | 0 | 1 | 0 | 137 | 7.5 | 165 |
| 0 | 0 | 1 | 0 | 1 | 0 | 138 | 7.5 | 165 |
| 0 | 0 | 1 | 0 | 1 | 0 | 139 | 7.5 | 165 |
| 0 | 0 | 1 | 0 | 1 | 0 | 140 | 7.5 | 165 |
| 0 | 0 | 1 | 0 | 1 | 0 | 141 | 7.5 | 165 |
| 0 | 0 | 1 | 0 | 1 | 0 | 142 | 7.5 | 165 |
| 0 | 0 | 1 | 0 | 1 | 0 | 143 | 7.5 | 165 |
| 0 | 0 | 1 | 0 | 1 | 0 | 144 | 7.5 | 165 |
| 0 | 0 | 1 | 0 | 1 | 0 | 145 | 7.5 | 165 |
| 0 | 0 | 1 | 0 | 1 | 0 | 146 | 7.5 | 165 |
| 0 | 0 | 1 | 0 | 1 | 0 | 147 | 7.5 | 165 |
| 0 | 0 | 1 | 0 | 1 | 0 | 148 | 7.5 | 165 |
| 0 | 0 | 1 | 0 | 1 | 0 | 149 | 7.5 | 165 |
| 0 | 0 | 1 | 0 | 1 | 0 | 150 | 7.5 | 165 |
| 0 | 0 | 1 | 0 | 1 | 0 | 151 | 7.5 | 165 |
| 0 | 0 | 1 | 0 | 1 | 0 | 152 | 7.5 | 165 |
| 0 | 0 | 1 | 0 | 1 | 0 | 153 | 7.5 | 165 |
| 0 | 0 | 1 | 0 | 1 | 0 | 154 | 7.5 | 165 |
| 0 | 0 | 1 | 0 | 1 | 0 | 155 | 7.5 | 165 |
| 0 | 0 | 1 | 0 | 1 | 0 | 156 | 7.5 | 165 |
| 0 | 0 | 1 | 0 | 1 | 0 | 157 | 7.5 | 165 |
| 0 | 0 | 1 | 0 | 1 | 0 | 158 | 7.5 | 165 |
| 0 | 0 | 1 | 0 | 1 | 0 | 159 | 7.5 | 165 |
| 0 | 0 | 1 | 0 | 1 | 0 | 160 | 7.5 | 165 |
| 0 | 0 | 1 | 0 | 1 | 0 | 161 | 7.5 | 165 |
| 0 | 0 | 1 | 0 | 1 | 0 | 162 | 7.5 | 165 |
| 0 | 0 | 1 | 0 | 1 | 0 | 163 | 7.5 | 165 |
| 0 | 0 | 1 | 0 | 1 | 0 | 164 | 7.5 | 165 |
| 0 | 0 | 1 | 0 | 1 | 0 | 165 | 7.5 | 165 |

|   |   |   |   |   |   |     |     |     |
|---|---|---|---|---|---|-----|-----|-----|
| 0 | 0 | 1 | 0 | 1 | 0 | 166 | 7.5 | 165 |
| 0 | 0 | 1 | 0 | 1 | 0 | 167 | 7.5 | 165 |
| 0 | 0 | 1 | 0 | 1 | 0 | 168 | 7.5 | 165 |
| 0 | 0 | 1 | 0 | 1 | 0 | 169 | 7.5 | 165 |
| 0 | 0 | 1 | 0 | 1 | 0 | 170 | 7.5 | 165 |
| 0 | 0 | 1 | 0 | 1 | 0 | 171 | 7.5 | 165 |
| 0 | 0 | 1 | 0 | 1 | 0 | 172 | 7.5 | 165 |
| 0 | 0 | 1 | 0 | 1 | 0 | 173 | 7.5 | 165 |
| 0 | 0 | 1 | 0 | 1 | 0 | 174 | 7.5 | 165 |
| 0 | 0 | 1 | 0 | 1 | 0 | 175 | 7.5 | 165 |
| 0 | 0 | 1 | 0 | 1 | 0 | 176 | 7.5 | 165 |
| 0 | 0 | 1 | 0 | 1 | 0 | 177 | 7.5 | 165 |
| 0 | 0 | 1 | 0 | 1 | 0 | 178 | 7.5 | 165 |
| 0 | 0 | 1 | 0 | 1 | 0 | 179 | 7.5 | 165 |
| 0 | 0 | 1 | 0 | 1 | 0 | 180 | 7.5 | 180 |
| 0 | 0 | 1 | 0 | 0 | 1 | 0   | 7.5 | 0   |
| 0 | 0 | 1 | 0 | 0 | 1 | 1   | 7.5 | 15  |
| 0 | 0 | 1 | 0 | 0 | 1 | 2   | 7.5 | 15  |
| 0 | 0 | 1 | 0 | 0 | 1 | 3   | 7.5 | 15  |
| 0 | 0 | 1 | 0 | 0 | 1 | 4   | 7.5 | 15  |
| 0 | 0 | 1 | 0 | 0 | 1 | 5   | 7.5 | 15  |
| 0 | 0 | 1 | 0 | 0 | 1 | 6   | 7.5 | 15  |
| 0 | 0 | 1 | 0 | 0 | 1 | 7   | 7.5 | 15  |
| 0 | 0 | 1 | 0 | 0 | 1 | 8   | 7.5 | 15  |
| 0 | 0 | 1 | 0 | 0 | 1 | 9   | 7.5 | 15  |
| 0 | 0 | 1 | 0 | 0 | 1 | 10  | 7.5 | 15  |
| 0 | 0 | 1 | 0 | 0 | 1 | 11  | 7.5 | 15  |
| 0 | 0 | 1 | 0 | 0 | 1 | 12  | 7.5 | 15  |
| 0 | 0 | 1 | 0 | 0 | 1 | 13  | 7.5 | 15  |
| 0 | 0 | 1 | 0 | 0 | 1 | 14  | 7.5 | 15  |
| 0 | 0 | 1 | 0 | 0 | 1 | 15  | 7.5 | 15  |
| 0 | 0 | 1 | 0 | 0 | 1 | 16  | 7.5 | 15  |
| 0 | 0 | 1 | 0 | 0 | 1 | 17  | 7.5 | 15  |
| 0 | 0 | 1 | 0 | 0 | 1 | 18  | 7.5 | 15  |
| 0 | 0 | 1 | 0 | 0 | 1 | 19  | 7.5 | 15  |
| 0 | 0 | 1 | 0 | 0 | 1 | 20  | 7.5 | 15  |
| 0 | 0 | 1 | 0 | 0 | 1 | 21  | 7.5 | 15  |
| 0 | 0 | 1 | 0 | 0 | 1 | 22  | 7.5 | 15  |
| 0 | 0 | 1 | 0 | 0 | 1 | 23  | 7.5 | 15  |
| 0 | 0 | 1 | 0 | 0 | 1 | 24  | 7.5 | 15  |
| 0 | 0 | 1 | 0 | 0 | 1 | 25  | 7.5 | 15  |
| 0 | 0 | 1 | 0 | 0 | 1 | 26  | 7.5 | 15  |
| 0 | 0 | 1 | 0 | 0 | 1 | 27  | 7.5 | 15  |
| 0 | 0 | 1 | 0 | 0 | 1 | 28  | 7.5 | 15  |
| 0 | 0 | 1 | 0 | 0 | 1 | 29  | 7.5 | 15  |
| 0 | 0 | 1 | 0 | 0 | 1 | 30  | 7.5 | 30  |

|   |   |   |   |   |   |    |     |     |
|---|---|---|---|---|---|----|-----|-----|
| 0 | 0 | 1 | 0 | 0 | 1 | 31 | 7.5 | 45  |
| 0 | 0 | 1 | 0 | 0 | 1 | 32 | 7.5 | 45  |
| 0 | 0 | 1 | 0 | 0 | 1 | 33 | 7.5 | 45  |
| 0 | 0 | 1 | 0 | 0 | 1 | 34 | 7.5 | 45  |
| 0 | 0 | 1 | 0 | 0 | 1 | 35 | 7.5 | 45  |
| 0 | 0 | 1 | 0 | 0 | 1 | 36 | 7.5 | 45  |
| 0 | 0 | 1 | 0 | 0 | 1 | 37 | 7.5 | 45  |
| 0 | 0 | 1 | 0 | 0 | 1 | 38 | 7.5 | 45  |
| 0 | 0 | 1 | 0 | 0 | 1 | 39 | 7.5 | 45  |
| 0 | 0 | 1 | 0 | 0 | 1 | 40 | 7.5 | 45  |
| 0 | 0 | 1 | 0 | 0 | 1 | 41 | 7.5 | 45  |
| 0 | 0 | 1 | 0 | 0 | 1 | 42 | 7.5 | 45  |
| 0 | 0 | 1 | 0 | 0 | 1 | 43 | 7.5 | 45  |
| 0 | 0 | 1 | 0 | 0 | 1 | 44 | 7.5 | 45  |
| 0 | 0 | 1 | 0 | 0 | 1 | 45 | 7.5 | 45  |
| 0 | 0 | 1 | 0 | 0 | 1 | 46 | 7.5 | 45  |
| 0 | 0 | 1 | 0 | 0 | 1 | 47 | 7.5 | 45  |
| 0 | 0 | 1 | 0 | 0 | 1 | 48 | 7.5 | 45  |
| 0 | 0 | 1 | 0 | 0 | 1 | 49 | 7.5 | 45  |
| 0 | 0 | 1 | 0 | 0 | 1 | 50 | 7.5 | 45  |
| 0 | 0 | 1 | 0 | 0 | 1 | 51 | 7.5 | 45  |
| 0 | 0 | 1 | 0 | 0 | 1 | 52 | 7.5 | 45  |
| 0 | 0 | 1 | 0 | 0 | 1 | 53 | 7.5 | 45  |
| 0 | 0 | 1 | 0 | 0 | 1 | 54 | 7.5 | 45  |
| 0 | 0 | 1 | 0 | 0 | 1 | 55 | 7.5 | 45  |
| 0 | 0 | 1 | 0 | 0 | 1 | 56 | 7.5 | 45  |
| 0 | 0 | 1 | 0 | 0 | 1 | 57 | 7.5 | 45  |
| 0 | 0 | 1 | 0 | 0 | 1 | 58 | 7.5 | 45  |
| 0 | 0 | 1 | 0 | 0 | 1 | 59 | 7.5 | 45  |
| 0 | 0 | 1 | 0 | 0 | 1 | 60 | 7.5 | 45  |
| 0 | 0 | 1 | 0 | 0 | 1 | 61 | 7.5 | 45  |
| 0 | 0 | 1 | 0 | 0 | 1 | 62 | 7.5 | 45  |
| 0 | 0 | 1 | 0 | 0 | 1 | 63 | 7.5 | 45  |
| 0 | 0 | 1 | 0 | 0 | 1 | 64 | 7.5 | 45  |
| 0 | 0 | 1 | 0 | 0 | 1 | 65 | 7.5 | 45  |
| 0 | 0 | 1 | 0 | 0 | 1 | 66 | 7.5 | 45  |
| 0 | 0 | 1 | 0 | 0 | 1 | 67 | 7.5 | 45  |
| 0 | 0 | 1 | 0 | 0 | 1 | 68 | 7.5 | 45  |
| 0 | 0 | 1 | 0 | 0 | 1 | 69 | 7.5 | 45  |
| 0 | 0 | 1 | 0 | 0 | 1 | 70 | 7.5 | 45  |
| 0 | 0 | 1 | 0 | 0 | 1 | 71 | 7.5 | 45  |
| 0 | 0 | 1 | 0 | 0 | 1 | 72 | 7.5 | 45  |
| 0 | 0 | 1 | 0 | 0 | 1 | 73 | 7.5 | 45  |
| 0 | 0 | 1 | 0 | 0 | 1 | 74 | 7.5 | 45  |
| 0 | 0 | 1 | 0 | 0 | 1 | 75 | 7.5 | 45  |
| 0 | 0 | 1 | 0 | 0 | 1 | 76 | 7.5 | 105 |

|   |   |   |   |   |   |     |     |     |
|---|---|---|---|---|---|-----|-----|-----|
| 0 | 0 | 1 | 0 | 0 | 1 | 77  | 7.5 | 105 |
| 0 | 0 | 1 | 0 | 0 | 1 | 78  | 7.5 | 105 |
| 0 | 0 | 1 | 0 | 0 | 1 | 79  | 7.5 | 105 |
| 0 | 0 | 1 | 0 | 0 | 1 | 80  | 7.5 | 105 |
| 0 | 0 | 1 | 0 | 0 | 1 | 81  | 7.5 | 105 |
| 0 | 0 | 1 | 0 | 0 | 1 | 82  | 7.5 | 105 |
| 0 | 0 | 1 | 0 | 0 | 1 | 83  | 7.5 | 105 |
| 0 | 0 | 1 | 0 | 0 | 1 | 84  | 7.5 | 105 |
| 0 | 0 | 1 | 0 | 0 | 1 | 85  | 7.5 | 105 |
| 0 | 0 | 1 | 0 | 0 | 1 | 86  | 7.5 | 105 |
| 0 | 0 | 1 | 0 | 0 | 1 | 87  | 7.5 | 105 |
| 0 | 0 | 1 | 0 | 0 | 1 | 88  | 7.5 | 105 |
| 0 | 0 | 1 | 0 | 0 | 1 | 89  | 7.5 | 105 |
| 0 | 0 | 1 | 0 | 0 | 1 | 90  | 7.5 | 105 |
| 0 | 0 | 1 | 0 | 0 | 1 | 91  | 7.5 | 105 |
| 0 | 0 | 1 | 0 | 0 | 1 | 92  | 7.5 | 105 |
| 0 | 0 | 1 | 0 | 0 | 1 | 93  | 7.5 | 105 |
| 0 | 0 | 1 | 0 | 0 | 1 | 94  | 7.5 | 105 |
| 0 | 0 | 1 | 0 | 0 | 1 | 95  | 7.5 | 105 |
| 0 | 0 | 1 | 0 | 0 | 1 | 96  | 7.5 | 105 |
| 0 | 0 | 1 | 0 | 0 | 1 | 97  | 7.5 | 105 |
| 0 | 0 | 1 | 0 | 0 | 1 | 98  | 7.5 | 105 |
| 0 | 0 | 1 | 0 | 0 | 1 | 99  | 7.5 | 105 |
| 0 | 0 | 1 | 0 | 0 | 1 | 100 | 7.5 | 105 |
| 0 | 0 | 1 | 0 | 0 | 1 | 101 | 7.5 | 105 |
| 0 | 0 | 1 | 0 | 0 | 1 | 102 | 7.5 | 105 |
| 0 | 0 | 1 | 0 | 0 | 1 | 103 | 7.5 | 105 |
| 0 | 0 | 1 | 0 | 0 | 1 | 104 | 7.5 | 105 |
| 0 | 0 | 1 | 0 | 0 | 1 | 105 | 7.5 | 105 |
| 0 | 0 | 1 | 0 | 0 | 1 | 106 | 7.5 | 105 |
| 0 | 0 | 1 | 0 | 0 | 1 | 107 | 7.5 | 105 |
| 0 | 0 | 1 | 0 | 0 | 1 | 108 | 7.5 | 105 |
| 0 | 0 | 1 | 0 | 0 | 1 | 109 | 7.5 | 105 |
| 0 | 0 | 1 | 0 | 0 | 1 | 110 | 7.5 | 105 |
| 0 | 0 | 1 | 0 | 0 | 1 | 111 | 7.5 | 105 |
| 0 | 0 | 1 | 0 | 0 | 1 | 112 | 7.5 | 105 |
| 0 | 0 | 1 | 0 | 0 | 1 | 113 | 7.5 | 105 |
| 0 | 0 | 1 | 0 | 0 | 1 | 114 | 7.5 | 105 |
| 0 | 0 | 1 | 0 | 0 | 1 | 115 | 7.5 | 105 |
| 0 | 0 | 1 | 0 | 0 | 1 | 116 | 7.5 | 105 |
| 0 | 0 | 1 | 0 | 0 | 1 | 117 | 7.5 | 105 |
| 0 | 0 | 1 | 0 | 0 | 1 | 118 | 7.5 | 105 |
| 0 | 0 | 1 | 0 | 0 | 1 | 119 | 7.5 | 105 |
| 0 | 0 | 1 | 0 | 0 | 1 | 120 | 7.5 | 120 |
| 0 | 0 | 1 | 0 | 0 | 1 | 121 | 7.5 | 135 |
| 0 | 0 | 1 | 0 | 0 | 1 | 122 | 7.5 | 135 |

|   |   |   |   |   |   |     |     |     |
|---|---|---|---|---|---|-----|-----|-----|
| 0 | 0 | 1 | 0 | 0 | 1 | 123 | 7.5 | 135 |
| 0 | 0 | 1 | 0 | 0 | 1 | 124 | 7.5 | 135 |
| 0 | 0 | 1 | 0 | 0 | 1 | 125 | 7.5 | 135 |
| 0 | 0 | 1 | 0 | 0 | 1 | 126 | 7.5 | 135 |
| 0 | 0 | 1 | 0 | 0 | 1 | 127 | 7.5 | 135 |
| 0 | 0 | 1 | 0 | 0 | 1 | 128 | 7.5 | 135 |
| 0 | 0 | 1 | 0 | 0 | 1 | 129 | 7.5 | 135 |
| 0 | 0 | 1 | 0 | 0 | 1 | 130 | 7.5 | 135 |
| 0 | 0 | 1 | 0 | 0 | 1 | 131 | 7.5 | 135 |
| 0 | 0 | 1 | 0 | 0 | 1 | 132 | 7.5 | 135 |
| 0 | 0 | 1 | 0 | 0 | 1 | 133 | 7.5 | 135 |
| 0 | 0 | 1 | 0 | 0 | 1 | 134 | 7.5 | 135 |
| 0 | 0 | 1 | 0 | 0 | 1 | 135 | 7.5 | 135 |
| 0 | 0 | 1 | 0 | 0 | 1 | 136 | 7.5 | 135 |
| 0 | 0 | 1 | 0 | 0 | 1 | 137 | 7.5 | 135 |
| 0 | 0 | 1 | 0 | 0 | 1 | 138 | 7.5 | 135 |
| 0 | 0 | 1 | 0 | 0 | 1 | 139 | 7.5 | 135 |
| 0 | 0 | 1 | 0 | 0 | 1 | 140 | 7.5 | 135 |
| 0 | 0 | 1 | 0 | 0 | 1 | 141 | 7.5 | 135 |
| 0 | 0 | 1 | 0 | 0 | 1 | 142 | 7.5 | 135 |
| 0 | 0 | 1 | 0 | 0 | 1 | 143 | 7.5 | 135 |
| 0 | 0 | 1 | 0 | 0 | 1 | 144 | 7.5 | 135 |
| 0 | 0 | 1 | 0 | 0 | 1 | 145 | 7.5 | 135 |
| 0 | 0 | 1 | 0 | 0 | 1 | 146 | 7.5 | 135 |
| 0 | 0 | 1 | 0 | 0 | 1 | 147 | 7.5 | 135 |
| 0 | 0 | 1 | 0 | 0 | 1 | 148 | 7.5 | 135 |
| 0 | 0 | 1 | 0 | 0 | 1 | 149 | 7.5 | 135 |
| 0 | 0 | 1 | 0 | 0 | 1 | 150 | 7.5 | 135 |
| 0 | 0 | 1 | 0 | 0 | 1 | 151 | 7.5 | 135 |
| 0 | 0 | 1 | 0 | 0 | 1 | 152 | 7.5 | 135 |
| 0 | 0 | 1 | 0 | 0 | 1 | 153 | 7.5 | 135 |
| 0 | 0 | 1 | 0 | 0 | 1 | 154 | 7.5 | 135 |
| 0 | 0 | 1 | 0 | 0 | 1 | 155 | 7.5 | 135 |
| 0 | 0 | 1 | 0 | 0 | 1 | 156 | 7.5 | 135 |
| 0 | 0 | 1 | 0 | 0 | 1 | 157 | 7.5 | 135 |
| 0 | 0 | 1 | 0 | 0 | 1 | 158 | 7.5 | 135 |
| 0 | 0 | 1 | 0 | 0 | 1 | 159 | 7.5 | 135 |
| 0 | 0 | 1 | 0 | 0 | 1 | 160 | 7.5 | 135 |
| 0 | 0 | 1 | 0 | 0 | 1 | 161 | 7.5 | 135 |
| 0 | 0 | 1 | 0 | 0 | 1 | 162 | 7.5 | 135 |
| 0 | 0 | 1 | 0 | 0 | 1 | 163 | 7.5 | 135 |
| 0 | 0 | 1 | 0 | 0 | 1 | 164 | 7.5 | 135 |
| 0 | 0 | 1 | 0 | 0 | 1 | 165 | 7.5 | 135 |
| 0 | 0 | 1 | 0 | 0 | 1 | 166 | 7.5 | 135 |
| 0 | 0 | 1 | 0 | 0 | 1 | 167 | 7.5 | 135 |
| 0 | 0 | 1 | 0 | 0 | 1 | 168 | 7.5 | 135 |

|   |   |   |   |   |   |     |     |     |
|---|---|---|---|---|---|-----|-----|-----|
| 0 | 0 | 1 | 0 | 0 | 1 | 169 | 7.5 | 135 |
| 0 | 0 | 1 | 0 | 0 | 1 | 170 | 7.5 | 135 |
| 0 | 0 | 1 | 0 | 0 | 1 | 171 | 7.5 | 135 |
| 0 | 0 | 1 | 0 | 0 | 1 | 172 | 7.5 | 135 |
| 0 | 0 | 1 | 0 | 0 | 1 | 173 | 7.5 | 135 |
| 0 | 0 | 1 | 0 | 0 | 1 | 174 | 7.5 | 135 |
| 0 | 0 | 1 | 0 | 0 | 1 | 175 | 7.5 | 135 |
| 0 | 0 | 1 | 0 | 0 | 1 | 176 | 7.5 | 135 |
| 0 | 0 | 1 | 0 | 0 | 1 | 177 | 7.5 | 135 |
| 0 | 0 | 1 | 0 | 0 | 1 | 178 | 7.5 | 135 |
| 0 | 0 | 1 | 0 | 0 | 1 | 179 | 7.5 | 135 |
| 0 | 0 | 1 | 0 | 0 | 1 | 180 | 7.5 | 135 |
| 0 | 0 | 0 | 1 | 1 | 0 | 0   | 7.5 | 0   |
| 0 | 0 | 0 | 1 | 1 | 0 | 1   | 7.5 | 15  |
| 0 | 0 | 0 | 1 | 1 | 0 | 2   | 7.5 | 15  |
| 0 | 0 | 0 | 1 | 1 | 0 | 3   | 7.5 | 15  |
| 0 | 0 | 0 | 1 | 1 | 0 | 4   | 7.5 | 15  |
| 0 | 0 | 0 | 1 | 1 | 0 | 5   | 7.5 | 15  |
| 0 | 0 | 0 | 1 | 1 | 0 | 6   | 7.5 | 15  |
| 0 | 0 | 0 | 1 | 1 | 0 | 7   | 7.5 | 15  |
| 0 | 0 | 0 | 1 | 1 | 0 | 8   | 7.5 | 15  |
| 0 | 0 | 0 | 1 | 1 | 0 | 9   | 7.5 | 15  |
| 0 | 0 | 0 | 1 | 1 | 0 | 10  | 7.5 | 15  |
| 0 | 0 | 0 | 1 | 1 | 0 | 11  | 7.5 | 15  |
| 0 | 0 | 0 | 1 | 1 | 0 | 12  | 7.5 | 15  |
| 0 | 0 | 0 | 1 | 1 | 0 | 13  | 7.5 | 15  |
| 0 | 0 | 0 | 1 | 1 | 0 | 14  | 7.5 | 15  |
| 0 | 0 | 0 | 1 | 1 | 0 | 15  | 7.5 | 15  |
| 0 | 0 | 0 | 1 | 1 | 0 | 16  | 7.5 | 15  |
| 0 | 0 | 0 | 1 | 1 | 0 | 17  | 7.5 | 15  |
| 0 | 0 | 0 | 1 | 1 | 0 | 18  | 7.5 | 15  |
| 0 | 0 | 0 | 1 | 1 | 0 | 19  | 7.5 | 15  |
| 0 | 0 | 0 | 1 | 1 | 0 | 20  | 7.5 | 15  |
| 0 | 0 | 0 | 1 | 1 | 0 | 21  | 7.5 | 15  |
| 0 | 0 | 0 | 1 | 1 | 0 | 22  | 7.5 | 15  |
| 0 | 0 | 0 | 1 | 1 | 0 | 23  | 7.5 | 15  |
| 0 | 0 | 0 | 1 | 1 | 0 | 24  | 7.5 | 15  |
| 0 | 0 | 0 | 1 | 1 | 0 | 25  | 7.5 | 15  |
| 0 | 0 | 0 | 1 | 1 | 0 | 26  | 7.5 | 15  |
| 0 | 0 | 0 | 1 | 1 | 0 | 27  | 7.5 | 15  |
| 0 | 0 | 0 | 1 | 1 | 0 | 28  | 7.5 | 15  |
| 0 | 0 | 0 | 1 | 1 | 0 | 29  | 7.5 | 15  |
| 0 | 0 | 0 | 1 | 1 | 0 | 30  | 7.5 | 30  |
| 0 | 0 | 0 | 1 | 1 | 0 | 31  | 7.5 | 45  |
| 0 | 0 | 0 | 1 | 1 | 0 | 32  | 7.5 | 45  |
| 0 | 0 | 0 | 1 | 1 | 0 | 33  | 7.5 | 45  |

|   |   |   |   |   |   |    |     |    |
|---|---|---|---|---|---|----|-----|----|
| 0 | 0 | 0 | 1 | 1 | 0 | 34 | 7.5 | 45 |
| 0 | 0 | 0 | 1 | 1 | 0 | 35 | 7.5 | 45 |
| 0 | 0 | 0 | 1 | 1 | 0 | 36 | 7.5 | 45 |
| 0 | 0 | 0 | 1 | 1 | 0 | 37 | 7.5 | 45 |
| 0 | 0 | 0 | 1 | 1 | 0 | 38 | 7.5 | 45 |
| 0 | 0 | 0 | 1 | 1 | 0 | 39 | 7.5 | 45 |
| 0 | 0 | 0 | 1 | 1 | 0 | 40 | 7.5 | 45 |
| 0 | 0 | 0 | 1 | 1 | 0 | 41 | 7.5 | 45 |
| 0 | 0 | 0 | 1 | 1 | 0 | 42 | 7.5 | 45 |
| 0 | 0 | 0 | 1 | 1 | 0 | 43 | 7.5 | 45 |
| 0 | 0 | 0 | 1 | 1 | 0 | 44 | 7.5 | 45 |
| 0 | 0 | 0 | 1 | 1 | 0 | 45 | 7.5 | 45 |
| 0 | 0 | 0 | 1 | 1 | 0 | 46 | 7.5 | 45 |
| 0 | 0 | 0 | 1 | 1 | 0 | 47 | 7.5 | 45 |
| 0 | 0 | 0 | 1 | 1 | 0 | 48 | 7.5 | 45 |
| 0 | 0 | 0 | 1 | 1 | 0 | 49 | 7.5 | 45 |
| 0 | 0 | 0 | 1 | 1 | 0 | 50 | 7.5 | 45 |
| 0 | 0 | 0 | 1 | 1 | 0 | 51 | 7.5 | 45 |
| 0 | 0 | 0 | 1 | 1 | 0 | 52 | 7.5 | 45 |
| 0 | 0 | 0 | 1 | 1 | 0 | 53 | 7.5 | 45 |
| 0 | 0 | 0 | 1 | 1 | 0 | 54 | 7.5 | 45 |
| 0 | 0 | 0 | 1 | 1 | 0 | 55 | 7.5 | 45 |
| 0 | 0 | 0 | 1 | 1 | 0 | 56 | 7.5 | 45 |
| 0 | 0 | 0 | 1 | 1 | 0 | 57 | 7.5 | 45 |
| 0 | 0 | 0 | 1 | 1 | 0 | 58 | 7.5 | 45 |
| 0 | 0 | 0 | 1 | 1 | 0 | 59 | 7.5 | 45 |
| 0 | 0 | 0 | 1 | 1 | 0 | 60 | 7.5 | 60 |
| 0 | 0 | 0 | 1 | 1 | 0 | 61 | 7.5 | 75 |
| 0 | 0 | 0 | 1 | 1 | 0 | 62 | 7.5 | 75 |
| 0 | 0 | 0 | 1 | 1 | 0 | 63 | 7.5 | 75 |
| 0 | 0 | 0 | 1 | 1 | 0 | 64 | 7.5 | 75 |
| 0 | 0 | 0 | 1 | 1 | 0 | 65 | 7.5 | 75 |
| 0 | 0 | 0 | 1 | 1 | 0 | 66 | 7.5 | 75 |
| 0 | 0 | 0 | 1 | 1 | 0 | 67 | 7.5 | 75 |
| 0 | 0 | 0 | 1 | 1 | 0 | 68 | 7.5 | 75 |
| 0 | 0 | 0 | 1 | 1 | 0 | 69 | 7.5 | 75 |
| 0 | 0 | 0 | 1 | 1 | 0 | 70 | 7.5 | 75 |
| 0 | 0 | 0 | 1 | 1 | 0 | 71 | 7.5 | 75 |
| 0 | 0 | 0 | 1 | 1 | 0 | 72 | 7.5 | 75 |
| 0 | 0 | 0 | 1 | 1 | 0 | 73 | 7.5 | 75 |
| 0 | 0 | 0 | 1 | 1 | 0 | 74 | 7.5 | 75 |
| 0 | 0 | 0 | 1 | 1 | 0 | 75 | 7.5 | 75 |
| 0 | 0 | 0 | 1 | 1 | 0 | 76 | 7.5 | 75 |
| 0 | 0 | 0 | 1 | 1 | 0 | 77 | 7.5 | 75 |
| 0 | 0 | 0 | 1 | 1 | 0 | 78 | 7.5 | 75 |
| 0 | 0 | 0 | 1 | 1 | 0 | 79 | 7.5 | 75 |

|   |   |   |   |   |   |     |     |     |
|---|---|---|---|---|---|-----|-----|-----|
| 0 | 0 | 0 | 1 | 1 | 0 | 80  | 7.5 | 75  |
| 0 | 0 | 0 | 1 | 1 | 0 | 81  | 7.5 | 75  |
| 0 | 0 | 0 | 1 | 1 | 0 | 82  | 7.5 | 75  |
| 0 | 0 | 0 | 1 | 1 | 0 | 83  | 7.5 | 75  |
| 0 | 0 | 0 | 1 | 1 | 0 | 84  | 7.5 | 75  |
| 0 | 0 | 0 | 1 | 1 | 0 | 85  | 7.5 | 75  |
| 0 | 0 | 0 | 1 | 1 | 0 | 86  | 7.5 | 75  |
| 0 | 0 | 0 | 1 | 1 | 0 | 87  | 7.5 | 75  |
| 0 | 0 | 0 | 1 | 1 | 0 | 88  | 7.5 | 75  |
| 0 | 0 | 0 | 1 | 1 | 0 | 89  | 7.5 | 75  |
| 0 | 0 | 0 | 1 | 1 | 0 | 90  | 7.5 | 75  |
| 0 | 0 | 0 | 1 | 1 | 0 | 91  | 7.5 | 75  |
| 0 | 0 | 0 | 1 | 1 | 0 | 92  | 7.5 | 75  |
| 0 | 0 | 0 | 1 | 1 | 0 | 93  | 7.5 | 75  |
| 0 | 0 | 0 | 1 | 1 | 0 | 94  | 7.5 | 75  |
| 0 | 0 | 0 | 1 | 1 | 0 | 95  | 7.5 | 75  |
| 0 | 0 | 0 | 1 | 1 | 0 | 96  | 7.5 | 75  |
| 0 | 0 | 0 | 1 | 1 | 0 | 97  | 7.5 | 75  |
| 0 | 0 | 0 | 1 | 1 | 0 | 98  | 7.5 | 75  |
| 0 | 0 | 0 | 1 | 1 | 0 | 99  | 7.5 | 75  |
| 0 | 0 | 0 | 1 | 1 | 0 | 100 | 7.5 | 75  |
| 0 | 0 | 0 | 1 | 1 | 0 | 101 | 7.5 | 75  |
| 0 | 0 | 0 | 1 | 1 | 0 | 102 | 7.5 | 75  |
| 0 | 0 | 0 | 1 | 1 | 0 | 103 | 7.5 | 75  |
| 0 | 0 | 0 | 1 | 1 | 0 | 104 | 7.5 | 75  |
| 0 | 0 | 0 | 1 | 1 | 0 | 105 | 7.5 | 75  |
| 0 | 0 | 0 | 1 | 1 | 0 | 106 | 7.5 | 75  |
| 0 | 0 | 0 | 1 | 1 | 0 | 107 | 7.5 | 75  |
| 0 | 0 | 0 | 1 | 1 | 0 | 108 | 7.5 | 75  |
| 0 | 0 | 0 | 1 | 1 | 0 | 109 | 7.5 | 75  |
| 0 | 0 | 0 | 1 | 1 | 0 | 110 | 7.5 | 75  |
| 0 | 0 | 0 | 1 | 1 | 0 | 111 | 7.5 | 75  |
| 0 | 0 | 0 | 1 | 1 | 0 | 112 | 7.5 | 75  |
| 0 | 0 | 0 | 1 | 1 | 0 | 113 | 7.5 | 75  |
| 0 | 0 | 0 | 1 | 1 | 0 | 114 | 7.5 | 75  |
| 0 | 0 | 0 | 1 | 1 | 0 | 115 | 7.5 | 75  |
| 0 | 0 | 0 | 1 | 1 | 0 | 116 | 7.5 | 75  |
| 0 | 0 | 0 | 1 | 1 | 0 | 117 | 7.5 | 75  |
| 0 | 0 | 0 | 1 | 1 | 0 | 118 | 7.5 | 75  |
| 0 | 0 | 0 | 1 | 1 | 0 | 119 | 7.5 | 75  |
| 0 | 0 | 0 | 1 | 1 | 0 | 120 | 7.5 | 165 |
| 0 | 0 | 0 | 1 | 1 | 0 | 121 | 7.5 | 165 |
| 0 | 0 | 0 | 1 | 1 | 0 | 122 | 7.5 | 165 |
| 0 | 0 | 0 | 1 | 1 | 0 | 123 | 7.5 | 165 |
| 0 | 0 | 0 | 1 | 1 | 0 | 124 | 7.5 | 165 |
| 0 | 0 | 0 | 1 | 1 | 0 | 125 | 7.5 | 165 |

|   |   |   |   |   |   |     |     |     |
|---|---|---|---|---|---|-----|-----|-----|
| 0 | 0 | 0 | 1 | 1 | 0 | 126 | 7.5 | 165 |
| 0 | 0 | 0 | 1 | 1 | 0 | 127 | 7.5 | 165 |
| 0 | 0 | 0 | 1 | 1 | 0 | 128 | 7.5 | 165 |
| 0 | 0 | 0 | 1 | 1 | 0 | 129 | 7.5 | 165 |
| 0 | 0 | 0 | 1 | 1 | 0 | 130 | 7.5 | 165 |
| 0 | 0 | 0 | 1 | 1 | 0 | 131 | 7.5 | 165 |
| 0 | 0 | 0 | 1 | 1 | 0 | 132 | 7.5 | 165 |
| 0 | 0 | 0 | 1 | 1 | 0 | 133 | 7.5 | 165 |
| 0 | 0 | 0 | 1 | 1 | 0 | 134 | 7.5 | 165 |
| 0 | 0 | 0 | 1 | 1 | 0 | 135 | 7.5 | 165 |
| 0 | 0 | 0 | 1 | 1 | 0 | 136 | 7.5 | 165 |
| 0 | 0 | 0 | 1 | 1 | 0 | 137 | 7.5 | 165 |
| 0 | 0 | 0 | 1 | 1 | 0 | 138 | 7.5 | 165 |
| 0 | 0 | 0 | 1 | 1 | 0 | 139 | 7.5 | 165 |
| 0 | 0 | 0 | 1 | 1 | 0 | 140 | 7.5 | 165 |
| 0 | 0 | 0 | 1 | 1 | 0 | 141 | 7.5 | 165 |
| 0 | 0 | 0 | 1 | 1 | 0 | 142 | 7.5 | 165 |
| 0 | 0 | 0 | 1 | 1 | 0 | 143 | 7.5 | 165 |
| 0 | 0 | 0 | 1 | 1 | 0 | 144 | 7.5 | 165 |
| 0 | 0 | 0 | 1 | 1 | 0 | 145 | 7.5 | 165 |
| 0 | 0 | 0 | 1 | 1 | 0 | 146 | 7.5 | 165 |
| 0 | 0 | 0 | 1 | 1 | 0 | 147 | 7.5 | 165 |
| 0 | 0 | 0 | 1 | 1 | 0 | 148 | 7.5 | 165 |
| 0 | 0 | 0 | 1 | 1 | 0 | 149 | 7.5 | 165 |
| 0 | 0 | 0 | 1 | 1 | 0 | 150 | 7.5 | 165 |
| 0 | 0 | 0 | 1 | 1 | 0 | 151 | 7.5 | 165 |
| 0 | 0 | 0 | 1 | 1 | 0 | 152 | 7.5 | 165 |
| 0 | 0 | 0 | 1 | 1 | 0 | 153 | 7.5 | 165 |
| 0 | 0 | 0 | 1 | 1 | 0 | 154 | 7.5 | 165 |
| 0 | 0 | 0 | 1 | 1 | 0 | 155 | 7.5 | 165 |
| 0 | 0 | 0 | 1 | 1 | 0 | 156 | 7.5 | 165 |
| 0 | 0 | 0 | 1 | 1 | 0 | 157 | 7.5 | 165 |
| 0 | 0 | 0 | 1 | 1 | 0 | 158 | 7.5 | 165 |
| 0 | 0 | 0 | 1 | 1 | 0 | 159 | 7.5 | 165 |
| 0 | 0 | 0 | 1 | 1 | 0 | 160 | 7.5 | 165 |
| 0 | 0 | 0 | 1 | 1 | 0 | 161 | 7.5 | 165 |
| 0 | 0 | 0 | 1 | 1 | 0 | 162 | 7.5 | 165 |
| 0 | 0 | 0 | 1 | 1 | 0 | 163 | 7.5 | 165 |
| 0 | 0 | 0 | 1 | 1 | 0 | 164 | 7.5 | 165 |
| 0 | 0 | 0 | 1 | 1 | 0 | 165 | 7.5 | 165 |
| 0 | 0 | 0 | 1 | 1 | 0 | 166 | 7.5 | 165 |
| 0 | 0 | 0 | 1 | 1 | 0 | 167 | 7.5 | 165 |
| 0 | 0 | 0 | 1 | 1 | 0 | 168 | 7.5 | 165 |
| 0 | 0 | 0 | 1 | 1 | 0 | 169 | 7.5 | 165 |
| 0 | 0 | 0 | 1 | 1 | 0 | 170 | 7.5 | 165 |
| 0 | 0 | 0 | 1 | 1 | 0 | 171 | 7.5 | 165 |

|   |   |   |   |   |   |     |     |     |
|---|---|---|---|---|---|-----|-----|-----|
| 0 | 0 | 0 | 1 | 1 | 0 | 172 | 7.5 | 165 |
| 0 | 0 | 0 | 1 | 1 | 0 | 173 | 7.5 | 165 |
| 0 | 0 | 0 | 1 | 1 | 0 | 174 | 7.5 | 165 |
| 0 | 0 | 0 | 1 | 1 | 0 | 175 | 7.5 | 165 |
| 0 | 0 | 0 | 1 | 1 | 0 | 176 | 7.5 | 165 |
| 0 | 0 | 0 | 1 | 1 | 0 | 177 | 7.5 | 165 |
| 0 | 0 | 0 | 1 | 1 | 0 | 178 | 7.5 | 165 |
| 0 | 0 | 0 | 1 | 1 | 0 | 179 | 7.5 | 165 |
| 0 | 0 | 0 | 1 | 1 | 0 | 180 | 7.5 | 180 |
| 0 | 0 | 0 | 1 | 0 | 1 | 0   | 7.5 | 0   |
| 0 | 0 | 0 | 1 | 0 | 1 | 1   | 7.5 | 15  |
| 0 | 0 | 0 | 1 | 0 | 1 | 2   | 7.5 | 15  |
| 0 | 0 | 0 | 1 | 0 | 1 | 3   | 7.5 | 15  |
| 0 | 0 | 0 | 1 | 0 | 1 | 4   | 7.5 | 15  |
| 0 | 0 | 0 | 1 | 0 | 1 | 5   | 7.5 | 15  |
| 0 | 0 | 0 | 1 | 0 | 1 | 6   | 7.5 | 15  |
| 0 | 0 | 0 | 1 | 0 | 1 | 7   | 7.5 | 15  |
| 0 | 0 | 0 | 1 | 0 | 1 | 8   | 7.5 | 15  |
| 0 | 0 | 0 | 1 | 0 | 1 | 9   | 7.5 | 15  |
| 0 | 0 | 0 | 1 | 0 | 1 | 10  | 7.5 | 15  |
| 0 | 0 | 0 | 1 | 0 | 1 | 11  | 7.5 | 15  |
| 0 | 0 | 0 | 1 | 0 | 1 | 12  | 7.5 | 15  |
| 0 | 0 | 0 | 1 | 0 | 1 | 13  | 7.5 | 15  |
| 0 | 0 | 0 | 1 | 0 | 1 | 14  | 7.5 | 15  |
| 0 | 0 | 0 | 1 | 0 | 1 | 15  | 7.5 | 15  |
| 0 | 0 | 0 | 1 | 0 | 1 | 16  | 7.5 | 15  |
| 0 | 0 | 0 | 1 | 0 | 1 | 17  | 7.5 | 15  |
| 0 | 0 | 0 | 1 | 0 | 1 | 18  | 7.5 | 15  |
| 0 | 0 | 0 | 1 | 0 | 1 | 19  | 7.5 | 15  |
| 0 | 0 | 0 | 1 | 0 | 1 | 20  | 7.5 | 15  |
| 0 | 0 | 0 | 1 | 0 | 1 | 21  | 7.5 | 15  |
| 0 | 0 | 0 | 1 | 0 | 1 | 22  | 7.5 | 15  |
| 0 | 0 | 0 | 1 | 0 | 1 | 23  | 7.5 | 15  |
| 0 | 0 | 0 | 1 | 0 | 1 | 24  | 7.5 | 15  |
| 0 | 0 | 0 | 1 | 0 | 1 | 25  | 7.5 | 15  |
| 0 | 0 | 0 | 1 | 0 | 1 | 26  | 7.5 | 15  |
| 0 | 0 | 0 | 1 | 0 | 1 | 27  | 7.5 | 15  |
| 0 | 0 | 0 | 1 | 0 | 1 | 28  | 7.5 | 15  |
| 0 | 0 | 0 | 1 | 0 | 1 | 29  | 7.5 | 15  |
| 0 | 0 | 0 | 1 | 0 | 1 | 30  | 7.5 | 30  |
| 0 | 0 | 0 | 1 | 0 | 1 | 31  | 7.5 | 45  |
| 0 | 0 | 0 | 1 | 0 | 1 | 32  | 7.5 | 45  |
| 0 | 0 | 0 | 1 | 0 | 1 | 33  | 7.5 | 45  |
| 0 | 0 | 0 | 1 | 0 | 1 | 34  | 7.5 | 45  |
| 0 | 0 | 0 | 1 | 0 | 1 | 35  | 7.5 | 45  |
| 0 | 0 | 0 | 1 | 0 | 1 | 36  | 7.5 | 45  |

|   |   |   |   |   |   |    |     |    |
|---|---|---|---|---|---|----|-----|----|
| 0 | 0 | 0 | 1 | 0 | 1 | 37 | 7.5 | 45 |
| 0 | 0 | 0 | 1 | 0 | 1 | 38 | 7.5 | 45 |
| 0 | 0 | 0 | 1 | 0 | 1 | 39 | 7.5 | 45 |
| 0 | 0 | 0 | 1 | 0 | 1 | 40 | 7.5 | 45 |
| 0 | 0 | 0 | 1 | 0 | 1 | 41 | 7.5 | 45 |
| 0 | 0 | 0 | 1 | 0 | 1 | 42 | 7.5 | 45 |
| 0 | 0 | 0 | 1 | 0 | 1 | 43 | 7.5 | 45 |
| 0 | 0 | 0 | 1 | 0 | 1 | 44 | 7.5 | 45 |
| 0 | 0 | 0 | 1 | 0 | 1 | 45 | 7.5 | 45 |
| 0 | 0 | 0 | 1 | 0 | 1 | 46 | 7.5 | 45 |
| 0 | 0 | 0 | 1 | 0 | 1 | 47 | 7.5 | 45 |
| 0 | 0 | 0 | 1 | 0 | 1 | 48 | 7.5 | 45 |
| 0 | 0 | 0 | 1 | 0 | 1 | 49 | 7.5 | 45 |
| 0 | 0 | 0 | 1 | 0 | 1 | 50 | 7.5 | 45 |
| 0 | 0 | 0 | 1 | 0 | 1 | 51 | 7.5 | 45 |
| 0 | 0 | 0 | 1 | 0 | 1 | 52 | 7.5 | 45 |
| 0 | 0 | 0 | 1 | 0 | 1 | 53 | 7.5 | 45 |
| 0 | 0 | 0 | 1 | 0 | 1 | 54 | 7.5 | 45 |
| 0 | 0 | 0 | 1 | 0 | 1 | 55 | 7.5 | 45 |
| 0 | 0 | 0 | 1 | 0 | 1 | 56 | 7.5 | 45 |
| 0 | 0 | 0 | 1 | 0 | 1 | 57 | 7.5 | 45 |
| 0 | 0 | 0 | 1 | 0 | 1 | 58 | 7.5 | 45 |
| 0 | 0 | 0 | 1 | 0 | 1 | 59 | 7.5 | 45 |
| 0 | 0 | 0 | 1 | 0 | 1 | 60 | 7.5 | 60 |
| 0 | 0 | 0 | 1 | 0 | 1 | 61 | 7.5 | 75 |
| 0 | 0 | 0 | 1 | 0 | 1 | 62 | 7.5 | 75 |
| 0 | 0 | 0 | 1 | 0 | 1 | 63 | 7.5 | 75 |
| 0 | 0 | 0 | 1 | 0 | 1 | 64 | 7.5 | 75 |
| 0 | 0 | 0 | 1 | 0 | 1 | 65 | 7.5 | 75 |
| 0 | 0 | 0 | 1 | 0 | 1 | 66 | 7.5 | 75 |
| 0 | 0 | 0 | 1 | 0 | 1 | 67 | 7.5 | 75 |
| 0 | 0 | 0 | 1 | 0 | 1 | 68 | 7.5 | 75 |
| 0 | 0 | 0 | 1 | 0 | 1 | 69 | 7.5 | 75 |
| 0 | 0 | 0 | 1 | 0 | 1 | 70 | 7.5 | 75 |
| 0 | 0 | 0 | 1 | 0 | 1 | 71 | 7.5 | 75 |
| 0 | 0 | 0 | 1 | 0 | 1 | 72 | 7.5 | 75 |
| 0 | 0 | 0 | 1 | 0 | 1 | 73 | 7.5 | 75 |
| 0 | 0 | 0 | 1 | 0 | 1 | 74 | 7.5 | 75 |
| 0 | 0 | 0 | 1 | 0 | 1 | 75 | 7.5 | 75 |
| 0 | 0 | 0 | 1 | 0 | 1 | 76 | 7.5 | 75 |
| 0 | 0 | 0 | 1 | 0 | 1 | 77 | 7.5 | 75 |
| 0 | 0 | 0 | 1 | 0 | 1 | 78 | 7.5 | 75 |
| 0 | 0 | 0 | 1 | 0 | 1 | 79 | 7.5 | 75 |
| 0 | 0 | 0 | 1 | 0 | 1 | 80 | 7.5 | 75 |
| 0 | 0 | 0 | 1 | 0 | 1 | 81 | 7.5 | 75 |
| 0 | 0 | 0 | 1 | 0 | 1 | 82 | 7.5 | 75 |

|   |   |   |   |   |   |     |     |     |
|---|---|---|---|---|---|-----|-----|-----|
| 0 | 0 | 0 | 1 | 0 | 1 | 83  | 7.5 | 75  |
| 0 | 0 | 0 | 1 | 0 | 1 | 84  | 7.5 | 75  |
| 0 | 0 | 0 | 1 | 0 | 1 | 85  | 7.5 | 75  |
| 0 | 0 | 0 | 1 | 0 | 1 | 86  | 7.5 | 75  |
| 0 | 0 | 0 | 1 | 0 | 1 | 87  | 7.5 | 75  |
| 0 | 0 | 0 | 1 | 0 | 1 | 88  | 7.5 | 75  |
| 0 | 0 | 0 | 1 | 0 | 1 | 89  | 7.5 | 75  |
| 0 | 0 | 0 | 1 | 0 | 1 | 90  | 7.5 | 90  |
| 0 | 0 | 0 | 1 | 0 | 1 | 91  | 7.5 | 75  |
| 0 | 0 | 0 | 1 | 0 | 1 | 92  | 7.5 | 75  |
| 0 | 0 | 0 | 1 | 0 | 1 | 93  | 7.5 | 75  |
| 0 | 0 | 0 | 1 | 0 | 1 | 94  | 7.5 | 75  |
| 0 | 0 | 0 | 1 | 0 | 1 | 95  | 7.5 | 75  |
| 0 | 0 | 0 | 1 | 0 | 1 | 96  | 7.5 | 75  |
| 0 | 0 | 0 | 1 | 0 | 1 | 97  | 7.5 | 75  |
| 0 | 0 | 0 | 1 | 0 | 1 | 98  | 7.5 | 75  |
| 0 | 0 | 0 | 1 | 0 | 1 | 99  | 7.5 | 75  |
| 0 | 0 | 0 | 1 | 0 | 1 | 100 | 7.5 | 75  |
| 0 | 0 | 0 | 1 | 0 | 1 | 101 | 7.5 | 75  |
| 0 | 0 | 0 | 1 | 0 | 1 | 102 | 7.5 | 75  |
| 0 | 0 | 0 | 1 | 0 | 1 | 103 | 7.5 | 75  |
| 0 | 0 | 0 | 1 | 0 | 1 | 104 | 7.5 | 75  |
| 0 | 0 | 0 | 1 | 0 | 1 | 105 | 7.5 | 75  |
| 0 | 0 | 0 | 1 | 0 | 1 | 106 | 7.5 | 135 |
| 0 | 0 | 0 | 1 | 0 | 1 | 107 | 7.5 | 135 |
| 0 | 0 | 0 | 1 | 0 | 1 | 108 | 7.5 | 135 |
| 0 | 0 | 0 | 1 | 0 | 1 | 109 | 7.5 | 135 |
| 0 | 0 | 0 | 1 | 0 | 1 | 110 | 7.5 | 135 |
| 0 | 0 | 0 | 1 | 0 | 1 | 111 | 7.5 | 135 |
| 0 | 0 | 0 | 1 | 0 | 1 | 112 | 7.5 | 135 |
| 0 | 0 | 0 | 1 | 0 | 1 | 113 | 7.5 | 135 |
| 0 | 0 | 0 | 1 | 0 | 1 | 114 | 7.5 | 135 |
| 0 | 0 | 0 | 1 | 0 | 1 | 115 | 7.5 | 135 |
| 0 | 0 | 0 | 1 | 0 | 1 | 116 | 7.5 | 135 |
| 0 | 0 | 0 | 1 | 0 | 1 | 117 | 7.5 | 135 |
| 0 | 0 | 0 | 1 | 0 | 1 | 118 | 7.5 | 135 |
| 0 | 0 | 0 | 1 | 0 | 1 | 119 | 7.5 | 135 |
| 0 | 0 | 0 | 1 | 0 | 1 | 120 | 7.5 | 135 |
| 0 | 0 | 0 | 1 | 0 | 1 | 121 | 7.5 | 135 |
| 0 | 0 | 0 | 1 | 0 | 1 | 122 | 7.5 | 135 |
| 0 | 0 | 0 | 1 | 0 | 1 | 123 | 7.5 | 135 |
| 0 | 0 | 0 | 1 | 0 | 1 | 124 | 7.5 | 135 |
| 0 | 0 | 0 | 1 | 0 | 1 | 125 | 7.5 | 135 |
| 0 | 0 | 0 | 1 | 0 | 1 | 126 | 7.5 | 135 |
| 0 | 0 | 0 | 1 | 0 | 1 | 127 | 7.5 | 135 |
| 0 | 0 | 0 | 1 | 0 | 1 | 128 | 7.5 | 135 |

|   |   |   |   |   |   |     |     |     |
|---|---|---|---|---|---|-----|-----|-----|
| 0 | 0 | 0 | 1 | 0 | 1 | 129 | 7.5 | 135 |
| 0 | 0 | 0 | 1 | 0 | 1 | 130 | 7.5 | 135 |
| 0 | 0 | 0 | 1 | 0 | 1 | 131 | 7.5 | 135 |
| 0 | 0 | 0 | 1 | 0 | 1 | 132 | 7.5 | 135 |
| 0 | 0 | 0 | 1 | 0 | 1 | 133 | 7.5 | 135 |
| 0 | 0 | 0 | 1 | 0 | 1 | 134 | 7.5 | 135 |
| 0 | 0 | 0 | 1 | 0 | 1 | 135 | 7.5 | 135 |
| 0 | 0 | 0 | 1 | 0 | 1 | 136 | 7.5 | 135 |
| 0 | 0 | 0 | 1 | 0 | 1 | 137 | 7.5 | 135 |
| 0 | 0 | 0 | 1 | 0 | 1 | 138 | 7.5 | 135 |
| 0 | 0 | 0 | 1 | 0 | 1 | 139 | 7.5 | 135 |
| 0 | 0 | 0 | 1 | 0 | 1 | 140 | 7.5 | 135 |
| 0 | 0 | 0 | 1 | 0 | 1 | 141 | 7.5 | 135 |
| 0 | 0 | 0 | 1 | 0 | 1 | 142 | 7.5 | 135 |
| 0 | 0 | 0 | 1 | 0 | 1 | 143 | 7.5 | 135 |
| 0 | 0 | 0 | 1 | 0 | 1 | 144 | 7.5 | 135 |
| 0 | 0 | 0 | 1 | 0 | 1 | 145 | 7.5 | 135 |
| 0 | 0 | 0 | 1 | 0 | 1 | 146 | 7.5 | 135 |
| 0 | 0 | 0 | 1 | 0 | 1 | 147 | 7.5 | 135 |
| 0 | 0 | 0 | 1 | 0 | 1 | 148 | 7.5 | 135 |
| 0 | 0 | 0 | 1 | 0 | 1 | 149 | 7.5 | 135 |
| 0 | 0 | 0 | 1 | 0 | 1 | 150 | 7.5 | 135 |
| 0 | 0 | 0 | 1 | 0 | 1 | 151 | 7.5 | 135 |
| 0 | 0 | 0 | 1 | 0 | 1 | 152 | 7.5 | 135 |
| 0 | 0 | 0 | 1 | 0 | 1 | 153 | 7.5 | 135 |
| 0 | 0 | 0 | 1 | 0 | 1 | 154 | 7.5 | 135 |
| 0 | 0 | 0 | 1 | 0 | 1 | 155 | 7.5 | 135 |
| 0 | 0 | 0 | 1 | 0 | 1 | 156 | 7.5 | 135 |
| 0 | 0 | 0 | 1 | 0 | 1 | 157 | 7.5 | 135 |
| 0 | 0 | 0 | 1 | 0 | 1 | 158 | 7.5 | 135 |
| 0 | 0 | 0 | 1 | 0 | 1 | 159 | 7.5 | 135 |
| 0 | 0 | 0 | 1 | 0 | 1 | 160 | 7.5 | 135 |
| 0 | 0 | 0 | 1 | 0 | 1 | 161 | 7.5 | 135 |
| 0 | 0 | 0 | 1 | 0 | 1 | 162 | 7.5 | 135 |
| 0 | 0 | 0 | 1 | 0 | 1 | 163 | 7.5 | 135 |
| 0 | 0 | 0 | 1 | 0 | 1 | 164 | 7.5 | 135 |
| 0 | 0 | 0 | 1 | 0 | 1 | 165 | 7.5 | 135 |
| 0 | 0 | 0 | 1 | 0 | 1 | 166 | 7.5 | 135 |
| 0 | 0 | 0 | 1 | 0 | 1 | 167 | 7.5 | 135 |
| 0 | 0 | 0 | 1 | 0 | 1 | 168 | 7.5 | 135 |
| 0 | 0 | 0 | 1 | 0 | 1 | 169 | 7.5 | 135 |
| 0 | 0 | 0 | 1 | 0 | 1 | 170 | 7.5 | 135 |
| 0 | 0 | 0 | 1 | 0 | 1 | 171 | 7.5 | 135 |
| 0 | 0 | 0 | 1 | 0 | 1 | 172 | 7.5 | 135 |
| 0 | 0 | 0 | 1 | 0 | 1 | 173 | 7.5 | 135 |
| 0 | 0 | 0 | 1 | 0 | 1 | 174 | 7.5 | 135 |

|   |   |   |   |   |   |     |     |     |
|---|---|---|---|---|---|-----|-----|-----|
| 0 | 0 | 0 | 1 | 0 | 1 | 175 | 7.5 | 135 |
| 0 | 0 | 0 | 1 | 0 | 1 | 176 | 7.5 | 135 |
| 0 | 0 | 0 | 1 | 0 | 1 | 177 | 7.5 | 135 |
| 0 | 0 | 0 | 1 | 0 | 1 | 178 | 7.5 | 135 |
| 0 | 0 | 0 | 1 | 0 | 1 | 179 | 7.5 | 135 |
| 0 | 0 | 0 | 1 | 0 | 1 | 180 | 7.5 | 135 |
| 0 | 0 | 0 | 0 | 1 | 1 | 0   | 7.5 | 0   |
| 0 | 0 | 0 | 0 | 1 | 1 | 1   | 7.5 | 15  |
| 0 | 0 | 0 | 0 | 1 | 1 | 2   | 7.5 | 15  |
| 0 | 0 | 0 | 0 | 1 | 1 | 3   | 7.5 | 15  |
| 0 | 0 | 0 | 0 | 1 | 1 | 4   | 7.5 | 15  |
| 0 | 0 | 0 | 0 | 1 | 1 | 5   | 7.5 | 15  |
| 0 | 0 | 0 | 0 | 1 | 1 | 6   | 7.5 | 15  |
| 0 | 0 | 0 | 0 | 1 | 1 | 7   | 7.5 | 15  |
| 0 | 0 | 0 | 0 | 1 | 1 | 8   | 7.5 | 15  |
| 0 | 0 | 0 | 0 | 1 | 1 | 9   | 7.5 | 15  |
| 0 | 0 | 0 | 0 | 1 | 1 | 10  | 7.5 | 15  |
| 0 | 0 | 0 | 0 | 1 | 1 | 11  | 7.5 | 15  |
| 0 | 0 | 0 | 0 | 1 | 1 | 12  | 7.5 | 15  |
| 0 | 0 | 0 | 0 | 1 | 1 | 13  | 7.5 | 15  |
| 0 | 0 | 0 | 0 | 1 | 1 | 14  | 7.5 | 15  |
| 0 | 0 | 0 | 0 | 1 | 1 | 15  | 7.5 | 15  |
| 0 | 0 | 0 | 0 | 1 | 1 | 16  | 7.5 | 15  |
| 0 | 0 | 0 | 0 | 1 | 1 | 17  | 7.5 | 15  |
| 0 | 0 | 0 | 0 | 1 | 1 | 18  | 7.5 | 15  |
| 0 | 0 | 0 | 0 | 1 | 1 | 19  | 7.5 | 15  |
| 0 | 0 | 0 | 0 | 1 | 1 | 20  | 7.5 | 15  |
| 0 | 0 | 0 | 0 | 1 | 1 | 21  | 7.5 | 15  |
| 0 | 0 | 0 | 0 | 1 | 1 | 22  | 7.5 | 15  |
| 0 | 0 | 0 | 0 | 1 | 1 | 23  | 7.5 | 15  |
| 0 | 0 | 0 | 0 | 1 | 1 | 24  | 7.5 | 15  |
| 0 | 0 | 0 | 0 | 1 | 1 | 25  | 7.5 | 15  |
| 0 | 0 | 0 | 0 | 1 | 1 | 26  | 7.5 | 15  |
| 0 | 0 | 0 | 0 | 1 | 1 | 27  | 7.5 | 15  |
| 0 | 0 | 0 | 0 | 1 | 1 | 28  | 7.5 | 15  |
| 0 | 0 | 0 | 0 | 1 | 1 | 29  | 7.5 | 15  |
| 0 | 0 | 0 | 0 | 1 | 1 | 30  | 7.5 | 30  |
| 0 | 0 | 0 | 0 | 1 | 1 | 31  | 7.5 | 45  |
| 0 | 0 | 0 | 0 | 1 | 1 | 32  | 7.5 | 45  |
| 0 | 0 | 0 | 0 | 1 | 1 | 33  | 7.5 | 45  |
| 0 | 0 | 0 | 0 | 1 | 1 | 34  | 7.5 | 45  |
| 0 | 0 | 0 | 0 | 1 | 1 | 35  | 7.5 | 45  |
| 0 | 0 | 0 | 0 | 1 | 1 | 36  | 7.5 | 45  |
| 0 | 0 | 0 | 0 | 1 | 1 | 37  | 7.5 | 45  |
| 0 | 0 | 0 | 0 | 1 | 1 | 38  | 7.5 | 45  |
| 0 | 0 | 0 | 0 | 1 | 1 | 39  | 7.5 | 45  |

|   |   |   |   |   |   |    |     |    |
|---|---|---|---|---|---|----|-----|----|
| 0 | 0 | 0 | 0 | 1 | 1 | 40 | 7.5 | 45 |
| 0 | 0 | 0 | 0 | 1 | 1 | 41 | 7.5 | 45 |
| 0 | 0 | 0 | 0 | 1 | 1 | 42 | 7.5 | 45 |
| 0 | 0 | 0 | 0 | 1 | 1 | 43 | 7.5 | 45 |
| 0 | 0 | 0 | 0 | 1 | 1 | 44 | 7.5 | 45 |
| 0 | 0 | 0 | 0 | 1 | 1 | 45 | 7.5 | 45 |
| 0 | 0 | 0 | 0 | 1 | 1 | 46 | 7.5 | 45 |
| 0 | 0 | 0 | 0 | 1 | 1 | 47 | 7.5 | 45 |
| 0 | 0 | 0 | 0 | 1 | 1 | 48 | 7.5 | 45 |
| 0 | 0 | 0 | 0 | 1 | 1 | 49 | 7.5 | 45 |
| 0 | 0 | 0 | 0 | 1 | 1 | 50 | 7.5 | 45 |
| 0 | 0 | 0 | 0 | 1 | 1 | 51 | 7.5 | 45 |
| 0 | 0 | 0 | 0 | 1 | 1 | 52 | 7.5 | 45 |
| 0 | 0 | 0 | 0 | 1 | 1 | 53 | 7.5 | 45 |
| 0 | 0 | 0 | 0 | 1 | 1 | 54 | 7.5 | 45 |
| 0 | 0 | 0 | 0 | 1 | 1 | 55 | 7.5 | 45 |
| 0 | 0 | 0 | 0 | 1 | 1 | 56 | 7.5 | 45 |
| 0 | 0 | 0 | 0 | 1 | 1 | 57 | 7.5 | 45 |
| 0 | 0 | 0 | 0 | 1 | 1 | 58 | 7.5 | 45 |
| 0 | 0 | 0 | 0 | 1 | 1 | 59 | 7.5 | 45 |
| 0 | 0 | 0 | 0 | 1 | 1 | 60 | 7.5 | 60 |
| 0 | 0 | 0 | 0 | 1 | 1 | 61 | 7.5 | 75 |
| 0 | 0 | 0 | 0 | 1 | 1 | 62 | 7.5 | 75 |
| 0 | 0 | 0 | 0 | 1 | 1 | 63 | 7.5 | 75 |
| 0 | 0 | 0 | 0 | 1 | 1 | 64 | 7.5 | 75 |
| 0 | 0 | 0 | 0 | 1 | 1 | 65 | 7.5 | 75 |
| 0 | 0 | 0 | 0 | 1 | 1 | 66 | 7.5 | 75 |
| 0 | 0 | 0 | 0 | 1 | 1 | 67 | 7.5 | 75 |
| 0 | 0 | 0 | 0 | 1 | 1 | 68 | 7.5 | 75 |
| 0 | 0 | 0 | 0 | 1 | 1 | 69 | 7.5 | 75 |
| 0 | 0 | 0 | 0 | 1 | 1 | 70 | 7.5 | 75 |
| 0 | 0 | 0 | 0 | 1 | 1 | 71 | 7.5 | 75 |
| 0 | 0 | 0 | 0 | 1 | 1 | 72 | 7.5 | 75 |
| 0 | 0 | 0 | 0 | 1 | 1 | 73 | 7.5 | 75 |
| 0 | 0 | 0 | 0 | 1 | 1 | 74 | 7.5 | 75 |
| 0 | 0 | 0 | 0 | 1 | 1 | 75 | 7.5 | 75 |
| 0 | 0 | 0 | 0 | 1 | 1 | 76 | 7.5 | 75 |
| 0 | 0 | 0 | 0 | 1 | 1 | 77 | 7.5 | 75 |
| 0 | 0 | 0 | 0 | 1 | 1 | 78 | 7.5 | 75 |
| 0 | 0 | 0 | 0 | 1 | 1 | 79 | 7.5 | 75 |
| 0 | 0 | 0 | 0 | 1 | 1 | 80 | 7.5 | 75 |
| 0 | 0 | 0 | 0 | 1 | 1 | 81 | 7.5 | 75 |
| 0 | 0 | 0 | 0 | 1 | 1 | 82 | 7.5 | 75 |
| 0 | 0 | 0 | 0 | 1 | 1 | 83 | 7.5 | 75 |
| 0 | 0 | 0 | 0 | 1 | 1 | 84 | 7.5 | 75 |
| 0 | 0 | 0 | 0 | 1 | 1 | 85 | 7.5 | 75 |

|   |   |   |   |   |   |     |     |     |
|---|---|---|---|---|---|-----|-----|-----|
| 0 | 0 | 0 | 0 | 1 | 1 | 86  | 7.5 | 75  |
| 0 | 0 | 0 | 0 | 1 | 1 | 87  | 7.5 | 75  |
| 0 | 0 | 0 | 0 | 1 | 1 | 88  | 7.5 | 75  |
| 0 | 0 | 0 | 0 | 1 | 1 | 89  | 7.5 | 75  |
| 0 | 0 | 0 | 0 | 1 | 1 | 90  | 7.5 | 90  |
| 0 | 0 | 0 | 0 | 1 | 1 | 91  | 7.5 | 105 |
| 0 | 0 | 0 | 0 | 1 | 1 | 92  | 7.5 | 105 |
| 0 | 0 | 0 | 0 | 1 | 1 | 93  | 7.5 | 105 |
| 0 | 0 | 0 | 0 | 1 | 1 | 94  | 7.5 | 105 |
| 0 | 0 | 0 | 0 | 1 | 1 | 95  | 7.5 | 105 |
| 0 | 0 | 0 | 0 | 1 | 1 | 96  | 7.5 | 105 |
| 0 | 0 | 0 | 0 | 1 | 1 | 97  | 7.5 | 105 |
| 0 | 0 | 0 | 0 | 1 | 1 | 98  | 7.5 | 105 |
| 0 | 0 | 0 | 0 | 1 | 1 | 99  | 7.5 | 105 |
| 0 | 0 | 0 | 0 | 1 | 1 | 100 | 7.5 | 105 |
| 0 | 0 | 0 | 0 | 1 | 1 | 101 | 7.5 | 105 |
| 0 | 0 | 0 | 0 | 1 | 1 | 102 | 7.5 | 105 |
| 0 | 0 | 0 | 0 | 1 | 1 | 103 | 7.5 | 105 |
| 0 | 0 | 0 | 0 | 1 | 1 | 104 | 7.5 | 105 |
| 0 | 0 | 0 | 0 | 1 | 1 | 105 | 7.5 | 105 |
| 0 | 0 | 0 | 0 | 1 | 1 | 106 | 7.5 | 105 |
| 0 | 0 | 0 | 0 | 1 | 1 | 107 | 7.5 | 105 |
| 0 | 0 | 0 | 0 | 1 | 1 | 108 | 7.5 | 105 |
| 0 | 0 | 0 | 0 | 1 | 1 | 109 | 7.5 | 105 |
| 0 | 0 | 0 | 0 | 1 | 1 | 110 | 7.5 | 105 |
| 0 | 0 | 0 | 0 | 1 | 1 | 111 | 7.5 | 105 |
| 0 | 0 | 0 | 0 | 1 | 1 | 112 | 7.5 | 105 |
| 0 | 0 | 0 | 0 | 1 | 1 | 113 | 7.5 | 105 |
| 0 | 0 | 0 | 0 | 1 | 1 | 114 | 7.5 | 105 |
| 0 | 0 | 0 | 0 | 1 | 1 | 115 | 7.5 | 105 |
| 0 | 0 | 0 | 0 | 1 | 1 | 116 | 7.5 | 105 |
| 0 | 0 | 0 | 0 | 1 | 1 | 117 | 7.5 | 105 |
| 0 | 0 | 0 | 0 | 1 | 1 | 118 | 7.5 | 105 |
| 0 | 0 | 0 | 0 | 1 | 1 | 119 | 7.5 | 105 |
| 0 | 0 | 0 | 0 | 1 | 1 | 120 | 7.5 | 105 |
| 0 | 0 | 0 | 0 | 1 | 1 | 121 | 7.5 | 105 |
| 0 | 0 | 0 | 0 | 1 | 1 | 122 | 7.5 | 105 |
| 0 | 0 | 0 | 0 | 1 | 1 | 123 | 7.5 | 105 |
| 0 | 0 | 0 | 0 | 1 | 1 | 124 | 7.5 | 105 |
| 0 | 0 | 0 | 0 | 1 | 1 | 125 | 7.5 | 105 |
| 0 | 0 | 0 | 0 | 1 | 1 | 126 | 7.5 | 105 |
| 0 | 0 | 0 | 0 | 1 | 1 | 127 | 7.5 | 105 |
| 0 | 0 | 0 | 0 | 1 | 1 | 128 | 7.5 | 105 |
| 0 | 0 | 0 | 0 | 1 | 1 | 129 | 7.5 | 105 |
| 0 | 0 | 0 | 0 | 1 | 1 | 130 | 7.5 | 105 |
| 0 | 0 | 0 | 0 | 1 | 1 | 131 | 7.5 | 105 |

|   |   |   |   |   |   |     |     |     |
|---|---|---|---|---|---|-----|-----|-----|
| 0 | 0 | 0 | 0 | 1 | 1 | 132 | 7.5 | 105 |
| 0 | 0 | 0 | 0 | 1 | 1 | 133 | 7.5 | 105 |
| 0 | 0 | 0 | 0 | 1 | 1 | 134 | 7.5 | 105 |
| 0 | 0 | 0 | 0 | 1 | 1 | 135 | 7.5 | 105 |
| 0 | 0 | 0 | 0 | 1 | 1 | 136 | 7.5 | 105 |
| 0 | 0 | 0 | 0 | 1 | 1 | 137 | 7.5 | 105 |
| 0 | 0 | 0 | 0 | 1 | 1 | 138 | 7.5 | 105 |
| 0 | 0 | 0 | 0 | 1 | 1 | 139 | 7.5 | 105 |
| 0 | 0 | 0 | 0 | 1 | 1 | 140 | 7.5 | 105 |
| 0 | 0 | 0 | 0 | 1 | 1 | 141 | 7.5 | 105 |
| 0 | 0 | 0 | 0 | 1 | 1 | 142 | 7.5 | 105 |
| 0 | 0 | 0 | 0 | 1 | 1 | 143 | 7.5 | 105 |
| 0 | 0 | 0 | 0 | 1 | 1 | 144 | 7.5 | 105 |
| 0 | 0 | 0 | 0 | 1 | 1 | 145 | 7.5 | 105 |
| 0 | 0 | 0 | 0 | 1 | 1 | 146 | 7.5 | 105 |
| 0 | 0 | 0 | 0 | 1 | 1 | 147 | 7.5 | 105 |
| 0 | 0 | 0 | 0 | 1 | 1 | 148 | 7.5 | 105 |
| 0 | 0 | 0 | 0 | 1 | 1 | 149 | 7.5 | 105 |
| 0 | 0 | 0 | 0 | 1 | 1 | 150 | 7.5 | 105 |
| 0 | 0 | 0 | 0 | 1 | 1 | 151 | 7.5 | 105 |
| 0 | 0 | 0 | 0 | 1 | 1 | 152 | 7.5 | 105 |
| 0 | 0 | 0 | 0 | 1 | 1 | 153 | 7.5 | 105 |
| 0 | 0 | 0 | 0 | 1 | 1 | 154 | 7.5 | 105 |
| 0 | 0 | 0 | 0 | 1 | 1 | 155 | 7.5 | 105 |
| 0 | 0 | 0 | 0 | 1 | 1 | 156 | 7.5 | 105 |
| 0 | 0 | 0 | 0 | 1 | 1 | 157 | 7.5 | 105 |
| 0 | 0 | 0 | 0 | 1 | 1 | 158 | 7.5 | 105 |
| 0 | 0 | 0 | 0 | 1 | 1 | 159 | 7.5 | 105 |
| 0 | 0 | 0 | 0 | 1 | 1 | 160 | 7.5 | 105 |
| 0 | 0 | 0 | 0 | 1 | 1 | 161 | 7.5 | 105 |
| 0 | 0 | 0 | 0 | 1 | 1 | 162 | 7.5 | 105 |
| 0 | 0 | 0 | 0 | 1 | 1 | 163 | 7.5 | 105 |
| 0 | 0 | 0 | 0 | 1 | 1 | 164 | 7.5 | 105 |
| 0 | 0 | 0 | 0 | 1 | 1 | 165 | 7.5 | 105 |
| 0 | 0 | 0 | 0 | 1 | 1 | 166 | 7.5 | 105 |
| 0 | 0 | 0 | 0 | 1 | 1 | 167 | 7.5 | 105 |
| 0 | 0 | 0 | 0 | 1 | 1 | 168 | 7.5 | 105 |
| 0 | 0 | 0 | 0 | 1 | 1 | 169 | 7.5 | 105 |
| 0 | 0 | 0 | 0 | 1 | 1 | 170 | 7.5 | 105 |
| 0 | 0 | 0 | 0 | 1 | 1 | 171 | 7.5 | 105 |
| 0 | 0 | 0 | 0 | 1 | 1 | 172 | 7.5 | 105 |
| 0 | 0 | 0 | 0 | 1 | 1 | 173 | 7.5 | 105 |
| 0 | 0 | 0 | 0 | 1 | 1 | 174 | 7.5 | 105 |
| 0 | 0 | 0 | 0 | 1 | 1 | 175 | 7.5 | 105 |
| 0 | 0 | 0 | 0 | 1 | 1 | 176 | 7.5 | 105 |
| 0 | 0 | 0 | 0 | 1 | 1 | 177 | 7.5 | 105 |

|   |   |   |   |   |   |     |     |     |
|---|---|---|---|---|---|-----|-----|-----|
| 0 | 0 | 0 | 0 | 1 | 1 | 178 | 7.5 | 105 |
| 0 | 0 | 0 | 0 | 1 | 1 | 179 | 7.5 | 105 |
| 0 | 0 | 0 | 0 | 1 | 1 | 180 | 7.5 | 105 |
| 0 | 1 | 1 | 1 | 0 | 0 | 0   | 7.5 | 0   |
| 0 | 1 | 1 | 1 | 0 | 0 | 1   | 7.5 | 15  |
| 0 | 1 | 1 | 1 | 0 | 0 | 2   | 7.5 | 15  |
| 0 | 1 | 1 | 1 | 0 | 0 | 3   | 7.5 | 15  |
| 0 | 1 | 1 | 1 | 0 | 0 | 4   | 7.5 | 15  |
| 0 | 1 | 1 | 1 | 0 | 0 | 5   | 7.5 | 15  |
| 0 | 1 | 1 | 1 | 0 | 0 | 6   | 7.5 | 15  |
| 0 | 1 | 1 | 1 | 0 | 0 | 7   | 7.5 | 15  |
| 0 | 1 | 1 | 1 | 0 | 0 | 8   | 7.5 | 15  |
| 0 | 1 | 1 | 1 | 0 | 0 | 9   | 7.5 | 15  |
| 0 | 1 | 1 | 1 | 0 | 0 | 10  | 7.5 | 15  |
| 0 | 1 | 1 | 1 | 0 | 0 | 11  | 7.5 | 15  |
| 0 | 1 | 1 | 1 | 0 | 0 | 12  | 7.5 | 15  |
| 0 | 1 | 1 | 1 | 0 | 0 | 13  | 7.5 | 15  |
| 0 | 1 | 1 | 1 | 0 | 0 | 14  | 7.5 | 15  |
| 0 | 1 | 1 | 1 | 0 | 0 | 15  | 7.5 | 15  |
| 0 | 1 | 1 | 1 | 0 | 0 | 16  | 7.5 | 15  |
| 0 | 1 | 1 | 1 | 0 | 0 | 17  | 7.5 | 15  |
| 0 | 1 | 1 | 1 | 0 | 0 | 18  | 7.5 | 15  |
| 0 | 1 | 1 | 1 | 0 | 0 | 19  | 7.5 | 15  |
| 0 | 1 | 1 | 1 | 0 | 0 | 20  | 7.5 | 15  |
| 0 | 1 | 1 | 1 | 0 | 0 | 21  | 7.5 | 15  |
| 0 | 1 | 1 | 1 | 0 | 0 | 22  | 7.5 | 15  |
| 0 | 1 | 1 | 1 | 0 | 0 | 23  | 7.5 | 15  |
| 0 | 1 | 1 | 1 | 0 | 0 | 24  | 7.5 | 15  |
| 0 | 1 | 1 | 1 | 0 | 0 | 25  | 7.5 | 15  |
| 0 | 1 | 1 | 1 | 0 | 0 | 26  | 7.5 | 15  |
| 0 | 1 | 1 | 1 | 0 | 0 | 27  | 7.5 | 15  |
| 0 | 1 | 1 | 1 | 0 | 0 | 28  | 7.5 | 15  |
| 0 | 1 | 1 | 1 | 0 | 0 | 29  | 7.5 | 15  |
| 0 | 1 | 1 | 1 | 0 | 0 | 30  | 7.5 | 15  |
| 0 | 1 | 1 | 1 | 0 | 0 | 31  | 7.5 | 15  |
| 0 | 1 | 1 | 1 | 0 | 0 | 32  | 7.5 | 15  |
| 0 | 1 | 1 | 1 | 0 | 0 | 33  | 7.5 | 15  |
| 0 | 1 | 1 | 1 | 0 | 0 | 34  | 7.5 | 15  |
| 0 | 1 | 1 | 1 | 0 | 0 | 35  | 7.5 | 15  |
| 0 | 1 | 1 | 1 | 0 | 0 | 36  | 7.5 | 15  |
| 0 | 1 | 1 | 1 | 0 | 0 | 37  | 7.5 | 15  |
| 0 | 1 | 1 | 1 | 0 | 0 | 38  | 7.5 | 15  |
| 0 | 1 | 1 | 1 | 0 | 0 | 39  | 7.5 | 15  |
| 0 | 1 | 1 | 1 | 0 | 0 | 40  | 7.5 | 15  |
| 0 | 1 | 1 | 1 | 0 | 0 | 41  | 7.5 | 15  |
| 0 | 1 | 1 | 1 | 0 | 0 | 42  | 7.5 | 15  |

|   |   |   |   |   |   |    |     |     |
|---|---|---|---|---|---|----|-----|-----|
| 0 | 1 | 1 | 1 | 0 | 0 | 43 | 7.5 | 15  |
| 0 | 1 | 1 | 1 | 0 | 0 | 44 | 7.5 | 15  |
| 0 | 1 | 1 | 1 | 0 | 0 | 45 | 7.5 | 15  |
| 0 | 1 | 1 | 1 | 0 | 0 | 46 | 7.5 | 15  |
| 0 | 1 | 1 | 1 | 0 | 0 | 47 | 7.5 | 15  |
| 0 | 1 | 1 | 1 | 0 | 0 | 48 | 7.5 | 15  |
| 0 | 1 | 1 | 1 | 0 | 0 | 49 | 7.5 | 15  |
| 0 | 1 | 1 | 1 | 0 | 0 | 50 | 7.5 | 15  |
| 0 | 1 | 1 | 1 | 0 | 0 | 51 | 7.5 | 15  |
| 0 | 1 | 1 | 1 | 0 | 0 | 52 | 7.5 | 15  |
| 0 | 1 | 1 | 1 | 0 | 0 | 53 | 7.5 | 15  |
| 0 | 1 | 1 | 1 | 0 | 0 | 54 | 7.5 | 15  |
| 0 | 1 | 1 | 1 | 0 | 0 | 55 | 7.5 | 15  |
| 0 | 1 | 1 | 1 | 0 | 0 | 56 | 7.5 | 15  |
| 0 | 1 | 1 | 1 | 0 | 0 | 57 | 7.5 | 15  |
| 0 | 1 | 1 | 1 | 0 | 0 | 58 | 7.5 | 15  |
| 0 | 1 | 1 | 1 | 0 | 0 | 59 | 7.5 | 15  |
| 0 | 1 | 1 | 1 | 0 | 0 | 60 | 7.5 | 15  |
| 0 | 1 | 1 | 1 | 0 | 0 | 61 | 7.5 | 15  |
| 0 | 1 | 1 | 1 | 0 | 0 | 62 | 7.5 | 15  |
| 0 | 1 | 1 | 1 | 0 | 0 | 63 | 7.5 | 15  |
| 0 | 1 | 1 | 1 | 0 | 0 | 64 | 7.5 | 15  |
| 0 | 1 | 1 | 1 | 0 | 0 | 65 | 7.5 | 15  |
| 0 | 1 | 1 | 1 | 0 | 0 | 66 | 7.5 | 15  |
| 0 | 1 | 1 | 1 | 0 | 0 | 67 | 7.5 | 15  |
| 0 | 1 | 1 | 1 | 0 | 0 | 68 | 7.5 | 15  |
| 0 | 1 | 1 | 1 | 0 | 0 | 69 | 7.5 | 15  |
| 0 | 1 | 1 | 1 | 0 | 0 | 70 | 7.5 | 15  |
| 0 | 1 | 1 | 1 | 0 | 0 | 71 | 7.5 | 15  |
| 0 | 1 | 1 | 1 | 0 | 0 | 72 | 7.5 | 15  |
| 0 | 1 | 1 | 1 | 0 | 0 | 73 | 7.5 | 15  |
| 0 | 1 | 1 | 1 | 0 | 0 | 74 | 7.5 | 15  |
| 0 | 1 | 1 | 1 | 0 | 0 | 75 | 7.5 | 15  |
| 0 | 1 | 1 | 1 | 0 | 0 | 76 | 7.5 | 135 |
| 0 | 1 | 1 | 1 | 0 | 0 | 77 | 7.5 | 135 |
| 0 | 1 | 1 | 1 | 0 | 0 | 78 | 7.5 | 135 |
| 0 | 1 | 1 | 1 | 0 | 0 | 79 | 7.5 | 135 |
| 0 | 1 | 1 | 1 | 0 | 0 | 80 | 7.5 | 135 |
| 0 | 1 | 1 | 1 | 0 | 0 | 81 | 7.5 | 135 |
| 0 | 1 | 1 | 1 | 0 | 0 | 82 | 7.5 | 135 |
| 0 | 1 | 1 | 1 | 0 | 0 | 83 | 7.5 | 135 |
| 0 | 1 | 1 | 1 | 0 | 0 | 84 | 7.5 | 135 |
| 0 | 1 | 1 | 1 | 0 | 0 | 85 | 7.5 | 135 |
| 0 | 1 | 1 | 1 | 0 | 0 | 86 | 7.5 | 135 |
| 0 | 1 | 1 | 1 | 0 | 0 | 87 | 7.5 | 135 |
| 0 | 1 | 1 | 1 | 0 | 0 | 88 | 7.5 | 135 |

|   |   |   |   |   |   |     |     |     |
|---|---|---|---|---|---|-----|-----|-----|
| 0 | 1 | 1 | 1 | 0 | 0 | 89  | 7.5 | 135 |
| 0 | 1 | 1 | 1 | 0 | 0 | 90  | 7.5 | 135 |
| 0 | 1 | 1 | 1 | 0 | 0 | 91  | 7.5 | 135 |
| 0 | 1 | 1 | 1 | 0 | 0 | 92  | 7.5 | 135 |
| 0 | 1 | 1 | 1 | 0 | 0 | 93  | 7.5 | 135 |
| 0 | 1 | 1 | 1 | 0 | 0 | 94  | 7.5 | 135 |
| 0 | 1 | 1 | 1 | 0 | 0 | 95  | 7.5 | 135 |
| 0 | 1 | 1 | 1 | 0 | 0 | 96  | 7.5 | 135 |
| 0 | 1 | 1 | 1 | 0 | 0 | 97  | 7.5 | 135 |
| 0 | 1 | 1 | 1 | 0 | 0 | 98  | 7.5 | 135 |
| 0 | 1 | 1 | 1 | 0 | 0 | 99  | 7.5 | 135 |
| 0 | 1 | 1 | 1 | 0 | 0 | 100 | 7.5 | 135 |
| 0 | 1 | 1 | 1 | 0 | 0 | 101 | 7.5 | 135 |
| 0 | 1 | 1 | 1 | 0 | 0 | 102 | 7.5 | 135 |
| 0 | 1 | 1 | 1 | 0 | 0 | 103 | 7.5 | 135 |
| 0 | 1 | 1 | 1 | 0 | 0 | 104 | 7.5 | 135 |
| 0 | 1 | 1 | 1 | 0 | 0 | 105 | 7.5 | 135 |
| 0 | 1 | 1 | 1 | 0 | 0 | 106 | 7.5 | 135 |
| 0 | 1 | 1 | 1 | 0 | 0 | 107 | 7.5 | 135 |
| 0 | 1 | 1 | 1 | 0 | 0 | 108 | 7.5 | 135 |
| 0 | 1 | 1 | 1 | 0 | 0 | 109 | 7.5 | 135 |
| 0 | 1 | 1 | 1 | 0 | 0 | 110 | 7.5 | 135 |
| 0 | 1 | 1 | 1 | 0 | 0 | 111 | 7.5 | 135 |
| 0 | 1 | 1 | 1 | 0 | 0 | 112 | 7.5 | 135 |
| 0 | 1 | 1 | 1 | 0 | 0 | 113 | 7.5 | 135 |
| 0 | 1 | 1 | 1 | 0 | 0 | 114 | 7.5 | 135 |
| 0 | 1 | 1 | 1 | 0 | 0 | 115 | 7.5 | 135 |
| 0 | 1 | 1 | 1 | 0 | 0 | 116 | 7.5 | 135 |
| 0 | 1 | 1 | 1 | 0 | 0 | 117 | 7.5 | 135 |
| 0 | 1 | 1 | 1 | 0 | 0 | 118 | 7.5 | 135 |
| 0 | 1 | 1 | 1 | 0 | 0 | 119 | 7.5 | 135 |
| 0 | 1 | 1 | 1 | 0 | 0 | 120 | 7.5 | 135 |
| 0 | 1 | 1 | 1 | 0 | 0 | 121 | 7.5 | 135 |
| 0 | 1 | 1 | 1 | 0 | 0 | 122 | 7.5 | 135 |
| 0 | 1 | 1 | 1 | 0 | 0 | 123 | 7.5 | 135 |
| 0 | 1 | 1 | 1 | 0 | 0 | 124 | 7.5 | 135 |
| 0 | 1 | 1 | 1 | 0 | 0 | 125 | 7.5 | 135 |
| 0 | 1 | 1 | 1 | 0 | 0 | 126 | 7.5 | 135 |
| 0 | 1 | 1 | 1 | 0 | 0 | 127 | 7.5 | 135 |
| 0 | 1 | 1 | 1 | 0 | 0 | 128 | 7.5 | 135 |
| 0 | 1 | 1 | 1 | 0 | 0 | 129 | 7.5 | 135 |
| 0 | 1 | 1 | 1 | 0 | 0 | 130 | 7.5 | 135 |
| 0 | 1 | 1 | 1 | 0 | 0 | 131 | 7.5 | 135 |
| 0 | 1 | 1 | 1 | 0 | 0 | 132 | 7.5 | 135 |
| 0 | 1 | 1 | 1 | 0 | 0 | 133 | 7.5 | 135 |
| 0 | 1 | 1 | 1 | 0 | 0 | 134 | 7.5 | 135 |

|   |   |   |   |   |   |     |     |     |
|---|---|---|---|---|---|-----|-----|-----|
| 0 | 1 | 1 | 1 | 0 | 0 | 135 | 7.5 | 135 |
| 0 | 1 | 1 | 1 | 0 | 0 | 136 | 7.5 | 135 |
| 0 | 1 | 1 | 1 | 0 | 0 | 137 | 7.5 | 135 |
| 0 | 1 | 1 | 1 | 0 | 0 | 138 | 7.5 | 135 |
| 0 | 1 | 1 | 1 | 0 | 0 | 139 | 7.5 | 135 |
| 0 | 1 | 1 | 1 | 0 | 0 | 140 | 7.5 | 135 |
| 0 | 1 | 1 | 1 | 0 | 0 | 141 | 7.5 | 135 |
| 0 | 1 | 1 | 1 | 0 | 0 | 142 | 7.5 | 135 |
| 0 | 1 | 1 | 1 | 0 | 0 | 143 | 7.5 | 135 |
| 0 | 1 | 1 | 1 | 0 | 0 | 144 | 7.5 | 135 |
| 0 | 1 | 1 | 1 | 0 | 0 | 145 | 7.5 | 135 |
| 0 | 1 | 1 | 1 | 0 | 0 | 146 | 7.5 | 135 |
| 0 | 1 | 1 | 1 | 0 | 0 | 147 | 7.5 | 135 |
| 0 | 1 | 1 | 1 | 0 | 0 | 148 | 7.5 | 135 |
| 0 | 1 | 1 | 1 | 0 | 0 | 149 | 7.5 | 135 |
| 0 | 1 | 1 | 1 | 0 | 0 | 150 | 7.5 | 150 |
| 0 | 1 | 1 | 1 | 0 | 0 | 151 | 7.5 | 165 |
| 0 | 1 | 1 | 1 | 0 | 0 | 152 | 7.5 | 165 |
| 0 | 1 | 1 | 1 | 0 | 0 | 153 | 7.5 | 165 |
| 0 | 1 | 1 | 1 | 0 | 0 | 154 | 7.5 | 165 |
| 0 | 1 | 1 | 1 | 0 | 0 | 155 | 7.5 | 165 |
| 0 | 1 | 1 | 1 | 0 | 0 | 156 | 7.5 | 165 |
| 0 | 1 | 1 | 1 | 0 | 0 | 157 | 7.5 | 165 |
| 0 | 1 | 1 | 1 | 0 | 0 | 158 | 7.5 | 165 |
| 0 | 1 | 1 | 1 | 0 | 0 | 159 | 7.5 | 165 |
| 0 | 1 | 1 | 1 | 0 | 0 | 160 | 7.5 | 165 |
| 0 | 1 | 1 | 1 | 0 | 0 | 161 | 7.5 | 165 |
| 0 | 1 | 1 | 1 | 0 | 0 | 162 | 7.5 | 165 |
| 0 | 1 | 1 | 1 | 0 | 0 | 163 | 7.5 | 165 |
| 0 | 1 | 1 | 1 | 0 | 0 | 164 | 7.5 | 165 |
| 0 | 1 | 1 | 1 | 0 | 0 | 165 | 7.5 | 165 |
| 0 | 1 | 1 | 1 | 0 | 0 | 166 | 7.5 | 165 |
| 0 | 1 | 1 | 1 | 0 | 0 | 167 | 7.5 | 165 |
| 0 | 1 | 1 | 1 | 0 | 0 | 168 | 7.5 | 165 |
| 0 | 1 | 1 | 1 | 0 | 0 | 169 | 7.5 | 165 |
| 0 | 1 | 1 | 1 | 0 | 0 | 170 | 7.5 | 165 |
| 0 | 1 | 1 | 1 | 0 | 0 | 171 | 7.5 | 165 |
| 0 | 1 | 1 | 1 | 0 | 0 | 172 | 7.5 | 165 |
| 0 | 1 | 1 | 1 | 0 | 0 | 173 | 7.5 | 165 |
| 0 | 1 | 1 | 1 | 0 | 0 | 174 | 7.5 | 165 |
| 0 | 1 | 1 | 1 | 0 | 0 | 175 | 7.5 | 165 |
| 0 | 1 | 1 | 1 | 0 | 0 | 176 | 7.5 | 165 |
| 0 | 1 | 1 | 1 | 0 | 0 | 177 | 7.5 | 165 |
| 0 | 1 | 1 | 1 | 0 | 0 | 178 | 7.5 | 165 |
| 0 | 1 | 1 | 1 | 0 | 0 | 179 | 7.5 | 165 |
| 0 | 1 | 1 | 1 | 0 | 0 | 180 | 7.5 | 180 |

|   |   |   |   |   |   |    |     |    |
|---|---|---|---|---|---|----|-----|----|
| 0 | 1 | 1 | 0 | 1 | 0 | 0  | 7.5 | 0  |
| 0 | 1 | 1 | 0 | 1 | 0 | 1  | 7.5 | 15 |
| 0 | 1 | 1 | 0 | 1 | 0 | 2  | 7.5 | 15 |
| 0 | 1 | 1 | 0 | 1 | 0 | 3  | 7.5 | 15 |
| 0 | 1 | 1 | 0 | 1 | 0 | 4  | 7.5 | 15 |
| 0 | 1 | 1 | 0 | 1 | 0 | 5  | 7.5 | 15 |
| 0 | 1 | 1 | 0 | 1 | 0 | 6  | 7.5 | 15 |
| 0 | 1 | 1 | 0 | 1 | 0 | 7  | 7.5 | 15 |
| 0 | 1 | 1 | 0 | 1 | 0 | 8  | 7.5 | 15 |
| 0 | 1 | 1 | 0 | 1 | 0 | 9  | 7.5 | 15 |
| 0 | 1 | 1 | 0 | 1 | 0 | 10 | 7.5 | 15 |
| 0 | 1 | 1 | 0 | 1 | 0 | 11 | 7.5 | 15 |
| 0 | 1 | 1 | 0 | 1 | 0 | 12 | 7.5 | 15 |
| 0 | 1 | 1 | 0 | 1 | 0 | 13 | 7.5 | 15 |
| 0 | 1 | 1 | 0 | 1 | 0 | 14 | 7.5 | 15 |
| 0 | 1 | 1 | 0 | 1 | 0 | 15 | 7.5 | 15 |
| 0 | 1 | 1 | 0 | 1 | 0 | 16 | 7.5 | 15 |
| 0 | 1 | 1 | 0 | 1 | 0 | 17 | 7.5 | 15 |
| 0 | 1 | 1 | 0 | 1 | 0 | 18 | 7.5 | 15 |
| 0 | 1 | 1 | 0 | 1 | 0 | 19 | 7.5 | 15 |
| 0 | 1 | 1 | 0 | 1 | 0 | 20 | 7.5 | 15 |
| 0 | 1 | 1 | 0 | 1 | 0 | 21 | 7.5 | 15 |
| 0 | 1 | 1 | 0 | 1 | 0 | 22 | 7.5 | 15 |
| 0 | 1 | 1 | 0 | 1 | 0 | 23 | 7.5 | 15 |
| 0 | 1 | 1 | 0 | 1 | 0 | 24 | 7.5 | 15 |
| 0 | 1 | 1 | 0 | 1 | 0 | 25 | 7.5 | 15 |
| 0 | 1 | 1 | 0 | 1 | 0 | 26 | 7.5 | 15 |
| 0 | 1 | 1 | 0 | 1 | 0 | 27 | 7.5 | 15 |
| 0 | 1 | 1 | 0 | 1 | 0 | 28 | 7.5 | 15 |
| 0 | 1 | 1 | 0 | 1 | 0 | 29 | 7.5 | 15 |
| 0 | 1 | 1 | 0 | 1 | 0 | 30 | 7.5 | 15 |
| 0 | 1 | 1 | 0 | 1 | 0 | 31 | 7.5 | 15 |
| 0 | 1 | 1 | 0 | 1 | 0 | 32 | 7.5 | 15 |
| 0 | 1 | 1 | 0 | 1 | 0 | 33 | 7.5 | 15 |
| 0 | 1 | 1 | 0 | 1 | 0 | 34 | 7.5 | 15 |
| 0 | 1 | 1 | 0 | 1 | 0 | 35 | 7.5 | 15 |
| 0 | 1 | 1 | 0 | 1 | 0 | 36 | 7.5 | 15 |
| 0 | 1 | 1 | 0 | 1 | 0 | 37 | 7.5 | 15 |
| 0 | 1 | 1 | 0 | 1 | 0 | 38 | 7.5 | 15 |
| 0 | 1 | 1 | 0 | 1 | 0 | 39 | 7.5 | 15 |
| 0 | 1 | 1 | 0 | 1 | 0 | 40 | 7.5 | 15 |
| 0 | 1 | 1 | 0 | 1 | 0 | 41 | 7.5 | 15 |
| 0 | 1 | 1 | 0 | 1 | 0 | 42 | 7.5 | 15 |
| 0 | 1 | 1 | 0 | 1 | 0 | 43 | 7.5 | 15 |
| 0 | 1 | 1 | 0 | 1 | 0 | 44 | 7.5 | 15 |
| 0 | 1 | 1 | 0 | 1 | 0 | 45 | 7.5 | 15 |

|   |   |   |   |   |   |    |     |     |
|---|---|---|---|---|---|----|-----|-----|
| 0 | 1 | 1 | 0 | 1 | 0 | 46 | 7.5 | 15  |
| 0 | 1 | 1 | 0 | 1 | 0 | 47 | 7.5 | 15  |
| 0 | 1 | 1 | 0 | 1 | 0 | 48 | 7.5 | 15  |
| 0 | 1 | 1 | 0 | 1 | 0 | 49 | 7.5 | 15  |
| 0 | 1 | 1 | 0 | 1 | 0 | 50 | 7.5 | 15  |
| 0 | 1 | 1 | 0 | 1 | 0 | 51 | 7.5 | 15  |
| 0 | 1 | 1 | 0 | 1 | 0 | 52 | 7.5 | 15  |
| 0 | 1 | 1 | 0 | 1 | 0 | 53 | 7.5 | 15  |
| 0 | 1 | 1 | 0 | 1 | 0 | 54 | 7.5 | 15  |
| 0 | 1 | 1 | 0 | 1 | 0 | 55 | 7.5 | 15  |
| 0 | 1 | 1 | 0 | 1 | 0 | 56 | 7.5 | 15  |
| 0 | 1 | 1 | 0 | 1 | 0 | 57 | 7.5 | 15  |
| 0 | 1 | 1 | 0 | 1 | 0 | 58 | 7.5 | 15  |
| 0 | 1 | 1 | 0 | 1 | 0 | 59 | 7.5 | 15  |
| 0 | 1 | 1 | 0 | 1 | 0 | 60 | 7.5 | 105 |
| 0 | 1 | 1 | 0 | 1 | 0 | 61 | 7.5 | 105 |
| 0 | 1 | 1 | 0 | 1 | 0 | 62 | 7.5 | 105 |
| 0 | 1 | 1 | 0 | 1 | 0 | 63 | 7.5 | 105 |
| 0 | 1 | 1 | 0 | 1 | 0 | 64 | 7.5 | 105 |
| 0 | 1 | 1 | 0 | 1 | 0 | 65 | 7.5 | 105 |
| 0 | 1 | 1 | 0 | 1 | 0 | 66 | 7.5 | 105 |
| 0 | 1 | 1 | 0 | 1 | 0 | 67 | 7.5 | 105 |
| 0 | 1 | 1 | 0 | 1 | 0 | 68 | 7.5 | 105 |
| 0 | 1 | 1 | 0 | 1 | 0 | 69 | 7.5 | 105 |
| 0 | 1 | 1 | 0 | 1 | 0 | 70 | 7.5 | 105 |
| 0 | 1 | 1 | 0 | 1 | 0 | 71 | 7.5 | 105 |
| 0 | 1 | 1 | 0 | 1 | 0 | 72 | 7.5 | 105 |
| 0 | 1 | 1 | 0 | 1 | 0 | 73 | 7.5 | 105 |
| 0 | 1 | 1 | 0 | 1 | 0 | 74 | 7.5 | 105 |
| 0 | 1 | 1 | 0 | 1 | 0 | 75 | 7.5 | 105 |
| 0 | 1 | 1 | 0 | 1 | 0 | 76 | 7.5 | 105 |
| 0 | 1 | 1 | 0 | 1 | 0 | 77 | 7.5 | 105 |
| 0 | 1 | 1 | 0 | 1 | 0 | 78 | 7.5 | 105 |
| 0 | 1 | 1 | 0 | 1 | 0 | 79 | 7.5 | 105 |
| 0 | 1 | 1 | 0 | 1 | 0 | 80 | 7.5 | 105 |
| 0 | 1 | 1 | 0 | 1 | 0 | 81 | 7.5 | 105 |
| 0 | 1 | 1 | 0 | 1 | 0 | 82 | 7.5 | 105 |
| 0 | 1 | 1 | 0 | 1 | 0 | 83 | 7.5 | 105 |
| 0 | 1 | 1 | 0 | 1 | 0 | 84 | 7.5 | 105 |
| 0 | 1 | 1 | 0 | 1 | 0 | 85 | 7.5 | 105 |
| 0 | 1 | 1 | 0 | 1 | 0 | 86 | 7.5 | 105 |
| 0 | 1 | 1 | 0 | 1 | 0 | 87 | 7.5 | 105 |
| 0 | 1 | 1 | 0 | 1 | 0 | 88 | 7.5 | 105 |
| 0 | 1 | 1 | 0 | 1 | 0 | 89 | 7.5 | 105 |
| 0 | 1 | 1 | 0 | 1 | 0 | 90 | 7.5 | 105 |
| 0 | 1 | 1 | 0 | 1 | 0 | 91 | 7.5 | 105 |

|   |   |   |   |   |   |     |     |     |
|---|---|---|---|---|---|-----|-----|-----|
| 0 | 1 | 1 | 0 | 1 | 0 | 92  | 7.5 | 105 |
| 0 | 1 | 1 | 0 | 1 | 0 | 93  | 7.5 | 105 |
| 0 | 1 | 1 | 0 | 1 | 0 | 94  | 7.5 | 105 |
| 0 | 1 | 1 | 0 | 1 | 0 | 95  | 7.5 | 105 |
| 0 | 1 | 1 | 0 | 1 | 0 | 96  | 7.5 | 105 |
| 0 | 1 | 1 | 0 | 1 | 0 | 97  | 7.5 | 105 |
| 0 | 1 | 1 | 0 | 1 | 0 | 98  | 7.5 | 105 |
| 0 | 1 | 1 | 0 | 1 | 0 | 99  | 7.5 | 105 |
| 0 | 1 | 1 | 0 | 1 | 0 | 100 | 7.5 | 105 |
| 0 | 1 | 1 | 0 | 1 | 0 | 101 | 7.5 | 105 |
| 0 | 1 | 1 | 0 | 1 | 0 | 102 | 7.5 | 105 |
| 0 | 1 | 1 | 0 | 1 | 0 | 103 | 7.5 | 105 |
| 0 | 1 | 1 | 0 | 1 | 0 | 104 | 7.5 | 105 |
| 0 | 1 | 1 | 0 | 1 | 0 | 105 | 7.5 | 105 |
| 0 | 1 | 1 | 0 | 1 | 0 | 106 | 7.5 | 105 |
| 0 | 1 | 1 | 0 | 1 | 0 | 107 | 7.5 | 105 |
| 0 | 1 | 1 | 0 | 1 | 0 | 108 | 7.5 | 105 |
| 0 | 1 | 1 | 0 | 1 | 0 | 109 | 7.5 | 105 |
| 0 | 1 | 1 | 0 | 1 | 0 | 110 | 7.5 | 105 |
| 0 | 1 | 1 | 0 | 1 | 0 | 111 | 7.5 | 105 |
| 0 | 1 | 1 | 0 | 1 | 0 | 112 | 7.5 | 105 |
| 0 | 1 | 1 | 0 | 1 | 0 | 113 | 7.5 | 105 |
| 0 | 1 | 1 | 0 | 1 | 0 | 114 | 7.5 | 105 |
| 0 | 1 | 1 | 0 | 1 | 0 | 115 | 7.5 | 105 |
| 0 | 1 | 1 | 0 | 1 | 0 | 116 | 7.5 | 105 |
| 0 | 1 | 1 | 0 | 1 | 0 | 117 | 7.5 | 105 |
| 0 | 1 | 1 | 0 | 1 | 0 | 118 | 7.5 | 105 |
| 0 | 1 | 1 | 0 | 1 | 0 | 119 | 7.5 | 105 |
| 0 | 1 | 1 | 0 | 1 | 0 | 120 | 7.5 | 105 |
| 0 | 1 | 1 | 0 | 1 | 0 | 121 | 7.5 | 105 |
| 0 | 1 | 1 | 0 | 1 | 0 | 122 | 7.5 | 105 |
| 0 | 1 | 1 | 0 | 1 | 0 | 123 | 7.5 | 105 |
| 0 | 1 | 1 | 0 | 1 | 0 | 124 | 7.5 | 105 |
| 0 | 1 | 1 | 0 | 1 | 0 | 125 | 7.5 | 105 |
| 0 | 1 | 1 | 0 | 1 | 0 | 126 | 7.5 | 105 |
| 0 | 1 | 1 | 0 | 1 | 0 | 127 | 7.5 | 105 |
| 0 | 1 | 1 | 0 | 1 | 0 | 128 | 7.5 | 105 |
| 0 | 1 | 1 | 0 | 1 | 0 | 129 | 7.5 | 105 |
| 0 | 1 | 1 | 0 | 1 | 0 | 130 | 7.5 | 105 |
| 0 | 1 | 1 | 0 | 1 | 0 | 131 | 7.5 | 105 |
| 0 | 1 | 1 | 0 | 1 | 0 | 132 | 7.5 | 105 |
| 0 | 1 | 1 | 0 | 1 | 0 | 133 | 7.5 | 105 |
| 0 | 1 | 1 | 0 | 1 | 0 | 134 | 7.5 | 105 |
| 0 | 1 | 1 | 0 | 1 | 0 | 135 | 7.5 | 105 |
| 0 | 1 | 1 | 0 | 1 | 0 | 136 | 7.5 | 165 |
| 0 | 1 | 1 | 0 | 1 | 0 | 137 | 7.5 | 165 |

|   |   |   |   |   |   |     |     |     |
|---|---|---|---|---|---|-----|-----|-----|
| 0 | 1 | 1 | 0 | 1 | 0 | 138 | 7.5 | 165 |
| 0 | 1 | 1 | 0 | 1 | 0 | 139 | 7.5 | 165 |
| 0 | 1 | 1 | 0 | 1 | 0 | 140 | 7.5 | 165 |
| 0 | 1 | 1 | 0 | 1 | 0 | 141 | 7.5 | 165 |
| 0 | 1 | 1 | 0 | 1 | 0 | 142 | 7.5 | 165 |
| 0 | 1 | 1 | 0 | 1 | 0 | 143 | 7.5 | 165 |
| 0 | 1 | 1 | 0 | 1 | 0 | 144 | 7.5 | 165 |
| 0 | 1 | 1 | 0 | 1 | 0 | 145 | 7.5 | 165 |
| 0 | 1 | 1 | 0 | 1 | 0 | 146 | 7.5 | 165 |
| 0 | 1 | 1 | 0 | 1 | 0 | 147 | 7.5 | 165 |
| 0 | 1 | 1 | 0 | 1 | 0 | 148 | 7.5 | 165 |
| 0 | 1 | 1 | 0 | 1 | 0 | 149 | 7.5 | 165 |
| 0 | 1 | 1 | 0 | 1 | 0 | 150 | 7.5 | 165 |
| 0 | 1 | 1 | 0 | 1 | 0 | 151 | 7.5 | 165 |
| 0 | 1 | 1 | 0 | 1 | 0 | 152 | 7.5 | 165 |
| 0 | 1 | 1 | 0 | 1 | 0 | 153 | 7.5 | 165 |
| 0 | 1 | 1 | 0 | 1 | 0 | 154 | 7.5 | 165 |
| 0 | 1 | 1 | 0 | 1 | 0 | 155 | 7.5 | 165 |
| 0 | 1 | 1 | 0 | 1 | 0 | 156 | 7.5 | 165 |
| 0 | 1 | 1 | 0 | 1 | 0 | 157 | 7.5 | 165 |
| 0 | 1 | 1 | 0 | 1 | 0 | 158 | 7.5 | 165 |
| 0 | 1 | 1 | 0 | 1 | 0 | 159 | 7.5 | 165 |
| 0 | 1 | 1 | 0 | 1 | 0 | 160 | 7.5 | 165 |
| 0 | 1 | 1 | 0 | 1 | 0 | 161 | 7.5 | 165 |
| 0 | 1 | 1 | 0 | 1 | 0 | 162 | 7.5 | 165 |
| 0 | 1 | 1 | 0 | 1 | 0 | 163 | 7.5 | 165 |
| 0 | 1 | 1 | 0 | 1 | 0 | 164 | 7.5 | 165 |
| 0 | 1 | 1 | 0 | 1 | 0 | 165 | 7.5 | 165 |
| 0 | 1 | 1 | 0 | 1 | 0 | 166 | 7.5 | 165 |
| 0 | 1 | 1 | 0 | 1 | 0 | 167 | 7.5 | 165 |
| 0 | 1 | 1 | 0 | 1 | 0 | 168 | 7.5 | 165 |
| 0 | 1 | 1 | 0 | 1 | 0 | 169 | 7.5 | 165 |
| 0 | 1 | 1 | 0 | 1 | 0 | 170 | 7.5 | 165 |
| 0 | 1 | 1 | 0 | 1 | 0 | 171 | 7.5 | 165 |
| 0 | 1 | 1 | 0 | 1 | 0 | 172 | 7.5 | 165 |
| 0 | 1 | 1 | 0 | 1 | 0 | 173 | 7.5 | 165 |
| 0 | 1 | 1 | 0 | 1 | 0 | 174 | 7.5 | 165 |
| 0 | 1 | 1 | 0 | 1 | 0 | 175 | 7.5 | 165 |
| 0 | 1 | 1 | 0 | 1 | 0 | 176 | 7.5 | 165 |
| 0 | 1 | 1 | 0 | 1 | 0 | 177 | 7.5 | 165 |
| 0 | 1 | 1 | 0 | 1 | 0 | 178 | 7.5 | 165 |
| 0 | 1 | 1 | 0 | 1 | 0 | 179 | 7.5 | 165 |
| 0 | 1 | 1 | 0 | 1 | 0 | 180 | 7.5 | 180 |
| 0 | 1 | 1 | 0 | 0 | 1 | 0   | 7.5 | 0   |
| 0 | 1 | 1 | 0 | 0 | 1 | 1   | 7.5 | 15  |
| 0 | 1 | 1 | 0 | 0 | 1 | 2   | 7.5 | 15  |

|   |   |   |   |   |   |    |     |    |
|---|---|---|---|---|---|----|-----|----|
| 0 | 1 | 1 | 0 | 0 | 1 | 3  | 7.5 | 15 |
| 0 | 1 | 1 | 0 | 0 | 1 | 4  | 7.5 | 15 |
| 0 | 1 | 1 | 0 | 0 | 1 | 5  | 7.5 | 15 |
| 0 | 1 | 1 | 0 | 0 | 1 | 6  | 7.5 | 15 |
| 0 | 1 | 1 | 0 | 0 | 1 | 7  | 7.5 | 15 |
| 0 | 1 | 1 | 0 | 0 | 1 | 8  | 7.5 | 15 |
| 0 | 1 | 1 | 0 | 0 | 1 | 9  | 7.5 | 15 |
| 0 | 1 | 1 | 0 | 0 | 1 | 10 | 7.5 | 15 |
| 0 | 1 | 1 | 0 | 0 | 1 | 11 | 7.5 | 15 |
| 0 | 1 | 1 | 0 | 0 | 1 | 12 | 7.5 | 15 |
| 0 | 1 | 1 | 0 | 0 | 1 | 13 | 7.5 | 15 |
| 0 | 1 | 1 | 0 | 0 | 1 | 14 | 7.5 | 15 |
| 0 | 1 | 1 | 0 | 0 | 1 | 15 | 7.5 | 15 |
| 0 | 1 | 1 | 0 | 0 | 1 | 16 | 7.5 | 15 |
| 0 | 1 | 1 | 0 | 0 | 1 | 17 | 7.5 | 15 |
| 0 | 1 | 1 | 0 | 0 | 1 | 18 | 7.5 | 15 |
| 0 | 1 | 1 | 0 | 0 | 1 | 19 | 7.5 | 15 |
| 0 | 1 | 1 | 0 | 0 | 1 | 20 | 7.5 | 15 |
| 0 | 1 | 1 | 0 | 0 | 1 | 21 | 7.5 | 15 |
| 0 | 1 | 1 | 0 | 0 | 1 | 22 | 7.5 | 15 |
| 0 | 1 | 1 | 0 | 0 | 1 | 23 | 7.5 | 15 |
| 0 | 1 | 1 | 0 | 0 | 1 | 24 | 7.5 | 15 |
| 0 | 1 | 1 | 0 | 0 | 1 | 25 | 7.5 | 15 |
| 0 | 1 | 1 | 0 | 0 | 1 | 26 | 7.5 | 15 |
| 0 | 1 | 1 | 0 | 0 | 1 | 27 | 7.5 | 15 |
| 0 | 1 | 1 | 0 | 0 | 1 | 28 | 7.5 | 15 |
| 0 | 1 | 1 | 0 | 0 | 1 | 29 | 7.5 | 15 |
| 0 | 1 | 1 | 0 | 0 | 1 | 30 | 7.5 | 15 |
| 0 | 1 | 1 | 0 | 0 | 1 | 31 | 7.5 | 15 |
| 0 | 1 | 1 | 0 | 0 | 1 | 32 | 7.5 | 15 |
| 0 | 1 | 1 | 0 | 0 | 1 | 33 | 7.5 | 15 |
| 0 | 1 | 1 | 0 | 0 | 1 | 34 | 7.5 | 15 |
| 0 | 1 | 1 | 0 | 0 | 1 | 35 | 7.5 | 15 |
| 0 | 1 | 1 | 0 | 0 | 1 | 36 | 7.5 | 15 |
| 0 | 1 | 1 | 0 | 0 | 1 | 37 | 7.5 | 15 |
| 0 | 1 | 1 | 0 | 0 | 1 | 38 | 7.5 | 15 |
| 0 | 1 | 1 | 0 | 0 | 1 | 39 | 7.5 | 15 |
| 0 | 1 | 1 | 0 | 0 | 1 | 40 | 7.5 | 15 |
| 0 | 1 | 1 | 0 | 0 | 1 | 41 | 7.5 | 15 |
| 0 | 1 | 1 | 0 | 0 | 1 | 42 | 7.5 | 15 |
| 0 | 1 | 1 | 0 | 0 | 1 | 43 | 7.5 | 15 |
| 0 | 1 | 1 | 0 | 0 | 1 | 44 | 7.5 | 15 |
| 0 | 1 | 1 | 0 | 0 | 1 | 45 | 7.5 | 15 |
| 0 | 1 | 1 | 0 | 0 | 1 | 46 | 7.5 | 15 |
| 0 | 1 | 1 | 0 | 0 | 1 | 47 | 7.5 | 15 |
| 0 | 1 | 1 | 0 | 0 | 1 | 48 | 7.5 | 15 |

|   |   |   |   |   |   |    |     |     |
|---|---|---|---|---|---|----|-----|-----|
| 0 | 1 | 1 | 0 | 0 | 1 | 49 | 7.5 | 15  |
| 0 | 1 | 1 | 0 | 0 | 1 | 50 | 7.5 | 15  |
| 0 | 1 | 1 | 0 | 0 | 1 | 51 | 7.5 | 15  |
| 0 | 1 | 1 | 0 | 0 | 1 | 52 | 7.5 | 15  |
| 0 | 1 | 1 | 0 | 0 | 1 | 53 | 7.5 | 15  |
| 0 | 1 | 1 | 0 | 0 | 1 | 54 | 7.5 | 15  |
| 0 | 1 | 1 | 0 | 0 | 1 | 55 | 7.5 | 15  |
| 0 | 1 | 1 | 0 | 0 | 1 | 56 | 7.5 | 15  |
| 0 | 1 | 1 | 0 | 0 | 1 | 57 | 7.5 | 15  |
| 0 | 1 | 1 | 0 | 0 | 1 | 58 | 7.5 | 15  |
| 0 | 1 | 1 | 0 | 0 | 1 | 59 | 7.5 | 15  |
| 0 | 1 | 1 | 0 | 0 | 1 | 60 | 7.5 | 105 |
| 0 | 1 | 1 | 0 | 0 | 1 | 61 | 7.5 | 105 |
| 0 | 1 | 1 | 0 | 0 | 1 | 62 | 7.5 | 105 |
| 0 | 1 | 1 | 0 | 0 | 1 | 63 | 7.5 | 105 |
| 0 | 1 | 1 | 0 | 0 | 1 | 64 | 7.5 | 105 |
| 0 | 1 | 1 | 0 | 0 | 1 | 65 | 7.5 | 105 |
| 0 | 1 | 1 | 0 | 0 | 1 | 66 | 7.5 | 105 |
| 0 | 1 | 1 | 0 | 0 | 1 | 67 | 7.5 | 105 |
| 0 | 1 | 1 | 0 | 0 | 1 | 68 | 7.5 | 105 |
| 0 | 1 | 1 | 0 | 0 | 1 | 69 | 7.5 | 105 |
| 0 | 1 | 1 | 0 | 0 | 1 | 70 | 7.5 | 105 |
| 0 | 1 | 1 | 0 | 0 | 1 | 71 | 7.5 | 105 |
| 0 | 1 | 1 | 0 | 0 | 1 | 72 | 7.5 | 105 |
| 0 | 1 | 1 | 0 | 0 | 1 | 73 | 7.5 | 105 |
| 0 | 1 | 1 | 0 | 0 | 1 | 74 | 7.5 | 105 |
| 0 | 1 | 1 | 0 | 0 | 1 | 75 | 7.5 | 105 |
| 0 | 1 | 1 | 0 | 0 | 1 | 76 | 7.5 | 105 |
| 0 | 1 | 1 | 0 | 0 | 1 | 77 | 7.5 | 105 |
| 0 | 1 | 1 | 0 | 0 | 1 | 78 | 7.5 | 105 |
| 0 | 1 | 1 | 0 | 0 | 1 | 79 | 7.5 | 105 |
| 0 | 1 | 1 | 0 | 0 | 1 | 80 | 7.5 | 105 |
| 0 | 1 | 1 | 0 | 0 | 1 | 81 | 7.5 | 105 |
| 0 | 1 | 1 | 0 | 0 | 1 | 82 | 7.5 | 105 |
| 0 | 1 | 1 | 0 | 0 | 1 | 83 | 7.5 | 105 |
| 0 | 1 | 1 | 0 | 0 | 1 | 84 | 7.5 | 105 |
| 0 | 1 | 1 | 0 | 0 | 1 | 85 | 7.5 | 105 |
| 0 | 1 | 1 | 0 | 0 | 1 | 86 | 7.5 | 105 |
| 0 | 1 | 1 | 0 | 0 | 1 | 87 | 7.5 | 105 |
| 0 | 1 | 1 | 0 | 0 | 1 | 88 | 7.5 | 105 |
| 0 | 1 | 1 | 0 | 0 | 1 | 89 | 7.5 | 105 |
| 0 | 1 | 1 | 0 | 0 | 1 | 90 | 7.5 | 105 |
| 0 | 1 | 1 | 0 | 0 | 1 | 91 | 7.5 | 105 |
| 0 | 1 | 1 | 0 | 0 | 1 | 92 | 7.5 | 105 |
| 0 | 1 | 1 | 0 | 0 | 1 | 93 | 7.5 | 105 |
| 0 | 1 | 1 | 0 | 0 | 1 | 94 | 7.5 | 105 |

|   |   |   |   |   |   |     |     |     |
|---|---|---|---|---|---|-----|-----|-----|
| 0 | 1 | 1 | 0 | 0 | 1 | 95  | 7.5 | 105 |
| 0 | 1 | 1 | 0 | 0 | 1 | 96  | 7.5 | 105 |
| 0 | 1 | 1 | 0 | 0 | 1 | 97  | 7.5 | 105 |
| 0 | 1 | 1 | 0 | 0 | 1 | 98  | 7.5 | 105 |
| 0 | 1 | 1 | 0 | 0 | 1 | 99  | 7.5 | 105 |
| 0 | 1 | 1 | 0 | 0 | 1 | 100 | 7.5 | 105 |
| 0 | 1 | 1 | 0 | 0 | 1 | 101 | 7.5 | 105 |
| 0 | 1 | 1 | 0 | 0 | 1 | 102 | 7.5 | 105 |
| 0 | 1 | 1 | 0 | 0 | 1 | 103 | 7.5 | 105 |
| 0 | 1 | 1 | 0 | 0 | 1 | 104 | 7.5 | 105 |
| 0 | 1 | 1 | 0 | 0 | 1 | 105 | 7.5 | 105 |
| 0 | 1 | 1 | 0 | 0 | 1 | 106 | 7.5 | 105 |
| 0 | 1 | 1 | 0 | 0 | 1 | 107 | 7.5 | 105 |
| 0 | 1 | 1 | 0 | 0 | 1 | 108 | 7.5 | 105 |
| 0 | 1 | 1 | 0 | 0 | 1 | 109 | 7.5 | 105 |
| 0 | 1 | 1 | 0 | 0 | 1 | 110 | 7.5 | 105 |
| 0 | 1 | 1 | 0 | 0 | 1 | 111 | 7.5 | 105 |
| 0 | 1 | 1 | 0 | 0 | 1 | 112 | 7.5 | 105 |
| 0 | 1 | 1 | 0 | 0 | 1 | 113 | 7.5 | 105 |
| 0 | 1 | 1 | 0 | 0 | 1 | 114 | 7.5 | 105 |
| 0 | 1 | 1 | 0 | 0 | 1 | 115 | 7.5 | 105 |
| 0 | 1 | 1 | 0 | 0 | 1 | 116 | 7.5 | 105 |
| 0 | 1 | 1 | 0 | 0 | 1 | 117 | 7.5 | 105 |
| 0 | 1 | 1 | 0 | 0 | 1 | 118 | 7.5 | 105 |
| 0 | 1 | 1 | 0 | 0 | 1 | 119 | 7.5 | 105 |
| 0 | 1 | 1 | 0 | 0 | 1 | 120 | 7.5 | 120 |
| 0 | 1 | 1 | 0 | 0 | 1 | 121 | 7.5 | 135 |
| 0 | 1 | 1 | 0 | 0 | 1 | 122 | 7.5 | 135 |
| 0 | 1 | 1 | 0 | 0 | 1 | 123 | 7.5 | 135 |
| 0 | 1 | 1 | 0 | 0 | 1 | 124 | 7.5 | 135 |
| 0 | 1 | 1 | 0 | 0 | 1 | 125 | 7.5 | 135 |
| 0 | 1 | 1 | 0 | 0 | 1 | 126 | 7.5 | 135 |
| 0 | 1 | 1 | 0 | 0 | 1 | 127 | 7.5 | 135 |
| 0 | 1 | 1 | 0 | 0 | 1 | 128 | 7.5 | 135 |
| 0 | 1 | 1 | 0 | 0 | 1 | 129 | 7.5 | 135 |
| 0 | 1 | 1 | 0 | 0 | 1 | 130 | 7.5 | 135 |
| 0 | 1 | 1 | 0 | 0 | 1 | 131 | 7.5 | 135 |
| 0 | 1 | 1 | 0 | 0 | 1 | 132 | 7.5 | 135 |
| 0 | 1 | 1 | 0 | 0 | 1 | 133 | 7.5 | 135 |
| 0 | 1 | 1 | 0 | 0 | 1 | 134 | 7.5 | 135 |
| 0 | 1 | 1 | 0 | 0 | 1 | 135 | 7.5 | 135 |
| 0 | 1 | 1 | 0 | 0 | 1 | 136 | 7.5 | 135 |
| 0 | 1 | 1 | 0 | 0 | 1 | 137 | 7.5 | 135 |
| 0 | 1 | 1 | 0 | 0 | 1 | 138 | 7.5 | 135 |
| 0 | 1 | 1 | 0 | 0 | 1 | 139 | 7.5 | 135 |
| 0 | 1 | 1 | 0 | 0 | 1 | 140 | 7.5 | 135 |

|   |   |   |   |   |   |     |     |     |
|---|---|---|---|---|---|-----|-----|-----|
| 0 | 1 | 1 | 0 | 0 | 1 | 141 | 7.5 | 135 |
| 0 | 1 | 1 | 0 | 0 | 1 | 142 | 7.5 | 135 |
| 0 | 1 | 1 | 0 | 0 | 1 | 143 | 7.5 | 135 |
| 0 | 1 | 1 | 0 | 0 | 1 | 144 | 7.5 | 135 |
| 0 | 1 | 1 | 0 | 0 | 1 | 145 | 7.5 | 135 |
| 0 | 1 | 1 | 0 | 0 | 1 | 146 | 7.5 | 135 |
| 0 | 1 | 1 | 0 | 0 | 1 | 147 | 7.5 | 135 |
| 0 | 1 | 1 | 0 | 0 | 1 | 148 | 7.5 | 135 |
| 0 | 1 | 1 | 0 | 0 | 1 | 149 | 7.5 | 135 |
| 0 | 1 | 1 | 0 | 0 | 1 | 150 | 7.5 | 135 |
| 0 | 1 | 1 | 0 | 0 | 1 | 151 | 7.5 | 135 |
| 0 | 1 | 1 | 0 | 0 | 1 | 152 | 7.5 | 135 |
| 0 | 1 | 1 | 0 | 0 | 1 | 153 | 7.5 | 135 |
| 0 | 1 | 1 | 0 | 0 | 1 | 154 | 7.5 | 135 |
| 0 | 1 | 1 | 0 | 0 | 1 | 155 | 7.5 | 135 |
| 0 | 1 | 1 | 0 | 0 | 1 | 156 | 7.5 | 135 |
| 0 | 1 | 1 | 0 | 0 | 1 | 157 | 7.5 | 135 |
| 0 | 1 | 1 | 0 | 0 | 1 | 158 | 7.5 | 135 |
| 0 | 1 | 1 | 0 | 0 | 1 | 159 | 7.5 | 135 |
| 0 | 1 | 1 | 0 | 0 | 1 | 160 | 7.5 | 135 |
| 0 | 1 | 1 | 0 | 0 | 1 | 161 | 7.5 | 135 |
| 0 | 1 | 1 | 0 | 0 | 1 | 162 | 7.5 | 135 |
| 0 | 1 | 1 | 0 | 0 | 1 | 163 | 7.5 | 135 |
| 0 | 1 | 1 | 0 | 0 | 1 | 164 | 7.5 | 135 |
| 0 | 1 | 1 | 0 | 0 | 1 | 165 | 7.5 | 135 |
| 0 | 1 | 1 | 0 | 0 | 1 | 166 | 7.5 | 135 |
| 0 | 1 | 1 | 0 | 0 | 1 | 167 | 7.5 | 135 |
| 0 | 1 | 1 | 0 | 0 | 1 | 168 | 7.5 | 135 |
| 0 | 1 | 1 | 0 | 0 | 1 | 169 | 7.5 | 135 |
| 0 | 1 | 1 | 0 | 0 | 1 | 170 | 7.5 | 135 |
| 0 | 1 | 1 | 0 | 0 | 1 | 171 | 7.5 | 135 |
| 0 | 1 | 1 | 0 | 0 | 1 | 172 | 7.5 | 135 |
| 0 | 1 | 1 | 0 | 0 | 1 | 173 | 7.5 | 135 |
| 0 | 1 | 1 | 0 | 0 | 1 | 174 | 7.5 | 135 |
| 0 | 1 | 1 | 0 | 0 | 1 | 175 | 7.5 | 135 |
| 0 | 1 | 1 | 0 | 0 | 1 | 176 | 7.5 | 135 |
| 0 | 1 | 1 | 0 | 0 | 1 | 177 | 7.5 | 135 |
| 0 | 1 | 1 | 0 | 0 | 1 | 178 | 7.5 | 135 |
| 0 | 1 | 1 | 0 | 0 | 1 | 179 | 7.5 | 135 |
| 0 | 1 | 1 | 0 | 0 | 1 | 180 | 7.5 | 135 |
| 0 | 1 | 0 | 1 | 1 | 0 | 0   | 7.5 | 0   |
| 0 | 1 | 0 | 1 | 1 | 0 | 1   | 7.5 | 15  |
| 0 | 1 | 0 | 1 | 1 | 0 | 2   | 7.5 | 15  |
| 0 | 1 | 0 | 1 | 1 | 0 | 3   | 7.5 | 15  |
| 0 | 1 | 0 | 1 | 1 | 0 | 4   | 7.5 | 15  |
| 0 | 1 | 0 | 1 | 1 | 0 | 5   | 7.5 | 15  |

|   |   |   |   |   |   |    |     |    |
|---|---|---|---|---|---|----|-----|----|
| 0 | 1 | 0 | 1 | 1 | 0 | 6  | 7.5 | 15 |
| 0 | 1 | 0 | 1 | 1 | 0 | 7  | 7.5 | 15 |
| 0 | 1 | 0 | 1 | 1 | 0 | 8  | 7.5 | 15 |
| 0 | 1 | 0 | 1 | 1 | 0 | 9  | 7.5 | 15 |
| 0 | 1 | 0 | 1 | 1 | 0 | 10 | 7.5 | 15 |
| 0 | 1 | 0 | 1 | 1 | 0 | 11 | 7.5 | 15 |
| 0 | 1 | 0 | 1 | 1 | 0 | 12 | 7.5 | 15 |
| 0 | 1 | 0 | 1 | 1 | 0 | 13 | 7.5 | 15 |
| 0 | 1 | 0 | 1 | 1 | 0 | 14 | 7.5 | 15 |
| 0 | 1 | 0 | 1 | 1 | 0 | 15 | 7.5 | 15 |
| 0 | 1 | 0 | 1 | 1 | 0 | 16 | 7.5 | 15 |
| 0 | 1 | 0 | 1 | 1 | 0 | 17 | 7.5 | 15 |
| 0 | 1 | 0 | 1 | 1 | 0 | 18 | 7.5 | 15 |
| 0 | 1 | 0 | 1 | 1 | 0 | 19 | 7.5 | 15 |
| 0 | 1 | 0 | 1 | 1 | 0 | 20 | 7.5 | 15 |
| 0 | 1 | 0 | 1 | 1 | 0 | 21 | 7.5 | 15 |
| 0 | 1 | 0 | 1 | 1 | 0 | 22 | 7.5 | 15 |
| 0 | 1 | 0 | 1 | 1 | 0 | 23 | 7.5 | 15 |
| 0 | 1 | 0 | 1 | 1 | 0 | 24 | 7.5 | 15 |
| 0 | 1 | 0 | 1 | 1 | 0 | 25 | 7.5 | 15 |
| 0 | 1 | 0 | 1 | 1 | 0 | 26 | 7.5 | 15 |
| 0 | 1 | 0 | 1 | 1 | 0 | 27 | 7.5 | 15 |
| 0 | 1 | 0 | 1 | 1 | 0 | 28 | 7.5 | 15 |
| 0 | 1 | 0 | 1 | 1 | 0 | 29 | 7.5 | 15 |
| 0 | 1 | 0 | 1 | 1 | 0 | 30 | 7.5 | 15 |
| 0 | 1 | 0 | 1 | 1 | 0 | 31 | 7.5 | 15 |
| 0 | 1 | 0 | 1 | 1 | 0 | 32 | 7.5 | 15 |
| 0 | 1 | 0 | 1 | 1 | 0 | 33 | 7.5 | 15 |
| 0 | 1 | 0 | 1 | 1 | 0 | 34 | 7.5 | 15 |
| 0 | 1 | 0 | 1 | 1 | 0 | 35 | 7.5 | 15 |
| 0 | 1 | 0 | 1 | 1 | 0 | 36 | 7.5 | 15 |
| 0 | 1 | 0 | 1 | 1 | 0 | 37 | 7.5 | 15 |
| 0 | 1 | 0 | 1 | 1 | 0 | 38 | 7.5 | 15 |
| 0 | 1 | 0 | 1 | 1 | 0 | 39 | 7.5 | 15 |
| 0 | 1 | 0 | 1 | 1 | 0 | 40 | 7.5 | 15 |
| 0 | 1 | 0 | 1 | 1 | 0 | 41 | 7.5 | 15 |
| 0 | 1 | 0 | 1 | 1 | 0 | 42 | 7.5 | 15 |
| 0 | 1 | 0 | 1 | 1 | 0 | 43 | 7.5 | 15 |
| 0 | 1 | 0 | 1 | 1 | 0 | 44 | 7.5 | 15 |
| 0 | 1 | 0 | 1 | 1 | 0 | 45 | 7.5 | 15 |
| 0 | 1 | 0 | 1 | 1 | 0 | 46 | 7.5 | 75 |
| 0 | 1 | 0 | 1 | 1 | 0 | 47 | 7.5 | 75 |
| 0 | 1 | 0 | 1 | 1 | 0 | 48 | 7.5 | 75 |
| 0 | 1 | 0 | 1 | 1 | 0 | 49 | 7.5 | 75 |
| 0 | 1 | 0 | 1 | 1 | 0 | 50 | 7.5 | 75 |
| 0 | 1 | 0 | 1 | 1 | 0 | 51 | 7.5 | 75 |

|   |   |   |   |   |   |    |     |    |
|---|---|---|---|---|---|----|-----|----|
| 0 | 1 | 0 | 1 | 1 | 0 | 52 | 7.5 | 75 |
| 0 | 1 | 0 | 1 | 1 | 0 | 53 | 7.5 | 75 |
| 0 | 1 | 0 | 1 | 1 | 0 | 54 | 7.5 | 75 |
| 0 | 1 | 0 | 1 | 1 | 0 | 55 | 7.5 | 75 |
| 0 | 1 | 0 | 1 | 1 | 0 | 56 | 7.5 | 75 |
| 0 | 1 | 0 | 1 | 1 | 0 | 57 | 7.5 | 75 |
| 0 | 1 | 0 | 1 | 1 | 0 | 58 | 7.5 | 75 |
| 0 | 1 | 0 | 1 | 1 | 0 | 59 | 7.5 | 75 |
| 0 | 1 | 0 | 1 | 1 | 0 | 60 | 7.5 | 75 |
| 0 | 1 | 0 | 1 | 1 | 0 | 61 | 7.5 | 75 |
| 0 | 1 | 0 | 1 | 1 | 0 | 62 | 7.5 | 75 |
| 0 | 1 | 0 | 1 | 1 | 0 | 63 | 7.5 | 75 |
| 0 | 1 | 0 | 1 | 1 | 0 | 64 | 7.5 | 75 |
| 0 | 1 | 0 | 1 | 1 | 0 | 65 | 7.5 | 75 |
| 0 | 1 | 0 | 1 | 1 | 0 | 66 | 7.5 | 75 |
| 0 | 1 | 0 | 1 | 1 | 0 | 67 | 7.5 | 75 |
| 0 | 1 | 0 | 1 | 1 | 0 | 68 | 7.5 | 75 |
| 0 | 1 | 0 | 1 | 1 | 0 | 69 | 7.5 | 75 |
| 0 | 1 | 0 | 1 | 1 | 0 | 70 | 7.5 | 75 |
| 0 | 1 | 0 | 1 | 1 | 0 | 71 | 7.5 | 75 |
| 0 | 1 | 0 | 1 | 1 | 0 | 72 | 7.5 | 75 |
| 0 | 1 | 0 | 1 | 1 | 0 | 73 | 7.5 | 75 |
| 0 | 1 | 0 | 1 | 1 | 0 | 74 | 7.5 | 75 |
| 0 | 1 | 0 | 1 | 1 | 0 | 75 | 7.5 | 75 |
| 0 | 1 | 0 | 1 | 1 | 0 | 76 | 7.5 | 75 |
| 0 | 1 | 0 | 1 | 1 | 0 | 77 | 7.5 | 75 |
| 0 | 1 | 0 | 1 | 1 | 0 | 78 | 7.5 | 75 |
| 0 | 1 | 0 | 1 | 1 | 0 | 79 | 7.5 | 75 |
| 0 | 1 | 0 | 1 | 1 | 0 | 80 | 7.5 | 75 |
| 0 | 1 | 0 | 1 | 1 | 0 | 81 | 7.5 | 75 |
| 0 | 1 | 0 | 1 | 1 | 0 | 82 | 7.5 | 75 |
| 0 | 1 | 0 | 1 | 1 | 0 | 83 | 7.5 | 75 |
| 0 | 1 | 0 | 1 | 1 | 0 | 84 | 7.5 | 75 |
| 0 | 1 | 0 | 1 | 1 | 0 | 85 | 7.5 | 75 |
| 0 | 1 | 0 | 1 | 1 | 0 | 86 | 7.5 | 75 |
| 0 | 1 | 0 | 1 | 1 | 0 | 87 | 7.5 | 75 |
| 0 | 1 | 0 | 1 | 1 | 0 | 88 | 7.5 | 75 |
| 0 | 1 | 0 | 1 | 1 | 0 | 89 | 7.5 | 75 |
| 0 | 1 | 0 | 1 | 1 | 0 | 90 | 7.5 | 75 |
| 0 | 1 | 0 | 1 | 1 | 0 | 91 | 7.5 | 75 |
| 0 | 1 | 0 | 1 | 1 | 0 | 92 | 7.5 | 75 |
| 0 | 1 | 0 | 1 | 1 | 0 | 93 | 7.5 | 75 |
| 0 | 1 | 0 | 1 | 1 | 0 | 94 | 7.5 | 75 |
| 0 | 1 | 0 | 1 | 1 | 0 | 95 | 7.5 | 75 |
| 0 | 1 | 0 | 1 | 1 | 0 | 96 | 7.5 | 75 |
| 0 | 1 | 0 | 1 | 1 | 0 | 97 | 7.5 | 75 |
| 0 | 1 | 0 | 1 | 1 | 0 | 98 | 7.5 | 75 |

|   |   |   |   |   |   |     |     |     |
|---|---|---|---|---|---|-----|-----|-----|
| 0 | 1 | 0 | 1 | 1 | 0 | 99  | 7.5 | 75  |
| 0 | 1 | 0 | 1 | 1 | 0 | 100 | 7.5 | 75  |
| 0 | 1 | 0 | 1 | 1 | 0 | 101 | 7.5 | 75  |
| 0 | 1 | 0 | 1 | 1 | 0 | 102 | 7.5 | 75  |
| 0 | 1 | 0 | 1 | 1 | 0 | 103 | 7.5 | 75  |
| 0 | 1 | 0 | 1 | 1 | 0 | 104 | 7.5 | 75  |
| 0 | 1 | 0 | 1 | 1 | 0 | 105 | 7.5 | 75  |
| 0 | 1 | 0 | 1 | 1 | 0 | 106 | 7.5 | 75  |
| 0 | 1 | 0 | 1 | 1 | 0 | 107 | 7.5 | 75  |
| 0 | 1 | 0 | 1 | 1 | 0 | 108 | 7.5 | 75  |
| 0 | 1 | 0 | 1 | 1 | 0 | 109 | 7.5 | 75  |
| 0 | 1 | 0 | 1 | 1 | 0 | 110 | 7.5 | 75  |
| 0 | 1 | 0 | 1 | 1 | 0 | 111 | 7.5 | 75  |
| 0 | 1 | 0 | 1 | 1 | 0 | 112 | 7.5 | 75  |
| 0 | 1 | 0 | 1 | 1 | 0 | 113 | 7.5 | 75  |
| 0 | 1 | 0 | 1 | 1 | 0 | 114 | 7.5 | 75  |
| 0 | 1 | 0 | 1 | 1 | 0 | 115 | 7.5 | 75  |
| 0 | 1 | 0 | 1 | 1 | 0 | 116 | 7.5 | 75  |
| 0 | 1 | 0 | 1 | 1 | 0 | 117 | 7.5 | 75  |
| 0 | 1 | 0 | 1 | 1 | 0 | 118 | 7.5 | 75  |
| 0 | 1 | 0 | 1 | 1 | 0 | 119 | 7.5 | 75  |
| 0 | 1 | 0 | 1 | 1 | 0 | 120 | 7.5 | 165 |
| 0 | 1 | 0 | 1 | 1 | 0 | 121 | 7.5 | 165 |
| 0 | 1 | 0 | 1 | 1 | 0 | 122 | 7.5 | 165 |
| 0 | 1 | 0 | 1 | 1 | 0 | 123 | 7.5 | 165 |
| 0 | 1 | 0 | 1 | 1 | 0 | 124 | 7.5 | 165 |
| 0 | 1 | 0 | 1 | 1 | 0 | 125 | 7.5 | 165 |
| 0 | 1 | 0 | 1 | 1 | 0 | 126 | 7.5 | 165 |
| 0 | 1 | 0 | 1 | 1 | 0 | 127 | 7.5 | 165 |
| 0 | 1 | 0 | 1 | 1 | 0 | 128 | 7.5 | 165 |
| 0 | 1 | 0 | 1 | 1 | 0 | 129 | 7.5 | 165 |
| 0 | 1 | 0 | 1 | 1 | 0 | 130 | 7.5 | 165 |
| 0 | 1 | 0 | 1 | 1 | 0 | 131 | 7.5 | 165 |
| 0 | 1 | 0 | 1 | 1 | 0 | 132 | 7.5 | 165 |
| 0 | 1 | 0 | 1 | 1 | 0 | 133 | 7.5 | 165 |
| 0 | 1 | 0 | 1 | 1 | 0 | 134 | 7.5 | 165 |
| 0 | 1 | 0 | 1 | 1 | 0 | 135 | 7.5 | 165 |
| 0 | 1 | 0 | 1 | 1 | 0 | 136 | 7.5 | 165 |
| 0 | 1 | 0 | 1 | 1 | 0 | 137 | 7.5 | 165 |
| 0 | 1 | 0 | 1 | 1 | 0 | 138 | 7.5 | 165 |
| 0 | 1 | 0 | 1 | 1 | 0 | 139 | 7.5 | 165 |
| 0 | 1 | 0 | 1 | 1 | 0 | 140 | 7.5 | 165 |
| 0 | 1 | 0 | 1 | 1 | 0 | 141 | 7.5 | 165 |
| 0 | 1 | 0 | 1 | 1 | 0 | 142 | 7.5 | 165 |
| 0 | 1 | 0 | 1 | 1 | 0 | 143 | 7.5 | 165 |
| 0 | 1 | 0 | 1 | 1 | 0 | 144 | 7.5 | 165 |
| 0 | 1 | 0 | 1 | 1 | 0 | 145 | 7.5 | 165 |

|   |   |   |   |   |   |     |     |     |
|---|---|---|---|---|---|-----|-----|-----|
| 0 | 1 | 0 | 1 | 1 | 0 | 146 | 7.5 | 165 |
| 0 | 1 | 0 | 1 | 1 | 0 | 147 | 7.5 | 165 |
| 0 | 1 | 0 | 1 | 1 | 0 | 148 | 7.5 | 165 |
| 0 | 1 | 0 | 1 | 1 | 0 | 149 | 7.5 | 165 |
| 0 | 1 | 0 | 1 | 1 | 0 | 150 | 7.5 | 165 |
| 0 | 1 | 0 | 1 | 1 | 0 | 151 | 7.5 | 165 |
| 0 | 1 | 0 | 1 | 1 | 0 | 152 | 7.5 | 165 |
| 0 | 1 | 0 | 1 | 1 | 0 | 153 | 7.5 | 165 |
| 0 | 1 | 0 | 1 | 1 | 0 | 154 | 7.5 | 165 |
| 0 | 1 | 0 | 1 | 1 | 0 | 155 | 7.5 | 165 |
| 0 | 1 | 0 | 1 | 1 | 0 | 156 | 7.5 | 165 |
| 0 | 1 | 0 | 1 | 1 | 0 | 157 | 7.5 | 165 |
| 0 | 1 | 0 | 1 | 1 | 0 | 158 | 7.5 | 165 |
| 0 | 1 | 0 | 1 | 1 | 0 | 159 | 7.5 | 165 |
| 0 | 1 | 0 | 1 | 1 | 0 | 160 | 7.5 | 165 |
| 0 | 1 | 0 | 1 | 1 | 0 | 161 | 7.5 | 165 |
| 0 | 1 | 0 | 1 | 1 | 0 | 162 | 7.5 | 165 |
| 0 | 1 | 0 | 1 | 1 | 0 | 163 | 7.5 | 165 |
| 0 | 1 | 0 | 1 | 1 | 0 | 164 | 7.5 | 165 |
| 0 | 1 | 0 | 1 | 1 | 0 | 165 | 7.5 | 165 |
| 0 | 1 | 0 | 1 | 1 | 0 | 166 | 7.5 | 165 |
| 0 | 1 | 0 | 1 | 1 | 0 | 167 | 7.5 | 165 |
| 0 | 1 | 0 | 1 | 1 | 0 | 168 | 7.5 | 165 |
| 0 | 1 | 0 | 1 | 1 | 0 | 169 | 7.5 | 165 |
| 0 | 1 | 0 | 1 | 1 | 0 | 170 | 7.5 | 165 |
| 0 | 1 | 0 | 1 | 1 | 0 | 171 | 7.5 | 165 |
| 0 | 1 | 0 | 1 | 1 | 0 | 172 | 7.5 | 165 |
| 0 | 1 | 0 | 1 | 1 | 0 | 173 | 7.5 | 165 |
| 0 | 1 | 0 | 1 | 1 | 0 | 174 | 7.5 | 165 |
| 0 | 1 | 0 | 1 | 1 | 0 | 175 | 7.5 | 165 |
| 0 | 1 | 0 | 1 | 1 | 0 | 176 | 7.5 | 165 |
| 0 | 1 | 0 | 1 | 1 | 0 | 177 | 7.5 | 165 |
| 0 | 1 | 0 | 1 | 1 | 0 | 178 | 7.5 | 165 |
| 0 | 1 | 0 | 1 | 1 | 0 | 179 | 7.5 | 165 |
| 0 | 1 | 0 | 1 | 1 | 0 | 180 | 7.5 | 180 |
| 0 | 1 | 0 | 1 | 0 | 1 | 0   | 7.5 | 0   |
| 0 | 1 | 0 | 1 | 0 | 1 | 1   | 7.5 | 15  |
| 0 | 1 | 0 | 1 | 0 | 1 | 2   | 7.5 | 15  |
| 0 | 1 | 0 | 1 | 0 | 1 | 3   | 7.5 | 15  |
| 0 | 1 | 0 | 1 | 0 | 1 | 4   | 7.5 | 15  |
| 0 | 1 | 0 | 1 | 0 | 1 | 5   | 7.5 | 15  |
| 0 | 1 | 0 | 1 | 0 | 1 | 6   | 7.5 | 15  |
| 0 | 1 | 0 | 1 | 0 | 1 | 7   | 7.5 | 15  |
| 0 | 1 | 0 | 1 | 0 | 1 | 8   | 7.5 | 15  |
| 0 | 1 | 0 | 1 | 0 | 1 | 9   | 7.5 | 15  |
| 0 | 1 | 0 | 1 | 0 | 1 | 10  | 7.5 | 15  |

|   |   |   |   |   |   |    |     |    |
|---|---|---|---|---|---|----|-----|----|
| 0 | 1 | 0 | 1 | 0 | 1 | 11 | 7.5 | 15 |
| 0 | 1 | 0 | 1 | 0 | 1 | 12 | 7.5 | 15 |
| 0 | 1 | 0 | 1 | 0 | 1 | 13 | 7.5 | 15 |
| 0 | 1 | 0 | 1 | 0 | 1 | 14 | 7.5 | 15 |
| 0 | 1 | 0 | 1 | 0 | 1 | 15 | 7.5 | 15 |
| 0 | 1 | 0 | 1 | 0 | 1 | 16 | 7.5 | 15 |
| 0 | 1 | 0 | 1 | 0 | 1 | 17 | 7.5 | 15 |
| 0 | 1 | 0 | 1 | 0 | 1 | 18 | 7.5 | 15 |
| 0 | 1 | 0 | 1 | 0 | 1 | 19 | 7.5 | 15 |
| 0 | 1 | 0 | 1 | 0 | 1 | 20 | 7.5 | 15 |
| 0 | 1 | 0 | 1 | 0 | 1 | 21 | 7.5 | 15 |
| 0 | 1 | 0 | 1 | 0 | 1 | 22 | 7.5 | 15 |
| 0 | 1 | 0 | 1 | 0 | 1 | 23 | 7.5 | 15 |
| 0 | 1 | 0 | 1 | 0 | 1 | 24 | 7.5 | 15 |
| 0 | 1 | 0 | 1 | 0 | 1 | 25 | 7.5 | 15 |
| 0 | 1 | 0 | 1 | 0 | 1 | 26 | 7.5 | 15 |
| 0 | 1 | 0 | 1 | 0 | 1 | 27 | 7.5 | 15 |
| 0 | 1 | 0 | 1 | 0 | 1 | 28 | 7.5 | 15 |
| 0 | 1 | 0 | 1 | 0 | 1 | 29 | 7.5 | 15 |
| 0 | 1 | 0 | 1 | 0 | 1 | 30 | 7.5 | 15 |
| 0 | 1 | 0 | 1 | 0 | 1 | 31 | 7.5 | 15 |
| 0 | 1 | 0 | 1 | 0 | 1 | 32 | 7.5 | 15 |
| 0 | 1 | 0 | 1 | 0 | 1 | 33 | 7.5 | 15 |
| 0 | 1 | 0 | 1 | 0 | 1 | 34 | 7.5 | 15 |
| 0 | 1 | 0 | 1 | 0 | 1 | 35 | 7.5 | 15 |
| 0 | 1 | 0 | 1 | 0 | 1 | 36 | 7.5 | 15 |
| 0 | 1 | 0 | 1 | 0 | 1 | 37 | 7.5 | 15 |
| 0 | 1 | 0 | 1 | 0 | 1 | 38 | 7.5 | 15 |
| 0 | 1 | 0 | 1 | 0 | 1 | 39 | 7.5 | 15 |
| 0 | 1 | 0 | 1 | 0 | 1 | 40 | 7.5 | 15 |
| 0 | 1 | 0 | 1 | 0 | 1 | 41 | 7.5 | 15 |
| 0 | 1 | 0 | 1 | 0 | 1 | 42 | 7.5 | 15 |
| 0 | 1 | 0 | 1 | 0 | 1 | 43 | 7.5 | 15 |
| 0 | 1 | 0 | 1 | 0 | 1 | 44 | 7.5 | 15 |
| 0 | 1 | 0 | 1 | 0 | 1 | 45 | 7.5 | 15 |
| 0 | 1 | 0 | 1 | 0 | 1 | 46 | 7.5 | 75 |
| 0 | 1 | 0 | 1 | 0 | 1 | 47 | 7.5 | 75 |
| 0 | 1 | 0 | 1 | 0 | 1 | 48 | 7.5 | 75 |
| 0 | 1 | 0 | 1 | 0 | 1 | 49 | 7.5 | 75 |
| 0 | 1 | 0 | 1 | 0 | 1 | 50 | 7.5 | 75 |
| 0 | 1 | 0 | 1 | 0 | 1 | 51 | 7.5 | 75 |
| 0 | 1 | 0 | 1 | 0 | 1 | 52 | 7.5 | 75 |
| 0 | 1 | 0 | 1 | 0 | 1 | 53 | 7.5 | 75 |
| 0 | 1 | 0 | 1 | 0 | 1 | 54 | 7.5 | 75 |
| 0 | 1 | 0 | 1 | 0 | 1 | 55 | 7.5 | 75 |
| 0 | 1 | 0 | 1 | 0 | 1 | 56 | 7.5 | 75 |
| 0 | 1 | 0 | 1 | 0 | 1 | 57 | 7.5 | 75 |

|   |   |   |   |   |   |     |     |    |
|---|---|---|---|---|---|-----|-----|----|
| 0 | 1 | 0 | 1 | 0 | 1 | 58  | 7.5 | 75 |
| 0 | 1 | 0 | 1 | 0 | 1 | 59  | 7.5 | 75 |
| 0 | 1 | 0 | 1 | 0 | 1 | 60  | 7.5 | 75 |
| 0 | 1 | 0 | 1 | 0 | 1 | 61  | 7.5 | 75 |
| 0 | 1 | 0 | 1 | 0 | 1 | 62  | 7.5 | 75 |
| 0 | 1 | 0 | 1 | 0 | 1 | 63  | 7.5 | 75 |
| 0 | 1 | 0 | 1 | 0 | 1 | 64  | 7.5 | 75 |
| 0 | 1 | 0 | 1 | 0 | 1 | 65  | 7.5 | 75 |
| 0 | 1 | 0 | 1 | 0 | 1 | 66  | 7.5 | 75 |
| 0 | 1 | 0 | 1 | 0 | 1 | 67  | 7.5 | 75 |
| 0 | 1 | 0 | 1 | 0 | 1 | 68  | 7.5 | 75 |
| 0 | 1 | 0 | 1 | 0 | 1 | 69  | 7.5 | 75 |
| 0 | 1 | 0 | 1 | 0 | 1 | 70  | 7.5 | 75 |
| 0 | 1 | 0 | 1 | 0 | 1 | 71  | 7.5 | 75 |
| 0 | 1 | 0 | 1 | 0 | 1 | 72  | 7.5 | 75 |
| 0 | 1 | 0 | 1 | 0 | 1 | 73  | 7.5 | 75 |
| 0 | 1 | 0 | 1 | 0 | 1 | 74  | 7.5 | 75 |
| 0 | 1 | 0 | 1 | 0 | 1 | 75  | 7.5 | 75 |
| 0 | 1 | 0 | 1 | 0 | 1 | 76  | 7.5 | 75 |
| 0 | 1 | 0 | 1 | 0 | 1 | 77  | 7.5 | 75 |
| 0 | 1 | 0 | 1 | 0 | 1 | 78  | 7.5 | 75 |
| 0 | 1 | 0 | 1 | 0 | 1 | 79  | 7.5 | 75 |
| 0 | 1 | 0 | 1 | 0 | 1 | 80  | 7.5 | 75 |
| 0 | 1 | 0 | 1 | 0 | 1 | 81  | 7.5 | 75 |
| 0 | 1 | 0 | 1 | 0 | 1 | 82  | 7.5 | 75 |
| 0 | 1 | 0 | 1 | 0 | 1 | 83  | 7.5 | 75 |
| 0 | 1 | 0 | 1 | 0 | 1 | 84  | 7.5 | 75 |
| 0 | 1 | 0 | 1 | 0 | 1 | 85  | 7.5 | 75 |
| 0 | 1 | 0 | 1 | 0 | 1 | 86  | 7.5 | 75 |
| 0 | 1 | 0 | 1 | 0 | 1 | 87  | 7.5 | 75 |
| 0 | 1 | 0 | 1 | 0 | 1 | 88  | 7.5 | 75 |
| 0 | 1 | 0 | 1 | 0 | 1 | 89  | 7.5 | 75 |
| 0 | 1 | 0 | 1 | 0 | 1 | 90  | 7.5 | 75 |
| 0 | 1 | 0 | 1 | 0 | 1 | 91  | 7.5 | 75 |
| 0 | 1 | 0 | 1 | 0 | 1 | 92  | 7.5 | 75 |
| 0 | 1 | 0 | 1 | 0 | 1 | 93  | 7.5 | 75 |
| 0 | 1 | 0 | 1 | 0 | 1 | 94  | 7.5 | 75 |
| 0 | 1 | 0 | 1 | 0 | 1 | 95  | 7.5 | 75 |
| 0 | 1 | 0 | 1 | 0 | 1 | 96  | 7.5 | 75 |
| 0 | 1 | 0 | 1 | 0 | 1 | 97  | 7.5 | 75 |
| 0 | 1 | 0 | 1 | 0 | 1 | 98  | 7.5 | 75 |
| 0 | 1 | 0 | 1 | 0 | 1 | 99  | 7.5 | 75 |
| 0 | 1 | 0 | 1 | 0 | 1 | 100 | 7.5 | 75 |
| 0 | 1 | 0 | 1 | 0 | 1 | 101 | 7.5 | 75 |
| 0 | 1 | 0 | 1 | 0 | 1 | 102 | 7.5 | 75 |
| 0 | 1 | 0 | 1 | 0 | 1 | 103 | 7.5 | 75 |
| 0 | 1 | 0 | 1 | 0 | 1 | 104 | 7.5 | 75 |

|   |   |   |   |   |   |     |     |     |
|---|---|---|---|---|---|-----|-----|-----|
| 0 | 1 | 0 | 1 | 0 | 1 | 105 | 7.5 | 75  |
| 0 | 1 | 0 | 1 | 0 | 1 | 106 | 7.5 | 135 |
| 0 | 1 | 0 | 1 | 0 | 1 | 107 | 7.5 | 135 |
| 0 | 1 | 0 | 1 | 0 | 1 | 108 | 7.5 | 135 |
| 0 | 1 | 0 | 1 | 0 | 1 | 109 | 7.5 | 135 |
| 0 | 1 | 0 | 1 | 0 | 1 | 110 | 7.5 | 135 |
| 0 | 1 | 0 | 1 | 0 | 1 | 111 | 7.5 | 135 |
| 0 | 1 | 0 | 1 | 0 | 1 | 112 | 7.5 | 135 |
| 0 | 1 | 0 | 1 | 0 | 1 | 113 | 7.5 | 135 |
| 0 | 1 | 0 | 1 | 0 | 1 | 114 | 7.5 | 135 |
| 0 | 1 | 0 | 1 | 0 | 1 | 115 | 7.5 | 135 |
| 0 | 1 | 0 | 1 | 0 | 1 | 116 | 7.5 | 135 |
| 0 | 1 | 0 | 1 | 0 | 1 | 117 | 7.5 | 135 |
| 0 | 1 | 0 | 1 | 0 | 1 | 118 | 7.5 | 135 |
| 0 | 1 | 0 | 1 | 0 | 1 | 119 | 7.5 | 135 |
| 0 | 1 | 0 | 1 | 0 | 1 | 120 | 7.5 | 135 |
| 0 | 1 | 0 | 1 | 0 | 1 | 121 | 7.5 | 135 |
| 0 | 1 | 0 | 1 | 0 | 1 | 122 | 7.5 | 135 |
| 0 | 1 | 0 | 1 | 0 | 1 | 123 | 7.5 | 135 |
| 0 | 1 | 0 | 1 | 0 | 1 | 124 | 7.5 | 135 |
| 0 | 1 | 0 | 1 | 0 | 1 | 125 | 7.5 | 135 |
| 0 | 1 | 0 | 1 | 0 | 1 | 126 | 7.5 | 135 |
| 0 | 1 | 0 | 1 | 0 | 1 | 127 | 7.5 | 135 |
| 0 | 1 | 0 | 1 | 0 | 1 | 128 | 7.5 | 135 |
| 0 | 1 | 0 | 1 | 0 | 1 | 129 | 7.5 | 135 |
| 0 | 1 | 0 | 1 | 0 | 1 | 130 | 7.5 | 135 |
| 0 | 1 | 0 | 1 | 0 | 1 | 131 | 7.5 | 135 |
| 0 | 1 | 0 | 1 | 0 | 1 | 132 | 7.5 | 135 |
| 0 | 1 | 0 | 1 | 0 | 1 | 133 | 7.5 | 135 |
| 0 | 1 | 0 | 1 | 0 | 1 | 134 | 7.5 | 135 |
| 0 | 1 | 0 | 1 | 0 | 1 | 135 | 7.5 | 135 |
| 0 | 1 | 0 | 1 | 0 | 1 | 136 | 7.5 | 135 |
| 0 | 1 | 0 | 1 | 0 | 1 | 137 | 7.5 | 135 |
| 0 | 1 | 0 | 1 | 0 | 1 | 138 | 7.5 | 135 |
| 0 | 1 | 0 | 1 | 0 | 1 | 139 | 7.5 | 135 |
| 0 | 1 | 0 | 1 | 0 | 1 | 140 | 7.5 | 135 |
| 0 | 1 | 0 | 1 | 0 | 1 | 141 | 7.5 | 135 |
| 0 | 1 | 0 | 1 | 0 | 1 | 142 | 7.5 | 135 |
| 0 | 1 | 0 | 1 | 0 | 1 | 143 | 7.5 | 135 |
| 0 | 1 | 0 | 1 | 0 | 1 | 144 | 7.5 | 135 |
| 0 | 1 | 0 | 1 | 0 | 1 | 145 | 7.5 | 135 |
| 0 | 1 | 0 | 1 | 0 | 1 | 146 | 7.5 | 135 |
| 0 | 1 | 0 | 1 | 0 | 1 | 147 | 7.5 | 135 |
| 0 | 1 | 0 | 1 | 0 | 1 | 148 | 7.5 | 135 |
| 0 | 1 | 0 | 1 | 0 | 1 | 149 | 7.5 | 135 |
| 0 | 1 | 0 | 1 | 0 | 1 | 150 | 7.5 | 135 |

|   |   |   |   |   |   |     |     |     |
|---|---|---|---|---|---|-----|-----|-----|
| 0 | 1 | 0 | 1 | 0 | 1 | 151 | 7.5 | 135 |
| 0 | 1 | 0 | 1 | 0 | 1 | 152 | 7.5 | 135 |
| 0 | 1 | 0 | 1 | 0 | 1 | 153 | 7.5 | 135 |
| 0 | 1 | 0 | 1 | 0 | 1 | 154 | 7.5 | 135 |
| 0 | 1 | 0 | 1 | 0 | 1 | 155 | 7.5 | 135 |
| 0 | 1 | 0 | 1 | 0 | 1 | 156 | 7.5 | 135 |
| 0 | 1 | 0 | 1 | 0 | 1 | 157 | 7.5 | 135 |
| 0 | 1 | 0 | 1 | 0 | 1 | 158 | 7.5 | 135 |
| 0 | 1 | 0 | 1 | 0 | 1 | 159 | 7.5 | 135 |
| 0 | 1 | 0 | 1 | 0 | 1 | 160 | 7.5 | 135 |
| 0 | 1 | 0 | 1 | 0 | 1 | 161 | 7.5 | 135 |
| 0 | 1 | 0 | 1 | 0 | 1 | 162 | 7.5 | 135 |
| 0 | 1 | 0 | 1 | 0 | 1 | 163 | 7.5 | 135 |
| 0 | 1 | 0 | 1 | 0 | 1 | 164 | 7.5 | 135 |
| 0 | 1 | 0 | 1 | 0 | 1 | 165 | 7.5 | 135 |
| 0 | 1 | 0 | 1 | 0 | 1 | 166 | 7.5 | 135 |
| 0 | 1 | 0 | 1 | 0 | 1 | 167 | 7.5 | 135 |
| 0 | 1 | 0 | 1 | 0 | 1 | 168 | 7.5 | 135 |
| 0 | 1 | 0 | 1 | 0 | 1 | 169 | 7.5 | 135 |
| 0 | 1 | 0 | 1 | 0 | 1 | 170 | 7.5 | 135 |
| 0 | 1 | 0 | 1 | 0 | 1 | 171 | 7.5 | 135 |
| 0 | 1 | 0 | 1 | 0 | 1 | 172 | 7.5 | 135 |
| 0 | 1 | 0 | 1 | 0 | 1 | 173 | 7.5 | 135 |
| 0 | 1 | 0 | 1 | 0 | 1 | 174 | 7.5 | 135 |
| 0 | 1 | 0 | 1 | 0 | 1 | 175 | 7.5 | 135 |
| 0 | 1 | 0 | 1 | 0 | 1 | 176 | 7.5 | 135 |
| 0 | 1 | 0 | 1 | 0 | 1 | 177 | 7.5 | 135 |
| 0 | 1 | 0 | 1 | 0 | 1 | 178 | 7.5 | 135 |
| 0 | 1 | 0 | 1 | 0 | 1 | 179 | 7.5 | 135 |
| 0 | 1 | 0 | 1 | 0 | 1 | 180 | 7.5 | 135 |
| 0 | 1 | 0 | 0 | 1 | 1 | 0   | 7.5 | 0   |
| 0 | 1 | 0 | 0 | 1 | 1 | 1   | 7.5 | 15  |
| 0 | 1 | 0 | 0 | 1 | 1 | 2   | 7.5 | 15  |
| 0 | 1 | 0 | 0 | 1 | 1 | 3   | 7.5 | 15  |
| 0 | 1 | 0 | 0 | 1 | 1 | 4   | 7.5 | 15  |
| 0 | 1 | 0 | 0 | 1 | 1 | 5   | 7.5 | 15  |
| 0 | 1 | 0 | 0 | 1 | 1 | 6   | 7.5 | 15  |
| 0 | 1 | 0 | 0 | 1 | 1 | 7   | 7.5 | 15  |
| 0 | 1 | 0 | 0 | 1 | 1 | 8   | 7.5 | 15  |
| 0 | 1 | 0 | 0 | 1 | 1 | 9   | 7.5 | 15  |
| 0 | 1 | 0 | 0 | 1 | 1 | 10  | 7.5 | 15  |
| 0 | 1 | 0 | 0 | 1 | 1 | 11  | 7.5 | 15  |
| 0 | 1 | 0 | 0 | 1 | 1 | 12  | 7.5 | 15  |
| 0 | 1 | 0 | 0 | 1 | 1 | 13  | 7.5 | 15  |
| 0 | 1 | 0 | 0 | 1 | 1 | 14  | 7.5 | 15  |
| 0 | 1 | 0 | 0 | 1 | 1 | 15  | 7.5 | 15  |

|   |   |   |   |   |   |    |     |    |
|---|---|---|---|---|---|----|-----|----|
| 0 | 1 | 0 | 0 | 1 | 1 | 16 | 7.5 | 15 |
| 0 | 1 | 0 | 0 | 1 | 1 | 17 | 7.5 | 15 |
| 0 | 1 | 0 | 0 | 1 | 1 | 18 | 7.5 | 15 |
| 0 | 1 | 0 | 0 | 1 | 1 | 19 | 7.5 | 15 |
| 0 | 1 | 0 | 0 | 1 | 1 | 20 | 7.5 | 15 |
| 0 | 1 | 0 | 0 | 1 | 1 | 21 | 7.5 | 15 |
| 0 | 1 | 0 | 0 | 1 | 1 | 22 | 7.5 | 15 |
| 0 | 1 | 0 | 0 | 1 | 1 | 23 | 7.5 | 15 |
| 0 | 1 | 0 | 0 | 1 | 1 | 24 | 7.5 | 15 |
| 0 | 1 | 0 | 0 | 1 | 1 | 25 | 7.5 | 15 |
| 0 | 1 | 0 | 0 | 1 | 1 | 26 | 7.5 | 15 |
| 0 | 1 | 0 | 0 | 1 | 1 | 27 | 7.5 | 15 |
| 0 | 1 | 0 | 0 | 1 | 1 | 28 | 7.5 | 15 |
| 0 | 1 | 0 | 0 | 1 | 1 | 29 | 7.5 | 15 |
| 0 | 1 | 0 | 0 | 1 | 1 | 30 | 7.5 | 15 |
| 0 | 1 | 0 | 0 | 1 | 1 | 31 | 7.5 | 15 |
| 0 | 1 | 0 | 0 | 1 | 1 | 32 | 7.5 | 15 |
| 0 | 1 | 0 | 0 | 1 | 1 | 33 | 7.5 | 15 |
| 0 | 1 | 0 | 0 | 1 | 1 | 34 | 7.5 | 15 |
| 0 | 1 | 0 | 0 | 1 | 1 | 35 | 7.5 | 15 |
| 0 | 1 | 0 | 0 | 1 | 1 | 36 | 7.5 | 15 |
| 0 | 1 | 0 | 0 | 1 | 1 | 37 | 7.5 | 15 |
| 0 | 1 | 0 | 0 | 1 | 1 | 38 | 7.5 | 15 |
| 0 | 1 | 0 | 0 | 1 | 1 | 39 | 7.5 | 15 |
| 0 | 1 | 0 | 0 | 1 | 1 | 40 | 7.5 | 15 |
| 0 | 1 | 0 | 0 | 1 | 1 | 41 | 7.5 | 15 |
| 0 | 1 | 0 | 0 | 1 | 1 | 42 | 7.5 | 15 |
| 0 | 1 | 0 | 0 | 1 | 1 | 43 | 7.5 | 15 |
| 0 | 1 | 0 | 0 | 1 | 1 | 44 | 7.5 | 15 |
| 0 | 1 | 0 | 0 | 1 | 1 | 45 | 7.5 | 15 |
| 0 | 1 | 0 | 0 | 1 | 1 | 46 | 7.5 | 75 |
| 0 | 1 | 0 | 0 | 1 | 1 | 47 | 7.5 | 75 |
| 0 | 1 | 0 | 0 | 1 | 1 | 48 | 7.5 | 75 |
| 0 | 1 | 0 | 0 | 1 | 1 | 49 | 7.5 | 75 |
| 0 | 1 | 0 | 0 | 1 | 1 | 50 | 7.5 | 75 |
| 0 | 1 | 0 | 0 | 1 | 1 | 51 | 7.5 | 75 |
| 0 | 1 | 0 | 0 | 1 | 1 | 52 | 7.5 | 75 |
| 0 | 1 | 0 | 0 | 1 | 1 | 53 | 7.5 | 75 |
| 0 | 1 | 0 | 0 | 1 | 1 | 54 | 7.5 | 75 |
| 0 | 1 | 0 | 0 | 1 | 1 | 55 | 7.5 | 75 |
| 0 | 1 | 0 | 0 | 1 | 1 | 56 | 7.5 | 75 |
| 0 | 1 | 0 | 0 | 1 | 1 | 57 | 7.5 | 75 |
| 0 | 1 | 0 | 0 | 1 | 1 | 58 | 7.5 | 75 |
| 0 | 1 | 0 | 0 | 1 | 1 | 59 | 7.5 | 75 |
| 0 | 1 | 0 | 0 | 1 | 1 | 60 | 7.5 | 75 |
| 0 | 1 | 0 | 0 | 1 | 1 | 61 | 7.5 | 75 |

|   |   |   |   |   |   |     |     |     |
|---|---|---|---|---|---|-----|-----|-----|
| 0 | 1 | 0 | 0 | 1 | 1 | 62  | 7.5 | 75  |
| 0 | 1 | 0 | 0 | 1 | 1 | 63  | 7.5 | 75  |
| 0 | 1 | 0 | 0 | 1 | 1 | 64  | 7.5 | 75  |
| 0 | 1 | 0 | 0 | 1 | 1 | 65  | 7.5 | 75  |
| 0 | 1 | 0 | 0 | 1 | 1 | 66  | 7.5 | 75  |
| 0 | 1 | 0 | 0 | 1 | 1 | 67  | 7.5 | 75  |
| 0 | 1 | 0 | 0 | 1 | 1 | 68  | 7.5 | 75  |
| 0 | 1 | 0 | 0 | 1 | 1 | 69  | 7.5 | 75  |
| 0 | 1 | 0 | 0 | 1 | 1 | 70  | 7.5 | 75  |
| 0 | 1 | 0 | 0 | 1 | 1 | 71  | 7.5 | 75  |
| 0 | 1 | 0 | 0 | 1 | 1 | 72  | 7.5 | 75  |
| 0 | 1 | 0 | 0 | 1 | 1 | 73  | 7.5 | 75  |
| 0 | 1 | 0 | 0 | 1 | 1 | 74  | 7.5 | 75  |
| 0 | 1 | 0 | 0 | 1 | 1 | 75  | 7.5 | 75  |
| 0 | 1 | 0 | 0 | 1 | 1 | 76  | 7.5 | 75  |
| 0 | 1 | 0 | 0 | 1 | 1 | 77  | 7.5 | 75  |
| 0 | 1 | 0 | 0 | 1 | 1 | 78  | 7.5 | 75  |
| 0 | 1 | 0 | 0 | 1 | 1 | 79  | 7.5 | 75  |
| 0 | 1 | 0 | 0 | 1 | 1 | 80  | 7.5 | 75  |
| 0 | 1 | 0 | 0 | 1 | 1 | 81  | 7.5 | 75  |
| 0 | 1 | 0 | 0 | 1 | 1 | 82  | 7.5 | 75  |
| 0 | 1 | 0 | 0 | 1 | 1 | 83  | 7.5 | 75  |
| 0 | 1 | 0 | 0 | 1 | 1 | 84  | 7.5 | 75  |
| 0 | 1 | 0 | 0 | 1 | 1 | 85  | 7.5 | 75  |
| 0 | 1 | 0 | 0 | 1 | 1 | 86  | 7.5 | 75  |
| 0 | 1 | 0 | 0 | 1 | 1 | 87  | 7.5 | 75  |
| 0 | 1 | 0 | 0 | 1 | 1 | 88  | 7.5 | 75  |
| 0 | 1 | 0 | 0 | 1 | 1 | 89  | 7.5 | 75  |
| 0 | 1 | 0 | 0 | 1 | 1 | 90  | 7.5 | 90  |
| 0 | 1 | 0 | 0 | 1 | 1 | 91  | 7.5 | 105 |
| 0 | 1 | 0 | 0 | 1 | 1 | 92  | 7.5 | 105 |
| 0 | 1 | 0 | 0 | 1 | 1 | 93  | 7.5 | 105 |
| 0 | 1 | 0 | 0 | 1 | 1 | 94  | 7.5 | 105 |
| 0 | 1 | 0 | 0 | 1 | 1 | 95  | 7.5 | 105 |
| 0 | 1 | 0 | 0 | 1 | 1 | 96  | 7.5 | 105 |
| 0 | 1 | 0 | 0 | 1 | 1 | 97  | 7.5 | 105 |
| 0 | 1 | 0 | 0 | 1 | 1 | 98  | 7.5 | 105 |
| 0 | 1 | 0 | 0 | 1 | 1 | 99  | 7.5 | 105 |
| 0 | 1 | 0 | 0 | 1 | 1 | 100 | 7.5 | 105 |
| 0 | 1 | 0 | 0 | 1 | 1 | 101 | 7.5 | 105 |
| 0 | 1 | 0 | 0 | 1 | 1 | 102 | 7.5 | 105 |
| 0 | 1 | 0 | 0 | 1 | 1 | 103 | 7.5 | 105 |
| 0 | 1 | 0 | 0 | 1 | 1 | 104 | 7.5 | 105 |
| 0 | 1 | 0 | 0 | 1 | 1 | 105 | 7.5 | 105 |
| 0 | 1 | 0 | 0 | 1 | 1 | 106 | 7.5 | 105 |
| 0 | 1 | 0 | 0 | 1 | 1 | 107 | 7.5 | 105 |

|   |   |   |   |   |   |     |     |     |
|---|---|---|---|---|---|-----|-----|-----|
| 0 | 1 | 0 | 0 | 1 | 1 | 108 | 7.5 | 105 |
| 0 | 1 | 0 | 0 | 1 | 1 | 109 | 7.5 | 105 |
| 0 | 1 | 0 | 0 | 1 | 1 | 110 | 7.5 | 105 |
| 0 | 1 | 0 | 0 | 1 | 1 | 111 | 7.5 | 105 |
| 0 | 1 | 0 | 0 | 1 | 1 | 112 | 7.5 | 105 |
| 0 | 1 | 0 | 0 | 1 | 1 | 113 | 7.5 | 105 |
| 0 | 1 | 0 | 0 | 1 | 1 | 114 | 7.5 | 105 |
| 0 | 1 | 0 | 0 | 1 | 1 | 115 | 7.5 | 105 |
| 0 | 1 | 0 | 0 | 1 | 1 | 116 | 7.5 | 105 |
| 0 | 1 | 0 | 0 | 1 | 1 | 117 | 7.5 | 105 |
| 0 | 1 | 0 | 0 | 1 | 1 | 118 | 7.5 | 105 |
| 0 | 1 | 0 | 0 | 1 | 1 | 119 | 7.5 | 105 |
| 0 | 1 | 0 | 0 | 1 | 1 | 120 | 7.5 | 105 |
| 0 | 1 | 0 | 0 | 1 | 1 | 121 | 7.5 | 105 |
| 0 | 1 | 0 | 0 | 1 | 1 | 122 | 7.5 | 105 |
| 0 | 1 | 0 | 0 | 1 | 1 | 123 | 7.5 | 105 |
| 0 | 1 | 0 | 0 | 1 | 1 | 124 | 7.5 | 105 |
| 0 | 1 | 0 | 0 | 1 | 1 | 125 | 7.5 | 105 |
| 0 | 1 | 0 | 0 | 1 | 1 | 126 | 7.5 | 105 |
| 0 | 1 | 0 | 0 | 1 | 1 | 127 | 7.5 | 105 |
| 0 | 1 | 0 | 0 | 1 | 1 | 128 | 7.5 | 105 |
| 0 | 1 | 0 | 0 | 1 | 1 | 129 | 7.5 | 105 |
| 0 | 1 | 0 | 0 | 1 | 1 | 130 | 7.5 | 105 |
| 0 | 1 | 0 | 0 | 1 | 1 | 131 | 7.5 | 105 |
| 0 | 1 | 0 | 0 | 1 | 1 | 132 | 7.5 | 105 |
| 0 | 1 | 0 | 0 | 1 | 1 | 133 | 7.5 | 105 |
| 0 | 1 | 0 | 0 | 1 | 1 | 134 | 7.5 | 105 |
| 0 | 1 | 0 | 0 | 1 | 1 | 135 | 7.5 | 105 |
| 0 | 1 | 0 | 0 | 1 | 1 | 136 | 7.5 | 105 |
| 0 | 1 | 0 | 0 | 1 | 1 | 137 | 7.5 | 105 |
| 0 | 1 | 0 | 0 | 1 | 1 | 138 | 7.5 | 105 |
| 0 | 1 | 0 | 0 | 1 | 1 | 139 | 7.5 | 105 |
| 0 | 1 | 0 | 0 | 1 | 1 | 140 | 7.5 | 105 |
| 0 | 1 | 0 | 0 | 1 | 1 | 141 | 7.5 | 105 |
| 0 | 1 | 0 | 0 | 1 | 1 | 142 | 7.5 | 105 |
| 0 | 1 | 0 | 0 | 1 | 1 | 143 | 7.5 | 105 |
| 0 | 1 | 0 | 0 | 1 | 1 | 144 | 7.5 | 105 |
| 0 | 1 | 0 | 0 | 1 | 1 | 145 | 7.5 | 105 |
| 0 | 1 | 0 | 0 | 1 | 1 | 146 | 7.5 | 105 |
| 0 | 1 | 0 | 0 | 1 | 1 | 147 | 7.5 | 105 |
| 0 | 1 | 0 | 0 | 1 | 1 | 148 | 7.5 | 105 |
| 0 | 1 | 0 | 0 | 1 | 1 | 149 | 7.5 | 105 |
| 0 | 1 | 0 | 0 | 1 | 1 | 150 | 7.5 | 105 |
| 0 | 1 | 0 | 0 | 1 | 1 | 151 | 7.5 | 105 |
| 0 | 1 | 0 | 0 | 1 | 1 | 152 | 7.5 | 105 |
| 0 | 1 | 0 | 0 | 1 | 1 | 153 | 7.5 | 105 |

|   |   |   |   |   |   |     |     |     |
|---|---|---|---|---|---|-----|-----|-----|
| 0 | 1 | 0 | 0 | 1 | 1 | 154 | 7.5 | 105 |
| 0 | 1 | 0 | 0 | 1 | 1 | 155 | 7.5 | 105 |
| 0 | 1 | 0 | 0 | 1 | 1 | 156 | 7.5 | 105 |
| 0 | 1 | 0 | 0 | 1 | 1 | 157 | 7.5 | 105 |
| 0 | 1 | 0 | 0 | 1 | 1 | 158 | 7.5 | 105 |
| 0 | 1 | 0 | 0 | 1 | 1 | 159 | 7.5 | 105 |
| 0 | 1 | 0 | 0 | 1 | 1 | 160 | 7.5 | 105 |
| 0 | 1 | 0 | 0 | 1 | 1 | 161 | 7.5 | 105 |
| 0 | 1 | 0 | 0 | 1 | 1 | 162 | 7.5 | 105 |
| 0 | 1 | 0 | 0 | 1 | 1 | 163 | 7.5 | 105 |
| 0 | 1 | 0 | 0 | 1 | 1 | 164 | 7.5 | 105 |
| 0 | 1 | 0 | 0 | 1 | 1 | 165 | 7.5 | 105 |
| 0 | 1 | 0 | 0 | 1 | 1 | 166 | 7.5 | 105 |
| 0 | 1 | 0 | 0 | 1 | 1 | 167 | 7.5 | 105 |
| 0 | 1 | 0 | 0 | 1 | 1 | 168 | 7.5 | 105 |
| 0 | 1 | 0 | 0 | 1 | 1 | 169 | 7.5 | 105 |
| 0 | 1 | 0 | 0 | 1 | 1 | 170 | 7.5 | 105 |
| 0 | 1 | 0 | 0 | 1 | 1 | 171 | 7.5 | 105 |
| 0 | 1 | 0 | 0 | 1 | 1 | 172 | 7.5 | 105 |
| 0 | 1 | 0 | 0 | 1 | 1 | 173 | 7.5 | 105 |
| 0 | 1 | 0 | 0 | 1 | 1 | 174 | 7.5 | 105 |
| 0 | 1 | 0 | 0 | 1 | 1 | 175 | 7.5 | 105 |
| 0 | 1 | 0 | 0 | 1 | 1 | 176 | 7.5 | 105 |
| 0 | 1 | 0 | 0 | 1 | 1 | 177 | 7.5 | 105 |
| 0 | 1 | 0 | 0 | 1 | 1 | 178 | 7.5 | 105 |
| 0 | 1 | 0 | 0 | 1 | 1 | 179 | 7.5 | 105 |
| 0 | 1 | 0 | 0 | 1 | 1 | 180 | 7.5 | 105 |
| 0 | 0 | 1 | 1 | 1 | 0 | 0   | 7.5 | 0   |
| 0 | 0 | 1 | 1 | 1 | 0 | 1   | 7.5 | 15  |
| 0 | 0 | 1 | 1 | 1 | 0 | 2   | 7.5 | 15  |
| 0 | 0 | 1 | 1 | 1 | 0 | 3   | 7.5 | 15  |
| 0 | 0 | 1 | 1 | 1 | 0 | 4   | 7.5 | 15  |
| 0 | 0 | 1 | 1 | 1 | 0 | 5   | 7.5 | 15  |
| 0 | 0 | 1 | 1 | 1 | 0 | 6   | 7.5 | 15  |
| 0 | 0 | 1 | 1 | 1 | 0 | 7   | 7.5 | 15  |
| 0 | 0 | 1 | 1 | 1 | 0 | 8   | 7.5 | 15  |
| 0 | 0 | 1 | 1 | 1 | 0 | 9   | 7.5 | 15  |
| 0 | 0 | 1 | 1 | 1 | 0 | 10  | 7.5 | 15  |
| 0 | 0 | 1 | 1 | 1 | 0 | 11  | 7.5 | 15  |
| 0 | 0 | 1 | 1 | 1 | 0 | 12  | 7.5 | 15  |
| 0 | 0 | 1 | 1 | 1 | 0 | 13  | 7.5 | 15  |
| 0 | 0 | 1 | 1 | 1 | 0 | 14  | 7.5 | 15  |
| 0 | 0 | 1 | 1 | 1 | 0 | 15  | 7.5 | 15  |
| 0 | 0 | 1 | 1 | 1 | 0 | 16  | 7.5 | 15  |
| 0 | 0 | 1 | 1 | 1 | 0 | 17  | 7.5 | 15  |
| 0 | 0 | 1 | 1 | 1 | 0 | 18  | 7.5 | 15  |

|   |   |   |   |   |   |    |     |    |
|---|---|---|---|---|---|----|-----|----|
| 0 | 0 | 1 | 1 | 1 | 0 | 19 | 7.5 | 15 |
| 0 | 0 | 1 | 1 | 1 | 0 | 20 | 7.5 | 15 |
| 0 | 0 | 1 | 1 | 1 | 0 | 21 | 7.5 | 15 |
| 0 | 0 | 1 | 1 | 1 | 0 | 22 | 7.5 | 15 |
| 0 | 0 | 1 | 1 | 1 | 0 | 23 | 7.5 | 15 |
| 0 | 0 | 1 | 1 | 1 | 0 | 24 | 7.5 | 15 |
| 0 | 0 | 1 | 1 | 1 | 0 | 25 | 7.5 | 15 |
| 0 | 0 | 1 | 1 | 1 | 0 | 26 | 7.5 | 15 |
| 0 | 0 | 1 | 1 | 1 | 0 | 27 | 7.5 | 15 |
| 0 | 0 | 1 | 1 | 1 | 0 | 28 | 7.5 | 15 |
| 0 | 0 | 1 | 1 | 1 | 0 | 29 | 7.5 | 15 |
| 0 | 0 | 1 | 1 | 1 | 0 | 30 | 7.5 | 30 |
| 0 | 0 | 1 | 1 | 1 | 0 | 31 | 7.5 | 45 |
| 0 | 0 | 1 | 1 | 1 | 0 | 32 | 7.5 | 45 |
| 0 | 0 | 1 | 1 | 1 | 0 | 33 | 7.5 | 45 |
| 0 | 0 | 1 | 1 | 1 | 0 | 34 | 7.5 | 45 |
| 0 | 0 | 1 | 1 | 1 | 0 | 35 | 7.5 | 45 |
| 0 | 0 | 1 | 1 | 1 | 0 | 36 | 7.5 | 45 |
| 0 | 0 | 1 | 1 | 1 | 0 | 37 | 7.5 | 45 |
| 0 | 0 | 1 | 1 | 1 | 0 | 38 | 7.5 | 45 |
| 0 | 0 | 1 | 1 | 1 | 0 | 39 | 7.5 | 45 |
| 0 | 0 | 1 | 1 | 1 | 0 | 40 | 7.5 | 45 |
| 0 | 0 | 1 | 1 | 1 | 0 | 41 | 7.5 | 45 |
| 0 | 0 | 1 | 1 | 1 | 0 | 42 | 7.5 | 45 |
| 0 | 0 | 1 | 1 | 1 | 0 | 43 | 7.5 | 45 |
| 0 | 0 | 1 | 1 | 1 | 0 | 44 | 7.5 | 45 |
| 0 | 0 | 1 | 1 | 1 | 0 | 45 | 7.5 | 45 |
| 0 | 0 | 1 | 1 | 1 | 0 | 46 | 7.5 | 45 |
| 0 | 0 | 1 | 1 | 1 | 0 | 47 | 7.5 | 45 |
| 0 | 0 | 1 | 1 | 1 | 0 | 48 | 7.5 | 45 |
| 0 | 0 | 1 | 1 | 1 | 0 | 49 | 7.5 | 45 |
| 0 | 0 | 1 | 1 | 1 | 0 | 50 | 7.5 | 45 |
| 0 | 0 | 1 | 1 | 1 | 0 | 51 | 7.5 | 45 |
| 0 | 0 | 1 | 1 | 1 | 0 | 52 | 7.5 | 45 |
| 0 | 0 | 1 | 1 | 1 | 0 | 53 | 7.5 | 45 |
| 0 | 0 | 1 | 1 | 1 | 0 | 54 | 7.5 | 45 |
| 0 | 0 | 1 | 1 | 1 | 0 | 55 | 7.5 | 45 |
| 0 | 0 | 1 | 1 | 1 | 0 | 56 | 7.5 | 45 |
| 0 | 0 | 1 | 1 | 1 | 0 | 57 | 7.5 | 45 |
| 0 | 0 | 1 | 1 | 1 | 0 | 58 | 7.5 | 45 |
| 0 | 0 | 1 | 1 | 1 | 0 | 59 | 7.5 | 45 |
| 0 | 0 | 1 | 1 | 1 | 0 | 60 | 7.5 | 45 |
| 0 | 0 | 1 | 1 | 1 | 0 | 61 | 7.5 | 45 |
| 0 | 0 | 1 | 1 | 1 | 0 | 62 | 7.5 | 45 |
| 0 | 0 | 1 | 1 | 1 | 0 | 63 | 7.5 | 45 |
| 0 | 0 | 1 | 1 | 1 | 0 | 64 | 7.5 | 45 |

|   |   |   |   |   |   |     |     |     |
|---|---|---|---|---|---|-----|-----|-----|
| 0 | 0 | 1 | 1 | 1 | 0 | 65  | 7.5 | 45  |
| 0 | 0 | 1 | 1 | 1 | 0 | 66  | 7.5 | 45  |
| 0 | 0 | 1 | 1 | 1 | 0 | 67  | 7.5 | 45  |
| 0 | 0 | 1 | 1 | 1 | 0 | 68  | 7.5 | 45  |
| 0 | 0 | 1 | 1 | 1 | 0 | 69  | 7.5 | 45  |
| 0 | 0 | 1 | 1 | 1 | 0 | 70  | 7.5 | 45  |
| 0 | 0 | 1 | 1 | 1 | 0 | 71  | 7.5 | 45  |
| 0 | 0 | 1 | 1 | 1 | 0 | 72  | 7.5 | 45  |
| 0 | 0 | 1 | 1 | 1 | 0 | 73  | 7.5 | 45  |
| 0 | 0 | 1 | 1 | 1 | 0 | 74  | 7.5 | 45  |
| 0 | 0 | 1 | 1 | 1 | 0 | 75  | 7.5 | 45  |
| 0 | 0 | 1 | 1 | 1 | 0 | 76  | 7.5 | 45  |
| 0 | 0 | 1 | 1 | 1 | 0 | 77  | 7.5 | 45  |
| 0 | 0 | 1 | 1 | 1 | 0 | 78  | 7.5 | 45  |
| 0 | 0 | 1 | 1 | 1 | 0 | 79  | 7.5 | 45  |
| 0 | 0 | 1 | 1 | 1 | 0 | 80  | 7.5 | 45  |
| 0 | 0 | 1 | 1 | 1 | 0 | 81  | 7.5 | 45  |
| 0 | 0 | 1 | 1 | 1 | 0 | 82  | 7.5 | 45  |
| 0 | 0 | 1 | 1 | 1 | 0 | 83  | 7.5 | 45  |
| 0 | 0 | 1 | 1 | 1 | 0 | 84  | 7.5 | 45  |
| 0 | 0 | 1 | 1 | 1 | 0 | 85  | 7.5 | 45  |
| 0 | 0 | 1 | 1 | 1 | 0 | 86  | 7.5 | 45  |
| 0 | 0 | 1 | 1 | 1 | 0 | 87  | 7.5 | 45  |
| 0 | 0 | 1 | 1 | 1 | 0 | 88  | 7.5 | 45  |
| 0 | 0 | 1 | 1 | 1 | 0 | 89  | 7.5 | 45  |
| 0 | 0 | 1 | 1 | 1 | 0 | 90  | 7.5 | 45  |
| 0 | 0 | 1 | 1 | 1 | 0 | 91  | 7.5 | 45  |
| 0 | 0 | 1 | 1 | 1 | 0 | 92  | 7.5 | 45  |
| 0 | 0 | 1 | 1 | 1 | 0 | 93  | 7.5 | 45  |
| 0 | 0 | 1 | 1 | 1 | 0 | 94  | 7.5 | 45  |
| 0 | 0 | 1 | 1 | 1 | 0 | 95  | 7.5 | 45  |
| 0 | 0 | 1 | 1 | 1 | 0 | 96  | 7.5 | 45  |
| 0 | 0 | 1 | 1 | 1 | 0 | 97  | 7.5 | 45  |
| 0 | 0 | 1 | 1 | 1 | 0 | 98  | 7.5 | 45  |
| 0 | 0 | 1 | 1 | 1 | 0 | 99  | 7.5 | 45  |
| 0 | 0 | 1 | 1 | 1 | 0 | 100 | 7.5 | 45  |
| 0 | 0 | 1 | 1 | 1 | 0 | 101 | 7.5 | 45  |
| 0 | 0 | 1 | 1 | 1 | 0 | 102 | 7.5 | 45  |
| 0 | 0 | 1 | 1 | 1 | 0 | 103 | 7.5 | 45  |
| 0 | 0 | 1 | 1 | 1 | 0 | 104 | 7.5 | 45  |
| 0 | 0 | 1 | 1 | 1 | 0 | 105 | 7.5 | 45  |
| 0 | 0 | 1 | 1 | 1 | 0 | 106 | 7.5 | 165 |
| 0 | 0 | 1 | 1 | 1 | 0 | 107 | 7.5 | 165 |
| 0 | 0 | 1 | 1 | 1 | 0 | 108 | 7.5 | 165 |
| 0 | 0 | 1 | 1 | 1 | 0 | 109 | 7.5 | 165 |
| 0 | 0 | 1 | 1 | 1 | 0 | 110 | 7.5 | 165 |

|   |   |   |   |   |   |     |     |     |
|---|---|---|---|---|---|-----|-----|-----|
| 0 | 0 | 1 | 1 | 1 | 0 | 111 | 7.5 | 165 |
| 0 | 0 | 1 | 1 | 1 | 0 | 112 | 7.5 | 165 |
| 0 | 0 | 1 | 1 | 1 | 0 | 113 | 7.5 | 165 |
| 0 | 0 | 1 | 1 | 1 | 0 | 114 | 7.5 | 165 |
| 0 | 0 | 1 | 1 | 1 | 0 | 115 | 7.5 | 165 |
| 0 | 0 | 1 | 1 | 1 | 0 | 116 | 7.5 | 165 |
| 0 | 0 | 1 | 1 | 1 | 0 | 117 | 7.5 | 165 |
| 0 | 0 | 1 | 1 | 1 | 0 | 118 | 7.5 | 165 |
| 0 | 0 | 1 | 1 | 1 | 0 | 119 | 7.5 | 165 |
| 0 | 0 | 1 | 1 | 1 | 0 | 120 | 7.5 | 165 |
| 0 | 0 | 1 | 1 | 1 | 0 | 121 | 7.5 | 165 |
| 0 | 0 | 1 | 1 | 1 | 0 | 122 | 7.5 | 165 |
| 0 | 0 | 1 | 1 | 1 | 0 | 123 | 7.5 | 165 |
| 0 | 0 | 1 | 1 | 1 | 0 | 124 | 7.5 | 165 |
| 0 | 0 | 1 | 1 | 1 | 0 | 125 | 7.5 | 165 |
| 0 | 0 | 1 | 1 | 1 | 0 | 126 | 7.5 | 165 |
| 0 | 0 | 1 | 1 | 1 | 0 | 127 | 7.5 | 165 |
| 0 | 0 | 1 | 1 | 1 | 0 | 128 | 7.5 | 165 |
| 0 | 0 | 1 | 1 | 1 | 0 | 129 | 7.5 | 165 |
| 0 | 0 | 1 | 1 | 1 | 0 | 130 | 7.5 | 165 |
| 0 | 0 | 1 | 1 | 1 | 0 | 131 | 7.5 | 165 |
| 0 | 0 | 1 | 1 | 1 | 0 | 132 | 7.5 | 165 |
| 0 | 0 | 1 | 1 | 1 | 0 | 133 | 7.5 | 165 |
| 0 | 0 | 1 | 1 | 1 | 0 | 134 | 7.5 | 165 |
| 0 | 0 | 1 | 1 | 1 | 0 | 135 | 7.5 | 165 |
| 0 | 0 | 1 | 1 | 1 | 0 | 136 | 7.5 | 165 |
| 0 | 0 | 1 | 1 | 1 | 0 | 137 | 7.5 | 165 |
| 0 | 0 | 1 | 1 | 1 | 0 | 138 | 7.5 | 165 |
| 0 | 0 | 1 | 1 | 1 | 0 | 139 | 7.5 | 165 |
| 0 | 0 | 1 | 1 | 1 | 0 | 140 | 7.5 | 165 |
| 0 | 0 | 1 | 1 | 1 | 0 | 141 | 7.5 | 165 |
| 0 | 0 | 1 | 1 | 1 | 0 | 142 | 7.5 | 165 |
| 0 | 0 | 1 | 1 | 1 | 0 | 143 | 7.5 | 165 |
| 0 | 0 | 1 | 1 | 1 | 0 | 144 | 7.5 | 165 |
| 0 | 0 | 1 | 1 | 1 | 0 | 145 | 7.5 | 165 |
| 0 | 0 | 1 | 1 | 1 | 0 | 146 | 7.5 | 165 |
| 0 | 0 | 1 | 1 | 1 | 0 | 147 | 7.5 | 165 |
| 0 | 0 | 1 | 1 | 1 | 0 | 148 | 7.5 | 165 |
| 0 | 0 | 1 | 1 | 1 | 0 | 149 | 7.5 | 165 |
| 0 | 0 | 1 | 1 | 1 | 0 | 150 | 7.5 | 165 |
| 0 | 0 | 1 | 1 | 1 | 0 | 151 | 7.5 | 165 |
| 0 | 0 | 1 | 1 | 1 | 0 | 152 | 7.5 | 165 |
| 0 | 0 | 1 | 1 | 1 | 0 | 153 | 7.5 | 165 |
| 0 | 0 | 1 | 1 | 1 | 0 | 154 | 7.5 | 165 |
| 0 | 0 | 1 | 1 | 1 | 0 | 155 | 7.5 | 165 |
| 0 | 0 | 1 | 1 | 1 | 0 | 156 | 7.5 | 165 |

|   |   |   |   |   |   |     |     |     |
|---|---|---|---|---|---|-----|-----|-----|
| 0 | 0 | 1 | 1 | 1 | 0 | 157 | 7.5 | 165 |
| 0 | 0 | 1 | 1 | 1 | 0 | 158 | 7.5 | 165 |
| 0 | 0 | 1 | 1 | 1 | 0 | 159 | 7.5 | 165 |
| 0 | 0 | 1 | 1 | 1 | 0 | 160 | 7.5 | 165 |
| 0 | 0 | 1 | 1 | 1 | 0 | 161 | 7.5 | 165 |
| 0 | 0 | 1 | 1 | 1 | 0 | 162 | 7.5 | 165 |
| 0 | 0 | 1 | 1 | 1 | 0 | 163 | 7.5 | 165 |
| 0 | 0 | 1 | 1 | 1 | 0 | 164 | 7.5 | 165 |
| 0 | 0 | 1 | 1 | 1 | 0 | 165 | 7.5 | 165 |
| 0 | 0 | 1 | 1 | 1 | 0 | 166 | 7.5 | 165 |
| 0 | 0 | 1 | 1 | 1 | 0 | 167 | 7.5 | 165 |
| 0 | 0 | 1 | 1 | 1 | 0 | 168 | 7.5 | 165 |
| 0 | 0 | 1 | 1 | 1 | 0 | 169 | 7.5 | 165 |
| 0 | 0 | 1 | 1 | 1 | 0 | 170 | 7.5 | 165 |
| 0 | 0 | 1 | 1 | 1 | 0 | 171 | 7.5 | 165 |
| 0 | 0 | 1 | 1 | 1 | 0 | 172 | 7.5 | 165 |
| 0 | 0 | 1 | 1 | 1 | 0 | 173 | 7.5 | 165 |
| 0 | 0 | 1 | 1 | 1 | 0 | 174 | 7.5 | 165 |
| 0 | 0 | 1 | 1 | 1 | 0 | 175 | 7.5 | 165 |
| 0 | 0 | 1 | 1 | 1 | 0 | 176 | 7.5 | 165 |
| 0 | 0 | 1 | 1 | 1 | 0 | 177 | 7.5 | 165 |
| 0 | 0 | 1 | 1 | 1 | 0 | 178 | 7.5 | 165 |
| 0 | 0 | 1 | 1 | 1 | 0 | 179 | 7.5 | 165 |
| 0 | 0 | 1 | 1 | 1 | 0 | 180 | 7.5 | 180 |
| 0 | 0 | 1 | 1 | 0 | 1 | 0   | 7.5 | 0   |
| 0 | 0 | 1 | 1 | 0 | 1 | 1   | 7.5 | 15  |
| 0 | 0 | 1 | 1 | 0 | 1 | 2   | 7.5 | 15  |
| 0 | 0 | 1 | 1 | 0 | 1 | 3   | 7.5 | 15  |
| 0 | 0 | 1 | 1 | 0 | 1 | 4   | 7.5 | 15  |
| 0 | 0 | 1 | 1 | 0 | 1 | 5   | 7.5 | 15  |
| 0 | 0 | 1 | 1 | 0 | 1 | 6   | 7.5 | 15  |
| 0 | 0 | 1 | 1 | 0 | 1 | 7   | 7.5 | 15  |
| 0 | 0 | 1 | 1 | 0 | 1 | 8   | 7.5 | 15  |
| 0 | 0 | 1 | 1 | 0 | 1 | 9   | 7.5 | 15  |
| 0 | 0 | 1 | 1 | 0 | 1 | 10  | 7.5 | 15  |
| 0 | 0 | 1 | 1 | 0 | 1 | 11  | 7.5 | 15  |
| 0 | 0 | 1 | 1 | 0 | 1 | 12  | 7.5 | 15  |
| 0 | 0 | 1 | 1 | 0 | 1 | 13  | 7.5 | 15  |
| 0 | 0 | 1 | 1 | 0 | 1 | 14  | 7.5 | 15  |
| 0 | 0 | 1 | 1 | 0 | 1 | 15  | 7.5 | 15  |
| 0 | 0 | 1 | 1 | 0 | 1 | 16  | 7.5 | 15  |
| 0 | 0 | 1 | 1 | 0 | 1 | 17  | 7.5 | 15  |
| 0 | 0 | 1 | 1 | 0 | 1 | 18  | 7.5 | 15  |
| 0 | 0 | 1 | 1 | 0 | 1 | 19  | 7.5 | 15  |
| 0 | 0 | 1 | 1 | 0 | 1 | 20  | 7.5 | 15  |
| 0 | 0 | 1 | 1 | 0 | 1 | 21  | 7.5 | 15  |

|   |   |   |   |   |   |    |     |    |
|---|---|---|---|---|---|----|-----|----|
| 0 | 0 | 1 | 1 | 0 | 1 | 22 | 7.5 | 15 |
| 0 | 0 | 1 | 1 | 0 | 1 | 23 | 7.5 | 15 |
| 0 | 0 | 1 | 1 | 0 | 1 | 24 | 7.5 | 15 |
| 0 | 0 | 1 | 1 | 0 | 1 | 25 | 7.5 | 15 |
| 0 | 0 | 1 | 1 | 0 | 1 | 26 | 7.5 | 15 |
| 0 | 0 | 1 | 1 | 0 | 1 | 27 | 7.5 | 15 |
| 0 | 0 | 1 | 1 | 0 | 1 | 28 | 7.5 | 15 |
| 0 | 0 | 1 | 1 | 0 | 1 | 29 | 7.5 | 15 |
| 0 | 0 | 1 | 1 | 0 | 1 | 30 | 7.5 | 30 |
| 0 | 0 | 1 | 1 | 0 | 1 | 31 | 7.5 | 45 |
| 0 | 0 | 1 | 1 | 0 | 1 | 32 | 7.5 | 45 |
| 0 | 0 | 1 | 1 | 0 | 1 | 33 | 7.5 | 45 |
| 0 | 0 | 1 | 1 | 0 | 1 | 34 | 7.5 | 45 |
| 0 | 0 | 1 | 1 | 0 | 1 | 35 | 7.5 | 45 |
| 0 | 0 | 1 | 1 | 0 | 1 | 36 | 7.5 | 45 |
| 0 | 0 | 1 | 1 | 0 | 1 | 37 | 7.5 | 45 |
| 0 | 0 | 1 | 1 | 0 | 1 | 38 | 7.5 | 45 |
| 0 | 0 | 1 | 1 | 0 | 1 | 39 | 7.5 | 45 |
| 0 | 0 | 1 | 1 | 0 | 1 | 40 | 7.5 | 45 |
| 0 | 0 | 1 | 1 | 0 | 1 | 41 | 7.5 | 45 |
| 0 | 0 | 1 | 1 | 0 | 1 | 42 | 7.5 | 45 |
| 0 | 0 | 1 | 1 | 0 | 1 | 43 | 7.5 | 45 |
| 0 | 0 | 1 | 1 | 0 | 1 | 44 | 7.5 | 45 |
| 0 | 0 | 1 | 1 | 0 | 1 | 45 | 7.5 | 45 |
| 0 | 0 | 1 | 1 | 0 | 1 | 46 | 7.5 | 45 |
| 0 | 0 | 1 | 1 | 0 | 1 | 47 | 7.5 | 45 |
| 0 | 0 | 1 | 1 | 0 | 1 | 48 | 7.5 | 45 |
| 0 | 0 | 1 | 1 | 0 | 1 | 49 | 7.5 | 45 |
| 0 | 0 | 1 | 1 | 0 | 1 | 50 | 7.5 | 45 |
| 0 | 0 | 1 | 1 | 0 | 1 | 51 | 7.5 | 45 |
| 0 | 0 | 1 | 1 | 0 | 1 | 52 | 7.5 | 45 |
| 0 | 0 | 1 | 1 | 0 | 1 | 53 | 7.5 | 45 |
| 0 | 0 | 1 | 1 | 0 | 1 | 54 | 7.5 | 45 |
| 0 | 0 | 1 | 1 | 0 | 1 | 55 | 7.5 | 45 |
| 0 | 0 | 1 | 1 | 0 | 1 | 56 | 7.5 | 45 |
| 0 | 0 | 1 | 1 | 0 | 1 | 57 | 7.5 | 45 |
| 0 | 0 | 1 | 1 | 0 | 1 | 58 | 7.5 | 45 |
| 0 | 0 | 1 | 1 | 0 | 1 | 59 | 7.5 | 45 |
| 0 | 0 | 1 | 1 | 0 | 1 | 60 | 7.5 | 45 |
| 0 | 0 | 1 | 1 | 0 | 1 | 61 | 7.5 | 45 |
| 0 | 0 | 1 | 1 | 0 | 1 | 62 | 7.5 | 45 |
| 0 | 0 | 1 | 1 | 0 | 1 | 63 | 7.5 | 45 |
| 0 | 0 | 1 | 1 | 0 | 1 | 64 | 7.5 | 45 |
| 0 | 0 | 1 | 1 | 0 | 1 | 65 | 7.5 | 45 |
| 0 | 0 | 1 | 1 | 0 | 1 | 66 | 7.5 | 45 |
| 0 | 0 | 1 | 1 | 0 | 1 | 67 | 7.5 | 45 |

|   |   |   |   |   |   |     |     |     |
|---|---|---|---|---|---|-----|-----|-----|
| 0 | 0 | 1 | 1 | 0 | 1 | 68  | 7.5 | 45  |
| 0 | 0 | 1 | 1 | 0 | 1 | 69  | 7.5 | 45  |
| 0 | 0 | 1 | 1 | 0 | 1 | 70  | 7.5 | 45  |
| 0 | 0 | 1 | 1 | 0 | 1 | 71  | 7.5 | 45  |
| 0 | 0 | 1 | 1 | 0 | 1 | 72  | 7.5 | 45  |
| 0 | 0 | 1 | 1 | 0 | 1 | 73  | 7.5 | 45  |
| 0 | 0 | 1 | 1 | 0 | 1 | 74  | 7.5 | 45  |
| 0 | 0 | 1 | 1 | 0 | 1 | 75  | 7.5 | 45  |
| 0 | 0 | 1 | 1 | 0 | 1 | 76  | 7.5 | 45  |
| 0 | 0 | 1 | 1 | 0 | 1 | 77  | 7.5 | 45  |
| 0 | 0 | 1 | 1 | 0 | 1 | 78  | 7.5 | 45  |
| 0 | 0 | 1 | 1 | 0 | 1 | 79  | 7.5 | 45  |
| 0 | 0 | 1 | 1 | 0 | 1 | 80  | 7.5 | 45  |
| 0 | 0 | 1 | 1 | 0 | 1 | 81  | 7.5 | 45  |
| 0 | 0 | 1 | 1 | 0 | 1 | 82  | 7.5 | 45  |
| 0 | 0 | 1 | 1 | 0 | 1 | 83  | 7.5 | 45  |
| 0 | 0 | 1 | 1 | 0 | 1 | 84  | 7.5 | 45  |
| 0 | 0 | 1 | 1 | 0 | 1 | 85  | 7.5 | 45  |
| 0 | 0 | 1 | 1 | 0 | 1 | 86  | 7.5 | 45  |
| 0 | 0 | 1 | 1 | 0 | 1 | 87  | 7.5 | 45  |
| 0 | 0 | 1 | 1 | 0 | 1 | 88  | 7.5 | 45  |
| 0 | 0 | 1 | 1 | 0 | 1 | 89  | 7.5 | 45  |
| 0 | 0 | 1 | 1 | 0 | 1 | 90  | 7.5 | 135 |
| 0 | 0 | 1 | 1 | 0 | 1 | 91  | 7.5 | 135 |
| 0 | 0 | 1 | 1 | 0 | 1 | 92  | 7.5 | 135 |
| 0 | 0 | 1 | 1 | 0 | 1 | 93  | 7.5 | 135 |
| 0 | 0 | 1 | 1 | 0 | 1 | 94  | 7.5 | 135 |
| 0 | 0 | 1 | 1 | 0 | 1 | 95  | 7.5 | 135 |
| 0 | 0 | 1 | 1 | 0 | 1 | 96  | 7.5 | 135 |
| 0 | 0 | 1 | 1 | 0 | 1 | 97  | 7.5 | 135 |
| 0 | 0 | 1 | 1 | 0 | 1 | 98  | 7.5 | 135 |
| 0 | 0 | 1 | 1 | 0 | 1 | 99  | 7.5 | 135 |
| 0 | 0 | 1 | 1 | 0 | 1 | 100 | 7.5 | 135 |
| 0 | 0 | 1 | 1 | 0 | 1 | 101 | 7.5 | 135 |
| 0 | 0 | 1 | 1 | 0 | 1 | 102 | 7.5 | 135 |
| 0 | 0 | 1 | 1 | 0 | 1 | 103 | 7.5 | 135 |
| 0 | 0 | 1 | 1 | 0 | 1 | 104 | 7.5 | 135 |
| 0 | 0 | 1 | 1 | 0 | 1 | 105 | 7.5 | 135 |
| 0 | 0 | 1 | 1 | 0 | 1 | 106 | 7.5 | 135 |
| 0 | 0 | 1 | 1 | 0 | 1 | 107 | 7.5 | 135 |
| 0 | 0 | 1 | 1 | 0 | 1 | 108 | 7.5 | 135 |
| 0 | 0 | 1 | 1 | 0 | 1 | 109 | 7.5 | 135 |
| 0 | 0 | 1 | 1 | 0 | 1 | 110 | 7.5 | 135 |
| 0 | 0 | 1 | 1 | 0 | 1 | 111 | 7.5 | 135 |
| 0 | 0 | 1 | 1 | 0 | 1 | 112 | 7.5 | 135 |
| 0 | 0 | 1 | 1 | 0 | 1 | 113 | 7.5 | 135 |

|   |   |   |   |   |   |     |     |     |
|---|---|---|---|---|---|-----|-----|-----|
| 0 | 0 | 1 | 1 | 0 | 1 | 114 | 7.5 | 135 |
| 0 | 0 | 1 | 1 | 0 | 1 | 115 | 7.5 | 135 |
| 0 | 0 | 1 | 1 | 0 | 1 | 116 | 7.5 | 135 |
| 0 | 0 | 1 | 1 | 0 | 1 | 117 | 7.5 | 135 |
| 0 | 0 | 1 | 1 | 0 | 1 | 118 | 7.5 | 135 |
| 0 | 0 | 1 | 1 | 0 | 1 | 119 | 7.5 | 135 |
| 0 | 0 | 1 | 1 | 0 | 1 | 120 | 7.5 | 135 |
| 0 | 0 | 1 | 1 | 0 | 1 | 121 | 7.5 | 135 |
| 0 | 0 | 1 | 1 | 0 | 1 | 122 | 7.5 | 135 |
| 0 | 0 | 1 | 1 | 0 | 1 | 123 | 7.5 | 135 |
| 0 | 0 | 1 | 1 | 0 | 1 | 124 | 7.5 | 135 |
| 0 | 0 | 1 | 1 | 0 | 1 | 125 | 7.5 | 135 |
| 0 | 0 | 1 | 1 | 0 | 1 | 126 | 7.5 | 135 |
| 0 | 0 | 1 | 1 | 0 | 1 | 127 | 7.5 | 135 |
| 0 | 0 | 1 | 1 | 0 | 1 | 128 | 7.5 | 135 |
| 0 | 0 | 1 | 1 | 0 | 1 | 129 | 7.5 | 135 |
| 0 | 0 | 1 | 1 | 0 | 1 | 130 | 7.5 | 135 |
| 0 | 0 | 1 | 1 | 0 | 1 | 131 | 7.5 | 135 |
| 0 | 0 | 1 | 1 | 0 | 1 | 132 | 7.5 | 135 |
| 0 | 0 | 1 | 1 | 0 | 1 | 133 | 7.5 | 135 |
| 0 | 0 | 1 | 1 | 0 | 1 | 134 | 7.5 | 135 |
| 0 | 0 | 1 | 1 | 0 | 1 | 135 | 7.5 | 135 |
| 0 | 0 | 1 | 1 | 0 | 1 | 136 | 7.5 | 135 |
| 0 | 0 | 1 | 1 | 0 | 1 | 137 | 7.5 | 135 |
| 0 | 0 | 1 | 1 | 0 | 1 | 138 | 7.5 | 135 |
| 0 | 0 | 1 | 1 | 0 | 1 | 139 | 7.5 | 135 |
| 0 | 0 | 1 | 1 | 0 | 1 | 140 | 7.5 | 135 |
| 0 | 0 | 1 | 1 | 0 | 1 | 141 | 7.5 | 135 |
| 0 | 0 | 1 | 1 | 0 | 1 | 142 | 7.5 | 135 |
| 0 | 0 | 1 | 1 | 0 | 1 | 143 | 7.5 | 135 |
| 0 | 0 | 1 | 1 | 0 | 1 | 144 | 7.5 | 135 |
| 0 | 0 | 1 | 1 | 0 | 1 | 145 | 7.5 | 135 |
| 0 | 0 | 1 | 1 | 0 | 1 | 146 | 7.5 | 135 |
| 0 | 0 | 1 | 1 | 0 | 1 | 147 | 7.5 | 135 |
| 0 | 0 | 1 | 1 | 0 | 1 | 148 | 7.5 | 135 |
| 0 | 0 | 1 | 1 | 0 | 1 | 149 | 7.5 | 135 |
| 0 | 0 | 1 | 1 | 0 | 1 | 150 | 7.5 | 135 |
| 0 | 0 | 1 | 1 | 0 | 1 | 151 | 7.5 | 135 |
| 0 | 0 | 1 | 1 | 0 | 1 | 152 | 7.5 | 135 |
| 0 | 0 | 1 | 1 | 0 | 1 | 153 | 7.5 | 135 |
| 0 | 0 | 1 | 1 | 0 | 1 | 154 | 7.5 | 135 |
| 0 | 0 | 1 | 1 | 0 | 1 | 155 | 7.5 | 135 |
| 0 | 0 | 1 | 1 | 0 | 1 | 156 | 7.5 | 135 |
| 0 | 0 | 1 | 1 | 0 | 1 | 157 | 7.5 | 135 |
| 0 | 0 | 1 | 1 | 0 | 1 | 158 | 7.5 | 135 |
| 0 | 0 | 1 | 1 | 0 | 1 | 159 | 7.5 | 135 |

|   |   |   |   |   |   |     |     |     |
|---|---|---|---|---|---|-----|-----|-----|
| 0 | 0 | 1 | 1 | 0 | 1 | 160 | 7.5 | 135 |
| 0 | 0 | 1 | 1 | 0 | 1 | 161 | 7.5 | 135 |
| 0 | 0 | 1 | 1 | 0 | 1 | 162 | 7.5 | 135 |
| 0 | 0 | 1 | 1 | 0 | 1 | 163 | 7.5 | 135 |
| 0 | 0 | 1 | 1 | 0 | 1 | 164 | 7.5 | 135 |
| 0 | 0 | 1 | 1 | 0 | 1 | 165 | 7.5 | 135 |
| 0 | 0 | 1 | 1 | 0 | 1 | 166 | 7.5 | 135 |
| 0 | 0 | 1 | 1 | 0 | 1 | 167 | 7.5 | 135 |
| 0 | 0 | 1 | 1 | 0 | 1 | 168 | 7.5 | 135 |
| 0 | 0 | 1 | 1 | 0 | 1 | 169 | 7.5 | 135 |
| 0 | 0 | 1 | 1 | 0 | 1 | 170 | 7.5 | 135 |
| 0 | 0 | 1 | 1 | 0 | 1 | 171 | 7.5 | 135 |
| 0 | 0 | 1 | 1 | 0 | 1 | 172 | 7.5 | 135 |
| 0 | 0 | 1 | 1 | 0 | 1 | 173 | 7.5 | 135 |
| 0 | 0 | 1 | 1 | 0 | 1 | 174 | 7.5 | 135 |
| 0 | 0 | 1 | 1 | 0 | 1 | 175 | 7.5 | 135 |
| 0 | 0 | 1 | 1 | 0 | 1 | 176 | 7.5 | 135 |
| 0 | 0 | 1 | 1 | 0 | 1 | 177 | 7.5 | 135 |
| 0 | 0 | 1 | 1 | 0 | 1 | 178 | 7.5 | 135 |
| 0 | 0 | 1 | 1 | 0 | 1 | 179 | 7.5 | 135 |
| 0 | 0 | 1 | 1 | 0 | 1 | 180 | 7.5 | 135 |
| 0 | 0 | 1 | 0 | 1 | 1 | 0   | 7.5 | 0   |
| 0 | 0 | 1 | 0 | 1 | 1 | 1   | 7.5 | 15  |
| 0 | 0 | 1 | 0 | 1 | 1 | 2   | 7.5 | 15  |
| 0 | 0 | 1 | 0 | 1 | 1 | 3   | 7.5 | 15  |
| 0 | 0 | 1 | 0 | 1 | 1 | 4   | 7.5 | 15  |
| 0 | 0 | 1 | 0 | 1 | 1 | 5   | 7.5 | 15  |
| 0 | 0 | 1 | 0 | 1 | 1 | 6   | 7.5 | 15  |
| 0 | 0 | 1 | 0 | 1 | 1 | 7   | 7.5 | 15  |
| 0 | 0 | 1 | 0 | 1 | 1 | 8   | 7.5 | 15  |
| 0 | 0 | 1 | 0 | 1 | 1 | 9   | 7.5 | 15  |
| 0 | 0 | 1 | 0 | 1 | 1 | 10  | 7.5 | 15  |
| 0 | 0 | 1 | 0 | 1 | 1 | 11  | 7.5 | 15  |
| 0 | 0 | 1 | 0 | 1 | 1 | 12  | 7.5 | 15  |
| 0 | 0 | 1 | 0 | 1 | 1 | 13  | 7.5 | 15  |
| 0 | 0 | 1 | 0 | 1 | 1 | 14  | 7.5 | 15  |
| 0 | 0 | 1 | 0 | 1 | 1 | 15  | 7.5 | 15  |
| 0 | 0 | 1 | 0 | 1 | 1 | 16  | 7.5 | 15  |
| 0 | 0 | 1 | 0 | 1 | 1 | 17  | 7.5 | 15  |
| 0 | 0 | 1 | 0 | 1 | 1 | 18  | 7.5 | 15  |
| 0 | 0 | 1 | 0 | 1 | 1 | 19  | 7.5 | 15  |
| 0 | 0 | 1 | 0 | 1 | 1 | 20  | 7.5 | 15  |
| 0 | 0 | 1 | 0 | 1 | 1 | 21  | 7.5 | 15  |
| 0 | 0 | 1 | 0 | 1 | 1 | 22  | 7.5 | 15  |
| 0 | 0 | 1 | 0 | 1 | 1 | 23  | 7.5 | 15  |
| 0 | 0 | 1 | 0 | 1 | 1 | 24  | 7.5 | 15  |

|   |   |   |   |   |   |    |     |    |
|---|---|---|---|---|---|----|-----|----|
| 0 | 0 | 1 | 0 | 1 | 1 | 25 | 7.5 | 15 |
| 0 | 0 | 1 | 0 | 1 | 1 | 26 | 7.5 | 15 |
| 0 | 0 | 1 | 0 | 1 | 1 | 27 | 7.5 | 15 |
| 0 | 0 | 1 | 0 | 1 | 1 | 28 | 7.5 | 15 |
| 0 | 0 | 1 | 0 | 1 | 1 | 29 | 7.5 | 15 |
| 0 | 0 | 1 | 0 | 1 | 1 | 30 | 7.5 | 30 |
| 0 | 0 | 1 | 0 | 1 | 1 | 31 | 7.5 | 45 |
| 0 | 0 | 1 | 0 | 1 | 1 | 32 | 7.5 | 45 |
| 0 | 0 | 1 | 0 | 1 | 1 | 33 | 7.5 | 45 |
| 0 | 0 | 1 | 0 | 1 | 1 | 34 | 7.5 | 45 |
| 0 | 0 | 1 | 0 | 1 | 1 | 35 | 7.5 | 45 |
| 0 | 0 | 1 | 0 | 1 | 1 | 36 | 7.5 | 45 |
| 0 | 0 | 1 | 0 | 1 | 1 | 37 | 7.5 | 45 |
| 0 | 0 | 1 | 0 | 1 | 1 | 38 | 7.5 | 45 |
| 0 | 0 | 1 | 0 | 1 | 1 | 39 | 7.5 | 45 |
| 0 | 0 | 1 | 0 | 1 | 1 | 40 | 7.5 | 45 |
| 0 | 0 | 1 | 0 | 1 | 1 | 41 | 7.5 | 45 |
| 0 | 0 | 1 | 0 | 1 | 1 | 42 | 7.5 | 45 |
| 0 | 0 | 1 | 0 | 1 | 1 | 43 | 7.5 | 45 |
| 0 | 0 | 1 | 0 | 1 | 1 | 44 | 7.5 | 45 |
| 0 | 0 | 1 | 0 | 1 | 1 | 45 | 7.5 | 45 |
| 0 | 0 | 1 | 0 | 1 | 1 | 46 | 7.5 | 45 |
| 0 | 0 | 1 | 0 | 1 | 1 | 47 | 7.5 | 45 |
| 0 | 0 | 1 | 0 | 1 | 1 | 48 | 7.5 | 45 |
| 0 | 0 | 1 | 0 | 1 | 1 | 49 | 7.5 | 45 |
| 0 | 0 | 1 | 0 | 1 | 1 | 50 | 7.5 | 45 |
| 0 | 0 | 1 | 0 | 1 | 1 | 51 | 7.5 | 45 |
| 0 | 0 | 1 | 0 | 1 | 1 | 52 | 7.5 | 45 |
| 0 | 0 | 1 | 0 | 1 | 1 | 53 | 7.5 | 45 |
| 0 | 0 | 1 | 0 | 1 | 1 | 54 | 7.5 | 45 |
| 0 | 0 | 1 | 0 | 1 | 1 | 55 | 7.5 | 45 |
| 0 | 0 | 1 | 0 | 1 | 1 | 56 | 7.5 | 45 |
| 0 | 0 | 1 | 0 | 1 | 1 | 57 | 7.5 | 45 |
| 0 | 0 | 1 | 0 | 1 | 1 | 58 | 7.5 | 45 |
| 0 | 0 | 1 | 0 | 1 | 1 | 59 | 7.5 | 45 |
| 0 | 0 | 1 | 0 | 1 | 1 | 60 | 7.5 | 45 |
| 0 | 0 | 1 | 0 | 1 | 1 | 61 | 7.5 | 45 |
| 0 | 0 | 1 | 0 | 1 | 1 | 62 | 7.5 | 45 |
| 0 | 0 | 1 | 0 | 1 | 1 | 63 | 7.5 | 45 |
| 0 | 0 | 1 | 0 | 1 | 1 | 64 | 7.5 | 45 |
| 0 | 0 | 1 | 0 | 1 | 1 | 65 | 7.5 | 45 |
| 0 | 0 | 1 | 0 | 1 | 1 | 66 | 7.5 | 45 |
| 0 | 0 | 1 | 0 | 1 | 1 | 67 | 7.5 | 45 |
| 0 | 0 | 1 | 0 | 1 | 1 | 68 | 7.5 | 45 |
| 0 | 0 | 1 | 0 | 1 | 1 | 69 | 7.5 | 45 |
| 0 | 0 | 1 | 0 | 1 | 1 | 70 | 7.5 | 45 |

|   |   |   |   |   |   |     |     |     |
|---|---|---|---|---|---|-----|-----|-----|
| 0 | 0 | 1 | 0 | 1 | 1 | 71  | 7.5 | 45  |
| 0 | 0 | 1 | 0 | 1 | 1 | 72  | 7.5 | 45  |
| 0 | 0 | 1 | 0 | 1 | 1 | 73  | 7.5 | 45  |
| 0 | 0 | 1 | 0 | 1 | 1 | 74  | 7.5 | 45  |
| 0 | 0 | 1 | 0 | 1 | 1 | 75  | 7.5 | 45  |
| 0 | 0 | 1 | 0 | 1 | 1 | 76  | 7.5 | 105 |
| 0 | 0 | 1 | 0 | 1 | 1 | 77  | 7.5 | 105 |
| 0 | 0 | 1 | 0 | 1 | 1 | 78  | 7.5 | 105 |
| 0 | 0 | 1 | 0 | 1 | 1 | 79  | 7.5 | 105 |
| 0 | 0 | 1 | 0 | 1 | 1 | 80  | 7.5 | 105 |
| 0 | 0 | 1 | 0 | 1 | 1 | 81  | 7.5 | 105 |
| 0 | 0 | 1 | 0 | 1 | 1 | 82  | 7.5 | 105 |
| 0 | 0 | 1 | 0 | 1 | 1 | 83  | 7.5 | 105 |
| 0 | 0 | 1 | 0 | 1 | 1 | 84  | 7.5 | 105 |
| 0 | 0 | 1 | 0 | 1 | 1 | 85  | 7.5 | 105 |
| 0 | 0 | 1 | 0 | 1 | 1 | 86  | 7.5 | 105 |
| 0 | 0 | 1 | 0 | 1 | 1 | 87  | 7.5 | 105 |
| 0 | 0 | 1 | 0 | 1 | 1 | 88  | 7.5 | 105 |
| 0 | 0 | 1 | 0 | 1 | 1 | 89  | 7.5 | 105 |
| 0 | 0 | 1 | 0 | 1 | 1 | 90  | 7.5 | 105 |
| 0 | 0 | 1 | 0 | 1 | 1 | 91  | 7.5 | 105 |
| 0 | 0 | 1 | 0 | 1 | 1 | 92  | 7.5 | 105 |
| 0 | 0 | 1 | 0 | 1 | 1 | 93  | 7.5 | 105 |
| 0 | 0 | 1 | 0 | 1 | 1 | 94  | 7.5 | 105 |
| 0 | 0 | 1 | 0 | 1 | 1 | 95  | 7.5 | 105 |
| 0 | 0 | 1 | 0 | 1 | 1 | 96  | 7.5 | 105 |
| 0 | 0 | 1 | 0 | 1 | 1 | 97  | 7.5 | 105 |
| 0 | 0 | 1 | 0 | 1 | 1 | 98  | 7.5 | 105 |
| 0 | 0 | 1 | 0 | 1 | 1 | 99  | 7.5 | 105 |
| 0 | 0 | 1 | 0 | 1 | 1 | 100 | 7.5 | 105 |
| 0 | 0 | 1 | 0 | 1 | 1 | 101 | 7.5 | 105 |
| 0 | 0 | 1 | 0 | 1 | 1 | 102 | 7.5 | 105 |
| 0 | 0 | 1 | 0 | 1 | 1 | 103 | 7.5 | 105 |
| 0 | 0 | 1 | 0 | 1 | 1 | 104 | 7.5 | 105 |
| 0 | 0 | 1 | 0 | 1 | 1 | 105 | 7.5 | 105 |
| 0 | 0 | 1 | 0 | 1 | 1 | 106 | 7.5 | 105 |
| 0 | 0 | 1 | 0 | 1 | 1 | 107 | 7.5 | 105 |
| 0 | 0 | 1 | 0 | 1 | 1 | 108 | 7.5 | 105 |
| 0 | 0 | 1 | 0 | 1 | 1 | 109 | 7.5 | 105 |
| 0 | 0 | 1 | 0 | 1 | 1 | 110 | 7.5 | 105 |
| 0 | 0 | 1 | 0 | 1 | 1 | 111 | 7.5 | 105 |
| 0 | 0 | 1 | 0 | 1 | 1 | 112 | 7.5 | 105 |
| 0 | 0 | 1 | 0 | 1 | 1 | 113 | 7.5 | 105 |
| 0 | 0 | 1 | 0 | 1 | 1 | 114 | 7.5 | 105 |
| 0 | 0 | 1 | 0 | 1 | 1 | 115 | 7.5 | 105 |
| 0 | 0 | 1 | 0 | 1 | 1 | 116 | 7.5 | 105 |
| 0 | 0 | 1 | 0 | 1 | 1 | 117 | 7.5 | 105 |

|   |   |   |   |   |   |     |     |     |
|---|---|---|---|---|---|-----|-----|-----|
| 0 | 0 | 1 | 0 | 1 | 1 | 118 | 7.5 | 105 |
| 0 | 0 | 1 | 0 | 1 | 1 | 119 | 7.5 | 105 |
| 0 | 0 | 1 | 0 | 1 | 1 | 120 | 7.5 | 105 |
| 0 | 0 | 1 | 0 | 1 | 1 | 121 | 7.5 | 105 |
| 0 | 0 | 1 | 0 | 1 | 1 | 122 | 7.5 | 105 |
| 0 | 0 | 1 | 0 | 1 | 1 | 123 | 7.5 | 105 |
| 0 | 0 | 1 | 0 | 1 | 1 | 124 | 7.5 | 105 |
| 0 | 0 | 1 | 0 | 1 | 1 | 125 | 7.5 | 105 |
| 0 | 0 | 1 | 0 | 1 | 1 | 126 | 7.5 | 105 |
| 0 | 0 | 1 | 0 | 1 | 1 | 127 | 7.5 | 105 |
| 0 | 0 | 1 | 0 | 1 | 1 | 128 | 7.5 | 105 |
| 0 | 0 | 1 | 0 | 1 | 1 | 129 | 7.5 | 105 |
| 0 | 0 | 1 | 0 | 1 | 1 | 130 | 7.5 | 105 |
| 0 | 0 | 1 | 0 | 1 | 1 | 131 | 7.5 | 105 |
| 0 | 0 | 1 | 0 | 1 | 1 | 132 | 7.5 | 105 |
| 0 | 0 | 1 | 0 | 1 | 1 | 133 | 7.5 | 105 |
| 0 | 0 | 1 | 0 | 1 | 1 | 134 | 7.5 | 105 |
| 0 | 0 | 1 | 0 | 1 | 1 | 135 | 7.5 | 105 |
| 0 | 0 | 1 | 0 | 1 | 1 | 136 | 7.5 | 105 |
| 0 | 0 | 1 | 0 | 1 | 1 | 137 | 7.5 | 105 |
| 0 | 0 | 1 | 0 | 1 | 1 | 138 | 7.5 | 105 |
| 0 | 0 | 1 | 0 | 1 | 1 | 139 | 7.5 | 105 |
| 0 | 0 | 1 | 0 | 1 | 1 | 140 | 7.5 | 105 |
| 0 | 0 | 1 | 0 | 1 | 1 | 141 | 7.5 | 105 |
| 0 | 0 | 1 | 0 | 1 | 1 | 142 | 7.5 | 105 |
| 0 | 0 | 1 | 0 | 1 | 1 | 143 | 7.5 | 105 |
| 0 | 0 | 1 | 0 | 1 | 1 | 144 | 7.5 | 105 |
| 0 | 0 | 1 | 0 | 1 | 1 | 145 | 7.5 | 105 |
| 0 | 0 | 1 | 0 | 1 | 1 | 146 | 7.5 | 105 |
| 0 | 0 | 1 | 0 | 1 | 1 | 147 | 7.5 | 105 |
| 0 | 0 | 1 | 0 | 1 | 1 | 148 | 7.5 | 105 |
| 0 | 0 | 1 | 0 | 1 | 1 | 149 | 7.5 | 105 |
| 0 | 0 | 1 | 0 | 1 | 1 | 150 | 7.5 | 105 |
| 0 | 0 | 1 | 0 | 1 | 1 | 151 | 7.5 | 105 |
| 0 | 0 | 1 | 0 | 1 | 1 | 152 | 7.5 | 105 |
| 0 | 0 | 1 | 0 | 1 | 1 | 153 | 7.5 | 105 |
| 0 | 0 | 1 | 0 | 1 | 1 | 154 | 7.5 | 105 |
| 0 | 0 | 1 | 0 | 1 | 1 | 155 | 7.5 | 105 |
| 0 | 0 | 1 | 0 | 1 | 1 | 156 | 7.5 | 105 |
| 0 | 0 | 1 | 0 | 1 | 1 | 157 | 7.5 | 105 |
| 0 | 0 | 1 | 0 | 1 | 1 | 158 | 7.5 | 105 |
| 0 | 0 | 1 | 0 | 1 | 1 | 159 | 7.5 | 105 |
| 0 | 0 | 1 | 0 | 1 | 1 | 160 | 7.5 | 105 |
| 0 | 0 | 1 | 0 | 1 | 1 | 161 | 7.5 | 105 |
| 0 | 0 | 1 | 0 | 1 | 1 | 162 | 7.5 | 105 |
| 0 | 0 | 1 | 0 | 1 | 1 | 163 | 7.5 | 105 |

|   |   |   |   |   |   |     |     |     |
|---|---|---|---|---|---|-----|-----|-----|
| 0 | 0 | 1 | 0 | 1 | 1 | 164 | 7.5 | 105 |
| 0 | 0 | 1 | 0 | 1 | 1 | 165 | 7.5 | 105 |
| 0 | 0 | 1 | 0 | 1 | 1 | 166 | 7.5 | 105 |
| 0 | 0 | 1 | 0 | 1 | 1 | 167 | 7.5 | 105 |
| 0 | 0 | 1 | 0 | 1 | 1 | 168 | 7.5 | 105 |
| 0 | 0 | 1 | 0 | 1 | 1 | 169 | 7.5 | 105 |
| 0 | 0 | 1 | 0 | 1 | 1 | 170 | 7.5 | 105 |
| 0 | 0 | 1 | 0 | 1 | 1 | 171 | 7.5 | 105 |
| 0 | 0 | 1 | 0 | 1 | 1 | 172 | 7.5 | 105 |
| 0 | 0 | 1 | 0 | 1 | 1 | 173 | 7.5 | 105 |
| 0 | 0 | 1 | 0 | 1 | 1 | 174 | 7.5 | 105 |
| 0 | 0 | 1 | 0 | 1 | 1 | 175 | 7.5 | 105 |
| 0 | 0 | 1 | 0 | 1 | 1 | 176 | 7.5 | 105 |
| 0 | 0 | 1 | 0 | 1 | 1 | 177 | 7.5 | 105 |
| 0 | 0 | 1 | 0 | 1 | 1 | 178 | 7.5 | 105 |
| 0 | 0 | 1 | 0 | 1 | 1 | 179 | 7.5 | 105 |
| 0 | 0 | 1 | 0 | 1 | 1 | 180 | 7.5 | 105 |
| 0 | 0 | 0 | 1 | 1 | 1 | 0   | 7.5 | 0   |
| 0 | 0 | 0 | 1 | 1 | 1 | 1   | 7.5 | 15  |
| 0 | 0 | 0 | 1 | 1 | 1 | 2   | 7.5 | 15  |
| 0 | 0 | 0 | 1 | 1 | 1 | 3   | 7.5 | 15  |
| 0 | 0 | 0 | 1 | 1 | 1 | 4   | 7.5 | 15  |
| 0 | 0 | 0 | 1 | 1 | 1 | 5   | 7.5 | 15  |
| 0 | 0 | 0 | 1 | 1 | 1 | 6   | 7.5 | 15  |
| 0 | 0 | 0 | 1 | 1 | 1 | 7   | 7.5 | 15  |
| 0 | 0 | 0 | 1 | 1 | 1 | 8   | 7.5 | 15  |
| 0 | 0 | 0 | 1 | 1 | 1 | 9   | 7.5 | 15  |
| 0 | 0 | 0 | 1 | 1 | 1 | 10  | 7.5 | 15  |
| 0 | 0 | 0 | 1 | 1 | 1 | 11  | 7.5 | 15  |
| 0 | 0 | 0 | 1 | 1 | 1 | 12  | 7.5 | 15  |
| 0 | 0 | 0 | 1 | 1 | 1 | 13  | 7.5 | 15  |
| 0 | 0 | 0 | 1 | 1 | 1 | 14  | 7.5 | 15  |
| 0 | 0 | 0 | 1 | 1 | 1 | 15  | 7.5 | 15  |
| 0 | 0 | 0 | 1 | 1 | 1 | 16  | 7.5 | 15  |
| 0 | 0 | 0 | 1 | 1 | 1 | 17  | 7.5 | 15  |
| 0 | 0 | 0 | 1 | 1 | 1 | 18  | 7.5 | 15  |
| 0 | 0 | 0 | 1 | 1 | 1 | 19  | 7.5 | 15  |
| 0 | 0 | 0 | 1 | 1 | 1 | 20  | 7.5 | 15  |
| 0 | 0 | 0 | 1 | 1 | 1 | 21  | 7.5 | 15  |
| 0 | 0 | 0 | 1 | 1 | 1 | 22  | 7.5 | 15  |
| 0 | 0 | 0 | 1 | 1 | 1 | 23  | 7.5 | 15  |
| 0 | 0 | 0 | 1 | 1 | 1 | 24  | 7.5 | 15  |
| 0 | 0 | 0 | 1 | 1 | 1 | 25  | 7.5 | 15  |
| 0 | 0 | 0 | 1 | 1 | 1 | 26  | 7.5 | 15  |
| 0 | 0 | 0 | 1 | 1 | 1 | 27  | 7.5 | 15  |
| 0 | 0 | 0 | 1 | 1 | 1 | 28  | 7.5 | 15  |

|   |   |   |   |   |   |    |     |    |
|---|---|---|---|---|---|----|-----|----|
| 0 | 0 | 0 | 1 | 1 | 1 | 29 | 7.5 | 15 |
| 0 | 0 | 0 | 1 | 1 | 1 | 30 | 7.5 | 30 |
| 0 | 0 | 0 | 1 | 1 | 1 | 31 | 7.5 | 45 |
| 0 | 0 | 0 | 1 | 1 | 1 | 32 | 7.5 | 45 |
| 0 | 0 | 0 | 1 | 1 | 1 | 33 | 7.5 | 45 |
| 0 | 0 | 0 | 1 | 1 | 1 | 34 | 7.5 | 45 |
| 0 | 0 | 0 | 1 | 1 | 1 | 35 | 7.5 | 45 |
| 0 | 0 | 0 | 1 | 1 | 1 | 36 | 7.5 | 45 |
| 0 | 0 | 0 | 1 | 1 | 1 | 37 | 7.5 | 45 |
| 0 | 0 | 0 | 1 | 1 | 1 | 38 | 7.5 | 45 |
| 0 | 0 | 0 | 1 | 1 | 1 | 39 | 7.5 | 45 |
| 0 | 0 | 0 | 1 | 1 | 1 | 40 | 7.5 | 45 |
| 0 | 0 | 0 | 1 | 1 | 1 | 41 | 7.5 | 45 |
| 0 | 0 | 0 | 1 | 1 | 1 | 42 | 7.5 | 45 |
| 0 | 0 | 0 | 1 | 1 | 1 | 43 | 7.5 | 45 |
| 0 | 0 | 0 | 1 | 1 | 1 | 44 | 7.5 | 45 |
| 0 | 0 | 0 | 1 | 1 | 1 | 45 | 7.5 | 45 |
| 0 | 0 | 0 | 1 | 1 | 1 | 46 | 7.5 | 45 |
| 0 | 0 | 0 | 1 | 1 | 1 | 47 | 7.5 | 45 |
| 0 | 0 | 0 | 1 | 1 | 1 | 48 | 7.5 | 45 |
| 0 | 0 | 0 | 1 | 1 | 1 | 49 | 7.5 | 45 |
| 0 | 0 | 0 | 1 | 1 | 1 | 50 | 7.5 | 45 |
| 0 | 0 | 0 | 1 | 1 | 1 | 51 | 7.5 | 45 |
| 0 | 0 | 0 | 1 | 1 | 1 | 52 | 7.5 | 45 |
| 0 | 0 | 0 | 1 | 1 | 1 | 53 | 7.5 | 45 |
| 0 | 0 | 0 | 1 | 1 | 1 | 54 | 7.5 | 45 |
| 0 | 0 | 0 | 1 | 1 | 1 | 55 | 7.5 | 45 |
| 0 | 0 | 0 | 1 | 1 | 1 | 56 | 7.5 | 45 |
| 0 | 0 | 0 | 1 | 1 | 1 | 57 | 7.5 | 45 |
| 0 | 0 | 0 | 1 | 1 | 1 | 58 | 7.5 | 45 |
| 0 | 0 | 0 | 1 | 1 | 1 | 59 | 7.5 | 45 |
| 0 | 0 | 0 | 1 | 1 | 1 | 60 | 7.5 | 60 |
| 0 | 0 | 0 | 1 | 1 | 1 | 61 | 7.5 | 75 |
| 0 | 0 | 0 | 1 | 1 | 1 | 62 | 7.5 | 75 |
| 0 | 0 | 0 | 1 | 1 | 1 | 63 | 7.5 | 75 |
| 0 | 0 | 0 | 1 | 1 | 1 | 64 | 7.5 | 75 |
| 0 | 0 | 0 | 1 | 1 | 1 | 65 | 7.5 | 75 |
| 0 | 0 | 0 | 1 | 1 | 1 | 66 | 7.5 | 75 |
| 0 | 0 | 0 | 1 | 1 | 1 | 67 | 7.5 | 75 |
| 0 | 0 | 0 | 1 | 1 | 1 | 68 | 7.5 | 75 |
| 0 | 0 | 0 | 1 | 1 | 1 | 69 | 7.5 | 75 |
| 0 | 0 | 0 | 1 | 1 | 1 | 70 | 7.5 | 75 |
| 0 | 0 | 0 | 1 | 1 | 1 | 71 | 7.5 | 75 |
| 0 | 0 | 0 | 1 | 1 | 1 | 72 | 7.5 | 75 |
| 0 | 0 | 0 | 1 | 1 | 1 | 73 | 7.5 | 75 |
| 0 | 0 | 0 | 1 | 1 | 1 | 74 | 7.5 | 75 |

|   |   |   |   |   |   |     |     |    |
|---|---|---|---|---|---|-----|-----|----|
| 0 | 0 | 0 | 1 | 1 | 1 | 75  | 7.5 | 75 |
| 0 | 0 | 0 | 1 | 1 | 1 | 76  | 7.5 | 75 |
| 0 | 0 | 0 | 1 | 1 | 1 | 77  | 7.5 | 75 |
| 0 | 0 | 0 | 1 | 1 | 1 | 78  | 7.5 | 75 |
| 0 | 0 | 0 | 1 | 1 | 1 | 79  | 7.5 | 75 |
| 0 | 0 | 0 | 1 | 1 | 1 | 80  | 7.5 | 75 |
| 0 | 0 | 0 | 1 | 1 | 1 | 81  | 7.5 | 75 |
| 0 | 0 | 0 | 1 | 1 | 1 | 82  | 7.5 | 75 |
| 0 | 0 | 0 | 1 | 1 | 1 | 83  | 7.5 | 75 |
| 0 | 0 | 0 | 1 | 1 | 1 | 84  | 7.5 | 75 |
| 0 | 0 | 0 | 1 | 1 | 1 | 85  | 7.5 | 75 |
| 0 | 0 | 0 | 1 | 1 | 1 | 86  | 7.5 | 75 |
| 0 | 0 | 0 | 1 | 1 | 1 | 87  | 7.5 | 75 |
| 0 | 0 | 0 | 1 | 1 | 1 | 88  | 7.5 | 75 |
| 0 | 0 | 0 | 1 | 1 | 1 | 89  | 7.5 | 75 |
| 0 | 0 | 0 | 1 | 1 | 1 | 90  | 7.5 | 75 |
| 0 | 0 | 0 | 1 | 1 | 1 | 91  | 7.5 | 75 |
| 0 | 0 | 0 | 1 | 1 | 1 | 92  | 7.5 | 75 |
| 0 | 0 | 0 | 1 | 1 | 1 | 93  | 7.5 | 75 |
| 0 | 0 | 0 | 1 | 1 | 1 | 94  | 7.5 | 75 |
| 0 | 0 | 0 | 1 | 1 | 1 | 95  | 7.5 | 75 |
| 0 | 0 | 0 | 1 | 1 | 1 | 96  | 7.5 | 75 |
| 0 | 0 | 0 | 1 | 1 | 1 | 97  | 7.5 | 75 |
| 0 | 0 | 0 | 1 | 1 | 1 | 98  | 7.5 | 75 |
| 0 | 0 | 0 | 1 | 1 | 1 | 99  | 7.5 | 75 |
| 0 | 0 | 0 | 1 | 1 | 1 | 100 | 7.5 | 75 |
| 0 | 0 | 0 | 1 | 1 | 1 | 101 | 7.5 | 75 |
| 0 | 0 | 0 | 1 | 1 | 1 | 102 | 7.5 | 75 |
| 0 | 0 | 0 | 1 | 1 | 1 | 103 | 7.5 | 75 |
| 0 | 0 | 0 | 1 | 1 | 1 | 104 | 7.5 | 75 |
| 0 | 0 | 0 | 1 | 1 | 1 | 105 | 7.5 | 75 |
| 0 | 0 | 0 | 1 | 1 | 1 | 106 | 7.5 | 75 |
| 0 | 0 | 0 | 1 | 1 | 1 | 107 | 7.5 | 75 |
| 0 | 0 | 0 | 1 | 1 | 1 | 108 | 7.5 | 75 |
| 0 | 0 | 0 | 1 | 1 | 1 | 109 | 7.5 | 75 |
| 0 | 0 | 0 | 1 | 1 | 1 | 110 | 7.5 | 75 |
| 0 | 0 | 0 | 1 | 1 | 1 | 111 | 7.5 | 75 |
| 0 | 0 | 0 | 1 | 1 | 1 | 112 | 7.5 | 75 |
| 0 | 0 | 0 | 1 | 1 | 1 | 113 | 7.5 | 75 |
| 0 | 0 | 0 | 1 | 1 | 1 | 114 | 7.5 | 75 |
| 0 | 0 | 0 | 1 | 1 | 1 | 115 | 7.5 | 75 |
| 0 | 0 | 0 | 1 | 1 | 1 | 116 | 7.5 | 75 |
| 0 | 0 | 0 | 1 | 1 | 1 | 117 | 7.5 | 75 |
| 0 | 0 | 0 | 1 | 1 | 1 | 118 | 7.5 | 75 |
| 0 | 0 | 0 | 1 | 1 | 1 | 119 | 7.5 | 75 |
| 0 | 0 | 0 | 1 | 1 | 1 | 120 | 7.5 | 75 |

|   |   |   |   |   |   |     |     |    |
|---|---|---|---|---|---|-----|-----|----|
| 0 | 0 | 0 | 1 | 1 | 1 | 121 | 7.5 | 75 |
| 0 | 0 | 0 | 1 | 1 | 1 | 122 | 7.5 | 75 |
| 0 | 0 | 0 | 1 | 1 | 1 | 123 | 7.5 | 75 |
| 0 | 0 | 0 | 1 | 1 | 1 | 124 | 7.5 | 75 |
| 0 | 0 | 0 | 1 | 1 | 1 | 125 | 7.5 | 75 |
| 0 | 0 | 0 | 1 | 1 | 1 | 126 | 7.5 | 75 |
| 0 | 0 | 0 | 1 | 1 | 1 | 127 | 7.5 | 75 |
| 0 | 0 | 0 | 1 | 1 | 1 | 128 | 7.5 | 75 |
| 0 | 0 | 0 | 1 | 1 | 1 | 129 | 7.5 | 75 |
| 0 | 0 | 0 | 1 | 1 | 1 | 130 | 7.5 | 75 |
| 0 | 0 | 0 | 1 | 1 | 1 | 131 | 7.5 | 75 |
| 0 | 0 | 0 | 1 | 1 | 1 | 132 | 7.5 | 75 |
| 0 | 0 | 0 | 1 | 1 | 1 | 133 | 7.5 | 75 |
| 0 | 0 | 0 | 1 | 1 | 1 | 134 | 7.5 | 75 |
| 0 | 0 | 0 | 1 | 1 | 1 | 135 | 7.5 | 75 |
| 0 | 0 | 0 | 1 | 1 | 1 | 136 | 7.5 | 75 |
| 0 | 0 | 0 | 1 | 1 | 1 | 137 | 7.5 | 75 |
| 0 | 0 | 0 | 1 | 1 | 1 | 138 | 7.5 | 75 |
| 0 | 0 | 0 | 1 | 1 | 1 | 139 | 7.5 | 75 |
| 0 | 0 | 0 | 1 | 1 | 1 | 140 | 7.5 | 75 |
| 0 | 0 | 0 | 1 | 1 | 1 | 141 | 7.5 | 75 |
| 0 | 0 | 0 | 1 | 1 | 1 | 142 | 7.5 | 75 |
| 0 | 0 | 0 | 1 | 1 | 1 | 143 | 7.5 | 75 |
| 0 | 0 | 0 | 1 | 1 | 1 | 144 | 7.5 | 75 |
| 0 | 0 | 0 | 1 | 1 | 1 | 145 | 7.5 | 75 |
| 0 | 0 | 0 | 1 | 1 | 1 | 146 | 7.5 | 75 |
| 0 | 0 | 0 | 1 | 1 | 1 | 147 | 7.5 | 75 |
| 0 | 0 | 0 | 1 | 1 | 1 | 148 | 7.5 | 75 |
| 0 | 0 | 0 | 1 | 1 | 1 | 149 | 7.5 | 75 |
| 0 | 0 | 0 | 1 | 1 | 1 | 150 | 7.5 | 75 |
| 0 | 0 | 0 | 1 | 1 | 1 | 151 | 7.5 | 75 |
| 0 | 0 | 0 | 1 | 1 | 1 | 152 | 7.5 | 75 |
| 0 | 0 | 0 | 1 | 1 | 1 | 153 | 7.5 | 75 |
| 0 | 0 | 0 | 1 | 1 | 1 | 154 | 7.5 | 75 |
| 0 | 0 | 0 | 1 | 1 | 1 | 155 | 7.5 | 75 |
| 0 | 0 | 0 | 1 | 1 | 1 | 156 | 7.5 | 75 |
| 0 | 0 | 0 | 1 | 1 | 1 | 157 | 7.5 | 75 |
| 0 | 0 | 0 | 1 | 1 | 1 | 158 | 7.5 | 75 |
| 0 | 0 | 0 | 1 | 1 | 1 | 159 | 7.5 | 75 |
| 0 | 0 | 0 | 1 | 1 | 1 | 160 | 7.5 | 75 |
| 0 | 0 | 0 | 1 | 1 | 1 | 161 | 7.5 | 75 |
| 0 | 0 | 0 | 1 | 1 | 1 | 162 | 7.5 | 75 |
| 0 | 0 | 0 | 1 | 1 | 1 | 163 | 7.5 | 75 |
| 0 | 0 | 0 | 1 | 1 | 1 | 164 | 7.5 | 75 |
| 0 | 0 | 0 | 1 | 1 | 1 | 165 | 7.5 | 75 |
| 0 | 0 | 0 | 1 | 1 | 1 | 166 | 7.5 | 75 |

|   |   |   |   |   |   |     |     |    |
|---|---|---|---|---|---|-----|-----|----|
| 0 | 0 | 0 | 1 | 1 | 1 | 167 | 7.5 | 75 |
| 0 | 0 | 0 | 1 | 1 | 1 | 168 | 7.5 | 75 |
| 0 | 0 | 0 | 1 | 1 | 1 | 169 | 7.5 | 75 |
| 0 | 0 | 0 | 1 | 1 | 1 | 170 | 7.5 | 75 |
| 0 | 0 | 0 | 1 | 1 | 1 | 171 | 7.5 | 75 |
| 0 | 0 | 0 | 1 | 1 | 1 | 172 | 7.5 | 75 |
| 0 | 0 | 0 | 1 | 1 | 1 | 173 | 7.5 | 75 |
| 0 | 0 | 0 | 1 | 1 | 1 | 174 | 7.5 | 75 |
| 0 | 0 | 0 | 1 | 1 | 1 | 175 | 7.5 | 75 |
| 0 | 0 | 0 | 1 | 1 | 1 | 176 | 7.5 | 75 |
| 0 | 0 | 0 | 1 | 1 | 1 | 177 | 7.5 | 75 |
| 0 | 0 | 0 | 1 | 1 | 1 | 178 | 7.5 | 75 |
| 0 | 0 | 0 | 1 | 1 | 1 | 179 | 7.5 | 75 |
| 0 | 0 | 0 | 1 | 1 | 1 | 180 | 7.5 | 75 |
| 0 | 1 | 1 | 1 | 1 | 0 | 0   | 7.5 | 0  |
| 0 | 1 | 1 | 1 | 1 | 0 | 1   | 7.5 | 15 |
| 0 | 1 | 1 | 1 | 1 | 0 | 2   | 7.5 | 15 |
| 0 | 1 | 1 | 1 | 1 | 0 | 3   | 7.5 | 15 |
| 0 | 1 | 1 | 1 | 1 | 0 | 4   | 7.5 | 15 |
| 0 | 1 | 1 | 1 | 1 | 0 | 5   | 7.5 | 15 |
| 0 | 1 | 1 | 1 | 1 | 0 | 6   | 7.5 | 15 |
| 0 | 1 | 1 | 1 | 1 | 0 | 7   | 7.5 | 15 |
| 0 | 1 | 1 | 1 | 1 | 0 | 8   | 7.5 | 15 |
| 0 | 1 | 1 | 1 | 1 | 0 | 9   | 7.5 | 15 |
| 0 | 1 | 1 | 1 | 1 | 0 | 10  | 7.5 | 15 |
| 0 | 1 | 1 | 1 | 1 | 0 | 11  | 7.5 | 15 |
| 0 | 1 | 1 | 1 | 1 | 0 | 12  | 7.5 | 15 |
| 0 | 1 | 1 | 1 | 1 | 0 | 13  | 7.5 | 15 |
| 0 | 1 | 1 | 1 | 1 | 0 | 14  | 7.5 | 15 |
| 0 | 1 | 1 | 1 | 1 | 0 | 15  | 7.5 | 15 |
| 0 | 1 | 1 | 1 | 1 | 0 | 16  | 7.5 | 15 |
| 0 | 1 | 1 | 1 | 1 | 0 | 17  | 7.5 | 15 |
| 0 | 1 | 1 | 1 | 1 | 0 | 18  | 7.5 | 15 |
| 0 | 1 | 1 | 1 | 1 | 0 | 19  | 7.5 | 15 |
| 0 | 1 | 1 | 1 | 1 | 0 | 20  | 7.5 | 15 |
| 0 | 1 | 1 | 1 | 1 | 0 | 21  | 7.5 | 15 |
| 0 | 1 | 1 | 1 | 1 | 0 | 22  | 7.5 | 15 |
| 0 | 1 | 1 | 1 | 1 | 0 | 23  | 7.5 | 15 |
| 0 | 1 | 1 | 1 | 1 | 0 | 24  | 7.5 | 15 |
| 0 | 1 | 1 | 1 | 1 | 0 | 25  | 7.5 | 15 |
| 0 | 1 | 1 | 1 | 1 | 0 | 26  | 7.5 | 15 |
| 0 | 1 | 1 | 1 | 1 | 0 | 27  | 7.5 | 15 |
| 0 | 1 | 1 | 1 | 1 | 0 | 28  | 7.5 | 15 |
| 0 | 1 | 1 | 1 | 1 | 0 | 29  | 7.5 | 15 |
| 0 | 1 | 1 | 1 | 1 | 0 | 30  | 7.5 | 15 |
| 0 | 1 | 1 | 1 | 1 | 0 | 31  | 7.5 | 15 |

|   |   |   |   |   |   |    |     |    |
|---|---|---|---|---|---|----|-----|----|
| 0 | 1 | 1 | 1 | 1 | 0 | 32 | 7.5 | 15 |
| 0 | 1 | 1 | 1 | 1 | 0 | 33 | 7.5 | 15 |
| 0 | 1 | 1 | 1 | 1 | 0 | 34 | 7.5 | 15 |
| 0 | 1 | 1 | 1 | 1 | 0 | 35 | 7.5 | 15 |
| 0 | 1 | 1 | 1 | 1 | 0 | 36 | 7.5 | 15 |
| 0 | 1 | 1 | 1 | 1 | 0 | 37 | 7.5 | 15 |
| 0 | 1 | 1 | 1 | 1 | 0 | 38 | 7.5 | 15 |
| 0 | 1 | 1 | 1 | 1 | 0 | 39 | 7.5 | 15 |
| 0 | 1 | 1 | 1 | 1 | 0 | 40 | 7.5 | 15 |
| 0 | 1 | 1 | 1 | 1 | 0 | 41 | 7.5 | 15 |
| 0 | 1 | 1 | 1 | 1 | 0 | 42 | 7.5 | 15 |
| 0 | 1 | 1 | 1 | 1 | 0 | 43 | 7.5 | 15 |
| 0 | 1 | 1 | 1 | 1 | 0 | 44 | 7.5 | 15 |
| 0 | 1 | 1 | 1 | 1 | 0 | 45 | 7.5 | 15 |
| 0 | 1 | 1 | 1 | 1 | 0 | 46 | 7.5 | 15 |
| 0 | 1 | 1 | 1 | 1 | 0 | 47 | 7.5 | 15 |
| 0 | 1 | 1 | 1 | 1 | 0 | 48 | 7.5 | 15 |
| 0 | 1 | 1 | 1 | 1 | 0 | 49 | 7.5 | 15 |
| 0 | 1 | 1 | 1 | 1 | 0 | 50 | 7.5 | 15 |
| 0 | 1 | 1 | 1 | 1 | 0 | 51 | 7.5 | 15 |
| 0 | 1 | 1 | 1 | 1 | 0 | 52 | 7.5 | 15 |
| 0 | 1 | 1 | 1 | 1 | 0 | 53 | 7.5 | 15 |
| 0 | 1 | 1 | 1 | 1 | 0 | 54 | 7.5 | 15 |
| 0 | 1 | 1 | 1 | 1 | 0 | 55 | 7.5 | 15 |
| 0 | 1 | 1 | 1 | 1 | 0 | 56 | 7.5 | 15 |
| 0 | 1 | 1 | 1 | 1 | 0 | 57 | 7.5 | 15 |
| 0 | 1 | 1 | 1 | 1 | 0 | 58 | 7.5 | 15 |
| 0 | 1 | 1 | 1 | 1 | 0 | 59 | 7.5 | 15 |
| 0 | 1 | 1 | 1 | 1 | 0 | 60 | 7.5 | 15 |
| 0 | 1 | 1 | 1 | 1 | 0 | 61 | 7.5 | 15 |
| 0 | 1 | 1 | 1 | 1 | 0 | 62 | 7.5 | 15 |
| 0 | 1 | 1 | 1 | 1 | 0 | 63 | 7.5 | 15 |
| 0 | 1 | 1 | 1 | 1 | 0 | 64 | 7.5 | 15 |
| 0 | 1 | 1 | 1 | 1 | 0 | 65 | 7.5 | 15 |
| 0 | 1 | 1 | 1 | 1 | 0 | 66 | 7.5 | 15 |
| 0 | 1 | 1 | 1 | 1 | 0 | 67 | 7.5 | 15 |
| 0 | 1 | 1 | 1 | 1 | 0 | 68 | 7.5 | 15 |
| 0 | 1 | 1 | 1 | 1 | 0 | 69 | 7.5 | 15 |
| 0 | 1 | 1 | 1 | 1 | 0 | 70 | 7.5 | 15 |
| 0 | 1 | 1 | 1 | 1 | 0 | 71 | 7.5 | 15 |
| 0 | 1 | 1 | 1 | 1 | 0 | 72 | 7.5 | 15 |
| 0 | 1 | 1 | 1 | 1 | 0 | 73 | 7.5 | 15 |
| 0 | 1 | 1 | 1 | 1 | 0 | 74 | 7.5 | 15 |
| 0 | 1 | 1 | 1 | 1 | 0 | 75 | 7.5 | 15 |
| 0 | 1 | 1 | 1 | 1 | 0 | 76 | 7.5 | 15 |
| 0 | 1 | 1 | 1 | 1 | 0 | 77 | 7.5 | 15 |

|   |   |   |   |   |   |     |     |     |
|---|---|---|---|---|---|-----|-----|-----|
| 0 | 1 | 1 | 1 | 1 | 0 | 78  | 7.5 | 15  |
| 0 | 1 | 1 | 1 | 1 | 0 | 79  | 7.5 | 15  |
| 0 | 1 | 1 | 1 | 1 | 0 | 80  | 7.5 | 15  |
| 0 | 1 | 1 | 1 | 1 | 0 | 81  | 7.5 | 15  |
| 0 | 1 | 1 | 1 | 1 | 0 | 82  | 7.5 | 15  |
| 0 | 1 | 1 | 1 | 1 | 0 | 83  | 7.5 | 15  |
| 0 | 1 | 1 | 1 | 1 | 0 | 84  | 7.5 | 15  |
| 0 | 1 | 1 | 1 | 1 | 0 | 85  | 7.5 | 15  |
| 0 | 1 | 1 | 1 | 1 | 0 | 86  | 7.5 | 15  |
| 0 | 1 | 1 | 1 | 1 | 0 | 87  | 7.5 | 15  |
| 0 | 1 | 1 | 1 | 1 | 0 | 88  | 7.5 | 15  |
| 0 | 1 | 1 | 1 | 1 | 0 | 89  | 7.5 | 15  |
| 0 | 1 | 1 | 1 | 1 | 0 | 90  | 7.5 | 165 |
| 0 | 1 | 1 | 1 | 1 | 0 | 91  | 7.5 | 165 |
| 0 | 1 | 1 | 1 | 1 | 0 | 92  | 7.5 | 165 |
| 0 | 1 | 1 | 1 | 1 | 0 | 93  | 7.5 | 165 |
| 0 | 1 | 1 | 1 | 1 | 0 | 94  | 7.5 | 165 |
| 0 | 1 | 1 | 1 | 1 | 0 | 95  | 7.5 | 165 |
| 0 | 1 | 1 | 1 | 1 | 0 | 96  | 7.5 | 165 |
| 0 | 1 | 1 | 1 | 1 | 0 | 97  | 7.5 | 165 |
| 0 | 1 | 1 | 1 | 1 | 0 | 98  | 7.5 | 165 |
| 0 | 1 | 1 | 1 | 1 | 0 | 99  | 7.5 | 165 |
| 0 | 1 | 1 | 1 | 1 | 0 | 100 | 7.5 | 165 |
| 0 | 1 | 1 | 1 | 1 | 0 | 101 | 7.5 | 165 |
| 0 | 1 | 1 | 1 | 1 | 0 | 102 | 7.5 | 165 |
| 0 | 1 | 1 | 1 | 1 | 0 | 103 | 7.5 | 165 |
| 0 | 1 | 1 | 1 | 1 | 0 | 104 | 7.5 | 165 |
| 0 | 1 | 1 | 1 | 1 | 0 | 105 | 7.5 | 165 |
| 0 | 1 | 1 | 1 | 1 | 0 | 106 | 7.5 | 165 |
| 0 | 1 | 1 | 1 | 1 | 0 | 107 | 7.5 | 165 |
| 0 | 1 | 1 | 1 | 1 | 0 | 108 | 7.5 | 165 |
| 0 | 1 | 1 | 1 | 1 | 0 | 109 | 7.5 | 165 |
| 0 | 1 | 1 | 1 | 1 | 0 | 110 | 7.5 | 165 |
| 0 | 1 | 1 | 1 | 1 | 0 | 111 | 7.5 | 165 |
| 0 | 1 | 1 | 1 | 1 | 0 | 112 | 7.5 | 165 |
| 0 | 1 | 1 | 1 | 1 | 0 | 113 | 7.5 | 165 |
| 0 | 1 | 1 | 1 | 1 | 0 | 114 | 7.5 | 165 |
| 0 | 1 | 1 | 1 | 1 | 0 | 115 | 7.5 | 165 |
| 0 | 1 | 1 | 1 | 1 | 0 | 116 | 7.5 | 165 |
| 0 | 1 | 1 | 1 | 1 | 0 | 117 | 7.5 | 165 |
| 0 | 1 | 1 | 1 | 1 | 0 | 118 | 7.5 | 165 |
| 0 | 1 | 1 | 1 | 1 | 0 | 119 | 7.5 | 165 |
| 0 | 1 | 1 | 1 | 1 | 0 | 120 | 7.5 | 165 |
| 0 | 1 | 1 | 1 | 1 | 0 | 121 | 7.5 | 165 |
| 0 | 1 | 1 | 1 | 1 | 0 | 122 | 7.5 | 165 |
| 0 | 1 | 1 | 1 | 1 | 0 | 123 | 7.5 | 165 |
| 0 | 1 | 1 | 1 | 1 | 0 | 124 | 7.5 | 165 |

|   |   |   |   |   |   |     |     |     |
|---|---|---|---|---|---|-----|-----|-----|
| 0 | 1 | 1 | 1 | 1 | 0 | 125 | 7.5 | 165 |
| 0 | 1 | 1 | 1 | 1 | 0 | 126 | 7.5 | 165 |
| 0 | 1 | 1 | 1 | 1 | 0 | 127 | 7.5 | 165 |
| 0 | 1 | 1 | 1 | 1 | 0 | 128 | 7.5 | 165 |
| 0 | 1 | 1 | 1 | 1 | 0 | 129 | 7.5 | 165 |
| 0 | 1 | 1 | 1 | 1 | 0 | 130 | 7.5 | 165 |
| 0 | 1 | 1 | 1 | 1 | 0 | 131 | 7.5 | 165 |
| 0 | 1 | 1 | 1 | 1 | 0 | 132 | 7.5 | 165 |
| 0 | 1 | 1 | 1 | 1 | 0 | 133 | 7.5 | 165 |
| 0 | 1 | 1 | 1 | 1 | 0 | 134 | 7.5 | 165 |
| 0 | 1 | 1 | 1 | 1 | 0 | 135 | 7.5 | 165 |
| 0 | 1 | 1 | 1 | 1 | 0 | 136 | 7.5 | 165 |
| 0 | 1 | 1 | 1 | 1 | 0 | 137 | 7.5 | 165 |
| 0 | 1 | 1 | 1 | 1 | 0 | 138 | 7.5 | 165 |
| 0 | 1 | 1 | 1 | 1 | 0 | 139 | 7.5 | 165 |
| 0 | 1 | 1 | 1 | 1 | 0 | 140 | 7.5 | 165 |
| 0 | 1 | 1 | 1 | 1 | 0 | 141 | 7.5 | 165 |
| 0 | 1 | 1 | 1 | 1 | 0 | 142 | 7.5 | 165 |
| 0 | 1 | 1 | 1 | 1 | 0 | 143 | 7.5 | 165 |
| 0 | 1 | 1 | 1 | 1 | 0 | 144 | 7.5 | 165 |
| 0 | 1 | 1 | 1 | 1 | 0 | 145 | 7.5 | 165 |
| 0 | 1 | 1 | 1 | 1 | 0 | 146 | 7.5 | 165 |
| 0 | 1 | 1 | 1 | 1 | 0 | 147 | 7.5 | 165 |
| 0 | 1 | 1 | 1 | 1 | 0 | 148 | 7.5 | 165 |
| 0 | 1 | 1 | 1 | 1 | 0 | 149 | 7.5 | 165 |
| 0 | 1 | 1 | 1 | 1 | 0 | 150 | 7.5 | 165 |
| 0 | 1 | 1 | 1 | 1 | 0 | 151 | 7.5 | 165 |
| 0 | 1 | 1 | 1 | 1 | 0 | 152 | 7.5 | 165 |
| 0 | 1 | 1 | 1 | 1 | 0 | 153 | 7.5 | 165 |
| 0 | 1 | 1 | 1 | 1 | 0 | 154 | 7.5 | 165 |
| 0 | 1 | 1 | 1 | 1 | 0 | 155 | 7.5 | 165 |
| 0 | 1 | 1 | 1 | 1 | 0 | 156 | 7.5 | 165 |
| 0 | 1 | 1 | 1 | 1 | 0 | 157 | 7.5 | 165 |
| 0 | 1 | 1 | 1 | 1 | 0 | 158 | 7.5 | 165 |
| 0 | 1 | 1 | 1 | 1 | 0 | 159 | 7.5 | 165 |
| 0 | 1 | 1 | 1 | 1 | 0 | 160 | 7.5 | 165 |
| 0 | 1 | 1 | 1 | 1 | 0 | 161 | 7.5 | 165 |
| 0 | 1 | 1 | 1 | 1 | 0 | 162 | 7.5 | 165 |
| 0 | 1 | 1 | 1 | 1 | 0 | 163 | 7.5 | 165 |
| 0 | 1 | 1 | 1 | 1 | 0 | 164 | 7.5 | 165 |
| 0 | 1 | 1 | 1 | 1 | 0 | 165 | 7.5 | 165 |
| 0 | 1 | 1 | 1 | 1 | 0 | 166 | 7.5 | 165 |
| 0 | 1 | 1 | 1 | 1 | 0 | 167 | 7.5 | 165 |
| 0 | 1 | 1 | 1 | 1 | 0 | 168 | 7.5 | 165 |
| 0 | 1 | 1 | 1 | 1 | 0 | 169 | 7.5 | 165 |
| 0 | 1 | 1 | 1 | 1 | 0 | 170 | 7.5 | 165 |

|   |   |   |   |   |   |     |     |     |
|---|---|---|---|---|---|-----|-----|-----|
| 0 | 1 | 1 | 1 | 1 | 0 | 171 | 7.5 | 165 |
| 0 | 1 | 1 | 1 | 1 | 0 | 172 | 7.5 | 165 |
| 0 | 1 | 1 | 1 | 1 | 0 | 173 | 7.5 | 165 |
| 0 | 1 | 1 | 1 | 1 | 0 | 174 | 7.5 | 165 |
| 0 | 1 | 1 | 1 | 1 | 0 | 175 | 7.5 | 165 |
| 0 | 1 | 1 | 1 | 1 | 0 | 176 | 7.5 | 165 |
| 0 | 1 | 1 | 1 | 1 | 0 | 177 | 7.5 | 165 |
| 0 | 1 | 1 | 1 | 1 | 0 | 178 | 7.5 | 165 |
| 0 | 1 | 1 | 1 | 1 | 0 | 179 | 7.5 | 165 |
| 0 | 1 | 1 | 1 | 1 | 0 | 180 | 7.5 | 180 |
| 0 | 1 | 1 | 1 | 0 | 1 | 0   | 7.5 | 0   |
| 0 | 1 | 1 | 1 | 0 | 1 | 1   | 7.5 | 15  |
| 0 | 1 | 1 | 1 | 0 | 1 | 2   | 7.5 | 15  |
| 0 | 1 | 1 | 1 | 0 | 1 | 3   | 7.5 | 15  |
| 0 | 1 | 1 | 1 | 0 | 1 | 4   | 7.5 | 15  |
| 0 | 1 | 1 | 1 | 0 | 1 | 5   | 7.5 | 15  |
| 0 | 1 | 1 | 1 | 0 | 1 | 6   | 7.5 | 15  |
| 0 | 1 | 1 | 1 | 0 | 1 | 7   | 7.5 | 15  |
| 0 | 1 | 1 | 1 | 0 | 1 | 8   | 7.5 | 15  |
| 0 | 1 | 1 | 1 | 0 | 1 | 9   | 7.5 | 15  |
| 0 | 1 | 1 | 1 | 0 | 1 | 10  | 7.5 | 15  |
| 0 | 1 | 1 | 1 | 0 | 1 | 11  | 7.5 | 15  |
| 0 | 1 | 1 | 1 | 0 | 1 | 12  | 7.5 | 15  |
| 0 | 1 | 1 | 1 | 0 | 1 | 13  | 7.5 | 15  |
| 0 | 1 | 1 | 1 | 0 | 1 | 14  | 7.5 | 15  |
| 0 | 1 | 1 | 1 | 0 | 1 | 15  | 7.5 | 15  |
| 0 | 1 | 1 | 1 | 0 | 1 | 16  | 7.5 | 15  |
| 0 | 1 | 1 | 1 | 0 | 1 | 17  | 7.5 | 15  |
| 0 | 1 | 1 | 1 | 0 | 1 | 18  | 7.5 | 15  |
| 0 | 1 | 1 | 1 | 0 | 1 | 19  | 7.5 | 15  |
| 0 | 1 | 1 | 1 | 0 | 1 | 20  | 7.5 | 15  |
| 0 | 1 | 1 | 1 | 0 | 1 | 21  | 7.5 | 15  |
| 0 | 1 | 1 | 1 | 0 | 1 | 22  | 7.5 | 15  |
| 0 | 1 | 1 | 1 | 0 | 1 | 23  | 7.5 | 15  |
| 0 | 1 | 1 | 1 | 0 | 1 | 24  | 7.5 | 15  |
| 0 | 1 | 1 | 1 | 0 | 1 | 25  | 7.5 | 15  |
| 0 | 1 | 1 | 1 | 0 | 1 | 26  | 7.5 | 15  |
| 0 | 1 | 1 | 1 | 0 | 1 | 27  | 7.5 | 15  |
| 0 | 1 | 1 | 1 | 0 | 1 | 28  | 7.5 | 15  |
| 0 | 1 | 1 | 1 | 0 | 1 | 29  | 7.5 | 15  |
| 0 | 1 | 1 | 1 | 0 | 1 | 30  | 7.5 | 15  |
| 0 | 1 | 1 | 1 | 0 | 1 | 31  | 7.5 | 15  |
| 0 | 1 | 1 | 1 | 0 | 1 | 32  | 7.5 | 15  |
| 0 | 1 | 1 | 1 | 0 | 1 | 33  | 7.5 | 15  |
| 0 | 1 | 1 | 1 | 0 | 1 | 34  | 7.5 | 15  |
| 0 | 1 | 1 | 1 | 0 | 1 | 35  | 7.5 | 15  |

|   |   |   |   |   |   |    |     |     |
|---|---|---|---|---|---|----|-----|-----|
| 0 | 1 | 1 | 1 | 0 | 1 | 36 | 7.5 | 15  |
| 0 | 1 | 1 | 1 | 0 | 1 | 37 | 7.5 | 15  |
| 0 | 1 | 1 | 1 | 0 | 1 | 38 | 7.5 | 15  |
| 0 | 1 | 1 | 1 | 0 | 1 | 39 | 7.5 | 15  |
| 0 | 1 | 1 | 1 | 0 | 1 | 40 | 7.5 | 15  |
| 0 | 1 | 1 | 1 | 0 | 1 | 41 | 7.5 | 15  |
| 0 | 1 | 1 | 1 | 0 | 1 | 42 | 7.5 | 15  |
| 0 | 1 | 1 | 1 | 0 | 1 | 43 | 7.5 | 15  |
| 0 | 1 | 1 | 1 | 0 | 1 | 44 | 7.5 | 15  |
| 0 | 1 | 1 | 1 | 0 | 1 | 45 | 7.5 | 15  |
| 0 | 1 | 1 | 1 | 0 | 1 | 46 | 7.5 | 15  |
| 0 | 1 | 1 | 1 | 0 | 1 | 47 | 7.5 | 15  |
| 0 | 1 | 1 | 1 | 0 | 1 | 48 | 7.5 | 15  |
| 0 | 1 | 1 | 1 | 0 | 1 | 49 | 7.5 | 15  |
| 0 | 1 | 1 | 1 | 0 | 1 | 50 | 7.5 | 15  |
| 0 | 1 | 1 | 1 | 0 | 1 | 51 | 7.5 | 15  |
| 0 | 1 | 1 | 1 | 0 | 1 | 52 | 7.5 | 15  |
| 0 | 1 | 1 | 1 | 0 | 1 | 53 | 7.5 | 15  |
| 0 | 1 | 1 | 1 | 0 | 1 | 54 | 7.5 | 15  |
| 0 | 1 | 1 | 1 | 0 | 1 | 55 | 7.5 | 15  |
| 0 | 1 | 1 | 1 | 0 | 1 | 56 | 7.5 | 15  |
| 0 | 1 | 1 | 1 | 0 | 1 | 57 | 7.5 | 15  |
| 0 | 1 | 1 | 1 | 0 | 1 | 58 | 7.5 | 15  |
| 0 | 1 | 1 | 1 | 0 | 1 | 59 | 7.5 | 15  |
| 0 | 1 | 1 | 1 | 0 | 1 | 60 | 7.5 | 15  |
| 0 | 1 | 1 | 1 | 0 | 1 | 61 | 7.5 | 15  |
| 0 | 1 | 1 | 1 | 0 | 1 | 62 | 7.5 | 15  |
| 0 | 1 | 1 | 1 | 0 | 1 | 63 | 7.5 | 15  |
| 0 | 1 | 1 | 1 | 0 | 1 | 64 | 7.5 | 15  |
| 0 | 1 | 1 | 1 | 0 | 1 | 65 | 7.5 | 15  |
| 0 | 1 | 1 | 1 | 0 | 1 | 66 | 7.5 | 15  |
| 0 | 1 | 1 | 1 | 0 | 1 | 67 | 7.5 | 15  |
| 0 | 1 | 1 | 1 | 0 | 1 | 68 | 7.5 | 15  |
| 0 | 1 | 1 | 1 | 0 | 1 | 69 | 7.5 | 15  |
| 0 | 1 | 1 | 1 | 0 | 1 | 70 | 7.5 | 15  |
| 0 | 1 | 1 | 1 | 0 | 1 | 71 | 7.5 | 15  |
| 0 | 1 | 1 | 1 | 0 | 1 | 72 | 7.5 | 15  |
| 0 | 1 | 1 | 1 | 0 | 1 | 73 | 7.5 | 15  |
| 0 | 1 | 1 | 1 | 0 | 1 | 74 | 7.5 | 15  |
| 0 | 1 | 1 | 1 | 0 | 1 | 75 | 7.5 | 15  |
| 0 | 1 | 1 | 1 | 0 | 1 | 76 | 7.5 | 135 |
| 0 | 1 | 1 | 1 | 0 | 1 | 77 | 7.5 | 135 |
| 0 | 1 | 1 | 1 | 0 | 1 | 78 | 7.5 | 135 |
| 0 | 1 | 1 | 1 | 0 | 1 | 79 | 7.5 | 135 |
| 0 | 1 | 1 | 1 | 0 | 1 | 80 | 7.5 | 135 |
| 0 | 1 | 1 | 1 | 0 | 1 | 81 | 7.5 | 135 |

|   |   |   |   |   |   |     |     |     |
|---|---|---|---|---|---|-----|-----|-----|
| 0 | 1 | 1 | 1 | 0 | 1 | 82  | 7.5 | 135 |
| 0 | 1 | 1 | 1 | 0 | 1 | 83  | 7.5 | 135 |
| 0 | 1 | 1 | 1 | 0 | 1 | 84  | 7.5 | 135 |
| 0 | 1 | 1 | 1 | 0 | 1 | 85  | 7.5 | 135 |
| 0 | 1 | 1 | 1 | 0 | 1 | 86  | 7.5 | 135 |
| 0 | 1 | 1 | 1 | 0 | 1 | 87  | 7.5 | 135 |
| 0 | 1 | 1 | 1 | 0 | 1 | 88  | 7.5 | 135 |
| 0 | 1 | 1 | 1 | 0 | 1 | 89  | 7.5 | 135 |
| 0 | 1 | 1 | 1 | 0 | 1 | 90  | 7.5 | 135 |
| 0 | 1 | 1 | 1 | 0 | 1 | 91  | 7.5 | 135 |
| 0 | 1 | 1 | 1 | 0 | 1 | 92  | 7.5 | 135 |
| 0 | 1 | 1 | 1 | 0 | 1 | 93  | 7.5 | 135 |
| 0 | 1 | 1 | 1 | 0 | 1 | 94  | 7.5 | 135 |
| 0 | 1 | 1 | 1 | 0 | 1 | 95  | 7.5 | 135 |
| 0 | 1 | 1 | 1 | 0 | 1 | 96  | 7.5 | 135 |
| 0 | 1 | 1 | 1 | 0 | 1 | 97  | 7.5 | 135 |
| 0 | 1 | 1 | 1 | 0 | 1 | 98  | 7.5 | 135 |
| 0 | 1 | 1 | 1 | 0 | 1 | 99  | 7.5 | 135 |
| 0 | 1 | 1 | 1 | 0 | 1 | 100 | 7.5 | 135 |
| 0 | 1 | 1 | 1 | 0 | 1 | 101 | 7.5 | 135 |
| 0 | 1 | 1 | 1 | 0 | 1 | 102 | 7.5 | 135 |
| 0 | 1 | 1 | 1 | 0 | 1 | 103 | 7.5 | 135 |
| 0 | 1 | 1 | 1 | 0 | 1 | 104 | 7.5 | 135 |
| 0 | 1 | 1 | 1 | 0 | 1 | 105 | 7.5 | 135 |
| 0 | 1 | 1 | 1 | 0 | 1 | 106 | 7.5 | 135 |
| 0 | 1 | 1 | 1 | 0 | 1 | 107 | 7.5 | 135 |
| 0 | 1 | 1 | 1 | 0 | 1 | 108 | 7.5 | 135 |
| 0 | 1 | 1 | 1 | 0 | 1 | 109 | 7.5 | 135 |
| 0 | 1 | 1 | 1 | 0 | 1 | 110 | 7.5 | 135 |
| 0 | 1 | 1 | 1 | 0 | 1 | 111 | 7.5 | 135 |
| 0 | 1 | 1 | 1 | 0 | 1 | 112 | 7.5 | 135 |
| 0 | 1 | 1 | 1 | 0 | 1 | 113 | 7.5 | 135 |
| 0 | 1 | 1 | 1 | 0 | 1 | 114 | 7.5 | 135 |
| 0 | 1 | 1 | 1 | 0 | 1 | 115 | 7.5 | 135 |
| 0 | 1 | 1 | 1 | 0 | 1 | 116 | 7.5 | 135 |
| 0 | 1 | 1 | 1 | 0 | 1 | 117 | 7.5 | 135 |
| 0 | 1 | 1 | 1 | 0 | 1 | 118 | 7.5 | 135 |
| 0 | 1 | 1 | 1 | 0 | 1 | 119 | 7.5 | 135 |
| 0 | 1 | 1 | 1 | 0 | 1 | 120 | 7.5 | 135 |
| 0 | 1 | 1 | 1 | 0 | 1 | 121 | 7.5 | 135 |
| 0 | 1 | 1 | 1 | 0 | 1 | 122 | 7.5 | 135 |
| 0 | 1 | 1 | 1 | 0 | 1 | 123 | 7.5 | 135 |
| 0 | 1 | 1 | 1 | 0 | 1 | 124 | 7.5 | 135 |
| 0 | 1 | 1 | 1 | 0 | 1 | 125 | 7.5 | 135 |
| 0 | 1 | 1 | 1 | 0 | 1 | 126 | 7.5 | 135 |
| 0 | 1 | 1 | 1 | 0 | 1 | 127 | 7.5 | 135 |

|   |   |   |   |   |   |     |     |     |
|---|---|---|---|---|---|-----|-----|-----|
| 0 | 1 | 1 | 1 | 0 | 1 | 128 | 7.5 | 135 |
| 0 | 1 | 1 | 1 | 0 | 1 | 129 | 7.5 | 135 |
| 0 | 1 | 1 | 1 | 0 | 1 | 130 | 7.5 | 135 |
| 0 | 1 | 1 | 1 | 0 | 1 | 131 | 7.5 | 135 |
| 0 | 1 | 1 | 1 | 0 | 1 | 132 | 7.5 | 135 |
| 0 | 1 | 1 | 1 | 0 | 1 | 133 | 7.5 | 135 |
| 0 | 1 | 1 | 1 | 0 | 1 | 134 | 7.5 | 135 |
| 0 | 1 | 1 | 1 | 0 | 1 | 135 | 7.5 | 135 |
| 0 | 1 | 1 | 1 | 0 | 1 | 136 | 7.5 | 135 |
| 0 | 1 | 1 | 1 | 0 | 1 | 137 | 7.5 | 135 |
| 0 | 1 | 1 | 1 | 0 | 1 | 138 | 7.5 | 135 |
| 0 | 1 | 1 | 1 | 0 | 1 | 139 | 7.5 | 135 |
| 0 | 1 | 1 | 1 | 0 | 1 | 140 | 7.5 | 135 |
| 0 | 1 | 1 | 1 | 0 | 1 | 141 | 7.5 | 135 |
| 0 | 1 | 1 | 1 | 0 | 1 | 142 | 7.5 | 135 |
| 0 | 1 | 1 | 1 | 0 | 1 | 143 | 7.5 | 135 |
| 0 | 1 | 1 | 1 | 0 | 1 | 144 | 7.5 | 135 |
| 0 | 1 | 1 | 1 | 0 | 1 | 145 | 7.5 | 135 |
| 0 | 1 | 1 | 1 | 0 | 1 | 146 | 7.5 | 135 |
| 0 | 1 | 1 | 1 | 0 | 1 | 147 | 7.5 | 135 |
| 0 | 1 | 1 | 1 | 0 | 1 | 148 | 7.5 | 135 |
| 0 | 1 | 1 | 1 | 0 | 1 | 149 | 7.5 | 135 |
| 0 | 1 | 1 | 1 | 0 | 1 | 150 | 7.5 | 135 |
| 0 | 1 | 1 | 1 | 0 | 1 | 151 | 7.5 | 135 |
| 0 | 1 | 1 | 1 | 0 | 1 | 152 | 7.5 | 135 |
| 0 | 1 | 1 | 1 | 0 | 1 | 153 | 7.5 | 135 |
| 0 | 1 | 1 | 1 | 0 | 1 | 154 | 7.5 | 135 |
| 0 | 1 | 1 | 1 | 0 | 1 | 155 | 7.5 | 135 |
| 0 | 1 | 1 | 1 | 0 | 1 | 156 | 7.5 | 135 |
| 0 | 1 | 1 | 1 | 0 | 1 | 157 | 7.5 | 135 |
| 0 | 1 | 1 | 1 | 0 | 1 | 158 | 7.5 | 135 |
| 0 | 1 | 1 | 1 | 0 | 1 | 159 | 7.5 | 135 |
| 0 | 1 | 1 | 1 | 0 | 1 | 160 | 7.5 | 135 |
| 0 | 1 | 1 | 1 | 0 | 1 | 161 | 7.5 | 135 |
| 0 | 1 | 1 | 1 | 0 | 1 | 162 | 7.5 | 135 |
| 0 | 1 | 1 | 1 | 0 | 1 | 163 | 7.5 | 135 |
| 0 | 1 | 1 | 1 | 0 | 1 | 164 | 7.5 | 135 |
| 0 | 1 | 1 | 1 | 0 | 1 | 165 | 7.5 | 135 |
| 0 | 1 | 1 | 1 | 0 | 1 | 166 | 7.5 | 135 |
| 0 | 1 | 1 | 1 | 0 | 1 | 167 | 7.5 | 135 |
| 0 | 1 | 1 | 1 | 0 | 1 | 168 | 7.5 | 135 |
| 0 | 1 | 1 | 1 | 0 | 1 | 169 | 7.5 | 135 |
| 0 | 1 | 1 | 1 | 0 | 1 | 170 | 7.5 | 135 |
| 0 | 1 | 1 | 1 | 0 | 1 | 171 | 7.5 | 135 |
| 0 | 1 | 1 | 1 | 0 | 1 | 172 | 7.5 | 135 |
| 0 | 1 | 1 | 1 | 0 | 1 | 173 | 7.5 | 135 |

|   |   |   |   |   |   |     |     |     |
|---|---|---|---|---|---|-----|-----|-----|
| 0 | 1 | 1 | 1 | 0 | 1 | 174 | 7.5 | 135 |
| 0 | 1 | 1 | 1 | 0 | 1 | 175 | 7.5 | 135 |
| 0 | 1 | 1 | 1 | 0 | 1 | 176 | 7.5 | 135 |
| 0 | 1 | 1 | 1 | 0 | 1 | 177 | 7.5 | 135 |
| 0 | 1 | 1 | 1 | 0 | 1 | 178 | 7.5 | 135 |
| 0 | 1 | 1 | 1 | 0 | 1 | 179 | 7.5 | 135 |
| 0 | 1 | 1 | 1 | 0 | 1 | 180 | 7.5 | 135 |
| 0 | 1 | 1 | 0 | 1 | 1 | 0   | 7.5 | 0   |
| 0 | 1 | 1 | 0 | 1 | 1 | 1   | 7.5 | 15  |
| 0 | 1 | 1 | 0 | 1 | 1 | 2   | 7.5 | 15  |
| 0 | 1 | 1 | 0 | 1 | 1 | 3   | 7.5 | 15  |
| 0 | 1 | 1 | 0 | 1 | 1 | 4   | 7.5 | 15  |
| 0 | 1 | 1 | 0 | 1 | 1 | 5   | 7.5 | 15  |
| 0 | 1 | 1 | 0 | 1 | 1 | 6   | 7.5 | 15  |
| 0 | 1 | 1 | 0 | 1 | 1 | 7   | 7.5 | 15  |
| 0 | 1 | 1 | 0 | 1 | 1 | 8   | 7.5 | 15  |
| 0 | 1 | 1 | 0 | 1 | 1 | 9   | 7.5 | 15  |
| 0 | 1 | 1 | 0 | 1 | 1 | 10  | 7.5 | 15  |
| 0 | 1 | 1 | 0 | 1 | 1 | 11  | 7.5 | 15  |
| 0 | 1 | 1 | 0 | 1 | 1 | 12  | 7.5 | 15  |
| 0 | 1 | 1 | 0 | 1 | 1 | 13  | 7.5 | 15  |
| 0 | 1 | 1 | 0 | 1 | 1 | 14  | 7.5 | 15  |
| 0 | 1 | 1 | 0 | 1 | 1 | 15  | 7.5 | 15  |
| 0 | 1 | 1 | 0 | 1 | 1 | 16  | 7.5 | 15  |
| 0 | 1 | 1 | 0 | 1 | 1 | 17  | 7.5 | 15  |
| 0 | 1 | 1 | 0 | 1 | 1 | 18  | 7.5 | 15  |
| 0 | 1 | 1 | 0 | 1 | 1 | 19  | 7.5 | 15  |
| 0 | 1 | 1 | 0 | 1 | 1 | 20  | 7.5 | 15  |
| 0 | 1 | 1 | 0 | 1 | 1 | 21  | 7.5 | 15  |
| 0 | 1 | 1 | 0 | 1 | 1 | 22  | 7.5 | 15  |
| 0 | 1 | 1 | 0 | 1 | 1 | 23  | 7.5 | 15  |
| 0 | 1 | 1 | 0 | 1 | 1 | 24  | 7.5 | 15  |
| 0 | 1 | 1 | 0 | 1 | 1 | 25  | 7.5 | 15  |
| 0 | 1 | 1 | 0 | 1 | 1 | 26  | 7.5 | 15  |
| 0 | 1 | 1 | 0 | 1 | 1 | 27  | 7.5 | 15  |
| 0 | 1 | 1 | 0 | 1 | 1 | 28  | 7.5 | 15  |
| 0 | 1 | 1 | 0 | 1 | 1 | 29  | 7.5 | 15  |
| 0 | 1 | 1 | 0 | 1 | 1 | 30  | 7.5 | 15  |
| 0 | 1 | 1 | 0 | 1 | 1 | 31  | 7.5 | 15  |
| 0 | 1 | 1 | 0 | 1 | 1 | 32  | 7.5 | 15  |
| 0 | 1 | 1 | 0 | 1 | 1 | 33  | 7.5 | 15  |
| 0 | 1 | 1 | 0 | 1 | 1 | 34  | 7.5 | 15  |
| 0 | 1 | 1 | 0 | 1 | 1 | 35  | 7.5 | 15  |
| 0 | 1 | 1 | 0 | 1 | 1 | 36  | 7.5 | 15  |
| 0 | 1 | 1 | 0 | 1 | 1 | 37  | 7.5 | 15  |
| 0 | 1 | 1 | 0 | 1 | 1 | 38  | 7.5 | 15  |

|   |   |   |   |   |   |    |     |     |
|---|---|---|---|---|---|----|-----|-----|
| 0 | 1 | 1 | 0 | 1 | 1 | 39 | 7.5 | 15  |
| 0 | 1 | 1 | 0 | 1 | 1 | 40 | 7.5 | 15  |
| 0 | 1 | 1 | 0 | 1 | 1 | 41 | 7.5 | 15  |
| 0 | 1 | 1 | 0 | 1 | 1 | 42 | 7.5 | 15  |
| 0 | 1 | 1 | 0 | 1 | 1 | 43 | 7.5 | 15  |
| 0 | 1 | 1 | 0 | 1 | 1 | 44 | 7.5 | 15  |
| 0 | 1 | 1 | 0 | 1 | 1 | 45 | 7.5 | 15  |
| 0 | 1 | 1 | 0 | 1 | 1 | 46 | 7.5 | 15  |
| 0 | 1 | 1 | 0 | 1 | 1 | 47 | 7.5 | 15  |
| 0 | 1 | 1 | 0 | 1 | 1 | 48 | 7.5 | 15  |
| 0 | 1 | 1 | 0 | 1 | 1 | 49 | 7.5 | 15  |
| 0 | 1 | 1 | 0 | 1 | 1 | 50 | 7.5 | 15  |
| 0 | 1 | 1 | 0 | 1 | 1 | 51 | 7.5 | 15  |
| 0 | 1 | 1 | 0 | 1 | 1 | 52 | 7.5 | 15  |
| 0 | 1 | 1 | 0 | 1 | 1 | 53 | 7.5 | 15  |
| 0 | 1 | 1 | 0 | 1 | 1 | 54 | 7.5 | 15  |
| 0 | 1 | 1 | 0 | 1 | 1 | 55 | 7.5 | 15  |
| 0 | 1 | 1 | 0 | 1 | 1 | 56 | 7.5 | 15  |
| 0 | 1 | 1 | 0 | 1 | 1 | 57 | 7.5 | 15  |
| 0 | 1 | 1 | 0 | 1 | 1 | 58 | 7.5 | 15  |
| 0 | 1 | 1 | 0 | 1 | 1 | 59 | 7.5 | 15  |
| 0 | 1 | 1 | 0 | 1 | 1 | 60 | 7.5 | 105 |
| 0 | 1 | 1 | 0 | 1 | 1 | 61 | 7.5 | 105 |
| 0 | 1 | 1 | 0 | 1 | 1 | 62 | 7.5 | 105 |
| 0 | 1 | 1 | 0 | 1 | 1 | 63 | 7.5 | 105 |
| 0 | 1 | 1 | 0 | 1 | 1 | 64 | 7.5 | 105 |
| 0 | 1 | 1 | 0 | 1 | 1 | 65 | 7.5 | 105 |
| 0 | 1 | 1 | 0 | 1 | 1 | 66 | 7.5 | 105 |
| 0 | 1 | 1 | 0 | 1 | 1 | 67 | 7.5 | 105 |
| 0 | 1 | 1 | 0 | 1 | 1 | 68 | 7.5 | 105 |
| 0 | 1 | 1 | 0 | 1 | 1 | 69 | 7.5 | 105 |
| 0 | 1 | 1 | 0 | 1 | 1 | 70 | 7.5 | 105 |
| 0 | 1 | 1 | 0 | 1 | 1 | 71 | 7.5 | 105 |
| 0 | 1 | 1 | 0 | 1 | 1 | 72 | 7.5 | 105 |
| 0 | 1 | 1 | 0 | 1 | 1 | 73 | 7.5 | 105 |
| 0 | 1 | 1 | 0 | 1 | 1 | 74 | 7.5 | 105 |
| 0 | 1 | 1 | 0 | 1 | 1 | 75 | 7.5 | 105 |
| 0 | 1 | 1 | 0 | 1 | 1 | 76 | 7.5 | 105 |
| 0 | 1 | 1 | 0 | 1 | 1 | 77 | 7.5 | 105 |
| 0 | 1 | 1 | 0 | 1 | 1 | 78 | 7.5 | 105 |
| 0 | 1 | 1 | 0 | 1 | 1 | 79 | 7.5 | 105 |
| 0 | 1 | 1 | 0 | 1 | 1 | 80 | 7.5 | 105 |
| 0 | 1 | 1 | 0 | 1 | 1 | 81 | 7.5 | 105 |
| 0 | 1 | 1 | 0 | 1 | 1 | 82 | 7.5 | 105 |
| 0 | 1 | 1 | 0 | 1 | 1 | 83 | 7.5 | 105 |
| 0 | 1 | 1 | 0 | 1 | 1 | 84 | 7.5 | 105 |

|   |   |   |   |   |   |     |     |     |
|---|---|---|---|---|---|-----|-----|-----|
| 0 | 1 | 1 | 0 | 1 | 1 | 85  | 7.5 | 105 |
| 0 | 1 | 1 | 0 | 1 | 1 | 86  | 7.5 | 105 |
| 0 | 1 | 1 | 0 | 1 | 1 | 87  | 7.5 | 105 |
| 0 | 1 | 1 | 0 | 1 | 1 | 88  | 7.5 | 105 |
| 0 | 1 | 1 | 0 | 1 | 1 | 89  | 7.5 | 105 |
| 0 | 1 | 1 | 0 | 1 | 1 | 90  | 7.5 | 105 |
| 0 | 1 | 1 | 0 | 1 | 1 | 91  | 7.5 | 105 |
| 0 | 1 | 1 | 0 | 1 | 1 | 92  | 7.5 | 105 |
| 0 | 1 | 1 | 0 | 1 | 1 | 93  | 7.5 | 105 |
| 0 | 1 | 1 | 0 | 1 | 1 | 94  | 7.5 | 105 |
| 0 | 1 | 1 | 0 | 1 | 1 | 95  | 7.5 | 105 |
| 0 | 1 | 1 | 0 | 1 | 1 | 96  | 7.5 | 105 |
| 0 | 1 | 1 | 0 | 1 | 1 | 97  | 7.5 | 105 |
| 0 | 1 | 1 | 0 | 1 | 1 | 98  | 7.5 | 105 |
| 0 | 1 | 1 | 0 | 1 | 1 | 99  | 7.5 | 105 |
| 0 | 1 | 1 | 0 | 1 | 1 | 100 | 7.5 | 105 |
| 0 | 1 | 1 | 0 | 1 | 1 | 101 | 7.5 | 105 |
| 0 | 1 | 1 | 0 | 1 | 1 | 102 | 7.5 | 105 |
| 0 | 1 | 1 | 0 | 1 | 1 | 103 | 7.5 | 105 |
| 0 | 1 | 1 | 0 | 1 | 1 | 104 | 7.5 | 105 |
| 0 | 1 | 1 | 0 | 1 | 1 | 105 | 7.5 | 105 |
| 0 | 1 | 1 | 0 | 1 | 1 | 106 | 7.5 | 105 |
| 0 | 1 | 1 | 0 | 1 | 1 | 107 | 7.5 | 105 |
| 0 | 1 | 1 | 0 | 1 | 1 | 108 | 7.5 | 105 |
| 0 | 1 | 1 | 0 | 1 | 1 | 109 | 7.5 | 105 |
| 0 | 1 | 1 | 0 | 1 | 1 | 110 | 7.5 | 105 |
| 0 | 1 | 1 | 0 | 1 | 1 | 111 | 7.5 | 105 |
| 0 | 1 | 1 | 0 | 1 | 1 | 112 | 7.5 | 105 |
| 0 | 1 | 1 | 0 | 1 | 1 | 113 | 7.5 | 105 |
| 0 | 1 | 1 | 0 | 1 | 1 | 114 | 7.5 | 105 |
| 0 | 1 | 1 | 0 | 1 | 1 | 115 | 7.5 | 105 |
| 0 | 1 | 1 | 0 | 1 | 1 | 116 | 7.5 | 105 |
| 0 | 1 | 1 | 0 | 1 | 1 | 117 | 7.5 | 105 |
| 0 | 1 | 1 | 0 | 1 | 1 | 118 | 7.5 | 105 |
| 0 | 1 | 1 | 0 | 1 | 1 | 119 | 7.5 | 105 |
| 0 | 1 | 1 | 0 | 1 | 1 | 120 | 7.5 | 105 |
| 0 | 1 | 1 | 0 | 1 | 1 | 121 | 7.5 | 105 |
| 0 | 1 | 1 | 0 | 1 | 1 | 122 | 7.5 | 105 |
| 0 | 1 | 1 | 0 | 1 | 1 | 123 | 7.5 | 105 |
| 0 | 1 | 1 | 0 | 1 | 1 | 124 | 7.5 | 105 |
| 0 | 1 | 1 | 0 | 1 | 1 | 125 | 7.5 | 105 |
| 0 | 1 | 1 | 0 | 1 | 1 | 126 | 7.5 | 105 |
| 0 | 1 | 1 | 0 | 1 | 1 | 127 | 7.5 | 105 |
| 0 | 1 | 1 | 0 | 1 | 1 | 128 | 7.5 | 105 |
| 0 | 1 | 1 | 0 | 1 | 1 | 129 | 7.5 | 105 |
| 0 | 1 | 1 | 0 | 1 | 1 | 130 | 7.5 | 105 |

|   |   |   |   |   |   |     |     |     |
|---|---|---|---|---|---|-----|-----|-----|
| 0 | 1 | 1 | 0 | 1 | 1 | 131 | 7.5 | 105 |
| 0 | 1 | 1 | 0 | 1 | 1 | 132 | 7.5 | 105 |
| 0 | 1 | 1 | 0 | 1 | 1 | 133 | 7.5 | 105 |
| 0 | 1 | 1 | 0 | 1 | 1 | 134 | 7.5 | 105 |
| 0 | 1 | 1 | 0 | 1 | 1 | 135 | 7.5 | 105 |
| 0 | 1 | 1 | 0 | 1 | 1 | 136 | 7.5 | 105 |
| 0 | 1 | 1 | 0 | 1 | 1 | 137 | 7.5 | 105 |
| 0 | 1 | 1 | 0 | 1 | 1 | 138 | 7.5 | 105 |
| 0 | 1 | 1 | 0 | 1 | 1 | 139 | 7.5 | 105 |
| 0 | 1 | 1 | 0 | 1 | 1 | 140 | 7.5 | 105 |
| 0 | 1 | 1 | 0 | 1 | 1 | 141 | 7.5 | 105 |
| 0 | 1 | 1 | 0 | 1 | 1 | 142 | 7.5 | 105 |
| 0 | 1 | 1 | 0 | 1 | 1 | 143 | 7.5 | 105 |
| 0 | 1 | 1 | 0 | 1 | 1 | 144 | 7.5 | 105 |
| 0 | 1 | 1 | 0 | 1 | 1 | 145 | 7.5 | 105 |
| 0 | 1 | 1 | 0 | 1 | 1 | 146 | 7.5 | 105 |
| 0 | 1 | 1 | 0 | 1 | 1 | 147 | 7.5 | 105 |
| 0 | 1 | 1 | 0 | 1 | 1 | 148 | 7.5 | 105 |
| 0 | 1 | 1 | 0 | 1 | 1 | 149 | 7.5 | 105 |
| 0 | 1 | 1 | 0 | 1 | 1 | 150 | 7.5 | 105 |
| 0 | 1 | 1 | 0 | 1 | 1 | 151 | 7.5 | 105 |
| 0 | 1 | 1 | 0 | 1 | 1 | 152 | 7.5 | 105 |
| 0 | 1 | 1 | 0 | 1 | 1 | 153 | 7.5 | 105 |
| 0 | 1 | 1 | 0 | 1 | 1 | 154 | 7.5 | 105 |
| 0 | 1 | 1 | 0 | 1 | 1 | 155 | 7.5 | 105 |
| 0 | 1 | 1 | 0 | 1 | 1 | 156 | 7.5 | 105 |
| 0 | 1 | 1 | 0 | 1 | 1 | 157 | 7.5 | 105 |
| 0 | 1 | 1 | 0 | 1 | 1 | 158 | 7.5 | 105 |
| 0 | 1 | 1 | 0 | 1 | 1 | 159 | 7.5 | 105 |
| 0 | 1 | 1 | 0 | 1 | 1 | 160 | 7.5 | 105 |
| 0 | 1 | 1 | 0 | 1 | 1 | 161 | 7.5 | 105 |
| 0 | 1 | 1 | 0 | 1 | 1 | 162 | 7.5 | 105 |
| 0 | 1 | 1 | 0 | 1 | 1 | 163 | 7.5 | 105 |
| 0 | 1 | 1 | 0 | 1 | 1 | 164 | 7.5 | 105 |
| 0 | 1 | 1 | 0 | 1 | 1 | 165 | 7.5 | 105 |
| 0 | 1 | 1 | 0 | 1 | 1 | 166 | 7.5 | 105 |
| 0 | 1 | 1 | 0 | 1 | 1 | 167 | 7.5 | 105 |
| 0 | 1 | 1 | 0 | 1 | 1 | 168 | 7.5 | 105 |
| 0 | 1 | 1 | 0 | 1 | 1 | 169 | 7.5 | 105 |
| 0 | 1 | 1 | 0 | 1 | 1 | 170 | 7.5 | 105 |
| 0 | 1 | 1 | 0 | 1 | 1 | 171 | 7.5 | 105 |
| 0 | 1 | 1 | 0 | 1 | 1 | 172 | 7.5 | 105 |
| 0 | 1 | 1 | 0 | 1 | 1 | 173 | 7.5 | 105 |
| 0 | 1 | 1 | 0 | 1 | 1 | 174 | 7.5 | 105 |
| 0 | 1 | 1 | 0 | 1 | 1 | 175 | 7.5 | 105 |
| 0 | 1 | 1 | 0 | 1 | 1 | 176 | 7.5 | 105 |

|   |   |   |   |   |   |     |     |     |
|---|---|---|---|---|---|-----|-----|-----|
| 0 | 1 | 1 | 0 | 1 | 1 | 177 | 7.5 | 105 |
| 0 | 1 | 1 | 0 | 1 | 1 | 178 | 7.5 | 105 |
| 0 | 1 | 1 | 0 | 1 | 1 | 179 | 7.5 | 105 |
| 0 | 1 | 1 | 0 | 1 | 1 | 180 | 7.5 | 105 |
| 0 | 1 | 0 | 1 | 1 | 1 | 0   | 7.5 | 0   |
| 0 | 1 | 0 | 1 | 1 | 1 | 1   | 7.5 | 15  |
| 0 | 1 | 0 | 1 | 1 | 1 | 2   | 7.5 | 15  |
| 0 | 1 | 0 | 1 | 1 | 1 | 3   | 7.5 | 15  |
| 0 | 1 | 0 | 1 | 1 | 1 | 4   | 7.5 | 15  |
| 0 | 1 | 0 | 1 | 1 | 1 | 5   | 7.5 | 15  |
| 0 | 1 | 0 | 1 | 1 | 1 | 6   | 7.5 | 15  |
| 0 | 1 | 0 | 1 | 1 | 1 | 7   | 7.5 | 15  |
| 0 | 1 | 0 | 1 | 1 | 1 | 8   | 7.5 | 15  |
| 0 | 1 | 0 | 1 | 1 | 1 | 9   | 7.5 | 15  |
| 0 | 1 | 0 | 1 | 1 | 1 | 10  | 7.5 | 15  |
| 0 | 1 | 0 | 1 | 1 | 1 | 11  | 7.5 | 15  |
| 0 | 1 | 0 | 1 | 1 | 1 | 12  | 7.5 | 15  |
| 0 | 1 | 0 | 1 | 1 | 1 | 13  | 7.5 | 15  |
| 0 | 1 | 0 | 1 | 1 | 1 | 14  | 7.5 | 15  |
| 0 | 1 | 0 | 1 | 1 | 1 | 15  | 7.5 | 15  |
| 0 | 1 | 0 | 1 | 1 | 1 | 16  | 7.5 | 15  |
| 0 | 1 | 0 | 1 | 1 | 1 | 17  | 7.5 | 15  |
| 0 | 1 | 0 | 1 | 1 | 1 | 18  | 7.5 | 15  |
| 0 | 1 | 0 | 1 | 1 | 1 | 19  | 7.5 | 15  |
| 0 | 1 | 0 | 1 | 1 | 1 | 20  | 7.5 | 15  |
| 0 | 1 | 0 | 1 | 1 | 1 | 21  | 7.5 | 15  |
| 0 | 1 | 0 | 1 | 1 | 1 | 22  | 7.5 | 15  |
| 0 | 1 | 0 | 1 | 1 | 1 | 23  | 7.5 | 15  |
| 0 | 1 | 0 | 1 | 1 | 1 | 24  | 7.5 | 15  |
| 0 | 1 | 0 | 1 | 1 | 1 | 25  | 7.5 | 15  |
| 0 | 1 | 0 | 1 | 1 | 1 | 26  | 7.5 | 15  |
| 0 | 1 | 0 | 1 | 1 | 1 | 27  | 7.5 | 15  |
| 0 | 1 | 0 | 1 | 1 | 1 | 28  | 7.5 | 15  |
| 0 | 1 | 0 | 1 | 1 | 1 | 29  | 7.5 | 15  |
| 0 | 1 | 0 | 1 | 1 | 1 | 30  | 7.5 | 15  |
| 0 | 1 | 0 | 1 | 1 | 1 | 31  | 7.5 | 15  |
| 0 | 1 | 0 | 1 | 1 | 1 | 32  | 7.5 | 15  |
| 0 | 1 | 0 | 1 | 1 | 1 | 33  | 7.5 | 15  |
| 0 | 1 | 0 | 1 | 1 | 1 | 34  | 7.5 | 15  |
| 0 | 1 | 0 | 1 | 1 | 1 | 35  | 7.5 | 15  |
| 0 | 1 | 0 | 1 | 1 | 1 | 36  | 7.5 | 15  |
| 0 | 1 | 0 | 1 | 1 | 1 | 37  | 7.5 | 15  |
| 0 | 1 | 0 | 1 | 1 | 1 | 38  | 7.5 | 15  |
| 0 | 1 | 0 | 1 | 1 | 1 | 39  | 7.5 | 15  |
| 0 | 1 | 0 | 1 | 1 | 1 | 40  | 7.5 | 15  |
| 0 | 1 | 0 | 1 | 1 | 1 | 41  | 7.5 | 15  |

|   |   |   |   |   |   |    |     |    |
|---|---|---|---|---|---|----|-----|----|
| 0 | 1 | 0 | 1 | 1 | 1 | 42 | 7.5 | 15 |
| 0 | 1 | 0 | 1 | 1 | 1 | 43 | 7.5 | 15 |
| 0 | 1 | 0 | 1 | 1 | 1 | 44 | 7.5 | 15 |
| 0 | 1 | 0 | 1 | 1 | 1 | 45 | 7.5 | 15 |
| 0 | 1 | 0 | 1 | 1 | 1 | 46 | 7.5 | 75 |
| 0 | 1 | 0 | 1 | 1 | 1 | 47 | 7.5 | 75 |
| 0 | 1 | 0 | 1 | 1 | 1 | 48 | 7.5 | 75 |
| 0 | 1 | 0 | 1 | 1 | 1 | 49 | 7.5 | 75 |
| 0 | 1 | 0 | 1 | 1 | 1 | 50 | 7.5 | 75 |
| 0 | 1 | 0 | 1 | 1 | 1 | 51 | 7.5 | 75 |
| 0 | 1 | 0 | 1 | 1 | 1 | 52 | 7.5 | 75 |
| 0 | 1 | 0 | 1 | 1 | 1 | 53 | 7.5 | 75 |
| 0 | 1 | 0 | 1 | 1 | 1 | 54 | 7.5 | 75 |
| 0 | 1 | 0 | 1 | 1 | 1 | 55 | 7.5 | 75 |
| 0 | 1 | 0 | 1 | 1 | 1 | 56 | 7.5 | 75 |
| 0 | 1 | 0 | 1 | 1 | 1 | 57 | 7.5 | 75 |
| 0 | 1 | 0 | 1 | 1 | 1 | 58 | 7.5 | 75 |
| 0 | 1 | 0 | 1 | 1 | 1 | 59 | 7.5 | 75 |
| 0 | 1 | 0 | 1 | 1 | 1 | 60 | 7.5 | 75 |
| 0 | 1 | 0 | 1 | 1 | 1 | 61 | 7.5 | 75 |
| 0 | 1 | 0 | 1 | 1 | 1 | 62 | 7.5 | 75 |
| 0 | 1 | 0 | 1 | 1 | 1 | 63 | 7.5 | 75 |
| 0 | 1 | 0 | 1 | 1 | 1 | 64 | 7.5 | 75 |
| 0 | 1 | 0 | 1 | 1 | 1 | 65 | 7.5 | 75 |
| 0 | 1 | 0 | 1 | 1 | 1 | 66 | 7.5 | 75 |
| 0 | 1 | 0 | 1 | 1 | 1 | 67 | 7.5 | 75 |
| 0 | 1 | 0 | 1 | 1 | 1 | 68 | 7.5 | 75 |
| 0 | 1 | 0 | 1 | 1 | 1 | 69 | 7.5 | 75 |
| 0 | 1 | 0 | 1 | 1 | 1 | 70 | 7.5 | 75 |
| 0 | 1 | 0 | 1 | 1 | 1 | 71 | 7.5 | 75 |
| 0 | 1 | 0 | 1 | 1 | 1 | 72 | 7.5 | 75 |
| 0 | 1 | 0 | 1 | 1 | 1 | 73 | 7.5 | 75 |
| 0 | 1 | 0 | 1 | 1 | 1 | 74 | 7.5 | 75 |
| 0 | 1 | 0 | 1 | 1 | 1 | 75 | 7.5 | 75 |
| 0 | 1 | 0 | 1 | 1 | 1 | 76 | 7.5 | 75 |
| 0 | 1 | 0 | 1 | 1 | 1 | 77 | 7.5 | 75 |
| 0 | 1 | 0 | 1 | 1 | 1 | 78 | 7.5 | 75 |
| 0 | 1 | 0 | 1 | 1 | 1 | 79 | 7.5 | 75 |
| 0 | 1 | 0 | 1 | 1 | 1 | 80 | 7.5 | 75 |
| 0 | 1 | 0 | 1 | 1 | 1 | 81 | 7.5 | 75 |
| 0 | 1 | 0 | 1 | 1 | 1 | 82 | 7.5 | 75 |
| 0 | 1 | 0 | 1 | 1 | 1 | 83 | 7.5 | 75 |
| 0 | 1 | 0 | 1 | 1 | 1 | 84 | 7.5 | 75 |
| 0 | 1 | 0 | 1 | 1 | 1 | 85 | 7.5 | 75 |
| 0 | 1 | 0 | 1 | 1 | 1 | 86 | 7.5 | 75 |
| 0 | 1 | 0 | 1 | 1 | 1 | 87 | 7.5 | 75 |
| 0 | 1 | 0 | 1 | 1 | 1 | 88 | 7.5 | 75 |

|   |   |   |   |   |   |     |     |    |
|---|---|---|---|---|---|-----|-----|----|
| 0 | 1 | 0 | 1 | 1 | 1 | 89  | 7.5 | 75 |
| 0 | 1 | 0 | 1 | 1 | 1 | 90  | 7.5 | 75 |
| 0 | 1 | 0 | 1 | 1 | 1 | 91  | 7.5 | 75 |
| 0 | 1 | 0 | 1 | 1 | 1 | 92  | 7.5 | 75 |
| 0 | 1 | 0 | 1 | 1 | 1 | 93  | 7.5 | 75 |
| 0 | 1 | 0 | 1 | 1 | 1 | 94  | 7.5 | 75 |
| 0 | 1 | 0 | 1 | 1 | 1 | 95  | 7.5 | 75 |
| 0 | 1 | 0 | 1 | 1 | 1 | 96  | 7.5 | 75 |
| 0 | 1 | 0 | 1 | 1 | 1 | 97  | 7.5 | 75 |
| 0 | 1 | 0 | 1 | 1 | 1 | 98  | 7.5 | 75 |
| 0 | 1 | 0 | 1 | 1 | 1 | 99  | 7.5 | 75 |
| 0 | 1 | 0 | 1 | 1 | 1 | 100 | 7.5 | 75 |
| 0 | 1 | 0 | 1 | 1 | 1 | 101 | 7.5 | 75 |
| 0 | 1 | 0 | 1 | 1 | 1 | 102 | 7.5 | 75 |
| 0 | 1 | 0 | 1 | 1 | 1 | 103 | 7.5 | 75 |
| 0 | 1 | 0 | 1 | 1 | 1 | 104 | 7.5 | 75 |
| 0 | 1 | 0 | 1 | 1 | 1 | 105 | 7.5 | 75 |
| 0 | 1 | 0 | 1 | 1 | 1 | 106 | 7.5 | 75 |
| 0 | 1 | 0 | 1 | 1 | 1 | 107 | 7.5 | 75 |
| 0 | 1 | 0 | 1 | 1 | 1 | 108 | 7.5 | 75 |
| 0 | 1 | 0 | 1 | 1 | 1 | 109 | 7.5 | 75 |
| 0 | 1 | 0 | 1 | 1 | 1 | 110 | 7.5 | 75 |
| 0 | 1 | 0 | 1 | 1 | 1 | 111 | 7.5 | 75 |
| 0 | 1 | 0 | 1 | 1 | 1 | 112 | 7.5 | 75 |
| 0 | 1 | 0 | 1 | 1 | 1 | 113 | 7.5 | 75 |
| 0 | 1 | 0 | 1 | 1 | 1 | 114 | 7.5 | 75 |
| 0 | 1 | 0 | 1 | 1 | 1 | 115 | 7.5 | 75 |
| 0 | 1 | 0 | 1 | 1 | 1 | 116 | 7.5 | 75 |
| 0 | 1 | 0 | 1 | 1 | 1 | 117 | 7.5 | 75 |
| 0 | 1 | 0 | 1 | 1 | 1 | 118 | 7.5 | 75 |
| 0 | 1 | 0 | 1 | 1 | 1 | 119 | 7.5 | 75 |
| 0 | 1 | 0 | 1 | 1 | 1 | 120 | 7.5 | 75 |
| 0 | 1 | 0 | 1 | 1 | 1 | 121 | 7.5 | 75 |
| 0 | 1 | 0 | 1 | 1 | 1 | 122 | 7.5 | 75 |
| 0 | 1 | 0 | 1 | 1 | 1 | 123 | 7.5 | 75 |
| 0 | 1 | 0 | 1 | 1 | 1 | 124 | 7.5 | 75 |
| 0 | 1 | 0 | 1 | 1 | 1 | 125 | 7.5 | 75 |
| 0 | 1 | 0 | 1 | 1 | 1 | 126 | 7.5 | 75 |
| 0 | 1 | 0 | 1 | 1 | 1 | 127 | 7.5 | 75 |
| 0 | 1 | 0 | 1 | 1 | 1 | 128 | 7.5 | 75 |
| 0 | 1 | 0 | 1 | 1 | 1 | 129 | 7.5 | 75 |
| 0 | 1 | 0 | 1 | 1 | 1 | 130 | 7.5 | 75 |
| 0 | 1 | 0 | 1 | 1 | 1 | 131 | 7.5 | 75 |
| 0 | 1 | 0 | 1 | 1 | 1 | 132 | 7.5 | 75 |
| 0 | 1 | 0 | 1 | 1 | 1 | 133 | 7.5 | 75 |
| 0 | 1 | 0 | 1 | 1 | 1 | 134 | 7.5 | 75 |
| 0 | 1 | 0 | 1 | 1 | 1 | 135 | 7.5 | 75 |

|   |   |   |   |   |   |     |     |    |
|---|---|---|---|---|---|-----|-----|----|
| 0 | 1 | 0 | 1 | 1 | 1 | 136 | 7.5 | 75 |
| 0 | 1 | 0 | 1 | 1 | 1 | 137 | 7.5 | 75 |
| 0 | 1 | 0 | 1 | 1 | 1 | 138 | 7.5 | 75 |
| 0 | 1 | 0 | 1 | 1 | 1 | 139 | 7.5 | 75 |
| 0 | 1 | 0 | 1 | 1 | 1 | 140 | 7.5 | 75 |
| 0 | 1 | 0 | 1 | 1 | 1 | 141 | 7.5 | 75 |
| 0 | 1 | 0 | 1 | 1 | 1 | 142 | 7.5 | 75 |
| 0 | 1 | 0 | 1 | 1 | 1 | 143 | 7.5 | 75 |
| 0 | 1 | 0 | 1 | 1 | 1 | 144 | 7.5 | 75 |
| 0 | 1 | 0 | 1 | 1 | 1 | 145 | 7.5 | 75 |
| 0 | 1 | 0 | 1 | 1 | 1 | 146 | 7.5 | 75 |
| 0 | 1 | 0 | 1 | 1 | 1 | 147 | 7.5 | 75 |
| 0 | 1 | 0 | 1 | 1 | 1 | 148 | 7.5 | 75 |
| 0 | 1 | 0 | 1 | 1 | 1 | 149 | 7.5 | 75 |
| 0 | 1 | 0 | 1 | 1 | 1 | 150 | 7.5 | 75 |
| 0 | 1 | 0 | 1 | 1 | 1 | 151 | 7.5 | 75 |
| 0 | 1 | 0 | 1 | 1 | 1 | 152 | 7.5 | 75 |
| 0 | 1 | 0 | 1 | 1 | 1 | 153 | 7.5 | 75 |
| 0 | 1 | 0 | 1 | 1 | 1 | 154 | 7.5 | 75 |
| 0 | 1 | 0 | 1 | 1 | 1 | 155 | 7.5 | 75 |
| 0 | 1 | 0 | 1 | 1 | 1 | 156 | 7.5 | 75 |
| 0 | 1 | 0 | 1 | 1 | 1 | 157 | 7.5 | 75 |
| 0 | 1 | 0 | 1 | 1 | 1 | 158 | 7.5 | 75 |
| 0 | 1 | 0 | 1 | 1 | 1 | 159 | 7.5 | 75 |
| 0 | 1 | 0 | 1 | 1 | 1 | 160 | 7.5 | 75 |
| 0 | 1 | 0 | 1 | 1 | 1 | 161 | 7.5 | 75 |
| 0 | 1 | 0 | 1 | 1 | 1 | 162 | 7.5 | 75 |
| 0 | 1 | 0 | 1 | 1 | 1 | 163 | 7.5 | 75 |
| 0 | 1 | 0 | 1 | 1 | 1 | 164 | 7.5 | 75 |
| 0 | 1 | 0 | 1 | 1 | 1 | 165 | 7.5 | 75 |
| 0 | 1 | 0 | 1 | 1 | 1 | 166 | 7.5 | 75 |
| 0 | 1 | 0 | 1 | 1 | 1 | 167 | 7.5 | 75 |
| 0 | 1 | 0 | 1 | 1 | 1 | 168 | 7.5 | 75 |
| 0 | 1 | 0 | 1 | 1 | 1 | 169 | 7.5 | 75 |
| 0 | 1 | 0 | 1 | 1 | 1 | 170 | 7.5 | 75 |
| 0 | 1 | 0 | 1 | 1 | 1 | 171 | 7.5 | 75 |
| 0 | 1 | 0 | 1 | 1 | 1 | 172 | 7.5 | 75 |
| 0 | 1 | 0 | 1 | 1 | 1 | 173 | 7.5 | 75 |
| 0 | 1 | 0 | 1 | 1 | 1 | 174 | 7.5 | 75 |
| 0 | 1 | 0 | 1 | 1 | 1 | 175 | 7.5 | 75 |
| 0 | 1 | 0 | 1 | 1 | 1 | 176 | 7.5 | 75 |
| 0 | 1 | 0 | 1 | 1 | 1 | 177 | 7.5 | 75 |
| 0 | 1 | 0 | 1 | 1 | 1 | 178 | 7.5 | 75 |
| 0 | 1 | 0 | 1 | 1 | 1 | 179 | 7.5 | 75 |
| 0 | 1 | 0 | 1 | 1 | 1 | 180 | 7.5 | 75 |
| 0 | 0 | 1 | 1 | 1 | 1 | 0   | 7.5 | 0  |

|   |   |   |   |   |   |    |     |    |
|---|---|---|---|---|---|----|-----|----|
| 0 | 0 | 1 | 1 | 1 | 1 | 1  | 7.5 | 15 |
| 0 | 0 | 1 | 1 | 1 | 1 | 2  | 7.5 | 15 |
| 0 | 0 | 1 | 1 | 1 | 1 | 3  | 7.5 | 15 |
| 0 | 0 | 1 | 1 | 1 | 1 | 4  | 7.5 | 15 |
| 0 | 0 | 1 | 1 | 1 | 1 | 5  | 7.5 | 15 |
| 0 | 0 | 1 | 1 | 1 | 1 | 6  | 7.5 | 15 |
| 0 | 0 | 1 | 1 | 1 | 1 | 7  | 7.5 | 15 |
| 0 | 0 | 1 | 1 | 1 | 1 | 8  | 7.5 | 15 |
| 0 | 0 | 1 | 1 | 1 | 1 | 9  | 7.5 | 15 |
| 0 | 0 | 1 | 1 | 1 | 1 | 10 | 7.5 | 15 |
| 0 | 0 | 1 | 1 | 1 | 1 | 11 | 7.5 | 15 |
| 0 | 0 | 1 | 1 | 1 | 1 | 12 | 7.5 | 15 |
| 0 | 0 | 1 | 1 | 1 | 1 | 13 | 7.5 | 15 |
| 0 | 0 | 1 | 1 | 1 | 1 | 14 | 7.5 | 15 |
| 0 | 0 | 1 | 1 | 1 | 1 | 15 | 7.5 | 15 |
| 0 | 0 | 1 | 1 | 1 | 1 | 16 | 7.5 | 15 |
| 0 | 0 | 1 | 1 | 1 | 1 | 17 | 7.5 | 15 |
| 0 | 0 | 1 | 1 | 1 | 1 | 18 | 7.5 | 15 |
| 0 | 0 | 1 | 1 | 1 | 1 | 19 | 7.5 | 15 |
| 0 | 0 | 1 | 1 | 1 | 1 | 20 | 7.5 | 15 |
| 0 | 0 | 1 | 1 | 1 | 1 | 21 | 7.5 | 15 |
| 0 | 0 | 1 | 1 | 1 | 1 | 22 | 7.5 | 15 |
| 0 | 0 | 1 | 1 | 1 | 1 | 23 | 7.5 | 15 |
| 0 | 0 | 1 | 1 | 1 | 1 | 24 | 7.5 | 15 |
| 0 | 0 | 1 | 1 | 1 | 1 | 25 | 7.5 | 15 |
| 0 | 0 | 1 | 1 | 1 | 1 | 26 | 7.5 | 15 |
| 0 | 0 | 1 | 1 | 1 | 1 | 27 | 7.5 | 15 |
| 0 | 0 | 1 | 1 | 1 | 1 | 28 | 7.5 | 15 |
| 0 | 0 | 1 | 1 | 1 | 1 | 29 | 7.5 | 15 |
| 0 | 0 | 1 | 1 | 1 | 1 | 30 | 7.5 | 30 |
| 0 | 0 | 1 | 1 | 1 | 1 | 31 | 7.5 | 45 |
| 0 | 0 | 1 | 1 | 1 | 1 | 32 | 7.5 | 45 |
| 0 | 0 | 1 | 1 | 1 | 1 | 33 | 7.5 | 45 |
| 0 | 0 | 1 | 1 | 1 | 1 | 34 | 7.5 | 45 |
| 0 | 0 | 1 | 1 | 1 | 1 | 35 | 7.5 | 45 |
| 0 | 0 | 1 | 1 | 1 | 1 | 36 | 7.5 | 45 |
| 0 | 0 | 1 | 1 | 1 | 1 | 37 | 7.5 | 45 |
| 0 | 0 | 1 | 1 | 1 | 1 | 38 | 7.5 | 45 |
| 0 | 0 | 1 | 1 | 1 | 1 | 39 | 7.5 | 45 |
| 0 | 0 | 1 | 1 | 1 | 1 | 40 | 7.5 | 45 |
| 0 | 0 | 1 | 1 | 1 | 1 | 41 | 7.5 | 45 |
| 0 | 0 | 1 | 1 | 1 | 1 | 42 | 7.5 | 45 |
| 0 | 0 | 1 | 1 | 1 | 1 | 43 | 7.5 | 45 |
| 0 | 0 | 1 | 1 | 1 | 1 | 44 | 7.5 | 45 |
| 0 | 0 | 1 | 1 | 1 | 1 | 45 | 7.5 | 45 |
| 0 | 0 | 1 | 1 | 1 | 1 | 46 | 7.5 | 45 |

|   |   |   |   |   |   |    |     |    |
|---|---|---|---|---|---|----|-----|----|
| 0 | 0 | 1 | 1 | 1 | 1 | 47 | 7.5 | 45 |
| 0 | 0 | 1 | 1 | 1 | 1 | 48 | 7.5 | 45 |
| 0 | 0 | 1 | 1 | 1 | 1 | 49 | 7.5 | 45 |
| 0 | 0 | 1 | 1 | 1 | 1 | 50 | 7.5 | 45 |
| 0 | 0 | 1 | 1 | 1 | 1 | 51 | 7.5 | 45 |
| 0 | 0 | 1 | 1 | 1 | 1 | 52 | 7.5 | 45 |
| 0 | 0 | 1 | 1 | 1 | 1 | 53 | 7.5 | 45 |
| 0 | 0 | 1 | 1 | 1 | 1 | 54 | 7.5 | 45 |
| 0 | 0 | 1 | 1 | 1 | 1 | 55 | 7.5 | 45 |
| 0 | 0 | 1 | 1 | 1 | 1 | 56 | 7.5 | 45 |
| 0 | 0 | 1 | 1 | 1 | 1 | 57 | 7.5 | 45 |
| 0 | 0 | 1 | 1 | 1 | 1 | 58 | 7.5 | 45 |
| 0 | 0 | 1 | 1 | 1 | 1 | 59 | 7.5 | 45 |
| 0 | 0 | 1 | 1 | 1 | 1 | 60 | 7.5 | 45 |
| 0 | 0 | 1 | 1 | 1 | 1 | 61 | 7.5 | 45 |
| 0 | 0 | 1 | 1 | 1 | 1 | 62 | 7.5 | 45 |
| 0 | 0 | 1 | 1 | 1 | 1 | 63 | 7.5 | 45 |
| 0 | 0 | 1 | 1 | 1 | 1 | 64 | 7.5 | 45 |
| 0 | 0 | 1 | 1 | 1 | 1 | 65 | 7.5 | 45 |
| 0 | 0 | 1 | 1 | 1 | 1 | 66 | 7.5 | 45 |
| 0 | 0 | 1 | 1 | 1 | 1 | 67 | 7.5 | 45 |
| 0 | 0 | 1 | 1 | 1 | 1 | 68 | 7.5 | 45 |
| 0 | 0 | 1 | 1 | 1 | 1 | 69 | 7.5 | 45 |
| 0 | 0 | 1 | 1 | 1 | 1 | 70 | 7.5 | 45 |
| 0 | 0 | 1 | 1 | 1 | 1 | 71 | 7.5 | 45 |
| 0 | 0 | 1 | 1 | 1 | 1 | 72 | 7.5 | 45 |
| 0 | 0 | 1 | 1 | 1 | 1 | 73 | 7.5 | 45 |
| 0 | 0 | 1 | 1 | 1 | 1 | 74 | 7.5 | 45 |
| 0 | 0 | 1 | 1 | 1 | 1 | 75 | 7.5 | 45 |
| 0 | 0 | 1 | 1 | 1 | 1 | 76 | 7.5 | 45 |
| 0 | 0 | 1 | 1 | 1 | 1 | 77 | 7.5 | 45 |
| 0 | 0 | 1 | 1 | 1 | 1 | 78 | 7.5 | 45 |
| 0 | 0 | 1 | 1 | 1 | 1 | 79 | 7.5 | 45 |
| 0 | 0 | 1 | 1 | 1 | 1 | 80 | 7.5 | 45 |
| 0 | 0 | 1 | 1 | 1 | 1 | 81 | 7.5 | 45 |
| 0 | 0 | 1 | 1 | 1 | 1 | 82 | 7.5 | 45 |
| 0 | 0 | 1 | 1 | 1 | 1 | 83 | 7.5 | 45 |
| 0 | 0 | 1 | 1 | 1 | 1 | 84 | 7.5 | 45 |
| 0 | 0 | 1 | 1 | 1 | 1 | 85 | 7.5 | 45 |
| 0 | 0 | 1 | 1 | 1 | 1 | 86 | 7.5 | 45 |
| 0 | 0 | 1 | 1 | 1 | 1 | 87 | 7.5 | 45 |
| 0 | 0 | 1 | 1 | 1 | 1 | 88 | 7.5 | 45 |
| 0 | 0 | 1 | 1 | 1 | 1 | 89 | 7.5 | 45 |
| 0 | 0 | 1 | 1 | 1 | 1 | 90 | 7.5 | 45 |
| 0 | 0 | 1 | 1 | 1 | 1 | 91 | 7.5 | 45 |
| 0 | 0 | 1 | 1 | 1 | 1 | 92 | 7.5 | 45 |

|   |   |   |   |   |   |     |     |    |
|---|---|---|---|---|---|-----|-----|----|
| 0 | 0 | 1 | 1 | 1 | 1 | 93  | 7.5 | 45 |
| 0 | 0 | 1 | 1 | 1 | 1 | 94  | 7.5 | 45 |
| 0 | 0 | 1 | 1 | 1 | 1 | 95  | 7.5 | 45 |
| 0 | 0 | 1 | 1 | 1 | 1 | 96  | 7.5 | 45 |
| 0 | 0 | 1 | 1 | 1 | 1 | 97  | 7.5 | 45 |
| 0 | 0 | 1 | 1 | 1 | 1 | 98  | 7.5 | 45 |
| 0 | 0 | 1 | 1 | 1 | 1 | 99  | 7.5 | 45 |
| 0 | 0 | 1 | 1 | 1 | 1 | 100 | 7.5 | 45 |
| 0 | 0 | 1 | 1 | 1 | 1 | 101 | 7.5 | 45 |
| 0 | 0 | 1 | 1 | 1 | 1 | 102 | 7.5 | 45 |
| 0 | 0 | 1 | 1 | 1 | 1 | 103 | 7.5 | 45 |
| 0 | 0 | 1 | 1 | 1 | 1 | 104 | 7.5 | 45 |
| 0 | 0 | 1 | 1 | 1 | 1 | 105 | 7.5 | 45 |
| 0 | 0 | 1 | 1 | 1 | 1 | 106 | 7.5 | 45 |
| 0 | 0 | 1 | 1 | 1 | 1 | 107 | 7.5 | 45 |
| 0 | 0 | 1 | 1 | 1 | 1 | 108 | 7.5 | 45 |
| 0 | 0 | 1 | 1 | 1 | 1 | 109 | 7.5 | 45 |
| 0 | 0 | 1 | 1 | 1 | 1 | 110 | 7.5 | 45 |
| 0 | 0 | 1 | 1 | 1 | 1 | 111 | 7.5 | 45 |
| 0 | 0 | 1 | 1 | 1 | 1 | 112 | 7.5 | 45 |
| 0 | 0 | 1 | 1 | 1 | 1 | 113 | 7.5 | 45 |
| 0 | 0 | 1 | 1 | 1 | 1 | 114 | 7.5 | 45 |
| 0 | 0 | 1 | 1 | 1 | 1 | 115 | 7.5 | 45 |
| 0 | 0 | 1 | 1 | 1 | 1 | 116 | 7.5 | 45 |
| 0 | 0 | 1 | 1 | 1 | 1 | 117 | 7.5 | 45 |
| 0 | 0 | 1 | 1 | 1 | 1 | 118 | 7.5 | 45 |
| 0 | 0 | 1 | 1 | 1 | 1 | 119 | 7.5 | 45 |
| 0 | 0 | 1 | 1 | 1 | 1 | 120 | 7.5 | 45 |
| 0 | 0 | 1 | 1 | 1 | 1 | 121 | 7.5 | 45 |
| 0 | 0 | 1 | 1 | 1 | 1 | 122 | 7.5 | 45 |
| 0 | 0 | 1 | 1 | 1 | 1 | 123 | 7.5 | 45 |
| 0 | 0 | 1 | 1 | 1 | 1 | 124 | 7.5 | 45 |
| 0 | 0 | 1 | 1 | 1 | 1 | 125 | 7.5 | 45 |
| 0 | 0 | 1 | 1 | 1 | 1 | 126 | 7.5 | 45 |
| 0 | 0 | 1 | 1 | 1 | 1 | 127 | 7.5 | 45 |
| 0 | 0 | 1 | 1 | 1 | 1 | 128 | 7.5 | 45 |
| 0 | 0 | 1 | 1 | 1 | 1 | 129 | 7.5 | 45 |
| 0 | 0 | 1 | 1 | 1 | 1 | 130 | 7.5 | 45 |
| 0 | 0 | 1 | 1 | 1 | 1 | 131 | 7.5 | 45 |
| 0 | 0 | 1 | 1 | 1 | 1 | 132 | 7.5 | 45 |
| 0 | 0 | 1 | 1 | 1 | 1 | 133 | 7.5 | 45 |
| 0 | 0 | 1 | 1 | 1 | 1 | 134 | 7.5 | 45 |
| 0 | 0 | 1 | 1 | 1 | 1 | 135 | 7.5 | 45 |
| 0 | 0 | 1 | 1 | 1 | 1 | 136 | 7.5 | 45 |
| 0 | 0 | 1 | 1 | 1 | 1 | 137 | 7.5 | 45 |
| 0 | 0 | 1 | 1 | 1 | 1 | 138 | 7.5 | 45 |

|   |   |   |   |   |   |     |     |    |
|---|---|---|---|---|---|-----|-----|----|
| 0 | 0 | 1 | 1 | 1 | 1 | 139 | 7.5 | 45 |
| 0 | 0 | 1 | 1 | 1 | 1 | 140 | 7.5 | 45 |
| 0 | 0 | 1 | 1 | 1 | 1 | 141 | 7.5 | 45 |
| 0 | 0 | 1 | 1 | 1 | 1 | 142 | 7.5 | 45 |
| 0 | 0 | 1 | 1 | 1 | 1 | 143 | 7.5 | 45 |
| 0 | 0 | 1 | 1 | 1 | 1 | 144 | 7.5 | 45 |
| 0 | 0 | 1 | 1 | 1 | 1 | 145 | 7.5 | 45 |
| 0 | 0 | 1 | 1 | 1 | 1 | 146 | 7.5 | 45 |
| 0 | 0 | 1 | 1 | 1 | 1 | 147 | 7.5 | 45 |
| 0 | 0 | 1 | 1 | 1 | 1 | 148 | 7.5 | 45 |
| 0 | 0 | 1 | 1 | 1 | 1 | 149 | 7.5 | 45 |
| 0 | 0 | 1 | 1 | 1 | 1 | 150 | 7.5 | 45 |
| 0 | 0 | 1 | 1 | 1 | 1 | 151 | 7.5 | 45 |
| 0 | 0 | 1 | 1 | 1 | 1 | 152 | 7.5 | 45 |
| 0 | 0 | 1 | 1 | 1 | 1 | 153 | 7.5 | 45 |
| 0 | 0 | 1 | 1 | 1 | 1 | 154 | 7.5 | 45 |
| 0 | 0 | 1 | 1 | 1 | 1 | 155 | 7.5 | 45 |
| 0 | 0 | 1 | 1 | 1 | 1 | 156 | 7.5 | 45 |
| 0 | 0 | 1 | 1 | 1 | 1 | 157 | 7.5 | 45 |
| 0 | 0 | 1 | 1 | 1 | 1 | 158 | 7.5 | 45 |
| 0 | 0 | 1 | 1 | 1 | 1 | 159 | 7.5 | 45 |
| 0 | 0 | 1 | 1 | 1 | 1 | 160 | 7.5 | 45 |
| 0 | 0 | 1 | 1 | 1 | 1 | 161 | 7.5 | 45 |
| 0 | 0 | 1 | 1 | 1 | 1 | 162 | 7.5 | 45 |
| 0 | 0 | 1 | 1 | 1 | 1 | 163 | 7.5 | 45 |
| 0 | 0 | 1 | 1 | 1 | 1 | 164 | 7.5 | 45 |
| 0 | 0 | 1 | 1 | 1 | 1 | 165 | 7.5 | 45 |
| 0 | 0 | 1 | 1 | 1 | 1 | 166 | 7.5 | 45 |
| 0 | 0 | 1 | 1 | 1 | 1 | 167 | 7.5 | 45 |
| 0 | 0 | 1 | 1 | 1 | 1 | 168 | 7.5 | 45 |
| 0 | 0 | 1 | 1 | 1 | 1 | 169 | 7.5 | 45 |
| 0 | 0 | 1 | 1 | 1 | 1 | 170 | 7.5 | 45 |
| 0 | 0 | 1 | 1 | 1 | 1 | 171 | 7.5 | 45 |
| 0 | 0 | 1 | 1 | 1 | 1 | 172 | 7.5 | 45 |
| 0 | 0 | 1 | 1 | 1 | 1 | 173 | 7.5 | 45 |
| 0 | 0 | 1 | 1 | 1 | 1 | 174 | 7.5 | 45 |
| 0 | 0 | 1 | 1 | 1 | 1 | 175 | 7.5 | 45 |
| 0 | 0 | 1 | 1 | 1 | 1 | 176 | 7.5 | 45 |
| 0 | 0 | 1 | 1 | 1 | 1 | 177 | 7.5 | 45 |
| 0 | 0 | 1 | 1 | 1 | 1 | 178 | 7.5 | 45 |
| 0 | 0 | 1 | 1 | 1 | 1 | 179 | 7.5 | 45 |
| 0 | 0 | 1 | 1 | 1 | 1 | 180 | 7.5 | 45 |
| 0 | 1 | 1 | 1 | 1 | 1 | 0   | 7.5 | 0  |
| 0 | 1 | 1 | 1 | 1 | 1 | 1   | 7.5 | 15 |
| 0 | 1 | 1 | 1 | 1 | 1 | 2   | 7.5 | 15 |
| 0 | 1 | 1 | 1 | 1 | 1 | 3   | 7.5 | 15 |

|   |   |   |   |   |   |    |     |    |
|---|---|---|---|---|---|----|-----|----|
| 0 | 1 | 1 | 1 | 1 | 1 | 4  | 7.5 | 15 |
| 0 | 1 | 1 | 1 | 1 | 1 | 5  | 7.5 | 15 |
| 0 | 1 | 1 | 1 | 1 | 1 | 6  | 7.5 | 15 |
| 0 | 1 | 1 | 1 | 1 | 1 | 7  | 7.5 | 15 |
| 0 | 1 | 1 | 1 | 1 | 1 | 8  | 7.5 | 15 |
| 0 | 1 | 1 | 1 | 1 | 1 | 9  | 7.5 | 15 |
| 0 | 1 | 1 | 1 | 1 | 1 | 10 | 7.5 | 15 |
| 0 | 1 | 1 | 1 | 1 | 1 | 11 | 7.5 | 15 |
| 0 | 1 | 1 | 1 | 1 | 1 | 12 | 7.5 | 15 |
| 0 | 1 | 1 | 1 | 1 | 1 | 13 | 7.5 | 15 |
| 0 | 1 | 1 | 1 | 1 | 1 | 14 | 7.5 | 15 |
| 0 | 1 | 1 | 1 | 1 | 1 | 15 | 7.5 | 15 |
| 0 | 1 | 1 | 1 | 1 | 1 | 16 | 7.5 | 15 |
| 0 | 1 | 1 | 1 | 1 | 1 | 17 | 7.5 | 15 |
| 0 | 1 | 1 | 1 | 1 | 1 | 18 | 7.5 | 15 |
| 0 | 1 | 1 | 1 | 1 | 1 | 19 | 7.5 | 15 |
| 0 | 1 | 1 | 1 | 1 | 1 | 20 | 7.5 | 15 |
| 0 | 1 | 1 | 1 | 1 | 1 | 21 | 7.5 | 15 |
| 0 | 1 | 1 | 1 | 1 | 1 | 22 | 7.5 | 15 |
| 0 | 1 | 1 | 1 | 1 | 1 | 23 | 7.5 | 15 |
| 0 | 1 | 1 | 1 | 1 | 1 | 24 | 7.5 | 15 |
| 0 | 1 | 1 | 1 | 1 | 1 | 25 | 7.5 | 15 |
| 0 | 1 | 1 | 1 | 1 | 1 | 26 | 7.5 | 15 |
| 0 | 1 | 1 | 1 | 1 | 1 | 27 | 7.5 | 15 |
| 0 | 1 | 1 | 1 | 1 | 1 | 28 | 7.5 | 15 |
| 0 | 1 | 1 | 1 | 1 | 1 | 29 | 7.5 | 15 |
| 0 | 1 | 1 | 1 | 1 | 1 | 30 | 7.5 | 15 |
| 0 | 1 | 1 | 1 | 1 | 1 | 31 | 7.5 | 15 |
| 0 | 1 | 1 | 1 | 1 | 1 | 32 | 7.5 | 15 |
| 0 | 1 | 1 | 1 | 1 | 1 | 33 | 7.5 | 15 |
| 0 | 1 | 1 | 1 | 1 | 1 | 34 | 7.5 | 15 |
| 0 | 1 | 1 | 1 | 1 | 1 | 35 | 7.5 | 15 |
| 0 | 1 | 1 | 1 | 1 | 1 | 36 | 7.5 | 15 |
| 0 | 1 | 1 | 1 | 1 | 1 | 37 | 7.5 | 15 |
| 0 | 1 | 1 | 1 | 1 | 1 | 38 | 7.5 | 15 |
| 0 | 1 | 1 | 1 | 1 | 1 | 39 | 7.5 | 15 |
| 0 | 1 | 1 | 1 | 1 | 1 | 40 | 7.5 | 15 |
| 0 | 1 | 1 | 1 | 1 | 1 | 41 | 7.5 | 15 |
| 0 | 1 | 1 | 1 | 1 | 1 | 42 | 7.5 | 15 |
| 0 | 1 | 1 | 1 | 1 | 1 | 43 | 7.5 | 15 |
| 0 | 1 | 1 | 1 | 1 | 1 | 44 | 7.5 | 15 |
| 0 | 1 | 1 | 1 | 1 | 1 | 45 | 7.5 | 15 |
| 0 | 1 | 1 | 1 | 1 | 1 | 46 | 7.5 | 15 |
| 0 | 1 | 1 | 1 | 1 | 1 | 47 | 7.5 | 15 |
| 0 | 1 | 1 | 1 | 1 | 1 | 48 | 7.5 | 15 |
| 0 | 1 | 1 | 1 | 1 | 1 | 49 | 7.5 | 15 |
| 0 | 1 | 1 | 1 | 1 | 1 | 50 | 7.5 | 15 |

|   |   |   |   |   |   |    |     |    |
|---|---|---|---|---|---|----|-----|----|
| 0 | 1 | 1 | 1 | 1 | 1 | 51 | 7.5 | 15 |
| 0 | 1 | 1 | 1 | 1 | 1 | 52 | 7.5 | 15 |
| 0 | 1 | 1 | 1 | 1 | 1 | 53 | 7.5 | 15 |
| 0 | 1 | 1 | 1 | 1 | 1 | 54 | 7.5 | 15 |
| 0 | 1 | 1 | 1 | 1 | 1 | 55 | 7.5 | 15 |
| 0 | 1 | 1 | 1 | 1 | 1 | 56 | 7.5 | 15 |
| 0 | 1 | 1 | 1 | 1 | 1 | 57 | 7.5 | 15 |
| 0 | 1 | 1 | 1 | 1 | 1 | 58 | 7.5 | 15 |
| 0 | 1 | 1 | 1 | 1 | 1 | 59 | 7.5 | 15 |
| 0 | 1 | 1 | 1 | 1 | 1 | 60 | 7.5 | 15 |
| 0 | 1 | 1 | 1 | 1 | 1 | 61 | 7.5 | 15 |
| 0 | 1 | 1 | 1 | 1 | 1 | 62 | 7.5 | 15 |
| 0 | 1 | 1 | 1 | 1 | 1 | 63 | 7.5 | 15 |
| 0 | 1 | 1 | 1 | 1 | 1 | 64 | 7.5 | 15 |
| 0 | 1 | 1 | 1 | 1 | 1 | 65 | 7.5 | 15 |
| 0 | 1 | 1 | 1 | 1 | 1 | 66 | 7.5 | 15 |
| 0 | 1 | 1 | 1 | 1 | 1 | 67 | 7.5 | 15 |
| 0 | 1 | 1 | 1 | 1 | 1 | 68 | 7.5 | 15 |
| 0 | 1 | 1 | 1 | 1 | 1 | 69 | 7.5 | 15 |
| 0 | 1 | 1 | 1 | 1 | 1 | 70 | 7.5 | 15 |
| 0 | 1 | 1 | 1 | 1 | 1 | 71 | 7.5 | 15 |
| 0 | 1 | 1 | 1 | 1 | 1 | 72 | 7.5 | 15 |
| 0 | 1 | 1 | 1 | 1 | 1 | 73 | 7.5 | 15 |
| 0 | 1 | 1 | 1 | 1 | 1 | 74 | 7.5 | 15 |
| 0 | 1 | 1 | 1 | 1 | 1 | 75 | 7.5 | 15 |
| 0 | 1 | 1 | 1 | 1 | 1 | 76 | 7.5 | 15 |
| 0 | 1 | 1 | 1 | 1 | 1 | 77 | 7.5 | 15 |
| 0 | 1 | 1 | 1 | 1 | 1 | 78 | 7.5 | 15 |
| 0 | 1 | 1 | 1 | 1 | 1 | 79 | 7.5 | 15 |
| 0 | 1 | 1 | 1 | 1 | 1 | 80 | 7.5 | 15 |
| 0 | 1 | 1 | 1 | 1 | 1 | 81 | 7.5 | 15 |
| 0 | 1 | 1 | 1 | 1 | 1 | 82 | 7.5 | 15 |
| 0 | 1 | 1 | 1 | 1 | 1 | 83 | 7.5 | 15 |
| 0 | 1 | 1 | 1 | 1 | 1 | 84 | 7.5 | 15 |
| 0 | 1 | 1 | 1 | 1 | 1 | 85 | 7.5 | 15 |
| 0 | 1 | 1 | 1 | 1 | 1 | 86 | 7.5 | 15 |
| 0 | 1 | 1 | 1 | 1 | 1 | 87 | 7.5 | 15 |
| 0 | 1 | 1 | 1 | 1 | 1 | 88 | 7.5 | 15 |
| 0 | 1 | 1 | 1 | 1 | 1 | 89 | 7.5 | 15 |
| 0 | 1 | 1 | 1 | 1 | 1 | 90 | 7.5 | 15 |
| 0 | 1 | 1 | 1 | 1 | 1 | 91 | 7.5 | 15 |
| 0 | 1 | 1 | 1 | 1 | 1 | 92 | 7.5 | 15 |
| 0 | 1 | 1 | 1 | 1 | 1 | 93 | 7.5 | 15 |
| 0 | 1 | 1 | 1 | 1 | 1 | 94 | 7.5 | 15 |
| 0 | 1 | 1 | 1 | 1 | 1 | 95 | 7.5 | 15 |
| 0 | 1 | 1 | 1 | 1 | 1 | 96 | 7.5 | 15 |
| 0 | 1 | 1 | 1 | 1 | 1 | 97 | 7.5 | 15 |

|   |   |   |   |   |   |     |     |    |
|---|---|---|---|---|---|-----|-----|----|
| 0 | 1 | 1 | 1 | 1 | 1 | 98  | 7.5 | 15 |
| 0 | 1 | 1 | 1 | 1 | 1 | 99  | 7.5 | 15 |
| 0 | 1 | 1 | 1 | 1 | 1 | 100 | 7.5 | 15 |
| 0 | 1 | 1 | 1 | 1 | 1 | 101 | 7.5 | 15 |
| 0 | 1 | 1 | 1 | 1 | 1 | 102 | 7.5 | 15 |
| 0 | 1 | 1 | 1 | 1 | 1 | 103 | 7.5 | 15 |
| 0 | 1 | 1 | 1 | 1 | 1 | 104 | 7.5 | 15 |
| 0 | 1 | 1 | 1 | 1 | 1 | 105 | 7.5 | 15 |
| 0 | 1 | 1 | 1 | 1 | 1 | 106 | 7.5 | 15 |
| 0 | 1 | 1 | 1 | 1 | 1 | 107 | 7.5 | 15 |
| 0 | 1 | 1 | 1 | 1 | 1 | 108 | 7.5 | 15 |
| 0 | 1 | 1 | 1 | 1 | 1 | 109 | 7.5 | 15 |
| 0 | 1 | 1 | 1 | 1 | 1 | 110 | 7.5 | 15 |
| 0 | 1 | 1 | 1 | 1 | 1 | 111 | 7.5 | 15 |
| 0 | 1 | 1 | 1 | 1 | 1 | 112 | 7.5 | 15 |
| 0 | 1 | 1 | 1 | 1 | 1 | 113 | 7.5 | 15 |
| 0 | 1 | 1 | 1 | 1 | 1 | 114 | 7.5 | 15 |
| 0 | 1 | 1 | 1 | 1 | 1 | 115 | 7.5 | 15 |
| 0 | 1 | 1 | 1 | 1 | 1 | 116 | 7.5 | 15 |
| 0 | 1 | 1 | 1 | 1 | 1 | 117 | 7.5 | 15 |
| 0 | 1 | 1 | 1 | 1 | 1 | 118 | 7.5 | 15 |
| 0 | 1 | 1 | 1 | 1 | 1 | 119 | 7.5 | 15 |
| 0 | 1 | 1 | 1 | 1 | 1 | 120 | 7.5 | 15 |
| 0 | 1 | 1 | 1 | 1 | 1 | 121 | 7.5 | 15 |
| 0 | 1 | 1 | 1 | 1 | 1 | 122 | 7.5 | 15 |
| 0 | 1 | 1 | 1 | 1 | 1 | 123 | 7.5 | 15 |
| 0 | 1 | 1 | 1 | 1 | 1 | 124 | 7.5 | 15 |
| 0 | 1 | 1 | 1 | 1 | 1 | 125 | 7.5 | 15 |
| 0 | 1 | 1 | 1 | 1 | 1 | 126 | 7.5 | 15 |
| 0 | 1 | 1 | 1 | 1 | 1 | 127 | 7.5 | 15 |
| 0 | 1 | 1 | 1 | 1 | 1 | 128 | 7.5 | 15 |
| 0 | 1 | 1 | 1 | 1 | 1 | 129 | 7.5 | 15 |
| 0 | 1 | 1 | 1 | 1 | 1 | 130 | 7.5 | 15 |
| 0 | 1 | 1 | 1 | 1 | 1 | 131 | 7.5 | 15 |
| 0 | 1 | 1 | 1 | 1 | 1 | 132 | 7.5 | 15 |
| 0 | 1 | 1 | 1 | 1 | 1 | 133 | 7.5 | 15 |
| 0 | 1 | 1 | 1 | 1 | 1 | 134 | 7.5 | 15 |
| 0 | 1 | 1 | 1 | 1 | 1 | 135 | 7.5 | 15 |
| 0 | 1 | 1 | 1 | 1 | 1 | 136 | 7.5 | 15 |
| 0 | 1 | 1 | 1 | 1 | 1 | 137 | 7.5 | 15 |
| 0 | 1 | 1 | 1 | 1 | 1 | 138 | 7.5 | 15 |
| 0 | 1 | 1 | 1 | 1 | 1 | 139 | 7.5 | 15 |
| 0 | 1 | 1 | 1 | 1 | 1 | 140 | 7.5 | 15 |
| 0 | 1 | 1 | 1 | 1 | 1 | 141 | 7.5 | 15 |
| 0 | 1 | 1 | 1 | 1 | 1 | 142 | 7.5 | 15 |
| 0 | 1 | 1 | 1 | 1 | 1 | 143 | 7.5 | 15 |
| 0 | 1 | 1 | 1 | 1 | 1 | 144 | 7.5 | 15 |

|   |   |   |   |   |   |     |     |    |
|---|---|---|---|---|---|-----|-----|----|
| 0 | 1 | 1 | 1 | 1 | 1 | 145 | 7.5 | 15 |
| 0 | 1 | 1 | 1 | 1 | 1 | 146 | 7.5 | 15 |
| 0 | 1 | 1 | 1 | 1 | 1 | 147 | 7.5 | 15 |
| 0 | 1 | 1 | 1 | 1 | 1 | 148 | 7.5 | 15 |
| 0 | 1 | 1 | 1 | 1 | 1 | 149 | 7.5 | 15 |
| 0 | 1 | 1 | 1 | 1 | 1 | 150 | 7.5 | 15 |
| 0 | 1 | 1 | 1 | 1 | 1 | 151 | 7.5 | 15 |
| 0 | 1 | 1 | 1 | 1 | 1 | 152 | 7.5 | 15 |
| 0 | 1 | 1 | 1 | 1 | 1 | 153 | 7.5 | 15 |
| 0 | 1 | 1 | 1 | 1 | 1 | 154 | 7.5 | 15 |
| 0 | 1 | 1 | 1 | 1 | 1 | 155 | 7.5 | 15 |
| 0 | 1 | 1 | 1 | 1 | 1 | 156 | 7.5 | 15 |
| 0 | 1 | 1 | 1 | 1 | 1 | 157 | 7.5 | 15 |
| 0 | 1 | 1 | 1 | 1 | 1 | 158 | 7.5 | 15 |
| 0 | 1 | 1 | 1 | 1 | 1 | 159 | 7.5 | 15 |
| 0 | 1 | 1 | 1 | 1 | 1 | 160 | 7.5 | 15 |
| 0 | 1 | 1 | 1 | 1 | 1 | 161 | 7.5 | 15 |
| 0 | 1 | 1 | 1 | 1 | 1 | 162 | 7.5 | 15 |
| 0 | 1 | 1 | 1 | 1 | 1 | 163 | 7.5 | 15 |
| 0 | 1 | 1 | 1 | 1 | 1 | 164 | 7.5 | 15 |
| 0 | 1 | 1 | 1 | 1 | 1 | 165 | 7.5 | 15 |
| 0 | 1 | 1 | 1 | 1 | 1 | 166 | 7.5 | 15 |
| 0 | 1 | 1 | 1 | 1 | 1 | 167 | 7.5 | 15 |
| 0 | 1 | 1 | 1 | 1 | 1 | 168 | 7.5 | 15 |
| 0 | 1 | 1 | 1 | 1 | 1 | 169 | 7.5 | 15 |
| 0 | 1 | 1 | 1 | 1 | 1 | 170 | 7.5 | 15 |
| 0 | 1 | 1 | 1 | 1 | 1 | 171 | 7.5 | 15 |
| 0 | 1 | 1 | 1 | 1 | 1 | 172 | 7.5 | 15 |
| 0 | 1 | 1 | 1 | 1 | 1 | 173 | 7.5 | 15 |
| 0 | 1 | 1 | 1 | 1 | 1 | 174 | 7.5 | 15 |
| 0 | 1 | 1 | 1 | 1 | 1 | 175 | 7.5 | 15 |
| 0 | 1 | 1 | 1 | 1 | 1 | 176 | 7.5 | 15 |
| 0 | 1 | 1 | 1 | 1 | 1 | 177 | 7.5 | 15 |
| 0 | 1 | 1 | 1 | 1 | 1 | 178 | 7.5 | 15 |
| 0 | 1 | 1 | 1 | 1 | 1 | 179 | 7.5 | 15 |
| 0 | 1 | 1 | 1 | 1 | 1 | 180 | 7.5 | 15 |
| 1 | 0 | 0 | 0 | 0 | 0 | 31  | 2.5 | 45 |
| 1 | 0 | 0 | 0 | 0 | 0 | 32  | 2.5 | 45 |
| 1 | 0 | 0 | 0 | 0 | 0 | 33  | 2.5 | 45 |
| 1 | 0 | 0 | 0 | 0 | 0 | 34  | 2.5 | 45 |
| 1 | 0 | 0 | 0 | 0 | 0 | 35  | 2.5 | 45 |
| 1 | 0 | 0 | 0 | 0 | 0 | 36  | 2.5 | 45 |
| 1 | 0 | 0 | 0 | 0 | 0 | 37  | 2.5 | 45 |
| 1 | 0 | 0 | 0 | 0 | 0 | 38  | 2.5 | 45 |
| 1 | 0 | 0 | 0 | 0 | 0 | 39  | 2.5 | 45 |
| 1 | 0 | 0 | 0 | 0 | 0 | 40  | 2.5 | 45 |
| 1 | 0 | 0 | 0 | 0 | 0 | 41  | 2.5 | 45 |

|   |   |   |   |   |   |    |     |    |
|---|---|---|---|---|---|----|-----|----|
| 1 | 0 | 0 | 0 | 0 | 0 | 42 | 2.5 | 45 |
| 1 | 0 | 0 | 0 | 0 | 0 | 43 | 2.5 | 45 |
| 1 | 0 | 0 | 0 | 0 | 0 | 44 | 2.5 | 45 |
| 1 | 0 | 0 | 0 | 0 | 0 | 45 | 2.5 | 45 |
| 1 | 0 | 0 | 0 | 0 | 0 | 46 | 2.5 | 45 |
| 1 | 0 | 0 | 0 | 0 | 0 | 47 | 2.5 | 45 |
| 1 | 0 | 0 | 0 | 0 | 0 | 48 | 2.5 | 45 |
| 1 | 0 | 0 | 0 | 0 | 0 | 49 | 2.5 | 45 |
| 1 | 0 | 0 | 0 | 0 | 0 | 50 | 2.5 | 45 |
| 1 | 0 | 0 | 0 | 0 | 0 | 51 | 2.5 | 45 |
| 1 | 0 | 0 | 0 | 0 | 0 | 52 | 2.5 | 45 |
| 1 | 0 | 0 | 0 | 0 | 0 | 53 | 2.5 | 45 |
| 1 | 0 | 0 | 0 | 0 | 0 | 54 | 2.5 | 45 |
| 1 | 0 | 0 | 0 | 0 | 0 | 55 | 2.5 | 45 |
| 1 | 0 | 0 | 0 | 0 | 0 | 56 | 2.5 | 45 |
| 1 | 0 | 0 | 0 | 0 | 0 | 57 | 2.5 | 45 |
| 1 | 0 | 0 | 0 | 0 | 0 | 58 | 2.5 | 45 |
| 1 | 0 | 0 | 0 | 0 | 0 | 59 | 2.5 | 45 |
| 1 | 0 | 0 | 0 | 0 | 0 | 60 | 2.5 | 60 |
| 1 | 0 | 0 | 0 | 0 | 0 | 61 | 2.5 | 75 |
| 1 | 0 | 0 | 0 | 0 | 0 | 62 | 2.5 | 75 |
| 1 | 0 | 0 | 0 | 0 | 0 | 63 | 2.5 | 75 |
| 1 | 0 | 0 | 0 | 0 | 0 | 64 | 2.5 | 75 |
| 1 | 0 | 0 | 0 | 0 | 0 | 65 | 2.5 | 75 |
| 1 | 0 | 0 | 0 | 0 | 0 | 66 | 2.5 | 75 |
| 1 | 0 | 0 | 0 | 0 | 0 | 67 | 2.5 | 75 |
| 1 | 0 | 0 | 0 | 0 | 0 | 68 | 2.5 | 75 |
| 1 | 0 | 0 | 0 | 0 | 0 | 69 | 2.5 | 75 |
| 1 | 0 | 0 | 0 | 0 | 0 | 70 | 2.5 | 75 |
| 1 | 0 | 0 | 0 | 0 | 0 | 71 | 2.5 | 75 |
| 1 | 0 | 0 | 0 | 0 | 0 | 72 | 2.5 | 75 |
| 1 | 0 | 0 | 0 | 0 | 0 | 73 | 2.5 | 75 |
| 1 | 0 | 0 | 0 | 0 | 0 | 74 | 2.5 | 75 |
| 1 | 0 | 0 | 0 | 0 | 0 | 75 | 2.5 | 75 |
| 1 | 0 | 0 | 0 | 0 | 0 | 76 | 2.5 | 75 |
| 1 | 0 | 0 | 0 | 0 | 0 | 77 | 2.5 | 75 |
| 1 | 0 | 0 | 0 | 0 | 0 | 78 | 2.5 | 75 |
| 1 | 0 | 0 | 0 | 0 | 0 | 79 | 2.5 | 75 |
| 1 | 0 | 0 | 0 | 0 | 0 | 80 | 2.5 | 75 |
| 1 | 0 | 0 | 0 | 0 | 0 | 81 | 2.5 | 75 |
| 1 | 0 | 0 | 0 | 0 | 0 | 82 | 2.5 | 75 |
| 1 | 0 | 0 | 0 | 0 | 0 | 83 | 2.5 | 75 |
| 1 | 0 | 0 | 0 | 0 | 0 | 84 | 2.5 | 75 |
| 1 | 0 | 0 | 0 | 0 | 0 | 85 | 2.5 | 75 |
| 1 | 0 | 0 | 0 | 0 | 0 | 86 | 2.5 | 75 |
| 1 | 0 | 0 | 0 | 0 | 0 | 87 | 2.5 | 75 |

|   |   |   |   |   |   |     |     |     |
|---|---|---|---|---|---|-----|-----|-----|
| 1 | 0 | 0 | 0 | 0 | 0 | 88  | 2.5 | 75  |
| 1 | 0 | 0 | 0 | 0 | 0 | 89  | 2.5 | 75  |
| 1 | 0 | 0 | 0 | 0 | 0 | 90  | 2.5 | 90  |
| 1 | 0 | 0 | 0 | 0 | 0 | 91  | 2.5 | 105 |
| 1 | 0 | 0 | 0 | 0 | 0 | 92  | 2.5 | 105 |
| 1 | 0 | 0 | 0 | 0 | 0 | 93  | 2.5 | 105 |
| 1 | 0 | 0 | 0 | 0 | 0 | 94  | 2.5 | 105 |
| 1 | 0 | 0 | 0 | 0 | 0 | 95  | 2.5 | 105 |
| 1 | 0 | 0 | 0 | 0 | 0 | 96  | 2.5 | 105 |
| 1 | 0 | 0 | 0 | 0 | 0 | 97  | 2.5 | 105 |
| 1 | 0 | 0 | 0 | 0 | 0 | 98  | 2.5 | 105 |
| 1 | 0 | 0 | 0 | 0 | 0 | 99  | 2.5 | 105 |
| 1 | 0 | 0 | 0 | 0 | 0 | 100 | 2.5 | 105 |
| 1 | 0 | 0 | 0 | 0 | 0 | 101 | 2.5 | 105 |
| 1 | 0 | 0 | 0 | 0 | 0 | 102 | 2.5 | 105 |
| 1 | 0 | 0 | 0 | 0 | 0 | 103 | 2.5 | 105 |
| 1 | 0 | 0 | 0 | 0 | 0 | 104 | 2.5 | 105 |
| 1 | 0 | 0 | 0 | 0 | 0 | 105 | 2.5 | 105 |
| 1 | 0 | 0 | 0 | 0 | 0 | 106 | 2.5 | 105 |
| 1 | 0 | 0 | 0 | 0 | 0 | 107 | 2.5 | 105 |
| 1 | 0 | 0 | 0 | 0 | 0 | 108 | 2.5 | 105 |
| 1 | 0 | 0 | 0 | 0 | 0 | 109 | 2.5 | 105 |
| 1 | 0 | 0 | 0 | 0 | 0 | 110 | 2.5 | 105 |
| 1 | 0 | 0 | 0 | 0 | 0 | 111 | 2.5 | 105 |
| 1 | 0 | 0 | 0 | 0 | 0 | 112 | 2.5 | 105 |
| 1 | 0 | 0 | 0 | 0 | 0 | 113 | 2.5 | 105 |
| 1 | 0 | 0 | 0 | 0 | 0 | 114 | 2.5 | 105 |
| 1 | 0 | 0 | 0 | 0 | 0 | 115 | 2.5 | 105 |
| 1 | 0 | 0 | 0 | 0 | 0 | 116 | 2.5 | 105 |
| 1 | 0 | 0 | 0 | 0 | 0 | 117 | 2.5 | 105 |
| 1 | 0 | 0 | 0 | 0 | 0 | 118 | 2.5 | 105 |
| 1 | 0 | 0 | 0 | 0 | 0 | 119 | 2.5 | 105 |
| 1 | 0 | 0 | 0 | 0 | 0 | 120 | 2.5 | 120 |
| 1 | 0 | 0 | 0 | 0 | 0 | 121 | 2.5 | 135 |
| 1 | 0 | 0 | 0 | 0 | 0 | 122 | 2.5 | 135 |
| 1 | 0 | 0 | 0 | 0 | 0 | 123 | 2.5 | 135 |
| 1 | 0 | 0 | 0 | 0 | 0 | 124 | 2.5 | 135 |
| 1 | 0 | 0 | 0 | 0 | 0 | 125 | 2.5 | 135 |
| 1 | 0 | 0 | 0 | 0 | 0 | 126 | 2.5 | 135 |
| 1 | 0 | 0 | 0 | 0 | 0 | 127 | 2.5 | 135 |
| 1 | 0 | 0 | 0 | 0 | 0 | 128 | 2.5 | 135 |
| 1 | 0 | 0 | 0 | 0 | 0 | 129 | 2.5 | 135 |
| 1 | 0 | 0 | 0 | 0 | 0 | 130 | 2.5 | 135 |
| 1 | 0 | 0 | 0 | 0 | 0 | 131 | 2.5 | 135 |
| 1 | 0 | 0 | 0 | 0 | 0 | 132 | 2.5 | 135 |
| 1 | 0 | 0 | 0 | 0 | 0 | 133 | 2.5 | 135 |

|   |   |   |   |   |   |     |     |     |
|---|---|---|---|---|---|-----|-----|-----|
| 1 | 0 | 0 | 0 | 0 | 0 | 134 | 2.5 | 135 |
| 1 | 0 | 0 | 0 | 0 | 0 | 135 | 2.5 | 135 |
| 1 | 0 | 0 | 0 | 0 | 0 | 136 | 2.5 | 135 |
| 1 | 0 | 0 | 0 | 0 | 0 | 137 | 2.5 | 135 |
| 1 | 0 | 0 | 0 | 0 | 0 | 138 | 2.5 | 135 |
| 1 | 0 | 0 | 0 | 0 | 0 | 139 | 2.5 | 135 |
| 1 | 0 | 0 | 0 | 0 | 0 | 140 | 2.5 | 135 |
| 1 | 0 | 0 | 0 | 0 | 0 | 141 | 2.5 | 135 |
| 1 | 0 | 0 | 0 | 0 | 0 | 142 | 2.5 | 135 |
| 1 | 0 | 0 | 0 | 0 | 0 | 143 | 2.5 | 135 |
| 1 | 0 | 0 | 0 | 0 | 0 | 144 | 2.5 | 135 |
| 1 | 0 | 0 | 0 | 0 | 0 | 145 | 2.5 | 135 |
| 1 | 0 | 0 | 0 | 0 | 0 | 146 | 2.5 | 135 |
| 1 | 0 | 0 | 0 | 0 | 0 | 147 | 2.5 | 135 |
| 1 | 0 | 0 | 0 | 0 | 0 | 148 | 2.5 | 135 |
| 1 | 0 | 0 | 0 | 0 | 0 | 149 | 2.5 | 135 |
| 1 | 0 | 0 | 0 | 0 | 0 | 150 | 2.5 | 150 |
| 1 | 0 | 0 | 0 | 0 | 0 | 151 | 2.5 | 165 |
| 1 | 0 | 0 | 0 | 0 | 0 | 152 | 2.5 | 165 |
| 1 | 0 | 0 | 0 | 0 | 0 | 153 | 2.5 | 165 |
| 1 | 0 | 0 | 0 | 0 | 0 | 154 | 2.5 | 165 |
| 1 | 0 | 0 | 0 | 0 | 0 | 155 | 2.5 | 165 |
| 1 | 0 | 0 | 0 | 0 | 0 | 156 | 2.5 | 165 |
| 1 | 0 | 0 | 0 | 0 | 0 | 157 | 2.5 | 165 |
| 1 | 0 | 0 | 0 | 0 | 0 | 158 | 2.5 | 165 |
| 1 | 0 | 0 | 0 | 0 | 0 | 159 | 2.5 | 165 |
| 1 | 0 | 0 | 0 | 0 | 0 | 160 | 2.5 | 165 |
| 1 | 0 | 0 | 0 | 0 | 0 | 161 | 2.5 | 165 |
| 1 | 0 | 0 | 0 | 0 | 0 | 162 | 2.5 | 165 |
| 1 | 0 | 0 | 0 | 0 | 0 | 163 | 2.5 | 165 |
| 1 | 0 | 0 | 0 | 0 | 0 | 164 | 2.5 | 165 |
| 1 | 0 | 0 | 0 | 0 | 0 | 165 | 2.5 | 165 |
| 1 | 0 | 0 | 0 | 0 | 0 | 166 | 2.5 | 165 |
| 1 | 0 | 0 | 0 | 0 | 0 | 167 | 2.5 | 165 |
| 1 | 0 | 0 | 0 | 0 | 0 | 168 | 2.5 | 165 |
| 1 | 0 | 0 | 0 | 0 | 0 | 169 | 2.5 | 165 |
| 1 | 0 | 0 | 0 | 0 | 0 | 170 | 2.5 | 165 |
| 1 | 0 | 0 | 0 | 0 | 0 | 171 | 2.5 | 165 |
| 1 | 0 | 0 | 0 | 0 | 0 | 172 | 2.5 | 165 |
| 1 | 0 | 0 | 0 | 0 | 0 | 173 | 2.5 | 165 |
| 1 | 0 | 0 | 0 | 0 | 0 | 174 | 2.5 | 165 |
| 1 | 0 | 0 | 0 | 0 | 0 | 175 | 2.5 | 165 |
| 1 | 0 | 0 | 0 | 0 | 0 | 176 | 2.5 | 165 |
| 1 | 0 | 0 | 0 | 0 | 0 | 177 | 2.5 | 165 |
| 1 | 0 | 0 | 0 | 0 | 0 | 178 | 2.5 | 165 |
| 1 | 0 | 0 | 0 | 0 | 0 | 179 | 2.5 | 165 |

|   |   |   |   |   |   |     |     |     |
|---|---|---|---|---|---|-----|-----|-----|
| 1 | 0 | 0 | 0 | 0 | 0 | 180 | 2.5 | 180 |
| 0 | 1 | 0 | 0 | 0 | 0 | 0   | 2.5 | 0   |
| 0 | 1 | 0 | 0 | 0 | 0 | 1   | 2.5 | 15  |
| 0 | 1 | 0 | 0 | 0 | 0 | 2   | 2.5 | 15  |
| 0 | 1 | 0 | 0 | 0 | 0 | 3   | 2.5 | 15  |
| 0 | 1 | 0 | 0 | 0 | 0 | 4   | 2.5 | 15  |
| 0 | 1 | 0 | 0 | 0 | 0 | 5   | 2.5 | 15  |
| 0 | 1 | 0 | 0 | 0 | 0 | 6   | 2.5 | 15  |
| 0 | 1 | 0 | 0 | 0 | 0 | 7   | 2.5 | 15  |
| 0 | 1 | 0 | 0 | 0 | 0 | 8   | 2.5 | 15  |
| 0 | 1 | 0 | 0 | 0 | 0 | 9   | 2.5 | 15  |
| 0 | 1 | 0 | 0 | 0 | 0 | 10  | 2.5 | 15  |
| 0 | 1 | 0 | 0 | 0 | 0 | 11  | 2.5 | 15  |
| 0 | 1 | 0 | 0 | 0 | 0 | 12  | 2.5 | 15  |
| 0 | 1 | 0 | 0 | 0 | 0 | 13  | 2.5 | 15  |
| 0 | 1 | 0 | 0 | 0 | 0 | 14  | 2.5 | 15  |
| 0 | 1 | 0 | 0 | 0 | 0 | 15  | 2.5 | 15  |
| 0 | 1 | 0 | 0 | 0 | 0 | 16  | 2.5 | 15  |
| 0 | 1 | 0 | 0 | 0 | 0 | 17  | 2.5 | 15  |
| 0 | 1 | 0 | 0 | 0 | 0 | 18  | 2.5 | 15  |
| 0 | 1 | 0 | 0 | 0 | 0 | 19  | 2.5 | 15  |
| 0 | 1 | 0 | 0 | 0 | 0 | 20  | 2.5 | 15  |
| 0 | 1 | 0 | 0 | 0 | 0 | 21  | 2.5 | 15  |
| 0 | 1 | 0 | 0 | 0 | 0 | 22  | 2.5 | 15  |
| 0 | 1 | 0 | 0 | 0 | 0 | 23  | 2.5 | 15  |
| 0 | 1 | 0 | 0 | 0 | 0 | 24  | 2.5 | 15  |
| 0 | 1 | 0 | 0 | 0 | 0 | 25  | 2.5 | 15  |
| 0 | 1 | 0 | 0 | 0 | 0 | 26  | 2.5 | 15  |
| 0 | 1 | 0 | 0 | 0 | 0 | 27  | 2.5 | 15  |
| 0 | 1 | 0 | 0 | 0 | 0 | 28  | 2.5 | 15  |
| 0 | 1 | 0 | 0 | 0 | 0 | 29  | 2.5 | 15  |
| 0 | 1 | 0 | 0 | 0 | 0 | 61  | 2.5 | 75  |
| 0 | 1 | 0 | 0 | 0 | 0 | 62  | 2.5 | 75  |
| 0 | 1 | 0 | 0 | 0 | 0 | 63  | 2.5 | 75  |
| 0 | 1 | 0 | 0 | 0 | 0 | 64  | 2.5 | 75  |
| 0 | 1 | 0 | 0 | 0 | 0 | 65  | 2.5 | 75  |
| 0 | 1 | 0 | 0 | 0 | 0 | 66  | 2.5 | 75  |
| 0 | 1 | 0 | 0 | 0 | 0 | 67  | 2.5 | 75  |
| 0 | 1 | 0 | 0 | 0 | 0 | 68  | 2.5 | 75  |
| 0 | 1 | 0 | 0 | 0 | 0 | 69  | 2.5 | 75  |
| 0 | 1 | 0 | 0 | 0 | 0 | 70  | 2.5 | 75  |
| 0 | 1 | 0 | 0 | 0 | 0 | 71  | 2.5 | 75  |
| 0 | 1 | 0 | 0 | 0 | 0 | 72  | 2.5 | 75  |
| 0 | 1 | 0 | 0 | 0 | 0 | 73  | 2.5 | 75  |
| 0 | 1 | 0 | 0 | 0 | 0 | 74  | 2.5 | 75  |
| 0 | 1 | 0 | 0 | 0 | 0 | 75  | 2.5 | 75  |

|   |   |   |   |   |   |     |     |     |
|---|---|---|---|---|---|-----|-----|-----|
| 0 | 1 | 0 | 0 | 0 | 0 | 76  | 2.5 | 75  |
| 0 | 1 | 0 | 0 | 0 | 0 | 77  | 2.5 | 75  |
| 0 | 1 | 0 | 0 | 0 | 0 | 78  | 2.5 | 75  |
| 0 | 1 | 0 | 0 | 0 | 0 | 79  | 2.5 | 75  |
| 0 | 1 | 0 | 0 | 0 | 0 | 80  | 2.5 | 75  |
| 0 | 1 | 0 | 0 | 0 | 0 | 81  | 2.5 | 75  |
| 0 | 1 | 0 | 0 | 0 | 0 | 82  | 2.5 | 75  |
| 0 | 1 | 0 | 0 | 0 | 0 | 83  | 2.5 | 75  |
| 0 | 1 | 0 | 0 | 0 | 0 | 84  | 2.5 | 75  |
| 0 | 1 | 0 | 0 | 0 | 0 | 85  | 2.5 | 75  |
| 0 | 1 | 0 | 0 | 0 | 0 | 86  | 2.5 | 75  |
| 0 | 1 | 0 | 0 | 0 | 0 | 87  | 2.5 | 75  |
| 0 | 1 | 0 | 0 | 0 | 0 | 88  | 2.5 | 75  |
| 0 | 1 | 0 | 0 | 0 | 0 | 89  | 2.5 | 75  |
| 0 | 1 | 0 | 0 | 0 | 0 | 90  | 2.5 | 90  |
| 0 | 1 | 0 | 0 | 0 | 0 | 91  | 2.5 | 105 |
| 0 | 1 | 0 | 0 | 0 | 0 | 92  | 2.5 | 105 |
| 0 | 1 | 0 | 0 | 0 | 0 | 93  | 2.5 | 105 |
| 0 | 1 | 0 | 0 | 0 | 0 | 94  | 2.5 | 105 |
| 0 | 1 | 0 | 0 | 0 | 0 | 95  | 2.5 | 105 |
| 0 | 1 | 0 | 0 | 0 | 0 | 96  | 2.5 | 105 |
| 0 | 1 | 0 | 0 | 0 | 0 | 97  | 2.5 | 105 |
| 0 | 1 | 0 | 0 | 0 | 0 | 98  | 2.5 | 105 |
| 0 | 1 | 0 | 0 | 0 | 0 | 99  | 2.5 | 105 |
| 0 | 1 | 0 | 0 | 0 | 0 | 100 | 2.5 | 105 |
| 0 | 1 | 0 | 0 | 0 | 0 | 101 | 2.5 | 105 |
| 0 | 1 | 0 | 0 | 0 | 0 | 102 | 2.5 | 105 |
| 0 | 1 | 0 | 0 | 0 | 0 | 103 | 2.5 | 105 |
| 0 | 1 | 0 | 0 | 0 | 0 | 104 | 2.5 | 105 |
| 0 | 1 | 0 | 0 | 0 | 0 | 105 | 2.5 | 105 |
| 0 | 1 | 0 | 0 | 0 | 0 | 106 | 2.5 | 105 |
| 0 | 1 | 0 | 0 | 0 | 0 | 107 | 2.5 | 105 |
| 0 | 1 | 0 | 0 | 0 | 0 | 108 | 2.5 | 105 |
| 0 | 1 | 0 | 0 | 0 | 0 | 109 | 2.5 | 105 |
| 0 | 1 | 0 | 0 | 0 | 0 | 110 | 2.5 | 105 |
| 0 | 1 | 0 | 0 | 0 | 0 | 111 | 2.5 | 105 |
| 0 | 1 | 0 | 0 | 0 | 0 | 112 | 2.5 | 105 |
| 0 | 1 | 0 | 0 | 0 | 0 | 113 | 2.5 | 105 |
| 0 | 1 | 0 | 0 | 0 | 0 | 114 | 2.5 | 105 |
| 0 | 1 | 0 | 0 | 0 | 0 | 115 | 2.5 | 105 |
| 0 | 1 | 0 | 0 | 0 | 0 | 116 | 2.5 | 105 |
| 0 | 1 | 0 | 0 | 0 | 0 | 117 | 2.5 | 105 |
| 0 | 1 | 0 | 0 | 0 | 0 | 118 | 2.5 | 105 |
| 0 | 1 | 0 | 0 | 0 | 0 | 119 | 2.5 | 105 |
| 0 | 1 | 0 | 0 | 0 | 0 | 120 | 2.5 | 120 |
| 0 | 1 | 0 | 0 | 0 | 0 | 121 | 2.5 | 135 |

|   |   |   |   |   |   |     |     |     |
|---|---|---|---|---|---|-----|-----|-----|
| 0 | 1 | 0 | 0 | 0 | 0 | 122 | 2.5 | 135 |
| 0 | 1 | 0 | 0 | 0 | 0 | 123 | 2.5 | 135 |
| 0 | 1 | 0 | 0 | 0 | 0 | 124 | 2.5 | 135 |
| 0 | 1 | 0 | 0 | 0 | 0 | 125 | 2.5 | 135 |
| 0 | 1 | 0 | 0 | 0 | 0 | 126 | 2.5 | 135 |
| 0 | 1 | 0 | 0 | 0 | 0 | 127 | 2.5 | 135 |
| 0 | 1 | 0 | 0 | 0 | 0 | 128 | 2.5 | 135 |
| 0 | 1 | 0 | 0 | 0 | 0 | 129 | 2.5 | 135 |
| 0 | 1 | 0 | 0 | 0 | 0 | 130 | 2.5 | 135 |
| 0 | 1 | 0 | 0 | 0 | 0 | 131 | 2.5 | 135 |
| 0 | 1 | 0 | 0 | 0 | 0 | 132 | 2.5 | 135 |
| 0 | 1 | 0 | 0 | 0 | 0 | 133 | 2.5 | 135 |
| 0 | 1 | 0 | 0 | 0 | 0 | 134 | 2.5 | 135 |
| 0 | 1 | 0 | 0 | 0 | 0 | 135 | 2.5 | 135 |
| 0 | 1 | 0 | 0 | 0 | 0 | 136 | 2.5 | 135 |
| 0 | 1 | 0 | 0 | 0 | 0 | 137 | 2.5 | 135 |
| 0 | 1 | 0 | 0 | 0 | 0 | 138 | 2.5 | 135 |
| 0 | 1 | 0 | 0 | 0 | 0 | 139 | 2.5 | 135 |
| 0 | 1 | 0 | 0 | 0 | 0 | 140 | 2.5 | 135 |
| 0 | 1 | 0 | 0 | 0 | 0 | 141 | 2.5 | 135 |
| 0 | 1 | 0 | 0 | 0 | 0 | 142 | 2.5 | 135 |
| 0 | 1 | 0 | 0 | 0 | 0 | 143 | 2.5 | 135 |
| 0 | 1 | 0 | 0 | 0 | 0 | 144 | 2.5 | 135 |
| 0 | 1 | 0 | 0 | 0 | 0 | 145 | 2.5 | 135 |
| 0 | 1 | 0 | 0 | 0 | 0 | 146 | 2.5 | 135 |
| 0 | 1 | 0 | 0 | 0 | 0 | 147 | 2.5 | 135 |
| 0 | 1 | 0 | 0 | 0 | 0 | 148 | 2.5 | 135 |
| 0 | 1 | 0 | 0 | 0 | 0 | 149 | 2.5 | 135 |
| 0 | 1 | 0 | 0 | 0 | 0 | 150 | 2.5 | 150 |
| 0 | 1 | 0 | 0 | 0 | 0 | 151 | 2.5 | 165 |
| 0 | 1 | 0 | 0 | 0 | 0 | 152 | 2.5 | 165 |
| 0 | 1 | 0 | 0 | 0 | 0 | 153 | 2.5 | 165 |
| 0 | 1 | 0 | 0 | 0 | 0 | 154 | 2.5 | 165 |
| 0 | 1 | 0 | 0 | 0 | 0 | 155 | 2.5 | 165 |
| 0 | 1 | 0 | 0 | 0 | 0 | 156 | 2.5 | 165 |
| 0 | 1 | 0 | 0 | 0 | 0 | 157 | 2.5 | 165 |
| 0 | 1 | 0 | 0 | 0 | 0 | 158 | 2.5 | 165 |
| 0 | 1 | 0 | 0 | 0 | 0 | 159 | 2.5 | 165 |
| 0 | 1 | 0 | 0 | 0 | 0 | 160 | 2.5 | 165 |
| 0 | 1 | 0 | 0 | 0 | 0 | 161 | 2.5 | 165 |
| 0 | 1 | 0 | 0 | 0 | 0 | 162 | 2.5 | 165 |
| 0 | 1 | 0 | 0 | 0 | 0 | 163 | 2.5 | 165 |
| 0 | 1 | 0 | 0 | 0 | 0 | 164 | 2.5 | 165 |
| 0 | 1 | 0 | 0 | 0 | 0 | 165 | 2.5 | 165 |
| 0 | 1 | 0 | 0 | 0 | 0 | 166 | 2.5 | 165 |
| 0 | 1 | 0 | 0 | 0 | 0 | 167 | 2.5 | 165 |

|   |   |   |   |   |   |     |     |     |
|---|---|---|---|---|---|-----|-----|-----|
| 0 | 1 | 0 | 0 | 0 | 0 | 168 | 2.5 | 165 |
| 0 | 1 | 0 | 0 | 0 | 0 | 169 | 2.5 | 165 |
| 0 | 1 | 0 | 0 | 0 | 0 | 170 | 2.5 | 165 |
| 0 | 1 | 0 | 0 | 0 | 0 | 171 | 2.5 | 165 |
| 0 | 1 | 0 | 0 | 0 | 0 | 172 | 2.5 | 165 |
| 0 | 1 | 0 | 0 | 0 | 0 | 173 | 2.5 | 165 |
| 0 | 1 | 0 | 0 | 0 | 0 | 174 | 2.5 | 165 |
| 0 | 1 | 0 | 0 | 0 | 0 | 175 | 2.5 | 165 |
| 0 | 1 | 0 | 0 | 0 | 0 | 176 | 2.5 | 165 |
| 0 | 1 | 0 | 0 | 0 | 0 | 177 | 2.5 | 165 |
| 0 | 1 | 0 | 0 | 0 | 0 | 178 | 2.5 | 165 |
| 0 | 1 | 0 | 0 | 0 | 0 | 179 | 2.5 | 165 |
| 0 | 1 | 0 | 0 | 0 | 0 | 180 | 2.5 | 180 |
| 0 | 0 | 1 | 0 | 0 | 0 | 0   | 2.5 | 0   |
| 0 | 0 | 1 | 0 | 0 | 0 | 1   | 2.5 | 15  |
| 0 | 0 | 1 | 0 | 0 | 0 | 2   | 2.5 | 15  |
| 0 | 0 | 1 | 0 | 0 | 0 | 3   | 2.5 | 15  |
| 0 | 0 | 1 | 0 | 0 | 0 | 4   | 2.5 | 15  |
| 0 | 0 | 1 | 0 | 0 | 0 | 5   | 2.5 | 15  |
| 0 | 0 | 1 | 0 | 0 | 0 | 6   | 2.5 | 15  |
| 0 | 0 | 1 | 0 | 0 | 0 | 7   | 2.5 | 15  |
| 0 | 0 | 1 | 0 | 0 | 0 | 8   | 2.5 | 15  |
| 0 | 0 | 1 | 0 | 0 | 0 | 9   | 2.5 | 15  |
| 0 | 0 | 1 | 0 | 0 | 0 | 10  | 2.5 | 15  |
| 0 | 0 | 1 | 0 | 0 | 0 | 11  | 2.5 | 15  |
| 0 | 0 | 1 | 0 | 0 | 0 | 12  | 2.5 | 15  |
| 0 | 0 | 1 | 0 | 0 | 0 | 13  | 2.5 | 15  |
| 0 | 0 | 1 | 0 | 0 | 0 | 14  | 2.5 | 15  |
| 0 | 0 | 1 | 0 | 0 | 0 | 15  | 2.5 | 15  |
| 0 | 0 | 1 | 0 | 0 | 0 | 16  | 2.5 | 15  |
| 0 | 0 | 1 | 0 | 0 | 0 | 17  | 2.5 | 15  |
| 0 | 0 | 1 | 0 | 0 | 0 | 18  | 2.5 | 15  |
| 0 | 0 | 1 | 0 | 0 | 0 | 19  | 2.5 | 15  |
| 0 | 0 | 1 | 0 | 0 | 0 | 20  | 2.5 | 15  |
| 0 | 0 | 1 | 0 | 0 | 0 | 21  | 2.5 | 15  |
| 0 | 0 | 1 | 0 | 0 | 0 | 22  | 2.5 | 15  |
| 0 | 0 | 1 | 0 | 0 | 0 | 23  | 2.5 | 15  |
| 0 | 0 | 1 | 0 | 0 | 0 | 24  | 2.5 | 15  |
| 0 | 0 | 1 | 0 | 0 | 0 | 25  | 2.5 | 15  |
| 0 | 0 | 1 | 0 | 0 | 0 | 26  | 2.5 | 15  |
| 0 | 0 | 1 | 0 | 0 | 0 | 27  | 2.5 | 15  |
| 0 | 0 | 1 | 0 | 0 | 0 | 28  | 2.5 | 15  |
| 0 | 0 | 1 | 0 | 0 | 0 | 29  | 2.5 | 15  |
| 0 | 0 | 1 | 0 | 0 | 0 | 30  | 2.5 | 30  |
| 0 | 0 | 1 | 0 | 0 | 0 | 31  | 2.5 | 45  |
| 0 | 0 | 1 | 0 | 0 | 0 | 32  | 2.5 | 45  |

|   |   |   |   |   |   |     |     |     |
|---|---|---|---|---|---|-----|-----|-----|
| 0 | 0 | 1 | 0 | 0 | 0 | 33  | 2.5 | 45  |
| 0 | 0 | 1 | 0 | 0 | 0 | 34  | 2.5 | 45  |
| 0 | 0 | 1 | 0 | 0 | 0 | 35  | 2.5 | 45  |
| 0 | 0 | 1 | 0 | 0 | 0 | 36  | 2.5 | 45  |
| 0 | 0 | 1 | 0 | 0 | 0 | 37  | 2.5 | 45  |
| 0 | 0 | 1 | 0 | 0 | 0 | 38  | 2.5 | 45  |
| 0 | 0 | 1 | 0 | 0 | 0 | 39  | 2.5 | 45  |
| 0 | 0 | 1 | 0 | 0 | 0 | 40  | 2.5 | 45  |
| 0 | 0 | 1 | 0 | 0 | 0 | 41  | 2.5 | 45  |
| 0 | 0 | 1 | 0 | 0 | 0 | 42  | 2.5 | 45  |
| 0 | 0 | 1 | 0 | 0 | 0 | 43  | 2.5 | 45  |
| 0 | 0 | 1 | 0 | 0 | 0 | 44  | 2.5 | 45  |
| 0 | 0 | 1 | 0 | 0 | 0 | 45  | 2.5 | 45  |
| 0 | 0 | 1 | 0 | 0 | 0 | 46  | 2.5 | 45  |
| 0 | 0 | 1 | 0 | 0 | 0 | 47  | 2.5 | 45  |
| 0 | 0 | 1 | 0 | 0 | 0 | 48  | 2.5 | 45  |
| 0 | 0 | 1 | 0 | 0 | 0 | 49  | 2.5 | 45  |
| 0 | 0 | 1 | 0 | 0 | 0 | 50  | 2.5 | 45  |
| 0 | 0 | 1 | 0 | 0 | 0 | 51  | 2.5 | 45  |
| 0 | 0 | 1 | 0 | 0 | 0 | 52  | 2.5 | 45  |
| 0 | 0 | 1 | 0 | 0 | 0 | 53  | 2.5 | 45  |
| 0 | 0 | 1 | 0 | 0 | 0 | 54  | 2.5 | 45  |
| 0 | 0 | 1 | 0 | 0 | 0 | 55  | 2.5 | 45  |
| 0 | 0 | 1 | 0 | 0 | 0 | 56  | 2.5 | 45  |
| 0 | 0 | 1 | 0 | 0 | 0 | 57  | 2.5 | 45  |
| 0 | 0 | 1 | 0 | 0 | 0 | 58  | 2.5 | 45  |
| 0 | 0 | 1 | 0 | 0 | 0 | 59  | 2.5 | 45  |
| 0 | 0 | 1 | 0 | 0 | 0 | 91  | 2.5 | 105 |
| 0 | 0 | 1 | 0 | 0 | 0 | 92  | 2.5 | 105 |
| 0 | 0 | 1 | 0 | 0 | 0 | 93  | 2.5 | 105 |
| 0 | 0 | 1 | 0 | 0 | 0 | 94  | 2.5 | 105 |
| 0 | 0 | 1 | 0 | 0 | 0 | 95  | 2.5 | 105 |
| 0 | 0 | 1 | 0 | 0 | 0 | 96  | 2.5 | 105 |
| 0 | 0 | 1 | 0 | 0 | 0 | 97  | 2.5 | 105 |
| 0 | 0 | 1 | 0 | 0 | 0 | 98  | 2.5 | 105 |
| 0 | 0 | 1 | 0 | 0 | 0 | 99  | 2.5 | 105 |
| 0 | 0 | 1 | 0 | 0 | 0 | 100 | 2.5 | 105 |
| 0 | 0 | 1 | 0 | 0 | 0 | 101 | 2.5 | 105 |
| 0 | 0 | 1 | 0 | 0 | 0 | 102 | 2.5 | 105 |
| 0 | 0 | 1 | 0 | 0 | 0 | 103 | 2.5 | 105 |
| 0 | 0 | 1 | 0 | 0 | 0 | 104 | 2.5 | 105 |
| 0 | 0 | 1 | 0 | 0 | 0 | 105 | 2.5 | 105 |
| 0 | 0 | 1 | 0 | 0 | 0 | 106 | 2.5 | 105 |
| 0 | 0 | 1 | 0 | 0 | 0 | 107 | 2.5 | 105 |
| 0 | 0 | 1 | 0 | 0 | 0 | 108 | 2.5 | 105 |
| 0 | 0 | 1 | 0 | 0 | 0 | 109 | 2.5 | 105 |
| 0 | 0 | 1 | 0 | 0 | 0 | 110 | 2.5 | 105 |

|   |   |   |   |   |   |     |     |     |
|---|---|---|---|---|---|-----|-----|-----|
| 0 | 0 | 1 | 0 | 0 | 0 | 111 | 2.5 | 105 |
| 0 | 0 | 1 | 0 | 0 | 0 | 112 | 2.5 | 105 |
| 0 | 0 | 1 | 0 | 0 | 0 | 113 | 2.5 | 105 |
| 0 | 0 | 1 | 0 | 0 | 0 | 114 | 2.5 | 105 |
| 0 | 0 | 1 | 0 | 0 | 0 | 115 | 2.5 | 105 |
| 0 | 0 | 1 | 0 | 0 | 0 | 116 | 2.5 | 105 |
| 0 | 0 | 1 | 0 | 0 | 0 | 117 | 2.5 | 105 |
| 0 | 0 | 1 | 0 | 0 | 0 | 118 | 2.5 | 105 |
| 0 | 0 | 1 | 0 | 0 | 0 | 119 | 2.5 | 105 |
| 0 | 0 | 1 | 0 | 0 | 0 | 120 | 2.5 | 120 |
| 0 | 0 | 1 | 0 | 0 | 0 | 121 | 2.5 | 135 |
| 0 | 0 | 1 | 0 | 0 | 0 | 122 | 2.5 | 135 |
| 0 | 0 | 1 | 0 | 0 | 0 | 123 | 2.5 | 135 |
| 0 | 0 | 1 | 0 | 0 | 0 | 124 | 2.5 | 135 |
| 0 | 0 | 1 | 0 | 0 | 0 | 125 | 2.5 | 135 |
| 0 | 0 | 1 | 0 | 0 | 0 | 126 | 2.5 | 135 |
| 0 | 0 | 1 | 0 | 0 | 0 | 127 | 2.5 | 135 |
| 0 | 0 | 1 | 0 | 0 | 0 | 128 | 2.5 | 135 |
| 0 | 0 | 1 | 0 | 0 | 0 | 129 | 2.5 | 135 |
| 0 | 0 | 1 | 0 | 0 | 0 | 130 | 2.5 | 135 |
| 0 | 0 | 1 | 0 | 0 | 0 | 131 | 2.5 | 135 |
| 0 | 0 | 1 | 0 | 0 | 0 | 132 | 2.5 | 135 |
| 0 | 0 | 1 | 0 | 0 | 0 | 133 | 2.5 | 135 |
| 0 | 0 | 1 | 0 | 0 | 0 | 134 | 2.5 | 135 |
| 0 | 0 | 1 | 0 | 0 | 0 | 135 | 2.5 | 135 |
| 0 | 0 | 1 | 0 | 0 | 0 | 136 | 2.5 | 135 |
| 0 | 0 | 1 | 0 | 0 | 0 | 137 | 2.5 | 135 |
| 0 | 0 | 1 | 0 | 0 | 0 | 138 | 2.5 | 135 |
| 0 | 0 | 1 | 0 | 0 | 0 | 139 | 2.5 | 135 |
| 0 | 0 | 1 | 0 | 0 | 0 | 140 | 2.5 | 135 |
| 0 | 0 | 1 | 0 | 0 | 0 | 141 | 2.5 | 135 |
| 0 | 0 | 1 | 0 | 0 | 0 | 142 | 2.5 | 135 |
| 0 | 0 | 1 | 0 | 0 | 0 | 143 | 2.5 | 135 |
| 0 | 0 | 1 | 0 | 0 | 0 | 144 | 2.5 | 135 |
| 0 | 0 | 1 | 0 | 0 | 0 | 145 | 2.5 | 135 |
| 0 | 0 | 1 | 0 | 0 | 0 | 146 | 2.5 | 135 |
| 0 | 0 | 1 | 0 | 0 | 0 | 147 | 2.5 | 135 |
| 0 | 0 | 1 | 0 | 0 | 0 | 148 | 2.5 | 135 |
| 0 | 0 | 1 | 0 | 0 | 0 | 149 | 2.5 | 135 |
| 0 | 0 | 1 | 0 | 0 | 0 | 150 | 2.5 | 150 |
| 0 | 0 | 1 | 0 | 0 | 0 | 151 | 2.5 | 165 |
| 0 | 0 | 1 | 0 | 0 | 0 | 152 | 2.5 | 165 |
| 0 | 0 | 1 | 0 | 0 | 0 | 153 | 2.5 | 165 |
| 0 | 0 | 1 | 0 | 0 | 0 | 154 | 2.5 | 165 |
| 0 | 0 | 1 | 0 | 0 | 0 | 155 | 2.5 | 165 |
| 0 | 0 | 1 | 0 | 0 | 0 | 156 | 2.5 | 165 |

|   |   |   |   |   |   |     |     |     |
|---|---|---|---|---|---|-----|-----|-----|
| 0 | 0 | 1 | 0 | 0 | 0 | 157 | 2.5 | 165 |
| 0 | 0 | 1 | 0 | 0 | 0 | 158 | 2.5 | 165 |
| 0 | 0 | 1 | 0 | 0 | 0 | 159 | 2.5 | 165 |
| 0 | 0 | 1 | 0 | 0 | 0 | 160 | 2.5 | 165 |
| 0 | 0 | 1 | 0 | 0 | 0 | 161 | 2.5 | 165 |
| 0 | 0 | 1 | 0 | 0 | 0 | 162 | 2.5 | 165 |
| 0 | 0 | 1 | 0 | 0 | 0 | 163 | 2.5 | 165 |
| 0 | 0 | 1 | 0 | 0 | 0 | 164 | 2.5 | 165 |
| 0 | 0 | 1 | 0 | 0 | 0 | 165 | 2.5 | 165 |
| 0 | 0 | 1 | 0 | 0 | 0 | 166 | 2.5 | 165 |
| 0 | 0 | 1 | 0 | 0 | 0 | 167 | 2.5 | 165 |
| 0 | 0 | 1 | 0 | 0 | 0 | 168 | 2.5 | 165 |
| 0 | 0 | 1 | 0 | 0 | 0 | 169 | 2.5 | 165 |
| 0 | 0 | 1 | 0 | 0 | 0 | 170 | 2.5 | 165 |
| 0 | 0 | 1 | 0 | 0 | 0 | 171 | 2.5 | 165 |
| 0 | 0 | 1 | 0 | 0 | 0 | 172 | 2.5 | 165 |
| 0 | 0 | 1 | 0 | 0 | 0 | 173 | 2.5 | 165 |
| 0 | 0 | 1 | 0 | 0 | 0 | 174 | 2.5 | 165 |
| 0 | 0 | 1 | 0 | 0 | 0 | 175 | 2.5 | 165 |
| 0 | 0 | 1 | 0 | 0 | 0 | 176 | 2.5 | 165 |
| 0 | 0 | 1 | 0 | 0 | 0 | 177 | 2.5 | 165 |
| 0 | 0 | 1 | 0 | 0 | 0 | 178 | 2.5 | 165 |
| 0 | 0 | 1 | 0 | 0 | 0 | 179 | 2.5 | 165 |
| 0 | 0 | 1 | 0 | 0 | 0 | 180 | 2.5 | 180 |
| 0 | 0 | 0 | 1 | 0 | 0 | 0   | 2.5 | 0   |
| 0 | 0 | 0 | 1 | 0 | 0 | 1   | 2.5 | 15  |
| 0 | 0 | 0 | 1 | 0 | 0 | 2   | 2.5 | 15  |
| 0 | 0 | 0 | 1 | 0 | 0 | 3   | 2.5 | 15  |
| 0 | 0 | 0 | 1 | 0 | 0 | 4   | 2.5 | 15  |
| 0 | 0 | 0 | 1 | 0 | 0 | 5   | 2.5 | 15  |
| 0 | 0 | 0 | 1 | 0 | 0 | 6   | 2.5 | 15  |
| 0 | 0 | 0 | 1 | 0 | 0 | 7   | 2.5 | 15  |
| 0 | 0 | 0 | 1 | 0 | 0 | 8   | 2.5 | 15  |
| 0 | 0 | 0 | 1 | 0 | 0 | 9   | 2.5 | 15  |
| 0 | 0 | 0 | 1 | 0 | 0 | 10  | 2.5 | 15  |
| 0 | 0 | 0 | 1 | 0 | 0 | 11  | 2.5 | 15  |
| 0 | 0 | 0 | 1 | 0 | 0 | 12  | 2.5 | 15  |
| 0 | 0 | 0 | 1 | 0 | 0 | 13  | 2.5 | 15  |
| 0 | 0 | 0 | 1 | 0 | 0 | 14  | 2.5 | 15  |
| 0 | 0 | 0 | 1 | 0 | 0 | 15  | 2.5 | 15  |
| 0 | 0 | 0 | 1 | 0 | 0 | 16  | 2.5 | 15  |
| 0 | 0 | 0 | 1 | 0 | 0 | 17  | 2.5 | 15  |
| 0 | 0 | 0 | 1 | 0 | 0 | 18  | 2.5 | 15  |
| 0 | 0 | 0 | 1 | 0 | 0 | 19  | 2.5 | 15  |
| 0 | 0 | 0 | 1 | 0 | 0 | 20  | 2.5 | 15  |
| 0 | 0 | 0 | 1 | 0 | 0 | 21  | 2.5 | 15  |

|   |   |   |   |   |   |    |     |    |
|---|---|---|---|---|---|----|-----|----|
| 0 | 0 | 0 | 1 | 0 | 0 | 22 | 2.5 | 15 |
| 0 | 0 | 0 | 1 | 0 | 0 | 23 | 2.5 | 15 |
| 0 | 0 | 0 | 1 | 0 | 0 | 24 | 2.5 | 15 |
| 0 | 0 | 0 | 1 | 0 | 0 | 25 | 2.5 | 15 |
| 0 | 0 | 0 | 1 | 0 | 0 | 26 | 2.5 | 15 |
| 0 | 0 | 0 | 1 | 0 | 0 | 27 | 2.5 | 15 |
| 0 | 0 | 0 | 1 | 0 | 0 | 28 | 2.5 | 15 |
| 0 | 0 | 0 | 1 | 0 | 0 | 29 | 2.5 | 15 |
| 0 | 0 | 0 | 1 | 0 | 0 | 30 | 2.5 | 30 |
| 0 | 0 | 0 | 1 | 0 | 0 | 31 | 2.5 | 45 |
| 0 | 0 | 0 | 1 | 0 | 0 | 32 | 2.5 | 45 |
| 0 | 0 | 0 | 1 | 0 | 0 | 33 | 2.5 | 45 |
| 0 | 0 | 0 | 1 | 0 | 0 | 34 | 2.5 | 45 |
| 0 | 0 | 0 | 1 | 0 | 0 | 35 | 2.5 | 45 |
| 0 | 0 | 0 | 1 | 0 | 0 | 36 | 2.5 | 45 |
| 0 | 0 | 0 | 1 | 0 | 0 | 37 | 2.5 | 45 |
| 0 | 0 | 0 | 1 | 0 | 0 | 38 | 2.5 | 45 |
| 0 | 0 | 0 | 1 | 0 | 0 | 39 | 2.5 | 45 |
| 0 | 0 | 0 | 1 | 0 | 0 | 40 | 2.5 | 45 |
| 0 | 0 | 0 | 1 | 0 | 0 | 41 | 2.5 | 45 |
| 0 | 0 | 0 | 1 | 0 | 0 | 42 | 2.5 | 45 |
| 0 | 0 | 0 | 1 | 0 | 0 | 43 | 2.5 | 45 |
| 0 | 0 | 0 | 1 | 0 | 0 | 44 | 2.5 | 45 |
| 0 | 0 | 0 | 1 | 0 | 0 | 45 | 2.5 | 45 |
| 0 | 0 | 0 | 1 | 0 | 0 | 46 | 2.5 | 45 |
| 0 | 0 | 0 | 1 | 0 | 0 | 47 | 2.5 | 45 |
| 0 | 0 | 0 | 1 | 0 | 0 | 48 | 2.5 | 45 |
| 0 | 0 | 0 | 1 | 0 | 0 | 49 | 2.5 | 45 |
| 0 | 0 | 0 | 1 | 0 | 0 | 50 | 2.5 | 45 |
| 0 | 0 | 0 | 1 | 0 | 0 | 51 | 2.5 | 45 |
| 0 | 0 | 0 | 1 | 0 | 0 | 52 | 2.5 | 45 |
| 0 | 0 | 0 | 1 | 0 | 0 | 53 | 2.5 | 45 |
| 0 | 0 | 0 | 1 | 0 | 0 | 54 | 2.5 | 45 |
| 0 | 0 | 0 | 1 | 0 | 0 | 55 | 2.5 | 45 |
| 0 | 0 | 0 | 1 | 0 | 0 | 56 | 2.5 | 45 |
| 0 | 0 | 0 | 1 | 0 | 0 | 57 | 2.5 | 45 |
| 0 | 0 | 0 | 1 | 0 | 0 | 58 | 2.5 | 45 |
| 0 | 0 | 0 | 1 | 0 | 0 | 59 | 2.5 | 45 |
| 0 | 0 | 0 | 1 | 0 | 0 | 60 | 2.5 | 60 |
| 0 | 0 | 0 | 1 | 0 | 0 | 61 | 2.5 | 75 |
| 0 | 0 | 0 | 1 | 0 | 0 | 62 | 2.5 | 75 |
| 0 | 0 | 0 | 1 | 0 | 0 | 63 | 2.5 | 75 |
| 0 | 0 | 0 | 1 | 0 | 0 | 64 | 2.5 | 75 |
| 0 | 0 | 0 | 1 | 0 | 0 | 65 | 2.5 | 75 |
| 0 | 0 | 0 | 1 | 0 | 0 | 66 | 2.5 | 75 |
| 0 | 0 | 0 | 1 | 0 | 0 | 67 | 2.5 | 75 |

|   |   |   |   |   |   |     |     |     |
|---|---|---|---|---|---|-----|-----|-----|
| 0 | 0 | 0 | 1 | 0 | 0 | 68  | 2.5 | 75  |
| 0 | 0 | 0 | 1 | 0 | 0 | 69  | 2.5 | 75  |
| 0 | 0 | 0 | 1 | 0 | 0 | 70  | 2.5 | 75  |
| 0 | 0 | 0 | 1 | 0 | 0 | 71  | 2.5 | 75  |
| 0 | 0 | 0 | 1 | 0 | 0 | 72  | 2.5 | 75  |
| 0 | 0 | 0 | 1 | 0 | 0 | 73  | 2.5 | 75  |
| 0 | 0 | 0 | 1 | 0 | 0 | 74  | 2.5 | 75  |
| 0 | 0 | 0 | 1 | 0 | 0 | 75  | 2.5 | 75  |
| 0 | 0 | 0 | 1 | 0 | 0 | 76  | 2.5 | 75  |
| 0 | 0 | 0 | 1 | 0 | 0 | 77  | 2.5 | 75  |
| 0 | 0 | 0 | 1 | 0 | 0 | 78  | 2.5 | 75  |
| 0 | 0 | 0 | 1 | 0 | 0 | 79  | 2.5 | 75  |
| 0 | 0 | 0 | 1 | 0 | 0 | 80  | 2.5 | 75  |
| 0 | 0 | 0 | 1 | 0 | 0 | 81  | 2.5 | 75  |
| 0 | 0 | 0 | 1 | 0 | 0 | 82  | 2.5 | 75  |
| 0 | 0 | 0 | 1 | 0 | 0 | 83  | 2.5 | 75  |
| 0 | 0 | 0 | 1 | 0 | 0 | 84  | 2.5 | 75  |
| 0 | 0 | 0 | 1 | 0 | 0 | 85  | 2.5 | 75  |
| 0 | 0 | 0 | 1 | 0 | 0 | 86  | 2.5 | 75  |
| 0 | 0 | 0 | 1 | 0 | 0 | 87  | 2.5 | 75  |
| 0 | 0 | 0 | 1 | 0 | 0 | 88  | 2.5 | 75  |
| 0 | 0 | 0 | 1 | 0 | 0 | 89  | 2.5 | 75  |
| 0 | 0 | 0 | 1 | 0 | 0 | 121 | 2.5 | 135 |
| 0 | 0 | 0 | 1 | 0 | 0 | 122 | 2.5 | 135 |
| 0 | 0 | 0 | 1 | 0 | 0 | 123 | 2.5 | 135 |
| 0 | 0 | 0 | 1 | 0 | 0 | 124 | 2.5 | 135 |
| 0 | 0 | 0 | 1 | 0 | 0 | 125 | 2.5 | 135 |
| 0 | 0 | 0 | 1 | 0 | 0 | 126 | 2.5 | 135 |
| 0 | 0 | 0 | 1 | 0 | 0 | 127 | 2.5 | 135 |
| 0 | 0 | 0 | 1 | 0 | 0 | 128 | 2.5 | 135 |
| 0 | 0 | 0 | 1 | 0 | 0 | 129 | 2.5 | 135 |
| 0 | 0 | 0 | 1 | 0 | 0 | 130 | 2.5 | 135 |
| 0 | 0 | 0 | 1 | 0 | 0 | 131 | 2.5 | 135 |
| 0 | 0 | 0 | 1 | 0 | 0 | 132 | 2.5 | 135 |
| 0 | 0 | 0 | 1 | 0 | 0 | 133 | 2.5 | 135 |
| 0 | 0 | 0 | 1 | 0 | 0 | 134 | 2.5 | 135 |
| 0 | 0 | 0 | 1 | 0 | 0 | 135 | 2.5 | 135 |
| 0 | 0 | 0 | 1 | 0 | 0 | 136 | 2.5 | 135 |
| 0 | 0 | 0 | 1 | 0 | 0 | 137 | 2.5 | 135 |
| 0 | 0 | 0 | 1 | 0 | 0 | 138 | 2.5 | 135 |
| 0 | 0 | 0 | 1 | 0 | 0 | 139 | 2.5 | 135 |
| 0 | 0 | 0 | 1 | 0 | 0 | 140 | 2.5 | 135 |
| 0 | 0 | 0 | 1 | 0 | 0 | 141 | 2.5 | 135 |
| 0 | 0 | 0 | 1 | 0 | 0 | 142 | 2.5 | 135 |
| 0 | 0 | 0 | 1 | 0 | 0 | 143 | 2.5 | 135 |
| 0 | 0 | 0 | 1 | 0 | 0 | 144 | 2.5 | 135 |
| 0 | 0 | 0 | 1 | 0 | 0 | 145 | 2.5 | 135 |

|   |   |   |   |   |   |     |     |     |
|---|---|---|---|---|---|-----|-----|-----|
| 0 | 0 | 0 | 1 | 0 | 0 | 146 | 2.5 | 135 |
| 0 | 0 | 0 | 1 | 0 | 0 | 147 | 2.5 | 135 |
| 0 | 0 | 0 | 1 | 0 | 0 | 148 | 2.5 | 135 |
| 0 | 0 | 0 | 1 | 0 | 0 | 149 | 2.5 | 135 |
| 0 | 0 | 0 | 1 | 0 | 0 | 150 | 2.5 | 150 |
| 0 | 0 | 0 | 1 | 0 | 0 | 151 | 2.5 | 165 |
| 0 | 0 | 0 | 1 | 0 | 0 | 152 | 2.5 | 165 |
| 0 | 0 | 0 | 1 | 0 | 0 | 153 | 2.5 | 165 |
| 0 | 0 | 0 | 1 | 0 | 0 | 154 | 2.5 | 165 |
| 0 | 0 | 0 | 1 | 0 | 0 | 155 | 2.5 | 165 |
| 0 | 0 | 0 | 1 | 0 | 0 | 156 | 2.5 | 165 |
| 0 | 0 | 0 | 1 | 0 | 0 | 157 | 2.5 | 165 |
| 0 | 0 | 0 | 1 | 0 | 0 | 158 | 2.5 | 165 |
| 0 | 0 | 0 | 1 | 0 | 0 | 159 | 2.5 | 165 |
| 0 | 0 | 0 | 1 | 0 | 0 | 160 | 2.5 | 165 |
| 0 | 0 | 0 | 1 | 0 | 0 | 161 | 2.5 | 165 |
| 0 | 0 | 0 | 1 | 0 | 0 | 162 | 2.5 | 165 |
| 0 | 0 | 0 | 1 | 0 | 0 | 163 | 2.5 | 165 |
| 0 | 0 | 0 | 1 | 0 | 0 | 164 | 2.5 | 165 |
| 0 | 0 | 0 | 1 | 0 | 0 | 165 | 2.5 | 165 |
| 0 | 0 | 0 | 1 | 0 | 0 | 166 | 2.5 | 165 |
| 0 | 0 | 0 | 1 | 0 | 0 | 167 | 2.5 | 165 |
| 0 | 0 | 0 | 1 | 0 | 0 | 168 | 2.5 | 165 |
| 0 | 0 | 0 | 1 | 0 | 0 | 169 | 2.5 | 165 |
| 0 | 0 | 0 | 1 | 0 | 0 | 170 | 2.5 | 165 |
| 0 | 0 | 0 | 1 | 0 | 0 | 171 | 2.5 | 165 |
| 0 | 0 | 0 | 1 | 0 | 0 | 172 | 2.5 | 165 |
| 0 | 0 | 0 | 1 | 0 | 0 | 173 | 2.5 | 165 |
| 0 | 0 | 0 | 1 | 0 | 0 | 174 | 2.5 | 165 |
| 0 | 0 | 0 | 1 | 0 | 0 | 175 | 2.5 | 165 |
| 0 | 0 | 0 | 1 | 0 | 0 | 176 | 2.5 | 165 |
| 0 | 0 | 0 | 1 | 0 | 0 | 177 | 2.5 | 165 |
| 0 | 0 | 0 | 1 | 0 | 0 | 178 | 2.5 | 165 |
| 0 | 0 | 0 | 1 | 0 | 0 | 179 | 2.5 | 165 |
| 0 | 0 | 0 | 1 | 0 | 0 | 180 | 2.5 | 180 |
| 0 | 0 | 0 | 0 | 1 | 0 | 0   | 2.5 | 0   |
| 0 | 0 | 0 | 0 | 1 | 0 | 1   | 2.5 | 15  |
| 0 | 0 | 0 | 0 | 1 | 0 | 2   | 2.5 | 15  |
| 0 | 0 | 0 | 0 | 1 | 0 | 3   | 2.5 | 15  |
| 0 | 0 | 0 | 0 | 1 | 0 | 4   | 2.5 | 15  |
| 0 | 0 | 0 | 0 | 1 | 0 | 5   | 2.5 | 15  |
| 0 | 0 | 0 | 0 | 1 | 0 | 6   | 2.5 | 15  |
| 0 | 0 | 0 | 0 | 1 | 0 | 7   | 2.5 | 15  |
| 0 | 0 | 0 | 0 | 1 | 0 | 8   | 2.5 | 15  |
| 0 | 0 | 0 | 0 | 1 | 0 | 9   | 2.5 | 15  |
| 0 | 0 | 0 | 0 | 1 | 0 | 10  | 2.5 | 15  |

|   |   |   |   |   |   |    |     |    |
|---|---|---|---|---|---|----|-----|----|
| 0 | 0 | 0 | 0 | 1 | 0 | 11 | 2.5 | 15 |
| 0 | 0 | 0 | 0 | 1 | 0 | 12 | 2.5 | 15 |
| 0 | 0 | 0 | 0 | 1 | 0 | 13 | 2.5 | 15 |
| 0 | 0 | 0 | 0 | 1 | 0 | 14 | 2.5 | 15 |
| 0 | 0 | 0 | 0 | 1 | 0 | 15 | 2.5 | 15 |
| 0 | 0 | 0 | 0 | 1 | 0 | 16 | 2.5 | 15 |
| 0 | 0 | 0 | 0 | 1 | 0 | 17 | 2.5 | 15 |
| 0 | 0 | 0 | 0 | 1 | 0 | 18 | 2.5 | 15 |
| 0 | 0 | 0 | 0 | 1 | 0 | 19 | 2.5 | 15 |
| 0 | 0 | 0 | 0 | 1 | 0 | 20 | 2.5 | 15 |
| 0 | 0 | 0 | 0 | 1 | 0 | 21 | 2.5 | 15 |
| 0 | 0 | 0 | 0 | 1 | 0 | 22 | 2.5 | 15 |
| 0 | 0 | 0 | 0 | 1 | 0 | 23 | 2.5 | 15 |
| 0 | 0 | 0 | 0 | 1 | 0 | 24 | 2.5 | 15 |
| 0 | 0 | 0 | 0 | 1 | 0 | 25 | 2.5 | 15 |
| 0 | 0 | 0 | 0 | 1 | 0 | 26 | 2.5 | 15 |
| 0 | 0 | 0 | 0 | 1 | 0 | 27 | 2.5 | 15 |
| 0 | 0 | 0 | 0 | 1 | 0 | 28 | 2.5 | 15 |
| 0 | 0 | 0 | 0 | 1 | 0 | 29 | 2.5 | 15 |
| 0 | 0 | 0 | 0 | 1 | 0 | 30 | 2.5 | 30 |
| 0 | 0 | 0 | 0 | 1 | 0 | 31 | 2.5 | 45 |
| 0 | 0 | 0 | 0 | 1 | 0 | 32 | 2.5 | 45 |
| 0 | 0 | 0 | 0 | 1 | 0 | 33 | 2.5 | 45 |
| 0 | 0 | 0 | 0 | 1 | 0 | 34 | 2.5 | 45 |
| 0 | 0 | 0 | 0 | 1 | 0 | 35 | 2.5 | 45 |
| 0 | 0 | 0 | 0 | 1 | 0 | 36 | 2.5 | 45 |
| 0 | 0 | 0 | 0 | 1 | 0 | 37 | 2.5 | 45 |
| 0 | 0 | 0 | 0 | 1 | 0 | 38 | 2.5 | 45 |
| 0 | 0 | 0 | 0 | 1 | 0 | 39 | 2.5 | 45 |
| 0 | 0 | 0 | 0 | 1 | 0 | 40 | 2.5 | 45 |
| 0 | 0 | 0 | 0 | 1 | 0 | 41 | 2.5 | 45 |
| 0 | 0 | 0 | 0 | 1 | 0 | 42 | 2.5 | 45 |
| 0 | 0 | 0 | 0 | 1 | 0 | 43 | 2.5 | 45 |
| 0 | 0 | 0 | 0 | 1 | 0 | 44 | 2.5 | 45 |
| 0 | 0 | 0 | 0 | 1 | 0 | 45 | 2.5 | 45 |
| 0 | 0 | 0 | 0 | 1 | 0 | 46 | 2.5 | 45 |
| 0 | 0 | 0 | 0 | 1 | 0 | 47 | 2.5 | 45 |
| 0 | 0 | 0 | 0 | 1 | 0 | 48 | 2.5 | 45 |
| 0 | 0 | 0 | 0 | 1 | 0 | 49 | 2.5 | 45 |
| 0 | 0 | 0 | 0 | 1 | 0 | 50 | 2.5 | 45 |
| 0 | 0 | 0 | 0 | 1 | 0 | 51 | 2.5 | 45 |
| 0 | 0 | 0 | 0 | 1 | 0 | 52 | 2.5 | 45 |
| 0 | 0 | 0 | 0 | 1 | 0 | 53 | 2.5 | 45 |
| 0 | 0 | 0 | 0 | 1 | 0 | 54 | 2.5 | 45 |
| 0 | 0 | 0 | 0 | 1 | 0 | 55 | 2.5 | 45 |
| 0 | 0 | 0 | 0 | 1 | 0 | 56 | 2.5 | 45 |

|   |   |   |   |   |   |     |     |     |
|---|---|---|---|---|---|-----|-----|-----|
| 0 | 0 | 0 | 0 | 1 | 0 | 57  | 2.5 | 45  |
| 0 | 0 | 0 | 0 | 1 | 0 | 58  | 2.5 | 45  |
| 0 | 0 | 0 | 0 | 1 | 0 | 59  | 2.5 | 45  |
| 0 | 0 | 0 | 0 | 1 | 0 | 60  | 2.5 | 60  |
| 0 | 0 | 0 | 0 | 1 | 0 | 61  | 2.5 | 75  |
| 0 | 0 | 0 | 0 | 1 | 0 | 62  | 2.5 | 75  |
| 0 | 0 | 0 | 0 | 1 | 0 | 63  | 2.5 | 75  |
| 0 | 0 | 0 | 0 | 1 | 0 | 64  | 2.5 | 75  |
| 0 | 0 | 0 | 0 | 1 | 0 | 65  | 2.5 | 75  |
| 0 | 0 | 0 | 0 | 1 | 0 | 66  | 2.5 | 75  |
| 0 | 0 | 0 | 0 | 1 | 0 | 67  | 2.5 | 75  |
| 0 | 0 | 0 | 0 | 1 | 0 | 68  | 2.5 | 75  |
| 0 | 0 | 0 | 0 | 1 | 0 | 69  | 2.5 | 75  |
| 0 | 0 | 0 | 0 | 1 | 0 | 70  | 2.5 | 75  |
| 0 | 0 | 0 | 0 | 1 | 0 | 71  | 2.5 | 75  |
| 0 | 0 | 0 | 0 | 1 | 0 | 72  | 2.5 | 75  |
| 0 | 0 | 0 | 0 | 1 | 0 | 73  | 2.5 | 75  |
| 0 | 0 | 0 | 0 | 1 | 0 | 74  | 2.5 | 75  |
| 0 | 0 | 0 | 0 | 1 | 0 | 75  | 2.5 | 75  |
| 0 | 0 | 0 | 0 | 1 | 0 | 76  | 2.5 | 75  |
| 0 | 0 | 0 | 0 | 1 | 0 | 77  | 2.5 | 75  |
| 0 | 0 | 0 | 0 | 1 | 0 | 78  | 2.5 | 75  |
| 0 | 0 | 0 | 0 | 1 | 0 | 79  | 2.5 | 75  |
| 0 | 0 | 0 | 0 | 1 | 0 | 80  | 2.5 | 75  |
| 0 | 0 | 0 | 0 | 1 | 0 | 81  | 2.5 | 75  |
| 0 | 0 | 0 | 0 | 1 | 0 | 82  | 2.5 | 75  |
| 0 | 0 | 0 | 0 | 1 | 0 | 83  | 2.5 | 75  |
| 0 | 0 | 0 | 0 | 1 | 0 | 84  | 2.5 | 75  |
| 0 | 0 | 0 | 0 | 1 | 0 | 85  | 2.5 | 75  |
| 0 | 0 | 0 | 0 | 1 | 0 | 86  | 2.5 | 75  |
| 0 | 0 | 0 | 0 | 1 | 0 | 87  | 2.5 | 75  |
| 0 | 0 | 0 | 0 | 1 | 0 | 88  | 2.5 | 75  |
| 0 | 0 | 0 | 0 | 1 | 0 | 89  | 2.5 | 75  |
| 0 | 0 | 0 | 0 | 1 | 0 | 90  | 2.5 | 90  |
| 0 | 0 | 0 | 0 | 1 | 0 | 91  | 2.5 | 105 |
| 0 | 0 | 0 | 0 | 1 | 0 | 92  | 2.5 | 105 |
| 0 | 0 | 0 | 0 | 1 | 0 | 93  | 2.5 | 105 |
| 0 | 0 | 0 | 0 | 1 | 0 | 94  | 2.5 | 105 |
| 0 | 0 | 0 | 0 | 1 | 0 | 95  | 2.5 | 105 |
| 0 | 0 | 0 | 0 | 1 | 0 | 96  | 2.5 | 105 |
| 0 | 0 | 0 | 0 | 1 | 0 | 97  | 2.5 | 105 |
| 0 | 0 | 0 | 0 | 1 | 0 | 98  | 2.5 | 105 |
| 0 | 0 | 0 | 0 | 1 | 0 | 99  | 2.5 | 105 |
| 0 | 0 | 0 | 0 | 1 | 0 | 100 | 2.5 | 105 |
| 0 | 0 | 0 | 0 | 1 | 0 | 101 | 2.5 | 105 |
| 0 | 0 | 0 | 0 | 1 | 0 | 102 | 2.5 | 105 |

|   |   |   |   |   |   |     |     |     |
|---|---|---|---|---|---|-----|-----|-----|
| 0 | 0 | 0 | 0 | 1 | 0 | 103 | 2.5 | 105 |
| 0 | 0 | 0 | 0 | 1 | 0 | 104 | 2.5 | 105 |
| 0 | 0 | 0 | 0 | 1 | 0 | 105 | 2.5 | 105 |
| 0 | 0 | 0 | 0 | 1 | 0 | 106 | 2.5 | 105 |
| 0 | 0 | 0 | 0 | 1 | 0 | 107 | 2.5 | 105 |
| 0 | 0 | 0 | 0 | 1 | 0 | 108 | 2.5 | 105 |
| 0 | 0 | 0 | 0 | 1 | 0 | 109 | 2.5 | 105 |
| 0 | 0 | 0 | 0 | 1 | 0 | 110 | 2.5 | 105 |
| 0 | 0 | 0 | 0 | 1 | 0 | 111 | 2.5 | 105 |
| 0 | 0 | 0 | 0 | 1 | 0 | 112 | 2.5 | 105 |
| 0 | 0 | 0 | 0 | 1 | 0 | 113 | 2.5 | 105 |
| 0 | 0 | 0 | 0 | 1 | 0 | 114 | 2.5 | 105 |
| 0 | 0 | 0 | 0 | 1 | 0 | 115 | 2.5 | 105 |
| 0 | 0 | 0 | 0 | 1 | 0 | 116 | 2.5 | 105 |
| 0 | 0 | 0 | 0 | 1 | 0 | 117 | 2.5 | 105 |
| 0 | 0 | 0 | 0 | 1 | 0 | 118 | 2.5 | 105 |
| 0 | 0 | 0 | 0 | 1 | 0 | 119 | 2.5 | 105 |
| 0 | 0 | 0 | 0 | 1 | 0 | 151 | 2.5 | 165 |
| 0 | 0 | 0 | 0 | 1 | 0 | 152 | 2.5 | 165 |
| 0 | 0 | 0 | 0 | 1 | 0 | 153 | 2.5 | 165 |
| 0 | 0 | 0 | 0 | 1 | 0 | 154 | 2.5 | 165 |
| 0 | 0 | 0 | 0 | 1 | 0 | 155 | 2.5 | 165 |
| 0 | 0 | 0 | 0 | 1 | 0 | 156 | 2.5 | 165 |
| 0 | 0 | 0 | 0 | 1 | 0 | 157 | 2.5 | 165 |
| 0 | 0 | 0 | 0 | 1 | 0 | 158 | 2.5 | 165 |
| 0 | 0 | 0 | 0 | 1 | 0 | 159 | 2.5 | 165 |
| 0 | 0 | 0 | 0 | 1 | 0 | 160 | 2.5 | 165 |
| 0 | 0 | 0 | 0 | 1 | 0 | 161 | 2.5 | 165 |
| 0 | 0 | 0 | 0 | 1 | 0 | 162 | 2.5 | 165 |
| 0 | 0 | 0 | 0 | 1 | 0 | 163 | 2.5 | 165 |
| 0 | 0 | 0 | 0 | 1 | 0 | 164 | 2.5 | 165 |
| 0 | 0 | 0 | 0 | 1 | 0 | 165 | 2.5 | 165 |
| 0 | 0 | 0 | 0 | 1 | 0 | 166 | 2.5 | 165 |
| 0 | 0 | 0 | 0 | 1 | 0 | 167 | 2.5 | 165 |
| 0 | 0 | 0 | 0 | 1 | 0 | 168 | 2.5 | 165 |
| 0 | 0 | 0 | 0 | 1 | 0 | 169 | 2.5 | 165 |
| 0 | 0 | 0 | 0 | 1 | 0 | 170 | 2.5 | 165 |
| 0 | 0 | 0 | 0 | 1 | 0 | 171 | 2.5 | 165 |
| 0 | 0 | 0 | 0 | 1 | 0 | 172 | 2.5 | 165 |
| 0 | 0 | 0 | 0 | 1 | 0 | 173 | 2.5 | 165 |
| 0 | 0 | 0 | 0 | 1 | 0 | 174 | 2.5 | 165 |
| 0 | 0 | 0 | 0 | 1 | 0 | 175 | 2.5 | 165 |
| 0 | 0 | 0 | 0 | 1 | 0 | 176 | 2.5 | 165 |
| 0 | 0 | 0 | 0 | 1 | 0 | 177 | 2.5 | 165 |
| 0 | 0 | 0 | 0 | 1 | 0 | 178 | 2.5 | 165 |
| 0 | 0 | 0 | 0 | 1 | 0 | 179 | 2.5 | 165 |

|   |   |   |   |   |   |     |     |     |
|---|---|---|---|---|---|-----|-----|-----|
| 0 | 0 | 0 | 0 | 1 | 0 | 180 | 2.5 | 180 |
| 0 | 0 | 0 | 0 | 0 | 1 | 0   | 2.5 | 0   |
| 0 | 0 | 0 | 0 | 0 | 1 | 1   | 2.5 | 15  |
| 0 | 0 | 0 | 0 | 0 | 1 | 2   | 2.5 | 15  |
| 0 | 0 | 0 | 0 | 0 | 1 | 3   | 2.5 | 15  |
| 0 | 0 | 0 | 0 | 0 | 1 | 4   | 2.5 | 15  |
| 0 | 0 | 0 | 0 | 0 | 1 | 5   | 2.5 | 15  |
| 0 | 0 | 0 | 0 | 0 | 1 | 6   | 2.5 | 15  |
| 0 | 0 | 0 | 0 | 0 | 1 | 7   | 2.5 | 15  |
| 0 | 0 | 0 | 0 | 0 | 1 | 8   | 2.5 | 15  |
| 0 | 0 | 0 | 0 | 0 | 1 | 9   | 2.5 | 15  |
| 0 | 0 | 0 | 0 | 0 | 1 | 10  | 2.5 | 15  |
| 0 | 0 | 0 | 0 | 0 | 1 | 11  | 2.5 | 15  |
| 0 | 0 | 0 | 0 | 0 | 1 | 12  | 2.5 | 15  |
| 0 | 0 | 0 | 0 | 0 | 1 | 13  | 2.5 | 15  |
| 0 | 0 | 0 | 0 | 0 | 1 | 14  | 2.5 | 15  |
| 0 | 0 | 0 | 0 | 0 | 1 | 15  | 2.5 | 15  |
| 0 | 0 | 0 | 0 | 0 | 1 | 16  | 2.5 | 15  |
| 0 | 0 | 0 | 0 | 0 | 1 | 17  | 2.5 | 15  |
| 0 | 0 | 0 | 0 | 0 | 1 | 18  | 2.5 | 15  |
| 0 | 0 | 0 | 0 | 0 | 1 | 19  | 2.5 | 15  |
| 0 | 0 | 0 | 0 | 0 | 1 | 20  | 2.5 | 15  |
| 0 | 0 | 0 | 0 | 0 | 1 | 21  | 2.5 | 15  |
| 0 | 0 | 0 | 0 | 0 | 1 | 22  | 2.5 | 15  |
| 0 | 0 | 0 | 0 | 0 | 1 | 23  | 2.5 | 15  |
| 0 | 0 | 0 | 0 | 0 | 1 | 24  | 2.5 | 15  |
| 0 | 0 | 0 | 0 | 0 | 1 | 25  | 2.5 | 15  |
| 0 | 0 | 0 | 0 | 0 | 1 | 26  | 2.5 | 15  |
| 0 | 0 | 0 | 0 | 0 | 1 | 27  | 2.5 | 15  |
| 0 | 0 | 0 | 0 | 0 | 1 | 28  | 2.5 | 15  |
| 0 | 0 | 0 | 0 | 0 | 1 | 29  | 2.5 | 15  |
| 0 | 0 | 0 | 0 | 0 | 1 | 30  | 2.5 | 30  |
| 0 | 0 | 0 | 0 | 0 | 1 | 31  | 2.5 | 45  |
| 0 | 0 | 0 | 0 | 0 | 1 | 32  | 2.5 | 45  |
| 0 | 0 | 0 | 0 | 0 | 1 | 33  | 2.5 | 45  |
| 0 | 0 | 0 | 0 | 0 | 1 | 34  | 2.5 | 45  |
| 0 | 0 | 0 | 0 | 0 | 1 | 35  | 2.5 | 45  |
| 0 | 0 | 0 | 0 | 0 | 1 | 36  | 2.5 | 45  |
| 0 | 0 | 0 | 0 | 0 | 1 | 37  | 2.5 | 45  |
| 0 | 0 | 0 | 0 | 0 | 1 | 38  | 2.5 | 45  |
| 0 | 0 | 0 | 0 | 0 | 1 | 39  | 2.5 | 45  |
| 0 | 0 | 0 | 0 | 0 | 1 | 40  | 2.5 | 45  |
| 0 | 0 | 0 | 0 | 0 | 1 | 41  | 2.5 | 45  |
| 0 | 0 | 0 | 0 | 0 | 1 | 42  | 2.5 | 45  |
| 0 | 0 | 0 | 0 | 0 | 1 | 43  | 2.5 | 45  |
| 0 | 0 | 0 | 0 | 0 | 1 | 44  | 2.5 | 45  |

|   |   |   |   |   |   |    |     |    |
|---|---|---|---|---|---|----|-----|----|
| 0 | 0 | 0 | 0 | 0 | 1 | 45 | 2.5 | 45 |
| 0 | 0 | 0 | 0 | 0 | 1 | 46 | 2.5 | 45 |
| 0 | 0 | 0 | 0 | 0 | 1 | 47 | 2.5 | 45 |
| 0 | 0 | 0 | 0 | 0 | 1 | 48 | 2.5 | 45 |
| 0 | 0 | 0 | 0 | 0 | 1 | 49 | 2.5 | 45 |
| 0 | 0 | 0 | 0 | 0 | 1 | 50 | 2.5 | 45 |
| 0 | 0 | 0 | 0 | 0 | 1 | 51 | 2.5 | 45 |
| 0 | 0 | 0 | 0 | 0 | 1 | 52 | 2.5 | 45 |
| 0 | 0 | 0 | 0 | 0 | 1 | 53 | 2.5 | 45 |
| 0 | 0 | 0 | 0 | 0 | 1 | 54 | 2.5 | 45 |
| 0 | 0 | 0 | 0 | 0 | 1 | 55 | 2.5 | 45 |
| 0 | 0 | 0 | 0 | 0 | 1 | 56 | 2.5 | 45 |
| 0 | 0 | 0 | 0 | 0 | 1 | 57 | 2.5 | 45 |
| 0 | 0 | 0 | 0 | 0 | 1 | 58 | 2.5 | 45 |
| 0 | 0 | 0 | 0 | 0 | 1 | 59 | 2.5 | 45 |
| 0 | 0 | 0 | 0 | 0 | 1 | 60 | 2.5 | 60 |
| 0 | 0 | 0 | 0 | 0 | 1 | 61 | 2.5 | 75 |
| 0 | 0 | 0 | 0 | 0 | 1 | 62 | 2.5 | 75 |
| 0 | 0 | 0 | 0 | 0 | 1 | 63 | 2.5 | 75 |
| 0 | 0 | 0 | 0 | 0 | 1 | 64 | 2.5 | 75 |
| 0 | 0 | 0 | 0 | 0 | 1 | 65 | 2.5 | 75 |
| 0 | 0 | 0 | 0 | 0 | 1 | 66 | 2.5 | 75 |
| 0 | 0 | 0 | 0 | 0 | 1 | 67 | 2.5 | 75 |
| 0 | 0 | 0 | 0 | 0 | 1 | 68 | 2.5 | 75 |
| 0 | 0 | 0 | 0 | 0 | 1 | 69 | 2.5 | 75 |
| 0 | 0 | 0 | 0 | 0 | 1 | 70 | 2.5 | 75 |
| 0 | 0 | 0 | 0 | 0 | 1 | 71 | 2.5 | 75 |
| 0 | 0 | 0 | 0 | 0 | 1 | 72 | 2.5 | 75 |
| 0 | 0 | 0 | 0 | 0 | 1 | 73 | 2.5 | 75 |
| 0 | 0 | 0 | 0 | 0 | 1 | 74 | 2.5 | 75 |
| 0 | 0 | 0 | 0 | 0 | 1 | 75 | 2.5 | 75 |
| 0 | 0 | 0 | 0 | 0 | 1 | 76 | 2.5 | 75 |
| 0 | 0 | 0 | 0 | 0 | 1 | 77 | 2.5 | 75 |
| 0 | 0 | 0 | 0 | 0 | 1 | 78 | 2.5 | 75 |
| 0 | 0 | 0 | 0 | 0 | 1 | 79 | 2.5 | 75 |
| 0 | 0 | 0 | 0 | 0 | 1 | 80 | 2.5 | 75 |
| 0 | 0 | 0 | 0 | 0 | 1 | 81 | 2.5 | 75 |
| 0 | 0 | 0 | 0 | 0 | 1 | 82 | 2.5 | 75 |
| 0 | 0 | 0 | 0 | 0 | 1 | 83 | 2.5 | 75 |
| 0 | 0 | 0 | 0 | 0 | 1 | 84 | 2.5 | 75 |
| 0 | 0 | 0 | 0 | 0 | 1 | 85 | 2.5 | 75 |
| 0 | 0 | 0 | 0 | 0 | 1 | 86 | 2.5 | 75 |
| 0 | 0 | 0 | 0 | 0 | 1 | 87 | 2.5 | 75 |
| 0 | 0 | 0 | 0 | 0 | 1 | 88 | 2.5 | 75 |
| 0 | 0 | 0 | 0 | 0 | 1 | 89 | 2.5 | 75 |
| 0 | 0 | 0 | 0 | 0 | 1 | 90 | 2.5 | 90 |

|   |   |   |   |   |   |     |     |     |
|---|---|---|---|---|---|-----|-----|-----|
| 0 | 0 | 0 | 0 | 0 | 1 | 91  | 2.5 | 105 |
| 0 | 0 | 0 | 0 | 0 | 1 | 92  | 2.5 | 105 |
| 0 | 0 | 0 | 0 | 0 | 1 | 93  | 2.5 | 105 |
| 0 | 0 | 0 | 0 | 0 | 1 | 94  | 2.5 | 105 |
| 0 | 0 | 0 | 0 | 0 | 1 | 95  | 2.5 | 105 |
| 0 | 0 | 0 | 0 | 0 | 1 | 96  | 2.5 | 105 |
| 0 | 0 | 0 | 0 | 0 | 1 | 97  | 2.5 | 105 |
| 0 | 0 | 0 | 0 | 0 | 1 | 98  | 2.5 | 105 |
| 0 | 0 | 0 | 0 | 0 | 1 | 99  | 2.5 | 105 |
| 0 | 0 | 0 | 0 | 0 | 1 | 100 | 2.5 | 105 |
| 0 | 0 | 0 | 0 | 0 | 1 | 101 | 2.5 | 105 |
| 0 | 0 | 0 | 0 | 0 | 1 | 102 | 2.5 | 105 |
| 0 | 0 | 0 | 0 | 0 | 1 | 103 | 2.5 | 105 |
| 0 | 0 | 0 | 0 | 0 | 1 | 104 | 2.5 | 105 |
| 0 | 0 | 0 | 0 | 0 | 1 | 105 | 2.5 | 105 |
| 0 | 0 | 0 | 0 | 0 | 1 | 106 | 2.5 | 105 |
| 0 | 0 | 0 | 0 | 0 | 1 | 107 | 2.5 | 105 |
| 0 | 0 | 0 | 0 | 0 | 1 | 108 | 2.5 | 105 |
| 0 | 0 | 0 | 0 | 0 | 1 | 109 | 2.5 | 105 |
| 0 | 0 | 0 | 0 | 0 | 1 | 110 | 2.5 | 105 |
| 0 | 0 | 0 | 0 | 0 | 1 | 111 | 2.5 | 105 |
| 0 | 0 | 0 | 0 | 0 | 1 | 112 | 2.5 | 105 |
| 0 | 0 | 0 | 0 | 0 | 1 | 113 | 2.5 | 105 |
| 0 | 0 | 0 | 0 | 0 | 1 | 114 | 2.5 | 105 |
| 0 | 0 | 0 | 0 | 0 | 1 | 115 | 2.5 | 105 |
| 0 | 0 | 0 | 0 | 0 | 1 | 116 | 2.5 | 105 |
| 0 | 0 | 0 | 0 | 0 | 1 | 117 | 2.5 | 105 |
| 0 | 0 | 0 | 0 | 0 | 1 | 118 | 2.5 | 105 |
| 0 | 0 | 0 | 0 | 0 | 1 | 119 | 2.5 | 105 |
| 0 | 0 | 0 | 0 | 0 | 1 | 120 | 2.5 | 120 |
| 0 | 0 | 0 | 0 | 0 | 1 | 121 | 2.5 | 135 |
| 0 | 0 | 0 | 0 | 0 | 1 | 122 | 2.5 | 135 |
| 0 | 0 | 0 | 0 | 0 | 1 | 123 | 2.5 | 135 |
| 0 | 0 | 0 | 0 | 0 | 1 | 124 | 2.5 | 135 |
| 0 | 0 | 0 | 0 | 0 | 1 | 125 | 2.5 | 135 |
| 0 | 0 | 0 | 0 | 0 | 1 | 126 | 2.5 | 135 |
| 0 | 0 | 0 | 0 | 0 | 1 | 127 | 2.5 | 135 |
| 0 | 0 | 0 | 0 | 0 | 1 | 128 | 2.5 | 135 |
| 0 | 0 | 0 | 0 | 0 | 1 | 129 | 2.5 | 135 |
| 0 | 0 | 0 | 0 | 0 | 1 | 130 | 2.5 | 135 |
| 0 | 0 | 0 | 0 | 0 | 1 | 131 | 2.5 | 135 |
| 0 | 0 | 0 | 0 | 0 | 1 | 132 | 2.5 | 135 |
| 0 | 0 | 0 | 0 | 0 | 1 | 133 | 2.5 | 135 |
| 0 | 0 | 0 | 0 | 0 | 1 | 134 | 2.5 | 135 |
| 0 | 0 | 0 | 0 | 0 | 1 | 135 | 2.5 | 135 |
| 0 | 0 | 0 | 0 | 0 | 1 | 136 | 2.5 | 135 |

|   |   |   |   |   |   |     |     |     |
|---|---|---|---|---|---|-----|-----|-----|
| 0 | 0 | 0 | 0 | 0 | 1 | 137 | 2.5 | 135 |
| 0 | 0 | 0 | 0 | 0 | 1 | 138 | 2.5 | 135 |
| 0 | 0 | 0 | 0 | 0 | 1 | 139 | 2.5 | 135 |
| 0 | 0 | 0 | 0 | 0 | 1 | 140 | 2.5 | 135 |
| 0 | 0 | 0 | 0 | 0 | 1 | 141 | 2.5 | 135 |
| 0 | 0 | 0 | 0 | 0 | 1 | 142 | 2.5 | 135 |
| 0 | 0 | 0 | 0 | 0 | 1 | 143 | 2.5 | 135 |
| 0 | 0 | 0 | 0 | 0 | 1 | 144 | 2.5 | 135 |
| 0 | 0 | 0 | 0 | 0 | 1 | 145 | 2.5 | 135 |
| 0 | 0 | 0 | 0 | 0 | 1 | 146 | 2.5 | 135 |
| 0 | 0 | 0 | 0 | 0 | 1 | 147 | 2.5 | 135 |
| 0 | 0 | 0 | 0 | 0 | 1 | 148 | 2.5 | 135 |
| 0 | 0 | 0 | 0 | 0 | 1 | 149 | 2.5 | 135 |
| 1 | 1 | 0 | 0 | 0 | 0 | 61  | 2.5 | 75  |
| 1 | 1 | 0 | 0 | 0 | 0 | 62  | 2.5 | 75  |
| 1 | 1 | 0 | 0 | 0 | 0 | 63  | 2.5 | 75  |
| 1 | 1 | 0 | 0 | 0 | 0 | 64  | 2.5 | 75  |
| 1 | 1 | 0 | 0 | 0 | 0 | 65  | 2.5 | 75  |
| 1 | 1 | 0 | 0 | 0 | 0 | 66  | 2.5 | 75  |
| 1 | 1 | 0 | 0 | 0 | 0 | 67  | 2.5 | 75  |
| 1 | 1 | 0 | 0 | 0 | 0 | 68  | 2.5 | 75  |
| 1 | 1 | 0 | 0 | 0 | 0 | 69  | 2.5 | 75  |
| 1 | 1 | 0 | 0 | 0 | 0 | 70  | 2.5 | 75  |
| 1 | 1 | 0 | 0 | 0 | 0 | 71  | 2.5 | 75  |
| 1 | 1 | 0 | 0 | 0 | 0 | 72  | 2.5 | 75  |
| 1 | 1 | 0 | 0 | 0 | 0 | 73  | 2.5 | 75  |
| 1 | 1 | 0 | 0 | 0 | 0 | 74  | 2.5 | 75  |
| 1 | 1 | 0 | 0 | 0 | 0 | 75  | 2.5 | 75  |
| 1 | 1 | 0 | 0 | 0 | 0 | 76  | 2.5 | 75  |
| 1 | 1 | 0 | 0 | 0 | 0 | 77  | 2.5 | 75  |
| 1 | 1 | 0 | 0 | 0 | 0 | 78  | 2.5 | 75  |
| 1 | 1 | 0 | 0 | 0 | 0 | 79  | 2.5 | 75  |
| 1 | 1 | 0 | 0 | 0 | 0 | 80  | 2.5 | 75  |
| 1 | 1 | 0 | 0 | 0 | 0 | 81  | 2.5 | 75  |
| 1 | 1 | 0 | 0 | 0 | 0 | 82  | 2.5 | 75  |
| 1 | 1 | 0 | 0 | 0 | 0 | 83  | 2.5 | 75  |
| 1 | 1 | 0 | 0 | 0 | 0 | 84  | 2.5 | 75  |
| 1 | 1 | 0 | 0 | 0 | 0 | 85  | 2.5 | 75  |
| 1 | 1 | 0 | 0 | 0 | 0 | 86  | 2.5 | 75  |
| 1 | 1 | 0 | 0 | 0 | 0 | 87  | 2.5 | 75  |
| 1 | 1 | 0 | 0 | 0 | 0 | 88  | 2.5 | 75  |
| 1 | 1 | 0 | 0 | 0 | 0 | 89  | 2.5 | 75  |
| 1 | 1 | 0 | 0 | 0 | 0 | 90  | 2.5 | 90  |
| 1 | 1 | 0 | 0 | 0 | 0 | 91  | 2.5 | 105 |
| 1 | 1 | 0 | 0 | 0 | 0 | 92  | 2.5 | 105 |
| 1 | 1 | 0 | 0 | 0 | 0 | 93  | 2.5 | 105 |

|   |   |   |   |   |   |     |     |     |
|---|---|---|---|---|---|-----|-----|-----|
| 1 | 1 | 0 | 0 | 0 | 0 | 94  | 2.5 | 105 |
| 1 | 1 | 0 | 0 | 0 | 0 | 95  | 2.5 | 105 |
| 1 | 1 | 0 | 0 | 0 | 0 | 96  | 2.5 | 105 |
| 1 | 1 | 0 | 0 | 0 | 0 | 97  | 2.5 | 105 |
| 1 | 1 | 0 | 0 | 0 | 0 | 98  | 2.5 | 105 |
| 1 | 1 | 0 | 0 | 0 | 0 | 99  | 2.5 | 105 |
| 1 | 1 | 0 | 0 | 0 | 0 | 100 | 2.5 | 105 |
| 1 | 1 | 0 | 0 | 0 | 0 | 101 | 2.5 | 105 |
| 1 | 1 | 0 | 0 | 0 | 0 | 102 | 2.5 | 105 |
| 1 | 1 | 0 | 0 | 0 | 0 | 103 | 2.5 | 105 |
| 1 | 1 | 0 | 0 | 0 | 0 | 104 | 2.5 | 105 |
| 1 | 1 | 0 | 0 | 0 | 0 | 105 | 2.5 | 105 |
| 1 | 1 | 0 | 0 | 0 | 0 | 106 | 2.5 | 105 |
| 1 | 1 | 0 | 0 | 0 | 0 | 107 | 2.5 | 105 |
| 1 | 1 | 0 | 0 | 0 | 0 | 108 | 2.5 | 105 |
| 1 | 1 | 0 | 0 | 0 | 0 | 109 | 2.5 | 105 |
| 1 | 1 | 0 | 0 | 0 | 0 | 110 | 2.5 | 105 |
| 1 | 1 | 0 | 0 | 0 | 0 | 111 | 2.5 | 105 |
| 1 | 1 | 0 | 0 | 0 | 0 | 112 | 2.5 | 105 |
| 1 | 1 | 0 | 0 | 0 | 0 | 113 | 2.5 | 105 |
| 1 | 1 | 0 | 0 | 0 | 0 | 114 | 2.5 | 105 |
| 1 | 1 | 0 | 0 | 0 | 0 | 115 | 2.5 | 105 |
| 1 | 1 | 0 | 0 | 0 | 0 | 116 | 2.5 | 105 |
| 1 | 1 | 0 | 0 | 0 | 0 | 117 | 2.5 | 105 |
| 1 | 1 | 0 | 0 | 0 | 0 | 118 | 2.5 | 105 |
| 1 | 1 | 0 | 0 | 0 | 0 | 119 | 2.5 | 105 |
| 1 | 1 | 0 | 0 | 0 | 0 | 120 | 2.5 | 120 |
| 1 | 1 | 0 | 0 | 0 | 0 | 121 | 2.5 | 135 |
| 1 | 1 | 0 | 0 | 0 | 0 | 122 | 2.5 | 135 |
| 1 | 1 | 0 | 0 | 0 | 0 | 123 | 2.5 | 135 |
| 1 | 1 | 0 | 0 | 0 | 0 | 124 | 2.5 | 135 |
| 1 | 1 | 0 | 0 | 0 | 0 | 125 | 2.5 | 135 |
| 1 | 1 | 0 | 0 | 0 | 0 | 126 | 2.5 | 135 |
| 1 | 1 | 0 | 0 | 0 | 0 | 127 | 2.5 | 135 |
| 1 | 1 | 0 | 0 | 0 | 0 | 128 | 2.5 | 135 |
| 1 | 1 | 0 | 0 | 0 | 0 | 129 | 2.5 | 135 |
| 1 | 1 | 0 | 0 | 0 | 0 | 130 | 2.5 | 135 |
| 1 | 1 | 0 | 0 | 0 | 0 | 131 | 2.5 | 135 |
| 1 | 1 | 0 | 0 | 0 | 0 | 132 | 2.5 | 135 |
| 1 | 1 | 0 | 0 | 0 | 0 | 133 | 2.5 | 135 |
| 1 | 1 | 0 | 0 | 0 | 0 | 134 | 2.5 | 135 |
| 1 | 1 | 0 | 0 | 0 | 0 | 135 | 2.5 | 135 |
| 1 | 1 | 0 | 0 | 0 | 0 | 136 | 2.5 | 135 |
| 1 | 1 | 0 | 0 | 0 | 0 | 137 | 2.5 | 135 |
| 1 | 1 | 0 | 0 | 0 | 0 | 138 | 2.5 | 135 |
| 1 | 1 | 0 | 0 | 0 | 0 | 139 | 2.5 | 135 |

|   |   |   |   |   |   |     |     |     |
|---|---|---|---|---|---|-----|-----|-----|
| 1 | 1 | 0 | 0 | 0 | 0 | 140 | 2.5 | 135 |
| 1 | 1 | 0 | 0 | 0 | 0 | 141 | 2.5 | 135 |
| 1 | 1 | 0 | 0 | 0 | 0 | 142 | 2.5 | 135 |
| 1 | 1 | 0 | 0 | 0 | 0 | 143 | 2.5 | 135 |
| 1 | 1 | 0 | 0 | 0 | 0 | 144 | 2.5 | 135 |
| 1 | 1 | 0 | 0 | 0 | 0 | 145 | 2.5 | 135 |
| 1 | 1 | 0 | 0 | 0 | 0 | 146 | 2.5 | 135 |
| 1 | 1 | 0 | 0 | 0 | 0 | 147 | 2.5 | 135 |
| 1 | 1 | 0 | 0 | 0 | 0 | 148 | 2.5 | 135 |
| 1 | 1 | 0 | 0 | 0 | 0 | 149 | 2.5 | 135 |
| 1 | 1 | 0 | 0 | 0 | 0 | 150 | 2.5 | 150 |
| 1 | 1 | 0 | 0 | 0 | 0 | 151 | 2.5 | 165 |
| 1 | 1 | 0 | 0 | 0 | 0 | 152 | 2.5 | 165 |
| 1 | 1 | 0 | 0 | 0 | 0 | 153 | 2.5 | 165 |
| 1 | 1 | 0 | 0 | 0 | 0 | 154 | 2.5 | 165 |
| 1 | 1 | 0 | 0 | 0 | 0 | 155 | 2.5 | 165 |
| 1 | 1 | 0 | 0 | 0 | 0 | 156 | 2.5 | 165 |
| 1 | 1 | 0 | 0 | 0 | 0 | 157 | 2.5 | 165 |
| 1 | 1 | 0 | 0 | 0 | 0 | 158 | 2.5 | 165 |
| 1 | 1 | 0 | 0 | 0 | 0 | 159 | 2.5 | 165 |
| 1 | 1 | 0 | 0 | 0 | 0 | 160 | 2.5 | 165 |
| 1 | 1 | 0 | 0 | 0 | 0 | 161 | 2.5 | 165 |
| 1 | 1 | 0 | 0 | 0 | 0 | 162 | 2.5 | 165 |
| 1 | 1 | 0 | 0 | 0 | 0 | 163 | 2.5 | 165 |
| 1 | 1 | 0 | 0 | 0 | 0 | 164 | 2.5 | 165 |
| 1 | 1 | 0 | 0 | 0 | 0 | 165 | 2.5 | 165 |
| 1 | 1 | 0 | 0 | 0 | 0 | 166 | 2.5 | 165 |
| 1 | 1 | 0 | 0 | 0 | 0 | 167 | 2.5 | 165 |
| 1 | 1 | 0 | 0 | 0 | 0 | 168 | 2.5 | 165 |
| 1 | 1 | 0 | 0 | 0 | 0 | 169 | 2.5 | 165 |
| 1 | 1 | 0 | 0 | 0 | 0 | 170 | 2.5 | 165 |
| 1 | 1 | 0 | 0 | 0 | 0 | 171 | 2.5 | 165 |
| 1 | 1 | 0 | 0 | 0 | 0 | 172 | 2.5 | 165 |
| 1 | 1 | 0 | 0 | 0 | 0 | 173 | 2.5 | 165 |
| 1 | 1 | 0 | 0 | 0 | 0 | 174 | 2.5 | 165 |
| 1 | 1 | 0 | 0 | 0 | 0 | 175 | 2.5 | 165 |
| 1 | 1 | 0 | 0 | 0 | 0 | 176 | 2.5 | 165 |
| 1 | 1 | 0 | 0 | 0 | 0 | 177 | 2.5 | 165 |
| 1 | 1 | 0 | 0 | 0 | 0 | 178 | 2.5 | 165 |
| 1 | 1 | 0 | 0 | 0 | 0 | 179 | 2.5 | 165 |
| 1 | 1 | 0 | 0 | 0 | 0 | 180 | 2.5 | 180 |
| 1 | 0 | 1 | 0 | 0 | 0 | 31  | 2.5 | 45  |
| 1 | 0 | 1 | 0 | 0 | 0 | 32  | 2.5 | 45  |
| 1 | 0 | 1 | 0 | 0 | 0 | 33  | 2.5 | 45  |
| 1 | 0 | 1 | 0 | 0 | 0 | 34  | 2.5 | 45  |
| 1 | 0 | 1 | 0 | 0 | 0 | 35  | 2.5 | 45  |

|   |   |   |   |   |   |     |     |     |
|---|---|---|---|---|---|-----|-----|-----|
| 1 | 0 | 1 | 0 | 0 | 0 | 36  | 2.5 | 45  |
| 1 | 0 | 1 | 0 | 0 | 0 | 37  | 2.5 | 45  |
| 1 | 0 | 1 | 0 | 0 | 0 | 38  | 2.5 | 45  |
| 1 | 0 | 1 | 0 | 0 | 0 | 39  | 2.5 | 45  |
| 1 | 0 | 1 | 0 | 0 | 0 | 40  | 2.5 | 45  |
| 1 | 0 | 1 | 0 | 0 | 0 | 41  | 2.5 | 45  |
| 1 | 0 | 1 | 0 | 0 | 0 | 42  | 2.5 | 45  |
| 1 | 0 | 1 | 0 | 0 | 0 | 43  | 2.5 | 45  |
| 1 | 0 | 1 | 0 | 0 | 0 | 44  | 2.5 | 45  |
| 1 | 0 | 1 | 0 | 0 | 0 | 45  | 2.5 | 45  |
| 1 | 0 | 1 | 0 | 0 | 0 | 46  | 2.5 | 45  |
| 1 | 0 | 1 | 0 | 0 | 0 | 47  | 2.5 | 45  |
| 1 | 0 | 1 | 0 | 0 | 0 | 48  | 2.5 | 45  |
| 1 | 0 | 1 | 0 | 0 | 0 | 49  | 2.5 | 45  |
| 1 | 0 | 1 | 0 | 0 | 0 | 50  | 2.5 | 45  |
| 1 | 0 | 1 | 0 | 0 | 0 | 51  | 2.5 | 45  |
| 1 | 0 | 1 | 0 | 0 | 0 | 52  | 2.5 | 45  |
| 1 | 0 | 1 | 0 | 0 | 0 | 53  | 2.5 | 45  |
| 1 | 0 | 1 | 0 | 0 | 0 | 54  | 2.5 | 45  |
| 1 | 0 | 1 | 0 | 0 | 0 | 55  | 2.5 | 45  |
| 1 | 0 | 1 | 0 | 0 | 0 | 56  | 2.5 | 45  |
| 1 | 0 | 1 | 0 | 0 | 0 | 57  | 2.5 | 45  |
| 1 | 0 | 1 | 0 | 0 | 0 | 58  | 2.5 | 45  |
| 1 | 0 | 1 | 0 | 0 | 0 | 59  | 2.5 | 45  |
| 1 | 0 | 1 | 0 | 0 | 0 | 91  | 2.5 | 105 |
| 1 | 0 | 1 | 0 | 0 | 0 | 92  | 2.5 | 105 |
| 1 | 0 | 1 | 0 | 0 | 0 | 93  | 2.5 | 105 |
| 1 | 0 | 1 | 0 | 0 | 0 | 94  | 2.5 | 105 |
| 1 | 0 | 1 | 0 | 0 | 0 | 95  | 2.5 | 105 |
| 1 | 0 | 1 | 0 | 0 | 0 | 96  | 2.5 | 105 |
| 1 | 0 | 1 | 0 | 0 | 0 | 97  | 2.5 | 105 |
| 1 | 0 | 1 | 0 | 0 | 0 | 98  | 2.5 | 105 |
| 1 | 0 | 1 | 0 | 0 | 0 | 99  | 2.5 | 105 |
| 1 | 0 | 1 | 0 | 0 | 0 | 100 | 2.5 | 105 |
| 1 | 0 | 1 | 0 | 0 | 0 | 101 | 2.5 | 105 |
| 1 | 0 | 1 | 0 | 0 | 0 | 102 | 2.5 | 105 |
| 1 | 0 | 1 | 0 | 0 | 0 | 103 | 2.5 | 105 |
| 1 | 0 | 1 | 0 | 0 | 0 | 104 | 2.5 | 105 |
| 1 | 0 | 1 | 0 | 0 | 0 | 105 | 2.5 | 105 |
| 1 | 0 | 1 | 0 | 0 | 0 | 106 | 2.5 | 105 |
| 1 | 0 | 1 | 0 | 0 | 0 | 107 | 2.5 | 105 |
| 1 | 0 | 1 | 0 | 0 | 0 | 108 | 2.5 | 105 |
| 1 | 0 | 1 | 0 | 0 | 0 | 109 | 2.5 | 105 |
| 1 | 0 | 1 | 0 | 0 | 0 | 110 | 2.5 | 105 |
| 1 | 0 | 1 | 0 | 0 | 0 | 111 | 2.5 | 105 |
| 1 | 0 | 1 | 0 | 0 | 0 | 112 | 2.5 | 105 |
| 1 | 0 | 1 | 0 | 0 | 0 | 113 | 2.5 | 105 |

|   |   |   |   |   |   |     |     |     |
|---|---|---|---|---|---|-----|-----|-----|
| 1 | 0 | 1 | 0 | 0 | 0 | 114 | 2.5 | 105 |
| 1 | 0 | 1 | 0 | 0 | 0 | 115 | 2.5 | 105 |
| 1 | 0 | 1 | 0 | 0 | 0 | 116 | 2.5 | 105 |
| 1 | 0 | 1 | 0 | 0 | 0 | 117 | 2.5 | 105 |
| 1 | 0 | 1 | 0 | 0 | 0 | 118 | 2.5 | 105 |
| 1 | 0 | 1 | 0 | 0 | 0 | 119 | 2.5 | 105 |
| 1 | 0 | 1 | 0 | 0 | 0 | 120 | 2.5 | 120 |
| 1 | 0 | 1 | 0 | 0 | 0 | 121 | 2.5 | 135 |
| 1 | 0 | 1 | 0 | 0 | 0 | 122 | 2.5 | 135 |
| 1 | 0 | 1 | 0 | 0 | 0 | 123 | 2.5 | 135 |
| 1 | 0 | 1 | 0 | 0 | 0 | 124 | 2.5 | 135 |
| 1 | 0 | 1 | 0 | 0 | 0 | 125 | 2.5 | 135 |
| 1 | 0 | 1 | 0 | 0 | 0 | 126 | 2.5 | 135 |
| 1 | 0 | 1 | 0 | 0 | 0 | 127 | 2.5 | 135 |
| 1 | 0 | 1 | 0 | 0 | 0 | 128 | 2.5 | 135 |
| 1 | 0 | 1 | 0 | 0 | 0 | 129 | 2.5 | 135 |
| 1 | 0 | 1 | 0 | 0 | 0 | 130 | 2.5 | 135 |
| 1 | 0 | 1 | 0 | 0 | 0 | 131 | 2.5 | 135 |
| 1 | 0 | 1 | 0 | 0 | 0 | 132 | 2.5 | 135 |
| 1 | 0 | 1 | 0 | 0 | 0 | 133 | 2.5 | 135 |
| 1 | 0 | 1 | 0 | 0 | 0 | 134 | 2.5 | 135 |
| 1 | 0 | 1 | 0 | 0 | 0 | 135 | 2.5 | 135 |
| 1 | 0 | 1 | 0 | 0 | 0 | 136 | 2.5 | 135 |
| 1 | 0 | 1 | 0 | 0 | 0 | 137 | 2.5 | 135 |
| 1 | 0 | 1 | 0 | 0 | 0 | 138 | 2.5 | 135 |
| 1 | 0 | 1 | 0 | 0 | 0 | 139 | 2.5 | 135 |
| 1 | 0 | 1 | 0 | 0 | 0 | 140 | 2.5 | 135 |
| 1 | 0 | 1 | 0 | 0 | 0 | 141 | 2.5 | 135 |
| 1 | 0 | 1 | 0 | 0 | 0 | 142 | 2.5 | 135 |
| 1 | 0 | 1 | 0 | 0 | 0 | 143 | 2.5 | 135 |
| 1 | 0 | 1 | 0 | 0 | 0 | 144 | 2.5 | 135 |
| 1 | 0 | 1 | 0 | 0 | 0 | 145 | 2.5 | 135 |
| 1 | 0 | 1 | 0 | 0 | 0 | 146 | 2.5 | 135 |
| 1 | 0 | 1 | 0 | 0 | 0 | 147 | 2.5 | 135 |
| 1 | 0 | 1 | 0 | 0 | 0 | 148 | 2.5 | 135 |
| 1 | 0 | 1 | 0 | 0 | 0 | 149 | 2.5 | 135 |
| 1 | 0 | 1 | 0 | 0 | 0 | 150 | 2.5 | 150 |
| 1 | 0 | 1 | 0 | 0 | 0 | 151 | 2.5 | 165 |
| 1 | 0 | 1 | 0 | 0 | 0 | 152 | 2.5 | 165 |
| 1 | 0 | 1 | 0 | 0 | 0 | 153 | 2.5 | 165 |
| 1 | 0 | 1 | 0 | 0 | 0 | 154 | 2.5 | 165 |
| 1 | 0 | 1 | 0 | 0 | 0 | 155 | 2.5 | 165 |
| 1 | 0 | 1 | 0 | 0 | 0 | 156 | 2.5 | 165 |
| 1 | 0 | 1 | 0 | 0 | 0 | 157 | 2.5 | 165 |
| 1 | 0 | 1 | 0 | 0 | 0 | 158 | 2.5 | 165 |
| 1 | 0 | 1 | 0 | 0 | 0 | 159 | 2.5 | 165 |

|   |   |   |   |   |   |     |     |     |
|---|---|---|---|---|---|-----|-----|-----|
| 1 | 0 | 1 | 0 | 0 | 0 | 160 | 2.5 | 165 |
| 1 | 0 | 1 | 0 | 0 | 0 | 161 | 2.5 | 165 |
| 1 | 0 | 1 | 0 | 0 | 0 | 162 | 2.5 | 165 |
| 1 | 0 | 1 | 0 | 0 | 0 | 163 | 2.5 | 165 |
| 1 | 0 | 1 | 0 | 0 | 0 | 164 | 2.5 | 165 |
| 1 | 0 | 1 | 0 | 0 | 0 | 165 | 2.5 | 165 |
| 1 | 0 | 1 | 0 | 0 | 0 | 166 | 2.5 | 165 |
| 1 | 0 | 1 | 0 | 0 | 0 | 167 | 2.5 | 165 |
| 1 | 0 | 1 | 0 | 0 | 0 | 168 | 2.5 | 165 |
| 1 | 0 | 1 | 0 | 0 | 0 | 169 | 2.5 | 165 |
| 1 | 0 | 1 | 0 | 0 | 0 | 170 | 2.5 | 165 |
| 1 | 0 | 1 | 0 | 0 | 0 | 171 | 2.5 | 165 |
| 1 | 0 | 1 | 0 | 0 | 0 | 172 | 2.5 | 165 |
| 1 | 0 | 1 | 0 | 0 | 0 | 173 | 2.5 | 165 |
| 1 | 0 | 1 | 0 | 0 | 0 | 174 | 2.5 | 165 |
| 1 | 0 | 1 | 0 | 0 | 0 | 175 | 2.5 | 165 |
| 1 | 0 | 1 | 0 | 0 | 0 | 176 | 2.5 | 165 |
| 1 | 0 | 1 | 0 | 0 | 0 | 177 | 2.5 | 165 |
| 1 | 0 | 1 | 0 | 0 | 0 | 178 | 2.5 | 165 |
| 1 | 0 | 1 | 0 | 0 | 0 | 179 | 2.5 | 165 |
| 1 | 0 | 1 | 0 | 0 | 0 | 180 | 2.5 | 180 |
| 1 | 0 | 0 | 1 | 0 | 0 | 31  | 2.5 | 45  |
| 1 | 0 | 0 | 1 | 0 | 0 | 32  | 2.5 | 45  |
| 1 | 0 | 0 | 1 | 0 | 0 | 33  | 2.5 | 45  |
| 1 | 0 | 0 | 1 | 0 | 0 | 34  | 2.5 | 45  |
| 1 | 0 | 0 | 1 | 0 | 0 | 35  | 2.5 | 45  |
| 1 | 0 | 0 | 1 | 0 | 0 | 36  | 2.5 | 45  |
| 1 | 0 | 0 | 1 | 0 | 0 | 37  | 2.5 | 45  |
| 1 | 0 | 0 | 1 | 0 | 0 | 38  | 2.5 | 45  |
| 1 | 0 | 0 | 1 | 0 | 0 | 39  | 2.5 | 45  |
| 1 | 0 | 0 | 1 | 0 | 0 | 40  | 2.5 | 45  |
| 1 | 0 | 0 | 1 | 0 | 0 | 41  | 2.5 | 45  |
| 1 | 0 | 0 | 1 | 0 | 0 | 42  | 2.5 | 45  |
| 1 | 0 | 0 | 1 | 0 | 0 | 43  | 2.5 | 45  |
| 1 | 0 | 0 | 1 | 0 | 0 | 44  | 2.5 | 45  |
| 1 | 0 | 0 | 1 | 0 | 0 | 45  | 2.5 | 45  |
| 1 | 0 | 0 | 1 | 0 | 0 | 46  | 2.5 | 45  |
| 1 | 0 | 0 | 1 | 0 | 0 | 47  | 2.5 | 45  |
| 1 | 0 | 0 | 1 | 0 | 0 | 48  | 2.5 | 45  |
| 1 | 0 | 0 | 1 | 0 | 0 | 49  | 2.5 | 45  |
| 1 | 0 | 0 | 1 | 0 | 0 | 50  | 2.5 | 45  |
| 1 | 0 | 0 | 1 | 0 | 0 | 51  | 2.5 | 45  |
| 1 | 0 | 0 | 1 | 0 | 0 | 52  | 2.5 | 45  |
| 1 | 0 | 0 | 1 | 0 | 0 | 53  | 2.5 | 45  |
| 1 | 0 | 0 | 1 | 0 | 0 | 54  | 2.5 | 45  |
| 1 | 0 | 0 | 1 | 0 | 0 | 55  | 2.5 | 45  |

|   |   |   |   |   |   |     |     |     |
|---|---|---|---|---|---|-----|-----|-----|
| 1 | 0 | 0 | 1 | 0 | 0 | 56  | 2.5 | 45  |
| 1 | 0 | 0 | 1 | 0 | 0 | 57  | 2.5 | 45  |
| 1 | 0 | 0 | 1 | 0 | 0 | 58  | 2.5 | 45  |
| 1 | 0 | 0 | 1 | 0 | 0 | 59  | 2.5 | 45  |
| 1 | 0 | 0 | 1 | 0 | 0 | 60  | 2.5 | 60  |
| 1 | 0 | 0 | 1 | 0 | 0 | 61  | 2.5 | 75  |
| 1 | 0 | 0 | 1 | 0 | 0 | 62  | 2.5 | 75  |
| 1 | 0 | 0 | 1 | 0 | 0 | 63  | 2.5 | 75  |
| 1 | 0 | 0 | 1 | 0 | 0 | 64  | 2.5 | 75  |
| 1 | 0 | 0 | 1 | 0 | 0 | 65  | 2.5 | 75  |
| 1 | 0 | 0 | 1 | 0 | 0 | 66  | 2.5 | 75  |
| 1 | 0 | 0 | 1 | 0 | 0 | 67  | 2.5 | 75  |
| 1 | 0 | 0 | 1 | 0 | 0 | 68  | 2.5 | 75  |
| 1 | 0 | 0 | 1 | 0 | 0 | 69  | 2.5 | 75  |
| 1 | 0 | 0 | 1 | 0 | 0 | 70  | 2.5 | 75  |
| 1 | 0 | 0 | 1 | 0 | 0 | 71  | 2.5 | 75  |
| 1 | 0 | 0 | 1 | 0 | 0 | 72  | 2.5 | 75  |
| 1 | 0 | 0 | 1 | 0 | 0 | 73  | 2.5 | 75  |
| 1 | 0 | 0 | 1 | 0 | 0 | 74  | 2.5 | 75  |
| 1 | 0 | 0 | 1 | 0 | 0 | 75  | 2.5 | 75  |
| 1 | 0 | 0 | 1 | 0 | 0 | 76  | 2.5 | 75  |
| 1 | 0 | 0 | 1 | 0 | 0 | 77  | 2.5 | 75  |
| 1 | 0 | 0 | 1 | 0 | 0 | 78  | 2.5 | 75  |
| 1 | 0 | 0 | 1 | 0 | 0 | 79  | 2.5 | 75  |
| 1 | 0 | 0 | 1 | 0 | 0 | 80  | 2.5 | 75  |
| 1 | 0 | 0 | 1 | 0 | 0 | 81  | 2.5 | 75  |
| 1 | 0 | 0 | 1 | 0 | 0 | 82  | 2.5 | 75  |
| 1 | 0 | 0 | 1 | 0 | 0 | 83  | 2.5 | 75  |
| 1 | 0 | 0 | 1 | 0 | 0 | 84  | 2.5 | 75  |
| 1 | 0 | 0 | 1 | 0 | 0 | 85  | 2.5 | 75  |
| 1 | 0 | 0 | 1 | 0 | 0 | 86  | 2.5 | 75  |
| 1 | 0 | 0 | 1 | 0 | 0 | 87  | 2.5 | 75  |
| 1 | 0 | 0 | 1 | 0 | 0 | 88  | 2.5 | 75  |
| 1 | 0 | 0 | 1 | 0 | 0 | 89  | 2.5 | 75  |
| 1 | 0 | 0 | 1 | 0 | 0 | 121 | 2.5 | 135 |
| 1 | 0 | 0 | 1 | 0 | 0 | 122 | 2.5 | 135 |
| 1 | 0 | 0 | 1 | 0 | 0 | 123 | 2.5 | 135 |
| 1 | 0 | 0 | 1 | 0 | 0 | 124 | 2.5 | 135 |
| 1 | 0 | 0 | 1 | 0 | 0 | 125 | 2.5 | 135 |
| 1 | 0 | 0 | 1 | 0 | 0 | 126 | 2.5 | 135 |
| 1 | 0 | 0 | 1 | 0 | 0 | 127 | 2.5 | 135 |
| 1 | 0 | 0 | 1 | 0 | 0 | 128 | 2.5 | 135 |
| 1 | 0 | 0 | 1 | 0 | 0 | 129 | 2.5 | 135 |
| 1 | 0 | 0 | 1 | 0 | 0 | 130 | 2.5 | 135 |
| 1 | 0 | 0 | 1 | 0 | 0 | 131 | 2.5 | 135 |
| 1 | 0 | 0 | 1 | 0 | 0 | 132 | 2.5 | 135 |

|   |   |   |   |   |   |     |     |     |
|---|---|---|---|---|---|-----|-----|-----|
| 1 | 0 | 0 | 1 | 0 | 0 | 133 | 2.5 | 135 |
| 1 | 0 | 0 | 1 | 0 | 0 | 134 | 2.5 | 135 |
| 1 | 0 | 0 | 1 | 0 | 0 | 135 | 2.5 | 135 |
| 1 | 0 | 0 | 1 | 0 | 0 | 136 | 2.5 | 135 |
| 1 | 0 | 0 | 1 | 0 | 0 | 137 | 2.5 | 135 |
| 1 | 0 | 0 | 1 | 0 | 0 | 138 | 2.5 | 135 |
| 1 | 0 | 0 | 1 | 0 | 0 | 139 | 2.5 | 135 |
| 1 | 0 | 0 | 1 | 0 | 0 | 140 | 2.5 | 135 |
| 1 | 0 | 0 | 1 | 0 | 0 | 141 | 2.5 | 135 |
| 1 | 0 | 0 | 1 | 0 | 0 | 142 | 2.5 | 135 |
| 1 | 0 | 0 | 1 | 0 | 0 | 143 | 2.5 | 135 |
| 1 | 0 | 0 | 1 | 0 | 0 | 144 | 2.5 | 135 |
| 1 | 0 | 0 | 1 | 0 | 0 | 145 | 2.5 | 135 |
| 1 | 0 | 0 | 1 | 0 | 0 | 146 | 2.5 | 135 |
| 1 | 0 | 0 | 1 | 0 | 0 | 147 | 2.5 | 135 |
| 1 | 0 | 0 | 1 | 0 | 0 | 148 | 2.5 | 135 |
| 1 | 0 | 0 | 1 | 0 | 0 | 149 | 2.5 | 135 |
| 1 | 0 | 0 | 1 | 0 | 0 | 150 | 2.5 | 150 |
| 1 | 0 | 0 | 1 | 0 | 0 | 151 | 2.5 | 165 |
| 1 | 0 | 0 | 1 | 0 | 0 | 152 | 2.5 | 165 |
| 1 | 0 | 0 | 1 | 0 | 0 | 153 | 2.5 | 165 |
| 1 | 0 | 0 | 1 | 0 | 0 | 154 | 2.5 | 165 |
| 1 | 0 | 0 | 1 | 0 | 0 | 155 | 2.5 | 165 |
| 1 | 0 | 0 | 1 | 0 | 0 | 156 | 2.5 | 165 |
| 1 | 0 | 0 | 1 | 0 | 0 | 157 | 2.5 | 165 |
| 1 | 0 | 0 | 1 | 0 | 0 | 158 | 2.5 | 165 |
| 1 | 0 | 0 | 1 | 0 | 0 | 159 | 2.5 | 165 |
| 1 | 0 | 0 | 1 | 0 | 0 | 160 | 2.5 | 165 |
| 1 | 0 | 0 | 1 | 0 | 0 | 161 | 2.5 | 165 |
| 1 | 0 | 0 | 1 | 0 | 0 | 162 | 2.5 | 165 |
| 1 | 0 | 0 | 1 | 0 | 0 | 163 | 2.5 | 165 |
| 1 | 0 | 0 | 1 | 0 | 0 | 164 | 2.5 | 165 |
| 1 | 0 | 0 | 1 | 0 | 0 | 165 | 2.5 | 165 |
| 1 | 0 | 0 | 1 | 0 | 0 | 166 | 2.5 | 165 |
| 1 | 0 | 0 | 1 | 0 | 0 | 167 | 2.5 | 165 |
| 1 | 0 | 0 | 1 | 0 | 0 | 168 | 2.5 | 165 |
| 1 | 0 | 0 | 1 | 0 | 0 | 169 | 2.5 | 165 |
| 1 | 0 | 0 | 1 | 0 | 0 | 170 | 2.5 | 165 |
| 1 | 0 | 0 | 1 | 0 | 0 | 171 | 2.5 | 165 |
| 1 | 0 | 0 | 1 | 0 | 0 | 172 | 2.5 | 165 |
| 1 | 0 | 0 | 1 | 0 | 0 | 173 | 2.5 | 165 |
| 1 | 0 | 0 | 1 | 0 | 0 | 174 | 2.5 | 165 |
| 1 | 0 | 0 | 1 | 0 | 0 | 175 | 2.5 | 165 |
| 1 | 0 | 0 | 1 | 0 | 0 | 176 | 2.5 | 165 |
| 1 | 0 | 0 | 1 | 0 | 0 | 177 | 2.5 | 165 |
| 1 | 0 | 0 | 1 | 0 | 0 | 178 | 2.5 | 165 |

|   |   |   |   |   |   |     |     |     |
|---|---|---|---|---|---|-----|-----|-----|
| 1 | 0 | 0 | 1 | 0 | 0 | 179 | 2.5 | 165 |
| 1 | 0 | 0 | 1 | 0 | 0 | 180 | 2.5 | 180 |
| 1 | 0 | 0 | 0 | 1 | 0 | 31  | 2.5 | 45  |
| 1 | 0 | 0 | 0 | 1 | 0 | 32  | 2.5 | 45  |
| 1 | 0 | 0 | 0 | 1 | 0 | 33  | 2.5 | 45  |
| 1 | 0 | 0 | 0 | 1 | 0 | 34  | 2.5 | 45  |
| 1 | 0 | 0 | 0 | 1 | 0 | 35  | 2.5 | 45  |
| 1 | 0 | 0 | 0 | 1 | 0 | 36  | 2.5 | 45  |
| 1 | 0 | 0 | 0 | 1 | 0 | 37  | 2.5 | 45  |
| 1 | 0 | 0 | 0 | 1 | 0 | 38  | 2.5 | 45  |
| 1 | 0 | 0 | 0 | 1 | 0 | 39  | 2.5 | 45  |
| 1 | 0 | 0 | 0 | 1 | 0 | 40  | 2.5 | 45  |
| 1 | 0 | 0 | 0 | 1 | 0 | 41  | 2.5 | 45  |
| 1 | 0 | 0 | 0 | 1 | 0 | 42  | 2.5 | 45  |
| 1 | 0 | 0 | 0 | 1 | 0 | 43  | 2.5 | 45  |
| 1 | 0 | 0 | 0 | 1 | 0 | 44  | 2.5 | 45  |
| 1 | 0 | 0 | 0 | 1 | 0 | 45  | 2.5 | 45  |
| 1 | 0 | 0 | 0 | 1 | 0 | 46  | 2.5 | 45  |
| 1 | 0 | 0 | 0 | 1 | 0 | 47  | 2.5 | 45  |
| 1 | 0 | 0 | 0 | 1 | 0 | 48  | 2.5 | 45  |
| 1 | 0 | 0 | 0 | 1 | 0 | 49  | 2.5 | 45  |
| 1 | 0 | 0 | 0 | 1 | 0 | 50  | 2.5 | 45  |
| 1 | 0 | 0 | 0 | 1 | 0 | 51  | 2.5 | 45  |
| 1 | 0 | 0 | 0 | 1 | 0 | 52  | 2.5 | 45  |
| 1 | 0 | 0 | 0 | 1 | 0 | 53  | 2.5 | 45  |
| 1 | 0 | 0 | 0 | 1 | 0 | 54  | 2.5 | 45  |
| 1 | 0 | 0 | 0 | 1 | 0 | 55  | 2.5 | 45  |
| 1 | 0 | 0 | 0 | 1 | 0 | 56  | 2.5 | 45  |
| 1 | 0 | 0 | 0 | 1 | 0 | 57  | 2.5 | 45  |
| 1 | 0 | 0 | 0 | 1 | 0 | 58  | 2.5 | 45  |
| 1 | 0 | 0 | 0 | 1 | 0 | 59  | 2.5 | 45  |
| 1 | 0 | 0 | 0 | 1 | 0 | 60  | 2.5 | 60  |
| 1 | 0 | 0 | 0 | 1 | 0 | 61  | 2.5 | 75  |
| 1 | 0 | 0 | 0 | 1 | 0 | 62  | 2.5 | 75  |
| 1 | 0 | 0 | 0 | 1 | 0 | 63  | 2.5 | 75  |
| 1 | 0 | 0 | 0 | 1 | 0 | 64  | 2.5 | 75  |
| 1 | 0 | 0 | 0 | 1 | 0 | 65  | 2.5 | 75  |
| 1 | 0 | 0 | 0 | 1 | 0 | 66  | 2.5 | 75  |
| 1 | 0 | 0 | 0 | 1 | 0 | 67  | 2.5 | 75  |
| 1 | 0 | 0 | 0 | 1 | 0 | 68  | 2.5 | 75  |
| 1 | 0 | 0 | 0 | 1 | 0 | 69  | 2.5 | 75  |
| 1 | 0 | 0 | 0 | 1 | 0 | 70  | 2.5 | 75  |
| 1 | 0 | 0 | 0 | 1 | 0 | 71  | 2.5 | 75  |
| 1 | 0 | 0 | 0 | 1 | 0 | 72  | 2.5 | 75  |
| 1 | 0 | 0 | 0 | 1 | 0 | 73  | 2.5 | 75  |
| 1 | 0 | 0 | 0 | 1 | 0 | 74  | 2.5 | 75  |

|   |   |   |   |   |   |     |     |     |
|---|---|---|---|---|---|-----|-----|-----|
| 1 | 0 | 0 | 0 | 1 | 0 | 75  | 2.5 | 75  |
| 1 | 0 | 0 | 0 | 1 | 0 | 76  | 2.5 | 75  |
| 1 | 0 | 0 | 0 | 1 | 0 | 77  | 2.5 | 75  |
| 1 | 0 | 0 | 0 | 1 | 0 | 78  | 2.5 | 75  |
| 1 | 0 | 0 | 0 | 1 | 0 | 79  | 2.5 | 75  |
| 1 | 0 | 0 | 0 | 1 | 0 | 80  | 2.5 | 75  |
| 1 | 0 | 0 | 0 | 1 | 0 | 81  | 2.5 | 75  |
| 1 | 0 | 0 | 0 | 1 | 0 | 82  | 2.5 | 75  |
| 1 | 0 | 0 | 0 | 1 | 0 | 83  | 2.5 | 75  |
| 1 | 0 | 0 | 0 | 1 | 0 | 84  | 2.5 | 75  |
| 1 | 0 | 0 | 0 | 1 | 0 | 85  | 2.5 | 75  |
| 1 | 0 | 0 | 0 | 1 | 0 | 86  | 2.5 | 75  |
| 1 | 0 | 0 | 0 | 1 | 0 | 87  | 2.5 | 75  |
| 1 | 0 | 0 | 0 | 1 | 0 | 88  | 2.5 | 75  |
| 1 | 0 | 0 | 0 | 1 | 0 | 89  | 2.5 | 75  |
| 1 | 0 | 0 | 0 | 1 | 0 | 90  | 2.5 | 90  |
| 1 | 0 | 0 | 0 | 1 | 0 | 91  | 2.5 | 105 |
| 1 | 0 | 0 | 0 | 1 | 0 | 92  | 2.5 | 105 |
| 1 | 0 | 0 | 0 | 1 | 0 | 93  | 2.5 | 105 |
| 1 | 0 | 0 | 0 | 1 | 0 | 94  | 2.5 | 105 |
| 1 | 0 | 0 | 0 | 1 | 0 | 95  | 2.5 | 105 |
| 1 | 0 | 0 | 0 | 1 | 0 | 96  | 2.5 | 105 |
| 1 | 0 | 0 | 0 | 1 | 0 | 97  | 2.5 | 105 |
| 1 | 0 | 0 | 0 | 1 | 0 | 98  | 2.5 | 105 |
| 1 | 0 | 0 | 0 | 1 | 0 | 99  | 2.5 | 105 |
| 1 | 0 | 0 | 0 | 1 | 0 | 100 | 2.5 | 105 |
| 1 | 0 | 0 | 0 | 1 | 0 | 101 | 2.5 | 105 |
| 1 | 0 | 0 | 0 | 1 | 0 | 102 | 2.5 | 105 |
| 1 | 0 | 0 | 0 | 1 | 0 | 103 | 2.5 | 105 |
| 1 | 0 | 0 | 0 | 1 | 0 | 104 | 2.5 | 105 |
| 1 | 0 | 0 | 0 | 1 | 0 | 105 | 2.5 | 105 |
| 1 | 0 | 0 | 0 | 1 | 0 | 106 | 2.5 | 105 |
| 1 | 0 | 0 | 0 | 1 | 0 | 107 | 2.5 | 105 |
| 1 | 0 | 0 | 0 | 1 | 0 | 108 | 2.5 | 105 |
| 1 | 0 | 0 | 0 | 1 | 0 | 109 | 2.5 | 105 |
| 1 | 0 | 0 | 0 | 1 | 0 | 110 | 2.5 | 105 |
| 1 | 0 | 0 | 0 | 1 | 0 | 111 | 2.5 | 105 |
| 1 | 0 | 0 | 0 | 1 | 0 | 112 | 2.5 | 105 |
| 1 | 0 | 0 | 0 | 1 | 0 | 113 | 2.5 | 105 |
| 1 | 0 | 0 | 0 | 1 | 0 | 114 | 2.5 | 105 |
| 1 | 0 | 0 | 0 | 1 | 0 | 115 | 2.5 | 105 |
| 1 | 0 | 0 | 0 | 1 | 0 | 116 | 2.5 | 105 |
| 1 | 0 | 0 | 0 | 1 | 0 | 117 | 2.5 | 105 |
| 1 | 0 | 0 | 0 | 1 | 0 | 118 | 2.5 | 105 |
| 1 | 0 | 0 | 0 | 1 | 0 | 119 | 2.5 | 105 |
| 1 | 0 | 0 | 0 | 1 | 0 | 151 | 2.5 | 165 |

|   |   |   |   |   |   |     |     |     |
|---|---|---|---|---|---|-----|-----|-----|
| 1 | 0 | 0 | 0 | 1 | 0 | 152 | 2.5 | 165 |
| 1 | 0 | 0 | 0 | 1 | 0 | 153 | 2.5 | 165 |
| 1 | 0 | 0 | 0 | 1 | 0 | 154 | 2.5 | 165 |
| 1 | 0 | 0 | 0 | 1 | 0 | 155 | 2.5 | 165 |
| 1 | 0 | 0 | 0 | 1 | 0 | 156 | 2.5 | 165 |
| 1 | 0 | 0 | 0 | 1 | 0 | 157 | 2.5 | 165 |
| 1 | 0 | 0 | 0 | 1 | 0 | 158 | 2.5 | 165 |
| 1 | 0 | 0 | 0 | 1 | 0 | 159 | 2.5 | 165 |
| 1 | 0 | 0 | 0 | 1 | 0 | 160 | 2.5 | 165 |
| 1 | 0 | 0 | 0 | 1 | 0 | 161 | 2.5 | 165 |
| 1 | 0 | 0 | 0 | 1 | 0 | 162 | 2.5 | 165 |
| 1 | 0 | 0 | 0 | 1 | 0 | 163 | 2.5 | 165 |
| 1 | 0 | 0 | 0 | 1 | 0 | 164 | 2.5 | 165 |
| 1 | 0 | 0 | 0 | 1 | 0 | 165 | 2.5 | 165 |
| 1 | 0 | 0 | 0 | 1 | 0 | 166 | 2.5 | 165 |
| 1 | 0 | 0 | 0 | 1 | 0 | 167 | 2.5 | 165 |
| 1 | 0 | 0 | 0 | 1 | 0 | 168 | 2.5 | 165 |
| 1 | 0 | 0 | 0 | 1 | 0 | 169 | 2.5 | 165 |
| 1 | 0 | 0 | 0 | 1 | 0 | 170 | 2.5 | 165 |
| 1 | 0 | 0 | 0 | 1 | 0 | 171 | 2.5 | 165 |
| 1 | 0 | 0 | 0 | 1 | 0 | 172 | 2.5 | 165 |
| 1 | 0 | 0 | 0 | 1 | 0 | 173 | 2.5 | 165 |
| 1 | 0 | 0 | 0 | 1 | 0 | 174 | 2.5 | 165 |
| 1 | 0 | 0 | 0 | 1 | 0 | 175 | 2.5 | 165 |
| 1 | 0 | 0 | 0 | 1 | 0 | 176 | 2.5 | 165 |
| 1 | 0 | 0 | 0 | 1 | 0 | 177 | 2.5 | 165 |
| 1 | 0 | 0 | 0 | 1 | 0 | 178 | 2.5 | 165 |
| 1 | 0 | 0 | 0 | 1 | 0 | 179 | 2.5 | 165 |
| 1 | 0 | 0 | 0 | 1 | 0 | 180 | 2.5 | 180 |
| 1 | 0 | 0 | 0 | 0 | 1 | 31  | 2.5 | 45  |
| 1 | 0 | 0 | 0 | 0 | 1 | 32  | 2.5 | 45  |
| 1 | 0 | 0 | 0 | 0 | 1 | 33  | 2.5 | 45  |
| 1 | 0 | 0 | 0 | 0 | 1 | 34  | 2.5 | 45  |
| 1 | 0 | 0 | 0 | 0 | 1 | 35  | 2.5 | 45  |
| 1 | 0 | 0 | 0 | 0 | 1 | 36  | 2.5 | 45  |
| 1 | 0 | 0 | 0 | 0 | 1 | 37  | 2.5 | 45  |
| 1 | 0 | 0 | 0 | 0 | 1 | 38  | 2.5 | 45  |
| 1 | 0 | 0 | 0 | 0 | 1 | 39  | 2.5 | 45  |
| 1 | 0 | 0 | 0 | 0 | 1 | 40  | 2.5 | 45  |
| 1 | 0 | 0 | 0 | 0 | 1 | 41  | 2.5 | 45  |
| 1 | 0 | 0 | 0 | 0 | 1 | 42  | 2.5 | 45  |
| 1 | 0 | 0 | 0 | 0 | 1 | 43  | 2.5 | 45  |
| 1 | 0 | 0 | 0 | 0 | 1 | 44  | 2.5 | 45  |
| 1 | 0 | 0 | 0 | 0 | 1 | 45  | 2.5 | 45  |
| 1 | 0 | 0 | 0 | 0 | 1 | 46  | 2.5 | 45  |
| 1 | 0 | 0 | 0 | 0 | 1 | 47  | 2.5 | 45  |

|   |   |   |   |   |   |    |     |     |
|---|---|---|---|---|---|----|-----|-----|
| 1 | 0 | 0 | 0 | 0 | 1 | 48 | 2.5 | 45  |
| 1 | 0 | 0 | 0 | 0 | 1 | 49 | 2.5 | 45  |
| 1 | 0 | 0 | 0 | 0 | 1 | 50 | 2.5 | 45  |
| 1 | 0 | 0 | 0 | 0 | 1 | 51 | 2.5 | 45  |
| 1 | 0 | 0 | 0 | 0 | 1 | 52 | 2.5 | 45  |
| 1 | 0 | 0 | 0 | 0 | 1 | 53 | 2.5 | 45  |
| 1 | 0 | 0 | 0 | 0 | 1 | 54 | 2.5 | 45  |
| 1 | 0 | 0 | 0 | 0 | 1 | 55 | 2.5 | 45  |
| 1 | 0 | 0 | 0 | 0 | 1 | 56 | 2.5 | 45  |
| 1 | 0 | 0 | 0 | 0 | 1 | 57 | 2.5 | 45  |
| 1 | 0 | 0 | 0 | 0 | 1 | 58 | 2.5 | 45  |
| 1 | 0 | 0 | 0 | 0 | 1 | 59 | 2.5 | 45  |
| 1 | 0 | 0 | 0 | 0 | 1 | 60 | 2.5 | 60  |
| 1 | 0 | 0 | 0 | 0 | 1 | 61 | 2.5 | 75  |
| 1 | 0 | 0 | 0 | 0 | 1 | 62 | 2.5 | 75  |
| 1 | 0 | 0 | 0 | 0 | 1 | 63 | 2.5 | 75  |
| 1 | 0 | 0 | 0 | 0 | 1 | 64 | 2.5 | 75  |
| 1 | 0 | 0 | 0 | 0 | 1 | 65 | 2.5 | 75  |
| 1 | 0 | 0 | 0 | 0 | 1 | 66 | 2.5 | 75  |
| 1 | 0 | 0 | 0 | 0 | 1 | 67 | 2.5 | 75  |
| 1 | 0 | 0 | 0 | 0 | 1 | 68 | 2.5 | 75  |
| 1 | 0 | 0 | 0 | 0 | 1 | 69 | 2.5 | 75  |
| 1 | 0 | 0 | 0 | 0 | 1 | 70 | 2.5 | 75  |
| 1 | 0 | 0 | 0 | 0 | 1 | 71 | 2.5 | 75  |
| 1 | 0 | 0 | 0 | 0 | 1 | 72 | 2.5 | 75  |
| 1 | 0 | 0 | 0 | 0 | 1 | 73 | 2.5 | 75  |
| 1 | 0 | 0 | 0 | 0 | 1 | 74 | 2.5 | 75  |
| 1 | 0 | 0 | 0 | 0 | 1 | 75 | 2.5 | 75  |
| 1 | 0 | 0 | 0 | 0 | 1 | 76 | 2.5 | 75  |
| 1 | 0 | 0 | 0 | 0 | 1 | 77 | 2.5 | 75  |
| 1 | 0 | 0 | 0 | 0 | 1 | 78 | 2.5 | 75  |
| 1 | 0 | 0 | 0 | 0 | 1 | 79 | 2.5 | 75  |
| 1 | 0 | 0 | 0 | 0 | 1 | 80 | 2.5 | 75  |
| 1 | 0 | 0 | 0 | 0 | 1 | 81 | 2.5 | 75  |
| 1 | 0 | 0 | 0 | 0 | 1 | 82 | 2.5 | 75  |
| 1 | 0 | 0 | 0 | 0 | 1 | 83 | 2.5 | 75  |
| 1 | 0 | 0 | 0 | 0 | 1 | 84 | 2.5 | 75  |
| 1 | 0 | 0 | 0 | 0 | 1 | 85 | 2.5 | 75  |
| 1 | 0 | 0 | 0 | 0 | 1 | 86 | 2.5 | 75  |
| 1 | 0 | 0 | 0 | 0 | 1 | 87 | 2.5 | 75  |
| 1 | 0 | 0 | 0 | 0 | 1 | 88 | 2.5 | 75  |
| 1 | 0 | 0 | 0 | 0 | 1 | 89 | 2.5 | 75  |
| 1 | 0 | 0 | 0 | 0 | 1 | 90 | 2.5 | 90  |
| 1 | 0 | 0 | 0 | 0 | 1 | 91 | 2.5 | 105 |
| 1 | 0 | 0 | 0 | 0 | 1 | 92 | 2.5 | 105 |
| 1 | 0 | 0 | 0 | 0 | 1 | 93 | 2.5 | 105 |

|   |   |   |   |   |   |     |     |     |
|---|---|---|---|---|---|-----|-----|-----|
| 1 | 0 | 0 | 0 | 0 | 1 | 94  | 2.5 | 105 |
| 1 | 0 | 0 | 0 | 0 | 1 | 95  | 2.5 | 105 |
| 1 | 0 | 0 | 0 | 0 | 1 | 96  | 2.5 | 105 |
| 1 | 0 | 0 | 0 | 0 | 1 | 97  | 2.5 | 105 |
| 1 | 0 | 0 | 0 | 0 | 1 | 98  | 2.5 | 105 |
| 1 | 0 | 0 | 0 | 0 | 1 | 99  | 2.5 | 105 |
| 1 | 0 | 0 | 0 | 0 | 1 | 100 | 2.5 | 105 |
| 1 | 0 | 0 | 0 | 0 | 1 | 101 | 2.5 | 105 |
| 1 | 0 | 0 | 0 | 0 | 1 | 102 | 2.5 | 105 |
| 1 | 0 | 0 | 0 | 0 | 1 | 103 | 2.5 | 105 |
| 1 | 0 | 0 | 0 | 0 | 1 | 104 | 2.5 | 105 |
| 1 | 0 | 0 | 0 | 0 | 1 | 105 | 2.5 | 105 |
| 1 | 0 | 0 | 0 | 0 | 1 | 106 | 2.5 | 105 |
| 1 | 0 | 0 | 0 | 0 | 1 | 107 | 2.5 | 105 |
| 1 | 0 | 0 | 0 | 0 | 1 | 108 | 2.5 | 105 |
| 1 | 0 | 0 | 0 | 0 | 1 | 109 | 2.5 | 105 |
| 1 | 0 | 0 | 0 | 0 | 1 | 110 | 2.5 | 105 |
| 1 | 0 | 0 | 0 | 0 | 1 | 111 | 2.5 | 105 |
| 1 | 0 | 0 | 0 | 0 | 1 | 112 | 2.5 | 105 |
| 1 | 0 | 0 | 0 | 0 | 1 | 113 | 2.5 | 105 |
| 1 | 0 | 0 | 0 | 0 | 1 | 114 | 2.5 | 105 |
| 1 | 0 | 0 | 0 | 0 | 1 | 115 | 2.5 | 105 |
| 1 | 0 | 0 | 0 | 0 | 1 | 116 | 2.5 | 105 |
| 1 | 0 | 0 | 0 | 0 | 1 | 117 | 2.5 | 105 |
| 1 | 0 | 0 | 0 | 0 | 1 | 118 | 2.5 | 105 |
| 1 | 0 | 0 | 0 | 0 | 1 | 119 | 2.5 | 105 |
| 1 | 0 | 0 | 0 | 0 | 1 | 120 | 2.5 | 120 |
| 1 | 0 | 0 | 0 | 0 | 1 | 121 | 2.5 | 135 |
| 1 | 0 | 0 | 0 | 0 | 1 | 122 | 2.5 | 135 |
| 1 | 0 | 0 | 0 | 0 | 1 | 123 | 2.5 | 135 |
| 1 | 0 | 0 | 0 | 0 | 1 | 124 | 2.5 | 135 |
| 1 | 0 | 0 | 0 | 0 | 1 | 125 | 2.5 | 135 |
| 1 | 0 | 0 | 0 | 0 | 1 | 126 | 2.5 | 135 |
| 1 | 0 | 0 | 0 | 0 | 1 | 127 | 2.5 | 135 |
| 1 | 0 | 0 | 0 | 0 | 1 | 128 | 2.5 | 135 |
| 1 | 0 | 0 | 0 | 0 | 1 | 129 | 2.5 | 135 |
| 1 | 0 | 0 | 0 | 0 | 1 | 130 | 2.5 | 135 |
| 1 | 0 | 0 | 0 | 0 | 1 | 131 | 2.5 | 135 |
| 1 | 0 | 0 | 0 | 0 | 1 | 132 | 2.5 | 135 |
| 1 | 0 | 0 | 0 | 0 | 1 | 133 | 2.5 | 135 |
| 1 | 0 | 0 | 0 | 0 | 1 | 134 | 2.5 | 135 |
| 1 | 0 | 0 | 0 | 0 | 1 | 135 | 2.5 | 135 |
| 1 | 0 | 0 | 0 | 0 | 1 | 136 | 2.5 | 135 |
| 1 | 0 | 0 | 0 | 0 | 1 | 137 | 2.5 | 135 |
| 1 | 0 | 0 | 0 | 0 | 1 | 138 | 2.5 | 135 |
| 1 | 0 | 0 | 0 | 0 | 1 | 139 | 2.5 | 135 |

|   |   |   |   |   |   |     |     |     |
|---|---|---|---|---|---|-----|-----|-----|
| 1 | 0 | 0 | 0 | 0 | 1 | 140 | 2.5 | 135 |
| 1 | 0 | 0 | 0 | 0 | 1 | 141 | 2.5 | 135 |
| 1 | 0 | 0 | 0 | 0 | 1 | 142 | 2.5 | 135 |
| 1 | 0 | 0 | 0 | 0 | 1 | 143 | 2.5 | 135 |
| 1 | 0 | 0 | 0 | 0 | 1 | 144 | 2.5 | 135 |
| 1 | 0 | 0 | 0 | 0 | 1 | 145 | 2.5 | 135 |
| 1 | 0 | 0 | 0 | 0 | 1 | 146 | 2.5 | 135 |
| 1 | 0 | 0 | 0 | 0 | 1 | 147 | 2.5 | 135 |
| 1 | 0 | 0 | 0 | 0 | 1 | 148 | 2.5 | 135 |
| 1 | 0 | 0 | 0 | 0 | 1 | 149 | 2.5 | 135 |
| 1 | 1 | 1 | 0 | 0 | 0 | 91  | 2.5 | 105 |
| 1 | 1 | 1 | 0 | 0 | 0 | 92  | 2.5 | 105 |
| 1 | 1 | 1 | 0 | 0 | 0 | 93  | 2.5 | 105 |
| 1 | 1 | 1 | 0 | 0 | 0 | 94  | 2.5 | 105 |
| 1 | 1 | 1 | 0 | 0 | 0 | 95  | 2.5 | 105 |
| 1 | 1 | 1 | 0 | 0 | 0 | 96  | 2.5 | 105 |
| 1 | 1 | 1 | 0 | 0 | 0 | 97  | 2.5 | 105 |
| 1 | 1 | 1 | 0 | 0 | 0 | 98  | 2.5 | 105 |
| 1 | 1 | 1 | 0 | 0 | 0 | 99  | 2.5 | 105 |
| 1 | 1 | 1 | 0 | 0 | 0 | 100 | 2.5 | 105 |
| 1 | 1 | 1 | 0 | 0 | 0 | 101 | 2.5 | 105 |
| 1 | 1 | 1 | 0 | 0 | 0 | 102 | 2.5 | 105 |
| 1 | 1 | 1 | 0 | 0 | 0 | 103 | 2.5 | 105 |
| 1 | 1 | 1 | 0 | 0 | 0 | 104 | 2.5 | 105 |
| 1 | 1 | 1 | 0 | 0 | 0 | 105 | 2.5 | 105 |
| 1 | 1 | 1 | 0 | 0 | 0 | 106 | 2.5 | 105 |
| 1 | 1 | 1 | 0 | 0 | 0 | 107 | 2.5 | 105 |
| 1 | 1 | 1 | 0 | 0 | 0 | 108 | 2.5 | 105 |
| 1 | 1 | 1 | 0 | 0 | 0 | 109 | 2.5 | 105 |
| 1 | 1 | 1 | 0 | 0 | 0 | 110 | 2.5 | 105 |
| 1 | 1 | 1 | 0 | 0 | 0 | 111 | 2.5 | 105 |
| 1 | 1 | 1 | 0 | 0 | 0 | 112 | 2.5 | 105 |
| 1 | 1 | 1 | 0 | 0 | 0 | 113 | 2.5 | 105 |
| 1 | 1 | 1 | 0 | 0 | 0 | 114 | 2.5 | 105 |
| 1 | 1 | 1 | 0 | 0 | 0 | 115 | 2.5 | 105 |
| 1 | 1 | 1 | 0 | 0 | 0 | 116 | 2.5 | 105 |
| 1 | 1 | 1 | 0 | 0 | 0 | 117 | 2.5 | 105 |
| 1 | 1 | 1 | 0 | 0 | 0 | 118 | 2.5 | 105 |
| 1 | 1 | 1 | 0 | 0 | 0 | 119 | 2.5 | 105 |
| 1 | 1 | 1 | 0 | 0 | 0 | 120 | 2.5 | 120 |
| 1 | 1 | 1 | 0 | 0 | 0 | 121 | 2.5 | 135 |
| 1 | 1 | 1 | 0 | 0 | 0 | 122 | 2.5 | 135 |
| 1 | 1 | 1 | 0 | 0 | 0 | 123 | 2.5 | 135 |
| 1 | 1 | 1 | 0 | 0 | 0 | 124 | 2.5 | 135 |
| 1 | 1 | 1 | 0 | 0 | 0 | 125 | 2.5 | 135 |
| 1 | 1 | 1 | 0 | 0 | 0 | 126 | 2.5 | 135 |

|   |   |   |   |   |   |     |     |     |
|---|---|---|---|---|---|-----|-----|-----|
| 1 | 1 | 1 | 0 | 0 | 0 | 127 | 2.5 | 135 |
| 1 | 1 | 1 | 0 | 0 | 0 | 128 | 2.5 | 135 |
| 1 | 1 | 1 | 0 | 0 | 0 | 129 | 2.5 | 135 |
| 1 | 1 | 1 | 0 | 0 | 0 | 130 | 2.5 | 135 |
| 1 | 1 | 1 | 0 | 0 | 0 | 131 | 2.5 | 135 |
| 1 | 1 | 1 | 0 | 0 | 0 | 132 | 2.5 | 135 |
| 1 | 1 | 1 | 0 | 0 | 0 | 133 | 2.5 | 135 |
| 1 | 1 | 1 | 0 | 0 | 0 | 134 | 2.5 | 135 |
| 1 | 1 | 1 | 0 | 0 | 0 | 135 | 2.5 | 135 |
| 1 | 1 | 1 | 0 | 0 | 0 | 136 | 2.5 | 135 |
| 1 | 1 | 1 | 0 | 0 | 0 | 137 | 2.5 | 135 |
| 1 | 1 | 1 | 0 | 0 | 0 | 138 | 2.5 | 135 |
| 1 | 1 | 1 | 0 | 0 | 0 | 139 | 2.5 | 135 |
| 1 | 1 | 1 | 0 | 0 | 0 | 140 | 2.5 | 135 |
| 1 | 1 | 1 | 0 | 0 | 0 | 141 | 2.5 | 135 |
| 1 | 1 | 1 | 0 | 0 | 0 | 142 | 2.5 | 135 |
| 1 | 1 | 1 | 0 | 0 | 0 | 143 | 2.5 | 135 |
| 1 | 1 | 1 | 0 | 0 | 0 | 144 | 2.5 | 135 |
| 1 | 1 | 1 | 0 | 0 | 0 | 145 | 2.5 | 135 |
| 1 | 1 | 1 | 0 | 0 | 0 | 146 | 2.5 | 135 |
| 1 | 1 | 1 | 0 | 0 | 0 | 147 | 2.5 | 135 |
| 1 | 1 | 1 | 0 | 0 | 0 | 148 | 2.5 | 135 |
| 1 | 1 | 1 | 0 | 0 | 0 | 149 | 2.5 | 135 |
| 1 | 1 | 1 | 0 | 0 | 0 | 150 | 2.5 | 150 |
| 1 | 1 | 1 | 0 | 0 | 0 | 151 | 2.5 | 165 |
| 1 | 1 | 1 | 0 | 0 | 0 | 152 | 2.5 | 165 |
| 1 | 1 | 1 | 0 | 0 | 0 | 153 | 2.5 | 165 |
| 1 | 1 | 1 | 0 | 0 | 0 | 154 | 2.5 | 165 |
| 1 | 1 | 1 | 0 | 0 | 0 | 155 | 2.5 | 165 |
| 1 | 1 | 1 | 0 | 0 | 0 | 156 | 2.5 | 165 |
| 1 | 1 | 1 | 0 | 0 | 0 | 157 | 2.5 | 165 |
| 1 | 1 | 1 | 0 | 0 | 0 | 158 | 2.5 | 165 |
| 1 | 1 | 1 | 0 | 0 | 0 | 159 | 2.5 | 165 |
| 1 | 1 | 1 | 0 | 0 | 0 | 160 | 2.5 | 165 |
| 1 | 1 | 1 | 0 | 0 | 0 | 161 | 2.5 | 165 |
| 1 | 1 | 1 | 0 | 0 | 0 | 162 | 2.5 | 165 |
| 1 | 1 | 1 | 0 | 0 | 0 | 163 | 2.5 | 165 |
| 1 | 1 | 1 | 0 | 0 | 0 | 164 | 2.5 | 165 |
| 1 | 1 | 1 | 0 | 0 | 0 | 165 | 2.5 | 165 |
| 1 | 1 | 1 | 0 | 0 | 0 | 166 | 2.5 | 165 |
| 1 | 1 | 1 | 0 | 0 | 0 | 167 | 2.5 | 165 |
| 1 | 1 | 1 | 0 | 0 | 0 | 168 | 2.5 | 165 |
| 1 | 1 | 1 | 0 | 0 | 0 | 169 | 2.5 | 165 |
| 1 | 1 | 1 | 0 | 0 | 0 | 170 | 2.5 | 165 |
| 1 | 1 | 1 | 0 | 0 | 0 | 171 | 2.5 | 165 |
| 1 | 1 | 1 | 0 | 0 | 0 | 172 | 2.5 | 165 |

|   |   |   |   |   |   |     |     |     |
|---|---|---|---|---|---|-----|-----|-----|
| 1 | 1 | 1 | 0 | 0 | 0 | 173 | 2.5 | 165 |
| 1 | 1 | 1 | 0 | 0 | 0 | 174 | 2.5 | 165 |
| 1 | 1 | 1 | 0 | 0 | 0 | 175 | 2.5 | 165 |
| 1 | 1 | 1 | 0 | 0 | 0 | 176 | 2.5 | 165 |
| 1 | 1 | 1 | 0 | 0 | 0 | 177 | 2.5 | 165 |
| 1 | 1 | 1 | 0 | 0 | 0 | 178 | 2.5 | 165 |
| 1 | 1 | 1 | 0 | 0 | 0 | 179 | 2.5 | 165 |
| 1 | 1 | 1 | 0 | 0 | 0 | 180 | 2.5 | 180 |
| 1 | 1 | 0 | 1 | 0 | 0 | 61  | 2.5 | 75  |
| 1 | 1 | 0 | 1 | 0 | 0 | 62  | 2.5 | 75  |
| 1 | 1 | 0 | 1 | 0 | 0 | 63  | 2.5 | 75  |
| 1 | 1 | 0 | 1 | 0 | 0 | 64  | 2.5 | 75  |
| 1 | 1 | 0 | 1 | 0 | 0 | 65  | 2.5 | 75  |
| 1 | 1 | 0 | 1 | 0 | 0 | 66  | 2.5 | 75  |
| 1 | 1 | 0 | 1 | 0 | 0 | 67  | 2.5 | 75  |
| 1 | 1 | 0 | 1 | 0 | 0 | 68  | 2.5 | 75  |
| 1 | 1 | 0 | 1 | 0 | 0 | 69  | 2.5 | 75  |
| 1 | 1 | 0 | 1 | 0 | 0 | 70  | 2.5 | 75  |
| 1 | 1 | 0 | 1 | 0 | 0 | 71  | 2.5 | 75  |
| 1 | 1 | 0 | 1 | 0 | 0 | 72  | 2.5 | 75  |
| 1 | 1 | 0 | 1 | 0 | 0 | 73  | 2.5 | 75  |
| 1 | 1 | 0 | 1 | 0 | 0 | 74  | 2.5 | 75  |
| 1 | 1 | 0 | 1 | 0 | 0 | 75  | 2.5 | 75  |
| 1 | 1 | 0 | 1 | 0 | 0 | 76  | 2.5 | 75  |
| 1 | 1 | 0 | 1 | 0 | 0 | 77  | 2.5 | 75  |
| 1 | 1 | 0 | 1 | 0 | 0 | 78  | 2.5 | 75  |
| 1 | 1 | 0 | 1 | 0 | 0 | 79  | 2.5 | 75  |
| 1 | 1 | 0 | 1 | 0 | 0 | 80  | 2.5 | 75  |
| 1 | 1 | 0 | 1 | 0 | 0 | 81  | 2.5 | 75  |
| 1 | 1 | 0 | 1 | 0 | 0 | 82  | 2.5 | 75  |
| 1 | 1 | 0 | 1 | 0 | 0 | 83  | 2.5 | 75  |
| 1 | 1 | 0 | 1 | 0 | 0 | 84  | 2.5 | 75  |
| 1 | 1 | 0 | 1 | 0 | 0 | 85  | 2.5 | 75  |
| 1 | 1 | 0 | 1 | 0 | 0 | 86  | 2.5 | 75  |
| 1 | 1 | 0 | 1 | 0 | 0 | 87  | 2.5 | 75  |
| 1 | 1 | 0 | 1 | 0 | 0 | 88  | 2.5 | 75  |
| 1 | 1 | 0 | 1 | 0 | 0 | 89  | 2.5 | 75  |
| 1 | 1 | 0 | 1 | 0 | 0 | 121 | 2.5 | 135 |
| 1 | 1 | 0 | 1 | 0 | 0 | 122 | 2.5 | 135 |
| 1 | 1 | 0 | 1 | 0 | 0 | 123 | 2.5 | 135 |
| 1 | 1 | 0 | 1 | 0 | 0 | 124 | 2.5 | 135 |
| 1 | 1 | 0 | 1 | 0 | 0 | 125 | 2.5 | 135 |
| 1 | 1 | 0 | 1 | 0 | 0 | 126 | 2.5 | 135 |
| 1 | 1 | 0 | 1 | 0 | 0 | 127 | 2.5 | 135 |
| 1 | 1 | 0 | 1 | 0 | 0 | 128 | 2.5 | 135 |
| 1 | 1 | 0 | 1 | 0 | 0 | 129 | 2.5 | 135 |

|   |   |   |   |   |   |     |     |     |
|---|---|---|---|---|---|-----|-----|-----|
| 1 | 1 | 0 | 1 | 0 | 0 | 130 | 2.5 | 135 |
| 1 | 1 | 0 | 1 | 0 | 0 | 131 | 2.5 | 135 |
| 1 | 1 | 0 | 1 | 0 | 0 | 132 | 2.5 | 135 |
| 1 | 1 | 0 | 1 | 0 | 0 | 133 | 2.5 | 135 |
| 1 | 1 | 0 | 1 | 0 | 0 | 134 | 2.5 | 135 |
| 1 | 1 | 0 | 1 | 0 | 0 | 135 | 2.5 | 135 |
| 1 | 1 | 0 | 1 | 0 | 0 | 136 | 2.5 | 135 |
| 1 | 1 | 0 | 1 | 0 | 0 | 137 | 2.5 | 135 |
| 1 | 1 | 0 | 1 | 0 | 0 | 138 | 2.5 | 135 |
| 1 | 1 | 0 | 1 | 0 | 0 | 139 | 2.5 | 135 |
| 1 | 1 | 0 | 1 | 0 | 0 | 140 | 2.5 | 135 |
| 1 | 1 | 0 | 1 | 0 | 0 | 141 | 2.5 | 135 |
| 1 | 1 | 0 | 1 | 0 | 0 | 142 | 2.5 | 135 |
| 1 | 1 | 0 | 1 | 0 | 0 | 143 | 2.5 | 135 |
| 1 | 1 | 0 | 1 | 0 | 0 | 144 | 2.5 | 135 |
| 1 | 1 | 0 | 1 | 0 | 0 | 145 | 2.5 | 135 |
| 1 | 1 | 0 | 1 | 0 | 0 | 146 | 2.5 | 135 |
| 1 | 1 | 0 | 1 | 0 | 0 | 147 | 2.5 | 135 |
| 1 | 1 | 0 | 1 | 0 | 0 | 148 | 2.5 | 135 |
| 1 | 1 | 0 | 1 | 0 | 0 | 149 | 2.5 | 135 |
| 1 | 1 | 0 | 1 | 0 | 0 | 150 | 2.5 | 150 |
| 1 | 1 | 0 | 1 | 0 | 0 | 151 | 2.5 | 165 |
| 1 | 1 | 0 | 1 | 0 | 0 | 152 | 2.5 | 165 |
| 1 | 1 | 0 | 1 | 0 | 0 | 153 | 2.5 | 165 |
| 1 | 1 | 0 | 1 | 0 | 0 | 154 | 2.5 | 165 |
| 1 | 1 | 0 | 1 | 0 | 0 | 155 | 2.5 | 165 |
| 1 | 1 | 0 | 1 | 0 | 0 | 156 | 2.5 | 165 |
| 1 | 1 | 0 | 1 | 0 | 0 | 157 | 2.5 | 165 |
| 1 | 1 | 0 | 1 | 0 | 0 | 158 | 2.5 | 165 |
| 1 | 1 | 0 | 1 | 0 | 0 | 159 | 2.5 | 165 |
| 1 | 1 | 0 | 1 | 0 | 0 | 160 | 2.5 | 165 |
| 1 | 1 | 0 | 1 | 0 | 0 | 161 | 2.5 | 165 |
| 1 | 1 | 0 | 1 | 0 | 0 | 162 | 2.5 | 165 |
| 1 | 1 | 0 | 1 | 0 | 0 | 163 | 2.5 | 165 |
| 1 | 1 | 0 | 1 | 0 | 0 | 164 | 2.5 | 165 |
| 1 | 1 | 0 | 1 | 0 | 0 | 165 | 2.5 | 165 |
| 1 | 1 | 0 | 1 | 0 | 0 | 166 | 2.5 | 165 |
| 1 | 1 | 0 | 1 | 0 | 0 | 167 | 2.5 | 165 |
| 1 | 1 | 0 | 1 | 0 | 0 | 168 | 2.5 | 165 |
| 1 | 1 | 0 | 1 | 0 | 0 | 169 | 2.5 | 165 |
| 1 | 1 | 0 | 1 | 0 | 0 | 170 | 2.5 | 165 |
| 1 | 1 | 0 | 1 | 0 | 0 | 171 | 2.5 | 165 |
| 1 | 1 | 0 | 1 | 0 | 0 | 172 | 2.5 | 165 |
| 1 | 1 | 0 | 1 | 0 | 0 | 173 | 2.5 | 165 |
| 1 | 1 | 0 | 1 | 0 | 0 | 174 | 2.5 | 165 |
| 1 | 1 | 0 | 1 | 0 | 0 | 175 | 2.5 | 165 |

|   |   |   |   |   |   |     |     |     |
|---|---|---|---|---|---|-----|-----|-----|
| 1 | 1 | 0 | 1 | 0 | 0 | 176 | 2.5 | 165 |
| 1 | 1 | 0 | 1 | 0 | 0 | 177 | 2.5 | 165 |
| 1 | 1 | 0 | 1 | 0 | 0 | 178 | 2.5 | 165 |
| 1 | 1 | 0 | 1 | 0 | 0 | 179 | 2.5 | 165 |
| 1 | 1 | 0 | 1 | 0 | 0 | 180 | 2.5 | 180 |
| 1 | 1 | 0 | 0 | 1 | 0 | 61  | 2.5 | 75  |
| 1 | 1 | 0 | 0 | 1 | 0 | 62  | 2.5 | 75  |
| 1 | 1 | 0 | 0 | 1 | 0 | 63  | 2.5 | 75  |
| 1 | 1 | 0 | 0 | 1 | 0 | 64  | 2.5 | 75  |
| 1 | 1 | 0 | 0 | 1 | 0 | 65  | 2.5 | 75  |
| 1 | 1 | 0 | 0 | 1 | 0 | 66  | 2.5 | 75  |
| 1 | 1 | 0 | 0 | 1 | 0 | 67  | 2.5 | 75  |
| 1 | 1 | 0 | 0 | 1 | 0 | 68  | 2.5 | 75  |
| 1 | 1 | 0 | 0 | 1 | 0 | 69  | 2.5 | 75  |
| 1 | 1 | 0 | 0 | 1 | 0 | 70  | 2.5 | 75  |
| 1 | 1 | 0 | 0 | 1 | 0 | 71  | 2.5 | 75  |
| 1 | 1 | 0 | 0 | 1 | 0 | 72  | 2.5 | 75  |
| 1 | 1 | 0 | 0 | 1 | 0 | 73  | 2.5 | 75  |
| 1 | 1 | 0 | 0 | 1 | 0 | 74  | 2.5 | 75  |
| 1 | 1 | 0 | 0 | 1 | 0 | 75  | 2.5 | 75  |
| 1 | 1 | 0 | 0 | 1 | 0 | 76  | 2.5 | 75  |
| 1 | 1 | 0 | 0 | 1 | 0 | 77  | 2.5 | 75  |
| 1 | 1 | 0 | 0 | 1 | 0 | 78  | 2.5 | 75  |
| 1 | 1 | 0 | 0 | 1 | 0 | 79  | 2.5 | 75  |
| 1 | 1 | 0 | 0 | 1 | 0 | 80  | 2.5 | 75  |
| 1 | 1 | 0 | 0 | 1 | 0 | 81  | 2.5 | 75  |
| 1 | 1 | 0 | 0 | 1 | 0 | 82  | 2.5 | 75  |
| 1 | 1 | 0 | 0 | 1 | 0 | 83  | 2.5 | 75  |
| 1 | 1 | 0 | 0 | 1 | 0 | 84  | 2.5 | 75  |
| 1 | 1 | 0 | 0 | 1 | 0 | 85  | 2.5 | 75  |
| 1 | 1 | 0 | 0 | 1 | 0 | 86  | 2.5 | 75  |
| 1 | 1 | 0 | 0 | 1 | 0 | 87  | 2.5 | 75  |
| 1 | 1 | 0 | 0 | 1 | 0 | 88  | 2.5 | 75  |
| 1 | 1 | 0 | 0 | 1 | 0 | 89  | 2.5 | 75  |
| 1 | 1 | 0 | 0 | 1 | 0 | 90  | 2.5 | 90  |
| 1 | 1 | 0 | 0 | 1 | 0 | 91  | 2.5 | 105 |
| 1 | 1 | 0 | 0 | 1 | 0 | 92  | 2.5 | 105 |
| 1 | 1 | 0 | 0 | 1 | 0 | 93  | 2.5 | 105 |
| 1 | 1 | 0 | 0 | 1 | 0 | 94  | 2.5 | 105 |
| 1 | 1 | 0 | 0 | 1 | 0 | 95  | 2.5 | 105 |
| 1 | 1 | 0 | 0 | 1 | 0 | 96  | 2.5 | 105 |
| 1 | 1 | 0 | 0 | 1 | 0 | 97  | 2.5 | 105 |
| 1 | 1 | 0 | 0 | 1 | 0 | 98  | 2.5 | 105 |
| 1 | 1 | 0 | 0 | 1 | 0 | 99  | 2.5 | 105 |
| 1 | 1 | 0 | 0 | 1 | 0 | 100 | 2.5 | 105 |
| 1 | 1 | 0 | 0 | 1 | 0 | 101 | 2.5 | 105 |

|   |   |   |   |   |   |     |     |     |
|---|---|---|---|---|---|-----|-----|-----|
| 1 | 1 | 0 | 0 | 1 | 0 | 102 | 2.5 | 105 |
| 1 | 1 | 0 | 0 | 1 | 0 | 103 | 2.5 | 105 |
| 1 | 1 | 0 | 0 | 1 | 0 | 104 | 2.5 | 105 |
| 1 | 1 | 0 | 0 | 1 | 0 | 105 | 2.5 | 105 |
| 1 | 1 | 0 | 0 | 1 | 0 | 106 | 2.5 | 105 |
| 1 | 1 | 0 | 0 | 1 | 0 | 107 | 2.5 | 105 |
| 1 | 1 | 0 | 0 | 1 | 0 | 108 | 2.5 | 105 |
| 1 | 1 | 0 | 0 | 1 | 0 | 109 | 2.5 | 105 |
| 1 | 1 | 0 | 0 | 1 | 0 | 110 | 2.5 | 105 |
| 1 | 1 | 0 | 0 | 1 | 0 | 111 | 2.5 | 105 |
| 1 | 1 | 0 | 0 | 1 | 0 | 112 | 2.5 | 105 |
| 1 | 1 | 0 | 0 | 1 | 0 | 113 | 2.5 | 105 |
| 1 | 1 | 0 | 0 | 1 | 0 | 114 | 2.5 | 105 |
| 1 | 1 | 0 | 0 | 1 | 0 | 115 | 2.5 | 105 |
| 1 | 1 | 0 | 0 | 1 | 0 | 116 | 2.5 | 105 |
| 1 | 1 | 0 | 0 | 1 | 0 | 117 | 2.5 | 105 |
| 1 | 1 | 0 | 0 | 1 | 0 | 118 | 2.5 | 105 |
| 1 | 1 | 0 | 0 | 1 | 0 | 119 | 2.5 | 105 |
| 1 | 1 | 0 | 0 | 1 | 0 | 151 | 2.5 | 165 |
| 1 | 1 | 0 | 0 | 1 | 0 | 152 | 2.5 | 165 |
| 1 | 1 | 0 | 0 | 1 | 0 | 153 | 2.5 | 165 |
| 1 | 1 | 0 | 0 | 1 | 0 | 154 | 2.5 | 165 |
| 1 | 1 | 0 | 0 | 1 | 0 | 155 | 2.5 | 165 |
| 1 | 1 | 0 | 0 | 1 | 0 | 156 | 2.5 | 165 |
| 1 | 1 | 0 | 0 | 1 | 0 | 157 | 2.5 | 165 |
| 1 | 1 | 0 | 0 | 1 | 0 | 158 | 2.5 | 165 |
| 1 | 1 | 0 | 0 | 1 | 0 | 159 | 2.5 | 165 |
| 1 | 1 | 0 | 0 | 1 | 0 | 160 | 2.5 | 165 |
| 1 | 1 | 0 | 0 | 1 | 0 | 161 | 2.5 | 165 |
| 1 | 1 | 0 | 0 | 1 | 0 | 162 | 2.5 | 165 |
| 1 | 1 | 0 | 0 | 1 | 0 | 163 | 2.5 | 165 |
| 1 | 1 | 0 | 0 | 1 | 0 | 164 | 2.5 | 165 |
| 1 | 1 | 0 | 0 | 1 | 0 | 165 | 2.5 | 165 |
| 1 | 1 | 0 | 0 | 1 | 0 | 166 | 2.5 | 165 |
| 1 | 1 | 0 | 0 | 1 | 0 | 167 | 2.5 | 165 |
| 1 | 1 | 0 | 0 | 1 | 0 | 168 | 2.5 | 165 |
| 1 | 1 | 0 | 0 | 1 | 0 | 169 | 2.5 | 165 |
| 1 | 1 | 0 | 0 | 1 | 0 | 170 | 2.5 | 165 |
| 1 | 1 | 0 | 0 | 1 | 0 | 171 | 2.5 | 165 |
| 1 | 1 | 0 | 0 | 1 | 0 | 172 | 2.5 | 165 |
| 1 | 1 | 0 | 0 | 1 | 0 | 173 | 2.5 | 165 |
| 1 | 1 | 0 | 0 | 1 | 0 | 174 | 2.5 | 165 |
| 1 | 1 | 0 | 0 | 1 | 0 | 175 | 2.5 | 165 |
| 1 | 1 | 0 | 0 | 1 | 0 | 176 | 2.5 | 165 |
| 1 | 1 | 0 | 0 | 1 | 0 | 177 | 2.5 | 165 |
| 1 | 1 | 0 | 0 | 1 | 0 | 178 | 2.5 | 165 |
| 1 | 1 | 0 | 0 | 1 | 0 | 179 | 2.5 | 165 |

|   |   |   |   |   |   |     |     |     |
|---|---|---|---|---|---|-----|-----|-----|
| 1 | 1 | 0 | 0 | 1 | 0 | 180 | 2.5 | 180 |
| 1 | 1 | 0 | 0 | 0 | 1 | 61  | 2.5 | 75  |
| 1 | 1 | 0 | 0 | 0 | 1 | 62  | 2.5 | 75  |
| 1 | 1 | 0 | 0 | 0 | 1 | 63  | 2.5 | 75  |
| 1 | 1 | 0 | 0 | 0 | 1 | 64  | 2.5 | 75  |
| 1 | 1 | 0 | 0 | 0 | 1 | 65  | 2.5 | 75  |
| 1 | 1 | 0 | 0 | 0 | 1 | 66  | 2.5 | 75  |
| 1 | 1 | 0 | 0 | 0 | 1 | 67  | 2.5 | 75  |
| 1 | 1 | 0 | 0 | 0 | 1 | 68  | 2.5 | 75  |
| 1 | 1 | 0 | 0 | 0 | 1 | 69  | 2.5 | 75  |
| 1 | 1 | 0 | 0 | 0 | 1 | 70  | 2.5 | 75  |
| 1 | 1 | 0 | 0 | 0 | 1 | 71  | 2.5 | 75  |
| 1 | 1 | 0 | 0 | 0 | 1 | 72  | 2.5 | 75  |
| 1 | 1 | 0 | 0 | 0 | 1 | 73  | 2.5 | 75  |
| 1 | 1 | 0 | 0 | 0 | 1 | 74  | 2.5 | 75  |
| 1 | 1 | 0 | 0 | 0 | 1 | 75  | 2.5 | 75  |
| 1 | 1 | 0 | 0 | 0 | 1 | 76  | 2.5 | 75  |
| 1 | 1 | 0 | 0 | 0 | 1 | 77  | 2.5 | 75  |
| 1 | 1 | 0 | 0 | 0 | 1 | 78  | 2.5 | 75  |
| 1 | 1 | 0 | 0 | 0 | 1 | 79  | 2.5 | 75  |
| 1 | 1 | 0 | 0 | 0 | 1 | 80  | 2.5 | 75  |
| 1 | 1 | 0 | 0 | 0 | 1 | 81  | 2.5 | 75  |
| 1 | 1 | 0 | 0 | 0 | 1 | 82  | 2.5 | 75  |
| 1 | 1 | 0 | 0 | 0 | 1 | 83  | 2.5 | 75  |
| 1 | 1 | 0 | 0 | 0 | 1 | 84  | 2.5 | 75  |
| 1 | 1 | 0 | 0 | 0 | 1 | 85  | 2.5 | 75  |
| 1 | 1 | 0 | 0 | 0 | 1 | 86  | 2.5 | 75  |
| 1 | 1 | 0 | 0 | 0 | 1 | 87  | 2.5 | 75  |
| 1 | 1 | 0 | 0 | 0 | 1 | 88  | 2.5 | 75  |
| 1 | 1 | 0 | 0 | 0 | 1 | 89  | 2.5 | 75  |
| 1 | 1 | 0 | 0 | 0 | 1 | 90  | 2.5 | 90  |
| 1 | 1 | 0 | 0 | 0 | 1 | 91  | 2.5 | 105 |
| 1 | 1 | 0 | 0 | 0 | 1 | 92  | 2.5 | 105 |
| 1 | 1 | 0 | 0 | 0 | 1 | 93  | 2.5 | 105 |
| 1 | 1 | 0 | 0 | 0 | 1 | 94  | 2.5 | 105 |
| 1 | 1 | 0 | 0 | 0 | 1 | 95  | 2.5 | 105 |
| 1 | 1 | 0 | 0 | 0 | 1 | 96  | 2.5 | 105 |
| 1 | 1 | 0 | 0 | 0 | 1 | 97  | 2.5 | 105 |
| 1 | 1 | 0 | 0 | 0 | 1 | 98  | 2.5 | 105 |
| 1 | 1 | 0 | 0 | 0 | 1 | 99  | 2.5 | 105 |
| 1 | 1 | 0 | 0 | 0 | 1 | 100 | 2.5 | 105 |
| 1 | 1 | 0 | 0 | 0 | 1 | 101 | 2.5 | 105 |
| 1 | 1 | 0 | 0 | 0 | 1 | 102 | 2.5 | 105 |
| 1 | 1 | 0 | 0 | 0 | 1 | 103 | 2.5 | 105 |
| 1 | 1 | 0 | 0 | 0 | 1 | 104 | 2.5 | 105 |
| 1 | 1 | 0 | 0 | 0 | 1 | 105 | 2.5 | 105 |

|   |   |   |   |   |   |     |     |     |
|---|---|---|---|---|---|-----|-----|-----|
| 1 | 1 | 0 | 0 | 0 | 1 | 106 | 2.5 | 105 |
| 1 | 1 | 0 | 0 | 0 | 1 | 107 | 2.5 | 105 |
| 1 | 1 | 0 | 0 | 0 | 1 | 108 | 2.5 | 105 |
| 1 | 1 | 0 | 0 | 0 | 1 | 109 | 2.5 | 105 |
| 1 | 1 | 0 | 0 | 0 | 1 | 110 | 2.5 | 105 |
| 1 | 1 | 0 | 0 | 0 | 1 | 111 | 2.5 | 105 |
| 1 | 1 | 0 | 0 | 0 | 1 | 112 | 2.5 | 105 |
| 1 | 1 | 0 | 0 | 0 | 1 | 113 | 2.5 | 105 |
| 1 | 1 | 0 | 0 | 0 | 1 | 114 | 2.5 | 105 |
| 1 | 1 | 0 | 0 | 0 | 1 | 115 | 2.5 | 105 |
| 1 | 1 | 0 | 0 | 0 | 1 | 116 | 2.5 | 105 |
| 1 | 1 | 0 | 0 | 0 | 1 | 117 | 2.5 | 105 |
| 1 | 1 | 0 | 0 | 0 | 1 | 118 | 2.5 | 105 |
| 1 | 1 | 0 | 0 | 0 | 1 | 119 | 2.5 | 105 |
| 1 | 1 | 0 | 0 | 0 | 1 | 120 | 2.5 | 120 |
| 1 | 1 | 0 | 0 | 0 | 1 | 121 | 2.5 | 135 |
| 1 | 1 | 0 | 0 | 0 | 1 | 122 | 2.5 | 135 |
| 1 | 1 | 0 | 0 | 0 | 1 | 123 | 2.5 | 135 |
| 1 | 1 | 0 | 0 | 0 | 1 | 124 | 2.5 | 135 |
| 1 | 1 | 0 | 0 | 0 | 1 | 125 | 2.5 | 135 |
| 1 | 1 | 0 | 0 | 0 | 1 | 126 | 2.5 | 135 |
| 1 | 1 | 0 | 0 | 0 | 1 | 127 | 2.5 | 135 |
| 1 | 1 | 0 | 0 | 0 | 1 | 128 | 2.5 | 135 |
| 1 | 1 | 0 | 0 | 0 | 1 | 129 | 2.5 | 135 |
| 1 | 1 | 0 | 0 | 0 | 1 | 130 | 2.5 | 135 |
| 1 | 1 | 0 | 0 | 0 | 1 | 131 | 2.5 | 135 |
| 1 | 1 | 0 | 0 | 0 | 1 | 132 | 2.5 | 135 |
| 1 | 1 | 0 | 0 | 0 | 1 | 133 | 2.5 | 135 |
| 1 | 1 | 0 | 0 | 0 | 1 | 134 | 2.5 | 135 |
| 1 | 1 | 0 | 0 | 0 | 1 | 135 | 2.5 | 135 |
| 1 | 1 | 0 | 0 | 0 | 1 | 136 | 2.5 | 135 |
| 1 | 1 | 0 | 0 | 0 | 1 | 137 | 2.5 | 135 |
| 1 | 1 | 0 | 0 | 0 | 1 | 138 | 2.5 | 135 |
| 1 | 1 | 0 | 0 | 0 | 1 | 139 | 2.5 | 135 |
| 1 | 1 | 0 | 0 | 0 | 1 | 140 | 2.5 | 135 |
| 1 | 1 | 0 | 0 | 0 | 1 | 141 | 2.5 | 135 |
| 1 | 1 | 0 | 0 | 0 | 1 | 142 | 2.5 | 135 |
| 1 | 1 | 0 | 0 | 0 | 1 | 143 | 2.5 | 135 |
| 1 | 1 | 0 | 0 | 0 | 1 | 144 | 2.5 | 135 |
| 1 | 1 | 0 | 0 | 0 | 1 | 145 | 2.5 | 135 |
| 1 | 1 | 0 | 0 | 0 | 1 | 146 | 2.5 | 135 |
| 1 | 1 | 0 | 0 | 0 | 1 | 147 | 2.5 | 135 |
| 1 | 1 | 0 | 0 | 0 | 1 | 148 | 2.5 | 135 |
| 1 | 1 | 0 | 0 | 0 | 1 | 149 | 2.5 | 135 |
| 1 | 0 | 1 | 1 | 0 | 0 | 31  | 2.5 | 45  |
| 1 | 0 | 1 | 1 | 0 | 0 | 32  | 2.5 | 45  |

|   |   |   |   |   |   |     |     |     |
|---|---|---|---|---|---|-----|-----|-----|
| 1 | 0 | 1 | 1 | 0 | 0 | 33  | 2.5 | 45  |
| 1 | 0 | 1 | 1 | 0 | 0 | 34  | 2.5 | 45  |
| 1 | 0 | 1 | 1 | 0 | 0 | 35  | 2.5 | 45  |
| 1 | 0 | 1 | 1 | 0 | 0 | 36  | 2.5 | 45  |
| 1 | 0 | 1 | 1 | 0 | 0 | 37  | 2.5 | 45  |
| 1 | 0 | 1 | 1 | 0 | 0 | 38  | 2.5 | 45  |
| 1 | 0 | 1 | 1 | 0 | 0 | 39  | 2.5 | 45  |
| 1 | 0 | 1 | 1 | 0 | 0 | 40  | 2.5 | 45  |
| 1 | 0 | 1 | 1 | 0 | 0 | 41  | 2.5 | 45  |
| 1 | 0 | 1 | 1 | 0 | 0 | 42  | 2.5 | 45  |
| 1 | 0 | 1 | 1 | 0 | 0 | 43  | 2.5 | 45  |
| 1 | 0 | 1 | 1 | 0 | 0 | 44  | 2.5 | 45  |
| 1 | 0 | 1 | 1 | 0 | 0 | 45  | 2.5 | 45  |
| 1 | 0 | 1 | 1 | 0 | 0 | 46  | 2.5 | 45  |
| 1 | 0 | 1 | 1 | 0 | 0 | 47  | 2.5 | 45  |
| 1 | 0 | 1 | 1 | 0 | 0 | 48  | 2.5 | 45  |
| 1 | 0 | 1 | 1 | 0 | 0 | 49  | 2.5 | 45  |
| 1 | 0 | 1 | 1 | 0 | 0 | 50  | 2.5 | 45  |
| 1 | 0 | 1 | 1 | 0 | 0 | 51  | 2.5 | 45  |
| 1 | 0 | 1 | 1 | 0 | 0 | 52  | 2.5 | 45  |
| 1 | 0 | 1 | 1 | 0 | 0 | 53  | 2.5 | 45  |
| 1 | 0 | 1 | 1 | 0 | 0 | 54  | 2.5 | 45  |
| 1 | 0 | 1 | 1 | 0 | 0 | 55  | 2.5 | 45  |
| 1 | 0 | 1 | 1 | 0 | 0 | 56  | 2.5 | 45  |
| 1 | 0 | 1 | 1 | 0 | 0 | 57  | 2.5 | 45  |
| 1 | 0 | 1 | 1 | 0 | 0 | 58  | 2.5 | 45  |
| 1 | 0 | 1 | 1 | 0 | 0 | 59  | 2.5 | 45  |
| 1 | 0 | 1 | 1 | 0 | 0 | 121 | 2.5 | 135 |
| 1 | 0 | 1 | 1 | 0 | 0 | 122 | 2.5 | 135 |
| 1 | 0 | 1 | 1 | 0 | 0 | 123 | 2.5 | 135 |
| 1 | 0 | 1 | 1 | 0 | 0 | 124 | 2.5 | 135 |
| 1 | 0 | 1 | 1 | 0 | 0 | 125 | 2.5 | 135 |
| 1 | 0 | 1 | 1 | 0 | 0 | 126 | 2.5 | 135 |
| 1 | 0 | 1 | 1 | 0 | 0 | 127 | 2.5 | 135 |
| 1 | 0 | 1 | 1 | 0 | 0 | 128 | 2.5 | 135 |
| 1 | 0 | 1 | 1 | 0 | 0 | 129 | 2.5 | 135 |
| 1 | 0 | 1 | 1 | 0 | 0 | 130 | 2.5 | 135 |
| 1 | 0 | 1 | 1 | 0 | 0 | 131 | 2.5 | 135 |
| 1 | 0 | 1 | 1 | 0 | 0 | 132 | 2.5 | 135 |
| 1 | 0 | 1 | 1 | 0 | 0 | 133 | 2.5 | 135 |
| 1 | 0 | 1 | 1 | 0 | 0 | 134 | 2.5 | 135 |
| 1 | 0 | 1 | 1 | 0 | 0 | 135 | 2.5 | 135 |
| 1 | 0 | 1 | 1 | 0 | 0 | 136 | 2.5 | 135 |
| 1 | 0 | 1 | 1 | 0 | 0 | 137 | 2.5 | 135 |
| 1 | 0 | 1 | 1 | 0 | 0 | 138 | 2.5 | 135 |
| 1 | 0 | 1 | 1 | 0 | 0 | 139 | 2.5 | 135 |
| 1 | 0 | 1 | 1 | 0 | 0 | 140 | 2.5 | 135 |

|   |   |   |   |   |   |     |     |     |
|---|---|---|---|---|---|-----|-----|-----|
| 1 | 0 | 1 | 1 | 0 | 0 | 141 | 2.5 | 135 |
| 1 | 0 | 1 | 1 | 0 | 0 | 142 | 2.5 | 135 |
| 1 | 0 | 1 | 1 | 0 | 0 | 143 | 2.5 | 135 |
| 1 | 0 | 1 | 1 | 0 | 0 | 144 | 2.5 | 135 |
| 1 | 0 | 1 | 1 | 0 | 0 | 145 | 2.5 | 135 |
| 1 | 0 | 1 | 1 | 0 | 0 | 146 | 2.5 | 135 |
| 1 | 0 | 1 | 1 | 0 | 0 | 147 | 2.5 | 135 |
| 1 | 0 | 1 | 1 | 0 | 0 | 148 | 2.5 | 135 |
| 1 | 0 | 1 | 1 | 0 | 0 | 149 | 2.5 | 135 |
| 1 | 0 | 1 | 1 | 0 | 0 | 150 | 2.5 | 150 |
| 1 | 0 | 1 | 1 | 0 | 0 | 151 | 2.5 | 165 |
| 1 | 0 | 1 | 1 | 0 | 0 | 152 | 2.5 | 165 |
| 1 | 0 | 1 | 1 | 0 | 0 | 153 | 2.5 | 165 |
| 1 | 0 | 1 | 1 | 0 | 0 | 154 | 2.5 | 165 |
| 1 | 0 | 1 | 1 | 0 | 0 | 155 | 2.5 | 165 |
| 1 | 0 | 1 | 1 | 0 | 0 | 156 | 2.5 | 165 |
| 1 | 0 | 1 | 1 | 0 | 0 | 157 | 2.5 | 165 |
| 1 | 0 | 1 | 1 | 0 | 0 | 158 | 2.5 | 165 |
| 1 | 0 | 1 | 1 | 0 | 0 | 159 | 2.5 | 165 |
| 1 | 0 | 1 | 1 | 0 | 0 | 160 | 2.5 | 165 |
| 1 | 0 | 1 | 1 | 0 | 0 | 161 | 2.5 | 165 |
| 1 | 0 | 1 | 1 | 0 | 0 | 162 | 2.5 | 165 |
| 1 | 0 | 1 | 1 | 0 | 0 | 163 | 2.5 | 165 |
| 1 | 0 | 1 | 1 | 0 | 0 | 164 | 2.5 | 165 |
| 1 | 0 | 1 | 1 | 0 | 0 | 165 | 2.5 | 165 |
| 1 | 0 | 1 | 1 | 0 | 0 | 166 | 2.5 | 165 |
| 1 | 0 | 1 | 1 | 0 | 0 | 167 | 2.5 | 165 |
| 1 | 0 | 1 | 1 | 0 | 0 | 168 | 2.5 | 165 |
| 1 | 0 | 1 | 1 | 0 | 0 | 169 | 2.5 | 165 |
| 1 | 0 | 1 | 1 | 0 | 0 | 170 | 2.5 | 165 |
| 1 | 0 | 1 | 1 | 0 | 0 | 171 | 2.5 | 165 |
| 1 | 0 | 1 | 1 | 0 | 0 | 172 | 2.5 | 165 |
| 1 | 0 | 1 | 1 | 0 | 0 | 173 | 2.5 | 165 |
| 1 | 0 | 1 | 1 | 0 | 0 | 174 | 2.5 | 165 |
| 1 | 0 | 1 | 1 | 0 | 0 | 175 | 2.5 | 165 |
| 1 | 0 | 1 | 1 | 0 | 0 | 176 | 2.5 | 165 |
| 1 | 0 | 1 | 1 | 0 | 0 | 177 | 2.5 | 165 |
| 1 | 0 | 1 | 1 | 0 | 0 | 178 | 2.5 | 165 |
| 1 | 0 | 1 | 1 | 0 | 0 | 179 | 2.5 | 165 |
| 1 | 0 | 1 | 1 | 0 | 0 | 180 | 2.5 | 180 |
| 1 | 0 | 1 | 0 | 1 | 0 | 31  | 2.5 | 45  |
| 1 | 0 | 1 | 0 | 1 | 0 | 32  | 2.5 | 45  |
| 1 | 0 | 1 | 0 | 1 | 0 | 33  | 2.5 | 45  |
| 1 | 0 | 1 | 0 | 1 | 0 | 34  | 2.5 | 45  |
| 1 | 0 | 1 | 0 | 1 | 0 | 35  | 2.5 | 45  |
| 1 | 0 | 1 | 0 | 1 | 0 | 36  | 2.5 | 45  |

|   |   |   |   |   |   |     |     |     |
|---|---|---|---|---|---|-----|-----|-----|
| 1 | 0 | 1 | 0 | 1 | 0 | 37  | 2.5 | 45  |
| 1 | 0 | 1 | 0 | 1 | 0 | 38  | 2.5 | 45  |
| 1 | 0 | 1 | 0 | 1 | 0 | 39  | 2.5 | 45  |
| 1 | 0 | 1 | 0 | 1 | 0 | 40  | 2.5 | 45  |
| 1 | 0 | 1 | 0 | 1 | 0 | 41  | 2.5 | 45  |
| 1 | 0 | 1 | 0 | 1 | 0 | 42  | 2.5 | 45  |
| 1 | 0 | 1 | 0 | 1 | 0 | 43  | 2.5 | 45  |
| 1 | 0 | 1 | 0 | 1 | 0 | 44  | 2.5 | 45  |
| 1 | 0 | 1 | 0 | 1 | 0 | 45  | 2.5 | 45  |
| 1 | 0 | 1 | 0 | 1 | 0 | 46  | 2.5 | 45  |
| 1 | 0 | 1 | 0 | 1 | 0 | 47  | 2.5 | 45  |
| 1 | 0 | 1 | 0 | 1 | 0 | 48  | 2.5 | 45  |
| 1 | 0 | 1 | 0 | 1 | 0 | 49  | 2.5 | 45  |
| 1 | 0 | 1 | 0 | 1 | 0 | 50  | 2.5 | 45  |
| 1 | 0 | 1 | 0 | 1 | 0 | 51  | 2.5 | 45  |
| 1 | 0 | 1 | 0 | 1 | 0 | 52  | 2.5 | 45  |
| 1 | 0 | 1 | 0 | 1 | 0 | 53  | 2.5 | 45  |
| 1 | 0 | 1 | 0 | 1 | 0 | 54  | 2.5 | 45  |
| 1 | 0 | 1 | 0 | 1 | 0 | 55  | 2.5 | 45  |
| 1 | 0 | 1 | 0 | 1 | 0 | 56  | 2.5 | 45  |
| 1 | 0 | 1 | 0 | 1 | 0 | 57  | 2.5 | 45  |
| 1 | 0 | 1 | 0 | 1 | 0 | 58  | 2.5 | 45  |
| 1 | 0 | 1 | 0 | 1 | 0 | 59  | 2.5 | 45  |
| 1 | 0 | 1 | 0 | 1 | 0 | 91  | 2.5 | 105 |
| 1 | 0 | 1 | 0 | 1 | 0 | 92  | 2.5 | 105 |
| 1 | 0 | 1 | 0 | 1 | 0 | 93  | 2.5 | 105 |
| 1 | 0 | 1 | 0 | 1 | 0 | 94  | 2.5 | 105 |
| 1 | 0 | 1 | 0 | 1 | 0 | 95  | 2.5 | 105 |
| 1 | 0 | 1 | 0 | 1 | 0 | 96  | 2.5 | 105 |
| 1 | 0 | 1 | 0 | 1 | 0 | 97  | 2.5 | 105 |
| 1 | 0 | 1 | 0 | 1 | 0 | 98  | 2.5 | 105 |
| 1 | 0 | 1 | 0 | 1 | 0 | 99  | 2.5 | 105 |
| 1 | 0 | 1 | 0 | 1 | 0 | 100 | 2.5 | 105 |
| 1 | 0 | 1 | 0 | 1 | 0 | 101 | 2.5 | 105 |
| 1 | 0 | 1 | 0 | 1 | 0 | 102 | 2.5 | 105 |
| 1 | 0 | 1 | 0 | 1 | 0 | 103 | 2.5 | 105 |
| 1 | 0 | 1 | 0 | 1 | 0 | 104 | 2.5 | 105 |
| 1 | 0 | 1 | 0 | 1 | 0 | 105 | 2.5 | 105 |
| 1 | 0 | 1 | 0 | 1 | 0 | 106 | 2.5 | 105 |
| 1 | 0 | 1 | 0 | 1 | 0 | 107 | 2.5 | 105 |
| 1 | 0 | 1 | 0 | 1 | 0 | 108 | 2.5 | 105 |
| 1 | 0 | 1 | 0 | 1 | 0 | 109 | 2.5 | 105 |
| 1 | 0 | 1 | 0 | 1 | 0 | 110 | 2.5 | 105 |
| 1 | 0 | 1 | 0 | 1 | 0 | 111 | 2.5 | 105 |
| 1 | 0 | 1 | 0 | 1 | 0 | 112 | 2.5 | 105 |
| 1 | 0 | 1 | 0 | 1 | 0 | 113 | 2.5 | 105 |

|   |   |   |   |   |   |     |     |     |
|---|---|---|---|---|---|-----|-----|-----|
| 1 | 0 | 1 | 0 | 1 | 0 | 114 | 2.5 | 105 |
| 1 | 0 | 1 | 0 | 1 | 0 | 115 | 2.5 | 105 |
| 1 | 0 | 1 | 0 | 1 | 0 | 116 | 2.5 | 105 |
| 1 | 0 | 1 | 0 | 1 | 0 | 117 | 2.5 | 105 |
| 1 | 0 | 1 | 0 | 1 | 0 | 118 | 2.5 | 105 |
| 1 | 0 | 1 | 0 | 1 | 0 | 119 | 2.5 | 105 |
| 1 | 0 | 1 | 0 | 1 | 0 | 151 | 2.5 | 165 |
| 1 | 0 | 1 | 0 | 1 | 0 | 152 | 2.5 | 165 |
| 1 | 0 | 1 | 0 | 1 | 0 | 153 | 2.5 | 165 |
| 1 | 0 | 1 | 0 | 1 | 0 | 154 | 2.5 | 165 |
| 1 | 0 | 1 | 0 | 1 | 0 | 155 | 2.5 | 165 |
| 1 | 0 | 1 | 0 | 1 | 0 | 156 | 2.5 | 165 |
| 1 | 0 | 1 | 0 | 1 | 0 | 157 | 2.5 | 165 |
| 1 | 0 | 1 | 0 | 1 | 0 | 158 | 2.5 | 165 |
| 1 | 0 | 1 | 0 | 1 | 0 | 159 | 2.5 | 165 |
| 1 | 0 | 1 | 0 | 1 | 0 | 160 | 2.5 | 165 |
| 1 | 0 | 1 | 0 | 1 | 0 | 161 | 2.5 | 165 |
| 1 | 0 | 1 | 0 | 1 | 0 | 162 | 2.5 | 165 |
| 1 | 0 | 1 | 0 | 1 | 0 | 163 | 2.5 | 165 |
| 1 | 0 | 1 | 0 | 1 | 0 | 164 | 2.5 | 165 |
| 1 | 0 | 1 | 0 | 1 | 0 | 165 | 2.5 | 165 |
| 1 | 0 | 1 | 0 | 1 | 0 | 166 | 2.5 | 165 |
| 1 | 0 | 1 | 0 | 1 | 0 | 167 | 2.5 | 165 |
| 1 | 0 | 1 | 0 | 1 | 0 | 168 | 2.5 | 165 |
| 1 | 0 | 1 | 0 | 1 | 0 | 169 | 2.5 | 165 |
| 1 | 0 | 1 | 0 | 1 | 0 | 170 | 2.5 | 165 |
| 1 | 0 | 1 | 0 | 1 | 0 | 171 | 2.5 | 165 |
| 1 | 0 | 1 | 0 | 1 | 0 | 172 | 2.5 | 165 |
| 1 | 0 | 1 | 0 | 1 | 0 | 173 | 2.5 | 165 |
| 1 | 0 | 1 | 0 | 1 | 0 | 174 | 2.5 | 165 |
| 1 | 0 | 1 | 0 | 1 | 0 | 175 | 2.5 | 165 |
| 1 | 0 | 1 | 0 | 1 | 0 | 176 | 2.5 | 165 |
| 1 | 0 | 1 | 0 | 1 | 0 | 177 | 2.5 | 165 |
| 1 | 0 | 1 | 0 | 1 | 0 | 178 | 2.5 | 165 |
| 1 | 0 | 1 | 0 | 1 | 0 | 179 | 2.5 | 165 |
| 1 | 0 | 1 | 0 | 1 | 0 | 180 | 2.5 | 165 |
| 1 | 0 | 1 | 0 | 0 | 1 | 31  | 2.5 | 45  |
| 1 | 0 | 1 | 0 | 0 | 1 | 32  | 2.5 | 45  |
| 1 | 0 | 1 | 0 | 0 | 1 | 33  | 2.5 | 45  |
| 1 | 0 | 1 | 0 | 0 | 1 | 34  | 2.5 | 45  |
| 1 | 0 | 1 | 0 | 0 | 1 | 35  | 2.5 | 45  |
| 1 | 0 | 1 | 0 | 0 | 1 | 36  | 2.5 | 45  |
| 1 | 0 | 1 | 0 | 0 | 1 | 37  | 2.5 | 45  |
| 1 | 0 | 1 | 0 | 0 | 1 | 38  | 2.5 | 45  |
| 1 | 0 | 1 | 0 | 0 | 1 | 39  | 2.5 | 45  |
| 1 | 0 | 1 | 0 | 0 | 1 | 40  | 2.5 | 45  |

|   |   |   |   |   |   |     |     |     |
|---|---|---|---|---|---|-----|-----|-----|
| 1 | 0 | 1 | 0 | 0 | 1 | 41  | 2.5 | 45  |
| 1 | 0 | 1 | 0 | 0 | 1 | 42  | 2.5 | 45  |
| 1 | 0 | 1 | 0 | 0 | 1 | 43  | 2.5 | 45  |
| 1 | 0 | 1 | 0 | 0 | 1 | 44  | 2.5 | 45  |
| 1 | 0 | 1 | 0 | 0 | 1 | 45  | 2.5 | 45  |
| 1 | 0 | 1 | 0 | 0 | 1 | 46  | 2.5 | 45  |
| 1 | 0 | 1 | 0 | 0 | 1 | 47  | 2.5 | 45  |
| 1 | 0 | 1 | 0 | 0 | 1 | 48  | 2.5 | 45  |
| 1 | 0 | 1 | 0 | 0 | 1 | 49  | 2.5 | 45  |
| 1 | 0 | 1 | 0 | 0 | 1 | 50  | 2.5 | 45  |
| 1 | 0 | 1 | 0 | 0 | 1 | 51  | 2.5 | 45  |
| 1 | 0 | 1 | 0 | 0 | 1 | 52  | 2.5 | 45  |
| 1 | 0 | 1 | 0 | 0 | 1 | 53  | 2.5 | 45  |
| 1 | 0 | 1 | 0 | 0 | 1 | 54  | 2.5 | 45  |
| 1 | 0 | 1 | 0 | 0 | 1 | 55  | 2.5 | 45  |
| 1 | 0 | 1 | 0 | 0 | 1 | 56  | 2.5 | 45  |
| 1 | 0 | 1 | 0 | 0 | 1 | 57  | 2.5 | 45  |
| 1 | 0 | 1 | 0 | 0 | 1 | 58  | 2.5 | 45  |
| 1 | 0 | 1 | 0 | 0 | 1 | 59  | 2.5 | 45  |
| 1 | 0 | 1 | 0 | 0 | 1 | 91  | 2.5 | 105 |
| 1 | 0 | 1 | 0 | 0 | 1 | 92  | 2.5 | 105 |
| 1 | 0 | 1 | 0 | 0 | 1 | 93  | 2.5 | 105 |
| 1 | 0 | 1 | 0 | 0 | 1 | 94  | 2.5 | 105 |
| 1 | 0 | 1 | 0 | 0 | 1 | 95  | 2.5 | 105 |
| 1 | 0 | 1 | 0 | 0 | 1 | 96  | 2.5 | 105 |
| 1 | 0 | 1 | 0 | 0 | 1 | 97  | 2.5 | 105 |
| 1 | 0 | 1 | 0 | 0 | 1 | 98  | 2.5 | 105 |
| 1 | 0 | 1 | 0 | 0 | 1 | 99  | 2.5 | 105 |
| 1 | 0 | 1 | 0 | 0 | 1 | 100 | 2.5 | 105 |
| 1 | 0 | 1 | 0 | 0 | 1 | 101 | 2.5 | 105 |
| 1 | 0 | 1 | 0 | 0 | 1 | 102 | 2.5 | 105 |
| 1 | 0 | 1 | 0 | 0 | 1 | 103 | 2.5 | 105 |
| 1 | 0 | 1 | 0 | 0 | 1 | 104 | 2.5 | 105 |
| 1 | 0 | 1 | 0 | 0 | 1 | 105 | 2.5 | 105 |
| 1 | 0 | 1 | 0 | 0 | 1 | 106 | 2.5 | 105 |
| 1 | 0 | 1 | 0 | 0 | 1 | 107 | 2.5 | 105 |
| 1 | 0 | 1 | 0 | 0 | 1 | 108 | 2.5 | 105 |
| 1 | 0 | 1 | 0 | 0 | 1 | 109 | 2.5 | 105 |
| 1 | 0 | 1 | 0 | 0 | 1 | 110 | 2.5 | 105 |
| 1 | 0 | 1 | 0 | 0 | 1 | 111 | 2.5 | 105 |
| 1 | 0 | 1 | 0 | 0 | 1 | 112 | 2.5 | 105 |
| 1 | 0 | 1 | 0 | 0 | 1 | 113 | 2.5 | 105 |
| 1 | 0 | 1 | 0 | 0 | 1 | 114 | 2.5 | 105 |
| 1 | 0 | 1 | 0 | 0 | 1 | 115 | 2.5 | 105 |
| 1 | 0 | 1 | 0 | 0 | 1 | 116 | 2.5 | 105 |
| 1 | 0 | 1 | 0 | 0 | 1 | 117 | 2.5 | 105 |
| 1 | 0 | 1 | 0 | 0 | 1 | 118 | 2.5 | 105 |

|   |   |   |   |   |   |     |     |     |
|---|---|---|---|---|---|-----|-----|-----|
| 1 | 0 | 1 | 0 | 0 | 1 | 119 | 2.5 | 105 |
| 1 | 0 | 1 | 0 | 0 | 1 | 120 | 2.5 | 120 |
| 1 | 0 | 1 | 0 | 0 | 1 | 121 | 2.5 | 135 |
| 1 | 0 | 1 | 0 | 0 | 1 | 122 | 2.5 | 135 |
| 1 | 0 | 1 | 0 | 0 | 1 | 123 | 2.5 | 135 |
| 1 | 0 | 1 | 0 | 0 | 1 | 124 | 2.5 | 135 |
| 1 | 0 | 1 | 0 | 0 | 1 | 125 | 2.5 | 135 |
| 1 | 0 | 1 | 0 | 0 | 1 | 126 | 2.5 | 135 |
| 1 | 0 | 1 | 0 | 0 | 1 | 127 | 2.5 | 135 |
| 1 | 0 | 1 | 0 | 0 | 1 | 128 | 2.5 | 135 |
| 1 | 0 | 1 | 0 | 0 | 1 | 129 | 2.5 | 135 |
| 1 | 0 | 1 | 0 | 0 | 1 | 130 | 2.5 | 135 |
| 1 | 0 | 1 | 0 | 0 | 1 | 131 | 2.5 | 135 |
| 1 | 0 | 1 | 0 | 0 | 1 | 132 | 2.5 | 135 |
| 1 | 0 | 1 | 0 | 0 | 1 | 133 | 2.5 | 135 |
| 1 | 0 | 1 | 0 | 0 | 1 | 134 | 2.5 | 135 |
| 1 | 0 | 1 | 0 | 0 | 1 | 135 | 2.5 | 135 |
| 1 | 0 | 1 | 0 | 0 | 1 | 136 | 2.5 | 135 |
| 1 | 0 | 1 | 0 | 0 | 1 | 137 | 2.5 | 135 |
| 1 | 0 | 1 | 0 | 0 | 1 | 138 | 2.5 | 135 |
| 1 | 0 | 1 | 0 | 0 | 1 | 139 | 2.5 | 135 |
| 1 | 0 | 1 | 0 | 0 | 1 | 140 | 2.5 | 135 |
| 1 | 0 | 1 | 0 | 0 | 1 | 141 | 2.5 | 135 |
| 1 | 0 | 1 | 0 | 0 | 1 | 142 | 2.5 | 135 |
| 1 | 0 | 1 | 0 | 0 | 1 | 143 | 2.5 | 135 |
| 1 | 0 | 1 | 0 | 0 | 1 | 144 | 2.5 | 135 |
| 1 | 0 | 1 | 0 | 0 | 1 | 145 | 2.5 | 135 |
| 1 | 0 | 1 | 0 | 0 | 1 | 146 | 2.5 | 135 |
| 1 | 0 | 1 | 0 | 0 | 1 | 147 | 2.5 | 135 |
| 1 | 0 | 1 | 0 | 0 | 1 | 148 | 2.5 | 135 |
| 1 | 0 | 1 | 0 | 0 | 1 | 149 | 2.5 | 135 |
| 1 | 0 | 0 | 1 | 1 | 0 | 31  | 2.5 | 45  |
| 1 | 0 | 0 | 1 | 1 | 0 | 32  | 2.5 | 45  |
| 1 | 0 | 0 | 1 | 1 | 0 | 33  | 2.5 | 45  |
| 1 | 0 | 0 | 1 | 1 | 0 | 34  | 2.5 | 45  |
| 1 | 0 | 0 | 1 | 1 | 0 | 35  | 2.5 | 45  |
| 1 | 0 | 0 | 1 | 1 | 0 | 36  | 2.5 | 45  |
| 1 | 0 | 0 | 1 | 1 | 0 | 37  | 2.5 | 45  |
| 1 | 0 | 0 | 1 | 1 | 0 | 38  | 2.5 | 45  |
| 1 | 0 | 0 | 1 | 1 | 0 | 39  | 2.5 | 45  |
| 1 | 0 | 0 | 1 | 1 | 0 | 40  | 2.5 | 45  |
| 1 | 0 | 0 | 1 | 1 | 0 | 41  | 2.5 | 45  |
| 1 | 0 | 0 | 1 | 1 | 0 | 42  | 2.5 | 45  |
| 1 | 0 | 0 | 1 | 1 | 0 | 43  | 2.5 | 45  |
| 1 | 0 | 0 | 1 | 1 | 0 | 44  | 2.5 | 45  |
| 1 | 0 | 0 | 1 | 1 | 0 | 45  | 2.5 | 45  |

|   |   |   |   |   |   |     |     |     |
|---|---|---|---|---|---|-----|-----|-----|
| 1 | 0 | 0 | 1 | 1 | 0 | 46  | 2.5 | 45  |
| 1 | 0 | 0 | 1 | 1 | 0 | 47  | 2.5 | 45  |
| 1 | 0 | 0 | 1 | 1 | 0 | 48  | 2.5 | 45  |
| 1 | 0 | 0 | 1 | 1 | 0 | 49  | 2.5 | 45  |
| 1 | 0 | 0 | 1 | 1 | 0 | 50  | 2.5 | 45  |
| 1 | 0 | 0 | 1 | 1 | 0 | 51  | 2.5 | 45  |
| 1 | 0 | 0 | 1 | 1 | 0 | 52  | 2.5 | 45  |
| 1 | 0 | 0 | 1 | 1 | 0 | 53  | 2.5 | 45  |
| 1 | 0 | 0 | 1 | 1 | 0 | 54  | 2.5 | 45  |
| 1 | 0 | 0 | 1 | 1 | 0 | 55  | 2.5 | 45  |
| 1 | 0 | 0 | 1 | 1 | 0 | 56  | 2.5 | 45  |
| 1 | 0 | 0 | 1 | 1 | 0 | 57  | 2.5 | 45  |
| 1 | 0 | 0 | 1 | 1 | 0 | 58  | 2.5 | 45  |
| 1 | 0 | 0 | 1 | 1 | 0 | 59  | 2.5 | 45  |
| 1 | 0 | 0 | 1 | 1 | 0 | 60  | 2.5 | 60  |
| 1 | 0 | 0 | 1 | 1 | 0 | 61  | 2.5 | 75  |
| 1 | 0 | 0 | 1 | 1 | 0 | 62  | 2.5 | 75  |
| 1 | 0 | 0 | 1 | 1 | 0 | 63  | 2.5 | 75  |
| 1 | 0 | 0 | 1 | 1 | 0 | 64  | 2.5 | 75  |
| 1 | 0 | 0 | 1 | 1 | 0 | 65  | 2.5 | 75  |
| 1 | 0 | 0 | 1 | 1 | 0 | 66  | 2.5 | 75  |
| 1 | 0 | 0 | 1 | 1 | 0 | 67  | 2.5 | 75  |
| 1 | 0 | 0 | 1 | 1 | 0 | 68  | 2.5 | 75  |
| 1 | 0 | 0 | 1 | 1 | 0 | 69  | 2.5 | 75  |
| 1 | 0 | 0 | 1 | 1 | 0 | 70  | 2.5 | 75  |
| 1 | 0 | 0 | 1 | 1 | 0 | 71  | 2.5 | 75  |
| 1 | 0 | 0 | 1 | 1 | 0 | 72  | 2.5 | 75  |
| 1 | 0 | 0 | 1 | 1 | 0 | 73  | 2.5 | 75  |
| 1 | 0 | 0 | 1 | 1 | 0 | 74  | 2.5 | 75  |
| 1 | 0 | 0 | 1 | 1 | 0 | 75  | 2.5 | 75  |
| 1 | 0 | 0 | 1 | 1 | 0 | 76  | 2.5 | 75  |
| 1 | 0 | 0 | 1 | 1 | 0 | 77  | 2.5 | 75  |
| 1 | 0 | 0 | 1 | 1 | 0 | 78  | 2.5 | 75  |
| 1 | 0 | 0 | 1 | 1 | 0 | 79  | 2.5 | 75  |
| 1 | 0 | 0 | 1 | 1 | 0 | 80  | 2.5 | 75  |
| 1 | 0 | 0 | 1 | 1 | 0 | 81  | 2.5 | 75  |
| 1 | 0 | 0 | 1 | 1 | 0 | 82  | 2.5 | 75  |
| 1 | 0 | 0 | 1 | 1 | 0 | 83  | 2.5 | 75  |
| 1 | 0 | 0 | 1 | 1 | 0 | 84  | 2.5 | 75  |
| 1 | 0 | 0 | 1 | 1 | 0 | 85  | 2.5 | 75  |
| 1 | 0 | 0 | 1 | 1 | 0 | 86  | 2.5 | 75  |
| 1 | 0 | 0 | 1 | 1 | 0 | 87  | 2.5 | 75  |
| 1 | 0 | 0 | 1 | 1 | 0 | 88  | 2.5 | 75  |
| 1 | 0 | 0 | 1 | 1 | 0 | 89  | 2.5 | 75  |
| 1 | 0 | 0 | 1 | 1 | 0 | 151 | 2.5 | 165 |
| 1 | 0 | 0 | 1 | 1 | 0 | 152 | 2.5 | 165 |

|   |   |   |   |   |   |     |     |     |
|---|---|---|---|---|---|-----|-----|-----|
| 1 | 0 | 0 | 1 | 1 | 0 | 153 | 2.5 | 165 |
| 1 | 0 | 0 | 1 | 1 | 0 | 154 | 2.5 | 165 |
| 1 | 0 | 0 | 1 | 1 | 0 | 155 | 2.5 | 165 |
| 1 | 0 | 0 | 1 | 1 | 0 | 156 | 2.5 | 165 |
| 1 | 0 | 0 | 1 | 1 | 0 | 157 | 2.5 | 165 |
| 1 | 0 | 0 | 1 | 1 | 0 | 158 | 2.5 | 165 |
| 1 | 0 | 0 | 1 | 1 | 0 | 159 | 2.5 | 165 |
| 1 | 0 | 0 | 1 | 1 | 0 | 160 | 2.5 | 165 |
| 1 | 0 | 0 | 1 | 1 | 0 | 161 | 2.5 | 165 |
| 1 | 0 | 0 | 1 | 1 | 0 | 162 | 2.5 | 165 |
| 1 | 0 | 0 | 1 | 1 | 0 | 163 | 2.5 | 165 |
| 1 | 0 | 0 | 1 | 1 | 0 | 164 | 2.5 | 165 |
| 1 | 0 | 0 | 1 | 1 | 0 | 165 | 2.5 | 165 |
| 1 | 0 | 0 | 1 | 1 | 0 | 166 | 2.5 | 165 |
| 1 | 0 | 0 | 1 | 1 | 0 | 167 | 2.5 | 165 |
| 1 | 0 | 0 | 1 | 1 | 0 | 168 | 2.5 | 165 |
| 1 | 0 | 0 | 1 | 1 | 0 | 169 | 2.5 | 165 |
| 1 | 0 | 0 | 1 | 1 | 0 | 170 | 2.5 | 165 |
| 1 | 0 | 0 | 1 | 1 | 0 | 171 | 2.5 | 165 |
| 1 | 0 | 0 | 1 | 1 | 0 | 172 | 2.5 | 165 |
| 1 | 0 | 0 | 1 | 1 | 0 | 173 | 2.5 | 165 |
| 1 | 0 | 0 | 1 | 1 | 0 | 174 | 2.5 | 165 |
| 1 | 0 | 0 | 1 | 1 | 0 | 175 | 2.5 | 165 |
| 1 | 0 | 0 | 1 | 1 | 0 | 176 | 2.5 | 165 |
| 1 | 0 | 0 | 1 | 1 | 0 | 177 | 2.5 | 165 |
| 1 | 0 | 0 | 1 | 1 | 0 | 178 | 2.5 | 165 |
| 1 | 0 | 0 | 1 | 1 | 0 | 179 | 2.5 | 165 |
| 1 | 0 | 0 | 1 | 1 | 0 | 180 | 2.5 | 165 |
| 1 | 0 | 0 | 1 | 0 | 1 | 31  | 2.5 | 45  |
| 1 | 0 | 0 | 1 | 0 | 1 | 32  | 2.5 | 45  |
| 1 | 0 | 0 | 1 | 0 | 1 | 33  | 2.5 | 45  |
| 1 | 0 | 0 | 1 | 0 | 1 | 34  | 2.5 | 45  |
| 1 | 0 | 0 | 1 | 0 | 1 | 35  | 2.5 | 45  |
| 1 | 0 | 0 | 1 | 0 | 1 | 36  | 2.5 | 45  |
| 1 | 0 | 0 | 1 | 0 | 1 | 37  | 2.5 | 45  |
| 1 | 0 | 0 | 1 | 0 | 1 | 38  | 2.5 | 45  |
| 1 | 0 | 0 | 1 | 0 | 1 | 39  | 2.5 | 45  |
| 1 | 0 | 0 | 1 | 0 | 1 | 40  | 2.5 | 45  |
| 1 | 0 | 0 | 1 | 0 | 1 | 41  | 2.5 | 45  |
| 1 | 0 | 0 | 1 | 0 | 1 | 42  | 2.5 | 45  |
| 1 | 0 | 0 | 1 | 0 | 1 | 43  | 2.5 | 45  |
| 1 | 0 | 0 | 1 | 0 | 1 | 44  | 2.5 | 45  |
| 1 | 0 | 0 | 1 | 0 | 1 | 45  | 2.5 | 45  |
| 1 | 0 | 0 | 1 | 0 | 1 | 46  | 2.5 | 45  |
| 1 | 0 | 0 | 1 | 0 | 1 | 47  | 2.5 | 45  |
| 1 | 0 | 0 | 1 | 0 | 1 | 48  | 2.5 | 45  |
| 1 | 0 | 0 | 1 | 0 | 1 | 49  | 2.5 | 45  |

|   |   |   |   |   |   |     |     |     |
|---|---|---|---|---|---|-----|-----|-----|
| 1 | 0 | 0 | 1 | 0 | 1 | 50  | 2.5 | 45  |
| 1 | 0 | 0 | 1 | 0 | 1 | 51  | 2.5 | 45  |
| 1 | 0 | 0 | 1 | 0 | 1 | 52  | 2.5 | 45  |
| 1 | 0 | 0 | 1 | 0 | 1 | 53  | 2.5 | 45  |
| 1 | 0 | 0 | 1 | 0 | 1 | 54  | 2.5 | 45  |
| 1 | 0 | 0 | 1 | 0 | 1 | 55  | 2.5 | 45  |
| 1 | 0 | 0 | 1 | 0 | 1 | 56  | 2.5 | 45  |
| 1 | 0 | 0 | 1 | 0 | 1 | 57  | 2.5 | 45  |
| 1 | 0 | 0 | 1 | 0 | 1 | 58  | 2.5 | 45  |
| 1 | 0 | 0 | 1 | 0 | 1 | 59  | 2.5 | 45  |
| 1 | 0 | 0 | 1 | 0 | 1 | 60  | 2.5 | 60  |
| 1 | 0 | 0 | 1 | 0 | 1 | 61  | 2.5 | 75  |
| 1 | 0 | 0 | 1 | 0 | 1 | 62  | 2.5 | 75  |
| 1 | 0 | 0 | 1 | 0 | 1 | 63  | 2.5 | 75  |
| 1 | 0 | 0 | 1 | 0 | 1 | 64  | 2.5 | 75  |
| 1 | 0 | 0 | 1 | 0 | 1 | 65  | 2.5 | 75  |
| 1 | 0 | 0 | 1 | 0 | 1 | 66  | 2.5 | 75  |
| 1 | 0 | 0 | 1 | 0 | 1 | 67  | 2.5 | 75  |
| 1 | 0 | 0 | 1 | 0 | 1 | 68  | 2.5 | 75  |
| 1 | 0 | 0 | 1 | 0 | 1 | 69  | 2.5 | 75  |
| 1 | 0 | 0 | 1 | 0 | 1 | 70  | 2.5 | 75  |
| 1 | 0 | 0 | 1 | 0 | 1 | 71  | 2.5 | 75  |
| 1 | 0 | 0 | 1 | 0 | 1 | 72  | 2.5 | 75  |
| 1 | 0 | 0 | 1 | 0 | 1 | 73  | 2.5 | 75  |
| 1 | 0 | 0 | 1 | 0 | 1 | 74  | 2.5 | 75  |
| 1 | 0 | 0 | 1 | 0 | 1 | 75  | 2.5 | 75  |
| 1 | 0 | 0 | 1 | 0 | 1 | 76  | 2.5 | 75  |
| 1 | 0 | 0 | 1 | 0 | 1 | 77  | 2.5 | 75  |
| 1 | 0 | 0 | 1 | 0 | 1 | 78  | 2.5 | 75  |
| 1 | 0 | 0 | 1 | 0 | 1 | 79  | 2.5 | 75  |
| 1 | 0 | 0 | 1 | 0 | 1 | 80  | 2.5 | 75  |
| 1 | 0 | 0 | 1 | 0 | 1 | 81  | 2.5 | 75  |
| 1 | 0 | 0 | 1 | 0 | 1 | 82  | 2.5 | 75  |
| 1 | 0 | 0 | 1 | 0 | 1 | 83  | 2.5 | 75  |
| 1 | 0 | 0 | 1 | 0 | 1 | 84  | 2.5 | 75  |
| 1 | 0 | 0 | 1 | 0 | 1 | 85  | 2.5 | 75  |
| 1 | 0 | 0 | 1 | 0 | 1 | 86  | 2.5 | 75  |
| 1 | 0 | 0 | 1 | 0 | 1 | 87  | 2.5 | 75  |
| 1 | 0 | 0 | 1 | 0 | 1 | 88  | 2.5 | 75  |
| 1 | 0 | 0 | 1 | 0 | 1 | 89  | 2.5 | 75  |
| 1 | 0 | 0 | 1 | 0 | 1 | 121 | 2.5 | 135 |
| 1 | 0 | 0 | 1 | 0 | 1 | 122 | 2.5 | 135 |
| 1 | 0 | 0 | 1 | 0 | 1 | 123 | 2.5 | 135 |
| 1 | 0 | 0 | 1 | 0 | 1 | 124 | 2.5 | 135 |
| 1 | 0 | 0 | 1 | 0 | 1 | 125 | 2.5 | 135 |
| 1 | 0 | 0 | 1 | 0 | 1 | 126 | 2.5 | 135 |

|   |   |   |   |   |   |     |     |     |
|---|---|---|---|---|---|-----|-----|-----|
| 1 | 0 | 0 | 1 | 0 | 1 | 127 | 2.5 | 135 |
| 1 | 0 | 0 | 1 | 0 | 1 | 128 | 2.5 | 135 |
| 1 | 0 | 0 | 1 | 0 | 1 | 129 | 2.5 | 135 |
| 1 | 0 | 0 | 1 | 0 | 1 | 130 | 2.5 | 135 |
| 1 | 0 | 0 | 1 | 0 | 1 | 131 | 2.5 | 135 |
| 1 | 0 | 0 | 1 | 0 | 1 | 132 | 2.5 | 135 |
| 1 | 0 | 0 | 1 | 0 | 1 | 133 | 2.5 | 135 |
| 1 | 0 | 0 | 1 | 0 | 1 | 134 | 2.5 | 135 |
| 1 | 0 | 0 | 1 | 0 | 1 | 135 | 2.5 | 135 |
| 1 | 0 | 0 | 1 | 0 | 1 | 136 | 2.5 | 135 |
| 1 | 0 | 0 | 1 | 0 | 1 | 137 | 2.5 | 135 |
| 1 | 0 | 0 | 1 | 0 | 1 | 138 | 2.5 | 135 |
| 1 | 0 | 0 | 1 | 0 | 1 | 139 | 2.5 | 135 |
| 1 | 0 | 0 | 1 | 0 | 1 | 140 | 2.5 | 135 |
| 1 | 0 | 0 | 1 | 0 | 1 | 141 | 2.5 | 135 |
| 1 | 0 | 0 | 1 | 0 | 1 | 142 | 2.5 | 135 |
| 1 | 0 | 0 | 1 | 0 | 1 | 143 | 2.5 | 135 |
| 1 | 0 | 0 | 1 | 0 | 1 | 144 | 2.5 | 135 |
| 1 | 0 | 0 | 1 | 0 | 1 | 145 | 2.5 | 135 |
| 1 | 0 | 0 | 1 | 0 | 1 | 146 | 2.5 | 135 |
| 1 | 0 | 0 | 1 | 0 | 1 | 147 | 2.5 | 135 |
| 1 | 0 | 0 | 1 | 0 | 1 | 148 | 2.5 | 135 |
| 1 | 0 | 0 | 1 | 0 | 1 | 149 | 2.5 | 135 |
| 1 | 0 | 0 | 0 | 1 | 1 | 31  | 2.5 | 45  |
| 1 | 0 | 0 | 0 | 1 | 1 | 32  | 2.5 | 45  |
| 1 | 0 | 0 | 0 | 1 | 1 | 33  | 2.5 | 45  |
| 1 | 0 | 0 | 0 | 1 | 1 | 34  | 2.5 | 45  |
| 1 | 0 | 0 | 0 | 1 | 1 | 35  | 2.5 | 45  |
| 1 | 0 | 0 | 0 | 1 | 1 | 36  | 2.5 | 45  |
| 1 | 0 | 0 | 0 | 1 | 1 | 37  | 2.5 | 45  |
| 1 | 0 | 0 | 0 | 1 | 1 | 38  | 2.5 | 45  |
| 1 | 0 | 0 | 0 | 1 | 1 | 39  | 2.5 | 45  |
| 1 | 0 | 0 | 0 | 1 | 1 | 40  | 2.5 | 45  |
| 1 | 0 | 0 | 0 | 1 | 1 | 41  | 2.5 | 45  |
| 1 | 0 | 0 | 0 | 1 | 1 | 42  | 2.5 | 45  |
| 1 | 0 | 0 | 0 | 1 | 1 | 43  | 2.5 | 45  |
| 1 | 0 | 0 | 0 | 1 | 1 | 44  | 2.5 | 45  |
| 1 | 0 | 0 | 0 | 1 | 1 | 45  | 2.5 | 45  |
| 1 | 0 | 0 | 0 | 1 | 1 | 46  | 2.5 | 45  |
| 1 | 0 | 0 | 0 | 1 | 1 | 47  | 2.5 | 45  |
| 1 | 0 | 0 | 0 | 1 | 1 | 48  | 2.5 | 45  |
| 1 | 0 | 0 | 0 | 1 | 1 | 49  | 2.5 | 45  |
| 1 | 0 | 0 | 0 | 1 | 1 | 50  | 2.5 | 45  |
| 1 | 0 | 0 | 0 | 1 | 1 | 51  | 2.5 | 45  |
| 1 | 0 | 0 | 0 | 1 | 1 | 52  | 2.5 | 45  |
| 1 | 0 | 0 | 0 | 1 | 1 | 53  | 2.5 | 45  |

|   |   |   |   |   |   |     |     |     |
|---|---|---|---|---|---|-----|-----|-----|
| 1 | 0 | 0 | 0 | 1 | 1 | 54  | 2.5 | 45  |
| 1 | 0 | 0 | 0 | 1 | 1 | 55  | 2.5 | 45  |
| 1 | 0 | 0 | 0 | 1 | 1 | 56  | 2.5 | 45  |
| 1 | 0 | 0 | 0 | 1 | 1 | 57  | 2.5 | 45  |
| 1 | 0 | 0 | 0 | 1 | 1 | 58  | 2.5 | 45  |
| 1 | 0 | 0 | 0 | 1 | 1 | 59  | 2.5 | 45  |
| 1 | 0 | 0 | 0 | 1 | 1 | 60  | 2.5 | 60  |
| 1 | 0 | 0 | 0 | 1 | 1 | 61  | 2.5 | 75  |
| 1 | 0 | 0 | 0 | 1 | 1 | 62  | 2.5 | 75  |
| 1 | 0 | 0 | 0 | 1 | 1 | 63  | 2.5 | 75  |
| 1 | 0 | 0 | 0 | 1 | 1 | 64  | 2.5 | 75  |
| 1 | 0 | 0 | 0 | 1 | 1 | 65  | 2.5 | 75  |
| 1 | 0 | 0 | 0 | 1 | 1 | 66  | 2.5 | 75  |
| 1 | 0 | 0 | 0 | 1 | 1 | 67  | 2.5 | 75  |
| 1 | 0 | 0 | 0 | 1 | 1 | 68  | 2.5 | 75  |
| 1 | 0 | 0 | 0 | 1 | 1 | 69  | 2.5 | 75  |
| 1 | 0 | 0 | 0 | 1 | 1 | 70  | 2.5 | 75  |
| 1 | 0 | 0 | 0 | 1 | 1 | 71  | 2.5 | 75  |
| 1 | 0 | 0 | 0 | 1 | 1 | 72  | 2.5 | 75  |
| 1 | 0 | 0 | 0 | 1 | 1 | 73  | 2.5 | 75  |
| 1 | 0 | 0 | 0 | 1 | 1 | 74  | 2.5 | 75  |
| 1 | 0 | 0 | 0 | 1 | 1 | 75  | 2.5 | 75  |
| 1 | 0 | 0 | 0 | 1 | 1 | 76  | 2.5 | 75  |
| 1 | 0 | 0 | 0 | 1 | 1 | 77  | 2.5 | 75  |
| 1 | 0 | 0 | 0 | 1 | 1 | 78  | 2.5 | 75  |
| 1 | 0 | 0 | 0 | 1 | 1 | 79  | 2.5 | 75  |
| 1 | 0 | 0 | 0 | 1 | 1 | 80  | 2.5 | 75  |
| 1 | 0 | 0 | 0 | 1 | 1 | 81  | 2.5 | 75  |
| 1 | 0 | 0 | 0 | 1 | 1 | 82  | 2.5 | 75  |
| 1 | 0 | 0 | 0 | 1 | 1 | 83  | 2.5 | 75  |
| 1 | 0 | 0 | 0 | 1 | 1 | 84  | 2.5 | 75  |
| 1 | 0 | 0 | 0 | 1 | 1 | 85  | 2.5 | 75  |
| 1 | 0 | 0 | 0 | 1 | 1 | 86  | 2.5 | 75  |
| 1 | 0 | 0 | 0 | 1 | 1 | 87  | 2.5 | 75  |
| 1 | 0 | 0 | 0 | 1 | 1 | 88  | 2.5 | 75  |
| 1 | 0 | 0 | 0 | 1 | 1 | 89  | 2.5 | 75  |
| 1 | 0 | 0 | 0 | 1 | 1 | 90  | 2.5 | 90  |
| 1 | 0 | 0 | 0 | 1 | 1 | 91  | 2.5 | 105 |
| 1 | 0 | 0 | 0 | 1 | 1 | 92  | 2.5 | 105 |
| 1 | 0 | 0 | 0 | 1 | 1 | 93  | 2.5 | 105 |
| 1 | 0 | 0 | 0 | 1 | 1 | 94  | 2.5 | 105 |
| 1 | 0 | 0 | 0 | 1 | 1 | 95  | 2.5 | 105 |
| 1 | 0 | 0 | 0 | 1 | 1 | 96  | 2.5 | 105 |
| 1 | 0 | 0 | 0 | 1 | 1 | 97  | 2.5 | 105 |
| 1 | 0 | 0 | 0 | 1 | 1 | 98  | 2.5 | 105 |
| 1 | 0 | 0 | 0 | 1 | 1 | 99  | 2.5 | 105 |
| 1 | 0 | 0 | 0 | 1 | 1 | 100 | 2.5 | 105 |

|   |   |   |   |   |   |     |     |     |
|---|---|---|---|---|---|-----|-----|-----|
| 1 | 0 | 0 | 0 | 1 | 1 | 101 | 2.5 | 105 |
| 1 | 0 | 0 | 0 | 1 | 1 | 102 | 2.5 | 105 |
| 1 | 0 | 0 | 0 | 1 | 1 | 103 | 2.5 | 105 |
| 1 | 0 | 0 | 0 | 1 | 1 | 104 | 2.5 | 105 |
| 1 | 0 | 0 | 0 | 1 | 1 | 105 | 2.5 | 105 |
| 1 | 0 | 0 | 0 | 1 | 1 | 106 | 2.5 | 105 |
| 1 | 0 | 0 | 0 | 1 | 1 | 107 | 2.5 | 105 |
| 1 | 0 | 0 | 0 | 1 | 1 | 108 | 2.5 | 105 |
| 1 | 0 | 0 | 0 | 1 | 1 | 109 | 2.5 | 105 |
| 1 | 0 | 0 | 0 | 1 | 1 | 110 | 2.5 | 105 |
| 1 | 0 | 0 | 0 | 1 | 1 | 111 | 2.5 | 105 |
| 1 | 0 | 0 | 0 | 1 | 1 | 112 | 2.5 | 105 |
| 1 | 0 | 0 | 0 | 1 | 1 | 113 | 2.5 | 105 |
| 1 | 0 | 0 | 0 | 1 | 1 | 114 | 2.5 | 105 |
| 1 | 0 | 0 | 0 | 1 | 1 | 115 | 2.5 | 105 |
| 1 | 0 | 0 | 0 | 1 | 1 | 116 | 2.5 | 105 |
| 1 | 0 | 0 | 0 | 1 | 1 | 117 | 2.5 | 105 |
| 1 | 0 | 0 | 0 | 1 | 1 | 118 | 2.5 | 105 |
| 1 | 0 | 0 | 0 | 1 | 1 | 119 | 2.5 | 105 |
| 1 | 1 | 1 | 1 | 0 | 0 | 121 | 2.5 | 135 |
| 1 | 1 | 1 | 1 | 0 | 0 | 122 | 2.5 | 135 |
| 1 | 1 | 1 | 1 | 0 | 0 | 123 | 2.5 | 135 |
| 1 | 1 | 1 | 1 | 0 | 0 | 124 | 2.5 | 135 |
| 1 | 1 | 1 | 1 | 0 | 0 | 125 | 2.5 | 135 |
| 1 | 1 | 1 | 1 | 0 | 0 | 126 | 2.5 | 135 |
| 1 | 1 | 1 | 1 | 0 | 0 | 127 | 2.5 | 135 |
| 1 | 1 | 1 | 1 | 0 | 0 | 128 | 2.5 | 135 |
| 1 | 1 | 1 | 1 | 0 | 0 | 129 | 2.5 | 135 |
| 1 | 1 | 1 | 1 | 0 | 0 | 130 | 2.5 | 135 |
| 1 | 1 | 1 | 1 | 0 | 0 | 131 | 2.5 | 135 |
| 1 | 1 | 1 | 1 | 0 | 0 | 132 | 2.5 | 135 |
| 1 | 1 | 1 | 1 | 0 | 0 | 133 | 2.5 | 135 |
| 1 | 1 | 1 | 1 | 0 | 0 | 134 | 2.5 | 135 |
| 1 | 1 | 1 | 1 | 0 | 0 | 135 | 2.5 | 135 |
| 1 | 1 | 1 | 1 | 0 | 0 | 136 | 2.5 | 135 |
| 1 | 1 | 1 | 1 | 0 | 0 | 137 | 2.5 | 135 |
| 1 | 1 | 1 | 1 | 0 | 0 | 138 | 2.5 | 135 |
| 1 | 1 | 1 | 1 | 0 | 0 | 139 | 2.5 | 135 |
| 1 | 1 | 1 | 1 | 0 | 0 | 140 | 2.5 | 135 |
| 1 | 1 | 1 | 1 | 0 | 0 | 141 | 2.5 | 135 |
| 1 | 1 | 1 | 1 | 0 | 0 | 142 | 2.5 | 135 |
| 1 | 1 | 1 | 1 | 0 | 0 | 143 | 2.5 | 135 |
| 1 | 1 | 1 | 1 | 0 | 0 | 144 | 2.5 | 135 |
| 1 | 1 | 1 | 1 | 0 | 0 | 145 | 2.5 | 135 |
| 1 | 1 | 1 | 1 | 0 | 0 | 146 | 2.5 | 135 |
| 1 | 1 | 1 | 1 | 0 | 0 | 147 | 2.5 | 135 |

|   |   |   |   |   |   |     |     |     |
|---|---|---|---|---|---|-----|-----|-----|
| 1 | 1 | 1 | 1 | 0 | 0 | 148 | 2.5 | 135 |
| 1 | 1 | 1 | 1 | 0 | 0 | 149 | 2.5 | 135 |
| 1 | 1 | 1 | 1 | 0 | 0 | 150 | 2.5 | 150 |
| 1 | 1 | 1 | 1 | 0 | 0 | 151 | 2.5 | 165 |
| 1 | 1 | 1 | 1 | 0 | 0 | 152 | 2.5 | 165 |
| 1 | 1 | 1 | 1 | 0 | 0 | 153 | 2.5 | 165 |
| 1 | 1 | 1 | 1 | 0 | 0 | 154 | 2.5 | 165 |
| 1 | 1 | 1 | 1 | 0 | 0 | 155 | 2.5 | 165 |
| 1 | 1 | 1 | 1 | 0 | 0 | 156 | 2.5 | 165 |
| 1 | 1 | 1 | 1 | 0 | 0 | 157 | 2.5 | 165 |
| 1 | 1 | 1 | 1 | 0 | 0 | 158 | 2.5 | 165 |
| 1 | 1 | 1 | 1 | 0 | 0 | 159 | 2.5 | 165 |
| 1 | 1 | 1 | 1 | 0 | 0 | 160 | 2.5 | 165 |
| 1 | 1 | 1 | 1 | 0 | 0 | 161 | 2.5 | 165 |
| 1 | 1 | 1 | 1 | 0 | 0 | 162 | 2.5 | 165 |
| 1 | 1 | 1 | 1 | 0 | 0 | 163 | 2.5 | 165 |
| 1 | 1 | 1 | 1 | 0 | 0 | 164 | 2.5 | 165 |
| 1 | 1 | 1 | 1 | 0 | 0 | 165 | 2.5 | 165 |
| 1 | 1 | 1 | 1 | 0 | 0 | 166 | 2.5 | 165 |
| 1 | 1 | 1 | 1 | 0 | 0 | 167 | 2.5 | 165 |
| 1 | 1 | 1 | 1 | 0 | 0 | 168 | 2.5 | 165 |
| 1 | 1 | 1 | 1 | 0 | 0 | 169 | 2.5 | 165 |
| 1 | 1 | 1 | 1 | 0 | 0 | 170 | 2.5 | 165 |
| 1 | 1 | 1 | 1 | 0 | 0 | 171 | 2.5 | 165 |
| 1 | 1 | 1 | 1 | 0 | 0 | 172 | 2.5 | 165 |
| 1 | 1 | 1 | 1 | 0 | 0 | 173 | 2.5 | 165 |
| 1 | 1 | 1 | 1 | 0 | 0 | 174 | 2.5 | 165 |
| 1 | 1 | 1 | 1 | 0 | 0 | 175 | 2.5 | 165 |
| 1 | 1 | 1 | 1 | 0 | 0 | 176 | 2.5 | 165 |
| 1 | 1 | 1 | 1 | 0 | 0 | 177 | 2.5 | 165 |
| 1 | 1 | 1 | 1 | 0 | 0 | 178 | 2.5 | 165 |
| 1 | 1 | 1 | 1 | 0 | 0 | 179 | 2.5 | 165 |
| 1 | 1 | 1 | 1 | 0 | 0 | 180 | 2.5 | 180 |
| 1 | 1 | 1 | 0 | 1 | 0 | 91  | 2.5 | 105 |
| 1 | 1 | 1 | 0 | 1 | 0 | 92  | 2.5 | 105 |
| 1 | 1 | 1 | 0 | 1 | 0 | 93  | 2.5 | 105 |
| 1 | 1 | 1 | 0 | 1 | 0 | 94  | 2.5 | 105 |
| 1 | 1 | 1 | 0 | 1 | 0 | 95  | 2.5 | 105 |
| 1 | 1 | 1 | 0 | 1 | 0 | 96  | 2.5 | 105 |
| 1 | 1 | 1 | 0 | 1 | 0 | 97  | 2.5 | 105 |
| 1 | 1 | 1 | 0 | 1 | 0 | 98  | 2.5 | 105 |
| 1 | 1 | 1 | 0 | 1 | 0 | 99  | 2.5 | 105 |
| 1 | 1 | 1 | 0 | 1 | 0 | 100 | 2.5 | 105 |
| 1 | 1 | 1 | 0 | 1 | 0 | 101 | 2.5 | 105 |
| 1 | 1 | 1 | 0 | 1 | 0 | 102 | 2.5 | 105 |
| 1 | 1 | 1 | 0 | 1 | 0 | 103 | 2.5 | 105 |

|   |   |   |   |   |   |     |     |     |
|---|---|---|---|---|---|-----|-----|-----|
| 1 | 1 | 1 | 0 | 1 | 0 | 104 | 2.5 | 105 |
| 1 | 1 | 1 | 0 | 1 | 0 | 105 | 2.5 | 105 |
| 1 | 1 | 1 | 0 | 1 | 0 | 106 | 2.5 | 105 |
| 1 | 1 | 1 | 0 | 1 | 0 | 107 | 2.5 | 105 |
| 1 | 1 | 1 | 0 | 1 | 0 | 108 | 2.5 | 105 |
| 1 | 1 | 1 | 0 | 1 | 0 | 109 | 2.5 | 105 |
| 1 | 1 | 1 | 0 | 1 | 0 | 110 | 2.5 | 105 |
| 1 | 1 | 1 | 0 | 1 | 0 | 111 | 2.5 | 105 |
| 1 | 1 | 1 | 0 | 1 | 0 | 112 | 2.5 | 105 |
| 1 | 1 | 1 | 0 | 1 | 0 | 113 | 2.5 | 105 |
| 1 | 1 | 1 | 0 | 1 | 0 | 114 | 2.5 | 105 |
| 1 | 1 | 1 | 0 | 1 | 0 | 115 | 2.5 | 105 |
| 1 | 1 | 1 | 0 | 1 | 0 | 116 | 2.5 | 105 |
| 1 | 1 | 1 | 0 | 1 | 0 | 117 | 2.5 | 105 |
| 1 | 1 | 1 | 0 | 1 | 0 | 118 | 2.5 | 105 |
| 1 | 1 | 1 | 0 | 1 | 0 | 119 | 2.5 | 105 |
| 1 | 1 | 1 | 0 | 1 | 0 | 151 | 2.5 | 165 |
| 1 | 1 | 1 | 0 | 1 | 0 | 152 | 2.5 | 165 |
| 1 | 1 | 1 | 0 | 1 | 0 | 153 | 2.5 | 165 |
| 1 | 1 | 1 | 0 | 1 | 0 | 154 | 2.5 | 165 |
| 1 | 1 | 1 | 0 | 1 | 0 | 155 | 2.5 | 165 |
| 1 | 1 | 1 | 0 | 1 | 0 | 156 | 2.5 | 165 |
| 1 | 1 | 1 | 0 | 1 | 0 | 157 | 2.5 | 165 |
| 1 | 1 | 1 | 0 | 1 | 0 | 158 | 2.5 | 165 |
| 1 | 1 | 1 | 0 | 1 | 0 | 159 | 2.5 | 165 |
| 1 | 1 | 1 | 0 | 1 | 0 | 160 | 2.5 | 165 |
| 1 | 1 | 1 | 0 | 1 | 0 | 161 | 2.5 | 165 |
| 1 | 1 | 1 | 0 | 1 | 0 | 162 | 2.5 | 165 |
| 1 | 1 | 1 | 0 | 1 | 0 | 163 | 2.5 | 165 |
| 1 | 1 | 1 | 0 | 1 | 0 | 164 | 2.5 | 165 |
| 1 | 1 | 1 | 0 | 1 | 0 | 165 | 2.5 | 165 |
| 1 | 1 | 1 | 0 | 1 | 0 | 166 | 2.5 | 165 |
| 1 | 1 | 1 | 0 | 1 | 0 | 167 | 2.5 | 165 |
| 1 | 1 | 1 | 0 | 1 | 0 | 168 | 2.5 | 165 |
| 1 | 1 | 1 | 0 | 1 | 0 | 169 | 2.5 | 165 |
| 1 | 1 | 1 | 0 | 1 | 0 | 170 | 2.5 | 165 |
| 1 | 1 | 1 | 0 | 1 | 0 | 171 | 2.5 | 165 |
| 1 | 1 | 1 | 0 | 1 | 0 | 172 | 2.5 | 165 |
| 1 | 1 | 1 | 0 | 1 | 0 | 173 | 2.5 | 165 |
| 1 | 1 | 1 | 0 | 1 | 0 | 174 | 2.5 | 165 |
| 1 | 1 | 1 | 0 | 1 | 0 | 175 | 2.5 | 165 |
| 1 | 1 | 1 | 0 | 1 | 0 | 176 | 2.5 | 165 |
| 1 | 1 | 1 | 0 | 1 | 0 | 177 | 2.5 | 165 |
| 1 | 1 | 1 | 0 | 1 | 0 | 178 | 2.5 | 165 |
| 1 | 1 | 1 | 0 | 1 | 0 | 179 | 2.5 | 165 |
| 1 | 1 | 1 | 0 | 1 | 0 | 180 | 2.5 | 180 |

|   |   |   |   |   |   |     |     |     |
|---|---|---|---|---|---|-----|-----|-----|
| 1 | 1 | 1 | 0 | 0 | 1 | 91  | 2.5 | 105 |
| 1 | 1 | 1 | 0 | 0 | 1 | 92  | 2.5 | 105 |
| 1 | 1 | 1 | 0 | 0 | 1 | 93  | 2.5 | 105 |
| 1 | 1 | 1 | 0 | 0 | 1 | 94  | 2.5 | 105 |
| 1 | 1 | 1 | 0 | 0 | 1 | 95  | 2.5 | 105 |
| 1 | 1 | 1 | 0 | 0 | 1 | 96  | 2.5 | 105 |
| 1 | 1 | 1 | 0 | 0 | 1 | 97  | 2.5 | 105 |
| 1 | 1 | 1 | 0 | 0 | 1 | 98  | 2.5 | 105 |
| 1 | 1 | 1 | 0 | 0 | 1 | 99  | 2.5 | 105 |
| 1 | 1 | 1 | 0 | 0 | 1 | 100 | 2.5 | 105 |
| 1 | 1 | 1 | 0 | 0 | 1 | 101 | 2.5 | 105 |
| 1 | 1 | 1 | 0 | 0 | 1 | 102 | 2.5 | 105 |
| 1 | 1 | 1 | 0 | 0 | 1 | 103 | 2.5 | 105 |
| 1 | 1 | 1 | 0 | 0 | 1 | 104 | 2.5 | 105 |
| 1 | 1 | 1 | 0 | 0 | 1 | 105 | 2.5 | 105 |
| 1 | 1 | 1 | 0 | 0 | 1 | 106 | 2.5 | 105 |
| 1 | 1 | 1 | 0 | 0 | 1 | 107 | 2.5 | 105 |
| 1 | 1 | 1 | 0 | 0 | 1 | 108 | 2.5 | 105 |
| 1 | 1 | 1 | 0 | 0 | 1 | 109 | 2.5 | 105 |
| 1 | 1 | 1 | 0 | 0 | 1 | 110 | 2.5 | 105 |
| 1 | 1 | 1 | 0 | 0 | 1 | 111 | 2.5 | 105 |
| 1 | 1 | 1 | 0 | 0 | 1 | 112 | 2.5 | 105 |
| 1 | 1 | 1 | 0 | 0 | 1 | 113 | 2.5 | 105 |
| 1 | 1 | 1 | 0 | 0 | 1 | 114 | 2.5 | 105 |
| 1 | 1 | 1 | 0 | 0 | 1 | 115 | 2.5 | 105 |
| 1 | 1 | 1 | 0 | 0 | 1 | 116 | 2.5 | 105 |
| 1 | 1 | 1 | 0 | 0 | 1 | 117 | 2.5 | 105 |
| 1 | 1 | 1 | 0 | 0 | 1 | 118 | 2.5 | 105 |
| 1 | 1 | 1 | 0 | 0 | 1 | 119 | 2.5 | 105 |
| 1 | 1 | 1 | 0 | 0 | 1 | 120 | 2.5 | 120 |
| 1 | 1 | 1 | 0 | 0 | 1 | 121 | 2.5 | 135 |
| 1 | 1 | 1 | 0 | 0 | 1 | 122 | 2.5 | 135 |
| 1 | 1 | 1 | 0 | 0 | 1 | 123 | 2.5 | 135 |
| 1 | 1 | 1 | 0 | 0 | 1 | 124 | 2.5 | 135 |
| 1 | 1 | 1 | 0 | 0 | 1 | 125 | 2.5 | 135 |
| 1 | 1 | 1 | 0 | 0 | 1 | 126 | 2.5 | 135 |
| 1 | 1 | 1 | 0 | 0 | 1 | 127 | 2.5 | 135 |
| 1 | 1 | 1 | 0 | 0 | 1 | 128 | 2.5 | 135 |
| 1 | 1 | 1 | 0 | 0 | 1 | 129 | 2.5 | 135 |
| 1 | 1 | 1 | 0 | 0 | 1 | 130 | 2.5 | 135 |
| 1 | 1 | 1 | 0 | 0 | 1 | 131 | 2.5 | 135 |
| 1 | 1 | 1 | 0 | 0 | 1 | 132 | 2.5 | 135 |
| 1 | 1 | 1 | 0 | 0 | 1 | 133 | 2.5 | 135 |
| 1 | 1 | 1 | 0 | 0 | 1 | 134 | 2.5 | 135 |
| 1 | 1 | 1 | 0 | 0 | 1 | 135 | 2.5 | 135 |
| 1 | 1 | 1 | 0 | 0 | 1 | 136 | 2.5 | 135 |

|   |   |   |   |   |   |     |     |     |
|---|---|---|---|---|---|-----|-----|-----|
| 1 | 1 | 1 | 0 | 0 | 1 | 137 | 2.5 | 135 |
| 1 | 1 | 1 | 0 | 0 | 1 | 138 | 2.5 | 135 |
| 1 | 1 | 1 | 0 | 0 | 1 | 139 | 2.5 | 135 |
| 1 | 1 | 1 | 0 | 0 | 1 | 140 | 2.5 | 135 |
| 1 | 1 | 1 | 0 | 0 | 1 | 141 | 2.5 | 135 |
| 1 | 1 | 1 | 0 | 0 | 1 | 142 | 2.5 | 135 |
| 1 | 1 | 1 | 0 | 0 | 1 | 143 | 2.5 | 135 |
| 1 | 1 | 1 | 0 | 0 | 1 | 144 | 2.5 | 135 |
| 1 | 1 | 1 | 0 | 0 | 1 | 145 | 2.5 | 135 |
| 1 | 1 | 1 | 0 | 0 | 1 | 146 | 2.5 | 135 |
| 1 | 1 | 1 | 0 | 0 | 1 | 147 | 2.5 | 135 |
| 1 | 1 | 1 | 0 | 0 | 1 | 148 | 2.5 | 135 |
| 1 | 1 | 1 | 0 | 0 | 1 | 149 | 2.5 | 135 |
| 1 | 1 | 0 | 1 | 1 | 0 | 61  | 2.5 | 75  |
| 1 | 1 | 0 | 1 | 1 | 0 | 62  | 2.5 | 75  |
| 1 | 1 | 0 | 1 | 1 | 0 | 63  | 2.5 | 75  |
| 1 | 1 | 0 | 1 | 1 | 0 | 64  | 2.5 | 75  |
| 1 | 1 | 0 | 1 | 1 | 0 | 65  | 2.5 | 75  |
| 1 | 1 | 0 | 1 | 1 | 0 | 66  | 2.5 | 75  |
| 1 | 1 | 0 | 1 | 1 | 0 | 67  | 2.5 | 75  |
| 1 | 1 | 0 | 1 | 1 | 0 | 68  | 2.5 | 75  |
| 1 | 1 | 0 | 1 | 1 | 0 | 69  | 2.5 | 75  |
| 1 | 1 | 0 | 1 | 1 | 0 | 70  | 2.5 | 75  |
| 1 | 1 | 0 | 1 | 1 | 0 | 71  | 2.5 | 75  |
| 1 | 1 | 0 | 1 | 1 | 0 | 72  | 2.5 | 75  |
| 1 | 1 | 0 | 1 | 1 | 0 | 73  | 2.5 | 75  |
| 1 | 1 | 0 | 1 | 1 | 0 | 74  | 2.5 | 75  |
| 1 | 1 | 0 | 1 | 1 | 0 | 75  | 2.5 | 75  |
| 1 | 1 | 0 | 1 | 1 | 0 | 76  | 2.5 | 75  |
| 1 | 1 | 0 | 1 | 1 | 0 | 77  | 2.5 | 75  |
| 1 | 1 | 0 | 1 | 1 | 0 | 78  | 2.5 | 75  |
| 1 | 1 | 0 | 1 | 1 | 0 | 79  | 2.5 | 75  |
| 1 | 1 | 0 | 1 | 1 | 0 | 80  | 2.5 | 75  |
| 1 | 1 | 0 | 1 | 1 | 0 | 81  | 2.5 | 75  |
| 1 | 1 | 0 | 1 | 1 | 0 | 82  | 2.5 | 75  |
| 1 | 1 | 0 | 1 | 1 | 0 | 83  | 2.5 | 75  |
| 1 | 1 | 0 | 1 | 1 | 0 | 84  | 2.5 | 75  |
| 1 | 1 | 0 | 1 | 1 | 0 | 85  | 2.5 | 75  |
| 1 | 1 | 0 | 1 | 1 | 0 | 86  | 2.5 | 75  |
| 1 | 1 | 0 | 1 | 1 | 0 | 87  | 2.5 | 75  |
| 1 | 1 | 0 | 1 | 1 | 0 | 88  | 2.5 | 75  |
| 1 | 1 | 0 | 1 | 1 | 0 | 89  | 2.5 | 75  |
| 1 | 1 | 0 | 1 | 1 | 0 | 151 | 2.5 | 165 |
| 1 | 1 | 0 | 1 | 1 | 0 | 152 | 2.5 | 165 |
| 1 | 1 | 0 | 1 | 1 | 0 | 153 | 2.5 | 165 |
| 1 | 1 | 0 | 1 | 1 | 0 | 154 | 2.5 | 165 |
| 1 | 1 | 0 | 1 | 1 | 0 | 155 | 2.5 | 165 |

|   |   |   |   |   |   |     |     |     |
|---|---|---|---|---|---|-----|-----|-----|
| 1 | 1 | 0 | 1 | 1 | 0 | 156 | 2.5 | 165 |
| 1 | 1 | 0 | 1 | 1 | 0 | 157 | 2.5 | 165 |
| 1 | 1 | 0 | 1 | 1 | 0 | 158 | 2.5 | 165 |
| 1 | 1 | 0 | 1 | 1 | 0 | 159 | 2.5 | 165 |
| 1 | 1 | 0 | 1 | 1 | 0 | 160 | 2.5 | 165 |
| 1 | 1 | 0 | 1 | 1 | 0 | 161 | 2.5 | 165 |
| 1 | 1 | 0 | 1 | 1 | 0 | 162 | 2.5 | 165 |
| 1 | 1 | 0 | 1 | 1 | 0 | 163 | 2.5 | 165 |
| 1 | 1 | 0 | 1 | 1 | 0 | 164 | 2.5 | 165 |
| 1 | 1 | 0 | 1 | 1 | 0 | 165 | 2.5 | 165 |
| 1 | 1 | 0 | 1 | 1 | 0 | 166 | 2.5 | 165 |
| 1 | 1 | 0 | 1 | 1 | 0 | 167 | 2.5 | 165 |
| 1 | 1 | 0 | 1 | 1 | 0 | 168 | 2.5 | 165 |
| 1 | 1 | 0 | 1 | 1 | 0 | 169 | 2.5 | 165 |
| 1 | 1 | 0 | 1 | 1 | 0 | 170 | 2.5 | 165 |
| 1 | 1 | 0 | 1 | 1 | 0 | 171 | 2.5 | 165 |
| 1 | 1 | 0 | 1 | 1 | 0 | 172 | 2.5 | 165 |
| 1 | 1 | 0 | 1 | 1 | 0 | 173 | 2.5 | 165 |
| 1 | 1 | 0 | 1 | 1 | 0 | 174 | 2.5 | 165 |
| 1 | 1 | 0 | 1 | 1 | 0 | 175 | 2.5 | 165 |
| 1 | 1 | 0 | 1 | 1 | 0 | 176 | 2.5 | 165 |
| 1 | 1 | 0 | 1 | 1 | 0 | 177 | 2.5 | 165 |
| 1 | 1 | 0 | 1 | 1 | 0 | 178 | 2.5 | 165 |
| 1 | 1 | 0 | 1 | 1 | 0 | 179 | 2.5 | 165 |
| 1 | 1 | 0 | 1 | 1 | 0 | 180 | 2.5 | 180 |
| 1 | 1 | 0 | 1 | 0 | 1 | 61  | 2.5 | 75  |
| 1 | 1 | 0 | 1 | 0 | 1 | 62  | 2.5 | 75  |
| 1 | 1 | 0 | 1 | 0 | 1 | 63  | 2.5 | 75  |
| 1 | 1 | 0 | 1 | 0 | 1 | 64  | 2.5 | 75  |
| 1 | 1 | 0 | 1 | 0 | 1 | 65  | 2.5 | 75  |
| 1 | 1 | 0 | 1 | 0 | 1 | 66  | 2.5 | 75  |
| 1 | 1 | 0 | 1 | 0 | 1 | 67  | 2.5 | 75  |
| 1 | 1 | 0 | 1 | 0 | 1 | 68  | 2.5 | 75  |
| 1 | 1 | 0 | 1 | 0 | 1 | 69  | 2.5 | 75  |
| 1 | 1 | 0 | 1 | 0 | 1 | 70  | 2.5 | 75  |
| 1 | 1 | 0 | 1 | 0 | 1 | 71  | 2.5 | 75  |
| 1 | 1 | 0 | 1 | 0 | 1 | 72  | 2.5 | 75  |
| 1 | 1 | 0 | 1 | 0 | 1 | 73  | 2.5 | 75  |
| 1 | 1 | 0 | 1 | 0 | 1 | 74  | 2.5 | 75  |
| 1 | 1 | 0 | 1 | 0 | 1 | 75  | 2.5 | 75  |
| 1 | 1 | 0 | 1 | 0 | 1 | 76  | 2.5 | 75  |
| 1 | 1 | 0 | 1 | 0 | 1 | 77  | 2.5 | 75  |
| 1 | 1 | 0 | 1 | 0 | 1 | 78  | 2.5 | 75  |
| 1 | 1 | 0 | 1 | 0 | 1 | 79  | 2.5 | 75  |
| 1 | 1 | 0 | 1 | 0 | 1 | 80  | 2.5 | 75  |
| 1 | 1 | 0 | 1 | 0 | 1 | 81  | 2.5 | 75  |

|   |   |   |   |   |   |     |     |     |
|---|---|---|---|---|---|-----|-----|-----|
| 1 | 1 | 0 | 1 | 0 | 1 | 82  | 2.5 | 75  |
| 1 | 1 | 0 | 1 | 0 | 1 | 83  | 2.5 | 75  |
| 1 | 1 | 0 | 1 | 0 | 1 | 84  | 2.5 | 75  |
| 1 | 1 | 0 | 1 | 0 | 1 | 85  | 2.5 | 75  |
| 1 | 1 | 0 | 1 | 0 | 1 | 86  | 2.5 | 75  |
| 1 | 1 | 0 | 1 | 0 | 1 | 87  | 2.5 | 75  |
| 1 | 1 | 0 | 1 | 0 | 1 | 88  | 2.5 | 75  |
| 1 | 1 | 0 | 1 | 0 | 1 | 89  | 2.5 | 75  |
| 1 | 1 | 0 | 1 | 0 | 1 | 121 | 2.5 | 135 |
| 1 | 1 | 0 | 1 | 0 | 1 | 122 | 2.5 | 135 |
| 1 | 1 | 0 | 1 | 0 | 1 | 123 | 2.5 | 135 |
| 1 | 1 | 0 | 1 | 0 | 1 | 124 | 2.5 | 135 |
| 1 | 1 | 0 | 1 | 0 | 1 | 125 | 2.5 | 135 |
| 1 | 1 | 0 | 1 | 0 | 1 | 126 | 2.5 | 135 |
| 1 | 1 | 0 | 1 | 0 | 1 | 127 | 2.5 | 135 |
| 1 | 1 | 0 | 1 | 0 | 1 | 128 | 2.5 | 135 |
| 1 | 1 | 0 | 1 | 0 | 1 | 129 | 2.5 | 135 |
| 1 | 1 | 0 | 1 | 0 | 1 | 130 | 2.5 | 135 |
| 1 | 1 | 0 | 1 | 0 | 1 | 131 | 2.5 | 135 |
| 1 | 1 | 0 | 1 | 0 | 1 | 132 | 2.5 | 135 |
| 1 | 1 | 0 | 1 | 0 | 1 | 133 | 2.5 | 135 |
| 1 | 1 | 0 | 1 | 0 | 1 | 134 | 2.5 | 135 |
| 1 | 1 | 0 | 1 | 0 | 1 | 135 | 2.5 | 135 |
| 1 | 1 | 0 | 1 | 0 | 1 | 136 | 2.5 | 135 |
| 1 | 1 | 0 | 1 | 0 | 1 | 137 | 2.5 | 135 |
| 1 | 1 | 0 | 1 | 0 | 1 | 138 | 2.5 | 135 |
| 1 | 1 | 0 | 1 | 0 | 1 | 139 | 2.5 | 135 |
| 1 | 1 | 0 | 1 | 0 | 1 | 140 | 2.5 | 135 |
| 1 | 1 | 0 | 1 | 0 | 1 | 141 | 2.5 | 135 |
| 1 | 1 | 0 | 1 | 0 | 1 | 142 | 2.5 | 135 |
| 1 | 1 | 0 | 1 | 0 | 1 | 143 | 2.5 | 135 |
| 1 | 1 | 0 | 1 | 0 | 1 | 144 | 2.5 | 135 |
| 1 | 1 | 0 | 1 | 0 | 1 | 145 | 2.5 | 135 |
| 1 | 1 | 0 | 1 | 0 | 1 | 146 | 2.5 | 135 |
| 1 | 1 | 0 | 1 | 0 | 1 | 147 | 2.5 | 135 |
| 1 | 1 | 0 | 1 | 0 | 1 | 148 | 2.5 | 135 |
| 1 | 1 | 0 | 1 | 0 | 1 | 149 | 2.5 | 135 |
| 1 | 1 | 0 | 0 | 1 | 1 | 61  | 2.5 | 75  |
| 1 | 1 | 0 | 0 | 1 | 1 | 62  | 2.5 | 75  |
| 1 | 1 | 0 | 0 | 1 | 1 | 63  | 2.5 | 75  |
| 1 | 1 | 0 | 0 | 1 | 1 | 64  | 2.5 | 75  |
| 1 | 1 | 0 | 0 | 1 | 1 | 65  | 2.5 | 75  |
| 1 | 1 | 0 | 0 | 1 | 1 | 66  | 2.5 | 75  |
| 1 | 1 | 0 | 0 | 1 | 1 | 67  | 2.5 | 75  |
| 1 | 1 | 0 | 0 | 1 | 1 | 68  | 2.5 | 75  |
| 1 | 1 | 0 | 0 | 1 | 1 | 69  | 2.5 | 75  |
| 1 | 1 | 0 | 0 | 1 | 1 | 70  | 2.5 | 75  |

|   |   |   |   |   |   |     |     |     |
|---|---|---|---|---|---|-----|-----|-----|
| 1 | 1 | 0 | 0 | 1 | 1 | 71  | 2.5 | 75  |
| 1 | 1 | 0 | 0 | 1 | 1 | 72  | 2.5 | 75  |
| 1 | 1 | 0 | 0 | 1 | 1 | 73  | 2.5 | 75  |
| 1 | 1 | 0 | 0 | 1 | 1 | 74  | 2.5 | 75  |
| 1 | 1 | 0 | 0 | 1 | 1 | 75  | 2.5 | 75  |
| 1 | 1 | 0 | 0 | 1 | 1 | 76  | 2.5 | 75  |
| 1 | 1 | 0 | 0 | 1 | 1 | 77  | 2.5 | 75  |
| 1 | 1 | 0 | 0 | 1 | 1 | 78  | 2.5 | 75  |
| 1 | 1 | 0 | 0 | 1 | 1 | 79  | 2.5 | 75  |
| 1 | 1 | 0 | 0 | 1 | 1 | 80  | 2.5 | 75  |
| 1 | 1 | 0 | 0 | 1 | 1 | 81  | 2.5 | 75  |
| 1 | 1 | 0 | 0 | 1 | 1 | 82  | 2.5 | 75  |
| 1 | 1 | 0 | 0 | 1 | 1 | 83  | 2.5 | 75  |
| 1 | 1 | 0 | 0 | 1 | 1 | 84  | 2.5 | 75  |
| 1 | 1 | 0 | 0 | 1 | 1 | 85  | 2.5 | 75  |
| 1 | 1 | 0 | 0 | 1 | 1 | 86  | 2.5 | 75  |
| 1 | 1 | 0 | 0 | 1 | 1 | 87  | 2.5 | 75  |
| 1 | 1 | 0 | 0 | 1 | 1 | 88  | 2.5 | 75  |
| 1 | 1 | 0 | 0 | 1 | 1 | 89  | 2.5 | 75  |
| 1 | 1 | 0 | 0 | 1 | 1 | 90  | 2.5 | 90  |
| 1 | 1 | 0 | 0 | 1 | 1 | 91  | 2.5 | 105 |
| 1 | 1 | 0 | 0 | 1 | 1 | 92  | 2.5 | 105 |
| 1 | 1 | 0 | 0 | 1 | 1 | 93  | 2.5 | 105 |
| 1 | 1 | 0 | 0 | 1 | 1 | 94  | 2.5 | 105 |
| 1 | 1 | 0 | 0 | 1 | 1 | 95  | 2.5 | 105 |
| 1 | 1 | 0 | 0 | 1 | 1 | 96  | 2.5 | 105 |
| 1 | 1 | 0 | 0 | 1 | 1 | 97  | 2.5 | 105 |
| 1 | 1 | 0 | 0 | 1 | 1 | 98  | 2.5 | 105 |
| 1 | 1 | 0 | 0 | 1 | 1 | 99  | 2.5 | 105 |
| 1 | 1 | 0 | 0 | 1 | 1 | 100 | 2.5 | 105 |
| 1 | 1 | 0 | 0 | 1 | 1 | 101 | 2.5 | 105 |
| 1 | 1 | 0 | 0 | 1 | 1 | 102 | 2.5 | 105 |
| 1 | 1 | 0 | 0 | 1 | 1 | 103 | 2.5 | 105 |
| 1 | 1 | 0 | 0 | 1 | 1 | 104 | 2.5 | 105 |
| 1 | 1 | 0 | 0 | 1 | 1 | 105 | 2.5 | 105 |
| 1 | 1 | 0 | 0 | 1 | 1 | 106 | 2.5 | 105 |
| 1 | 1 | 0 | 0 | 1 | 1 | 107 | 2.5 | 105 |
| 1 | 1 | 0 | 0 | 1 | 1 | 108 | 2.5 | 105 |
| 1 | 1 | 0 | 0 | 1 | 1 | 109 | 2.5 | 105 |
| 1 | 1 | 0 | 0 | 1 | 1 | 110 | 2.5 | 105 |
| 1 | 1 | 0 | 0 | 1 | 1 | 111 | 2.5 | 105 |
| 1 | 1 | 0 | 0 | 1 | 1 | 112 | 2.5 | 105 |
| 1 | 1 | 0 | 0 | 1 | 1 | 113 | 2.5 | 105 |
| 1 | 1 | 0 | 0 | 1 | 1 | 114 | 2.5 | 105 |
| 1 | 1 | 0 | 0 | 1 | 1 | 115 | 2.5 | 105 |
| 1 | 1 | 0 | 0 | 1 | 1 | 116 | 2.5 | 105 |

|   |   |   |   |   |   |     |     |     |
|---|---|---|---|---|---|-----|-----|-----|
| 1 | 1 | 0 | 0 | 1 | 1 | 117 | 2.5 | 105 |
| 1 | 1 | 0 | 0 | 1 | 1 | 118 | 2.5 | 105 |
| 1 | 1 | 0 | 0 | 1 | 1 | 119 | 2.5 | 105 |
| 1 | 0 | 1 | 1 | 1 | 0 | 31  | 2.5 | 45  |
| 1 | 0 | 1 | 1 | 1 | 0 | 32  | 2.5 | 45  |
| 1 | 0 | 1 | 1 | 1 | 0 | 33  | 2.5 | 45  |
| 1 | 0 | 1 | 1 | 1 | 0 | 34  | 2.5 | 45  |
| 1 | 0 | 1 | 1 | 1 | 0 | 35  | 2.5 | 45  |
| 1 | 0 | 1 | 1 | 1 | 0 | 36  | 2.5 | 45  |
| 1 | 0 | 1 | 1 | 1 | 0 | 37  | 2.5 | 45  |
| 1 | 0 | 1 | 1 | 1 | 0 | 38  | 2.5 | 45  |
| 1 | 0 | 1 | 1 | 1 | 0 | 39  | 2.5 | 45  |
| 1 | 0 | 1 | 1 | 1 | 0 | 40  | 2.5 | 45  |
| 1 | 0 | 1 | 1 | 1 | 0 | 41  | 2.5 | 45  |
| 1 | 0 | 1 | 1 | 1 | 0 | 42  | 2.5 | 45  |
| 1 | 0 | 1 | 1 | 1 | 0 | 43  | 2.5 | 45  |
| 1 | 0 | 1 | 1 | 1 | 0 | 44  | 2.5 | 45  |
| 1 | 0 | 1 | 1 | 1 | 0 | 45  | 2.5 | 45  |
| 1 | 0 | 1 | 1 | 1 | 0 | 46  | 2.5 | 45  |
| 1 | 0 | 1 | 1 | 1 | 0 | 47  | 2.5 | 45  |
| 1 | 0 | 1 | 1 | 1 | 0 | 48  | 2.5 | 45  |
| 1 | 0 | 1 | 1 | 1 | 0 | 49  | 2.5 | 45  |
| 1 | 0 | 1 | 1 | 1 | 0 | 50  | 2.5 | 45  |
| 1 | 0 | 1 | 1 | 1 | 0 | 51  | 2.5 | 45  |
| 1 | 0 | 1 | 1 | 1 | 0 | 52  | 2.5 | 45  |
| 1 | 0 | 1 | 1 | 1 | 0 | 53  | 2.5 | 45  |
| 1 | 0 | 1 | 1 | 1 | 0 | 54  | 2.5 | 45  |
| 1 | 0 | 1 | 1 | 1 | 0 | 55  | 2.5 | 45  |
| 1 | 0 | 1 | 1 | 1 | 0 | 56  | 2.5 | 45  |
| 1 | 0 | 1 | 1 | 1 | 0 | 57  | 2.5 | 45  |
| 1 | 0 | 1 | 1 | 1 | 0 | 58  | 2.5 | 45  |
| 1 | 0 | 1 | 1 | 1 | 0 | 59  | 2.5 | 45  |
| 1 | 0 | 1 | 1 | 1 | 0 | 151 | 2.5 | 165 |
| 1 | 0 | 1 | 1 | 1 | 0 | 152 | 2.5 | 165 |
| 1 | 0 | 1 | 1 | 1 | 0 | 153 | 2.5 | 165 |
| 1 | 0 | 1 | 1 | 1 | 0 | 154 | 2.5 | 165 |
| 1 | 0 | 1 | 1 | 1 | 0 | 155 | 2.5 | 165 |
| 1 | 0 | 1 | 1 | 1 | 0 | 156 | 2.5 | 165 |
| 1 | 0 | 1 | 1 | 1 | 0 | 157 | 2.5 | 165 |
| 1 | 0 | 1 | 1 | 1 | 0 | 158 | 2.5 | 165 |
| 1 | 0 | 1 | 1 | 1 | 0 | 159 | 2.5 | 165 |
| 1 | 0 | 1 | 1 | 1 | 0 | 160 | 2.5 | 165 |
| 1 | 0 | 1 | 1 | 1 | 0 | 161 | 2.5 | 165 |
| 1 | 0 | 1 | 1 | 1 | 0 | 162 | 2.5 | 165 |
| 1 | 0 | 1 | 1 | 1 | 0 | 163 | 2.5 | 165 |
| 1 | 0 | 1 | 1 | 1 | 0 | 164 | 2.5 | 165 |
| 1 | 0 | 1 | 1 | 1 | 0 | 165 | 2.5 | 165 |

|   |   |   |   |   |   |     |     |     |
|---|---|---|---|---|---|-----|-----|-----|
| 1 | 0 | 1 | 1 | 1 | 0 | 166 | 2.5 | 165 |
| 1 | 0 | 1 | 1 | 1 | 0 | 167 | 2.5 | 165 |
| 1 | 0 | 1 | 1 | 1 | 0 | 168 | 2.5 | 165 |
| 1 | 0 | 1 | 1 | 1 | 0 | 169 | 2.5 | 165 |
| 1 | 0 | 1 | 1 | 1 | 0 | 170 | 2.5 | 165 |
| 1 | 0 | 1 | 1 | 1 | 0 | 171 | 2.5 | 165 |
| 1 | 0 | 1 | 1 | 1 | 0 | 172 | 2.5 | 165 |
| 1 | 0 | 1 | 1 | 1 | 0 | 173 | 2.5 | 165 |
| 1 | 0 | 1 | 1 | 1 | 0 | 174 | 2.5 | 165 |
| 1 | 0 | 1 | 1 | 1 | 0 | 175 | 2.5 | 165 |
| 1 | 0 | 1 | 1 | 1 | 0 | 176 | 2.5 | 165 |
| 1 | 0 | 1 | 1 | 1 | 0 | 177 | 2.5 | 165 |
| 1 | 0 | 1 | 1 | 1 | 0 | 178 | 2.5 | 165 |
| 1 | 0 | 1 | 1 | 1 | 0 | 179 | 2.5 | 165 |
| 1 | 0 | 1 | 1 | 1 | 0 | 180 | 2.5 | 180 |
| 1 | 0 | 1 | 1 | 0 | 1 | 31  | 2.5 | 45  |
| 1 | 0 | 1 | 1 | 0 | 1 | 32  | 2.5 | 45  |
| 1 | 0 | 1 | 1 | 0 | 1 | 33  | 2.5 | 45  |
| 1 | 0 | 1 | 1 | 0 | 1 | 34  | 2.5 | 45  |
| 1 | 0 | 1 | 1 | 0 | 1 | 35  | 2.5 | 45  |
| 1 | 0 | 1 | 1 | 0 | 1 | 36  | 2.5 | 45  |
| 1 | 0 | 1 | 1 | 0 | 1 | 37  | 2.5 | 45  |
| 1 | 0 | 1 | 1 | 0 | 1 | 38  | 2.5 | 45  |
| 1 | 0 | 1 | 1 | 0 | 1 | 39  | 2.5 | 45  |
| 1 | 0 | 1 | 1 | 0 | 1 | 40  | 2.5 | 45  |
| 1 | 0 | 1 | 1 | 0 | 1 | 41  | 2.5 | 45  |
| 1 | 0 | 1 | 1 | 0 | 1 | 42  | 2.5 | 45  |
| 1 | 0 | 1 | 1 | 0 | 1 | 43  | 2.5 | 45  |
| 1 | 0 | 1 | 1 | 0 | 1 | 44  | 2.5 | 45  |
| 1 | 0 | 1 | 1 | 0 | 1 | 45  | 2.5 | 45  |
| 1 | 0 | 1 | 1 | 0 | 1 | 46  | 2.5 | 45  |
| 1 | 0 | 1 | 1 | 0 | 1 | 47  | 2.5 | 45  |
| 1 | 0 | 1 | 1 | 0 | 1 | 48  | 2.5 | 45  |
| 1 | 0 | 1 | 1 | 0 | 1 | 49  | 2.5 | 45  |
| 1 | 0 | 1 | 1 | 0 | 1 | 50  | 2.5 | 45  |
| 1 | 0 | 1 | 1 | 0 | 1 | 51  | 2.5 | 45  |
| 1 | 0 | 1 | 1 | 0 | 1 | 52  | 2.5 | 45  |
| 1 | 0 | 1 | 1 | 0 | 1 | 53  | 2.5 | 45  |
| 1 | 0 | 1 | 1 | 0 | 1 | 54  | 2.5 | 45  |
| 1 | 0 | 1 | 1 | 0 | 1 | 55  | 2.5 | 45  |
| 1 | 0 | 1 | 1 | 0 | 1 | 56  | 2.5 | 45  |
| 1 | 0 | 1 | 1 | 0 | 1 | 57  | 2.5 | 45  |
| 1 | 0 | 1 | 1 | 0 | 1 | 58  | 2.5 | 45  |
| 1 | 0 | 1 | 1 | 0 | 1 | 59  | 2.5 | 45  |
| 1 | 0 | 1 | 1 | 0 | 1 | 121 | 2.5 | 135 |
| 1 | 0 | 1 | 1 | 0 | 1 | 122 | 2.5 | 135 |

|   |   |   |   |   |   |     |     |     |
|---|---|---|---|---|---|-----|-----|-----|
| 1 | 0 | 1 | 1 | 0 | 1 | 123 | 2.5 | 135 |
| 1 | 0 | 1 | 1 | 0 | 1 | 124 | 2.5 | 135 |
| 1 | 0 | 1 | 1 | 0 | 1 | 125 | 2.5 | 135 |
| 1 | 0 | 1 | 1 | 0 | 1 | 126 | 2.5 | 135 |
| 1 | 0 | 1 | 1 | 0 | 1 | 127 | 2.5 | 135 |
| 1 | 0 | 1 | 1 | 0 | 1 | 128 | 2.5 | 135 |
| 1 | 0 | 1 | 1 | 0 | 1 | 129 | 2.5 | 135 |
| 1 | 0 | 1 | 1 | 0 | 1 | 130 | 2.5 | 135 |
| 1 | 0 | 1 | 1 | 0 | 1 | 131 | 2.5 | 135 |
| 1 | 0 | 1 | 1 | 0 | 1 | 132 | 2.5 | 135 |
| 1 | 0 | 1 | 1 | 0 | 1 | 133 | 2.5 | 135 |
| 1 | 0 | 1 | 1 | 0 | 1 | 134 | 2.5 | 135 |
| 1 | 0 | 1 | 1 | 0 | 1 | 135 | 2.5 | 135 |
| 1 | 0 | 1 | 1 | 0 | 1 | 136 | 2.5 | 135 |
| 1 | 0 | 1 | 1 | 0 | 1 | 137 | 2.5 | 135 |
| 1 | 0 | 1 | 1 | 0 | 1 | 138 | 2.5 | 135 |
| 1 | 0 | 1 | 1 | 0 | 1 | 139 | 2.5 | 135 |
| 1 | 0 | 1 | 1 | 0 | 1 | 140 | 2.5 | 135 |
| 1 | 0 | 1 | 1 | 0 | 1 | 141 | 2.5 | 135 |
| 1 | 0 | 1 | 1 | 0 | 1 | 142 | 2.5 | 135 |
| 1 | 0 | 1 | 1 | 0 | 1 | 143 | 2.5 | 135 |
| 1 | 0 | 1 | 1 | 0 | 1 | 144 | 2.5 | 135 |
| 1 | 0 | 1 | 1 | 0 | 1 | 145 | 2.5 | 135 |
| 1 | 0 | 1 | 1 | 0 | 1 | 146 | 2.5 | 135 |
| 1 | 0 | 1 | 1 | 0 | 1 | 147 | 2.5 | 135 |
| 1 | 0 | 1 | 1 | 0 | 1 | 148 | 2.5 | 135 |
| 1 | 0 | 1 | 1 | 0 | 1 | 149 | 2.5 | 135 |
| 1 | 0 | 1 | 0 | 1 | 1 | 31  | 2.5 | 45  |
| 1 | 0 | 1 | 0 | 1 | 1 | 32  | 2.5 | 45  |
| 1 | 0 | 1 | 0 | 1 | 1 | 33  | 2.5 | 45  |
| 1 | 0 | 1 | 0 | 1 | 1 | 34  | 2.5 | 45  |
| 1 | 0 | 1 | 0 | 1 | 1 | 35  | 2.5 | 45  |
| 1 | 0 | 1 | 0 | 1 | 1 | 36  | 2.5 | 45  |
| 1 | 0 | 1 | 0 | 1 | 1 | 37  | 2.5 | 45  |
| 1 | 0 | 1 | 0 | 1 | 1 | 38  | 2.5 | 45  |
| 1 | 0 | 1 | 0 | 1 | 1 | 39  | 2.5 | 45  |
| 1 | 0 | 1 | 0 | 1 | 1 | 40  | 2.5 | 45  |
| 1 | 0 | 1 | 0 | 1 | 1 | 41  | 2.5 | 45  |
| 1 | 0 | 1 | 0 | 1 | 1 | 42  | 2.5 | 45  |
| 1 | 0 | 1 | 0 | 1 | 1 | 43  | 2.5 | 45  |
| 1 | 0 | 1 | 0 | 1 | 1 | 44  | 2.5 | 45  |
| 1 | 0 | 1 | 0 | 1 | 1 | 45  | 2.5 | 45  |
| 1 | 0 | 1 | 0 | 1 | 1 | 46  | 2.5 | 45  |
| 1 | 0 | 1 | 0 | 1 | 1 | 47  | 2.5 | 45  |
| 1 | 0 | 1 | 0 | 1 | 1 | 48  | 2.5 | 45  |
| 1 | 0 | 1 | 0 | 1 | 1 | 49  | 2.5 | 45  |
| 1 | 0 | 1 | 0 | 1 | 1 | 50  | 2.5 | 45  |

|   |   |   |   |   |   |     |     |     |
|---|---|---|---|---|---|-----|-----|-----|
| 1 | 0 | 1 | 0 | 1 | 1 | 51  | 2.5 | 45  |
| 1 | 0 | 1 | 0 | 1 | 1 | 52  | 2.5 | 45  |
| 1 | 0 | 1 | 0 | 1 | 1 | 53  | 2.5 | 45  |
| 1 | 0 | 1 | 0 | 1 | 1 | 54  | 2.5 | 45  |
| 1 | 0 | 1 | 0 | 1 | 1 | 55  | 2.5 | 45  |
| 1 | 0 | 1 | 0 | 1 | 1 | 56  | 2.5 | 45  |
| 1 | 0 | 1 | 0 | 1 | 1 | 57  | 2.5 | 45  |
| 1 | 0 | 1 | 0 | 1 | 1 | 58  | 2.5 | 45  |
| 1 | 0 | 1 | 0 | 1 | 1 | 59  | 2.5 | 45  |
| 1 | 0 | 1 | 0 | 1 | 1 | 91  | 2.5 | 105 |
| 1 | 0 | 1 | 0 | 1 | 1 | 92  | 2.5 | 105 |
| 1 | 0 | 1 | 0 | 1 | 1 | 93  | 2.5 | 105 |
| 1 | 0 | 1 | 0 | 1 | 1 | 94  | 2.5 | 105 |
| 1 | 0 | 1 | 0 | 1 | 1 | 95  | 2.5 | 105 |
| 1 | 0 | 1 | 0 | 1 | 1 | 96  | 2.5 | 105 |
| 1 | 0 | 1 | 0 | 1 | 1 | 97  | 2.5 | 105 |
| 1 | 0 | 1 | 0 | 1 | 1 | 98  | 2.5 | 105 |
| 1 | 0 | 1 | 0 | 1 | 1 | 99  | 2.5 | 105 |
| 1 | 0 | 1 | 0 | 1 | 1 | 100 | 2.5 | 105 |
| 1 | 0 | 1 | 0 | 1 | 1 | 101 | 2.5 | 105 |
| 1 | 0 | 1 | 0 | 1 | 1 | 102 | 2.5 | 105 |
| 1 | 0 | 1 | 0 | 1 | 1 | 103 | 2.5 | 105 |
| 1 | 0 | 1 | 0 | 1 | 1 | 104 | 2.5 | 105 |
| 1 | 0 | 1 | 0 | 1 | 1 | 105 | 2.5 | 105 |
| 1 | 0 | 1 | 0 | 1 | 1 | 106 | 2.5 | 105 |
| 1 | 0 | 1 | 0 | 1 | 1 | 107 | 2.5 | 105 |
| 1 | 0 | 1 | 0 | 1 | 1 | 108 | 2.5 | 105 |
| 1 | 0 | 1 | 0 | 1 | 1 | 109 | 2.5 | 105 |
| 1 | 0 | 1 | 0 | 1 | 1 | 110 | 2.5 | 105 |
| 1 | 0 | 1 | 0 | 1 | 1 | 111 | 2.5 | 105 |
| 1 | 0 | 1 | 0 | 1 | 1 | 112 | 2.5 | 105 |
| 1 | 0 | 1 | 0 | 1 | 1 | 113 | 2.5 | 105 |
| 1 | 0 | 1 | 0 | 1 | 1 | 114 | 2.5 | 105 |
| 1 | 0 | 1 | 0 | 1 | 1 | 115 | 2.5 | 105 |
| 1 | 0 | 1 | 0 | 1 | 1 | 116 | 2.5 | 105 |
| 1 | 0 | 1 | 0 | 1 | 1 | 117 | 2.5 | 105 |
| 1 | 0 | 1 | 0 | 1 | 1 | 118 | 2.5 | 105 |
| 1 | 0 | 1 | 0 | 1 | 1 | 119 | 2.5 | 105 |
| 1 | 0 | 0 | 1 | 1 | 1 | 31  | 2.5 | 45  |
| 1 | 0 | 0 | 1 | 1 | 1 | 32  | 2.5 | 45  |
| 1 | 0 | 0 | 1 | 1 | 1 | 33  | 2.5 | 45  |
| 1 | 0 | 0 | 1 | 1 | 1 | 34  | 2.5 | 45  |
| 1 | 0 | 0 | 1 | 1 | 1 | 35  | 2.5 | 45  |
| 1 | 0 | 0 | 1 | 1 | 1 | 36  | 2.5 | 45  |
| 1 | 0 | 0 | 1 | 1 | 1 | 37  | 2.5 | 45  |
| 1 | 0 | 0 | 1 | 1 | 1 | 38  | 2.5 | 45  |
| 1 | 0 | 0 | 1 | 1 | 1 | 39  | 2.5 | 45  |

|   |   |   |   |   |   |    |     |    |
|---|---|---|---|---|---|----|-----|----|
| 1 | 0 | 0 | 1 | 1 | 1 | 40 | 2.5 | 45 |
| 1 | 0 | 0 | 1 | 1 | 1 | 41 | 2.5 | 45 |
| 1 | 0 | 0 | 1 | 1 | 1 | 42 | 2.5 | 45 |
| 1 | 0 | 0 | 1 | 1 | 1 | 43 | 2.5 | 45 |
| 1 | 0 | 0 | 1 | 1 | 1 | 44 | 2.5 | 45 |
| 1 | 0 | 0 | 1 | 1 | 1 | 45 | 2.5 | 45 |
| 1 | 0 | 0 | 1 | 1 | 1 | 46 | 2.5 | 45 |
| 1 | 0 | 0 | 1 | 1 | 1 | 47 | 2.5 | 45 |
| 1 | 0 | 0 | 1 | 1 | 1 | 48 | 2.5 | 45 |
| 1 | 0 | 0 | 1 | 1 | 1 | 49 | 2.5 | 45 |
| 1 | 0 | 0 | 1 | 1 | 1 | 50 | 2.5 | 45 |
| 1 | 0 | 0 | 1 | 1 | 1 | 51 | 2.5 | 45 |
| 1 | 0 | 0 | 1 | 1 | 1 | 52 | 2.5 | 45 |
| 1 | 0 | 0 | 1 | 1 | 1 | 53 | 2.5 | 45 |
| 1 | 0 | 0 | 1 | 1 | 1 | 54 | 2.5 | 45 |
| 1 | 0 | 0 | 1 | 1 | 1 | 55 | 2.5 | 45 |
| 1 | 0 | 0 | 1 | 1 | 1 | 56 | 2.5 | 45 |
| 1 | 0 | 0 | 1 | 1 | 1 | 57 | 2.5 | 45 |
| 1 | 0 | 0 | 1 | 1 | 1 | 58 | 2.5 | 45 |
| 1 | 0 | 0 | 1 | 1 | 1 | 59 | 2.5 | 45 |
| 1 | 0 | 0 | 1 | 1 | 1 | 60 | 2.5 | 60 |
| 1 | 0 | 0 | 1 | 1 | 1 | 61 | 2.5 | 75 |
| 1 | 0 | 0 | 1 | 1 | 1 | 62 | 2.5 | 75 |
| 1 | 0 | 0 | 1 | 1 | 1 | 63 | 2.5 | 75 |
| 1 | 0 | 0 | 1 | 1 | 1 | 64 | 2.5 | 75 |
| 1 | 0 | 0 | 1 | 1 | 1 | 65 | 2.5 | 75 |
| 1 | 0 | 0 | 1 | 1 | 1 | 66 | 2.5 | 75 |
| 1 | 0 | 0 | 1 | 1 | 1 | 67 | 2.5 | 75 |
| 1 | 0 | 0 | 1 | 1 | 1 | 68 | 2.5 | 75 |
| 1 | 0 | 0 | 1 | 1 | 1 | 69 | 2.5 | 75 |
| 1 | 0 | 0 | 1 | 1 | 1 | 70 | 2.5 | 75 |
| 1 | 0 | 0 | 1 | 1 | 1 | 71 | 2.5 | 75 |
| 1 | 0 | 0 | 1 | 1 | 1 | 72 | 2.5 | 75 |
| 1 | 0 | 0 | 1 | 1 | 1 | 73 | 2.5 | 75 |
| 1 | 0 | 0 | 1 | 1 | 1 | 74 | 2.5 | 75 |
| 1 | 0 | 0 | 1 | 1 | 1 | 75 | 2.5 | 75 |
| 1 | 0 | 0 | 1 | 1 | 1 | 76 | 2.5 | 75 |
| 1 | 0 | 0 | 1 | 1 | 1 | 77 | 2.5 | 75 |
| 1 | 0 | 0 | 1 | 1 | 1 | 78 | 2.5 | 75 |
| 1 | 0 | 0 | 1 | 1 | 1 | 79 | 2.5 | 75 |
| 1 | 0 | 0 | 1 | 1 | 1 | 80 | 2.5 | 75 |
| 1 | 0 | 0 | 1 | 1 | 1 | 81 | 2.5 | 75 |
| 1 | 0 | 0 | 1 | 1 | 1 | 82 | 2.5 | 75 |
| 1 | 0 | 0 | 1 | 1 | 1 | 83 | 2.5 | 75 |
| 1 | 0 | 0 | 1 | 1 | 1 | 84 | 2.5 | 75 |
| 1 | 0 | 0 | 1 | 1 | 1 | 85 | 2.5 | 75 |

|   |   |   |   |   |   |     |     |     |
|---|---|---|---|---|---|-----|-----|-----|
| 1 | 0 | 0 | 1 | 1 | 1 | 86  | 2.5 | 75  |
| 1 | 0 | 0 | 1 | 1 | 1 | 87  | 2.5 | 75  |
| 1 | 0 | 0 | 1 | 1 | 1 | 88  | 2.5 | 75  |
| 1 | 0 | 0 | 1 | 1 | 1 | 89  | 2.5 | 75  |
| 1 | 1 | 1 | 1 | 1 | 0 | 151 | 2.5 | 165 |
| 1 | 1 | 1 | 1 | 1 | 0 | 152 | 2.5 | 165 |
| 1 | 1 | 1 | 1 | 1 | 0 | 153 | 2.5 | 165 |
| 1 | 1 | 1 | 1 | 1 | 0 | 154 | 2.5 | 165 |
| 1 | 1 | 1 | 1 | 1 | 0 | 155 | 2.5 | 165 |
| 1 | 1 | 1 | 1 | 1 | 0 | 156 | 2.5 | 165 |
| 1 | 1 | 1 | 1 | 1 | 0 | 157 | 2.5 | 165 |
| 1 | 1 | 1 | 1 | 1 | 0 | 158 | 2.5 | 165 |
| 1 | 1 | 1 | 1 | 1 | 0 | 159 | 2.5 | 165 |
| 1 | 1 | 1 | 1 | 1 | 0 | 160 | 2.5 | 165 |
| 1 | 1 | 1 | 1 | 1 | 0 | 161 | 2.5 | 165 |
| 1 | 1 | 1 | 1 | 1 | 0 | 162 | 2.5 | 165 |
| 1 | 1 | 1 | 1 | 1 | 0 | 163 | 2.5 | 165 |
| 1 | 1 | 1 | 1 | 1 | 0 | 164 | 2.5 | 165 |
| 1 | 1 | 1 | 1 | 1 | 0 | 165 | 2.5 | 165 |
| 1 | 1 | 1 | 1 | 1 | 0 | 166 | 2.5 | 165 |
| 1 | 1 | 1 | 1 | 1 | 0 | 167 | 2.5 | 165 |
| 1 | 1 | 1 | 1 | 1 | 0 | 168 | 2.5 | 165 |
| 1 | 1 | 1 | 1 | 1 | 0 | 169 | 2.5 | 165 |
| 1 | 1 | 1 | 1 | 1 | 0 | 170 | 2.5 | 165 |
| 1 | 1 | 1 | 1 | 1 | 0 | 171 | 2.5 | 165 |
| 1 | 1 | 1 | 1 | 1 | 0 | 172 | 2.5 | 165 |
| 1 | 1 | 1 | 1 | 1 | 0 | 173 | 2.5 | 165 |
| 1 | 1 | 1 | 1 | 1 | 0 | 174 | 2.5 | 165 |
| 1 | 1 | 1 | 1 | 1 | 0 | 175 | 2.5 | 165 |
| 1 | 1 | 1 | 1 | 1 | 0 | 176 | 2.5 | 165 |
| 1 | 1 | 1 | 1 | 1 | 0 | 177 | 2.5 | 165 |
| 1 | 1 | 1 | 1 | 1 | 0 | 178 | 2.5 | 165 |
| 1 | 1 | 1 | 1 | 1 | 0 | 179 | 2.5 | 165 |
| 1 | 1 | 1 | 1 | 1 | 0 | 180 | 2.5 | 165 |
| 1 | 1 | 1 | 1 | 0 | 1 | 121 | 2.5 | 135 |
| 1 | 1 | 1 | 1 | 0 | 1 | 122 | 2.5 | 135 |
| 1 | 1 | 1 | 1 | 0 | 1 | 123 | 2.5 | 135 |
| 1 | 1 | 1 | 1 | 0 | 1 | 124 | 2.5 | 135 |
| 1 | 1 | 1 | 1 | 0 | 1 | 125 | 2.5 | 135 |
| 1 | 1 | 1 | 1 | 0 | 1 | 126 | 2.5 | 135 |
| 1 | 1 | 1 | 1 | 0 | 1 | 127 | 2.5 | 135 |
| 1 | 1 | 1 | 1 | 0 | 1 | 128 | 2.5 | 135 |
| 1 | 1 | 1 | 1 | 0 | 1 | 129 | 2.5 | 135 |
| 1 | 1 | 1 | 1 | 0 | 1 | 130 | 2.5 | 135 |
| 1 | 1 | 1 | 1 | 0 | 1 | 131 | 2.5 | 135 |
| 1 | 1 | 1 | 1 | 0 | 1 | 132 | 2.5 | 135 |

|   |   |   |   |   |   |     |     |     |
|---|---|---|---|---|---|-----|-----|-----|
| 1 | 1 | 1 | 1 | 0 | 1 | 133 | 2.5 | 135 |
| 1 | 1 | 1 | 1 | 0 | 1 | 134 | 2.5 | 135 |
| 1 | 1 | 1 | 1 | 0 | 1 | 135 | 2.5 | 135 |
| 1 | 1 | 1 | 1 | 0 | 1 | 136 | 2.5 | 135 |
| 1 | 1 | 1 | 1 | 0 | 1 | 137 | 2.5 | 135 |
| 1 | 1 | 1 | 1 | 0 | 1 | 138 | 2.5 | 135 |
| 1 | 1 | 1 | 1 | 0 | 1 | 139 | 2.5 | 135 |
| 1 | 1 | 1 | 1 | 0 | 1 | 140 | 2.5 | 135 |
| 1 | 1 | 1 | 1 | 0 | 1 | 141 | 2.5 | 135 |
| 1 | 1 | 1 | 1 | 0 | 1 | 142 | 2.5 | 135 |
| 1 | 1 | 1 | 1 | 0 | 1 | 143 | 2.5 | 135 |
| 1 | 1 | 1 | 1 | 0 | 1 | 144 | 2.5 | 135 |
| 1 | 1 | 1 | 1 | 0 | 1 | 145 | 2.5 | 135 |
| 1 | 1 | 1 | 1 | 0 | 1 | 146 | 2.5 | 135 |
| 1 | 1 | 1 | 1 | 0 | 1 | 147 | 2.5 | 135 |
| 1 | 1 | 1 | 1 | 0 | 1 | 148 | 2.5 | 135 |
| 1 | 1 | 1 | 1 | 0 | 1 | 149 | 2.5 | 135 |
| 1 | 1 | 1 | 0 | 1 | 1 | 91  | 2.5 | 105 |
| 1 | 1 | 1 | 0 | 1 | 1 | 92  | 2.5 | 105 |
| 1 | 1 | 1 | 0 | 1 | 1 | 93  | 2.5 | 105 |
| 1 | 1 | 1 | 0 | 1 | 1 | 94  | 2.5 | 105 |
| 1 | 1 | 1 | 0 | 1 | 1 | 95  | 2.5 | 105 |
| 1 | 1 | 1 | 0 | 1 | 1 | 96  | 2.5 | 105 |
| 1 | 1 | 1 | 0 | 1 | 1 | 97  | 2.5 | 105 |
| 1 | 1 | 1 | 0 | 1 | 1 | 98  | 2.5 | 105 |
| 1 | 1 | 1 | 0 | 1 | 1 | 99  | 2.5 | 105 |
| 1 | 1 | 1 | 0 | 1 | 1 | 100 | 2.5 | 105 |
| 1 | 1 | 1 | 0 | 1 | 1 | 101 | 2.5 | 105 |
| 1 | 1 | 1 | 0 | 1 | 1 | 102 | 2.5 | 105 |
| 1 | 1 | 1 | 0 | 1 | 1 | 103 | 2.5 | 105 |
| 1 | 1 | 1 | 0 | 1 | 1 | 104 | 2.5 | 105 |
| 1 | 1 | 1 | 0 | 1 | 1 | 105 | 2.5 | 105 |
| 1 | 1 | 1 | 0 | 1 | 1 | 106 | 2.5 | 105 |
| 1 | 1 | 1 | 0 | 1 | 1 | 107 | 2.5 | 105 |
| 1 | 1 | 1 | 0 | 1 | 1 | 108 | 2.5 | 105 |
| 1 | 1 | 1 | 0 | 1 | 1 | 109 | 2.5 | 105 |
| 1 | 1 | 1 | 0 | 1 | 1 | 110 | 2.5 | 105 |
| 1 | 1 | 1 | 0 | 1 | 1 | 111 | 2.5 | 105 |
| 1 | 1 | 1 | 0 | 1 | 1 | 112 | 2.5 | 105 |
| 1 | 1 | 1 | 0 | 1 | 1 | 113 | 2.5 | 105 |
| 1 | 1 | 1 | 0 | 1 | 1 | 114 | 2.5 | 105 |
| 1 | 1 | 1 | 0 | 1 | 1 | 115 | 2.5 | 105 |
| 1 | 1 | 1 | 0 | 1 | 1 | 116 | 2.5 | 105 |
| 1 | 1 | 1 | 0 | 1 | 1 | 117 | 2.5 | 105 |
| 1 | 1 | 1 | 0 | 1 | 1 | 118 | 2.5 | 105 |
| 1 | 1 | 1 | 0 | 1 | 1 | 119 | 2.5 | 105 |
| 1 | 1 | 0 | 1 | 1 | 1 | 61  | 2.5 | 75  |

|   |   |   |   |   |   |    |     |    |
|---|---|---|---|---|---|----|-----|----|
| 1 | 1 | 0 | 1 | 1 | 1 | 62 | 2.5 | 75 |
| 1 | 1 | 0 | 1 | 1 | 1 | 63 | 2.5 | 75 |
| 1 | 1 | 0 | 1 | 1 | 1 | 64 | 2.5 | 75 |
| 1 | 1 | 0 | 1 | 1 | 1 | 65 | 2.5 | 75 |
| 1 | 1 | 0 | 1 | 1 | 1 | 66 | 2.5 | 75 |
| 1 | 1 | 0 | 1 | 1 | 1 | 67 | 2.5 | 75 |
| 1 | 1 | 0 | 1 | 1 | 1 | 68 | 2.5 | 75 |
| 1 | 1 | 0 | 1 | 1 | 1 | 69 | 2.5 | 75 |
| 1 | 1 | 0 | 1 | 1 | 1 | 70 | 2.5 | 75 |
| 1 | 1 | 0 | 1 | 1 | 1 | 71 | 2.5 | 75 |
| 1 | 1 | 0 | 1 | 1 | 1 | 72 | 2.5 | 75 |
| 1 | 1 | 0 | 1 | 1 | 1 | 73 | 2.5 | 75 |
| 1 | 1 | 0 | 1 | 1 | 1 | 74 | 2.5 | 75 |
| 1 | 1 | 0 | 1 | 1 | 1 | 75 | 2.5 | 75 |
| 1 | 1 | 0 | 1 | 1 | 1 | 76 | 2.5 | 75 |
| 1 | 1 | 0 | 1 | 1 | 1 | 77 | 2.5 | 75 |
| 1 | 1 | 0 | 1 | 1 | 1 | 78 | 2.5 | 75 |
| 1 | 1 | 0 | 1 | 1 | 1 | 79 | 2.5 | 75 |
| 1 | 1 | 0 | 1 | 1 | 1 | 80 | 2.5 | 75 |
| 1 | 1 | 0 | 1 | 1 | 1 | 81 | 2.5 | 75 |
| 1 | 1 | 0 | 1 | 1 | 1 | 82 | 2.5 | 75 |
| 1 | 1 | 0 | 1 | 1 | 1 | 83 | 2.5 | 75 |
| 1 | 1 | 0 | 1 | 1 | 1 | 84 | 2.5 | 75 |
| 1 | 1 | 0 | 1 | 1 | 1 | 85 | 2.5 | 75 |
| 1 | 1 | 0 | 1 | 1 | 1 | 86 | 2.5 | 75 |
| 1 | 1 | 0 | 1 | 1 | 1 | 87 | 2.5 | 75 |
| 1 | 1 | 0 | 1 | 1 | 1 | 88 | 2.5 | 75 |
| 1 | 1 | 0 | 1 | 1 | 1 | 89 | 2.5 | 75 |
| 1 | 0 | 1 | 1 | 1 | 1 | 31 | 2.5 | 45 |
| 1 | 0 | 1 | 1 | 1 | 1 | 32 | 2.5 | 45 |
| 1 | 0 | 1 | 1 | 1 | 1 | 33 | 2.5 | 45 |
| 1 | 0 | 1 | 1 | 1 | 1 | 34 | 2.5 | 45 |
| 1 | 0 | 1 | 1 | 1 | 1 | 35 | 2.5 | 45 |
| 1 | 0 | 1 | 1 | 1 | 1 | 36 | 2.5 | 45 |
| 1 | 0 | 1 | 1 | 1 | 1 | 37 | 2.5 | 45 |
| 1 | 0 | 1 | 1 | 1 | 1 | 38 | 2.5 | 45 |
| 1 | 0 | 1 | 1 | 1 | 1 | 39 | 2.5 | 45 |
| 1 | 0 | 1 | 1 | 1 | 1 | 40 | 2.5 | 45 |
| 1 | 0 | 1 | 1 | 1 | 1 | 41 | 2.5 | 45 |
| 1 | 0 | 1 | 1 | 1 | 1 | 42 | 2.5 | 45 |
| 1 | 0 | 1 | 1 | 1 | 1 | 43 | 2.5 | 45 |
| 1 | 0 | 1 | 1 | 1 | 1 | 44 | 2.5 | 45 |
| 1 | 0 | 1 | 1 | 1 | 1 | 45 | 2.5 | 45 |
| 1 | 0 | 1 | 1 | 1 | 1 | 46 | 2.5 | 45 |
| 1 | 0 | 1 | 1 | 1 | 1 | 47 | 2.5 | 45 |
| 1 | 0 | 1 | 1 | 1 | 1 | 48 | 2.5 | 45 |
| 1 | 0 | 1 | 1 | 1 | 1 | 49 | 2.5 | 45 |

|   |   |   |   |   |   |    |     |    |
|---|---|---|---|---|---|----|-----|----|
| 1 | 0 | 1 | 1 | 1 | 1 | 50 | 2.5 | 45 |
| 1 | 0 | 1 | 1 | 1 | 1 | 51 | 2.5 | 45 |
| 1 | 0 | 1 | 1 | 1 | 1 | 52 | 2.5 | 45 |
| 1 | 0 | 1 | 1 | 1 | 1 | 53 | 2.5 | 45 |
| 1 | 0 | 1 | 1 | 1 | 1 | 54 | 2.5 | 45 |
| 1 | 0 | 1 | 1 | 1 | 1 | 55 | 2.5 | 45 |
| 1 | 0 | 1 | 1 | 1 | 1 | 56 | 2.5 | 45 |
| 1 | 0 | 1 | 1 | 1 | 1 | 57 | 2.5 | 45 |
| 1 | 0 | 1 | 1 | 1 | 1 | 58 | 2.5 | 45 |
| 1 | 0 | 1 | 1 | 1 | 1 | 59 | 2.5 | 45 |
| 0 | 1 | 1 | 0 | 0 | 0 | 0  | 2.5 | 0  |
| 0 | 1 | 1 | 0 | 0 | 0 | 1  | 2.5 | 15 |
| 0 | 1 | 1 | 0 | 0 | 0 | 2  | 2.5 | 15 |
| 0 | 1 | 1 | 0 | 0 | 0 | 3  | 2.5 | 15 |
| 0 | 1 | 1 | 0 | 0 | 0 | 4  | 2.5 | 15 |
| 0 | 1 | 1 | 0 | 0 | 0 | 5  | 2.5 | 15 |
| 0 | 1 | 1 | 0 | 0 | 0 | 6  | 2.5 | 15 |
| 0 | 1 | 1 | 0 | 0 | 0 | 7  | 2.5 | 15 |
| 0 | 1 | 1 | 0 | 0 | 0 | 8  | 2.5 | 15 |
| 0 | 1 | 1 | 0 | 0 | 0 | 9  | 2.5 | 15 |
| 0 | 1 | 1 | 0 | 0 | 0 | 10 | 2.5 | 15 |
| 0 | 1 | 1 | 0 | 0 | 0 | 11 | 2.5 | 15 |
| 0 | 1 | 1 | 0 | 0 | 0 | 12 | 2.5 | 15 |
| 0 | 1 | 1 | 0 | 0 | 0 | 13 | 2.5 | 15 |
| 0 | 1 | 1 | 0 | 0 | 0 | 14 | 2.5 | 15 |
| 0 | 1 | 1 | 0 | 0 | 0 | 15 | 2.5 | 15 |
| 0 | 1 | 1 | 0 | 0 | 0 | 16 | 2.5 | 15 |
| 0 | 1 | 1 | 0 | 0 | 0 | 17 | 2.5 | 15 |
| 0 | 1 | 1 | 0 | 0 | 0 | 18 | 2.5 | 15 |
| 0 | 1 | 1 | 0 | 0 | 0 | 19 | 2.5 | 15 |
| 0 | 1 | 1 | 0 | 0 | 0 | 20 | 2.5 | 15 |
| 0 | 1 | 1 | 0 | 0 | 0 | 21 | 2.5 | 15 |
| 0 | 1 | 1 | 0 | 0 | 0 | 22 | 2.5 | 15 |
| 0 | 1 | 1 | 0 | 0 | 0 | 23 | 2.5 | 15 |
| 0 | 1 | 1 | 0 | 0 | 0 | 24 | 2.5 | 15 |
| 0 | 1 | 1 | 0 | 0 | 0 | 25 | 2.5 | 15 |
| 0 | 1 | 1 | 0 | 0 | 0 | 26 | 2.5 | 15 |
| 0 | 1 | 1 | 0 | 0 | 0 | 27 | 2.5 | 15 |
| 0 | 1 | 1 | 0 | 0 | 0 | 28 | 2.5 | 15 |
| 0 | 1 | 1 | 0 | 0 | 0 | 29 | 2.5 | 15 |
| 0 | 1 | 1 | 0 | 0 | 0 | 30 | 2.5 | 15 |
| 0 | 1 | 1 | 0 | 0 | 0 | 31 | 2.5 | 15 |
| 0 | 1 | 1 | 0 | 0 | 0 | 32 | 2.5 | 15 |
| 0 | 1 | 1 | 0 | 0 | 0 | 33 | 2.5 | 15 |
| 0 | 1 | 1 | 0 | 0 | 0 | 34 | 2.5 | 15 |
| 0 | 1 | 1 | 0 | 0 | 0 | 35 | 2.5 | 15 |

|   |   |   |   |   |   |     |     |     |
|---|---|---|---|---|---|-----|-----|-----|
| 0 | 1 | 1 | 0 | 0 | 0 | 36  | 2.5 | 15  |
| 0 | 1 | 1 | 0 | 0 | 0 | 37  | 2.5 | 15  |
| 0 | 1 | 1 | 0 | 0 | 0 | 38  | 2.5 | 15  |
| 0 | 1 | 1 | 0 | 0 | 0 | 39  | 2.5 | 15  |
| 0 | 1 | 1 | 0 | 0 | 0 | 40  | 2.5 | 15  |
| 0 | 1 | 1 | 0 | 0 | 0 | 41  | 2.5 | 15  |
| 0 | 1 | 1 | 0 | 0 | 0 | 42  | 2.5 | 15  |
| 0 | 1 | 1 | 0 | 0 | 0 | 43  | 2.5 | 15  |
| 0 | 1 | 1 | 0 | 0 | 0 | 44  | 2.5 | 15  |
| 0 | 1 | 1 | 0 | 0 | 0 | 45  | 2.5 | 15  |
| 0 | 1 | 1 | 0 | 0 | 0 | 46  | 2.5 | 15  |
| 0 | 1 | 1 | 0 | 0 | 0 | 47  | 2.5 | 15  |
| 0 | 1 | 1 | 0 | 0 | 0 | 48  | 2.5 | 15  |
| 0 | 1 | 1 | 0 | 0 | 0 | 49  | 2.5 | 15  |
| 0 | 1 | 1 | 0 | 0 | 0 | 50  | 2.5 | 15  |
| 0 | 1 | 1 | 0 | 0 | 0 | 51  | 2.5 | 15  |
| 0 | 1 | 1 | 0 | 0 | 0 | 52  | 2.5 | 15  |
| 0 | 1 | 1 | 0 | 0 | 0 | 53  | 2.5 | 15  |
| 0 | 1 | 1 | 0 | 0 | 0 | 54  | 2.5 | 15  |
| 0 | 1 | 1 | 0 | 0 | 0 | 55  | 2.5 | 15  |
| 0 | 1 | 1 | 0 | 0 | 0 | 56  | 2.5 | 15  |
| 0 | 1 | 1 | 0 | 0 | 0 | 57  | 2.5 | 15  |
| 0 | 1 | 1 | 0 | 0 | 0 | 58  | 2.5 | 15  |
| 0 | 1 | 1 | 0 | 0 | 0 | 59  | 2.5 | 15  |
| 0 | 1 | 1 | 0 | 0 | 0 | 91  | 2.5 | 105 |
| 0 | 1 | 1 | 0 | 0 | 0 | 92  | 2.5 | 105 |
| 0 | 1 | 1 | 0 | 0 | 0 | 93  | 2.5 | 105 |
| 0 | 1 | 1 | 0 | 0 | 0 | 94  | 2.5 | 105 |
| 0 | 1 | 1 | 0 | 0 | 0 | 95  | 2.5 | 105 |
| 0 | 1 | 1 | 0 | 0 | 0 | 96  | 2.5 | 105 |
| 0 | 1 | 1 | 0 | 0 | 0 | 97  | 2.5 | 105 |
| 0 | 1 | 1 | 0 | 0 | 0 | 98  | 2.5 | 105 |
| 0 | 1 | 1 | 0 | 0 | 0 | 99  | 2.5 | 105 |
| 0 | 1 | 1 | 0 | 0 | 0 | 100 | 2.5 | 105 |
| 0 | 1 | 1 | 0 | 0 | 0 | 101 | 2.5 | 105 |
| 0 | 1 | 1 | 0 | 0 | 0 | 102 | 2.5 | 105 |
| 0 | 1 | 1 | 0 | 0 | 0 | 103 | 2.5 | 105 |
| 0 | 1 | 1 | 0 | 0 | 0 | 104 | 2.5 | 105 |
| 0 | 1 | 1 | 0 | 0 | 0 | 105 | 2.5 | 105 |
| 0 | 1 | 1 | 0 | 0 | 0 | 106 | 2.5 | 105 |
| 0 | 1 | 1 | 0 | 0 | 0 | 107 | 2.5 | 105 |
| 0 | 1 | 1 | 0 | 0 | 0 | 108 | 2.5 | 105 |
| 0 | 1 | 1 | 0 | 0 | 0 | 109 | 2.5 | 105 |
| 0 | 1 | 1 | 0 | 0 | 0 | 110 | 2.5 | 105 |
| 0 | 1 | 1 | 0 | 0 | 0 | 111 | 2.5 | 105 |
| 0 | 1 | 1 | 0 | 0 | 0 | 112 | 2.5 | 105 |
| 0 | 1 | 1 | 0 | 0 | 0 | 113 | 2.5 | 105 |

|   |   |   |   |   |   |     |     |     |
|---|---|---|---|---|---|-----|-----|-----|
| 0 | 1 | 1 | 0 | 0 | 0 | 114 | 2.5 | 105 |
| 0 | 1 | 1 | 0 | 0 | 0 | 115 | 2.5 | 105 |
| 0 | 1 | 1 | 0 | 0 | 0 | 116 | 2.5 | 105 |
| 0 | 1 | 1 | 0 | 0 | 0 | 117 | 2.5 | 105 |
| 0 | 1 | 1 | 0 | 0 | 0 | 118 | 2.5 | 105 |
| 0 | 1 | 1 | 0 | 0 | 0 | 119 | 2.5 | 105 |
| 0 | 1 | 1 | 0 | 0 | 0 | 120 | 2.5 | 120 |
| 0 | 1 | 1 | 0 | 0 | 0 | 121 | 2.5 | 135 |
| 0 | 1 | 1 | 0 | 0 | 0 | 122 | 2.5 | 135 |
| 0 | 1 | 1 | 0 | 0 | 0 | 123 | 2.5 | 135 |
| 0 | 1 | 1 | 0 | 0 | 0 | 124 | 2.5 | 135 |
| 0 | 1 | 1 | 0 | 0 | 0 | 125 | 2.5 | 135 |
| 0 | 1 | 1 | 0 | 0 | 0 | 126 | 2.5 | 135 |
| 0 | 1 | 1 | 0 | 0 | 0 | 127 | 2.5 | 135 |
| 0 | 1 | 1 | 0 | 0 | 0 | 128 | 2.5 | 135 |
| 0 | 1 | 1 | 0 | 0 | 0 | 129 | 2.5 | 135 |
| 0 | 1 | 1 | 0 | 0 | 0 | 130 | 2.5 | 135 |
| 0 | 1 | 1 | 0 | 0 | 0 | 131 | 2.5 | 135 |
| 0 | 1 | 1 | 0 | 0 | 0 | 132 | 2.5 | 135 |
| 0 | 1 | 1 | 0 | 0 | 0 | 133 | 2.5 | 135 |
| 0 | 1 | 1 | 0 | 0 | 0 | 134 | 2.5 | 135 |
| 0 | 1 | 1 | 0 | 0 | 0 | 135 | 2.5 | 135 |
| 0 | 1 | 1 | 0 | 0 | 0 | 136 | 2.5 | 135 |
| 0 | 1 | 1 | 0 | 0 | 0 | 137 | 2.5 | 135 |
| 0 | 1 | 1 | 0 | 0 | 0 | 138 | 2.5 | 135 |
| 0 | 1 | 1 | 0 | 0 | 0 | 139 | 2.5 | 135 |
| 0 | 1 | 1 | 0 | 0 | 0 | 140 | 2.5 | 135 |
| 0 | 1 | 1 | 0 | 0 | 0 | 141 | 2.5 | 135 |
| 0 | 1 | 1 | 0 | 0 | 0 | 142 | 2.5 | 135 |
| 0 | 1 | 1 | 0 | 0 | 0 | 143 | 2.5 | 135 |
| 0 | 1 | 1 | 0 | 0 | 0 | 144 | 2.5 | 135 |
| 0 | 1 | 1 | 0 | 0 | 0 | 145 | 2.5 | 135 |
| 0 | 1 | 1 | 0 | 0 | 0 | 146 | 2.5 | 135 |
| 0 | 1 | 1 | 0 | 0 | 0 | 147 | 2.5 | 135 |
| 0 | 1 | 1 | 0 | 0 | 0 | 148 | 2.5 | 135 |
| 0 | 1 | 1 | 0 | 0 | 0 | 149 | 2.5 | 135 |
| 0 | 1 | 1 | 0 | 0 | 0 | 150 | 2.5 | 150 |
| 0 | 1 | 1 | 0 | 0 | 0 | 151 | 2.5 | 165 |
| 0 | 1 | 1 | 0 | 0 | 0 | 152 | 2.5 | 165 |
| 0 | 1 | 1 | 0 | 0 | 0 | 153 | 2.5 | 165 |
| 0 | 1 | 1 | 0 | 0 | 0 | 154 | 2.5 | 165 |
| 0 | 1 | 1 | 0 | 0 | 0 | 155 | 2.5 | 165 |
| 0 | 1 | 1 | 0 | 0 | 0 | 156 | 2.5 | 165 |
| 0 | 1 | 1 | 0 | 0 | 0 | 157 | 2.5 | 165 |
| 0 | 1 | 1 | 0 | 0 | 0 | 158 | 2.5 | 165 |
| 0 | 1 | 1 | 0 | 0 | 0 | 159 | 2.5 | 165 |

|   |   |   |   |   |   |     |     |     |
|---|---|---|---|---|---|-----|-----|-----|
| 0 | 1 | 1 | 0 | 0 | 0 | 160 | 2.5 | 165 |
| 0 | 1 | 1 | 0 | 0 | 0 | 161 | 2.5 | 165 |
| 0 | 1 | 1 | 0 | 0 | 0 | 162 | 2.5 | 165 |
| 0 | 1 | 1 | 0 | 0 | 0 | 163 | 2.5 | 165 |
| 0 | 1 | 1 | 0 | 0 | 0 | 164 | 2.5 | 165 |
| 0 | 1 | 1 | 0 | 0 | 0 | 165 | 2.5 | 165 |
| 0 | 1 | 1 | 0 | 0 | 0 | 166 | 2.5 | 165 |
| 0 | 1 | 1 | 0 | 0 | 0 | 167 | 2.5 | 165 |
| 0 | 1 | 1 | 0 | 0 | 0 | 168 | 2.5 | 165 |
| 0 | 1 | 1 | 0 | 0 | 0 | 169 | 2.5 | 165 |
| 0 | 1 | 1 | 0 | 0 | 0 | 170 | 2.5 | 165 |
| 0 | 1 | 1 | 0 | 0 | 0 | 171 | 2.5 | 165 |
| 0 | 1 | 1 | 0 | 0 | 0 | 172 | 2.5 | 165 |
| 0 | 1 | 1 | 0 | 0 | 0 | 173 | 2.5 | 165 |
| 0 | 1 | 1 | 0 | 0 | 0 | 174 | 2.5 | 165 |
| 0 | 1 | 1 | 0 | 0 | 0 | 175 | 2.5 | 165 |
| 0 | 1 | 1 | 0 | 0 | 0 | 176 | 2.5 | 165 |
| 0 | 1 | 1 | 0 | 0 | 0 | 177 | 2.5 | 165 |
| 0 | 1 | 1 | 0 | 0 | 0 | 178 | 2.5 | 165 |
| 0 | 1 | 1 | 0 | 0 | 0 | 179 | 2.5 | 165 |
| 0 | 1 | 1 | 0 | 0 | 0 | 180 | 2.5 | 180 |
| 0 | 1 | 0 | 1 | 0 | 0 | 0   | 2.5 | 0   |
| 0 | 1 | 0 | 1 | 0 | 0 | 1   | 2.5 | 15  |
| 0 | 1 | 0 | 1 | 0 | 0 | 2   | 2.5 | 15  |
| 0 | 1 | 0 | 1 | 0 | 0 | 3   | 2.5 | 15  |
| 0 | 1 | 0 | 1 | 0 | 0 | 4   | 2.5 | 15  |
| 0 | 1 | 0 | 1 | 0 | 0 | 5   | 2.5 | 15  |
| 0 | 1 | 0 | 1 | 0 | 0 | 6   | 2.5 | 15  |
| 0 | 1 | 0 | 1 | 0 | 0 | 7   | 2.5 | 15  |
| 0 | 1 | 0 | 1 | 0 | 0 | 8   | 2.5 | 15  |
| 0 | 1 | 0 | 1 | 0 | 0 | 9   | 2.5 | 15  |
| 0 | 1 | 0 | 1 | 0 | 0 | 10  | 2.5 | 15  |
| 0 | 1 | 0 | 1 | 0 | 0 | 11  | 2.5 | 15  |
| 0 | 1 | 0 | 1 | 0 | 0 | 12  | 2.5 | 15  |
| 0 | 1 | 0 | 1 | 0 | 0 | 13  | 2.5 | 15  |
| 0 | 1 | 0 | 1 | 0 | 0 | 14  | 2.5 | 15  |
| 0 | 1 | 0 | 1 | 0 | 0 | 15  | 2.5 | 15  |
| 0 | 1 | 0 | 1 | 0 | 0 | 16  | 2.5 | 15  |
| 0 | 1 | 0 | 1 | 0 | 0 | 17  | 2.5 | 15  |
| 0 | 1 | 0 | 1 | 0 | 0 | 18  | 2.5 | 15  |
| 0 | 1 | 0 | 1 | 0 | 0 | 19  | 2.5 | 15  |
| 0 | 1 | 0 | 1 | 0 | 0 | 20  | 2.5 | 15  |
| 0 | 1 | 0 | 1 | 0 | 0 | 21  | 2.5 | 15  |
| 0 | 1 | 0 | 1 | 0 | 0 | 22  | 2.5 | 15  |
| 0 | 1 | 0 | 1 | 0 | 0 | 23  | 2.5 | 15  |
| 0 | 1 | 0 | 1 | 0 | 0 | 24  | 2.5 | 15  |

|   |   |   |   |   |   |     |     |     |
|---|---|---|---|---|---|-----|-----|-----|
| 0 | 1 | 0 | 1 | 0 | 0 | 25  | 2.5 | 15  |
| 0 | 1 | 0 | 1 | 0 | 0 | 26  | 2.5 | 15  |
| 0 | 1 | 0 | 1 | 0 | 0 | 27  | 2.5 | 15  |
| 0 | 1 | 0 | 1 | 0 | 0 | 28  | 2.5 | 15  |
| 0 | 1 | 0 | 1 | 0 | 0 | 29  | 2.5 | 15  |
| 0 | 1 | 0 | 1 | 0 | 0 | 61  | 2.5 | 75  |
| 0 | 1 | 0 | 1 | 0 | 0 | 62  | 2.5 | 75  |
| 0 | 1 | 0 | 1 | 0 | 0 | 63  | 2.5 | 75  |
| 0 | 1 | 0 | 1 | 0 | 0 | 64  | 2.5 | 75  |
| 0 | 1 | 0 | 1 | 0 | 0 | 65  | 2.5 | 75  |
| 0 | 1 | 0 | 1 | 0 | 0 | 66  | 2.5 | 75  |
| 0 | 1 | 0 | 1 | 0 | 0 | 67  | 2.5 | 75  |
| 0 | 1 | 0 | 1 | 0 | 0 | 68  | 2.5 | 75  |
| 0 | 1 | 0 | 1 | 0 | 0 | 69  | 2.5 | 75  |
| 0 | 1 | 0 | 1 | 0 | 0 | 70  | 2.5 | 75  |
| 0 | 1 | 0 | 1 | 0 | 0 | 71  | 2.5 | 75  |
| 0 | 1 | 0 | 1 | 0 | 0 | 72  | 2.5 | 75  |
| 0 | 1 | 0 | 1 | 0 | 0 | 73  | 2.5 | 75  |
| 0 | 1 | 0 | 1 | 0 | 0 | 74  | 2.5 | 75  |
| 0 | 1 | 0 | 1 | 0 | 0 | 75  | 2.5 | 75  |
| 0 | 1 | 0 | 1 | 0 | 0 | 76  | 2.5 | 75  |
| 0 | 1 | 0 | 1 | 0 | 0 | 77  | 2.5 | 75  |
| 0 | 1 | 0 | 1 | 0 | 0 | 78  | 2.5 | 75  |
| 0 | 1 | 0 | 1 | 0 | 0 | 79  | 2.5 | 75  |
| 0 | 1 | 0 | 1 | 0 | 0 | 80  | 2.5 | 75  |
| 0 | 1 | 0 | 1 | 0 | 0 | 81  | 2.5 | 75  |
| 0 | 1 | 0 | 1 | 0 | 0 | 82  | 2.5 | 75  |
| 0 | 1 | 0 | 1 | 0 | 0 | 83  | 2.5 | 75  |
| 0 | 1 | 0 | 1 | 0 | 0 | 84  | 2.5 | 75  |
| 0 | 1 | 0 | 1 | 0 | 0 | 85  | 2.5 | 75  |
| 0 | 1 | 0 | 1 | 0 | 0 | 86  | 2.5 | 75  |
| 0 | 1 | 0 | 1 | 0 | 0 | 87  | 2.5 | 75  |
| 0 | 1 | 0 | 1 | 0 | 0 | 88  | 2.5 | 75  |
| 0 | 1 | 0 | 1 | 0 | 0 | 89  | 2.5 | 75  |
| 0 | 1 | 0 | 1 | 0 | 0 | 121 | 2.5 | 135 |
| 0 | 1 | 0 | 1 | 0 | 0 | 122 | 2.5 | 135 |
| 0 | 1 | 0 | 1 | 0 | 0 | 123 | 2.5 | 135 |
| 0 | 1 | 0 | 1 | 0 | 0 | 124 | 2.5 | 135 |
| 0 | 1 | 0 | 1 | 0 | 0 | 125 | 2.5 | 135 |
| 0 | 1 | 0 | 1 | 0 | 0 | 126 | 2.5 | 135 |
| 0 | 1 | 0 | 1 | 0 | 0 | 127 | 2.5 | 135 |
| 0 | 1 | 0 | 1 | 0 | 0 | 128 | 2.5 | 135 |
| 0 | 1 | 0 | 1 | 0 | 0 | 129 | 2.5 | 135 |
| 0 | 1 | 0 | 1 | 0 | 0 | 130 | 2.5 | 135 |
| 0 | 1 | 0 | 1 | 0 | 0 | 131 | 2.5 | 135 |
| 0 | 1 | 0 | 1 | 0 | 0 | 132 | 2.5 | 135 |
| 0 | 1 | 0 | 1 | 0 | 0 | 133 | 2.5 | 135 |

|   |   |   |   |   |   |     |     |     |
|---|---|---|---|---|---|-----|-----|-----|
| 0 | 1 | 0 | 1 | 0 | 0 | 134 | 2.5 | 135 |
| 0 | 1 | 0 | 1 | 0 | 0 | 135 | 2.5 | 135 |
| 0 | 1 | 0 | 1 | 0 | 0 | 136 | 2.5 | 135 |
| 0 | 1 | 0 | 1 | 0 | 0 | 137 | 2.5 | 135 |
| 0 | 1 | 0 | 1 | 0 | 0 | 138 | 2.5 | 135 |
| 0 | 1 | 0 | 1 | 0 | 0 | 139 | 2.5 | 135 |
| 0 | 1 | 0 | 1 | 0 | 0 | 140 | 2.5 | 135 |
| 0 | 1 | 0 | 1 | 0 | 0 | 141 | 2.5 | 135 |
| 0 | 1 | 0 | 1 | 0 | 0 | 142 | 2.5 | 135 |
| 0 | 1 | 0 | 1 | 0 | 0 | 143 | 2.5 | 135 |
| 0 | 1 | 0 | 1 | 0 | 0 | 144 | 2.5 | 135 |
| 0 | 1 | 0 | 1 | 0 | 0 | 145 | 2.5 | 135 |
| 0 | 1 | 0 | 1 | 0 | 0 | 146 | 2.5 | 135 |
| 0 | 1 | 0 | 1 | 0 | 0 | 147 | 2.5 | 135 |
| 0 | 1 | 0 | 1 | 0 | 0 | 148 | 2.5 | 135 |
| 0 | 1 | 0 | 1 | 0 | 0 | 149 | 2.5 | 135 |
| 0 | 1 | 0 | 1 | 0 | 0 | 150 | 2.5 | 150 |
| 0 | 1 | 0 | 1 | 0 | 0 | 151 | 2.5 | 165 |
| 0 | 1 | 0 | 1 | 0 | 0 | 152 | 2.5 | 165 |
| 0 | 1 | 0 | 1 | 0 | 0 | 153 | 2.5 | 165 |
| 0 | 1 | 0 | 1 | 0 | 0 | 154 | 2.5 | 165 |
| 0 | 1 | 0 | 1 | 0 | 0 | 155 | 2.5 | 165 |
| 0 | 1 | 0 | 1 | 0 | 0 | 156 | 2.5 | 165 |
| 0 | 1 | 0 | 1 | 0 | 0 | 157 | 2.5 | 165 |
| 0 | 1 | 0 | 1 | 0 | 0 | 158 | 2.5 | 165 |
| 0 | 1 | 0 | 1 | 0 | 0 | 159 | 2.5 | 165 |
| 0 | 1 | 0 | 1 | 0 | 0 | 160 | 2.5 | 165 |
| 0 | 1 | 0 | 1 | 0 | 0 | 161 | 2.5 | 165 |
| 0 | 1 | 0 | 1 | 0 | 0 | 162 | 2.5 | 165 |
| 0 | 1 | 0 | 1 | 0 | 0 | 163 | 2.5 | 165 |
| 0 | 1 | 0 | 1 | 0 | 0 | 164 | 2.5 | 165 |
| 0 | 1 | 0 | 1 | 0 | 0 | 165 | 2.5 | 165 |
| 0 | 1 | 0 | 1 | 0 | 0 | 166 | 2.5 | 165 |
| 0 | 1 | 0 | 1 | 0 | 0 | 167 | 2.5 | 165 |
| 0 | 1 | 0 | 1 | 0 | 0 | 168 | 2.5 | 165 |
| 0 | 1 | 0 | 1 | 0 | 0 | 169 | 2.5 | 165 |
| 0 | 1 | 0 | 1 | 0 | 0 | 170 | 2.5 | 165 |
| 0 | 1 | 0 | 1 | 0 | 0 | 171 | 2.5 | 165 |
| 0 | 1 | 0 | 1 | 0 | 0 | 172 | 2.5 | 165 |
| 0 | 1 | 0 | 1 | 0 | 0 | 173 | 2.5 | 165 |
| 0 | 1 | 0 | 1 | 0 | 0 | 174 | 2.5 | 165 |
| 0 | 1 | 0 | 1 | 0 | 0 | 175 | 2.5 | 165 |
| 0 | 1 | 0 | 1 | 0 | 0 | 176 | 2.5 | 165 |
| 0 | 1 | 0 | 1 | 0 | 0 | 177 | 2.5 | 165 |
| 0 | 1 | 0 | 1 | 0 | 0 | 178 | 2.5 | 165 |
| 0 | 1 | 0 | 1 | 0 | 0 | 179 | 2.5 | 165 |

|   |   |   |   |   |   |     |     |     |
|---|---|---|---|---|---|-----|-----|-----|
| 0 | 1 | 0 | 1 | 0 | 0 | 180 | 2.5 | 180 |
| 0 | 1 | 0 | 0 | 1 | 0 | 0   | 2.5 | 0   |
| 0 | 1 | 0 | 0 | 1 | 0 | 1   | 2.5 | 15  |
| 0 | 1 | 0 | 0 | 1 | 0 | 2   | 2.5 | 15  |
| 0 | 1 | 0 | 0 | 1 | 0 | 3   | 2.5 | 15  |
| 0 | 1 | 0 | 0 | 1 | 0 | 4   | 2.5 | 15  |
| 0 | 1 | 0 | 0 | 1 | 0 | 5   | 2.5 | 15  |
| 0 | 1 | 0 | 0 | 1 | 0 | 6   | 2.5 | 15  |
| 0 | 1 | 0 | 0 | 1 | 0 | 7   | 2.5 | 15  |
| 0 | 1 | 0 | 0 | 1 | 0 | 8   | 2.5 | 15  |
| 0 | 1 | 0 | 0 | 1 | 0 | 9   | 2.5 | 15  |
| 0 | 1 | 0 | 0 | 1 | 0 | 10  | 2.5 | 15  |
| 0 | 1 | 0 | 0 | 1 | 0 | 11  | 2.5 | 15  |
| 0 | 1 | 0 | 0 | 1 | 0 | 12  | 2.5 | 15  |
| 0 | 1 | 0 | 0 | 1 | 0 | 13  | 2.5 | 15  |
| 0 | 1 | 0 | 0 | 1 | 0 | 14  | 2.5 | 15  |
| 0 | 1 | 0 | 0 | 1 | 0 | 15  | 2.5 | 15  |
| 0 | 1 | 0 | 0 | 1 | 0 | 16  | 2.5 | 15  |
| 0 | 1 | 0 | 0 | 1 | 0 | 17  | 2.5 | 15  |
| 0 | 1 | 0 | 0 | 1 | 0 | 18  | 2.5 | 15  |
| 0 | 1 | 0 | 0 | 1 | 0 | 19  | 2.5 | 15  |
| 0 | 1 | 0 | 0 | 1 | 0 | 20  | 2.5 | 15  |
| 0 | 1 | 0 | 0 | 1 | 0 | 21  | 2.5 | 15  |
| 0 | 1 | 0 | 0 | 1 | 0 | 22  | 2.5 | 15  |
| 0 | 1 | 0 | 0 | 1 | 0 | 23  | 2.5 | 15  |
| 0 | 1 | 0 | 0 | 1 | 0 | 24  | 2.5 | 15  |
| 0 | 1 | 0 | 0 | 1 | 0 | 25  | 2.5 | 15  |
| 0 | 1 | 0 | 0 | 1 | 0 | 26  | 2.5 | 15  |
| 0 | 1 | 0 | 0 | 1 | 0 | 27  | 2.5 | 15  |
| 0 | 1 | 0 | 0 | 1 | 0 | 28  | 2.5 | 15  |
| 0 | 1 | 0 | 0 | 1 | 0 | 29  | 2.5 | 15  |
| 0 | 1 | 0 | 0 | 1 | 0 | 61  | 2.5 | 75  |
| 0 | 1 | 0 | 0 | 1 | 0 | 62  | 2.5 | 75  |
| 0 | 1 | 0 | 0 | 1 | 0 | 63  | 2.5 | 75  |
| 0 | 1 | 0 | 0 | 1 | 0 | 64  | 2.5 | 75  |
| 0 | 1 | 0 | 0 | 1 | 0 | 65  | 2.5 | 75  |
| 0 | 1 | 0 | 0 | 1 | 0 | 66  | 2.5 | 75  |
| 0 | 1 | 0 | 0 | 1 | 0 | 67  | 2.5 | 75  |
| 0 | 1 | 0 | 0 | 1 | 0 | 68  | 2.5 | 75  |
| 0 | 1 | 0 | 0 | 1 | 0 | 69  | 2.5 | 75  |
| 0 | 1 | 0 | 0 | 1 | 0 | 70  | 2.5 | 75  |
| 0 | 1 | 0 | 0 | 1 | 0 | 71  | 2.5 | 75  |
| 0 | 1 | 0 | 0 | 1 | 0 | 72  | 2.5 | 75  |
| 0 | 1 | 0 | 0 | 1 | 0 | 73  | 2.5 | 75  |
| 0 | 1 | 0 | 0 | 1 | 0 | 74  | 2.5 | 75  |
| 0 | 1 | 0 | 0 | 1 | 0 | 75  | 2.5 | 75  |

|   |   |   |   |   |   |     |     |     |
|---|---|---|---|---|---|-----|-----|-----|
| 0 | 1 | 0 | 0 | 1 | 0 | 76  | 2.5 | 75  |
| 0 | 1 | 0 | 0 | 1 | 0 | 77  | 2.5 | 75  |
| 0 | 1 | 0 | 0 | 1 | 0 | 78  | 2.5 | 75  |
| 0 | 1 | 0 | 0 | 1 | 0 | 79  | 2.5 | 75  |
| 0 | 1 | 0 | 0 | 1 | 0 | 80  | 2.5 | 75  |
| 0 | 1 | 0 | 0 | 1 | 0 | 81  | 2.5 | 75  |
| 0 | 1 | 0 | 0 | 1 | 0 | 82  | 2.5 | 75  |
| 0 | 1 | 0 | 0 | 1 | 0 | 83  | 2.5 | 75  |
| 0 | 1 | 0 | 0 | 1 | 0 | 84  | 2.5 | 75  |
| 0 | 1 | 0 | 0 | 1 | 0 | 85  | 2.5 | 75  |
| 0 | 1 | 0 | 0 | 1 | 0 | 86  | 2.5 | 75  |
| 0 | 1 | 0 | 0 | 1 | 0 | 87  | 2.5 | 75  |
| 0 | 1 | 0 | 0 | 1 | 0 | 88  | 2.5 | 75  |
| 0 | 1 | 0 | 0 | 1 | 0 | 89  | 2.5 | 75  |
| 0 | 1 | 0 | 0 | 1 | 0 | 90  | 2.5 | 90  |
| 0 | 1 | 0 | 0 | 1 | 0 | 91  | 2.5 | 105 |
| 0 | 1 | 0 | 0 | 1 | 0 | 92  | 2.5 | 105 |
| 0 | 1 | 0 | 0 | 1 | 0 | 93  | 2.5 | 105 |
| 0 | 1 | 0 | 0 | 1 | 0 | 94  | 2.5 | 105 |
| 0 | 1 | 0 | 0 | 1 | 0 | 95  | 2.5 | 105 |
| 0 | 1 | 0 | 0 | 1 | 0 | 96  | 2.5 | 105 |
| 0 | 1 | 0 | 0 | 1 | 0 | 97  | 2.5 | 105 |
| 0 | 1 | 0 | 0 | 1 | 0 | 98  | 2.5 | 105 |
| 0 | 1 | 0 | 0 | 1 | 0 | 99  | 2.5 | 105 |
| 0 | 1 | 0 | 0 | 1 | 0 | 100 | 2.5 | 105 |
| 0 | 1 | 0 | 0 | 1 | 0 | 101 | 2.5 | 105 |
| 0 | 1 | 0 | 0 | 1 | 0 | 102 | 2.5 | 105 |
| 0 | 1 | 0 | 0 | 1 | 0 | 103 | 2.5 | 105 |
| 0 | 1 | 0 | 0 | 1 | 0 | 104 | 2.5 | 105 |
| 0 | 1 | 0 | 0 | 1 | 0 | 105 | 2.5 | 105 |
| 0 | 1 | 0 | 0 | 1 | 0 | 106 | 2.5 | 105 |
| 0 | 1 | 0 | 0 | 1 | 0 | 107 | 2.5 | 105 |
| 0 | 1 | 0 | 0 | 1 | 0 | 108 | 2.5 | 105 |
| 0 | 1 | 0 | 0 | 1 | 0 | 109 | 2.5 | 105 |
| 0 | 1 | 0 | 0 | 1 | 0 | 110 | 2.5 | 105 |
| 0 | 1 | 0 | 0 | 1 | 0 | 111 | 2.5 | 105 |
| 0 | 1 | 0 | 0 | 1 | 0 | 112 | 2.5 | 105 |
| 0 | 1 | 0 | 0 | 1 | 0 | 113 | 2.5 | 105 |
| 0 | 1 | 0 | 0 | 1 | 0 | 114 | 2.5 | 105 |
| 0 | 1 | 0 | 0 | 1 | 0 | 115 | 2.5 | 105 |
| 0 | 1 | 0 | 0 | 1 | 0 | 116 | 2.5 | 105 |
| 0 | 1 | 0 | 0 | 1 | 0 | 117 | 2.5 | 105 |
| 0 | 1 | 0 | 0 | 1 | 0 | 118 | 2.5 | 105 |
| 0 | 1 | 0 | 0 | 1 | 0 | 119 | 2.5 | 105 |
| 0 | 1 | 0 | 0 | 1 | 0 | 151 | 2.5 | 165 |
| 0 | 1 | 0 | 0 | 1 | 0 | 152 | 2.5 | 165 |

|   |   |   |   |   |   |     |     |     |
|---|---|---|---|---|---|-----|-----|-----|
| 0 | 1 | 0 | 0 | 1 | 0 | 153 | 2.5 | 165 |
| 0 | 1 | 0 | 0 | 1 | 0 | 154 | 2.5 | 165 |
| 0 | 1 | 0 | 0 | 1 | 0 | 155 | 2.5 | 165 |
| 0 | 1 | 0 | 0 | 1 | 0 | 156 | 2.5 | 165 |
| 0 | 1 | 0 | 0 | 1 | 0 | 157 | 2.5 | 165 |
| 0 | 1 | 0 | 0 | 1 | 0 | 158 | 2.5 | 165 |
| 0 | 1 | 0 | 0 | 1 | 0 | 159 | 2.5 | 165 |
| 0 | 1 | 0 | 0 | 1 | 0 | 160 | 2.5 | 165 |
| 0 | 1 | 0 | 0 | 1 | 0 | 161 | 2.5 | 165 |
| 0 | 1 | 0 | 0 | 1 | 0 | 162 | 2.5 | 165 |
| 0 | 1 | 0 | 0 | 1 | 0 | 163 | 2.5 | 165 |
| 0 | 1 | 0 | 0 | 1 | 0 | 164 | 2.5 | 165 |
| 0 | 1 | 0 | 0 | 1 | 0 | 165 | 2.5 | 165 |
| 0 | 1 | 0 | 0 | 1 | 0 | 166 | 2.5 | 165 |
| 0 | 1 | 0 | 0 | 1 | 0 | 167 | 2.5 | 165 |
| 0 | 1 | 0 | 0 | 1 | 0 | 168 | 2.5 | 165 |
| 0 | 1 | 0 | 0 | 1 | 0 | 169 | 2.5 | 165 |
| 0 | 1 | 0 | 0 | 1 | 0 | 170 | 2.5 | 165 |
| 0 | 1 | 0 | 0 | 1 | 0 | 171 | 2.5 | 165 |
| 0 | 1 | 0 | 0 | 1 | 0 | 172 | 2.5 | 165 |
| 0 | 1 | 0 | 0 | 1 | 0 | 173 | 2.5 | 165 |
| 0 | 1 | 0 | 0 | 1 | 0 | 174 | 2.5 | 165 |
| 0 | 1 | 0 | 0 | 1 | 0 | 175 | 2.5 | 165 |
| 0 | 1 | 0 | 0 | 1 | 0 | 176 | 2.5 | 165 |
| 0 | 1 | 0 | 0 | 1 | 0 | 177 | 2.5 | 165 |
| 0 | 1 | 0 | 0 | 1 | 0 | 178 | 2.5 | 165 |
| 0 | 1 | 0 | 0 | 1 | 0 | 179 | 2.5 | 165 |
| 0 | 1 | 0 | 0 | 1 | 0 | 180 | 2.5 | 180 |
| 0 | 1 | 0 | 0 | 0 | 1 | 0   | 2.5 | 0   |
| 0 | 1 | 0 | 0 | 0 | 1 | 1   | 2.5 | 15  |
| 0 | 1 | 0 | 0 | 0 | 1 | 2   | 2.5 | 15  |
| 0 | 1 | 0 | 0 | 0 | 1 | 3   | 2.5 | 15  |
| 0 | 1 | 0 | 0 | 0 | 1 | 4   | 2.5 | 15  |
| 0 | 1 | 0 | 0 | 0 | 1 | 5   | 2.5 | 15  |
| 0 | 1 | 0 | 0 | 0 | 1 | 6   | 2.5 | 15  |
| 0 | 1 | 0 | 0 | 0 | 1 | 7   | 2.5 | 15  |
| 0 | 1 | 0 | 0 | 0 | 1 | 8   | 2.5 | 15  |
| 0 | 1 | 0 | 0 | 0 | 1 | 9   | 2.5 | 15  |
| 0 | 1 | 0 | 0 | 0 | 1 | 10  | 2.5 | 15  |
| 0 | 1 | 0 | 0 | 0 | 1 | 11  | 2.5 | 15  |
| 0 | 1 | 0 | 0 | 0 | 1 | 12  | 2.5 | 15  |
| 0 | 1 | 0 | 0 | 0 | 1 | 13  | 2.5 | 15  |
| 0 | 1 | 0 | 0 | 0 | 1 | 14  | 2.5 | 15  |
| 0 | 1 | 0 | 0 | 0 | 1 | 15  | 2.5 | 15  |
| 0 | 1 | 0 | 0 | 0 | 1 | 16  | 2.5 | 15  |
| 0 | 1 | 0 | 0 | 0 | 1 | 17  | 2.5 | 15  |

|   |   |   |   |   |   |    |     |     |
|---|---|---|---|---|---|----|-----|-----|
| 0 | 1 | 0 | 0 | 0 | 1 | 18 | 2.5 | 15  |
| 0 | 1 | 0 | 0 | 0 | 1 | 19 | 2.5 | 15  |
| 0 | 1 | 0 | 0 | 0 | 1 | 20 | 2.5 | 15  |
| 0 | 1 | 0 | 0 | 0 | 1 | 21 | 2.5 | 15  |
| 0 | 1 | 0 | 0 | 0 | 1 | 22 | 2.5 | 15  |
| 0 | 1 | 0 | 0 | 0 | 1 | 23 | 2.5 | 15  |
| 0 | 1 | 0 | 0 | 0 | 1 | 24 | 2.5 | 15  |
| 0 | 1 | 0 | 0 | 0 | 1 | 25 | 2.5 | 15  |
| 0 | 1 | 0 | 0 | 0 | 1 | 26 | 2.5 | 15  |
| 0 | 1 | 0 | 0 | 0 | 1 | 27 | 2.5 | 15  |
| 0 | 1 | 0 | 0 | 0 | 1 | 28 | 2.5 | 15  |
| 0 | 1 | 0 | 0 | 0 | 1 | 29 | 2.5 | 15  |
| 0 | 1 | 0 | 0 | 0 | 1 | 61 | 2.5 | 75  |
| 0 | 1 | 0 | 0 | 0 | 1 | 62 | 2.5 | 75  |
| 0 | 1 | 0 | 0 | 0 | 1 | 63 | 2.5 | 75  |
| 0 | 1 | 0 | 0 | 0 | 1 | 64 | 2.5 | 75  |
| 0 | 1 | 0 | 0 | 0 | 1 | 65 | 2.5 | 75  |
| 0 | 1 | 0 | 0 | 0 | 1 | 66 | 2.5 | 75  |
| 0 | 1 | 0 | 0 | 0 | 1 | 67 | 2.5 | 75  |
| 0 | 1 | 0 | 0 | 0 | 1 | 68 | 2.5 | 75  |
| 0 | 1 | 0 | 0 | 0 | 1 | 69 | 2.5 | 75  |
| 0 | 1 | 0 | 0 | 0 | 1 | 70 | 2.5 | 75  |
| 0 | 1 | 0 | 0 | 0 | 1 | 71 | 2.5 | 75  |
| 0 | 1 | 0 | 0 | 0 | 1 | 72 | 2.5 | 75  |
| 0 | 1 | 0 | 0 | 0 | 1 | 73 | 2.5 | 75  |
| 0 | 1 | 0 | 0 | 0 | 1 | 74 | 2.5 | 75  |
| 0 | 1 | 0 | 0 | 0 | 1 | 75 | 2.5 | 75  |
| 0 | 1 | 0 | 0 | 0 | 1 | 76 | 2.5 | 75  |
| 0 | 1 | 0 | 0 | 0 | 1 | 77 | 2.5 | 75  |
| 0 | 1 | 0 | 0 | 0 | 1 | 78 | 2.5 | 75  |
| 0 | 1 | 0 | 0 | 0 | 1 | 79 | 2.5 | 75  |
| 0 | 1 | 0 | 0 | 0 | 1 | 80 | 2.5 | 75  |
| 0 | 1 | 0 | 0 | 0 | 1 | 81 | 2.5 | 75  |
| 0 | 1 | 0 | 0 | 0 | 1 | 82 | 2.5 | 75  |
| 0 | 1 | 0 | 0 | 0 | 1 | 83 | 2.5 | 75  |
| 0 | 1 | 0 | 0 | 0 | 1 | 84 | 2.5 | 75  |
| 0 | 1 | 0 | 0 | 0 | 1 | 85 | 2.5 | 75  |
| 0 | 1 | 0 | 0 | 0 | 1 | 86 | 2.5 | 75  |
| 0 | 1 | 0 | 0 | 0 | 1 | 87 | 2.5 | 75  |
| 0 | 1 | 0 | 0 | 0 | 1 | 88 | 2.5 | 75  |
| 0 | 1 | 0 | 0 | 0 | 1 | 89 | 2.5 | 75  |
| 0 | 1 | 0 | 0 | 0 | 1 | 90 | 2.5 | 90  |
| 0 | 1 | 0 | 0 | 0 | 1 | 91 | 2.5 | 105 |
| 0 | 1 | 0 | 0 | 0 | 1 | 92 | 2.5 | 105 |
| 0 | 1 | 0 | 0 | 0 | 1 | 93 | 2.5 | 105 |
| 0 | 1 | 0 | 0 | 0 | 1 | 94 | 2.5 | 105 |

|   |   |   |   |   |   |     |     |     |
|---|---|---|---|---|---|-----|-----|-----|
| 0 | 1 | 0 | 0 | 0 | 1 | 95  | 2.5 | 105 |
| 0 | 1 | 0 | 0 | 0 | 1 | 96  | 2.5 | 105 |
| 0 | 1 | 0 | 0 | 0 | 1 | 97  | 2.5 | 105 |
| 0 | 1 | 0 | 0 | 0 | 1 | 98  | 2.5 | 105 |
| 0 | 1 | 0 | 0 | 0 | 1 | 99  | 2.5 | 105 |
| 0 | 1 | 0 | 0 | 0 | 1 | 100 | 2.5 | 105 |
| 0 | 1 | 0 | 0 | 0 | 1 | 101 | 2.5 | 105 |
| 0 | 1 | 0 | 0 | 0 | 1 | 102 | 2.5 | 105 |
| 0 | 1 | 0 | 0 | 0 | 1 | 103 | 2.5 | 105 |
| 0 | 1 | 0 | 0 | 0 | 1 | 104 | 2.5 | 105 |
| 0 | 1 | 0 | 0 | 0 | 1 | 105 | 2.5 | 105 |
| 0 | 1 | 0 | 0 | 0 | 1 | 106 | 2.5 | 105 |
| 0 | 1 | 0 | 0 | 0 | 1 | 107 | 2.5 | 105 |
| 0 | 1 | 0 | 0 | 0 | 1 | 108 | 2.5 | 105 |
| 0 | 1 | 0 | 0 | 0 | 1 | 109 | 2.5 | 105 |
| 0 | 1 | 0 | 0 | 0 | 1 | 110 | 2.5 | 105 |
| 0 | 1 | 0 | 0 | 0 | 1 | 111 | 2.5 | 105 |
| 0 | 1 | 0 | 0 | 0 | 1 | 112 | 2.5 | 105 |
| 0 | 1 | 0 | 0 | 0 | 1 | 113 | 2.5 | 105 |
| 0 | 1 | 0 | 0 | 0 | 1 | 114 | 2.5 | 105 |
| 0 | 1 | 0 | 0 | 0 | 1 | 115 | 2.5 | 105 |
| 0 | 1 | 0 | 0 | 0 | 1 | 116 | 2.5 | 105 |
| 0 | 1 | 0 | 0 | 0 | 1 | 117 | 2.5 | 105 |
| 0 | 1 | 0 | 0 | 0 | 1 | 118 | 2.5 | 105 |
| 0 | 1 | 0 | 0 | 0 | 1 | 119 | 2.5 | 105 |
| 0 | 1 | 0 | 0 | 0 | 1 | 120 | 2.5 | 120 |
| 0 | 1 | 0 | 0 | 0 | 1 | 121 | 2.5 | 135 |
| 0 | 1 | 0 | 0 | 0 | 1 | 122 | 2.5 | 135 |
| 0 | 1 | 0 | 0 | 0 | 1 | 123 | 2.5 | 135 |
| 0 | 1 | 0 | 0 | 0 | 1 | 124 | 2.5 | 135 |
| 0 | 1 | 0 | 0 | 0 | 1 | 125 | 2.5 | 135 |
| 0 | 1 | 0 | 0 | 0 | 1 | 126 | 2.5 | 135 |
| 0 | 1 | 0 | 0 | 0 | 1 | 127 | 2.5 | 135 |
| 0 | 1 | 0 | 0 | 0 | 1 | 128 | 2.5 | 135 |
| 0 | 1 | 0 | 0 | 0 | 1 | 129 | 2.5 | 135 |
| 0 | 1 | 0 | 0 | 0 | 1 | 130 | 2.5 | 135 |
| 0 | 1 | 0 | 0 | 0 | 1 | 131 | 2.5 | 135 |
| 0 | 1 | 0 | 0 | 0 | 1 | 132 | 2.5 | 135 |
| 0 | 1 | 0 | 0 | 0 | 1 | 133 | 2.5 | 135 |
| 0 | 1 | 0 | 0 | 0 | 1 | 134 | 2.5 | 135 |
| 0 | 1 | 0 | 0 | 0 | 1 | 135 | 2.5 | 135 |
| 0 | 1 | 0 | 0 | 0 | 1 | 136 | 2.5 | 135 |
| 0 | 1 | 0 | 0 | 0 | 1 | 137 | 2.5 | 135 |
| 0 | 1 | 0 | 0 | 0 | 1 | 138 | 2.5 | 135 |
| 0 | 1 | 0 | 0 | 0 | 1 | 139 | 2.5 | 135 |
| 0 | 1 | 0 | 0 | 0 | 1 | 140 | 2.5 | 135 |

|   |   |   |   |   |   |     |     |     |
|---|---|---|---|---|---|-----|-----|-----|
| 0 | 1 | 0 | 0 | 0 | 1 | 141 | 2.5 | 135 |
| 0 | 1 | 0 | 0 | 0 | 1 | 142 | 2.5 | 135 |
| 0 | 1 | 0 | 0 | 0 | 1 | 143 | 2.5 | 135 |
| 0 | 1 | 0 | 0 | 0 | 1 | 144 | 2.5 | 135 |
| 0 | 1 | 0 | 0 | 0 | 1 | 145 | 2.5 | 135 |
| 0 | 1 | 0 | 0 | 0 | 1 | 146 | 2.5 | 135 |
| 0 | 1 | 0 | 0 | 0 | 1 | 147 | 2.5 | 135 |
| 0 | 1 | 0 | 0 | 0 | 1 | 148 | 2.5 | 135 |
| 0 | 1 | 0 | 0 | 0 | 1 | 149 | 2.5 | 135 |
| 0 | 0 | 1 | 1 | 0 | 0 | 0   | 2.5 | 0   |
| 0 | 0 | 1 | 1 | 0 | 0 | 1   | 2.5 | 15  |
| 0 | 0 | 1 | 1 | 0 | 0 | 2   | 2.5 | 15  |
| 0 | 0 | 1 | 1 | 0 | 0 | 3   | 2.5 | 15  |
| 0 | 0 | 1 | 1 | 0 | 0 | 4   | 2.5 | 15  |
| 0 | 0 | 1 | 1 | 0 | 0 | 5   | 2.5 | 15  |
| 0 | 0 | 1 | 1 | 0 | 0 | 6   | 2.5 | 15  |
| 0 | 0 | 1 | 1 | 0 | 0 | 7   | 2.5 | 15  |
| 0 | 0 | 1 | 1 | 0 | 0 | 8   | 2.5 | 15  |
| 0 | 0 | 1 | 1 | 0 | 0 | 9   | 2.5 | 15  |
| 0 | 0 | 1 | 1 | 0 | 0 | 10  | 2.5 | 15  |
| 0 | 0 | 1 | 1 | 0 | 0 | 11  | 2.5 | 15  |
| 0 | 0 | 1 | 1 | 0 | 0 | 12  | 2.5 | 15  |
| 0 | 0 | 1 | 1 | 0 | 0 | 13  | 2.5 | 15  |
| 0 | 0 | 1 | 1 | 0 | 0 | 14  | 2.5 | 15  |
| 0 | 0 | 1 | 1 | 0 | 0 | 15  | 2.5 | 15  |
| 0 | 0 | 1 | 1 | 0 | 0 | 16  | 2.5 | 15  |
| 0 | 0 | 1 | 1 | 0 | 0 | 17  | 2.5 | 15  |
| 0 | 0 | 1 | 1 | 0 | 0 | 18  | 2.5 | 15  |
| 0 | 0 | 1 | 1 | 0 | 0 | 19  | 2.5 | 15  |
| 0 | 0 | 1 | 1 | 0 | 0 | 20  | 2.5 | 15  |
| 0 | 0 | 1 | 1 | 0 | 0 | 21  | 2.5 | 15  |
| 0 | 0 | 1 | 1 | 0 | 0 | 22  | 2.5 | 15  |
| 0 | 0 | 1 | 1 | 0 | 0 | 23  | 2.5 | 15  |
| 0 | 0 | 1 | 1 | 0 | 0 | 24  | 2.5 | 15  |
| 0 | 0 | 1 | 1 | 0 | 0 | 25  | 2.5 | 15  |
| 0 | 0 | 1 | 1 | 0 | 0 | 26  | 2.5 | 15  |
| 0 | 0 | 1 | 1 | 0 | 0 | 27  | 2.5 | 15  |
| 0 | 0 | 1 | 1 | 0 | 0 | 28  | 2.5 | 15  |
| 0 | 0 | 1 | 1 | 0 | 0 | 29  | 2.5 | 15  |
| 0 | 0 | 1 | 1 | 0 | 0 | 30  | 2.5 | 30  |
| 0 | 0 | 1 | 1 | 0 | 0 | 31  | 2.5 | 45  |
| 0 | 0 | 1 | 1 | 0 | 0 | 32  | 2.5 | 45  |
| 0 | 0 | 1 | 1 | 0 | 0 | 33  | 2.5 | 45  |
| 0 | 0 | 1 | 1 | 0 | 0 | 34  | 2.5 | 45  |
| 0 | 0 | 1 | 1 | 0 | 0 | 35  | 2.5 | 45  |
| 0 | 0 | 1 | 1 | 0 | 0 | 36  | 2.5 | 45  |

|   |   |   |   |   |   |     |     |     |
|---|---|---|---|---|---|-----|-----|-----|
| 0 | 0 | 1 | 1 | 0 | 0 | 37  | 2.5 | 45  |
| 0 | 0 | 1 | 1 | 0 | 0 | 38  | 2.5 | 45  |
| 0 | 0 | 1 | 1 | 0 | 0 | 39  | 2.5 | 45  |
| 0 | 0 | 1 | 1 | 0 | 0 | 40  | 2.5 | 45  |
| 0 | 0 | 1 | 1 | 0 | 0 | 41  | 2.5 | 45  |
| 0 | 0 | 1 | 1 | 0 | 0 | 42  | 2.5 | 45  |
| 0 | 0 | 1 | 1 | 0 | 0 | 43  | 2.5 | 45  |
| 0 | 0 | 1 | 1 | 0 | 0 | 44  | 2.5 | 45  |
| 0 | 0 | 1 | 1 | 0 | 0 | 45  | 2.5 | 45  |
| 0 | 0 | 1 | 1 | 0 | 0 | 46  | 2.5 | 45  |
| 0 | 0 | 1 | 1 | 0 | 0 | 47  | 2.5 | 45  |
| 0 | 0 | 1 | 1 | 0 | 0 | 48  | 2.5 | 45  |
| 0 | 0 | 1 | 1 | 0 | 0 | 49  | 2.5 | 45  |
| 0 | 0 | 1 | 1 | 0 | 0 | 50  | 2.5 | 45  |
| 0 | 0 | 1 | 1 | 0 | 0 | 51  | 2.5 | 45  |
| 0 | 0 | 1 | 1 | 0 | 0 | 52  | 2.5 | 45  |
| 0 | 0 | 1 | 1 | 0 | 0 | 53  | 2.5 | 45  |
| 0 | 0 | 1 | 1 | 0 | 0 | 54  | 2.5 | 45  |
| 0 | 0 | 1 | 1 | 0 | 0 | 55  | 2.5 | 45  |
| 0 | 0 | 1 | 1 | 0 | 0 | 56  | 2.5 | 45  |
| 0 | 0 | 1 | 1 | 0 | 0 | 57  | 2.5 | 45  |
| 0 | 0 | 1 | 1 | 0 | 0 | 58  | 2.5 | 45  |
| 0 | 0 | 1 | 1 | 0 | 0 | 59  | 2.5 | 45  |
| 0 | 0 | 1 | 1 | 0 | 0 | 121 | 2.5 | 135 |
| 0 | 0 | 1 | 1 | 0 | 0 | 122 | 2.5 | 135 |
| 0 | 0 | 1 | 1 | 0 | 0 | 123 | 2.5 | 135 |
| 0 | 0 | 1 | 1 | 0 | 0 | 124 | 2.5 | 135 |
| 0 | 0 | 1 | 1 | 0 | 0 | 125 | 2.5 | 135 |
| 0 | 0 | 1 | 1 | 0 | 0 | 126 | 2.5 | 135 |
| 0 | 0 | 1 | 1 | 0 | 0 | 127 | 2.5 | 135 |
| 0 | 0 | 1 | 1 | 0 | 0 | 128 | 2.5 | 135 |
| 0 | 0 | 1 | 1 | 0 | 0 | 129 | 2.5 | 135 |
| 0 | 0 | 1 | 1 | 0 | 0 | 130 | 2.5 | 135 |
| 0 | 0 | 1 | 1 | 0 | 0 | 131 | 2.5 | 135 |
| 0 | 0 | 1 | 1 | 0 | 0 | 132 | 2.5 | 135 |
| 0 | 0 | 1 | 1 | 0 | 0 | 133 | 2.5 | 135 |
| 0 | 0 | 1 | 1 | 0 | 0 | 134 | 2.5 | 135 |
| 0 | 0 | 1 | 1 | 0 | 0 | 135 | 2.5 | 135 |
| 0 | 0 | 1 | 1 | 0 | 0 | 136 | 2.5 | 135 |
| 0 | 0 | 1 | 1 | 0 | 0 | 137 | 2.5 | 135 |
| 0 | 0 | 1 | 1 | 0 | 0 | 138 | 2.5 | 135 |
| 0 | 0 | 1 | 1 | 0 | 0 | 139 | 2.5 | 135 |
| 0 | 0 | 1 | 1 | 0 | 0 | 140 | 2.5 | 135 |
| 0 | 0 | 1 | 1 | 0 | 0 | 141 | 2.5 | 135 |
| 0 | 0 | 1 | 1 | 0 | 0 | 142 | 2.5 | 135 |
| 0 | 0 | 1 | 1 | 0 | 0 | 143 | 2.5 | 135 |
| 0 | 0 | 1 | 1 | 0 | 0 | 144 | 2.5 | 135 |

|   |   |   |   |   |   |     |     |     |
|---|---|---|---|---|---|-----|-----|-----|
| 0 | 0 | 1 | 1 | 0 | 0 | 145 | 2.5 | 135 |
| 0 | 0 | 1 | 1 | 0 | 0 | 146 | 2.5 | 135 |
| 0 | 0 | 1 | 1 | 0 | 0 | 147 | 2.5 | 135 |
| 0 | 0 | 1 | 1 | 0 | 0 | 148 | 2.5 | 135 |
| 0 | 0 | 1 | 1 | 0 | 0 | 149 | 2.5 | 135 |
| 0 | 0 | 1 | 1 | 0 | 0 | 150 | 2.5 | 150 |
| 0 | 0 | 1 | 1 | 0 | 0 | 151 | 2.5 | 165 |
| 0 | 0 | 1 | 1 | 0 | 0 | 152 | 2.5 | 165 |
| 0 | 0 | 1 | 1 | 0 | 0 | 153 | 2.5 | 165 |
| 0 | 0 | 1 | 1 | 0 | 0 | 154 | 2.5 | 165 |
| 0 | 0 | 1 | 1 | 0 | 0 | 155 | 2.5 | 165 |
| 0 | 0 | 1 | 1 | 0 | 0 | 156 | 2.5 | 165 |
| 0 | 0 | 1 | 1 | 0 | 0 | 157 | 2.5 | 165 |
| 0 | 0 | 1 | 1 | 0 | 0 | 158 | 2.5 | 165 |
| 0 | 0 | 1 | 1 | 0 | 0 | 159 | 2.5 | 165 |
| 0 | 0 | 1 | 1 | 0 | 0 | 160 | 2.5 | 165 |
| 0 | 0 | 1 | 1 | 0 | 0 | 161 | 2.5 | 165 |
| 0 | 0 | 1 | 1 | 0 | 0 | 162 | 2.5 | 165 |
| 0 | 0 | 1 | 1 | 0 | 0 | 163 | 2.5 | 165 |
| 0 | 0 | 1 | 1 | 0 | 0 | 164 | 2.5 | 165 |
| 0 | 0 | 1 | 1 | 0 | 0 | 165 | 2.5 | 165 |
| 0 | 0 | 1 | 1 | 0 | 0 | 166 | 2.5 | 165 |
| 0 | 0 | 1 | 1 | 0 | 0 | 167 | 2.5 | 165 |
| 0 | 0 | 1 | 1 | 0 | 0 | 168 | 2.5 | 165 |
| 0 | 0 | 1 | 1 | 0 | 0 | 169 | 2.5 | 165 |
| 0 | 0 | 1 | 1 | 0 | 0 | 170 | 2.5 | 165 |
| 0 | 0 | 1 | 1 | 0 | 0 | 171 | 2.5 | 165 |
| 0 | 0 | 1 | 1 | 0 | 0 | 172 | 2.5 | 165 |
| 0 | 0 | 1 | 1 | 0 | 0 | 173 | 2.5 | 165 |
| 0 | 0 | 1 | 1 | 0 | 0 | 174 | 2.5 | 165 |
| 0 | 0 | 1 | 1 | 0 | 0 | 175 | 2.5 | 165 |
| 0 | 0 | 1 | 1 | 0 | 0 | 176 | 2.5 | 165 |
| 0 | 0 | 1 | 1 | 0 | 0 | 177 | 2.5 | 165 |
| 0 | 0 | 1 | 1 | 0 | 0 | 178 | 2.5 | 165 |
| 0 | 0 | 1 | 1 | 0 | 0 | 179 | 2.5 | 165 |
| 0 | 0 | 1 | 1 | 0 | 0 | 180 | 2.5 | 180 |
| 0 | 0 | 1 | 0 | 1 | 0 | 0   | 2.5 | 0   |
| 0 | 0 | 1 | 0 | 1 | 0 | 1   | 2.5 | 15  |
| 0 | 0 | 1 | 0 | 1 | 0 | 2   | 2.5 | 15  |
| 0 | 0 | 1 | 0 | 1 | 0 | 3   | 2.5 | 15  |
| 0 | 0 | 1 | 0 | 1 | 0 | 4   | 2.5 | 15  |
| 0 | 0 | 1 | 0 | 1 | 0 | 5   | 2.5 | 15  |
| 0 | 0 | 1 | 0 | 1 | 0 | 6   | 2.5 | 15  |
| 0 | 0 | 1 | 0 | 1 | 0 | 7   | 2.5 | 15  |
| 0 | 0 | 1 | 0 | 1 | 0 | 8   | 2.5 | 15  |
| 0 | 0 | 1 | 0 | 1 | 0 | 9   | 2.5 | 15  |

|   |   |   |   |   |   |    |     |    |
|---|---|---|---|---|---|----|-----|----|
| 0 | 0 | 1 | 0 | 1 | 0 | 10 | 2.5 | 15 |
| 0 | 0 | 1 | 0 | 1 | 0 | 11 | 2.5 | 15 |
| 0 | 0 | 1 | 0 | 1 | 0 | 12 | 2.5 | 15 |
| 0 | 0 | 1 | 0 | 1 | 0 | 13 | 2.5 | 15 |
| 0 | 0 | 1 | 0 | 1 | 0 | 14 | 2.5 | 15 |
| 0 | 0 | 1 | 0 | 1 | 0 | 15 | 2.5 | 15 |
| 0 | 0 | 1 | 0 | 1 | 0 | 16 | 2.5 | 15 |
| 0 | 0 | 1 | 0 | 1 | 0 | 17 | 2.5 | 15 |
| 0 | 0 | 1 | 0 | 1 | 0 | 18 | 2.5 | 15 |
| 0 | 0 | 1 | 0 | 1 | 0 | 19 | 2.5 | 15 |
| 0 | 0 | 1 | 0 | 1 | 0 | 20 | 2.5 | 15 |
| 0 | 0 | 1 | 0 | 1 | 0 | 21 | 2.5 | 15 |
| 0 | 0 | 1 | 0 | 1 | 0 | 22 | 2.5 | 15 |
| 0 | 0 | 1 | 0 | 1 | 0 | 23 | 2.5 | 15 |
| 0 | 0 | 1 | 0 | 1 | 0 | 24 | 2.5 | 15 |
| 0 | 0 | 1 | 0 | 1 | 0 | 25 | 2.5 | 15 |
| 0 | 0 | 1 | 0 | 1 | 0 | 26 | 2.5 | 15 |
| 0 | 0 | 1 | 0 | 1 | 0 | 27 | 2.5 | 15 |
| 0 | 0 | 1 | 0 | 1 | 0 | 28 | 2.5 | 15 |
| 0 | 0 | 1 | 0 | 1 | 0 | 29 | 2.5 | 15 |
| 0 | 0 | 1 | 0 | 1 | 0 | 30 | 2.5 | 30 |
| 0 | 0 | 1 | 0 | 1 | 0 | 31 | 2.5 | 45 |
| 0 | 0 | 1 | 0 | 1 | 0 | 32 | 2.5 | 45 |
| 0 | 0 | 1 | 0 | 1 | 0 | 33 | 2.5 | 45 |
| 0 | 0 | 1 | 0 | 1 | 0 | 34 | 2.5 | 45 |
| 0 | 0 | 1 | 0 | 1 | 0 | 35 | 2.5 | 45 |
| 0 | 0 | 1 | 0 | 1 | 0 | 36 | 2.5 | 45 |
| 0 | 0 | 1 | 0 | 1 | 0 | 37 | 2.5 | 45 |
| 0 | 0 | 1 | 0 | 1 | 0 | 38 | 2.5 | 45 |
| 0 | 0 | 1 | 0 | 1 | 0 | 39 | 2.5 | 45 |
| 0 | 0 | 1 | 0 | 1 | 0 | 40 | 2.5 | 45 |
| 0 | 0 | 1 | 0 | 1 | 0 | 41 | 2.5 | 45 |
| 0 | 0 | 1 | 0 | 1 | 0 | 42 | 2.5 | 45 |
| 0 | 0 | 1 | 0 | 1 | 0 | 43 | 2.5 | 45 |
| 0 | 0 | 1 | 0 | 1 | 0 | 44 | 2.5 | 45 |
| 0 | 0 | 1 | 0 | 1 | 0 | 45 | 2.5 | 45 |
| 0 | 0 | 1 | 0 | 1 | 0 | 46 | 2.5 | 45 |
| 0 | 0 | 1 | 0 | 1 | 0 | 47 | 2.5 | 45 |
| 0 | 0 | 1 | 0 | 1 | 0 | 48 | 2.5 | 45 |
| 0 | 0 | 1 | 0 | 1 | 0 | 49 | 2.5 | 45 |
| 0 | 0 | 1 | 0 | 1 | 0 | 50 | 2.5 | 45 |
| 0 | 0 | 1 | 0 | 1 | 0 | 51 | 2.5 | 45 |
| 0 | 0 | 1 | 0 | 1 | 0 | 52 | 2.5 | 45 |
| 0 | 0 | 1 | 0 | 1 | 0 | 53 | 2.5 | 45 |
| 0 | 0 | 1 | 0 | 1 | 0 | 54 | 2.5 | 45 |
| 0 | 0 | 1 | 0 | 1 | 0 | 55 | 2.5 | 45 |

|   |   |   |   |   |   |     |     |     |
|---|---|---|---|---|---|-----|-----|-----|
| 0 | 0 | 1 | 0 | 1 | 0 | 56  | 2.5 | 45  |
| 0 | 0 | 1 | 0 | 1 | 0 | 57  | 2.5 | 45  |
| 0 | 0 | 1 | 0 | 1 | 0 | 58  | 2.5 | 45  |
| 0 | 0 | 1 | 0 | 1 | 0 | 59  | 2.5 | 45  |
| 0 | 0 | 1 | 0 | 1 | 0 | 91  | 2.5 | 105 |
| 0 | 0 | 1 | 0 | 1 | 0 | 92  | 2.5 | 105 |
| 0 | 0 | 1 | 0 | 1 | 0 | 93  | 2.5 | 105 |
| 0 | 0 | 1 | 0 | 1 | 0 | 94  | 2.5 | 105 |
| 0 | 0 | 1 | 0 | 1 | 0 | 95  | 2.5 | 105 |
| 0 | 0 | 1 | 0 | 1 | 0 | 96  | 2.5 | 105 |
| 0 | 0 | 1 | 0 | 1 | 0 | 97  | 2.5 | 105 |
| 0 | 0 | 1 | 0 | 1 | 0 | 98  | 2.5 | 105 |
| 0 | 0 | 1 | 0 | 1 | 0 | 99  | 2.5 | 105 |
| 0 | 0 | 1 | 0 | 1 | 0 | 100 | 2.5 | 105 |
| 0 | 0 | 1 | 0 | 1 | 0 | 101 | 2.5 | 105 |
| 0 | 0 | 1 | 0 | 1 | 0 | 102 | 2.5 | 105 |
| 0 | 0 | 1 | 0 | 1 | 0 | 103 | 2.5 | 105 |
| 0 | 0 | 1 | 0 | 1 | 0 | 104 | 2.5 | 105 |
| 0 | 0 | 1 | 0 | 1 | 0 | 105 | 2.5 | 105 |
| 0 | 0 | 1 | 0 | 1 | 0 | 106 | 2.5 | 105 |
| 0 | 0 | 1 | 0 | 1 | 0 | 107 | 2.5 | 105 |
| 0 | 0 | 1 | 0 | 1 | 0 | 108 | 2.5 | 105 |
| 0 | 0 | 1 | 0 | 1 | 0 | 109 | 2.5 | 105 |
| 0 | 0 | 1 | 0 | 1 | 0 | 110 | 2.5 | 105 |
| 0 | 0 | 1 | 0 | 1 | 0 | 111 | 2.5 | 105 |
| 0 | 0 | 1 | 0 | 1 | 0 | 112 | 2.5 | 105 |
| 0 | 0 | 1 | 0 | 1 | 0 | 113 | 2.5 | 105 |
| 0 | 0 | 1 | 0 | 1 | 0 | 114 | 2.5 | 105 |
| 0 | 0 | 1 | 0 | 1 | 0 | 115 | 2.5 | 105 |
| 0 | 0 | 1 | 0 | 1 | 0 | 116 | 2.5 | 105 |
| 0 | 0 | 1 | 0 | 1 | 0 | 117 | 2.5 | 105 |
| 0 | 0 | 1 | 0 | 1 | 0 | 118 | 2.5 | 105 |
| 0 | 0 | 1 | 0 | 1 | 0 | 119 | 2.5 | 105 |
| 0 | 0 | 1 | 0 | 1 | 0 | 151 | 2.5 | 165 |
| 0 | 0 | 1 | 0 | 1 | 0 | 152 | 2.5 | 165 |
| 0 | 0 | 1 | 0 | 1 | 0 | 153 | 2.5 | 165 |
| 0 | 0 | 1 | 0 | 1 | 0 | 154 | 2.5 | 165 |
| 0 | 0 | 1 | 0 | 1 | 0 | 155 | 2.5 | 165 |
| 0 | 0 | 1 | 0 | 1 | 0 | 156 | 2.5 | 165 |
| 0 | 0 | 1 | 0 | 1 | 0 | 157 | 2.5 | 165 |
| 0 | 0 | 1 | 0 | 1 | 0 | 158 | 2.5 | 165 |
| 0 | 0 | 1 | 0 | 1 | 0 | 159 | 2.5 | 165 |
| 0 | 0 | 1 | 0 | 1 | 0 | 160 | 2.5 | 165 |
| 0 | 0 | 1 | 0 | 1 | 0 | 161 | 2.5 | 165 |
| 0 | 0 | 1 | 0 | 1 | 0 | 162 | 2.5 | 165 |
| 0 | 0 | 1 | 0 | 1 | 0 | 163 | 2.5 | 165 |
| 0 | 0 | 1 | 0 | 1 | 0 | 164 | 2.5 | 165 |

|   |   |   |   |   |   |     |     |     |
|---|---|---|---|---|---|-----|-----|-----|
| 0 | 0 | 1 | 0 | 1 | 0 | 165 | 2.5 | 165 |
| 0 | 0 | 1 | 0 | 1 | 0 | 166 | 2.5 | 165 |
| 0 | 0 | 1 | 0 | 1 | 0 | 167 | 2.5 | 165 |
| 0 | 0 | 1 | 0 | 1 | 0 | 168 | 2.5 | 165 |
| 0 | 0 | 1 | 0 | 1 | 0 | 169 | 2.5 | 165 |
| 0 | 0 | 1 | 0 | 1 | 0 | 170 | 2.5 | 165 |
| 0 | 0 | 1 | 0 | 1 | 0 | 171 | 2.5 | 165 |
| 0 | 0 | 1 | 0 | 1 | 0 | 172 | 2.5 | 165 |
| 0 | 0 | 1 | 0 | 1 | 0 | 173 | 2.5 | 165 |
| 0 | 0 | 1 | 0 | 1 | 0 | 174 | 2.5 | 165 |
| 0 | 0 | 1 | 0 | 1 | 0 | 175 | 2.5 | 165 |
| 0 | 0 | 1 | 0 | 1 | 0 | 176 | 2.5 | 165 |
| 0 | 0 | 1 | 0 | 1 | 0 | 177 | 2.5 | 165 |
| 0 | 0 | 1 | 0 | 1 | 0 | 178 | 2.5 | 165 |
| 0 | 0 | 1 | 0 | 1 | 0 | 179 | 2.5 | 165 |
| 0 | 0 | 1 | 0 | 1 | 0 | 180 | 2.5 | 180 |
| 0 | 0 | 1 | 0 | 0 | 1 | 0   | 2.5 | 0   |
| 0 | 0 | 1 | 0 | 0 | 1 | 1   | 2.5 | 15  |
| 0 | 0 | 1 | 0 | 0 | 1 | 2   | 2.5 | 15  |
| 0 | 0 | 1 | 0 | 0 | 1 | 3   | 2.5 | 15  |
| 0 | 0 | 1 | 0 | 0 | 1 | 4   | 2.5 | 15  |
| 0 | 0 | 1 | 0 | 0 | 1 | 5   | 2.5 | 15  |
| 0 | 0 | 1 | 0 | 0 | 1 | 6   | 2.5 | 15  |
| 0 | 0 | 1 | 0 | 0 | 1 | 7   | 2.5 | 15  |
| 0 | 0 | 1 | 0 | 0 | 1 | 8   | 2.5 | 15  |
| 0 | 0 | 1 | 0 | 0 | 1 | 9   | 2.5 | 15  |
| 0 | 0 | 1 | 0 | 0 | 1 | 10  | 2.5 | 15  |
| 0 | 0 | 1 | 0 | 0 | 1 | 11  | 2.5 | 15  |
| 0 | 0 | 1 | 0 | 0 | 1 | 12  | 2.5 | 15  |
| 0 | 0 | 1 | 0 | 0 | 1 | 13  | 2.5 | 15  |
| 0 | 0 | 1 | 0 | 0 | 1 | 14  | 2.5 | 15  |
| 0 | 0 | 1 | 0 | 0 | 1 | 15  | 2.5 | 15  |
| 0 | 0 | 1 | 0 | 0 | 1 | 16  | 2.5 | 15  |
| 0 | 0 | 1 | 0 | 0 | 1 | 17  | 2.5 | 15  |
| 0 | 0 | 1 | 0 | 0 | 1 | 18  | 2.5 | 15  |
| 0 | 0 | 1 | 0 | 0 | 1 | 19  | 2.5 | 15  |
| 0 | 0 | 1 | 0 | 0 | 1 | 20  | 2.5 | 15  |
| 0 | 0 | 1 | 0 | 0 | 1 | 21  | 2.5 | 15  |
| 0 | 0 | 1 | 0 | 0 | 1 | 22  | 2.5 | 15  |
| 0 | 0 | 1 | 0 | 0 | 1 | 23  | 2.5 | 15  |
| 0 | 0 | 1 | 0 | 0 | 1 | 24  | 2.5 | 15  |
| 0 | 0 | 1 | 0 | 0 | 1 | 25  | 2.5 | 15  |
| 0 | 0 | 1 | 0 | 0 | 1 | 26  | 2.5 | 15  |
| 0 | 0 | 1 | 0 | 0 | 1 | 27  | 2.5 | 15  |
| 0 | 0 | 1 | 0 | 0 | 1 | 28  | 2.5 | 15  |
| 0 | 0 | 1 | 0 | 0 | 1 | 29  | 2.5 | 15  |

|   |   |   |   |   |   |     |     |     |
|---|---|---|---|---|---|-----|-----|-----|
| 0 | 0 | 1 | 0 | 0 | 1 | 30  | 2.5 | 30  |
| 0 | 0 | 1 | 0 | 0 | 1 | 31  | 2.5 | 45  |
| 0 | 0 | 1 | 0 | 0 | 1 | 32  | 2.5 | 45  |
| 0 | 0 | 1 | 0 | 0 | 1 | 33  | 2.5 | 45  |
| 0 | 0 | 1 | 0 | 0 | 1 | 34  | 2.5 | 45  |
| 0 | 0 | 1 | 0 | 0 | 1 | 35  | 2.5 | 45  |
| 0 | 0 | 1 | 0 | 0 | 1 | 36  | 2.5 | 45  |
| 0 | 0 | 1 | 0 | 0 | 1 | 37  | 2.5 | 45  |
| 0 | 0 | 1 | 0 | 0 | 1 | 38  | 2.5 | 45  |
| 0 | 0 | 1 | 0 | 0 | 1 | 39  | 2.5 | 45  |
| 0 | 0 | 1 | 0 | 0 | 1 | 40  | 2.5 | 45  |
| 0 | 0 | 1 | 0 | 0 | 1 | 41  | 2.5 | 45  |
| 0 | 0 | 1 | 0 | 0 | 1 | 42  | 2.5 | 45  |
| 0 | 0 | 1 | 0 | 0 | 1 | 43  | 2.5 | 45  |
| 0 | 0 | 1 | 0 | 0 | 1 | 44  | 2.5 | 45  |
| 0 | 0 | 1 | 0 | 0 | 1 | 45  | 2.5 | 45  |
| 0 | 0 | 1 | 0 | 0 | 1 | 46  | 2.5 | 45  |
| 0 | 0 | 1 | 0 | 0 | 1 | 47  | 2.5 | 45  |
| 0 | 0 | 1 | 0 | 0 | 1 | 48  | 2.5 | 45  |
| 0 | 0 | 1 | 0 | 0 | 1 | 49  | 2.5 | 45  |
| 0 | 0 | 1 | 0 | 0 | 1 | 50  | 2.5 | 45  |
| 0 | 0 | 1 | 0 | 0 | 1 | 51  | 2.5 | 45  |
| 0 | 0 | 1 | 0 | 0 | 1 | 52  | 2.5 | 45  |
| 0 | 0 | 1 | 0 | 0 | 1 | 53  | 2.5 | 45  |
| 0 | 0 | 1 | 0 | 0 | 1 | 54  | 2.5 | 45  |
| 0 | 0 | 1 | 0 | 0 | 1 | 55  | 2.5 | 45  |
| 0 | 0 | 1 | 0 | 0 | 1 | 56  | 2.5 | 45  |
| 0 | 0 | 1 | 0 | 0 | 1 | 57  | 2.5 | 45  |
| 0 | 0 | 1 | 0 | 0 | 1 | 58  | 2.5 | 45  |
| 0 | 0 | 1 | 0 | 0 | 1 | 59  | 2.5 | 45  |
| 0 | 0 | 1 | 0 | 0 | 1 | 91  | 2.5 | 105 |
| 0 | 0 | 1 | 0 | 0 | 1 | 92  | 2.5 | 105 |
| 0 | 0 | 1 | 0 | 0 | 1 | 93  | 2.5 | 105 |
| 0 | 0 | 1 | 0 | 0 | 1 | 94  | 2.5 | 105 |
| 0 | 0 | 1 | 0 | 0 | 1 | 95  | 2.5 | 105 |
| 0 | 0 | 1 | 0 | 0 | 1 | 96  | 2.5 | 105 |
| 0 | 0 | 1 | 0 | 0 | 1 | 97  | 2.5 | 105 |
| 0 | 0 | 1 | 0 | 0 | 1 | 98  | 2.5 | 105 |
| 0 | 0 | 1 | 0 | 0 | 1 | 99  | 2.5 | 105 |
| 0 | 0 | 1 | 0 | 0 | 1 | 100 | 2.5 | 105 |
| 0 | 0 | 1 | 0 | 0 | 1 | 101 | 2.5 | 105 |
| 0 | 0 | 1 | 0 | 0 | 1 | 102 | 2.5 | 105 |
| 0 | 0 | 1 | 0 | 0 | 1 | 103 | 2.5 | 105 |
| 0 | 0 | 1 | 0 | 0 | 1 | 104 | 2.5 | 105 |
| 0 | 0 | 1 | 0 | 0 | 1 | 105 | 2.5 | 105 |
| 0 | 0 | 1 | 0 | 0 | 1 | 106 | 2.5 | 105 |

|   |   |   |   |   |   |     |     |     |
|---|---|---|---|---|---|-----|-----|-----|
| 0 | 0 | 1 | 0 | 0 | 1 | 107 | 2.5 | 105 |
| 0 | 0 | 1 | 0 | 0 | 1 | 108 | 2.5 | 105 |
| 0 | 0 | 1 | 0 | 0 | 1 | 109 | 2.5 | 105 |
| 0 | 0 | 1 | 0 | 0 | 1 | 110 | 2.5 | 105 |
| 0 | 0 | 1 | 0 | 0 | 1 | 111 | 2.5 | 105 |
| 0 | 0 | 1 | 0 | 0 | 1 | 112 | 2.5 | 105 |
| 0 | 0 | 1 | 0 | 0 | 1 | 113 | 2.5 | 105 |
| 0 | 0 | 1 | 0 | 0 | 1 | 114 | 2.5 | 105 |
| 0 | 0 | 1 | 0 | 0 | 1 | 115 | 2.5 | 105 |
| 0 | 0 | 1 | 0 | 0 | 1 | 116 | 2.5 | 105 |
| 0 | 0 | 1 | 0 | 0 | 1 | 117 | 2.5 | 105 |
| 0 | 0 | 1 | 0 | 0 | 1 | 118 | 2.5 | 105 |
| 0 | 0 | 1 | 0 | 0 | 1 | 119 | 2.5 | 105 |
| 0 | 0 | 1 | 0 | 0 | 1 | 120 | 2.5 | 120 |
| 0 | 0 | 1 | 0 | 0 | 1 | 121 | 2.5 | 135 |
| 0 | 0 | 1 | 0 | 0 | 1 | 122 | 2.5 | 135 |
| 0 | 0 | 1 | 0 | 0 | 1 | 123 | 2.5 | 135 |
| 0 | 0 | 1 | 0 | 0 | 1 | 124 | 2.5 | 135 |
| 0 | 0 | 1 | 0 | 0 | 1 | 125 | 2.5 | 135 |
| 0 | 0 | 1 | 0 | 0 | 1 | 126 | 2.5 | 135 |
| 0 | 0 | 1 | 0 | 0 | 1 | 127 | 2.5 | 135 |
| 0 | 0 | 1 | 0 | 0 | 1 | 128 | 2.5 | 135 |
| 0 | 0 | 1 | 0 | 0 | 1 | 129 | 2.5 | 135 |
| 0 | 0 | 1 | 0 | 0 | 1 | 130 | 2.5 | 135 |
| 0 | 0 | 1 | 0 | 0 | 1 | 131 | 2.5 | 135 |
| 0 | 0 | 1 | 0 | 0 | 1 | 132 | 2.5 | 135 |
| 0 | 0 | 1 | 0 | 0 | 1 | 133 | 2.5 | 135 |
| 0 | 0 | 1 | 0 | 0 | 1 | 134 | 2.5 | 135 |
| 0 | 0 | 1 | 0 | 0 | 1 | 135 | 2.5 | 135 |
| 0 | 0 | 1 | 0 | 0 | 1 | 136 | 2.5 | 135 |
| 0 | 0 | 1 | 0 | 0 | 1 | 137 | 2.5 | 135 |
| 0 | 0 | 1 | 0 | 0 | 1 | 138 | 2.5 | 135 |
| 0 | 0 | 1 | 0 | 0 | 1 | 139 | 2.5 | 135 |
| 0 | 0 | 1 | 0 | 0 | 1 | 140 | 2.5 | 135 |
| 0 | 0 | 1 | 0 | 0 | 1 | 141 | 2.5 | 135 |
| 0 | 0 | 1 | 0 | 0 | 1 | 142 | 2.5 | 135 |
| 0 | 0 | 1 | 0 | 0 | 1 | 143 | 2.5 | 135 |
| 0 | 0 | 1 | 0 | 0 | 1 | 144 | 2.5 | 135 |
| 0 | 0 | 1 | 0 | 0 | 1 | 145 | 2.5 | 135 |
| 0 | 0 | 1 | 0 | 0 | 1 | 146 | 2.5 | 135 |
| 0 | 0 | 1 | 0 | 0 | 1 | 147 | 2.5 | 135 |
| 0 | 0 | 1 | 0 | 0 | 1 | 148 | 2.5 | 135 |
| 0 | 0 | 1 | 0 | 0 | 1 | 149 | 2.5 | 135 |
| 0 | 0 | 0 | 1 | 1 | 0 | 0   | 2.5 | 0   |
| 0 | 0 | 0 | 1 | 1 | 0 | 1   | 2.5 | 15  |
| 0 | 0 | 0 | 1 | 1 | 0 | 2   | 2.5 | 15  |

|   |   |   |   |   |   |    |     |    |
|---|---|---|---|---|---|----|-----|----|
| 0 | 0 | 0 | 1 | 1 | 0 | 3  | 2.5 | 15 |
| 0 | 0 | 0 | 1 | 1 | 0 | 4  | 2.5 | 15 |
| 0 | 0 | 0 | 1 | 1 | 0 | 5  | 2.5 | 15 |
| 0 | 0 | 0 | 1 | 1 | 0 | 6  | 2.5 | 15 |
| 0 | 0 | 0 | 1 | 1 | 0 | 7  | 2.5 | 15 |
| 0 | 0 | 0 | 1 | 1 | 0 | 8  | 2.5 | 15 |
| 0 | 0 | 0 | 1 | 1 | 0 | 9  | 2.5 | 15 |
| 0 | 0 | 0 | 1 | 1 | 0 | 10 | 2.5 | 15 |
| 0 | 0 | 0 | 1 | 1 | 0 | 11 | 2.5 | 15 |
| 0 | 0 | 0 | 1 | 1 | 0 | 12 | 2.5 | 15 |
| 0 | 0 | 0 | 1 | 1 | 0 | 13 | 2.5 | 15 |
| 0 | 0 | 0 | 1 | 1 | 0 | 14 | 2.5 | 15 |
| 0 | 0 | 0 | 1 | 1 | 0 | 15 | 2.5 | 15 |
| 0 | 0 | 0 | 1 | 1 | 0 | 16 | 2.5 | 15 |
| 0 | 0 | 0 | 1 | 1 | 0 | 17 | 2.5 | 15 |
| 0 | 0 | 0 | 1 | 1 | 0 | 18 | 2.5 | 15 |
| 0 | 0 | 0 | 1 | 1 | 0 | 19 | 2.5 | 15 |
| 0 | 0 | 0 | 1 | 1 | 0 | 20 | 2.5 | 15 |
| 0 | 0 | 0 | 1 | 1 | 0 | 21 | 2.5 | 15 |
| 0 | 0 | 0 | 1 | 1 | 0 | 22 | 2.5 | 15 |
| 0 | 0 | 0 | 1 | 1 | 0 | 23 | 2.5 | 15 |
| 0 | 0 | 0 | 1 | 1 | 0 | 24 | 2.5 | 15 |
| 0 | 0 | 0 | 1 | 1 | 0 | 25 | 2.5 | 15 |
| 0 | 0 | 0 | 1 | 1 | 0 | 26 | 2.5 | 15 |
| 0 | 0 | 0 | 1 | 1 | 0 | 27 | 2.5 | 15 |
| 0 | 0 | 0 | 1 | 1 | 0 | 28 | 2.5 | 15 |
| 0 | 0 | 0 | 1 | 1 | 0 | 29 | 2.5 | 15 |
| 0 | 0 | 0 | 1 | 1 | 0 | 30 | 2.5 | 30 |
| 0 | 0 | 0 | 1 | 1 | 0 | 31 | 2.5 | 45 |
| 0 | 0 | 0 | 1 | 1 | 0 | 32 | 2.5 | 45 |
| 0 | 0 | 0 | 1 | 1 | 0 | 33 | 2.5 | 45 |
| 0 | 0 | 0 | 1 | 1 | 0 | 34 | 2.5 | 45 |
| 0 | 0 | 0 | 1 | 1 | 0 | 35 | 2.5 | 45 |
| 0 | 0 | 0 | 1 | 1 | 0 | 36 | 2.5 | 45 |
| 0 | 0 | 0 | 1 | 1 | 0 | 37 | 2.5 | 45 |
| 0 | 0 | 0 | 1 | 1 | 0 | 38 | 2.5 | 45 |
| 0 | 0 | 0 | 1 | 1 | 0 | 39 | 2.5 | 45 |
| 0 | 0 | 0 | 1 | 1 | 0 | 40 | 2.5 | 45 |
| 0 | 0 | 0 | 1 | 1 | 0 | 41 | 2.5 | 45 |
| 0 | 0 | 0 | 1 | 1 | 0 | 42 | 2.5 | 45 |
| 0 | 0 | 0 | 1 | 1 | 0 | 43 | 2.5 | 45 |
| 0 | 0 | 0 | 1 | 1 | 0 | 44 | 2.5 | 45 |
| 0 | 0 | 0 | 1 | 1 | 0 | 45 | 2.5 | 45 |
| 0 | 0 | 0 | 1 | 1 | 0 | 46 | 2.5 | 45 |
| 0 | 0 | 0 | 1 | 1 | 0 | 47 | 2.5 | 45 |
| 0 | 0 | 0 | 1 | 1 | 0 | 48 | 2.5 | 45 |

|   |   |   |   |   |   |     |     |     |
|---|---|---|---|---|---|-----|-----|-----|
| 0 | 0 | 0 | 1 | 1 | 0 | 49  | 2.5 | 45  |
| 0 | 0 | 0 | 1 | 1 | 0 | 50  | 2.5 | 45  |
| 0 | 0 | 0 | 1 | 1 | 0 | 51  | 2.5 | 45  |
| 0 | 0 | 0 | 1 | 1 | 0 | 52  | 2.5 | 45  |
| 0 | 0 | 0 | 1 | 1 | 0 | 53  | 2.5 | 45  |
| 0 | 0 | 0 | 1 | 1 | 0 | 54  | 2.5 | 45  |
| 0 | 0 | 0 | 1 | 1 | 0 | 55  | 2.5 | 45  |
| 0 | 0 | 0 | 1 | 1 | 0 | 56  | 2.5 | 45  |
| 0 | 0 | 0 | 1 | 1 | 0 | 57  | 2.5 | 45  |
| 0 | 0 | 0 | 1 | 1 | 0 | 58  | 2.5 | 45  |
| 0 | 0 | 0 | 1 | 1 | 0 | 59  | 2.5 | 45  |
| 0 | 0 | 0 | 1 | 1 | 0 | 60  | 2.5 | 60  |
| 0 | 0 | 0 | 1 | 1 | 0 | 61  | 2.5 | 75  |
| 0 | 0 | 0 | 1 | 1 | 0 | 62  | 2.5 | 75  |
| 0 | 0 | 0 | 1 | 1 | 0 | 63  | 2.5 | 75  |
| 0 | 0 | 0 | 1 | 1 | 0 | 64  | 2.5 | 75  |
| 0 | 0 | 0 | 1 | 1 | 0 | 65  | 2.5 | 75  |
| 0 | 0 | 0 | 1 | 1 | 0 | 66  | 2.5 | 75  |
| 0 | 0 | 0 | 1 | 1 | 0 | 67  | 2.5 | 75  |
| 0 | 0 | 0 | 1 | 1 | 0 | 68  | 2.5 | 75  |
| 0 | 0 | 0 | 1 | 1 | 0 | 69  | 2.5 | 75  |
| 0 | 0 | 0 | 1 | 1 | 0 | 70  | 2.5 | 75  |
| 0 | 0 | 0 | 1 | 1 | 0 | 71  | 2.5 | 75  |
| 0 | 0 | 0 | 1 | 1 | 0 | 72  | 2.5 | 75  |
| 0 | 0 | 0 | 1 | 1 | 0 | 73  | 2.5 | 75  |
| 0 | 0 | 0 | 1 | 1 | 0 | 74  | 2.5 | 75  |
| 0 | 0 | 0 | 1 | 1 | 0 | 75  | 2.5 | 75  |
| 0 | 0 | 0 | 1 | 1 | 0 | 76  | 2.5 | 75  |
| 0 | 0 | 0 | 1 | 1 | 0 | 77  | 2.5 | 75  |
| 0 | 0 | 0 | 1 | 1 | 0 | 78  | 2.5 | 75  |
| 0 | 0 | 0 | 1 | 1 | 0 | 79  | 2.5 | 75  |
| 0 | 0 | 0 | 1 | 1 | 0 | 80  | 2.5 | 75  |
| 0 | 0 | 0 | 1 | 1 | 0 | 81  | 2.5 | 75  |
| 0 | 0 | 0 | 1 | 1 | 0 | 82  | 2.5 | 75  |
| 0 | 0 | 0 | 1 | 1 | 0 | 83  | 2.5 | 75  |
| 0 | 0 | 0 | 1 | 1 | 0 | 84  | 2.5 | 75  |
| 0 | 0 | 0 | 1 | 1 | 0 | 85  | 2.5 | 75  |
| 0 | 0 | 0 | 1 | 1 | 0 | 86  | 2.5 | 75  |
| 0 | 0 | 0 | 1 | 1 | 0 | 87  | 2.5 | 75  |
| 0 | 0 | 0 | 1 | 1 | 0 | 88  | 2.5 | 75  |
| 0 | 0 | 0 | 1 | 1 | 0 | 89  | 2.5 | 75  |
| 0 | 0 | 0 | 1 | 1 | 0 | 151 | 2.5 | 165 |
| 0 | 0 | 0 | 1 | 1 | 0 | 152 | 2.5 | 165 |
| 0 | 0 | 0 | 1 | 1 | 0 | 153 | 2.5 | 165 |
| 0 | 0 | 0 | 1 | 1 | 0 | 154 | 2.5 | 165 |
| 0 | 0 | 0 | 1 | 1 | 0 | 155 | 2.5 | 165 |

|   |   |   |   |   |   |     |     |     |
|---|---|---|---|---|---|-----|-----|-----|
| 0 | 0 | 0 | 1 | 1 | 0 | 156 | 2.5 | 165 |
| 0 | 0 | 0 | 1 | 1 | 0 | 157 | 2.5 | 165 |
| 0 | 0 | 0 | 1 | 1 | 0 | 158 | 2.5 | 165 |
| 0 | 0 | 0 | 1 | 1 | 0 | 159 | 2.5 | 165 |
| 0 | 0 | 0 | 1 | 1 | 0 | 160 | 2.5 | 165 |
| 0 | 0 | 0 | 1 | 1 | 0 | 161 | 2.5 | 165 |
| 0 | 0 | 0 | 1 | 1 | 0 | 162 | 2.5 | 165 |
| 0 | 0 | 0 | 1 | 1 | 0 | 163 | 2.5 | 165 |
| 0 | 0 | 0 | 1 | 1 | 0 | 164 | 2.5 | 165 |
| 0 | 0 | 0 | 1 | 1 | 0 | 165 | 2.5 | 165 |
| 0 | 0 | 0 | 1 | 1 | 0 | 166 | 2.5 | 165 |
| 0 | 0 | 0 | 1 | 1 | 0 | 167 | 2.5 | 165 |
| 0 | 0 | 0 | 1 | 1 | 0 | 168 | 2.5 | 165 |
| 0 | 0 | 0 | 1 | 1 | 0 | 169 | 2.5 | 165 |
| 0 | 0 | 0 | 1 | 1 | 0 | 170 | 2.5 | 165 |
| 0 | 0 | 0 | 1 | 1 | 0 | 171 | 2.5 | 165 |
| 0 | 0 | 0 | 1 | 1 | 0 | 172 | 2.5 | 165 |
| 0 | 0 | 0 | 1 | 1 | 0 | 173 | 2.5 | 165 |
| 0 | 0 | 0 | 1 | 1 | 0 | 174 | 2.5 | 165 |
| 0 | 0 | 0 | 1 | 1 | 0 | 175 | 2.5 | 165 |
| 0 | 0 | 0 | 1 | 1 | 0 | 176 | 2.5 | 165 |
| 0 | 0 | 0 | 1 | 1 | 0 | 177 | 2.5 | 165 |
| 0 | 0 | 0 | 1 | 1 | 0 | 178 | 2.5 | 165 |
| 0 | 0 | 0 | 1 | 1 | 0 | 179 | 2.5 | 165 |
| 0 | 0 | 0 | 1 | 1 | 0 | 180 | 2.5 | 180 |
| 0 | 0 | 0 | 1 | 0 | 1 | 0   | 2.5 | 0   |
| 0 | 0 | 0 | 1 | 0 | 1 | 1   | 2.5 | 15  |
| 0 | 0 | 0 | 1 | 0 | 1 | 2   | 2.5 | 15  |
| 0 | 0 | 0 | 1 | 0 | 1 | 3   | 2.5 | 15  |
| 0 | 0 | 0 | 1 | 0 | 1 | 4   | 2.5 | 15  |
| 0 | 0 | 0 | 1 | 0 | 1 | 5   | 2.5 | 15  |
| 0 | 0 | 0 | 1 | 0 | 1 | 6   | 2.5 | 15  |
| 0 | 0 | 0 | 1 | 0 | 1 | 7   | 2.5 | 15  |
| 0 | 0 | 0 | 1 | 0 | 1 | 8   | 2.5 | 15  |
| 0 | 0 | 0 | 1 | 0 | 1 | 9   | 2.5 | 15  |
| 0 | 0 | 0 | 1 | 0 | 1 | 10  | 2.5 | 15  |
| 0 | 0 | 0 | 1 | 0 | 1 | 11  | 2.5 | 15  |
| 0 | 0 | 0 | 1 | 0 | 1 | 12  | 2.5 | 15  |
| 0 | 0 | 0 | 1 | 0 | 1 | 13  | 2.5 | 15  |
| 0 | 0 | 0 | 1 | 0 | 1 | 14  | 2.5 | 15  |
| 0 | 0 | 0 | 1 | 0 | 1 | 15  | 2.5 | 15  |
| 0 | 0 | 0 | 1 | 0 | 1 | 16  | 2.5 | 15  |
| 0 | 0 | 0 | 1 | 0 | 1 | 17  | 2.5 | 15  |
| 0 | 0 | 0 | 1 | 0 | 1 | 18  | 2.5 | 15  |
| 0 | 0 | 0 | 1 | 0 | 1 | 19  | 2.5 | 15  |
| 0 | 0 | 0 | 1 | 0 | 1 | 20  | 2.5 | 15  |

|   |   |   |   |   |   |    |     |    |
|---|---|---|---|---|---|----|-----|----|
| 0 | 0 | 0 | 1 | 0 | 1 | 21 | 2.5 | 15 |
| 0 | 0 | 0 | 1 | 0 | 1 | 22 | 2.5 | 15 |
| 0 | 0 | 0 | 1 | 0 | 1 | 23 | 2.5 | 15 |
| 0 | 0 | 0 | 1 | 0 | 1 | 24 | 2.5 | 15 |
| 0 | 0 | 0 | 1 | 0 | 1 | 25 | 2.5 | 15 |
| 0 | 0 | 0 | 1 | 0 | 1 | 26 | 2.5 | 15 |
| 0 | 0 | 0 | 1 | 0 | 1 | 27 | 2.5 | 15 |
| 0 | 0 | 0 | 1 | 0 | 1 | 28 | 2.5 | 15 |
| 0 | 0 | 0 | 1 | 0 | 1 | 29 | 2.5 | 15 |
| 0 | 0 | 0 | 1 | 0 | 1 | 30 | 2.5 | 30 |
| 0 | 0 | 0 | 1 | 0 | 1 | 31 | 2.5 | 45 |
| 0 | 0 | 0 | 1 | 0 | 1 | 32 | 2.5 | 45 |
| 0 | 0 | 0 | 1 | 0 | 1 | 33 | 2.5 | 45 |
| 0 | 0 | 0 | 1 | 0 | 1 | 34 | 2.5 | 45 |
| 0 | 0 | 0 | 1 | 0 | 1 | 35 | 2.5 | 45 |
| 0 | 0 | 0 | 1 | 0 | 1 | 36 | 2.5 | 45 |
| 0 | 0 | 0 | 1 | 0 | 1 | 37 | 2.5 | 45 |
| 0 | 0 | 0 | 1 | 0 | 1 | 38 | 2.5 | 45 |
| 0 | 0 | 0 | 1 | 0 | 1 | 39 | 2.5 | 45 |
| 0 | 0 | 0 | 1 | 0 | 1 | 40 | 2.5 | 45 |
| 0 | 0 | 0 | 1 | 0 | 1 | 41 | 2.5 | 45 |
| 0 | 0 | 0 | 1 | 0 | 1 | 42 | 2.5 | 45 |
| 0 | 0 | 0 | 1 | 0 | 1 | 43 | 2.5 | 45 |
| 0 | 0 | 0 | 1 | 0 | 1 | 44 | 2.5 | 45 |
| 0 | 0 | 0 | 1 | 0 | 1 | 45 | 2.5 | 45 |
| 0 | 0 | 0 | 1 | 0 | 1 | 46 | 2.5 | 45 |
| 0 | 0 | 0 | 1 | 0 | 1 | 47 | 2.5 | 45 |
| 0 | 0 | 0 | 1 | 0 | 1 | 48 | 2.5 | 45 |
| 0 | 0 | 0 | 1 | 0 | 1 | 49 | 2.5 | 45 |
| 0 | 0 | 0 | 1 | 0 | 1 | 50 | 2.5 | 45 |
| 0 | 0 | 0 | 1 | 0 | 1 | 51 | 2.5 | 45 |
| 0 | 0 | 0 | 1 | 0 | 1 | 52 | 2.5 | 45 |
| 0 | 0 | 0 | 1 | 0 | 1 | 53 | 2.5 | 45 |
| 0 | 0 | 0 | 1 | 0 | 1 | 54 | 2.5 | 45 |
| 0 | 0 | 0 | 1 | 0 | 1 | 55 | 2.5 | 45 |
| 0 | 0 | 0 | 1 | 0 | 1 | 56 | 2.5 | 45 |
| 0 | 0 | 0 | 1 | 0 | 1 | 57 | 2.5 | 45 |
| 0 | 0 | 0 | 1 | 0 | 1 | 58 | 2.5 | 45 |
| 0 | 0 | 0 | 1 | 0 | 1 | 59 | 2.5 | 45 |
| 0 | 0 | 0 | 1 | 0 | 1 | 60 | 2.5 | 60 |
| 0 | 0 | 0 | 1 | 0 | 1 | 61 | 2.5 | 75 |
| 0 | 0 | 0 | 1 | 0 | 1 | 62 | 2.5 | 75 |
| 0 | 0 | 0 | 1 | 0 | 1 | 63 | 2.5 | 75 |
| 0 | 0 | 0 | 1 | 0 | 1 | 64 | 2.5 | 75 |
| 0 | 0 | 0 | 1 | 0 | 1 | 65 | 2.5 | 75 |
| 0 | 0 | 0 | 1 | 0 | 1 | 66 | 2.5 | 75 |

|   |   |   |   |   |   |     |     |     |
|---|---|---|---|---|---|-----|-----|-----|
| 0 | 0 | 0 | 1 | 0 | 1 | 67  | 2.5 | 75  |
| 0 | 0 | 0 | 1 | 0 | 1 | 68  | 2.5 | 75  |
| 0 | 0 | 0 | 1 | 0 | 1 | 69  | 2.5 | 75  |
| 0 | 0 | 0 | 1 | 0 | 1 | 70  | 2.5 | 75  |
| 0 | 0 | 0 | 1 | 0 | 1 | 71  | 2.5 | 75  |
| 0 | 0 | 0 | 1 | 0 | 1 | 72  | 2.5 | 75  |
| 0 | 0 | 0 | 1 | 0 | 1 | 73  | 2.5 | 75  |
| 0 | 0 | 0 | 1 | 0 | 1 | 74  | 2.5 | 75  |
| 0 | 0 | 0 | 1 | 0 | 1 | 75  | 2.5 | 75  |
| 0 | 0 | 0 | 1 | 0 | 1 | 76  | 2.5 | 75  |
| 0 | 0 | 0 | 1 | 0 | 1 | 77  | 2.5 | 75  |
| 0 | 0 | 0 | 1 | 0 | 1 | 78  | 2.5 | 75  |
| 0 | 0 | 0 | 1 | 0 | 1 | 79  | 2.5 | 75  |
| 0 | 0 | 0 | 1 | 0 | 1 | 80  | 2.5 | 75  |
| 0 | 0 | 0 | 1 | 0 | 1 | 81  | 2.5 | 75  |
| 0 | 0 | 0 | 1 | 0 | 1 | 82  | 2.5 | 75  |
| 0 | 0 | 0 | 1 | 0 | 1 | 83  | 2.5 | 75  |
| 0 | 0 | 0 | 1 | 0 | 1 | 84  | 2.5 | 75  |
| 0 | 0 | 0 | 1 | 0 | 1 | 85  | 2.5 | 75  |
| 0 | 0 | 0 | 1 | 0 | 1 | 86  | 2.5 | 75  |
| 0 | 0 | 0 | 1 | 0 | 1 | 87  | 2.5 | 75  |
| 0 | 0 | 0 | 1 | 0 | 1 | 88  | 2.5 | 75  |
| 0 | 0 | 0 | 1 | 0 | 1 | 89  | 2.5 | 75  |
| 0 | 0 | 0 | 1 | 0 | 1 | 121 | 2.5 | 135 |
| 0 | 0 | 0 | 1 | 0 | 1 | 122 | 2.5 | 135 |
| 0 | 0 | 0 | 1 | 0 | 1 | 123 | 2.5 | 135 |
| 0 | 0 | 0 | 1 | 0 | 1 | 124 | 2.5 | 135 |
| 0 | 0 | 0 | 1 | 0 | 1 | 125 | 2.5 | 135 |
| 0 | 0 | 0 | 1 | 0 | 1 | 126 | 2.5 | 135 |
| 0 | 0 | 0 | 1 | 0 | 1 | 127 | 2.5 | 135 |
| 0 | 0 | 0 | 1 | 0 | 1 | 128 | 2.5 | 135 |
| 0 | 0 | 0 | 1 | 0 | 1 | 129 | 2.5 | 135 |
| 0 | 0 | 0 | 1 | 0 | 1 | 130 | 2.5 | 135 |
| 0 | 0 | 0 | 1 | 0 | 1 | 131 | 2.5 | 135 |
| 0 | 0 | 0 | 1 | 0 | 1 | 132 | 2.5 | 135 |
| 0 | 0 | 0 | 1 | 0 | 1 | 133 | 2.5 | 135 |
| 0 | 0 | 0 | 1 | 0 | 1 | 134 | 2.5 | 135 |
| 0 | 0 | 0 | 1 | 0 | 1 | 135 | 2.5 | 135 |
| 0 | 0 | 0 | 1 | 0 | 1 | 136 | 2.5 | 135 |
| 0 | 0 | 0 | 1 | 0 | 1 | 137 | 2.5 | 135 |
| 0 | 0 | 0 | 1 | 0 | 1 | 138 | 2.5 | 135 |
| 0 | 0 | 0 | 1 | 0 | 1 | 139 | 2.5 | 135 |
| 0 | 0 | 0 | 1 | 0 | 1 | 140 | 2.5 | 135 |
| 0 | 0 | 0 | 1 | 0 | 1 | 141 | 2.5 | 135 |
| 0 | 0 | 0 | 1 | 0 | 1 | 142 | 2.5 | 135 |
| 0 | 0 | 0 | 1 | 0 | 1 | 143 | 2.5 | 135 |
| 0 | 0 | 0 | 1 | 0 | 1 | 144 | 2.5 | 135 |

|   |   |   |   |   |   |     |     |     |
|---|---|---|---|---|---|-----|-----|-----|
| 0 | 0 | 0 | 1 | 0 | 1 | 145 | 2.5 | 135 |
| 0 | 0 | 0 | 1 | 0 | 1 | 146 | 2.5 | 135 |
| 0 | 0 | 0 | 1 | 0 | 1 | 147 | 2.5 | 135 |
| 0 | 0 | 0 | 1 | 0 | 1 | 148 | 2.5 | 135 |
| 0 | 0 | 0 | 1 | 0 | 1 | 149 | 2.5 | 135 |
| 0 | 0 | 0 | 0 | 1 | 1 | 0   | 2.5 | 0   |
| 0 | 0 | 0 | 0 | 1 | 1 | 1   | 2.5 | 15  |
| 0 | 0 | 0 | 0 | 1 | 1 | 2   | 2.5 | 15  |
| 0 | 0 | 0 | 0 | 1 | 1 | 3   | 2.5 | 15  |
| 0 | 0 | 0 | 0 | 1 | 1 | 4   | 2.5 | 15  |
| 0 | 0 | 0 | 0 | 1 | 1 | 5   | 2.5 | 15  |
| 0 | 0 | 0 | 0 | 1 | 1 | 6   | 2.5 | 15  |
| 0 | 0 | 0 | 0 | 1 | 1 | 7   | 2.5 | 15  |
| 0 | 0 | 0 | 0 | 1 | 1 | 8   | 2.5 | 15  |
| 0 | 0 | 0 | 0 | 1 | 1 | 9   | 2.5 | 15  |
| 0 | 0 | 0 | 0 | 1 | 1 | 10  | 2.5 | 15  |
| 0 | 0 | 0 | 0 | 1 | 1 | 11  | 2.5 | 15  |
| 0 | 0 | 0 | 0 | 1 | 1 | 12  | 2.5 | 15  |
| 0 | 0 | 0 | 0 | 1 | 1 | 13  | 2.5 | 15  |
| 0 | 0 | 0 | 0 | 1 | 1 | 14  | 2.5 | 15  |
| 0 | 0 | 0 | 0 | 1 | 1 | 15  | 2.5 | 15  |
| 0 | 0 | 0 | 0 | 1 | 1 | 16  | 2.5 | 15  |
| 0 | 0 | 0 | 0 | 1 | 1 | 17  | 2.5 | 15  |
| 0 | 0 | 0 | 0 | 1 | 1 | 18  | 2.5 | 15  |
| 0 | 0 | 0 | 0 | 1 | 1 | 19  | 2.5 | 15  |
| 0 | 0 | 0 | 0 | 1 | 1 | 20  | 2.5 | 15  |
| 0 | 0 | 0 | 0 | 1 | 1 | 21  | 2.5 | 15  |
| 0 | 0 | 0 | 0 | 1 | 1 | 22  | 2.5 | 15  |
| 0 | 0 | 0 | 0 | 1 | 1 | 23  | 2.5 | 15  |
| 0 | 0 | 0 | 0 | 1 | 1 | 24  | 2.5 | 15  |
| 0 | 0 | 0 | 0 | 1 | 1 | 25  | 2.5 | 15  |
| 0 | 0 | 0 | 0 | 1 | 1 | 26  | 2.5 | 15  |
| 0 | 0 | 0 | 0 | 1 | 1 | 27  | 2.5 | 15  |
| 0 | 0 | 0 | 0 | 1 | 1 | 28  | 2.5 | 15  |
| 0 | 0 | 0 | 0 | 1 | 1 | 29  | 2.5 | 15  |
| 0 | 0 | 0 | 0 | 1 | 1 | 30  | 2.5 | 30  |
| 0 | 0 | 0 | 0 | 1 | 1 | 31  | 2.5 | 45  |
| 0 | 0 | 0 | 0 | 1 | 1 | 32  | 2.5 | 45  |
| 0 | 0 | 0 | 0 | 1 | 1 | 33  | 2.5 | 45  |
| 0 | 0 | 0 | 0 | 1 | 1 | 34  | 2.5 | 45  |
| 0 | 0 | 0 | 0 | 1 | 1 | 35  | 2.5 | 45  |
| 0 | 0 | 0 | 0 | 1 | 1 | 36  | 2.5 | 45  |
| 0 | 0 | 0 | 0 | 1 | 1 | 37  | 2.5 | 45  |
| 0 | 0 | 0 | 0 | 1 | 1 | 38  | 2.5 | 45  |
| 0 | 0 | 0 | 0 | 1 | 1 | 39  | 2.5 | 45  |
| 0 | 0 | 0 | 0 | 1 | 1 | 40  | 2.5 | 45  |

|   |   |   |   |   |   |    |     |    |
|---|---|---|---|---|---|----|-----|----|
| 0 | 0 | 0 | 0 | 1 | 1 | 41 | 2.5 | 45 |
| 0 | 0 | 0 | 0 | 1 | 1 | 42 | 2.5 | 45 |
| 0 | 0 | 0 | 0 | 1 | 1 | 43 | 2.5 | 45 |
| 0 | 0 | 0 | 0 | 1 | 1 | 44 | 2.5 | 45 |
| 0 | 0 | 0 | 0 | 1 | 1 | 45 | 2.5 | 45 |
| 0 | 0 | 0 | 0 | 1 | 1 | 46 | 2.5 | 45 |
| 0 | 0 | 0 | 0 | 1 | 1 | 47 | 2.5 | 45 |
| 0 | 0 | 0 | 0 | 1 | 1 | 48 | 2.5 | 45 |
| 0 | 0 | 0 | 0 | 1 | 1 | 49 | 2.5 | 45 |
| 0 | 0 | 0 | 0 | 1 | 1 | 50 | 2.5 | 45 |
| 0 | 0 | 0 | 0 | 1 | 1 | 51 | 2.5 | 45 |
| 0 | 0 | 0 | 0 | 1 | 1 | 52 | 2.5 | 45 |
| 0 | 0 | 0 | 0 | 1 | 1 | 53 | 2.5 | 45 |
| 0 | 0 | 0 | 0 | 1 | 1 | 54 | 2.5 | 45 |
| 0 | 0 | 0 | 0 | 1 | 1 | 55 | 2.5 | 45 |
| 0 | 0 | 0 | 0 | 1 | 1 | 56 | 2.5 | 45 |
| 0 | 0 | 0 | 0 | 1 | 1 | 57 | 2.5 | 45 |
| 0 | 0 | 0 | 0 | 1 | 1 | 58 | 2.5 | 45 |
| 0 | 0 | 0 | 0 | 1 | 1 | 59 | 2.5 | 45 |
| 0 | 0 | 0 | 0 | 1 | 1 | 60 | 2.5 | 60 |
| 0 | 0 | 0 | 0 | 1 | 1 | 61 | 2.5 | 75 |
| 0 | 0 | 0 | 0 | 1 | 1 | 62 | 2.5 | 75 |
| 0 | 0 | 0 | 0 | 1 | 1 | 63 | 2.5 | 75 |
| 0 | 0 | 0 | 0 | 1 | 1 | 64 | 2.5 | 75 |
| 0 | 0 | 0 | 0 | 1 | 1 | 65 | 2.5 | 75 |
| 0 | 0 | 0 | 0 | 1 | 1 | 66 | 2.5 | 75 |
| 0 | 0 | 0 | 0 | 1 | 1 | 67 | 2.5 | 75 |
| 0 | 0 | 0 | 0 | 1 | 1 | 68 | 2.5 | 75 |
| 0 | 0 | 0 | 0 | 1 | 1 | 69 | 2.5 | 75 |
| 0 | 0 | 0 | 0 | 1 | 1 | 70 | 2.5 | 75 |
| 0 | 0 | 0 | 0 | 1 | 1 | 71 | 2.5 | 75 |
| 0 | 0 | 0 | 0 | 1 | 1 | 72 | 2.5 | 75 |
| 0 | 0 | 0 | 0 | 1 | 1 | 73 | 2.5 | 75 |
| 0 | 0 | 0 | 0 | 1 | 1 | 74 | 2.5 | 75 |
| 0 | 0 | 0 | 0 | 1 | 1 | 75 | 2.5 | 75 |
| 0 | 0 | 0 | 0 | 1 | 1 | 76 | 2.5 | 75 |
| 0 | 0 | 0 | 0 | 1 | 1 | 77 | 2.5 | 75 |
| 0 | 0 | 0 | 0 | 1 | 1 | 78 | 2.5 | 75 |
| 0 | 0 | 0 | 0 | 1 | 1 | 79 | 2.5 | 75 |
| 0 | 0 | 0 | 0 | 1 | 1 | 80 | 2.5 | 75 |
| 0 | 0 | 0 | 0 | 1 | 1 | 81 | 2.5 | 75 |
| 0 | 0 | 0 | 0 | 1 | 1 | 82 | 2.5 | 75 |
| 0 | 0 | 0 | 0 | 1 | 1 | 83 | 2.5 | 75 |
| 0 | 0 | 0 | 0 | 1 | 1 | 84 | 2.5 | 75 |
| 0 | 0 | 0 | 0 | 1 | 1 | 85 | 2.5 | 75 |
| 0 | 0 | 0 | 0 | 1 | 1 | 86 | 2.5 | 75 |

|   |   |   |   |   |   |     |     |     |
|---|---|---|---|---|---|-----|-----|-----|
| 0 | 0 | 0 | 0 | 1 | 1 | 87  | 2.5 | 75  |
| 0 | 0 | 0 | 0 | 1 | 1 | 88  | 2.5 | 75  |
| 0 | 0 | 0 | 0 | 1 | 1 | 89  | 2.5 | 75  |
| 0 | 0 | 0 | 0 | 1 | 1 | 90  | 2.5 | 90  |
| 0 | 0 | 0 | 0 | 1 | 1 | 91  | 2.5 | 105 |
| 0 | 0 | 0 | 0 | 1 | 1 | 92  | 2.5 | 105 |
| 0 | 0 | 0 | 0 | 1 | 1 | 93  | 2.5 | 105 |
| 0 | 0 | 0 | 0 | 1 | 1 | 94  | 2.5 | 105 |
| 0 | 0 | 0 | 0 | 1 | 1 | 95  | 2.5 | 105 |
| 0 | 0 | 0 | 0 | 1 | 1 | 96  | 2.5 | 105 |
| 0 | 0 | 0 | 0 | 1 | 1 | 97  | 2.5 | 105 |
| 0 | 0 | 0 | 0 | 1 | 1 | 98  | 2.5 | 105 |
| 0 | 0 | 0 | 0 | 1 | 1 | 99  | 2.5 | 105 |
| 0 | 0 | 0 | 0 | 1 | 1 | 100 | 2.5 | 105 |
| 0 | 0 | 0 | 0 | 1 | 1 | 101 | 2.5 | 105 |
| 0 | 0 | 0 | 0 | 1 | 1 | 102 | 2.5 | 105 |
| 0 | 0 | 0 | 0 | 1 | 1 | 103 | 2.5 | 105 |
| 0 | 0 | 0 | 0 | 1 | 1 | 104 | 2.5 | 105 |
| 0 | 0 | 0 | 0 | 1 | 1 | 105 | 2.5 | 105 |
| 0 | 0 | 0 | 0 | 1 | 1 | 106 | 2.5 | 105 |
| 0 | 0 | 0 | 0 | 1 | 1 | 107 | 2.5 | 105 |
| 0 | 0 | 0 | 0 | 1 | 1 | 108 | 2.5 | 105 |
| 0 | 0 | 0 | 0 | 1 | 1 | 109 | 2.5 | 105 |
| 0 | 0 | 0 | 0 | 1 | 1 | 110 | 2.5 | 105 |
| 0 | 0 | 0 | 0 | 1 | 1 | 111 | 2.5 | 105 |
| 0 | 0 | 0 | 0 | 1 | 1 | 112 | 2.5 | 105 |
| 0 | 0 | 0 | 0 | 1 | 1 | 113 | 2.5 | 105 |
| 0 | 0 | 0 | 0 | 1 | 1 | 114 | 2.5 | 105 |
| 0 | 0 | 0 | 0 | 1 | 1 | 115 | 2.5 | 105 |
| 0 | 0 | 0 | 0 | 1 | 1 | 116 | 2.5 | 105 |
| 0 | 0 | 0 | 0 | 1 | 1 | 117 | 2.5 | 105 |
| 0 | 0 | 0 | 0 | 1 | 1 | 118 | 2.5 | 105 |
| 0 | 0 | 0 | 0 | 1 | 1 | 119 | 2.5 | 105 |
| 0 | 1 | 1 | 1 | 0 | 0 | 0   | 2.5 | 0   |
| 0 | 1 | 1 | 1 | 0 | 0 | 1   | 2.5 | 15  |
| 0 | 1 | 1 | 1 | 0 | 0 | 2   | 2.5 | 15  |
| 0 | 1 | 1 | 1 | 0 | 0 | 3   | 2.5 | 15  |
| 0 | 1 | 1 | 1 | 0 | 0 | 4   | 2.5 | 15  |
| 0 | 1 | 1 | 1 | 0 | 0 | 5   | 2.5 | 15  |
| 0 | 1 | 1 | 1 | 0 | 0 | 6   | 2.5 | 15  |
| 0 | 1 | 1 | 1 | 0 | 0 | 7   | 2.5 | 15  |
| 0 | 1 | 1 | 1 | 0 | 0 | 8   | 2.5 | 15  |
| 0 | 1 | 1 | 1 | 0 | 0 | 9   | 2.5 | 15  |
| 0 | 1 | 1 | 1 | 0 | 0 | 10  | 2.5 | 15  |
| 0 | 1 | 1 | 1 | 0 | 0 | 11  | 2.5 | 15  |
| 0 | 1 | 1 | 1 | 0 | 0 | 12  | 2.5 | 15  |

|   |   |   |   |   |   |     |     |     |
|---|---|---|---|---|---|-----|-----|-----|
| 0 | 1 | 1 | 1 | 0 | 0 | 13  | 2.5 | 15  |
| 0 | 1 | 1 | 1 | 0 | 0 | 14  | 2.5 | 15  |
| 0 | 1 | 1 | 1 | 0 | 0 | 15  | 2.5 | 15  |
| 0 | 1 | 1 | 1 | 0 | 0 | 16  | 2.5 | 15  |
| 0 | 1 | 1 | 1 | 0 | 0 | 17  | 2.5 | 15  |
| 0 | 1 | 1 | 1 | 0 | 0 | 18  | 2.5 | 15  |
| 0 | 1 | 1 | 1 | 0 | 0 | 19  | 2.5 | 15  |
| 0 | 1 | 1 | 1 | 0 | 0 | 20  | 2.5 | 15  |
| 0 | 1 | 1 | 1 | 0 | 0 | 21  | 2.5 | 15  |
| 0 | 1 | 1 | 1 | 0 | 0 | 22  | 2.5 | 15  |
| 0 | 1 | 1 | 1 | 0 | 0 | 23  | 2.5 | 15  |
| 0 | 1 | 1 | 1 | 0 | 0 | 24  | 2.5 | 15  |
| 0 | 1 | 1 | 1 | 0 | 0 | 25  | 2.5 | 15  |
| 0 | 1 | 1 | 1 | 0 | 0 | 26  | 2.5 | 15  |
| 0 | 1 | 1 | 1 | 0 | 0 | 27  | 2.5 | 15  |
| 0 | 1 | 1 | 1 | 0 | 0 | 28  | 2.5 | 15  |
| 0 | 1 | 1 | 1 | 0 | 0 | 29  | 2.5 | 15  |
| 0 | 1 | 1 | 1 | 0 | 0 | 121 | 2.5 | 135 |
| 0 | 1 | 1 | 1 | 0 | 0 | 122 | 2.5 | 135 |
| 0 | 1 | 1 | 1 | 0 | 0 | 123 | 2.5 | 135 |
| 0 | 1 | 1 | 1 | 0 | 0 | 124 | 2.5 | 135 |
| 0 | 1 | 1 | 1 | 0 | 0 | 125 | 2.5 | 135 |
| 0 | 1 | 1 | 1 | 0 | 0 | 126 | 2.5 | 135 |
| 0 | 1 | 1 | 1 | 0 | 0 | 127 | 2.5 | 135 |
| 0 | 1 | 1 | 1 | 0 | 0 | 128 | 2.5 | 135 |
| 0 | 1 | 1 | 1 | 0 | 0 | 129 | 2.5 | 135 |
| 0 | 1 | 1 | 1 | 0 | 0 | 130 | 2.5 | 135 |
| 0 | 1 | 1 | 1 | 0 | 0 | 131 | 2.5 | 135 |
| 0 | 1 | 1 | 1 | 0 | 0 | 132 | 2.5 | 135 |
| 0 | 1 | 1 | 1 | 0 | 0 | 133 | 2.5 | 135 |
| 0 | 1 | 1 | 1 | 0 | 0 | 134 | 2.5 | 135 |
| 0 | 1 | 1 | 1 | 0 | 0 | 135 | 2.5 | 135 |
| 0 | 1 | 1 | 1 | 0 | 0 | 136 | 2.5 | 135 |
| 0 | 1 | 1 | 1 | 0 | 0 | 137 | 2.5 | 135 |
| 0 | 1 | 1 | 1 | 0 | 0 | 138 | 2.5 | 135 |
| 0 | 1 | 1 | 1 | 0 | 0 | 139 | 2.5 | 135 |
| 0 | 1 | 1 | 1 | 0 | 0 | 140 | 2.5 | 135 |
| 0 | 1 | 1 | 1 | 0 | 0 | 141 | 2.5 | 135 |
| 0 | 1 | 1 | 1 | 0 | 0 | 142 | 2.5 | 135 |
| 0 | 1 | 1 | 1 | 0 | 0 | 143 | 2.5 | 135 |
| 0 | 1 | 1 | 1 | 0 | 0 | 144 | 2.5 | 135 |
| 0 | 1 | 1 | 1 | 0 | 0 | 145 | 2.5 | 135 |
| 0 | 1 | 1 | 1 | 0 | 0 | 146 | 2.5 | 135 |
| 0 | 1 | 1 | 1 | 0 | 0 | 147 | 2.5 | 135 |
| 0 | 1 | 1 | 1 | 0 | 0 | 148 | 2.5 | 135 |
| 0 | 1 | 1 | 1 | 0 | 0 | 149 | 2.5 | 135 |

|   |   |   |   |   |   |     |     |     |
|---|---|---|---|---|---|-----|-----|-----|
| 0 | 1 | 1 | 1 | 0 | 0 | 150 | 2.5 | 150 |
| 0 | 1 | 1 | 1 | 0 | 0 | 151 | 2.5 | 165 |
| 0 | 1 | 1 | 1 | 0 | 0 | 152 | 2.5 | 165 |
| 0 | 1 | 1 | 1 | 0 | 0 | 153 | 2.5 | 165 |
| 0 | 1 | 1 | 1 | 0 | 0 | 154 | 2.5 | 165 |
| 0 | 1 | 1 | 1 | 0 | 0 | 155 | 2.5 | 165 |
| 0 | 1 | 1 | 1 | 0 | 0 | 156 | 2.5 | 165 |
| 0 | 1 | 1 | 1 | 0 | 0 | 157 | 2.5 | 165 |
| 0 | 1 | 1 | 1 | 0 | 0 | 158 | 2.5 | 165 |
| 0 | 1 | 1 | 1 | 0 | 0 | 159 | 2.5 | 165 |
| 0 | 1 | 1 | 1 | 0 | 0 | 160 | 2.5 | 165 |
| 0 | 1 | 1 | 1 | 0 | 0 | 161 | 2.5 | 165 |
| 0 | 1 | 1 | 1 | 0 | 0 | 162 | 2.5 | 165 |
| 0 | 1 | 1 | 1 | 0 | 0 | 163 | 2.5 | 165 |
| 0 | 1 | 1 | 1 | 0 | 0 | 164 | 2.5 | 165 |
| 0 | 1 | 1 | 1 | 0 | 0 | 165 | 2.5 | 165 |
| 0 | 1 | 1 | 1 | 0 | 0 | 166 | 2.5 | 165 |
| 0 | 1 | 1 | 1 | 0 | 0 | 167 | 2.5 | 165 |
| 0 | 1 | 1 | 1 | 0 | 0 | 168 | 2.5 | 165 |
| 0 | 1 | 1 | 1 | 0 | 0 | 169 | 2.5 | 165 |
| 0 | 1 | 1 | 1 | 0 | 0 | 170 | 2.5 | 165 |
| 0 | 1 | 1 | 1 | 0 | 0 | 171 | 2.5 | 165 |
| 0 | 1 | 1 | 1 | 0 | 0 | 172 | 2.5 | 165 |
| 0 | 1 | 1 | 1 | 0 | 0 | 173 | 2.5 | 165 |
| 0 | 1 | 1 | 1 | 0 | 0 | 174 | 2.5 | 165 |
| 0 | 1 | 1 | 1 | 0 | 0 | 175 | 2.5 | 165 |
| 0 | 1 | 1 | 1 | 0 | 0 | 176 | 2.5 | 165 |
| 0 | 1 | 1 | 1 | 0 | 0 | 177 | 2.5 | 165 |
| 0 | 1 | 1 | 1 | 0 | 0 | 178 | 2.5 | 165 |
| 0 | 1 | 1 | 1 | 0 | 0 | 179 | 2.5 | 165 |
| 0 | 1 | 1 | 1 | 0 | 0 | 180 | 2.5 | 180 |
| 0 | 1 | 1 | 0 | 1 | 0 | 0   | 2.5 | 0   |
| 0 | 1 | 1 | 0 | 1 | 0 | 1   | 2.5 | 15  |
| 0 | 1 | 1 | 0 | 1 | 0 | 2   | 2.5 | 15  |
| 0 | 1 | 1 | 0 | 1 | 0 | 3   | 2.5 | 15  |
| 0 | 1 | 1 | 0 | 1 | 0 | 4   | 2.5 | 15  |
| 0 | 1 | 1 | 0 | 1 | 0 | 5   | 2.5 | 15  |
| 0 | 1 | 1 | 0 | 1 | 0 | 6   | 2.5 | 15  |
| 0 | 1 | 1 | 0 | 1 | 0 | 7   | 2.5 | 15  |
| 0 | 1 | 1 | 0 | 1 | 0 | 8   | 2.5 | 15  |
| 0 | 1 | 1 | 0 | 1 | 0 | 9   | 2.5 | 15  |
| 0 | 1 | 1 | 0 | 1 | 0 | 10  | 2.5 | 15  |
| 0 | 1 | 1 | 0 | 1 | 0 | 11  | 2.5 | 15  |
| 0 | 1 | 1 | 0 | 1 | 0 | 12  | 2.5 | 15  |
| 0 | 1 | 1 | 0 | 1 | 0 | 13  | 2.5 | 15  |
| 0 | 1 | 1 | 0 | 1 | 0 | 14  | 2.5 | 15  |

|   |   |   |   |   |   |     |     |     |
|---|---|---|---|---|---|-----|-----|-----|
| 0 | 1 | 1 | 0 | 1 | 0 | 15  | 2.5 | 15  |
| 0 | 1 | 1 | 0 | 1 | 0 | 16  | 2.5 | 15  |
| 0 | 1 | 1 | 0 | 1 | 0 | 17  | 2.5 | 15  |
| 0 | 1 | 1 | 0 | 1 | 0 | 18  | 2.5 | 15  |
| 0 | 1 | 1 | 0 | 1 | 0 | 19  | 2.5 | 15  |
| 0 | 1 | 1 | 0 | 1 | 0 | 20  | 2.5 | 15  |
| 0 | 1 | 1 | 0 | 1 | 0 | 21  | 2.5 | 15  |
| 0 | 1 | 1 | 0 | 1 | 0 | 22  | 2.5 | 15  |
| 0 | 1 | 1 | 0 | 1 | 0 | 23  | 2.5 | 15  |
| 0 | 1 | 1 | 0 | 1 | 0 | 24  | 2.5 | 15  |
| 0 | 1 | 1 | 0 | 1 | 0 | 25  | 2.5 | 15  |
| 0 | 1 | 1 | 0 | 1 | 0 | 26  | 2.5 | 15  |
| 0 | 1 | 1 | 0 | 1 | 0 | 27  | 2.5 | 15  |
| 0 | 1 | 1 | 0 | 1 | 0 | 28  | 2.5 | 15  |
| 0 | 1 | 1 | 0 | 1 | 0 | 29  | 2.5 | 15  |
| 0 | 1 | 1 | 0 | 1 | 0 | 91  | 2.5 | 105 |
| 0 | 1 | 1 | 0 | 1 | 0 | 92  | 2.5 | 105 |
| 0 | 1 | 1 | 0 | 1 | 0 | 93  | 2.5 | 105 |
| 0 | 1 | 1 | 0 | 1 | 0 | 94  | 2.5 | 105 |
| 0 | 1 | 1 | 0 | 1 | 0 | 95  | 2.5 | 105 |
| 0 | 1 | 1 | 0 | 1 | 0 | 96  | 2.5 | 105 |
| 0 | 1 | 1 | 0 | 1 | 0 | 97  | 2.5 | 105 |
| 0 | 1 | 1 | 0 | 1 | 0 | 98  | 2.5 | 105 |
| 0 | 1 | 1 | 0 | 1 | 0 | 99  | 2.5 | 105 |
| 0 | 1 | 1 | 0 | 1 | 0 | 100 | 2.5 | 105 |
| 0 | 1 | 1 | 0 | 1 | 0 | 101 | 2.5 | 105 |
| 0 | 1 | 1 | 0 | 1 | 0 | 102 | 2.5 | 105 |
| 0 | 1 | 1 | 0 | 1 | 0 | 103 | 2.5 | 105 |
| 0 | 1 | 1 | 0 | 1 | 0 | 104 | 2.5 | 105 |
| 0 | 1 | 1 | 0 | 1 | 0 | 105 | 2.5 | 105 |
| 0 | 1 | 1 | 0 | 1 | 0 | 106 | 2.5 | 105 |
| 0 | 1 | 1 | 0 | 1 | 0 | 107 | 2.5 | 105 |
| 0 | 1 | 1 | 0 | 1 | 0 | 108 | 2.5 | 105 |
| 0 | 1 | 1 | 0 | 1 | 0 | 109 | 2.5 | 105 |
| 0 | 1 | 1 | 0 | 1 | 0 | 110 | 2.5 | 105 |
| 0 | 1 | 1 | 0 | 1 | 0 | 111 | 2.5 | 105 |
| 0 | 1 | 1 | 0 | 1 | 0 | 112 | 2.5 | 105 |
| 0 | 1 | 1 | 0 | 1 | 0 | 113 | 2.5 | 105 |
| 0 | 1 | 1 | 0 | 1 | 0 | 114 | 2.5 | 105 |
| 0 | 1 | 1 | 0 | 1 | 0 | 115 | 2.5 | 105 |
| 0 | 1 | 1 | 0 | 1 | 0 | 116 | 2.5 | 105 |
| 0 | 1 | 1 | 0 | 1 | 0 | 117 | 2.5 | 105 |
| 0 | 1 | 1 | 0 | 1 | 0 | 118 | 2.5 | 105 |
| 0 | 1 | 1 | 0 | 1 | 0 | 119 | 2.5 | 105 |
| 0 | 1 | 1 | 0 | 1 | 0 | 151 | 2.5 | 165 |
| 0 | 1 | 1 | 0 | 1 | 0 | 152 | 2.5 | 165 |
| 0 | 1 | 1 | 0 | 1 | 0 | 153 | 2.5 | 165 |

|   |   |   |   |   |   |     |     |     |
|---|---|---|---|---|---|-----|-----|-----|
| 0 | 1 | 1 | 0 | 1 | 0 | 154 | 2.5 | 165 |
| 0 | 1 | 1 | 0 | 1 | 0 | 155 | 2.5 | 165 |
| 0 | 1 | 1 | 0 | 1 | 0 | 156 | 2.5 | 165 |
| 0 | 1 | 1 | 0 | 1 | 0 | 157 | 2.5 | 165 |
| 0 | 1 | 1 | 0 | 1 | 0 | 158 | 2.5 | 165 |
| 0 | 1 | 1 | 0 | 1 | 0 | 159 | 2.5 | 165 |
| 0 | 1 | 1 | 0 | 1 | 0 | 160 | 2.5 | 165 |
| 0 | 1 | 1 | 0 | 1 | 0 | 161 | 2.5 | 165 |
| 0 | 1 | 1 | 0 | 1 | 0 | 162 | 2.5 | 165 |
| 0 | 1 | 1 | 0 | 1 | 0 | 163 | 2.5 | 165 |
| 0 | 1 | 1 | 0 | 1 | 0 | 164 | 2.5 | 165 |
| 0 | 1 | 1 | 0 | 1 | 0 | 165 | 2.5 | 165 |
| 0 | 1 | 1 | 0 | 1 | 0 | 166 | 2.5 | 165 |
| 0 | 1 | 1 | 0 | 1 | 0 | 167 | 2.5 | 165 |
| 0 | 1 | 1 | 0 | 1 | 0 | 168 | 2.5 | 165 |
| 0 | 1 | 1 | 0 | 1 | 0 | 169 | 2.5 | 165 |
| 0 | 1 | 1 | 0 | 1 | 0 | 170 | 2.5 | 165 |
| 0 | 1 | 1 | 0 | 1 | 0 | 171 | 2.5 | 165 |
| 0 | 1 | 1 | 0 | 1 | 0 | 172 | 2.5 | 165 |
| 0 | 1 | 1 | 0 | 1 | 0 | 173 | 2.5 | 165 |
| 0 | 1 | 1 | 0 | 1 | 0 | 174 | 2.5 | 165 |
| 0 | 1 | 1 | 0 | 1 | 0 | 175 | 2.5 | 165 |
| 0 | 1 | 1 | 0 | 1 | 0 | 176 | 2.5 | 165 |
| 0 | 1 | 1 | 0 | 1 | 0 | 177 | 2.5 | 165 |
| 0 | 1 | 1 | 0 | 1 | 0 | 178 | 2.5 | 165 |
| 0 | 1 | 1 | 0 | 1 | 0 | 179 | 2.5 | 165 |
| 0 | 1 | 1 | 0 | 1 | 0 | 180 | 2.5 | 180 |
| 0 | 1 | 1 | 0 | 0 | 1 | 0   | 2.5 | 0   |
| 0 | 1 | 1 | 0 | 0 | 1 | 1   | 2.5 | 15  |
| 0 | 1 | 1 | 0 | 0 | 1 | 2   | 2.5 | 15  |
| 0 | 1 | 1 | 0 | 0 | 1 | 3   | 2.5 | 15  |
| 0 | 1 | 1 | 0 | 0 | 1 | 4   | 2.5 | 15  |
| 0 | 1 | 1 | 0 | 0 | 1 | 5   | 2.5 | 15  |
| 0 | 1 | 1 | 0 | 0 | 1 | 6   | 2.5 | 15  |
| 0 | 1 | 1 | 0 | 0 | 1 | 7   | 2.5 | 15  |
| 0 | 1 | 1 | 0 | 0 | 1 | 8   | 2.5 | 15  |
| 0 | 1 | 1 | 0 | 0 | 1 | 9   | 2.5 | 15  |
| 0 | 1 | 1 | 0 | 0 | 1 | 10  | 2.5 | 15  |
| 0 | 1 | 1 | 0 | 0 | 1 | 11  | 2.5 | 15  |
| 0 | 1 | 1 | 0 | 0 | 1 | 12  | 2.5 | 15  |
| 0 | 1 | 1 | 0 | 0 | 1 | 13  | 2.5 | 15  |
| 0 | 1 | 1 | 0 | 0 | 1 | 14  | 2.5 | 15  |
| 0 | 1 | 1 | 0 | 0 | 1 | 15  | 2.5 | 15  |
| 0 | 1 | 1 | 0 | 0 | 1 | 16  | 2.5 | 15  |
| 0 | 1 | 1 | 0 | 0 | 1 | 17  | 2.5 | 15  |
| 0 | 1 | 1 | 0 | 0 | 1 | 18  | 2.5 | 15  |

|   |   |   |   |   |   |     |     |     |
|---|---|---|---|---|---|-----|-----|-----|
| 0 | 1 | 1 | 0 | 0 | 1 | 19  | 2.5 | 15  |
| 0 | 1 | 1 | 0 | 0 | 1 | 20  | 2.5 | 15  |
| 0 | 1 | 1 | 0 | 0 | 1 | 21  | 2.5 | 15  |
| 0 | 1 | 1 | 0 | 0 | 1 | 22  | 2.5 | 15  |
| 0 | 1 | 1 | 0 | 0 | 1 | 23  | 2.5 | 15  |
| 0 | 1 | 1 | 0 | 0 | 1 | 24  | 2.5 | 15  |
| 0 | 1 | 1 | 0 | 0 | 1 | 25  | 2.5 | 15  |
| 0 | 1 | 1 | 0 | 0 | 1 | 26  | 2.5 | 15  |
| 0 | 1 | 1 | 0 | 0 | 1 | 27  | 2.5 | 15  |
| 0 | 1 | 1 | 0 | 0 | 1 | 28  | 2.5 | 15  |
| 0 | 1 | 1 | 0 | 0 | 1 | 29  | 2.5 | 15  |
| 0 | 1 | 1 | 0 | 0 | 1 | 91  | 2.5 | 105 |
| 0 | 1 | 1 | 0 | 0 | 1 | 92  | 2.5 | 105 |
| 0 | 1 | 1 | 0 | 0 | 1 | 93  | 2.5 | 105 |
| 0 | 1 | 1 | 0 | 0 | 1 | 94  | 2.5 | 105 |
| 0 | 1 | 1 | 0 | 0 | 1 | 95  | 2.5 | 105 |
| 0 | 1 | 1 | 0 | 0 | 1 | 96  | 2.5 | 105 |
| 0 | 1 | 1 | 0 | 0 | 1 | 97  | 2.5 | 105 |
| 0 | 1 | 1 | 0 | 0 | 1 | 98  | 2.5 | 105 |
| 0 | 1 | 1 | 0 | 0 | 1 | 99  | 2.5 | 105 |
| 0 | 1 | 1 | 0 | 0 | 1 | 100 | 2.5 | 105 |
| 0 | 1 | 1 | 0 | 0 | 1 | 101 | 2.5 | 105 |
| 0 | 1 | 1 | 0 | 0 | 1 | 102 | 2.5 | 105 |
| 0 | 1 | 1 | 0 | 0 | 1 | 103 | 2.5 | 105 |
| 0 | 1 | 1 | 0 | 0 | 1 | 104 | 2.5 | 105 |
| 0 | 1 | 1 | 0 | 0 | 1 | 105 | 2.5 | 105 |
| 0 | 1 | 1 | 0 | 0 | 1 | 106 | 2.5 | 105 |
| 0 | 1 | 1 | 0 | 0 | 1 | 107 | 2.5 | 105 |
| 0 | 1 | 1 | 0 | 0 | 1 | 108 | 2.5 | 105 |
| 0 | 1 | 1 | 0 | 0 | 1 | 109 | 2.5 | 105 |
| 0 | 1 | 1 | 0 | 0 | 1 | 110 | 2.5 | 105 |
| 0 | 1 | 1 | 0 | 0 | 1 | 111 | 2.5 | 105 |
| 0 | 1 | 1 | 0 | 0 | 1 | 112 | 2.5 | 105 |
| 0 | 1 | 1 | 0 | 0 | 1 | 113 | 2.5 | 105 |
| 0 | 1 | 1 | 0 | 0 | 1 | 114 | 2.5 | 105 |
| 0 | 1 | 1 | 0 | 0 | 1 | 115 | 2.5 | 105 |
| 0 | 1 | 1 | 0 | 0 | 1 | 116 | 2.5 | 105 |
| 0 | 1 | 1 | 0 | 0 | 1 | 117 | 2.5 | 105 |
| 0 | 1 | 1 | 0 | 0 | 1 | 118 | 2.5 | 105 |
| 0 | 1 | 1 | 0 | 0 | 1 | 119 | 2.5 | 105 |
| 0 | 1 | 1 | 0 | 0 | 1 | 120 | 2.5 | 120 |
| 0 | 1 | 1 | 0 | 0 | 1 | 121 | 2.5 | 135 |
| 0 | 1 | 1 | 0 | 0 | 1 | 122 | 2.5 | 135 |
| 0 | 1 | 1 | 0 | 0 | 1 | 123 | 2.5 | 135 |
| 0 | 1 | 1 | 0 | 0 | 1 | 124 | 2.5 | 135 |
| 0 | 1 | 1 | 0 | 0 | 1 | 125 | 2.5 | 135 |

|   |   |   |   |   |   |     |     |     |
|---|---|---|---|---|---|-----|-----|-----|
| 0 | 1 | 1 | 0 | 0 | 1 | 126 | 2.5 | 135 |
| 0 | 1 | 1 | 0 | 0 | 1 | 127 | 2.5 | 135 |
| 0 | 1 | 1 | 0 | 0 | 1 | 128 | 2.5 | 135 |
| 0 | 1 | 1 | 0 | 0 | 1 | 129 | 2.5 | 135 |
| 0 | 1 | 1 | 0 | 0 | 1 | 130 | 2.5 | 135 |
| 0 | 1 | 1 | 0 | 0 | 1 | 131 | 2.5 | 135 |
| 0 | 1 | 1 | 0 | 0 | 1 | 132 | 2.5 | 135 |
| 0 | 1 | 1 | 0 | 0 | 1 | 133 | 2.5 | 135 |
| 0 | 1 | 1 | 0 | 0 | 1 | 134 | 2.5 | 135 |
| 0 | 1 | 1 | 0 | 0 | 1 | 135 | 2.5 | 135 |
| 0 | 1 | 1 | 0 | 0 | 1 | 136 | 2.5 | 135 |
| 0 | 1 | 1 | 0 | 0 | 1 | 137 | 2.5 | 135 |
| 0 | 1 | 1 | 0 | 0 | 1 | 138 | 2.5 | 135 |
| 0 | 1 | 1 | 0 | 0 | 1 | 139 | 2.5 | 135 |
| 0 | 1 | 1 | 0 | 0 | 1 | 140 | 2.5 | 135 |
| 0 | 1 | 1 | 0 | 0 | 1 | 141 | 2.5 | 135 |
| 0 | 1 | 1 | 0 | 0 | 1 | 142 | 2.5 | 135 |
| 0 | 1 | 1 | 0 | 0 | 1 | 143 | 2.5 | 135 |
| 0 | 1 | 1 | 0 | 0 | 1 | 144 | 2.5 | 135 |
| 0 | 1 | 1 | 0 | 0 | 1 | 145 | 2.5 | 135 |
| 0 | 1 | 1 | 0 | 0 | 1 | 146 | 2.5 | 135 |
| 0 | 1 | 1 | 0 | 0 | 1 | 147 | 2.5 | 135 |
| 0 | 1 | 1 | 0 | 0 | 1 | 148 | 2.5 | 135 |
| 0 | 1 | 1 | 0 | 0 | 1 | 149 | 2.5 | 135 |
| 0 | 1 | 0 | 1 | 1 | 0 | 0   | 2.5 | 0   |
| 0 | 1 | 0 | 1 | 1 | 0 | 1   | 2.5 | 15  |
| 0 | 1 | 0 | 1 | 1 | 0 | 2   | 2.5 | 15  |
| 0 | 1 | 0 | 1 | 1 | 0 | 3   | 2.5 | 15  |
| 0 | 1 | 0 | 1 | 1 | 0 | 4   | 2.5 | 15  |
| 0 | 1 | 0 | 1 | 1 | 0 | 5   | 2.5 | 15  |
| 0 | 1 | 0 | 1 | 1 | 0 | 6   | 2.5 | 15  |
| 0 | 1 | 0 | 1 | 1 | 0 | 7   | 2.5 | 15  |
| 0 | 1 | 0 | 1 | 1 | 0 | 8   | 2.5 | 15  |
| 0 | 1 | 0 | 1 | 1 | 0 | 9   | 2.5 | 15  |
| 0 | 1 | 0 | 1 | 1 | 0 | 10  | 2.5 | 15  |
| 0 | 1 | 0 | 1 | 1 | 0 | 11  | 2.5 | 15  |
| 0 | 1 | 0 | 1 | 1 | 0 | 12  | 2.5 | 15  |
| 0 | 1 | 0 | 1 | 1 | 0 | 13  | 2.5 | 15  |
| 0 | 1 | 0 | 1 | 1 | 0 | 14  | 2.5 | 15  |
| 0 | 1 | 0 | 1 | 1 | 0 | 15  | 2.5 | 15  |
| 0 | 1 | 0 | 1 | 1 | 0 | 16  | 2.5 | 15  |
| 0 | 1 | 0 | 1 | 1 | 0 | 17  | 2.5 | 15  |
| 0 | 1 | 0 | 1 | 1 | 0 | 18  | 2.5 | 15  |
| 0 | 1 | 0 | 1 | 1 | 0 | 19  | 2.5 | 15  |
| 0 | 1 | 0 | 1 | 1 | 0 | 20  | 2.5 | 15  |
| 0 | 1 | 0 | 1 | 1 | 0 | 21  | 2.5 | 15  |

|   |   |   |   |   |   |     |     |     |
|---|---|---|---|---|---|-----|-----|-----|
| 0 | 1 | 0 | 1 | 1 | 0 | 22  | 2.5 | 15  |
| 0 | 1 | 0 | 1 | 1 | 0 | 23  | 2.5 | 15  |
| 0 | 1 | 0 | 1 | 1 | 0 | 24  | 2.5 | 15  |
| 0 | 1 | 0 | 1 | 1 | 0 | 25  | 2.5 | 15  |
| 0 | 1 | 0 | 1 | 1 | 0 | 26  | 2.5 | 15  |
| 0 | 1 | 0 | 1 | 1 | 0 | 27  | 2.5 | 15  |
| 0 | 1 | 0 | 1 | 1 | 0 | 28  | 2.5 | 15  |
| 0 | 1 | 0 | 1 | 1 | 0 | 29  | 2.5 | 15  |
| 0 | 1 | 0 | 1 | 1 | 0 | 61  | 2.5 | 75  |
| 0 | 1 | 0 | 1 | 1 | 0 | 62  | 2.5 | 75  |
| 0 | 1 | 0 | 1 | 1 | 0 | 63  | 2.5 | 75  |
| 0 | 1 | 0 | 1 | 1 | 0 | 64  | 2.5 | 75  |
| 0 | 1 | 0 | 1 | 1 | 0 | 65  | 2.5 | 75  |
| 0 | 1 | 0 | 1 | 1 | 0 | 66  | 2.5 | 75  |
| 0 | 1 | 0 | 1 | 1 | 0 | 67  | 2.5 | 75  |
| 0 | 1 | 0 | 1 | 1 | 0 | 68  | 2.5 | 75  |
| 0 | 1 | 0 | 1 | 1 | 0 | 69  | 2.5 | 75  |
| 0 | 1 | 0 | 1 | 1 | 0 | 70  | 2.5 | 75  |
| 0 | 1 | 0 | 1 | 1 | 0 | 71  | 2.5 | 75  |
| 0 | 1 | 0 | 1 | 1 | 0 | 72  | 2.5 | 75  |
| 0 | 1 | 0 | 1 | 1 | 0 | 73  | 2.5 | 75  |
| 0 | 1 | 0 | 1 | 1 | 0 | 74  | 2.5 | 75  |
| 0 | 1 | 0 | 1 | 1 | 0 | 75  | 2.5 | 75  |
| 0 | 1 | 0 | 1 | 1 | 0 | 76  | 2.5 | 75  |
| 0 | 1 | 0 | 1 | 1 | 0 | 77  | 2.5 | 75  |
| 0 | 1 | 0 | 1 | 1 | 0 | 78  | 2.5 | 75  |
| 0 | 1 | 0 | 1 | 1 | 0 | 79  | 2.5 | 75  |
| 0 | 1 | 0 | 1 | 1 | 0 | 80  | 2.5 | 75  |
| 0 | 1 | 0 | 1 | 1 | 0 | 81  | 2.5 | 75  |
| 0 | 1 | 0 | 1 | 1 | 0 | 82  | 2.5 | 75  |
| 0 | 1 | 0 | 1 | 1 | 0 | 83  | 2.5 | 75  |
| 0 | 1 | 0 | 1 | 1 | 0 | 84  | 2.5 | 75  |
| 0 | 1 | 0 | 1 | 1 | 0 | 85  | 2.5 | 75  |
| 0 | 1 | 0 | 1 | 1 | 0 | 86  | 2.5 | 75  |
| 0 | 1 | 0 | 1 | 1 | 0 | 87  | 2.5 | 75  |
| 0 | 1 | 0 | 1 | 1 | 0 | 88  | 2.5 | 75  |
| 0 | 1 | 0 | 1 | 1 | 0 | 89  | 2.5 | 75  |
| 0 | 1 | 0 | 1 | 1 | 0 | 151 | 2.5 | 165 |
| 0 | 1 | 0 | 1 | 1 | 0 | 152 | 2.5 | 165 |
| 0 | 1 | 0 | 1 | 1 | 0 | 153 | 2.5 | 165 |
| 0 | 1 | 0 | 1 | 1 | 0 | 154 | 2.5 | 165 |
| 0 | 1 | 0 | 1 | 1 | 0 | 155 | 2.5 | 165 |
| 0 | 1 | 0 | 1 | 1 | 0 | 156 | 2.5 | 165 |
| 0 | 1 | 0 | 1 | 1 | 0 | 157 | 2.5 | 165 |
| 0 | 1 | 0 | 1 | 1 | 0 | 158 | 2.5 | 165 |
| 0 | 1 | 0 | 1 | 1 | 0 | 159 | 2.5 | 165 |
| 0 | 1 | 0 | 1 | 1 | 0 | 160 | 2.5 | 165 |

|   |   |   |   |   |   |     |     |     |
|---|---|---|---|---|---|-----|-----|-----|
| 0 | 1 | 0 | 1 | 1 | 0 | 161 | 2.5 | 165 |
| 0 | 1 | 0 | 1 | 1 | 0 | 162 | 2.5 | 165 |
| 0 | 1 | 0 | 1 | 1 | 0 | 163 | 2.5 | 165 |
| 0 | 1 | 0 | 1 | 1 | 0 | 164 | 2.5 | 165 |
| 0 | 1 | 0 | 1 | 1 | 0 | 165 | 2.5 | 165 |
| 0 | 1 | 0 | 1 | 1 | 0 | 166 | 2.5 | 165 |
| 0 | 1 | 0 | 1 | 1 | 0 | 167 | 2.5 | 165 |
| 0 | 1 | 0 | 1 | 1 | 0 | 168 | 2.5 | 165 |
| 0 | 1 | 0 | 1 | 1 | 0 | 169 | 2.5 | 165 |
| 0 | 1 | 0 | 1 | 1 | 0 | 170 | 2.5 | 165 |
| 0 | 1 | 0 | 1 | 1 | 0 | 171 | 2.5 | 165 |
| 0 | 1 | 0 | 1 | 1 | 0 | 172 | 2.5 | 165 |
| 0 | 1 | 0 | 1 | 1 | 0 | 173 | 2.5 | 165 |
| 0 | 1 | 0 | 1 | 1 | 0 | 174 | 2.5 | 165 |
| 0 | 1 | 0 | 1 | 1 | 0 | 175 | 2.5 | 165 |
| 0 | 1 | 0 | 1 | 1 | 0 | 176 | 2.5 | 165 |
| 0 | 1 | 0 | 1 | 1 | 0 | 177 | 2.5 | 165 |
| 0 | 1 | 0 | 1 | 1 | 0 | 178 | 2.5 | 165 |
| 0 | 1 | 0 | 1 | 1 | 0 | 179 | 2.5 | 165 |
| 0 | 1 | 0 | 1 | 1 | 0 | 180 | 2.5 | 180 |
| 0 | 1 | 0 | 1 | 0 | 1 | 0   | 2.5 | 0   |
| 0 | 1 | 0 | 1 | 0 | 1 | 1   | 2.5 | 15  |
| 0 | 1 | 0 | 1 | 0 | 1 | 2   | 2.5 | 15  |
| 0 | 1 | 0 | 1 | 0 | 1 | 3   | 2.5 | 15  |
| 0 | 1 | 0 | 1 | 0 | 1 | 4   | 2.5 | 15  |
| 0 | 1 | 0 | 1 | 0 | 1 | 5   | 2.5 | 15  |
| 0 | 1 | 0 | 1 | 0 | 1 | 6   | 2.5 | 15  |
| 0 | 1 | 0 | 1 | 0 | 1 | 7   | 2.5 | 15  |
| 0 | 1 | 0 | 1 | 0 | 1 | 8   | 2.5 | 15  |
| 0 | 1 | 0 | 1 | 0 | 1 | 9   | 2.5 | 15  |
| 0 | 1 | 0 | 1 | 0 | 1 | 10  | 2.5 | 15  |
| 0 | 1 | 0 | 1 | 0 | 1 | 11  | 2.5 | 15  |
| 0 | 1 | 0 | 1 | 0 | 1 | 12  | 2.5 | 15  |
| 0 | 1 | 0 | 1 | 0 | 1 | 13  | 2.5 | 15  |
| 0 | 1 | 0 | 1 | 0 | 1 | 14  | 2.5 | 15  |
| 0 | 1 | 0 | 1 | 0 | 1 | 15  | 2.5 | 15  |
| 0 | 1 | 0 | 1 | 0 | 1 | 16  | 2.5 | 15  |
| 0 | 1 | 0 | 1 | 0 | 1 | 17  | 2.5 | 15  |
| 0 | 1 | 0 | 1 | 0 | 1 | 18  | 2.5 | 15  |
| 0 | 1 | 0 | 1 | 0 | 1 | 19  | 2.5 | 15  |
| 0 | 1 | 0 | 1 | 0 | 1 | 20  | 2.5 | 15  |
| 0 | 1 | 0 | 1 | 0 | 1 | 21  | 2.5 | 15  |
| 0 | 1 | 0 | 1 | 0 | 1 | 22  | 2.5 | 15  |
| 0 | 1 | 0 | 1 | 0 | 1 | 23  | 2.5 | 15  |
| 0 | 1 | 0 | 1 | 0 | 1 | 24  | 2.5 | 15  |
| 0 | 1 | 0 | 1 | 0 | 1 | 25  | 2.5 | 15  |

|   |   |   |   |   |   |     |     |     |
|---|---|---|---|---|---|-----|-----|-----|
| 0 | 1 | 0 | 1 | 0 | 1 | 26  | 2.5 | 15  |
| 0 | 1 | 0 | 1 | 0 | 1 | 27  | 2.5 | 15  |
| 0 | 1 | 0 | 1 | 0 | 1 | 28  | 2.5 | 15  |
| 0 | 1 | 0 | 1 | 0 | 1 | 29  | 2.5 | 15  |
| 0 | 1 | 0 | 1 | 0 | 1 | 61  | 2.5 | 75  |
| 0 | 1 | 0 | 1 | 0 | 1 | 62  | 2.5 | 75  |
| 0 | 1 | 0 | 1 | 0 | 1 | 63  | 2.5 | 75  |
| 0 | 1 | 0 | 1 | 0 | 1 | 64  | 2.5 | 75  |
| 0 | 1 | 0 | 1 | 0 | 1 | 65  | 2.5 | 75  |
| 0 | 1 | 0 | 1 | 0 | 1 | 66  | 2.5 | 75  |
| 0 | 1 | 0 | 1 | 0 | 1 | 67  | 2.5 | 75  |
| 0 | 1 | 0 | 1 | 0 | 1 | 68  | 2.5 | 75  |
| 0 | 1 | 0 | 1 | 0 | 1 | 69  | 2.5 | 75  |
| 0 | 1 | 0 | 1 | 0 | 1 | 70  | 2.5 | 75  |
| 0 | 1 | 0 | 1 | 0 | 1 | 71  | 2.5 | 75  |
| 0 | 1 | 0 | 1 | 0 | 1 | 72  | 2.5 | 75  |
| 0 | 1 | 0 | 1 | 0 | 1 | 73  | 2.5 | 75  |
| 0 | 1 | 0 | 1 | 0 | 1 | 74  | 2.5 | 75  |
| 0 | 1 | 0 | 1 | 0 | 1 | 75  | 2.5 | 75  |
| 0 | 1 | 0 | 1 | 0 | 1 | 76  | 2.5 | 75  |
| 0 | 1 | 0 | 1 | 0 | 1 | 77  | 2.5 | 75  |
| 0 | 1 | 0 | 1 | 0 | 1 | 78  | 2.5 | 75  |
| 0 | 1 | 0 | 1 | 0 | 1 | 79  | 2.5 | 75  |
| 0 | 1 | 0 | 1 | 0 | 1 | 80  | 2.5 | 75  |
| 0 | 1 | 0 | 1 | 0 | 1 | 81  | 2.5 | 75  |
| 0 | 1 | 0 | 1 | 0 | 1 | 82  | 2.5 | 75  |
| 0 | 1 | 0 | 1 | 0 | 1 | 83  | 2.5 | 75  |
| 0 | 1 | 0 | 1 | 0 | 1 | 84  | 2.5 | 75  |
| 0 | 1 | 0 | 1 | 0 | 1 | 85  | 2.5 | 75  |
| 0 | 1 | 0 | 1 | 0 | 1 | 86  | 2.5 | 75  |
| 0 | 1 | 0 | 1 | 0 | 1 | 87  | 2.5 | 75  |
| 0 | 1 | 0 | 1 | 0 | 1 | 88  | 2.5 | 75  |
| 0 | 1 | 0 | 1 | 0 | 1 | 89  | 2.5 | 75  |
| 0 | 1 | 0 | 1 | 0 | 1 | 121 | 2.5 | 135 |
| 0 | 1 | 0 | 1 | 0 | 1 | 122 | 2.5 | 135 |
| 0 | 1 | 0 | 1 | 0 | 1 | 123 | 2.5 | 135 |
| 0 | 1 | 0 | 1 | 0 | 1 | 124 | 2.5 | 135 |
| 0 | 1 | 0 | 1 | 0 | 1 | 125 | 2.5 | 135 |
| 0 | 1 | 0 | 1 | 0 | 1 | 126 | 2.5 | 135 |
| 0 | 1 | 0 | 1 | 0 | 1 | 127 | 2.5 | 135 |
| 0 | 1 | 0 | 1 | 0 | 1 | 128 | 2.5 | 135 |
| 0 | 1 | 0 | 1 | 0 | 1 | 129 | 2.5 | 135 |
| 0 | 1 | 0 | 1 | 0 | 1 | 130 | 2.5 | 135 |
| 0 | 1 | 0 | 1 | 0 | 1 | 131 | 2.5 | 135 |
| 0 | 1 | 0 | 1 | 0 | 1 | 132 | 2.5 | 135 |
| 0 | 1 | 0 | 1 | 0 | 1 | 133 | 2.5 | 135 |
| 0 | 1 | 0 | 1 | 0 | 1 | 134 | 2.5 | 135 |

|   |   |   |   |   |   |     |     |     |
|---|---|---|---|---|---|-----|-----|-----|
| 0 | 1 | 0 | 1 | 0 | 1 | 135 | 2.5 | 135 |
| 0 | 1 | 0 | 1 | 0 | 1 | 136 | 2.5 | 135 |
| 0 | 1 | 0 | 1 | 0 | 1 | 137 | 2.5 | 135 |
| 0 | 1 | 0 | 1 | 0 | 1 | 138 | 2.5 | 135 |
| 0 | 1 | 0 | 1 | 0 | 1 | 139 | 2.5 | 135 |
| 0 | 1 | 0 | 1 | 0 | 1 | 140 | 2.5 | 135 |
| 0 | 1 | 0 | 1 | 0 | 1 | 141 | 2.5 | 135 |
| 0 | 1 | 0 | 1 | 0 | 1 | 142 | 2.5 | 135 |
| 0 | 1 | 0 | 1 | 0 | 1 | 143 | 2.5 | 135 |
| 0 | 1 | 0 | 1 | 0 | 1 | 144 | 2.5 | 135 |
| 0 | 1 | 0 | 1 | 0 | 1 | 145 | 2.5 | 135 |
| 0 | 1 | 0 | 1 | 0 | 1 | 146 | 2.5 | 135 |
| 0 | 1 | 0 | 1 | 0 | 1 | 147 | 2.5 | 135 |
| 0 | 1 | 0 | 1 | 0 | 1 | 148 | 2.5 | 135 |
| 0 | 1 | 0 | 1 | 0 | 1 | 149 | 2.5 | 135 |
| 0 | 1 | 0 | 0 | 1 | 1 | 0   | 2.5 | 0   |
| 0 | 1 | 0 | 0 | 1 | 1 | 1   | 2.5 | 15  |
| 0 | 1 | 0 | 0 | 1 | 1 | 2   | 2.5 | 15  |
| 0 | 1 | 0 | 0 | 1 | 1 | 3   | 2.5 | 15  |
| 0 | 1 | 0 | 0 | 1 | 1 | 4   | 2.5 | 15  |
| 0 | 1 | 0 | 0 | 1 | 1 | 5   | 2.5 | 15  |
| 0 | 1 | 0 | 0 | 1 | 1 | 6   | 2.5 | 15  |
| 0 | 1 | 0 | 0 | 1 | 1 | 7   | 2.5 | 15  |
| 0 | 1 | 0 | 0 | 1 | 1 | 8   | 2.5 | 15  |
| 0 | 1 | 0 | 0 | 1 | 1 | 9   | 2.5 | 15  |
| 0 | 1 | 0 | 0 | 1 | 1 | 10  | 2.5 | 15  |
| 0 | 1 | 0 | 0 | 1 | 1 | 11  | 2.5 | 15  |
| 0 | 1 | 0 | 0 | 1 | 1 | 12  | 2.5 | 15  |
| 0 | 1 | 0 | 0 | 1 | 1 | 13  | 2.5 | 15  |
| 0 | 1 | 0 | 0 | 1 | 1 | 14  | 2.5 | 15  |
| 0 | 1 | 0 | 0 | 1 | 1 | 15  | 2.5 | 15  |
| 0 | 1 | 0 | 0 | 1 | 1 | 16  | 2.5 | 15  |
| 0 | 1 | 0 | 0 | 1 | 1 | 17  | 2.5 | 15  |
| 0 | 1 | 0 | 0 | 1 | 1 | 18  | 2.5 | 15  |
| 0 | 1 | 0 | 0 | 1 | 1 | 19  | 2.5 | 15  |
| 0 | 1 | 0 | 0 | 1 | 1 | 20  | 2.5 | 15  |
| 0 | 1 | 0 | 0 | 1 | 1 | 21  | 2.5 | 15  |
| 0 | 1 | 0 | 0 | 1 | 1 | 22  | 2.5 | 15  |
| 0 | 1 | 0 | 0 | 1 | 1 | 23  | 2.5 | 15  |
| 0 | 1 | 0 | 0 | 1 | 1 | 24  | 2.5 | 15  |
| 0 | 1 | 0 | 0 | 1 | 1 | 25  | 2.5 | 15  |
| 0 | 1 | 0 | 0 | 1 | 1 | 26  | 2.5 | 15  |
| 0 | 1 | 0 | 0 | 1 | 1 | 27  | 2.5 | 15  |
| 0 | 1 | 0 | 0 | 1 | 1 | 28  | 2.5 | 15  |
| 0 | 1 | 0 | 0 | 1 | 1 | 29  | 2.5 | 15  |
| 0 | 1 | 0 | 0 | 1 | 1 | 61  | 2.5 | 75  |

|   |   |   |   |   |   |     |     |     |
|---|---|---|---|---|---|-----|-----|-----|
| 0 | 1 | 0 | 0 | 1 | 1 | 62  | 2.5 | 75  |
| 0 | 1 | 0 | 0 | 1 | 1 | 63  | 2.5 | 75  |
| 0 | 1 | 0 | 0 | 1 | 1 | 64  | 2.5 | 75  |
| 0 | 1 | 0 | 0 | 1 | 1 | 65  | 2.5 | 75  |
| 0 | 1 | 0 | 0 | 1 | 1 | 66  | 2.5 | 75  |
| 0 | 1 | 0 | 0 | 1 | 1 | 67  | 2.5 | 75  |
| 0 | 1 | 0 | 0 | 1 | 1 | 68  | 2.5 | 75  |
| 0 | 1 | 0 | 0 | 1 | 1 | 69  | 2.5 | 75  |
| 0 | 1 | 0 | 0 | 1 | 1 | 70  | 2.5 | 75  |
| 0 | 1 | 0 | 0 | 1 | 1 | 71  | 2.5 | 75  |
| 0 | 1 | 0 | 0 | 1 | 1 | 72  | 2.5 | 75  |
| 0 | 1 | 0 | 0 | 1 | 1 | 73  | 2.5 | 75  |
| 0 | 1 | 0 | 0 | 1 | 1 | 74  | 2.5 | 75  |
| 0 | 1 | 0 | 0 | 1 | 1 | 75  | 2.5 | 75  |
| 0 | 1 | 0 | 0 | 1 | 1 | 76  | 2.5 | 75  |
| 0 | 1 | 0 | 0 | 1 | 1 | 77  | 2.5 | 75  |
| 0 | 1 | 0 | 0 | 1 | 1 | 78  | 2.5 | 75  |
| 0 | 1 | 0 | 0 | 1 | 1 | 79  | 2.5 | 75  |
| 0 | 1 | 0 | 0 | 1 | 1 | 80  | 2.5 | 75  |
| 0 | 1 | 0 | 0 | 1 | 1 | 81  | 2.5 | 75  |
| 0 | 1 | 0 | 0 | 1 | 1 | 82  | 2.5 | 75  |
| 0 | 1 | 0 | 0 | 1 | 1 | 83  | 2.5 | 75  |
| 0 | 1 | 0 | 0 | 1 | 1 | 84  | 2.5 | 75  |
| 0 | 1 | 0 | 0 | 1 | 1 | 85  | 2.5 | 75  |
| 0 | 1 | 0 | 0 | 1 | 1 | 86  | 2.5 | 75  |
| 0 | 1 | 0 | 0 | 1 | 1 | 87  | 2.5 | 75  |
| 0 | 1 | 0 | 0 | 1 | 1 | 88  | 2.5 | 75  |
| 0 | 1 | 0 | 0 | 1 | 1 | 89  | 2.5 | 75  |
| 0 | 1 | 0 | 0 | 1 | 1 | 90  | 2.5 | 90  |
| 0 | 1 | 0 | 0 | 1 | 1 | 91  | 2.5 | 105 |
| 0 | 1 | 0 | 0 | 1 | 1 | 92  | 2.5 | 105 |
| 0 | 1 | 0 | 0 | 1 | 1 | 93  | 2.5 | 105 |
| 0 | 1 | 0 | 0 | 1 | 1 | 94  | 2.5 | 105 |
| 0 | 1 | 0 | 0 | 1 | 1 | 95  | 2.5 | 105 |
| 0 | 1 | 0 | 0 | 1 | 1 | 96  | 2.5 | 105 |
| 0 | 1 | 0 | 0 | 1 | 1 | 97  | 2.5 | 105 |
| 0 | 1 | 0 | 0 | 1 | 1 | 98  | 2.5 | 105 |
| 0 | 1 | 0 | 0 | 1 | 1 | 99  | 2.5 | 105 |
| 0 | 1 | 0 | 0 | 1 | 1 | 100 | 2.5 | 105 |
| 0 | 1 | 0 | 0 | 1 | 1 | 101 | 2.5 | 105 |
| 0 | 1 | 0 | 0 | 1 | 1 | 102 | 2.5 | 105 |
| 0 | 1 | 0 | 0 | 1 | 1 | 103 | 2.5 | 105 |
| 0 | 1 | 0 | 0 | 1 | 1 | 104 | 2.5 | 105 |
| 0 | 1 | 0 | 0 | 1 | 1 | 105 | 2.5 | 105 |
| 0 | 1 | 0 | 0 | 1 | 1 | 106 | 2.5 | 105 |
| 0 | 1 | 0 | 0 | 1 | 1 | 107 | 2.5 | 105 |

|   |   |   |   |   |   |     |     |     |
|---|---|---|---|---|---|-----|-----|-----|
| 0 | 1 | 0 | 0 | 1 | 1 | 108 | 2.5 | 105 |
| 0 | 1 | 0 | 0 | 1 | 1 | 109 | 2.5 | 105 |
| 0 | 1 | 0 | 0 | 1 | 1 | 110 | 2.5 | 105 |
| 0 | 1 | 0 | 0 | 1 | 1 | 111 | 2.5 | 105 |
| 0 | 1 | 0 | 0 | 1 | 1 | 112 | 2.5 | 105 |
| 0 | 1 | 0 | 0 | 1 | 1 | 113 | 2.5 | 105 |
| 0 | 1 | 0 | 0 | 1 | 1 | 114 | 2.5 | 105 |
| 0 | 1 | 0 | 0 | 1 | 1 | 115 | 2.5 | 105 |
| 0 | 1 | 0 | 0 | 1 | 1 | 116 | 2.5 | 105 |
| 0 | 1 | 0 | 0 | 1 | 1 | 117 | 2.5 | 105 |
| 0 | 1 | 0 | 0 | 1 | 1 | 118 | 2.5 | 105 |
| 0 | 1 | 0 | 0 | 1 | 1 | 119 | 2.5 | 105 |
| 0 | 0 | 1 | 1 | 1 | 0 | 0   | 2.5 | 0   |
| 0 | 0 | 1 | 1 | 1 | 0 | 1   | 2.5 | 15  |
| 0 | 0 | 1 | 1 | 1 | 0 | 2   | 2.5 | 15  |
| 0 | 0 | 1 | 1 | 1 | 0 | 3   | 2.5 | 15  |
| 0 | 0 | 1 | 1 | 1 | 0 | 4   | 2.5 | 15  |
| 0 | 0 | 1 | 1 | 1 | 0 | 5   | 2.5 | 15  |
| 0 | 0 | 1 | 1 | 1 | 0 | 6   | 2.5 | 15  |
| 0 | 0 | 1 | 1 | 1 | 0 | 7   | 2.5 | 15  |
| 0 | 0 | 1 | 1 | 1 | 0 | 8   | 2.5 | 15  |
| 0 | 0 | 1 | 1 | 1 | 0 | 9   | 2.5 | 15  |
| 0 | 0 | 1 | 1 | 1 | 0 | 10  | 2.5 | 15  |
| 0 | 0 | 1 | 1 | 1 | 0 | 11  | 2.5 | 15  |
| 0 | 0 | 1 | 1 | 1 | 0 | 12  | 2.5 | 15  |
| 0 | 0 | 1 | 1 | 1 | 0 | 13  | 2.5 | 15  |
| 0 | 0 | 1 | 1 | 1 | 0 | 14  | 2.5 | 15  |
| 0 | 0 | 1 | 1 | 1 | 0 | 15  | 2.5 | 15  |
| 0 | 0 | 1 | 1 | 1 | 0 | 16  | 2.5 | 15  |
| 0 | 0 | 1 | 1 | 1 | 0 | 17  | 2.5 | 15  |
| 0 | 0 | 1 | 1 | 1 | 0 | 18  | 2.5 | 15  |
| 0 | 0 | 1 | 1 | 1 | 0 | 19  | 2.5 | 15  |
| 0 | 0 | 1 | 1 | 1 | 0 | 20  | 2.5 | 15  |
| 0 | 0 | 1 | 1 | 1 | 0 | 21  | 2.5 | 15  |
| 0 | 0 | 1 | 1 | 1 | 0 | 22  | 2.5 | 15  |
| 0 | 0 | 1 | 1 | 1 | 0 | 23  | 2.5 | 15  |
| 0 | 0 | 1 | 1 | 1 | 0 | 24  | 2.5 | 15  |
| 0 | 0 | 1 | 1 | 1 | 0 | 25  | 2.5 | 15  |
| 0 | 0 | 1 | 1 | 1 | 0 | 26  | 2.5 | 15  |
| 0 | 0 | 1 | 1 | 1 | 0 | 27  | 2.5 | 15  |
| 0 | 0 | 1 | 1 | 1 | 0 | 28  | 2.5 | 15  |
| 0 | 0 | 1 | 1 | 1 | 0 | 29  | 2.5 | 15  |
| 0 | 0 | 1 | 1 | 1 | 0 | 30  | 2.5 | 30  |
| 0 | 0 | 1 | 1 | 1 | 0 | 31  | 2.5 | 45  |
| 0 | 0 | 1 | 1 | 1 | 0 | 32  | 2.5 | 45  |
| 0 | 0 | 1 | 1 | 1 | 0 | 33  | 2.5 | 45  |

|   |   |   |   |   |   |     |     |     |
|---|---|---|---|---|---|-----|-----|-----|
| 0 | 0 | 1 | 1 | 1 | 0 | 34  | 2.5 | 45  |
| 0 | 0 | 1 | 1 | 1 | 0 | 35  | 2.5 | 45  |
| 0 | 0 | 1 | 1 | 1 | 0 | 36  | 2.5 | 45  |
| 0 | 0 | 1 | 1 | 1 | 0 | 37  | 2.5 | 45  |
| 0 | 0 | 1 | 1 | 1 | 0 | 38  | 2.5 | 45  |
| 0 | 0 | 1 | 1 | 1 | 0 | 39  | 2.5 | 45  |
| 0 | 0 | 1 | 1 | 1 | 0 | 40  | 2.5 | 45  |
| 0 | 0 | 1 | 1 | 1 | 0 | 41  | 2.5 | 45  |
| 0 | 0 | 1 | 1 | 1 | 0 | 42  | 2.5 | 45  |
| 0 | 0 | 1 | 1 | 1 | 0 | 43  | 2.5 | 45  |
| 0 | 0 | 1 | 1 | 1 | 0 | 44  | 2.5 | 45  |
| 0 | 0 | 1 | 1 | 1 | 0 | 45  | 2.5 | 45  |
| 0 | 0 | 1 | 1 | 1 | 0 | 46  | 2.5 | 45  |
| 0 | 0 | 1 | 1 | 1 | 0 | 47  | 2.5 | 45  |
| 0 | 0 | 1 | 1 | 1 | 0 | 48  | 2.5 | 45  |
| 0 | 0 | 1 | 1 | 1 | 0 | 49  | 2.5 | 45  |
| 0 | 0 | 1 | 1 | 1 | 0 | 50  | 2.5 | 45  |
| 0 | 0 | 1 | 1 | 1 | 0 | 51  | 2.5 | 45  |
| 0 | 0 | 1 | 1 | 1 | 0 | 52  | 2.5 | 45  |
| 0 | 0 | 1 | 1 | 1 | 0 | 53  | 2.5 | 45  |
| 0 | 0 | 1 | 1 | 1 | 0 | 54  | 2.5 | 45  |
| 0 | 0 | 1 | 1 | 1 | 0 | 55  | 2.5 | 45  |
| 0 | 0 | 1 | 1 | 1 | 0 | 56  | 2.5 | 45  |
| 0 | 0 | 1 | 1 | 1 | 0 | 57  | 2.5 | 45  |
| 0 | 0 | 1 | 1 | 1 | 0 | 58  | 2.5 | 45  |
| 0 | 0 | 1 | 1 | 1 | 0 | 59  | 2.5 | 45  |
| 0 | 0 | 1 | 1 | 1 | 0 | 151 | 2.5 | 165 |
| 0 | 0 | 1 | 1 | 1 | 0 | 152 | 2.5 | 165 |
| 0 | 0 | 1 | 1 | 1 | 0 | 153 | 2.5 | 165 |
| 0 | 0 | 1 | 1 | 1 | 0 | 154 | 2.5 | 165 |
| 0 | 0 | 1 | 1 | 1 | 0 | 155 | 2.5 | 165 |
| 0 | 0 | 1 | 1 | 1 | 0 | 156 | 2.5 | 165 |
| 0 | 0 | 1 | 1 | 1 | 0 | 157 | 2.5 | 165 |
| 0 | 0 | 1 | 1 | 1 | 0 | 158 | 2.5 | 165 |
| 0 | 0 | 1 | 1 | 1 | 0 | 159 | 2.5 | 165 |
| 0 | 0 | 1 | 1 | 1 | 0 | 160 | 2.5 | 165 |
| 0 | 0 | 1 | 1 | 1 | 0 | 161 | 2.5 | 165 |
| 0 | 0 | 1 | 1 | 1 | 0 | 162 | 2.5 | 165 |
| 0 | 0 | 1 | 1 | 1 | 0 | 163 | 2.5 | 165 |
| 0 | 0 | 1 | 1 | 1 | 0 | 164 | 2.5 | 165 |
| 0 | 0 | 1 | 1 | 1 | 0 | 165 | 2.5 | 165 |
| 0 | 0 | 1 | 1 | 1 | 0 | 166 | 2.5 | 165 |
| 0 | 0 | 1 | 1 | 1 | 0 | 167 | 2.5 | 165 |
| 0 | 0 | 1 | 1 | 1 | 0 | 168 | 2.5 | 165 |
| 0 | 0 | 1 | 1 | 1 | 0 | 169 | 2.5 | 165 |
| 0 | 0 | 1 | 1 | 1 | 0 | 170 | 2.5 | 165 |
| 0 | 0 | 1 | 1 | 1 | 0 | 171 | 2.5 | 165 |

|   |   |   |   |   |   |     |     |     |
|---|---|---|---|---|---|-----|-----|-----|
| 0 | 0 | 1 | 1 | 1 | 0 | 172 | 2.5 | 165 |
| 0 | 0 | 1 | 1 | 1 | 0 | 173 | 2.5 | 165 |
| 0 | 0 | 1 | 1 | 1 | 0 | 174 | 2.5 | 165 |
| 0 | 0 | 1 | 1 | 1 | 0 | 175 | 2.5 | 165 |
| 0 | 0 | 1 | 1 | 1 | 0 | 176 | 2.5 | 165 |
| 0 | 0 | 1 | 1 | 1 | 0 | 177 | 2.5 | 165 |
| 0 | 0 | 1 | 1 | 1 | 0 | 178 | 2.5 | 165 |
| 0 | 0 | 1 | 1 | 1 | 0 | 179 | 2.5 | 165 |
| 0 | 0 | 1 | 1 | 1 | 0 | 180 | 2.5 | 180 |
| 0 | 0 | 1 | 1 | 0 | 1 | 0   | 2.5 | 0   |
| 0 | 0 | 1 | 1 | 0 | 1 | 1   | 2.5 | 15  |
| 0 | 0 | 1 | 1 | 0 | 1 | 2   | 2.5 | 15  |
| 0 | 0 | 1 | 1 | 0 | 1 | 3   | 2.5 | 15  |
| 0 | 0 | 1 | 1 | 0 | 1 | 4   | 2.5 | 15  |
| 0 | 0 | 1 | 1 | 0 | 1 | 5   | 2.5 | 15  |
| 0 | 0 | 1 | 1 | 0 | 1 | 6   | 2.5 | 15  |
| 0 | 0 | 1 | 1 | 0 | 1 | 7   | 2.5 | 15  |
| 0 | 0 | 1 | 1 | 0 | 1 | 8   | 2.5 | 15  |
| 0 | 0 | 1 | 1 | 0 | 1 | 9   | 2.5 | 15  |
| 0 | 0 | 1 | 1 | 0 | 1 | 10  | 2.5 | 15  |
| 0 | 0 | 1 | 1 | 0 | 1 | 11  | 2.5 | 15  |
| 0 | 0 | 1 | 1 | 0 | 1 | 12  | 2.5 | 15  |
